# Supplementary material for: Analyzing the defense response mechanism of Atractylodes macrocephala to Fusarium oxysporum through small RNA and degradome sequencing
Source: Front Plant Sci. 2024 Jul 22;15:1415209. doi: 10.3389/fpls.2024.1415209 (PMC11298489; doi:10.3389/fpls.2024.1415209)
Supplement: Supplementary file 4 [file Table_1.xlsx]

## Sheet: Sheet1
Table S1 Primers used in this study
Name	Primers
Matk F	TGCCCCAATGCGTTACAAAATTTCG
Matk R	AAAGCCTTCAATGGTCCGCAGTC
Matk R	CGAGGTGTGGATTTAGGAGATG
Prot R	GTGCTGATTCGTTGTACGTTATTC
RT-miR477a	GTCGTATCCAGTGCAGGGTCCGAGGTATTCGCACTGGATACGACGAGAAG
RT-miR156g	GTCGTATCCAGTGCAGGGTCCGAGGTATTCGCACTGGATACGACGTGCTC
RT-miR396	GTCGTATCCAGTGCAGGGTCCGAGGTATTCGCACTGGATACGACAGTTCA
RT-m1303	GTCGTATCCAGTGCAGGGTCCGAGGTATTCGCACTGGATACGACTCGGAT
Q-U6 F	GGAACGATACAGAGAAGATTAGC
Q-U6 R	TTGGACCATTTCTCGATTTG
Q-miR477a F	CGCGACTCTCCCTCAAGGG
Q-miR156g F	CGCGCGGACAGAAGAGAGT
Q-miR396 F	GCGCGTTCCACAGCTTTCT
Q-m1303 F	CGCGGAAACTTCGTCTCTGA
Q-miRNA R	AGTGCAGGGTCCGAGGTATT
Q-Am Actin F	GATCTTGCCGGACGTGATCT
Q-Am Actin R	TTGCTCATAGTCAAGCGCGA
Q-DN4691 F	CCGCTGCCGCCACTATGAAC
Q-DN4691 R	AGGAGGGTGGAGGAGACAACAAC
Q-DN7655 F	TCCTCCTCCTCCTCCTCCTCTTC
Q-DN7655 R	GCTGATTTTGACGCCATTACACTCG60
Q-DN6164 F	CACTAGCGGAAGGGAAGGCAAAG
Q-DN6164 R	GGGTCAGCGGCACACATTCG
Q-DN9134 F	CTGGAAGTGTAACGGAGCGAGATTG
Q-DN9134 R	CCCGACCCGACTTTCAACAACAG
