# Supplementary material for: Analyzing the defense response mechanism of Atractylodes macrocephala to Fusarium oxysporum through small RNA and degradome sequencing
Source: Front Plant Sci. 2024 Jul 22;15:1415209. doi: 10.3389/fpls.2024.1415209 (PMC11298489; doi:10.3389/fpls.2024.1415209)
Supplement: Supplementary file 5 [file Table_2.xlsx]

## Sheet: raw data
Table S2 miRNA sequencing raw data
Sample_ID	Total_Reads	Total_Bases	Error%	Q20%	Q30%	GC%	Adapter_only	N_reads	<18nt	>32nt	Clean_reads
CG-1	36483049	1860635499	0.0239	98.25	95.5	50.7	640634	23121	13287713	839000	21692581
CG-2	21471357	1095039207	0.024	98.29	95.33	51.15	70971	16076	6753232	194537	14436541
CG-3	38280862	1952323962	0.023	98.78	96.32	51.58	166358	22612	11709600	521480	25860812
Fo-6d-1	36709133	1872165783	0.0232	98.67	96.07	50.32	287017	22850	8351815	358313	27689138
Fo-6d-2	38225693	1949510343	0.0231	98.72	96.25	50.36	512104	25476	8659689	289848	28738576
Fo-6d-3	35185158	1794443058	0.0236	98.38	95.78	50.2	1217053	21003	9224439	176085	24546578
Fo-12d-1	36855882	1879649982	0.0232	98.64	96.14	50.39	218228	25332	6072916	586401	29953005
Fo-12d-2	34997311	1784862861	0.023	98.76	96.33	50.57	279422	23272	6782924	495092	27416601
Fo-12d-3	38466713	1961802363	0.0231	98.7	96.24	50.01	425094	27819	7572910	697402	29743488

## Sheet: rfam
Sample	CG-1				CG-2				CG-3				Fo-6d-1				Fo-6d-2				Fo-6d-3				Fo-12d-1				Fo-12d-2				Fo-12d-3
Types	Uniq_num	Uniq_percent	Total_num	Total_percent	Uniq_num	Uniq_percent	Total_num	Total_percent	Uniq_num	Uniq_percent	Total_num	Total_percent	Uniq_num	Uniq_percent	Total_num	Total_percent	Uniq_num	Uniq_percent	Total_num	Total_percent	Uniq_num	Uniq_percent	Total_num	Total_percent	Uniq_num	Uniq_percent	Total_num	Total_percent	Uniq_num	Uniq_percent	Total_num	Total_percent	Uniq_num	Uniq_percent	Total_num	Total_percent
All_reads	4470235	1	21692581	1	3443133	1	14436541	1	4661095	1	25860812	1	2909664	1	27689138	1	3660021	1	28738576	1	1364441	1	24546578	1	5148252	1	29953005	1	3830154	1	27416601	1	6149876	1	29743488	1
All_matched	621517	0.139	9882804	0.4556	636666	0.1849	7914354	0.5482	686462	0.1473	13566532	0.5246	240531	0.0827	18837975	0.6803	233185	0.0637	14357696	0.4996	134632	0.0987	14214505	0.5791	796430	0.1547	15699446	0.5241	535981	0.1399	16138568	0.5886	489545	0.0796	11017503	0.3704
CRISPR	4	0	7	0	119	0	192	0	1012	0.0002	3351	0.0001	2	0	3	0	1170	0.0003	61272	0.0021	6118	0.0045	120730	0.0049	6807	0.0013	32121	0.0011	467781	0.1221	14692761	0.5359	418825	0.0681	9790862	0.3292
rRNA	538760	0.1205	8833186	0.4072	4476	0.0013	11888	0.0008	865	0.0002	3353	0.0001	209444	0.072	18280757	0.6602	14927	0.0041	763733	0.0266	456	0.0003	22822	0.0009	221	0	469	0	2	0	4	0	6	0	12	0
sRNA	932	0.0002	3803	0.0002	679	0.0002	1226	0.0001	2	0	2	0	310	0.0001	817	0	13285	0.0036	249066	0.0087	423	0.0003	3038	0.0001	2800	0.0005	179900	0.006	989	0.0003	2799	0.0001	1651	0.0003	4911	0.0002
Intron	930	0.0002	2528	0.0001	1769	0.0005	36881	0.0026	586213	0.1258	11829562	0.4574	830	0.0003	2569	0.0001	1	0	2	0	4368	0.0032	157692	0.0064	923	0.0002	2460	0.0001	748	0.0002	3255	0.0001	715	0.0001	1793	0.0001
CisRNA	1477	0.0003	17407	0.0008	209	0.0001	362	0	310	0.0001	702	0	12301	0.0042	159114	0.0057	121	0	364	0	106	0.0001	688	0	234	0	609	0	1249	0.0003	46012	0.0017	5	0	10	0
tRNA	60465	0.0135	860069	0.0396	2	0	3	0	2	0	4	0	951	0.0003	30024	0.0011	2290	0.0006	91282	0.0032	120609	0.0884	13801786	0.5623	7	0	15	0	42073	0.011	1118722	0.0408	160	0	356	0
snRNA	9911	0.0022	53180	0.0025	8602	0.0025	38556	0.0027	5742	0.0012	19224	0.0007	11596	0.004	300135	0.0108	264	0.0001	852	0	1256	0.0009	15540	0.0006	16164	0.0031	161082	0.0054	14689	0.0038	144269	0.0053	519	0.0001	1428	0
antitoxin	2	0	3	0	57550	0.0167	607514	0.0421	181	0	334	0	1853	0.0006	44913	0.0016	3008	0.0008	22519	0.0008	74	0.0001	396	0	1743	0.0003	26351	0.0009	4	0	8	0	3373	0.0005	134545	0.0045
antisense	260	0.0001	626	0	1111	0.0003	9743	0.0007	2328	0.0005	61915	0.0024	236	0.0001	675	0	208	0.0001	618	0	1117	0.0008	91261	0.0037	66058	0.0128	1236337	0.0413	231	0.0001	602	0	288	0	612	0
ribozyme	819	0.0002	2031	0.0001	740	0.0002	2139	0.0001	758	0.0002	1856	0.0001	2782	0.001	18349	0.0007	2	0	6	0	72	0.0001	410	0	1228	0.0002	3539	0.0001	609	0.0002	1984	0.0001	5084	0.0008	26870	0.0009
miRNA	2418	0.0005	89697	0.0041	748	0.0002	2063	0.0001	1509	0.0003	18787	0.0007	143	0	411	0	196498	0.0537	13162834	0.458	30	0	132	0	1013	0.0002	5020	0.0002	2293	0.0006	97481	0.0036	39540	0.0064	828161	0.0278
lncRNA	203	0	394	0	4	0	7	0	74959	0.0161	1522531	0.0589	4	0	13	0	1063	0.0003	4060	0.0001	3	0	10	0	6	0	19	0	196	0.0001	435	0	1923	0.0003	44605	0.0015
Gene	5336	0.0012	19873	0.0009	560657	0.1628	7203780	0.499	12581	0.0027	104911	0.0041	79	0	195	0	348	0.0001	1088	0					699226	0.1358	14051524	0.4691	5117	0.0013	30236	0.0011	17456	0.0028	183338	0.0062
