# Supplementary material for: Analyzing the defense response mechanism of Atractylodes macrocephala to Fusarium oxysporum through small RNA and degradome sequencing
Source: Front Plant Sci. 2024 Jul 22;15:1415209. doi: 10.3389/fpls.2024.1415209 (PMC11298489; doi:10.3389/fpls.2024.1415209)
Supplement: Supplementary file 6 [file Table_3.xlsx]

## Sheet: known miRNA
Table S3 Summary of known and predicted miRNA in this study
miRNA_Index	miR_name	miR_pre	family
1	aau-miR168	aau-MIR168	MIR168
2	aqc-miR529	aqc-MIR529	MIR529
3	ahy-miR156a	ahy-MIR156a	MIR156
4	sbi-miR156d	sbi-MIR156d	MIR156
5	far-miR156b	far-MIR156b	MIR156
6	gma-miR156f	gma-MIR156f	MIR156
7	osa-miR160f-5p	osa-MIR160f	MIR160
8	bna-miR167d	bna-MIR167d	MIR167_1
9	ptc-miR167f-5p	ptc-MIR167f	MIR167_1
10	mdm-miR167h	mdm-MIR167h	MIR167_1
11	ahy-miR3509-5p	ahy-MIR3509	-
12	ahy-miR3510	ahy-MIR3510	-
13	ahy-miR3513-5p	ahy-MIR3513	-
14	ahy-miR3514-5p	ahy-MIR3514	-
15	hbr-miR408b	hbr-MIR408b	MIR408
16	ahy-miR408-5p	ahy-MIR408	MIR408
17	stu-miR156f-5p	stu-MIR156f	MIR156
18	ama-miR156	ama-MIR156	MIR156
19	ath-miR156c-5p	ath-MIR156c	MIR156
20	bna-miR156a	bna-MIR156a	MIR156
21	cme-miR156j	cme-MIR156j	MIR156
22	ath-miR156c-5p	ath-MIR156c	MIR156
23	bna-miR156a	bna-MIR156a	MIR156
24	gma-miR156k	gma-MIR156k	MIR156
25	aly-miR156g-5p	aly-MIR156g	MIR156
26	ath-miR156h	ath-MIR156h	MIR156
27	smo-miR156c	smo-MIR156c	MIR156
28	gma-miR156e	gma-MIR156e	MIR156
29	aqc-miR156a	aqc-MIR156a	MIR156
30	ath-miR158a-5p	ath-MIR158a	MIR158
31	aly-miR158b-5p	aly-MIR158b	MIR158
32	ath-miR158a-5p	ath-MIR158a	MIR158
33	aly-miR158b-5p	aly-MIR158b	MIR158
34	aly-miR159b-5p	aly-MIR159b	MIR159
35	ath-miR161.1	ath-MIR161	MIR161
36	aly-miR161-5p.1	aly-MIR161	MIR161
37	gma-miR164b	gma-MIR164b	MIR164
38	ath-miR164b-5p	ath-MIR164b	MIR164
39	bra-miR164e-5p	bra-MIR164e	MIR164
40	aly-miR165a-5p	aly-MIR165a	MIR166
41	ath-miR165a-5p	ath-MIR165a	MIR166
42	aly-miR165b-5p	aly-MIR165b	MIR166
43	ath-miR166e-5p	ath-MIR166e	MIR166
44	aly-miR166g-5p	aly-MIR166g	MIR166
45	bna-miR167d	bna-MIR167d	MIR167_1
46	osa-miR167a-5p	osa-MIR167a	MIR167_1
47	gma-miR168b	gma-MIR168b	MIR168
48	cme-miR168	cme-MIR168	MIR168
49	ath-miR168a-5p	ath-MIR168a	MIR168
50	gma-miR169v	gma-MIR169v	MIR169_2
51	ath-miR169a-5p	ath-MIR169a	MIR169_2
52	sbi-miR169d-5p	sbi-MIR169d	MIR169_1
53	ath-miR169h	ath-MIR169h	MIR169_1
54	aly-miR171b-5p	aly-MIR171b	MIR171_1
55	ath-miR171c-5p	ath-MIR171c	MIR171_1
56	zma-miR171c-5p	zma-MIR171c	MIR171_1
57	ath-miR173-5p	ath-MIR173	MIR173
58	aly-miR1887	aly-MIR1887	MIR1887
59	ath-miR1887	ath-MIR1887	MIR1887
60	ath-miR2111a-5p	ath-MIR2111a	MIR2111
61	ath-miR2111a-5p	ath-MIR2111a	MIR2111
62	ath-miR2111a-5p	ath-MIR2111a	MIR2111
63	ath-miR2112-5p	ath-MIR2112	MIR2112
64	aly-miR319a-5p	aly-MIR319a	MIR159
65	aly-miR3436-5p	aly-MIR3436	-
66	aly-miR3437-5p	aly-MIR3437	-
67	aly-miR3441-5p.2	aly-MIR3441	-
68	aly-miR3442-5p	aly-MIR3442	-
69	aly-miR3447-5p	aly-MIR3447	-
70	aly-miR3449-5p	aly-MIR3449	-
71	ath-miR390b-5p	ath-MIR390b	MIR390
72	gma-miR390e	gma-MIR390e	MIR390
73	atr-miR390.1	atr-MIR390	MIR390
74	ath-miR390b-5p	ath-MIR390b	MIR390
75	gma-miR390e	gma-MIR390e	MIR390
76	atr-miR390.1	atr-MIR390	MIR390
77	aly-miR391-5p	aly-MIR391	MIR391
78	ath-miR394a	ath-MIR394a	MIR394
79	aly-miR395b-5p	aly-MIR395b	MIR395
80	aly-miR395f-5p	aly-MIR395f	MIR395
81	aly-miR395g-5p	aly-MIR395g	MIR395
82	gma-miR396h	gma-MIR396h	MIR396
83	sbi-miR396b	sbi-MIR396b	MIR396
84	hbr-miR396a	hbr-MIR396a	MIR396
85	osa-miR396c-5p	osa-MIR396c	MIR396
86	aly-miR398b-5p	aly-MIR398b	MIR398
87	aly-miR398c-5p	aly-MIR398c	MIR398
88	aly-miR399a-5p	aly-MIR399a	MIR399
89	aly-miR399b-5p	aly-MIR399b	MIR399
90	ath-miR399c-5p	ath-MIR399c	MIR399
91	aly-miR399d-5p	aly-MIR399d	MIR399
92	aly-miR399i-5p	aly-MIR399i	MIR399
93	aly-miR403b-5p	aly-MIR403b	MIR403
94	aly-miR4231	aly-MIR4231	-
95	aly-miR4243	aly-MIR4243	MIR4243
96	aly-miR4244	aly-MIR4244	-
97	aly-miR4247	aly-MIR4247	-
98	aly-miR4248a	aly-MIR4248a	MIR4208
99	aly-miR4248a	aly-MIR4248a	MIR4208
100	aly-miR4249	aly-MIR4249	-
101	aly-miR4250	aly-MIR4250	-
102	aly-miR774a-5p.2	aly-MIR774a	MIR774
103	aly-miR774a-5p.1	aly-MIR774a	MIR774
104	aly-miR774b-5p	aly-MIR774b	MIR774
105	aly-miR781-5p	aly-MIR781	MIR781
106	bol-miR824	bol-MIR824	MIR824
107	aly-miR825-5p	aly-MIR825	MIR825
108	aly-miR831-5p	aly-MIR831	MIR831
109	aly-miR834-5p	aly-MIR834	MIR834
110	aly-miR835-5p	aly-MIR835	MIR835
111	aly-miR845a-5p	aly-MIR845a	MIR845_1
112	aly-miR848-5p	aly-MIR848	MIR848
113	aly-miR853-5p	aly-MIR853	MIR853
114	aly-miR856-5p	aly-MIR856	MIR856
115	aly-miR857-5p	aly-MIR857	MIR857
116	aly-miR859-5p	aly-MIR859	MIR859
117	aly-miR860-5p	aly-MIR860	MIR860
118	aly-miR861-5p	aly-MIR861	MIR861
119	stu-miR156f-5p	stu-MIR156f	MIR156
120	ama-miR156	ama-MIR156	MIR156
121	ath-miR156c-5p	ath-MIR156c	MIR156
122	bna-miR156a	bna-MIR156a	MIR156
123	gma-miR156g	gma-MIR156g	MIR156
124	aqc-miR156a	aqc-MIR156a	MIR156
125	hbr-miR156	hbr-MIR156	MIR156
126	ath-miR157b-5p	ath-MIR157b	MIR156
127	ppt-miR529d	ppt-MIR529d	MIR529
128	ahy-miR156a	ahy-MIR156a	MIR156
129	sbi-miR156d	sbi-MIR156d	MIR156
130	gma-miR160c	gma-MIR160c	MIR160
131	ath-miR160a-5p	ath-MIR160a	MIR160
132	bna-miR167d	bna-MIR167d	MIR167_1
133	osa-miR167a-5p	osa-MIR167a	MIR167_1
134	bna-miR167d	bna-MIR167d	MIR167_1
135	osa-miR167d-5p	osa-MIR167d	MIR167_1
136	ctr-miR167	ctr-MIR167	MIR167_1
137	bna-miR167d	bna-MIR167d	MIR167_1
138	osa-miR167d-5p	osa-MIR167d	MIR167_1
139	ath-miR167d	ath-MIR167d	MIR167_1
140	gma-miR168b	gma-MIR168b	MIR168
141	cme-miR168	cme-MIR168	MIR168
142	ath-miR168a-5p	ath-MIR168a	MIR168
143	gma-miR168b	gma-MIR168b	MIR168
144	mtr-miR169f	mtr-MIR169f	-
145	zma-miR171n-5p	zma-MIR171n	MIR171_1
146	mtr-miR319a-5p	mtr-MIR319a	MIR159
147	ppe-miR393a	ppe-MIR393a	MIR393
148	mdm-miR396f	mdm-MIR396f	MIR396
149	mes-miR477i	mes-MIR477i	MIR477
150	ppt-miR535c	ppt-MIR535c	MIR535
151	gma-miR156g	gma-MIR156g	MIR156
152	aqc-miR156a	aqc-MIR156a	MIR156
153	ptc-miR160g	ptc-MIR160g	MIR160
154	aqc-miR168	aqc-MIR168	-
155	sbi-miR169d-5p	sbi-MIR169d	MIR169_1
156	osa-miR169g	osa-MIR169g	MIR169_1
157	sbi-miR169d-5p	sbi-MIR169d	MIR169_1
158	ath-miR169h	ath-MIR169h	MIR169_1
159	bra-miR172d-5p	bra-MIR172d	MIR172
160	aqc-miR477e	aqc-MIR477e	MIR477
161	aqc-miR477d	aqc-MIR477d	MIR477
162	aqc-miR477e	aqc-MIR477e	MIR477
163	aqc-miR477g	aqc-MIR477g	MIR477
164	stu-miR156f-5p	stu-MIR156f	MIR156
165	ama-miR156	ama-MIR156	MIR156
166	ath-miR156c-5p	ath-MIR156c	MIR156
167	bna-miR156a	bna-MIR156a	MIR156
168	stu-miR156f-5p	stu-MIR156f	MIR156
169	ama-miR156	ama-MIR156	MIR156
170	ath-miR156c-5p	ath-MIR156c	MIR156
171	bna-miR156a	bna-MIR156a	MIR156
172	ath-miR156c-5p	ath-MIR156c	MIR156
173	bna-miR156a	bna-MIR156a	MIR156
174	ath-miR156c-5p	ath-MIR156c	MIR156
175	bna-miR156a	bna-MIR156a	MIR156
176	gma-miR156k	gma-MIR156k	MIR156
177	stu-miR156f-5p	stu-MIR156f	MIR156
178	ama-miR156	ama-MIR156	MIR156
179	ath-miR156c-5p	ath-MIR156c	MIR156
180	bna-miR156a	bna-MIR156a	MIR156
181	gma-miR160c	gma-MIR160c	MIR160
182	ath-miR160a-5p	ath-MIR160a	MIR160
183	gma-miR164b	gma-MIR164b	MIR164
184	osa-miR164d	osa-MIR164d	MIR164
185	gma-miR164b	gma-MIR164b	MIR164
186	ath-miR164b-5p	ath-MIR164b	MIR164
187	osa-miR166a-5p	osa-MIR166a	MIR166
188	ata-miR166b-5p	ata-MIR166b	MIR166
189	ata-miR166c-5p	ata-MIR166c	MIR166
190	osa-miR166b-5p	osa-MIR166b	MIR166
191	bna-miR167d	bna-MIR167d	MIR167_1
192	osa-miR167d-5p	osa-MIR167d	MIR167_1
193	ctr-miR167	ctr-MIR167	MIR167_1
194	bna-miR167d	bna-MIR167d	MIR167_1
195	osa-miR167a-5p	osa-MIR167a	MIR167_1
196	bna-miR167d	bna-MIR167d	MIR167_1
197	osa-miR167d-5p	osa-MIR167d	MIR167_1
198	ctr-miR167	ctr-MIR167	MIR167_1
199	osa-miR169r-5p	osa-MIR169r	MIR169_1
200	bdi-miR169k-5p	bdi-MIR169k	MIR169_1
201	ata-miR169j-5p	ata-MIR169j	MIR169_1
202	sbi-miR169d-5p	sbi-MIR169d	MIR169_1
203	osa-miR169g	osa-MIR169g	MIR169_1
204	gma-miR169e	gma-MIR169e	MIR169_6
205	gma-miR169v	gma-MIR169v	MIR169_2
206	ath-miR169b-5p	ath-MIR169b	MIR169_2
207	gma-miR169v	gma-MIR169v	MIR169_2
208	ath-miR169a-5p	ath-MIR169a	MIR169_2
209	gma-miR169v	gma-MIR169v	MIR169_2
210	ath-miR169a-5p	ath-MIR169a	MIR169_2
211	gma-miR169e	gma-MIR169e	MIR169_6
212	bdi-miR169m	bdi-MIR169m	MIR169_2
213	mes-miR169f	mes-MIR169f	MIR169_2
214	sbi-miR169d-5p	sbi-MIR169d	MIR169_1
215	ath-miR169h	ath-MIR169h	MIR169_1
216	osa-miR169r-5p	osa-MIR169r	MIR169_1
217	bdi-miR169k-5p	bdi-MIR169k	MIR169_1
218	ata-miR169j-5p	ata-MIR169j	MIR169_1
219	ata-miR171a-5p	ata-MIR171a	MIR171_2
220	zma-miR171h-5p	zma-MIR171h	MIR171_2
221	bdi-miR171d-5p	bdi-MIR171d	MIR171_1
222	ata-miR172a-5p	ata-MIR172a	MIR172
223	ata-miR172c-5p	ata-MIR172c	MIR172
224	ata-miR2275c-5p	ata-MIR2275c	MIR2275
225	bdi-miR319b-5p	bdi-MIR319b	MIR159
226	zma-miR319c-5p	zma-MIR319c	MIR159
227	ath-miR390b-5p	ath-MIR390b	MIR390
228	gma-miR390e	gma-MIR390e	MIR390
229	ath-miR394a	ath-MIR394a	MIR394
230	ata-miR395a-5p	ata-MIR395a	MIR395
231	ata-miR395b-5p	ata-MIR395b	MIR395
232	ata-miR395c-5p	ata-MIR395c	MIR395
233	ata-miR395a-5p	ata-MIR395a	MIR395
234	sbi-miR396d	sbi-MIR396d	MIR396
235	osa-miR396e-5p	osa-MIR396e	MIR396
236	osa-miR396f-5p	osa-MIR396f	MIR396
237	tae-miR396-5p	tae-MIR396	-
238	sbi-miR396d	sbi-MIR396d	MIR396
239	osa-miR396e-5p	osa-MIR396e	MIR396
240	osa-miR396f-5p	osa-MIR396f	MIR396
241	gma-miR396h	gma-MIR396h	MIR396
242	sbi-miR396b	sbi-MIR396b	MIR396
243	ata-miR399a-5p	ata-MIR399a	MIR399
244	ata-miR5062b-5p	ata-MIR5062b	MIR5062
245	ata-miR5070-5p	ata-MIR5070	MIR5070
246	ata-miR5084-5p	ata-MIR5084	MIR5084
247	ata-miR5168-5p	ata-MIR5168	MIR166
248	bdi-miR166g-5p	bdi-MIR166g	MIR166
249	ata-miR9674b-5p	ata-MIR9674b	MIR9674
250	ata-miR9674c-5p	ata-MIR9674c	-
251	ata-miR9772a-5p	ata-MIR9772a	MIR9772
252	ata-miR9772a-5p	ata-MIR9772a	MIR9772
253	ata-miR9776-5p	ata-MIR9776	MIR9776
254	tae-miR9776	tae-MIR9776	MIR9776
255	stu-miR156f-5p	stu-MIR156f	MIR156
256	ama-miR156	ama-MIR156	MIR156
257	ath-miR156c-5p	ath-MIR156c	MIR156
258	bna-miR156a	bna-MIR156a	MIR156
259	ath-miR156c-5p	ath-MIR156c	MIR156
260	bna-miR156a	bna-MIR156a	MIR156
261	ath-miR156h	ath-MIR156h	MIR156
262	smo-miR156c	smo-MIR156c	MIR156
263	ath-miR156i	ath-MIR156i	-
264	gma-miR156g	gma-MIR156g	MIR156
265	aqc-miR156a	aqc-MIR156a	MIR156
266	hbr-miR156	hbr-MIR156	MIR156
267	ath-miR157b-5p	ath-MIR157b	MIR156
268	aqc-miR156a	aqc-MIR156a	MIR156
269	hbr-miR156	hbr-MIR156	MIR156
270	ath-miR157b-5p	ath-MIR157b	MIR156
271	ath-miR158a-5p	ath-MIR158a	MIR158
272	aly-miR158b-5p	aly-MIR158b	MIR158
273	aly-miR159c-5p	aly-MIR159c	MIR159
274	gma-miR160c	gma-MIR160c	MIR160
275	ath-miR160a-5p	ath-MIR160a	MIR160
276	gma-miR160c	gma-MIR160c	MIR160
277	ath-miR160a-5p	ath-MIR160a	MIR160
278	gma-miR164b	gma-MIR164b	MIR164
279	ath-miR164b-5p	ath-MIR164b	MIR164
280	gma-miR164b	gma-MIR164b	MIR164
281	ath-miR164c-5p	ath-MIR164c	MIR164
282	aly-miR165a-5p	aly-MIR165a	MIR166
283	ath-miR165a-5p	ath-MIR165a	MIR166
284	ath-miR166a-5p	ath-MIR166a	MIR166
285	ath-miR166a-5p	ath-MIR166a	MIR166
286	ath-miR166e-5p	ath-MIR166e	MIR166
287	bna-miR167d	bna-MIR167d	MIR167_1
288	osa-miR167d-5p	osa-MIR167d	MIR167_1
289	ath-miR167d	ath-MIR167d	MIR167_1
290	gma-miR168b	gma-MIR168b	MIR168
291	cme-miR168	cme-MIR168	MIR168
292	ath-miR168a-5p	ath-MIR168a	MIR168
293	gma-miR168b	gma-MIR168b	MIR168
294	cme-miR168	cme-MIR168	MIR168
295	ath-miR168a-5p	ath-MIR168a	MIR168
296	gma-miR169v	gma-MIR169v	MIR169_2
297	ath-miR169a-5p	ath-MIR169a	MIR169_2
298	gma-miR169e	gma-MIR169e	MIR169_6
299	vvi-miR169p	vvi-MIR169p	MIR169_2
300	ath-miR169f-5p	ath-MIR169f	MIR169_2
301	gma-miR169d	gma-MIR169d	MIR169_2
302	ath-miR171a-5p	ath-MIR171a	MIR171_1
303	ath-miR171c-5p	ath-MIR171c	MIR171_1
304	zma-miR171c-5p	zma-MIR171c	MIR171_1
305	ath-miR173-5p	ath-MIR173	MIR173
306	ath-miR1886.1	ath-MIR1886	-
307	ath-miR1886.2	ath-MIR1886	-
308	ath-miR1888a	ath-MIR1888a	MIR1888
309	ath-miR2111a-5p	ath-MIR2111a	MIR2111
310	ath-miR2112-5p	ath-MIR2112	MIR2112
311	ath-miR2934-5p	ath-MIR2934	MIR2934
312	ath-miR2936	ath-MIR2936	-
313	ath-miR3440b-5p	ath-MIR3440b	MIR3440
314	ath-miR390b-5p	ath-MIR390b	MIR390
315	gma-miR390e	gma-MIR390e	MIR390
316	atr-miR390.1	atr-MIR390	MIR390
317	ath-miR3932b-5p	ath-MIR3932b	MIR3932
318	ath-miR3933	ath-MIR3933	-
319	osa-miR393a	osa-MIR393a	MIR393
320	ath-miR393a-5p	ath-MIR393a	MIR393
321	osa-miR393a	osa-MIR393a	MIR393
322	ath-miR393a-5p	ath-MIR393a	MIR393
323	ath-miR394a	ath-MIR394a	MIR394
324	aly-miR395b-5p	aly-MIR395b	MIR395
325	aly-miR395h-5p	aly-MIR395h	MIR395
326	ath-miR397b	ath-MIR397b	MIR397
327	ath-miR398b-5p	ath-MIR398b	MIR398
328	aly-miR399a-5p	aly-MIR399a	MIR399
329	aly-miR399b-5p	aly-MIR399b	MIR399
330	ath-miR399c-5p	ath-MIR399c	MIR399
331	ath-miR400	ath-MIR400	MIR400
332	ath-miR403-5p	ath-MIR403	MIR403
333	ath-miR404	ath-MIR404	-
334	ath-miR413	ath-MIR413	-
335	ath-miR414	ath-MIR414	MIR414
336	ath-miR420	ath-MIR420	-
337	ath-miR4221	ath-MIR4221	MIR4221
338	ath-miR4227	ath-MIR4227	MIR4227
339	ath-miR4228-5p	ath-MIR4228	MIR4228
340	ath-miR4239	ath-MIR4239	MIR4239
341	aly-miR4240	aly-MIR4240	MIR4240
342	ath-miR4240	ath-MIR4240	MIR4240
343	ath-miR447c-5p	ath-MIR447c	MIR447
344	ath-miR5014a-5p	ath-MIR5014a	MIR5014
345	ath-miR5014b	ath-MIR5014b	MIR5014
346	ath-miR5020b	ath-MIR5020b	MIR5020
347	ath-miR5023	ath-MIR5023	-
348	ath-miR5024-5p	ath-MIR5024	-
349	ath-miR5025	ath-MIR5025	-
350	ath-miR5029	ath-MIR5029	-
351	ath-miR5595a	ath-MIR5595a	MIR5595
352	ath-miR5630a	ath-MIR5630a	MIR5630
353	ath-miR5630a	ath-MIR5630a	MIR5630
354	ath-miR5632-5p	ath-MIR5632	-
355	ath-miR5633	ath-MIR5633	-
356	ath-miR5637	ath-MIR5637	-
357	ath-miR5645a	ath-MIR5645a	MIR5645
358	ath-miR5652	ath-MIR5652	-
359	ath-miR5654-5p	ath-MIR5654	-
360	ath-miR5658	ath-MIR5658	-
361	ath-miR5661	ath-MIR5661	-
362	ath-miR5664	ath-MIR5664	-
363	ath-miR5996	ath-MIR5996	-
364	ath-miR5998a	ath-MIR5998a	MIR5998
365	ath-miR5999	ath-MIR5999	-
366	ath-miR771	ath-MIR771	MIR771
367	ath-miR774b-5p	ath-MIR774b	MIR774
368	ath-miR782	ath-MIR782	MIR2934
369	ath-miR8176	ath-MIR8176	-
370	ath-miR826b	ath-MIR826b	-
371	ath-miR833b	ath-MIR833b	-
372	ath-miR854b	ath-MIR854b	MIR854
373	ath-miR854b	ath-MIR854b	MIR854
374	ath-miR859	ath-MIR859	MIR859
375	aly-miR860-5p	aly-MIR860	MIR860
376	ath-miR861-5p	ath-MIR861	MIR861
377	ath-miR862-5p	ath-MIR862	MIR862
378	ath-miR864-5p	ath-MIR864	-
379	ath-miR867	ath-MIR867	-
380	ath-miR870-5p	ath-MIR870	-
381	zma-miR166c-5p	zma-MIR166c	MIR166
382	mtr-miR166e-5p	mtr-MIR166e	MIR166
383	sbi-miR169d-5p	sbi-MIR169d	MIR169_1
384	osa-miR169g	osa-MIR169g	MIR169_1
385	ath-miR390b-5p	ath-MIR390b	MIR390
386	gma-miR390e	gma-MIR390e	MIR390
387	atr-miR390.1	atr-MIR390	MIR390
388	atr-miR397b	atr-MIR397b	MIR397
389	vvi-miR828a	vvi-MIR828a	MIR828
390	atr-miR8565a	atr-MIR8565a	MIR8565
391	atr-miR8565e	atr-MIR8565e	MIR8565
392	atr-miR8577	atr-MIR8577	-
393	atr-miR8557	atr-MIR8557	-
394	atr-miR8583	atr-MIR8583	-
395	atr-miR8587	atr-MIR8587	-
396	gma-miR156g	gma-MIR156g	MIR156
397	aqc-miR156a	aqc-MIR156a	MIR156
398	hbr-miR156	hbr-MIR156	MIR156
399	ath-miR157b-5p	ath-MIR157b	MIR156
400	bgy-miR156	bgy-MIR156	MIR156
401	bdi-miR1127	bdi-MIR1127	MIR1122
402	ath-miR156c-5p	ath-MIR156c	MIR156
403	bna-miR156a	bna-MIR156a	MIR156
404	gma-miR156k	gma-MIR156k	MIR156
405	stu-miR156f-5p	stu-MIR156f	MIR156
406	ama-miR156	ama-MIR156	MIR156
407	ath-miR156c-5p	ath-MIR156c	MIR156
408	bna-miR156a	bna-MIR156a	MIR156
409	stu-miR156f-5p	stu-MIR156f	MIR156
410	ama-miR156	ama-MIR156	MIR156
411	ath-miR156c-5p	ath-MIR156c	MIR156
412	ath-miR156c-5p	ath-MIR156c	MIR156
413	bna-miR156a	bna-MIR156a	MIR156
414	aqc-miR529	aqc-MIR529	MIR529
415	ahy-miR156a	ahy-MIR156a	MIR156
416	sbi-miR156d	sbi-MIR156d	MIR156
417	bdi-miR159a-5p	bdi-MIR159a	MIR159
418	zma-miR159d-5p	zma-MIR159d	MIR159
419	gma-miR160c	gma-MIR160c	MIR160
420	ath-miR160a-5p	ath-MIR160a	MIR160
421	gma-miR160c	gma-MIR160c	MIR160
422	ath-miR160a-5p	ath-MIR160a	MIR160
423	zma-miR162-5p	zma-MIR162	MIR162_2
424	gma-miR164b	gma-MIR164b	MIR164
425	osa-miR164d	osa-MIR164d	MIR164
426	gma-miR164b	gma-MIR164b	MIR164
427	ath-miR164b-5p	ath-MIR164b	MIR164
428	bra-miR164e-5p	bra-MIR164e	MIR164
429	bdi-miR164f	bdi-MIR164f	MIR164
430	bdi-miR166a-5p	bdi-MIR166a	MIR166
431	bdi-miR166d-5p	bdi-MIR166d	MIR166
432	ata-miR5168-5p	ata-MIR5168	MIR166
433	bdi-miR166g-5p	bdi-MIR166g	MIR166
434	bdi-miR166h-5p	bdi-MIR166h	MIR166
435	bdi-miR166i-5p	bdi-MIR166i	MIR166
436	bna-miR167d	bna-MIR167d	MIR167_1
437	osa-miR167a-5p	osa-MIR167a	MIR167_1
438	bna-miR167d	bna-MIR167d	MIR167_1
439	osa-miR167d-5p	osa-MIR167d	MIR167_1
440	ctr-miR167	ctr-MIR167	MIR167_1
441	bna-miR167d	bna-MIR167d	MIR167_1
442	osa-miR167d-5p	osa-MIR167d	MIR167_1
443	ctr-miR167	ctr-MIR167	MIR167_1
444	bna-miR167d	bna-MIR167d	MIR167_1
445	osa-miR167d-5p	osa-MIR167d	MIR167_1
446	ctr-miR167	ctr-MIR167	MIR167_1
447	bna-miR167d	bna-MIR167d	MIR167_1
448	osa-miR167d-5p	osa-MIR167d	MIR167_1
449	ctr-miR167	ctr-MIR167	MIR167_1
450	zma-miR168b-5p	zma-MIR168b	MIR168
451	gma-miR169e	gma-MIR169e	MIR169_6
452	gma-miR169v	gma-MIR169v	MIR169_2
453	ath-miR169b-5p	ath-MIR169b	MIR169_2
454	sbi-miR169i	sbi-MIR169i	MIR169_1
455	bdi-miR169j-5p	bdi-MIR169j	MIR169_5
456	osa-miR169r-5p	osa-MIR169r	MIR169_1
457	bdi-miR169k-5p	bdi-MIR169k	MIR169_1
458	osa-miR169d	osa-MIR169d	MIR169_1
459	sbi-miR169d-5p	sbi-MIR169d	MIR169_1
460	osa-miR169g	osa-MIR169g	MIR169_1
461	bdi-miR171d-5p	bdi-MIR171d	MIR171_1
462	ata-miR171a-5p	ata-MIR171a	MIR171_2
463	zma-miR171h-5p	zma-MIR171h	MIR171_2
464	zma-miR172c-5p	zma-MIR172c	MIR172
465	bdi-miR172a-5p	bdi-MIR172a	MIR172
466	osa-miR2118j	osa-MIR2118j	MIR2118
467	bdi-miR319a	bdi-MIR319a	MIR159
468	bdi-miR319b-5p	bdi-MIR319b	MIR159
469	zma-miR319c-5p	zma-MIR319c	MIR159
470	ppe-miR393a	ppe-MIR393a	MIR393
471	osa-miR393a	osa-MIR393a	MIR393
472	ath-miR393a-5p	ath-MIR393a	MIR393
473	bdi-miR395l-5p	bdi-MIR395l	MIR395
474	bdi-miR395c-5p	bdi-MIR395c	MIR395
475	bdi-miR395g-5p	bdi-MIR395g	MIR395
476	bdi-miR395j-5p	bdi-MIR395j	MIR395
477	bdi-miR395l-5p	bdi-MIR395l	MIR395
478	bdi-miR395o-5p	bdi-MIR395o	MIR395
479	sbi-miR396d	sbi-MIR396d	MIR396
480	osa-miR396e-5p	osa-MIR396e	MIR396
481	osa-miR396f-5p	osa-MIR396f	MIR396
482	gma-miR396h	gma-MIR396h	MIR396
483	sbi-miR396b	sbi-MIR396b	MIR396
484	gma-miR396h	gma-MIR396h	MIR396
485	sbi-miR396b	sbi-MIR396b	MIR396
486	lus-miR397a	lus-MIR397a	MIR397
487	bdi-miR398b	bdi-MIR398b	MIR398
488	ata-miR399b-5p	ata-MIR399b	MIR399
489	bdi-miR408-5p	bdi-MIR408	MIR408
490	bdi-miR5055	bdi-MIR5055	-
491	bdi-miR5056	bdi-MIR5056	-
492	bdi-miR5058	bdi-MIR5058	-
493	bdi-miR5062a	bdi-MIR5062a	-
494	bdi-miR5066	bdi-MIR5066	-
495	bdi-miR5068	bdi-MIR5068	-
496	bdi-miR5069	bdi-MIR5069	-
497	bdi-miR5163b-5p	bdi-MIR5163b	MIR5163
498	bdi-miR5167a-5p	bdi-MIR5167a	MIR5167
499	bdi-miR5169b	bdi-MIR5169b	MIR5169
500	bdi-miR5172-5p	bdi-MIR5172	-
501	bdi-miR5173-5p	bdi-MIR5173	-
502	bdi-miR5174b-5p	bdi-MIR5174b	MIR5067
503	bdi-miR5174e-5p.2	bdi-MIR5174e	MIR5067
504	bdi-miR5174f	bdi-MIR5174f	MIR5067
505	bdi-miR5179	bdi-MIR5179	MIR5179
506	bdi-miR5180b	bdi-MIR5180b	MIR5067
507	bdi-miR5181a-5p	bdi-MIR5181a	MIR5067
508	bdi-miR5181c-5p	bdi-MIR5181c	MIR5067
509	bdi-miR5185d-5p	bdi-MIR5185d	MIR5185
510	bdi-miR5185d-5p	bdi-MIR5185d	MIR5185
511	bdi-miR5185d-5p	bdi-MIR5185d	MIR5185
512	bdi-miR5185d-5p	bdi-MIR5185d	MIR5185
513	bdi-miR5185d-5p	bdi-MIR5185d	MIR5185
514	bdi-miR5185d-5p	bdi-MIR5185d	MIR5185
515	bdi-miR5185m-5p	bdi-MIR5185m	MIR5185
516	bdi-miR5200b-5p	bdi-MIR5200b	MIR5200
517	sbi-miR528	sbi-MIR528	MIR528
518	zma-miR529-5p	zma-MIR529	MIR529
519	bdi-miR7708b-5p	bdi-MIR7708b	MIR7708
520	bdi-miR7711-5p.1	bdi-MIR7711	-
521	bdi-miR7713-5p	bdi-MIR7713	-
522	bdi-miR7715-5p	bdi-MIR7715	-
523	bdi-miR7716-5p	bdi-MIR7716	-
524	bdi-miR7717b-5p	bdi-MIR7717b	MIR7717
525	bdi-miR7717c-5p	bdi-MIR7717c	MIR7717
526	bdi-miR7718-5p	bdi-MIR7718	-
527	bdi-miR7720-5p	bdi-MIR7720	-
528	bdi-miR7723a-5p	bdi-MIR7723a	MIR7723
529	bdi-miR7725b-5p.1	bdi-MIR7725b	MIR7725
530	bdi-miR7725b-5p.2	bdi-MIR7725b	MIR7725
531	bdi-miR7726a-5p	bdi-MIR7726a	MIR7726
532	bdi-miR7728-5p	bdi-MIR7728	-
533	bdi-miR7729b-5p	bdi-MIR7729b	MIR7729
534	bdi-miR7731-5p	bdi-MIR7731	-
535	bdi-miR7733-5p	bdi-MIR7733	-
536	bdi-miR7739-5p	bdi-MIR7739	-
537	bdi-miR7742-5p	bdi-MIR7742	-
538	bdi-miR7743-5p	bdi-MIR7743	-
539	bdi-miR7744-5p	bdi-MIR7744	-
540	bdi-miR7745-5p	bdi-MIR7745	-
541	bdi-miR7748a-5p	bdi-MIR7748a	-
542	bdi-miR7749-5p	bdi-MIR7749	-
543	bdi-miR7750-5p	bdi-MIR7750	-
544	bdi-miR7752-5p	bdi-MIR7752	-
545	bdi-miR7753-5p	bdi-MIR7753	-
546	bdi-miR7754-5p	bdi-MIR7754	-
547	bdi-miR7755-5p	bdi-MIR7755	-
548	bdi-miR7756-5p	bdi-MIR7756	-
549	bdi-miR7758-5p	bdi-MIR7758	-
550	bdi-miR7760-5p	bdi-MIR7760	-
551	bdi-miR7761-5p	bdi-MIR7761	-
552	bdi-miR7762-5p	bdi-MIR7762	-
553	bdi-miR7763-5p	bdi-MIR7763	-
554	bdi-miR7768a-5p	bdi-MIR7768a	MIR7768
555	bdi-miR7769-5p	bdi-MIR7769	-
556	bdi-miR7770-5p	bdi-MIR7770	-
557	bdi-miR7771-5p	bdi-MIR7771	-
558	bdi-miR7772-5p	bdi-MIR7772	-
559	bdi-miR7774-5p	bdi-MIR7774	-
560	bdi-miR7775-5p	bdi-MIR7775	-
561	bdi-miR7776-5p.2	bdi-MIR7776	-
562	bdi-miR7776-5p.1	bdi-MIR7776	-
563	bdi-miR7777-5p.1	bdi-MIR7777	-
564	bdi-miR7777-5p.2	bdi-MIR7777	-
565	bdi-miR7778-5p	bdi-MIR7778	-
566	bdi-miR7779-5p	bdi-MIR7779	-
567	bdi-miR7781-5p	bdi-MIR7781	-
568	bdi-miR7782-5p	bdi-MIR7782	-
569	bdi-miR7783-5p	bdi-MIR7783	-
570	bdi-miR7786-5p	bdi-MIR7786	-
571	bdi-miR827-5p	bdi-MIR827	MIR827
572	bdi-miR845	bdi-MIR845	-
573	bdi-miR9480a	bdi-MIR9480a	-
574	bdi-miR9483a	bdi-MIR9483a	MIR9483
575	bdi-miR9484	bdi-MIR9484	-
576	bdi-miR9485	bdi-MIR9485	-
577	bdi-miR9488	bdi-MIR9488	-
578	bdi-miR9491	bdi-MIR9491	-
579	bdi-miR9496	bdi-MIR9496	-
580	gma-miR156g	gma-MIR156g	MIR156
581	aqc-miR156a	aqc-MIR156a	MIR156
582	hbr-miR156	hbr-MIR156	MIR156
583	ath-miR157b-5p	ath-MIR157b	MIR156
584	bgy-miR156	bgy-MIR156	MIR156
585	ath-miR156c-5p	ath-MIR156c	MIR156
586	bna-miR156a	bna-MIR156a	MIR156
587	aqc-miR156a	aqc-MIR156a	MIR156
588	hbr-miR156	hbr-MIR156	MIR156
589	ath-miR157b-5p	ath-MIR157b	MIR156
590	stu-miR156f-5p	stu-MIR156f	MIR156
591	ama-miR156	ama-MIR156	MIR156
592	ath-miR156c-5p	ath-MIR156c	MIR156
593	bna-miR156a	bna-MIR156a	MIR156
594	ath-miR156c-5p	ath-MIR156c	MIR156
595	bna-miR156a	bna-MIR156a	MIR156
596	gma-miR156k	gma-MIR156k	MIR156
597	gma-miR160c	gma-MIR160c	MIR160
598	ath-miR160a-5p	ath-MIR160a	MIR160
599	mes-miR160g	mes-MIR160g	MIR160
600	gma-miR160c	gma-MIR160c	MIR160
601	ath-miR160a-5p	ath-MIR160a	MIR160
602	gma-miR164b	gma-MIR164b	MIR164
603	ath-miR164b-5p	ath-MIR164b	MIR164
604	bra-miR164e-5p	bra-MIR164e	MIR164
605	gma-miR164b	gma-MIR164b	MIR164
606	ath-miR164c-5p	ath-MIR164c	MIR164
607	ath-miR166a-5p	ath-MIR166a	MIR166
608	ath-miR166e-5p	ath-MIR166e	MIR166
609	aly-miR165a-5p	aly-MIR165a	MIR166
610	ath-miR165a-5p	ath-MIR165a	MIR166
611	bna-miR167d	bna-MIR167d	MIR167_1
612	osa-miR167d-5p	osa-MIR167d	MIR167_1
613	sbi-miR169d-5p	sbi-MIR169d	MIR169_1
614	osa-miR169g	osa-MIR169g	MIR169_1
615	sbi-miR169d-5p	sbi-MIR169d	MIR169_1
616	osa-miR169g	osa-MIR169g	MIR169_1
617	sbi-miR169d-5p	sbi-MIR169d	MIR169_1
618	ath-miR169h	ath-MIR169h	MIR169_1
619	bna-miR169g	bna-MIR169g	MIR169_1
620	sbi-miR169d-5p	sbi-MIR169d	MIR169_1
621	ath-miR169h	ath-MIR169h	MIR169_1
622	bna-miR169g	bna-MIR169g	MIR169_1
623	sbi-miR169d-5p	sbi-MIR169d	MIR169_1
624	ath-miR169h	ath-MIR169h	MIR169_1
625	bna-miR169g	bna-MIR169g	MIR169_1
626	sbi-miR169d-5p	sbi-MIR169d	MIR169_1
627	ath-miR169h	ath-MIR169h	MIR169_1
628	bna-miR169g	bna-MIR169g	MIR169_1
629	sbi-miR169d-5p	sbi-MIR169d	MIR169_1
630	ath-miR169h	ath-MIR169h	MIR169_1
631	bna-miR169g	bna-MIR169g	MIR169_1
632	sbi-miR169d-5p	sbi-MIR169d	MIR169_1
633	ath-miR169h	ath-MIR169h	MIR169_1
634	bna-miR169g	bna-MIR169g	MIR169_1
635	aly-miR171b-5p	aly-MIR171b	MIR171_1
636	ath-miR171c-5p	ath-MIR171c	MIR171_1
637	zma-miR171c-5p	zma-MIR171c	MIR171_1
638	ath-miR171a-5p	ath-MIR171a	MIR171_1
639	bra-miR172d-5p	bra-MIR172d	MIR172
640	ath-miR2111a-5p	ath-MIR2111a	MIR2111
641	ath-miR2111a-5p	ath-MIR2111a	MIR2111
642	ath-miR390b-5p	ath-MIR390b	MIR390
643	gma-miR390e	gma-MIR390e	MIR390
644	atr-miR390.1	atr-MIR390	MIR390
645	ath-miR390b-5p	ath-MIR390b	MIR390
646	gma-miR390e	gma-MIR390e	MIR390
647	atr-miR390.1	atr-MIR390	MIR390
648	osa-miR393a	osa-MIR393a	MIR393
649	ath-miR393a-5p	ath-MIR393a	MIR393
650	ath-miR394a	ath-MIR394a	MIR394
651	aly-miR395g-5p	aly-MIR395g	MIR395
652	aly-miR395g-5p	aly-MIR395g	MIR395
653	hbr-miR396a	hbr-MIR396a	MIR396
654	osa-miR396c-5p	osa-MIR396c	MIR396
655	nta-miR397	nta-MIR397	MIR397
656	osa-miR397a	osa-MIR397a	MIR397
657	bna-miR397a	bna-MIR397a	MIR397
658	aly-miR399h-5p	aly-MIR399h	MIR399
659	bra-miR403-5p	bra-MIR403	MIR403
660	bra-miR6032-5p	bra-MIR6032	MIR6032
661	bna-miR6032	bna-MIR6032	MIR6032
662	bna-miR6035	bna-MIR6035	-
663	bol-miR824	bol-MIR824	MIR824
664	aqc-miR156a	aqc-MIR156a	MIR156
665	hbr-miR156	hbr-MIR156	MIR156
666	ath-miR157b-5p	ath-MIR157b	MIR156
667	zma-miR172b-5p	zma-MIR172b	MIR172
668	gma-miR172g	gma-MIR172g	MIR172
669	stu-miR172b-5p	stu-MIR172b	MIR172
670	bol-miR398a-5p	bol-MIR398a	MIR398
671	bol-miR824	bol-MIR824	MIR824
672	ath-miR156c-5p	ath-MIR156c	MIR156
673	bna-miR156a	bna-MIR156a	MIR156
674	ath-miR156c-5p	ath-MIR156c	MIR156
675	bna-miR156a	bna-MIR156a	MIR156
676	stu-miR156f-5p	stu-MIR156f	MIR156
677	ama-miR156	ama-MIR156	MIR156
678	ath-miR156c-5p	ath-MIR156c	MIR156
679	bna-miR156a	bna-MIR156a	MIR156
680	stu-miR156f-5p	stu-MIR156f	MIR156
681	ama-miR156	ama-MIR156	MIR156
682	ath-miR156c-5p	ath-MIR156c	MIR156
683	gma-miR156q	gma-MIR156q	MIR156
684	gma-miR160c	gma-MIR160c	MIR160
685	ath-miR160a-5p	ath-MIR160a	MIR160
686	mes-miR160g	mes-MIR160g	MIR160
687	aly-miR162a-5p	aly-MIR162a	MIR162_1
688	gma-miR164b	gma-MIR164b	MIR164
689	ath-miR164b-5p	ath-MIR164b	MIR164
690	bra-miR164e-5p	bra-MIR164e	MIR164
691	gma-miR164b	gma-MIR164b	MIR164
692	ath-miR164c-5p	ath-MIR164c	MIR164
693	gma-miR164b	gma-MIR164b	MIR164
694	ath-miR164c-5p	ath-MIR164c	MIR164
695	gma-miR168b	gma-MIR168b	MIR168
696	cme-miR168	cme-MIR168	MIR168
697	ath-miR168a-5p	ath-MIR168a	MIR168
698	gma-miR168b	gma-MIR168b	MIR168
699	cme-miR168	cme-MIR168	MIR168
700	bra-miR168b-5p	bra-MIR168b	MIR168
701	gma-miR168b	gma-MIR168b	MIR168
702	cme-miR168	cme-MIR168	MIR168
703	bra-miR168b-5p	bra-MIR168b	MIR168
704	aly-miR171b-5p	aly-MIR171b	MIR171_1
705	aly-miR171b-5p	aly-MIR171b	MIR171_1
706	zma-miR172b-5p	zma-MIR172b	MIR172
707	gma-miR172g	gma-MIR172g	MIR172
708	stu-miR172b-5p	stu-MIR172b	MIR172
709	bra-miR172c-5p	bra-MIR172c	MIR172
710	bra-miR172d-5p	bra-MIR172d	MIR172
711	bra-miR2111-5p	bra-MIR2111	MIR2111
712	aly-miR319a-5p	aly-MIR319a	MIR159
713	aly-miR391-5p	aly-MIR391	MIR391
714	aly-miR395g-5p	aly-MIR395g	MIR395
715	aly-miR395g-5p	aly-MIR395g	MIR395
716	bra-miR5715	bra-MIR5715	-
717	bra-miR5717	bra-MIR5717	-
718	bra-miR5721	bra-MIR5721	-
719	bol-miR824	bol-MIR824	MIR824
720	bra-miR860-5p	bra-MIR860	MIR860
721	bra-miR9552a-5p	bra-MIR9552a	MIR9552
722	bra-miR9554-5p	bra-MIR9554	-
723	bra-miR9560a-5p	bra-MIR9560a	MIR9560
724	bra-miR9560a-5p	bra-MIR9560a	MIR9560
725	bra-miR9561-5p	bra-MIR9561	-
726	bra-miR9565-5p	bra-MIR9565	-
727	bra-miR9568-5p	bra-MIR9568	-
728	stu-miR156f-5p	stu-MIR156f	MIR156
729	ama-miR156	ama-MIR156	MIR156
730	ath-miR156c-5p	ath-MIR156c	MIR156
731	bna-miR156a	bna-MIR156a	MIR156
732	cme-miR156j	cme-MIR156j	MIR156
733	ath-miR156c-5p	ath-MIR156c	MIR156
734	bna-miR156a	bna-MIR156a	MIR156
735	gma-miR156k	gma-MIR156k	MIR156
736	ath-miR156c-5p	ath-MIR156c	MIR156
737	bna-miR156a	bna-MIR156a	MIR156
738	ath-miR156h	ath-MIR156h	MIR156
739	smo-miR156c	smo-MIR156c	MIR156
740	far-miR529	far-MIR529	-
741	ahy-miR156a	ahy-MIR156a	MIR156
742	sbi-miR156d	sbi-MIR156d	MIR156
743	far-miR156b	far-MIR156b	MIR156
744	gma-miR156f	gma-MIR156f	MIR156
745	gma-miR156g	gma-MIR156g	MIR156
746	aqc-miR156a	aqc-MIR156a	MIR156
747	hbr-miR156	hbr-MIR156	MIR156
748	ath-miR157b-5p	ath-MIR157b	MIR156
749	ath-miR157c-3p	ath-MIR157c	MIR156
750	aqc-miR156a	aqc-MIR156a	MIR156
751	hbr-miR156	hbr-MIR156	MIR156
752	ath-miR157b-5p	ath-MIR157b	MIR156
753	ath-miR158a-5p	ath-MIR158a	MIR158
754	aly-miR158b-5p	aly-MIR158b	MIR158
755	aly-miR159b-5p	aly-MIR159b	MIR159
756	gma-miR160c	gma-MIR160c	MIR160
757	ath-miR160a-5p	ath-MIR160a	MIR160
758	aly-miR162a-5p	aly-MIR162a	MIR162_1
759	aly-miR165a-5p	aly-MIR165a	MIR166
760	ath-miR165a-5p	ath-MIR165a	MIR166
761	aly-miR165b-5p	aly-MIR165b	MIR166
762	zma-miR166c-5p	zma-MIR166c	MIR166
763	ath-miR166e-5p	ath-MIR166e	MIR166
764	bna-miR167d	bna-MIR167d	MIR167_1
765	osa-miR167a-5p	osa-MIR167a	MIR167_1
766	gma-miR169v	gma-MIR169v	MIR169_2
767	ath-miR169a-5p	ath-MIR169a	MIR169_2
768	sbi-miR169d-5p	sbi-MIR169d	MIR169_1
769	ath-miR169h	ath-MIR169h	MIR169_1
770	bna-miR169g	bna-MIR169g	MIR169_1
771	sbi-miR169d-5p	sbi-MIR169d	MIR169_1
772	ath-miR169h	ath-MIR169h	MIR169_1
773	gma-miR169e	gma-MIR169e	MIR169_6
774	vvi-miR169p	vvi-MIR169p	MIR169_2
775	ath-miR169f-5p	ath-MIR169f	MIR169_2
776	gma-miR169d	gma-MIR169d	MIR169_2
777	ath-miR171a-5p	ath-MIR171a	MIR171_1
778	ath-miR171c-5p	ath-MIR171c	MIR171_1
779	zma-miR171c-5p	zma-MIR171c	MIR171_1
780	bra-miR172b-5p	bra-MIR172b	MIR172
781	ath-miR2111a-5p	ath-MIR2111a	MIR2111
782	aly-miR319a-5p	aly-MIR319a	MIR159
783	aly-miR319d-5p	aly-MIR319d	MIR159
784	ath-miR390b-5p	ath-MIR390b	MIR390
785	gma-miR390e	gma-MIR390e	MIR390
786	atr-miR390.1	atr-MIR390	MIR390
787	ath-miR394a	ath-MIR394a	MIR394
788	nta-miR397	nta-MIR397	MIR397
789	osa-miR397a	osa-MIR397a	MIR397
790	bna-miR397a	bna-MIR397a	MIR397
791	aly-miR825-5p	aly-MIR825	MIR825
792	aly-miR828-3p	aly-MIR828	MIR828
793	stu-miR156f-5p	stu-MIR156f	MIR156
794	cca-miR156b	cca-MIR156b	MIR156
795	ptc-miR160g	ptc-MIR160g	MIR160
796	cca-miR164	cca-MIR164	MIR164
797	gma-miR168b	gma-MIR168b	MIR168
798	cme-miR168	cme-MIR168	MIR168
799	ath-miR168a-5p	ath-MIR168a	MIR168
800	cca-miR169b	cca-MIR169b	MIR169_1
801	cca-miR390	cca-MIR390	MIR390
802	zma-miR396h	zma-MIR396h	MIR396
803	osa-miR396c-5p	osa-MIR396c	MIR396
804	cca-miR6103-5p	cca-MIR6103	-
805	cca-miR6108a	cca-MIR6108a	MIR6108
806	cca-miR6108e-5p	cca-MIR6108e	MIR6108
807	cca-miR6108f	cca-MIR6108f	MIR6108
808	cca-miR6110-5p	cca-MIR6110	-
809	cca-miR6111-5p	cca-MIR6111	-
810	cca-miR6114-5p	cca-MIR6114	-
811	cca-miR6115	cca-MIR6115	-
812	cca-miR6116-5p	cca-MIR6116	-
813	cca-miR6117	cca-MIR6117	-
814	bna-miR167d	bna-MIR167d	MIR167_1
815	osa-miR167d-5p	osa-MIR167d	MIR167_1
816	ctr-miR167	ctr-MIR167	MIR167_1
817	gma-miR164b	gma-MIR164b	MIR164
818	ath-miR164c-5p	ath-MIR164c	MIR164
819	ath-miR156c-5p	ath-MIR156c	MIR156
820	bna-miR156a	bna-MIR156a	MIR156
821	ath-miR156c-5p	ath-MIR156c	MIR156
822	gma-miR156k	gma-MIR156k	MIR156
823	gma-miR156g	gma-MIR156g	MIR156
824	gma-miR156e	gma-MIR156e	MIR156
825	aqc-miR156a	aqc-MIR156a	MIR156
826	gma-miR160c	gma-MIR160c	MIR160
827	ath-miR160a-5p	ath-MIR160a	MIR160
828	mes-miR160h	mes-MIR160h	MIR160
829	gma-miR160c	gma-MIR160c	MIR160
830	ath-miR160a-5p	ath-MIR160a	MIR160
831	mes-miR160h	mes-MIR160h	MIR160
832	gma-miR160c	gma-MIR160c	MIR160
833	ath-miR160a-5p	ath-MIR160a	MIR160
834	mes-miR160h	mes-MIR160h	MIR160
835	gma-miR164b	gma-MIR164b	MIR164
836	ath-miR164b-5p	ath-MIR164b	MIR164
837	bra-miR164e-5p	bra-MIR164e	MIR164
838	zma-miR166c-5p	zma-MIR166c	MIR166
839	zma-miR166c-5p	zma-MIR166c	MIR166
840	aly-miR166g-5p	aly-MIR166g	MIR166
841	gra-miR166d	gra-MIR166d	MIR166
842	mtr-miR166e-5p	mtr-MIR166e	MIR166
843	bna-miR167d	bna-MIR167d	MIR167_1
844	osa-miR167d-5p	osa-MIR167d	MIR167_1
845	ctr-miR167	ctr-MIR167	MIR167_1
846	cme-miR167e	cme-MIR167e	MIR167_1
847	gma-miR168b	gma-MIR168b	MIR168
848	cme-miR168	cme-MIR168	MIR168
849	ath-miR168a-5p	ath-MIR168a	MIR168
850	aly-miR169n-5p	aly-MIR169n	MIR169_1
851	gma-miR169e	gma-MIR169e	MIR169_6
852	gma-miR169v	gma-MIR169v	MIR169_2
853	ath-miR169b-5p	ath-MIR169b	MIR169_2
854	gma-miR169e	gma-MIR169e	MIR169_6
855	gma-miR169v	gma-MIR169v	MIR169_2
856	ath-miR169b-5p	ath-MIR169b	MIR169_2
857	ptc-miR169s	ptc-MIR169s	MIR169_2
858	cme-miR169j	cme-MIR169j	MIR169_1
859	cme-miR169k	cme-MIR169k	MIR169_2
860	ptc-miR169t	ptc-MIR169t	MIR169_3
861	cme-miR169t	cme-MIR169t	-
862	ptc-miR169t	ptc-MIR169t	MIR169_3
863	cme-miR169t	cme-MIR169t	-
864	stu-miR172c-5p	stu-MIR172c	MIR172
865	zma-miR172b-5p	zma-MIR172b	MIR172
866	gma-miR172g	gma-MIR172g	MIR172
867	stu-miR172b-5p	stu-MIR172b	MIR172
868	ath-miR2111a-5p	ath-MIR2111a	MIR2111
869	ath-miR2111a-5p	ath-MIR2111a	MIR2111
870	mtr-miR319a-5p	mtr-MIR319a	MIR159
871	ath-miR390b-5p	ath-MIR390b	MIR390
872	gma-miR390e	gma-MIR390e	MIR390
873	atr-miR390.1	atr-MIR390	MIR390
874	ath-miR390b-5p	ath-MIR390b	MIR390
875	gma-miR390e	gma-MIR390e	MIR390
876	atr-miR390.1	atr-MIR390	MIR390
877	ppe-miR393a	ppe-MIR393a	MIR393
878	osa-miR393a	osa-MIR393a	MIR393
879	ath-miR393a-5p	ath-MIR393a	MIR393
880	ath-miR394a	ath-MIR394a	MIR394
881	ath-miR394a	ath-MIR394a	MIR394
882	osa-miR396c-5p	osa-MIR396c	MIR396
883	gma-miR396h	gma-MIR396h	MIR396
884	sbi-miR396b	sbi-MIR396b	MIR396
885	osa-miR396c-5p	osa-MIR396c	MIR396
886	hbr-miR396a	hbr-MIR396a	MIR396
887	osa-miR396c-5p	osa-MIR396c	MIR396
888	mdm-miR396f	mdm-MIR396f	MIR396
889	nta-miR397	nta-MIR397	MIR397
890	osa-miR397a	osa-MIR397a	MIR397
891	bna-miR397a	bna-MIR397a	MIR397
892	cme-miR399g	cme-MIR399g	MIR399
893	cme-miR477a	cme-MIR477a	-
894	cme-miR7130	cme-MIR7130	-
895	cme-miR854	cme-MIR854	-
896	ath-miR156c-5p	ath-MIR156c	MIR156
897	bna-miR156a	bna-MIR156a	MIR156
898	ath-miR156c-5p	ath-MIR156c	MIR156
899	bna-miR156a	bna-MIR156a	MIR156
900	gma-miR156g	gma-MIR156g	MIR156
901	aqc-miR156a	aqc-MIR156a	MIR156
902	hbr-miR156	hbr-MIR156	MIR156
903	ath-miR157b-5p	ath-MIR157b	MIR156
904	cpa-miR8135	cpa-MIR8135	-
905	gma-miR160c	gma-MIR160c	MIR160
906	ath-miR160a-5p	ath-MIR160a	MIR160
907	osa-miR160f-5p	osa-MIR160f	MIR160
908	vvi-miR160a	vvi-MIR160a	MIR160
909	gma-miR160c	gma-MIR160c	MIR160
910	ath-miR160a-5p	ath-MIR160a	MIR160
911	mes-miR160h	mes-MIR160h	MIR160
912	gma-miR164b	gma-MIR164b	MIR164
913	ath-miR164b-5p	ath-MIR164b	MIR164
914	cpa-miR164d	cpa-MIR164d	MIR164_3
915	zma-miR166c-5p	zma-MIR166c	MIR166
916	gma-miR166i-5p	gma-MIR166i	MIR166
917	aly-miR166g-5p	aly-MIR166g	MIR166
918	mtr-miR166e-5p	mtr-MIR166e	MIR166
919	bna-miR167d	bna-MIR167d	MIR167_1
920	osa-miR167a-5p	osa-MIR167a	MIR167_1
921	bna-miR167d	bna-MIR167d	MIR167_1
922	osa-miR167d-5p	osa-MIR167d	MIR167_1
923	ctr-miR167	ctr-MIR167	MIR167_1
924	osa-miR171f-5p	osa-MIR171f	MIR171_1
925	ath-miR390b-5p	ath-MIR390b	MIR390
926	gma-miR390e	gma-MIR390e	MIR390
927	ath-miR394a	ath-MIR394a	MIR394
928	gma-miR396h	gma-MIR396h	MIR396
929	sbi-miR396b	sbi-MIR396b	MIR396
930	cpa-miR398	cpa-MIR398	MIR398
931	ppt-miR535c	ppt-MIR535c	MIR535
932	cpa-miR8137	cpa-MIR8137	-
933	cpa-miR8139a	cpa-MIR8139a	MIR8139
934	cpa-miR8139a	cpa-MIR8139a	MIR8139
935	cpa-miR8139a	cpa-MIR8139a	MIR8139
936	cpa-miR8139a	cpa-MIR8139a	MIR8139
937	cpa-miR8139a	cpa-MIR8139a	MIR8139
938	cpa-miR8140	cpa-MIR8140	-
939	cpa-miR8143	cpa-MIR8143	-
940	cpa-miR8146	cpa-MIR8146	-
941	cre-miR1142	cre-MIR1142	-
942	cre-miR1144b	cre-MIR1144b	MIR1144
943	cre-miR1147.1	cre-MIR1147	-
944	cre-miR1147.2	cre-MIR1147	-
945	cre-miR1151a-5p	cre-MIR1151a	MIR1151
946	cre-miR1157-5p	cre-MIR1157	-
947	cre-miR1162-5p	cre-MIR1162	-
948	cre-miR1164	cre-MIR1164	-
949	cre-miR1171	cre-MIR1171	-
950	cre-miR1171	cre-MIR1171	-
951	cre-miR1171	cre-MIR1171	-
952	cre-miR905-5p	cre-MIR905	-
953	cre-miR906-5p	cre-MIR906	-
954	cre-miR919.2	cre-MIR919	MIR918
955	gma-miR160c	gma-MIR160c	MIR160
956	ath-miR160a-5p	ath-MIR160a	MIR160
957	mes-miR160h	mes-MIR160h	MIR160
958	gma-miR164b	gma-MIR164b	MIR164
959	ath-miR164b-5p	ath-MIR164b	MIR164
960	gma-miR164b	gma-MIR164b	MIR164
961	ath-miR164b-5p	ath-MIR164b	MIR164
962	bra-miR164e-5p	bra-MIR164e	MIR164
963	gma-miR164b	gma-MIR164b	MIR164
964	ath-miR164b-5p	ath-MIR164b	MIR164
965	bra-miR164e-5p	bra-MIR164e	MIR164
966	gma-miR164b	gma-MIR164b	MIR164
967	ath-miR164b-5p	ath-MIR164b	MIR164
968	bra-miR164e-5p	bra-MIR164e	MIR164
969	zma-miR166c-5p	zma-MIR166c	MIR166
970	aly-miR166g-5p	aly-MIR166g	MIR166
971	gra-miR166d	gra-MIR166d	MIR166
972	bna-miR167d	bna-MIR167d	MIR167_1
973	osa-miR167d-5p	osa-MIR167d	MIR167_1
974	ctr-miR167	ctr-MIR167	MIR167_1
975	gra-miR167c	gra-MIR167c	MIR167_1
976	bna-miR167d	bna-MIR167d	MIR167_1
977	ptc-miR167f-5p	ptc-MIR167f	MIR167_1
978	mdm-miR167h	mdm-MIR167h	MIR167_1
979	bna-miR167d	bna-MIR167d	MIR167_1
980	osa-miR167a-5p	osa-MIR167a	MIR167_1
981	sbi-miR169d-5p	sbi-MIR169d	MIR169_1
982	ath-miR169h	ath-MIR169h	MIR169_1
983	bna-miR169g	bna-MIR169g	MIR169_1
984	sbi-miR169d-5p	sbi-MIR169d	MIR169_1
985	ath-miR169h	ath-MIR169h	MIR169_1
986	bna-miR169g	bna-MIR169g	MIR169_1
987	sbi-miR169d-5p	sbi-MIR169d	MIR169_1
988	ath-miR169h	ath-MIR169h	MIR169_1
989	bna-miR169g	bna-MIR169g	MIR169_1
990	sbi-miR169d-5p	sbi-MIR169d	MIR169_1
991	nta-miR169t	nta-MIR169t	MIR169_1
992	gma-miR169e	gma-MIR169e	MIR169_6
993	gma-miR169v	gma-MIR169v	MIR169_2
994	ath-miR169b-5p	ath-MIR169b	MIR169_2
995	sbi-miR169d-5p	sbi-MIR169d	MIR169_1
996	ath-miR169h	ath-MIR169h	MIR169_1
997	gma-miR169e	gma-MIR169e	MIR169_6
998	gma-miR169v	gma-MIR169v	MIR169_2
999	ath-miR169b-5p	ath-MIR169b	MIR169_2
1000	gma-miR169e	gma-MIR169e	MIR169_6
1001	gma-miR169v	gma-MIR169v	MIR169_2
1002	ath-miR169b-5p	ath-MIR169b	MIR169_2
1003	gma-miR169e	gma-MIR169e	MIR169_6
1004	gma-miR169v	gma-MIR169v	MIR169_2
1005	ath-miR169b-5p	ath-MIR169b	MIR169_2
1006	sbi-miR169d-5p	sbi-MIR169d	MIR169_1
1007	nta-miR169t	nta-MIR169t	MIR169_1
1008	ath-miR171c-5p	ath-MIR171c	MIR171_1
1009	csi-miR172a-5p	csi-MIR172a	MIR172
1010	ptc-miR2111a	ptc-MIR2111a	MIR2111
1011	ath-miR390b-5p	ath-MIR390b	MIR390
1012	gma-miR390e	gma-MIR390e	MIR390
1013	atr-miR390.1	atr-MIR390	MIR390
1014	osa-miR393a	osa-MIR393a	MIR393
1015	zma-miR393a-5p	zma-MIR393a	MIR393
1016	ata-miR393-5p	ata-MIR393	MIR393
1017	osa-miR393a	osa-MIR393a	MIR393
1018	ath-miR393a-5p	ath-MIR393a	MIR393
1019	csi-miR3946	csi-MIR3946	-
1020	ath-miR394a	ath-MIR394a	MIR394
1021	gma-miR396h	gma-MIR396h	MIR396
1022	sbi-miR396b	sbi-MIR396b	MIR396
1023	gma-miR396e	gma-MIR396e	MIR396
1024	gma-miR396h	gma-MIR396h	MIR396
1025	sbi-miR396b	sbi-MIR396b	MIR396
1026	lus-miR397a	lus-MIR397a	MIR397
1027	osa-miR397a	osa-MIR397a	MIR397
1028	nta-miR477a	nta-MIR477a	MIR477
1029	mes-miR477b	mes-MIR477b	MIR477
1030	stu-miR530	stu-MIR530	MIR530
1031	ptc-miR530a	ptc-MIR530a	MIR530
1032	ptc-miR530b	ptc-MIR530b	MIR530
1033	gma-miR164b	gma-MIR164b	MIR164
1034	ath-miR164b-5p	ath-MIR164b	MIR164
1035	bna-miR167d	bna-MIR167d	MIR167_1
1036	osa-miR167d-5p	osa-MIR167d	MIR167_1
1037	ctr-miR167	ctr-MIR167	MIR167_1
1038	ath-miR156c-5p	ath-MIR156c	MIR156
1039	bna-miR156a	bna-MIR156a	MIR156
1040	bna-miR167d	bna-MIR167d	MIR167_1
1041	osa-miR167a-5p	osa-MIR167a	MIR167_1
1042	ptc-miR397b	ptc-MIR397b	MIR397
1043	aly-miR162a-5p	aly-MIR162a	MIR162_1
1044	bna-miR167d	bna-MIR167d	MIR167_1
1045	osa-miR167d-5p	osa-MIR167d	MIR167_1
1046	ctr-miR167	ctr-MIR167	MIR167_1
1047	gma-miR172b-5p	gma-MIR172b	MIR172
1048	mtr-miR172c-5p	mtr-MIR172c	MIR172
1049	ppt-miR535c	ppt-MIR535c	MIR535
1050	zma-miR159a-5p	zma-MIR159a	MIR159
1051	far-miR164a	far-MIR164a	MIR164_2
1052	far-miR164a	far-MIR164a	MIR164_2
1053	sbi-miR396d	sbi-MIR396d	MIR396
1054	osa-miR396e-5p	osa-MIR396e	MIR396
1055	osa-miR396f-5p	osa-MIR396f	MIR396
1056	aqc-miR477e	aqc-MIR477e	MIR477
1057	cme-miR156j	cme-MIR156j	MIR156
1058	ath-miR156c-5p	ath-MIR156c	MIR156
1059	bna-miR156a	bna-MIR156a	MIR156
1060	gma-miR156k	gma-MIR156k	MIR156
1061	cme-miR156j	cme-MIR156j	MIR156
1062	ath-miR156c-5p	ath-MIR156c	MIR156
1063	bna-miR156a	bna-MIR156a	MIR156
1064	gma-miR156k	gma-MIR156k	MIR156
1065	gma-miR156g	gma-MIR156g	MIR156
1066	aqc-miR156a	aqc-MIR156a	MIR156
1067	hbr-miR156	hbr-MIR156	MIR156
1068	ath-miR157b-5p	ath-MIR157b	MIR156
1069	gma-miR156g	gma-MIR156g	MIR156
1070	aqc-miR156a	aqc-MIR156a	MIR156
1071	gma-miR160c	gma-MIR160c	MIR160
1072	ath-miR160a-5p	ath-MIR160a	MIR160
1073	mes-miR160h	mes-MIR160h	MIR160
1074	aly-miR162a-5p	aly-MIR162a	MIR162_1
1075	gma-miR164b	gma-MIR164b	MIR164
1076	ath-miR164b-5p	ath-MIR164b	MIR164
1077	bra-miR164e-5p	bra-MIR164e	MIR164
1078	mtr-miR164d	mtr-MIR164d	MIR164
1079	zma-miR166c-5p	zma-MIR166c	MIR166
1080	bna-miR167d	bna-MIR167d	MIR167_1
1081	osa-miR167a-5p	osa-MIR167a	MIR167_1
1082	bna-miR167d	bna-MIR167d	MIR167_1
1083	lus-miR167a	lus-MIR167a	MIR167_1
1084	gma-miR168b	gma-MIR168b	MIR168
1085	cme-miR168	cme-MIR168	MIR168
1086	ath-miR168a-5p	ath-MIR168a	MIR168
1087	sbi-miR169d-5p	sbi-MIR169d	MIR169_1
1088	ath-miR169h	ath-MIR169h	MIR169_1
1089	bna-miR169g	bna-MIR169g	MIR169_1
1090	sbi-miR169d-5p	sbi-MIR169d	MIR169_1
1091	ath-miR169h	ath-MIR169h	MIR169_1
1092	bna-miR169g	bna-MIR169g	MIR169_1
1093	sbi-miR169d-5p	sbi-MIR169d	MIR169_1
1094	ath-miR169h	ath-MIR169h	MIR169_1
1095	bna-miR169g	bna-MIR169g	MIR169_1
1096	ath-miR171c-5p	ath-MIR171c	MIR171_1
1097	zma-miR171c-5p	zma-MIR171c	MIR171_1
1098	gma-miR171l	gma-MIR171l	MIR171_1
1099	ath-miR2111a-5p	ath-MIR2111a	MIR2111
1100	ath-miR2111a-5p	ath-MIR2111a	MIR2111
1101	ath-miR390b-5p	ath-MIR390b	MIR390
1102	gma-miR390e	gma-MIR390e	MIR390
1103	atr-miR390.1	atr-MIR390	MIR390
1104	ppe-miR393a	ppe-MIR393a	MIR393
1105	osa-miR393a	osa-MIR393a	MIR393
1106	ath-miR393a-5p	ath-MIR393a	MIR393
1107	ath-miR394a	ath-MIR394a	MIR394
1108	gma-miR396h	gma-MIR396h	MIR396
1109	sbi-miR396b	sbi-MIR396b	MIR396
1110	gma-miR396h	gma-MIR396h	MIR396
1111	sbi-miR396b	sbi-MIR396b	MIR396
1112	gma-miR396e	gma-MIR396e	MIR396
1113	lus-miR397a	lus-MIR397a	MIR397
1114	osa-miR397a	osa-MIR397a	MIR397
1115	mes-miR477d	mes-MIR477d	MIR477
1116	ppe-miR5225-5p	ppe-MIR5225	MIR5225
1117	stu-miR530	stu-MIR530	MIR530
1118	tcc-miR530a	tcc-MIR530a	MIR530
1119	ath-miR156c-5p	ath-MIR156c	MIR156
1120	bna-miR156a	bna-MIR156a	MIR156
1121	ghr-miR156c	ghr-MIR156c	MIR156
1122	gma-miR160c	gma-MIR160c	MIR160
1123	ath-miR160a-5p	ath-MIR160a	MIR160
1124	mes-miR160h	mes-MIR160h	MIR160
1125	aly-miR162a-5p	aly-MIR162a	MIR162_1
1126	gma-miR164b	gma-MIR164b	MIR164
1127	ath-miR164b-5p	ath-MIR164b	MIR164
1128	bra-miR164e-5p	bra-MIR164e	MIR164
1129	sbi-miR169d-5p	sbi-MIR169d	MIR169_1
1130	ath-miR169h	ath-MIR169h	MIR169_1
1131	bna-miR169g	bna-MIR169g	MIR169_1
1132	ptc-miR172b-5p	ptc-MIR172b	MIR172
1133	mes-miR2950	mes-MIR2950	-
1134	ghr-miR3476-5p	ghr-MIR3476	-
1135	osa-miR393a	osa-MIR393a	MIR393
1136	zma-miR393a-5p	zma-MIR393a	MIR393
1137	ath-miR394a	ath-MIR394a	MIR394
1138	vvi-miR394c	vvi-MIR394c	MIR394
1139	gma-miR396h	gma-MIR396h	MIR396
1140	sbi-miR396b	sbi-MIR396b	MIR396
1141	gma-miR396h	gma-MIR396h	MIR396
1142	sbi-miR396b	sbi-MIR396b	MIR396
1143	ghr-miR7484b	ghr-MIR7484b	MIR7484
1144	ghr-miR7486a	ghr-MIR7486a	MIR7486
1145	ghr-miR7489	ghr-MIR7489	-
1146	ghr-miR7491	ghr-MIR7491	-
1147	ghr-miR7499	ghr-MIR7499	-
1148	ghr-miR7503	ghr-MIR7503	-
1149	ghr-miR7505	ghr-MIR7505	-
1150	ghr-miR7507	ghr-MIR7507	-
1151	ghr-miR7510a	ghr-MIR7510a	MIR7510
1152	ghr-miR7510b	ghr-MIR7510b	MIR7510
1153	ghr-miR7511	ghr-MIR7511	-
1154	gra-miR827b	gra-MIR827b	MIR827_2
1155	gra-miR827b	gra-MIR827b	MIR827_2
1156	gma-miR1507c-5p	gma-MIR1507c	-
1157	gma-miR1509a	gma-MIR1509a	MIR1509
1158	gma-miR1509b	gma-MIR1509b	MIR1509
1159	gma-miR1510b-5p	gma-MIR1510b	MIR1510
1160	gma-miR1512b	gma-MIR1512b	MIR1512
1161	gma-miR1512c	gma-MIR1512c	MIR1512
1162	gma-miR1513c	gma-MIR1513c	MIR1513
1163	gma-miR1513a-5p	gma-MIR1513a	MIR1513
1164	gma-miR1514b-5p	gma-MIR1514b	MIR1514
1165	gma-miR1516c	gma-MIR1516c	-
1166	gma-miR1518	gma-MIR1518	-
1167	gma-miR1519	gma-MIR1519	-
1168	gma-miR1520f-5p	gma-MIR1520f	MIR1520
1169	gma-miR1522	gma-MIR1522	-
1170	gma-miR1531-5p	gma-MIR1531	-
1171	stu-miR156f-5p	stu-MIR156f	MIR156
1172	ama-miR156	ama-MIR156	MIR156
1173	ath-miR156c-5p	ath-MIR156c	MIR156
1174	bna-miR156a	bna-MIR156a	MIR156
1175	aqc-miR529	aqc-MIR529	MIR529
1176	ahy-miR156a	ahy-MIR156a	MIR156
1177	sbi-miR156d	sbi-MIR156d	MIR156
1178	far-miR156b	far-MIR156b	MIR156
1179	gma-miR156f	gma-MIR156f	MIR156
1180	gma-miR156g	gma-MIR156g	MIR156
1181	aqc-miR156a	aqc-MIR156a	MIR156
1182	hbr-miR156	hbr-MIR156	MIR156
1183	ath-miR157b-5p	ath-MIR157b	MIR156
1184	gma-miR156e	gma-MIR156e	MIR156
1185	aqc-miR156a	aqc-MIR156a	MIR156
1186	aqc-miR529	aqc-MIR529	MIR529
1187	ahy-miR156a	ahy-MIR156a	MIR156
1188	sbi-miR156d	sbi-MIR156d	MIR156
1189	far-miR156b	far-MIR156b	MIR156
1190	gma-miR156f	gma-MIR156f	MIR156
1191	ath-miR156c-5p	ath-MIR156c	MIR156
1192	bna-miR156a	bna-MIR156a	MIR156
1193	gma-miR156k	gma-MIR156k	MIR156
1194	ath-miR156c-5p	ath-MIR156c	MIR156
1195	bna-miR156a	bna-MIR156a	MIR156
1196	gma-miR156k	gma-MIR156k	MIR156
1197	ath-miR156c-5p	ath-MIR156c	MIR156
1198	bna-miR156a	bna-MIR156a	MIR156
1199	gma-miR156k	gma-MIR156k	MIR156
1200	gma-miR156p	gma-MIR156p	MIR156
1201	ath-miR156c-5p	ath-MIR156c	MIR156
1202	gma-miR156q	gma-MIR156q	MIR156
1203	stu-miR156f-5p	stu-MIR156f	MIR156
1204	ama-miR156	ama-MIR156	MIR156
1205	ath-miR156c-5p	ath-MIR156c	MIR156
1206	bna-miR156a	bna-MIR156a	MIR156
1207	ath-miR156c-5p	ath-MIR156c	MIR156
1208	bna-miR156a	bna-MIR156a	MIR156
1209	ath-miR156c-5p	ath-MIR156c	MIR156
1210	bna-miR156a	bna-MIR156a	MIR156
1211	gma-miR159b-5p	gma-MIR159b	MIR159
1212	gma-miR159d	gma-MIR159d	MIR159
1213	gma-miR159e-5p	gma-MIR159e	MIR159
1214	gma-miR159a-5p	gma-MIR159a	MIR159
1215	gma-miR160c	gma-MIR160c	MIR160
1216	ath-miR160a-5p	ath-MIR160a	MIR160
1217	mes-miR160h	mes-MIR160h	MIR160
1218	gma-miR160c	gma-MIR160c	MIR160
1219	ath-miR160a-5p	ath-MIR160a	MIR160
1220	mes-miR160h	mes-MIR160h	MIR160
1221	gma-miR160c	gma-MIR160c	MIR160
1222	ath-miR160a-5p	ath-MIR160a	MIR160
1223	mes-miR160h	mes-MIR160h	MIR160
1224	gma-miR160c	gma-MIR160c	MIR160
1225	ath-miR160a-5p	ath-MIR160a	MIR160
1226	mes-miR160h	mes-MIR160h	MIR160
1227	gma-miR164b	gma-MIR164b	MIR164
1228	ath-miR164b-5p	ath-MIR164b	MIR164
1229	bra-miR164e-5p	bra-MIR164e	MIR164
1230	gma-miR164b	gma-MIR164b	MIR164
1231	ath-miR164b-5p	ath-MIR164b	MIR164
1232	bra-miR164e-5p	bra-MIR164e	MIR164
1233	gma-miR164b	gma-MIR164b	MIR164
1234	ath-miR164b-5p	ath-MIR164b	MIR164
1235	bra-miR164e-5p	bra-MIR164e	MIR164
1236	gma-miR164b	gma-MIR164b	MIR164
1237	ath-miR164b-5p	ath-MIR164b	MIR164
1238	bra-miR164e-5p	bra-MIR164e	MIR164
1239	gma-miR164b	gma-MIR164b	MIR164
1240	ath-miR164b-5p	ath-MIR164b	MIR164
1241	bra-miR164e-5p	bra-MIR164e	MIR164
1242	gma-miR164b	gma-MIR164b	MIR164
1243	ath-miR164b-5p	ath-MIR164b	MIR164
1244	bra-miR164e-5p	bra-MIR164e	MIR164
1245	mtr-miR166e-5p	mtr-MIR166e	MIR166
1246	gma-miR166i-5p	gma-MIR166i	MIR166
1247	zma-miR166c-5p	zma-MIR166c	MIR166
1248	zma-miR166c-5p	zma-MIR166c	MIR166
1249	zma-miR166c-5p	zma-MIR166c	MIR166
1250	zma-miR166c-5p	zma-MIR166c	MIR166
1251	zma-miR166c-5p	zma-MIR166c	MIR166
1252	bna-miR167d	bna-MIR167d	MIR167_1
1253	osa-miR167a-5p	osa-MIR167a	MIR167_1
1254	bna-miR167d	bna-MIR167d	MIR167_1
1255	osa-miR167d-5p	osa-MIR167d	MIR167_1
1256	ath-miR167d	ath-MIR167d	MIR167_1
1257	bna-miR167d	bna-MIR167d	MIR167_1
1258	ptc-miR167f-5p	ptc-MIR167f	MIR167_1
1259	mdm-miR167h	mdm-MIR167h	MIR167_1
1260	bna-miR167d	bna-MIR167d	MIR167_1
1261	osa-miR167d-5p	osa-MIR167d	MIR167_1
1262	ctr-miR167	ctr-MIR167	MIR167_1
1263	gma-miR167k	gma-MIR167k	-
1264	bna-miR167d	bna-MIR167d	MIR167_1
1265	osa-miR167a-5p	osa-MIR167a	MIR167_1
1266	gma-miR168b	gma-MIR168b	MIR168
1267	cme-miR168	cme-MIR168	MIR168
1268	ath-miR168a-5p	ath-MIR168a	MIR168
1269	gma-miR168b	gma-MIR168b	MIR168
1270	cme-miR168	cme-MIR168	MIR168
1271	ath-miR168a-5p	ath-MIR168a	MIR168
1272	gma-miR169v	gma-MIR169v	MIR169_2
1273	ath-miR169a-5p	ath-MIR169a	MIR169_2
1274	gma-miR169e	gma-MIR169e	MIR169_6
1275	vvi-miR169p	vvi-MIR169p	MIR169_2
1276	ath-miR169f-5p	ath-MIR169f	MIR169_2
1277	gma-miR169d	gma-MIR169d	MIR169_2
1278	gma-miR169i-5p	gma-MIR169i	MIR169_6
1279	cpa-miR169	cpa-MIR169	MIR169_2
1280	gma-miR169k	gma-MIR169k	MIR169_2
1281	gma-miR169e	gma-MIR169e	MIR169_6
1282	gma-miR169v	gma-MIR169v	MIR169_2
1283	ath-miR169b-5p	ath-MIR169b	MIR169_2
1284	gma-miR169n-5p	gma-MIR169n	MIR169_2
1285	mtr-miR169k	mtr-MIR169k	MIR169_6
1286	gma-miR169o	gma-MIR169o	MIR169_6
1287	ath-miR169f-5p	ath-MIR169f	MIR169_2
1288	mtr-miR169d-5p	mtr-MIR169d	MIR169_2
1289	gma-miR169e	gma-MIR169e	MIR169_6
1290	gma-miR169t	gma-MIR169t	MIR169_1
1291	gma-miR169e	gma-MIR169e	MIR169_6
1292	gma-miR169v	gma-MIR169v	MIR169_2
1293	ath-miR169b-5p	ath-MIR169b	MIR169_2
1294	mtr-miR169d-5p	mtr-MIR169d	MIR169_2
1295	gma-miR169e	gma-MIR169e	MIR169_6
1296	gma-miR171i-5p	gma-MIR171i	MIR171_1
1297	gma-miR171b-5p	gma-MIR171b	MIR171_2
1298	ath-miR171c-5p	ath-MIR171c	MIR171_1
1299	zma-miR171c-5p	zma-MIR171c	MIR171_1
1300	ath-miR171a-5p	ath-MIR171a	MIR171_1
1301	gma-miR171l	gma-MIR171l	MIR171_1
1302	ath-miR171c-5p	ath-MIR171c	MIR171_1
1303	zma-miR171c-5p	zma-MIR171c	MIR171_1
1304	gma-miR172b-5p	gma-MIR172b	MIR172
1305	mtr-miR172c-5p	mtr-MIR172c	MIR172
1306	gma-miR172b-5p	gma-MIR172b	MIR172
1307	mtr-miR172c-5p	mtr-MIR172c	MIR172
1308	ptc-miR172b-5p	ptc-MIR172b	MIR172
1309	ptc-miR172b-5p	ptc-MIR172b	MIR172
1310	ptc-miR172b-5p	ptc-MIR172b	MIR172
1311	gma-miR172b-5p	gma-MIR172b	MIR172
1312	mtr-miR172c-5p	mtr-MIR172c	MIR172
1313	zma-miR172b-5p	zma-MIR172b	MIR172
1314	gma-miR172g	gma-MIR172g	MIR172
1315	stu-miR172b-5p	stu-MIR172b	MIR172
1316	gma-miR172i-5p	gma-MIR172i	MIR172
1317	gma-miR172i-5p	gma-MIR172i	MIR172
1318	gma-miR2109-5p	gma-MIR2109	MIR2109
1319	gso-miR2109	gso-MIR2109	MIR2109
1320	ath-miR2111a-5p	ath-MIR2111a	MIR2111
1321	ath-miR2111a-5p	ath-MIR2111a	MIR2111
1322	mtr-miR319a-5p	mtr-MIR319a	MIR159
1323	mtr-miR319a-5p	mtr-MIR319a	MIR159
1324	mtr-miR319a-5p	mtr-MIR319a	MIR159
1325	mtr-miR319a-5p	mtr-MIR319a	MIR159
1326	mtr-miR319c-5p	mtr-MIR319c	MIR319
1327	gma-miR3522	gma-MIR3522	MIR3522
1328	gso-miR3522a	gso-MIR3522a	MIR3522
1329	gso-miR3522b	gso-MIR3522b	MIR3522
1330	gma-miR390b-5p	gma-MIR390b	MIR390
1331	ath-miR390b-5p	ath-MIR390b	MIR390
1332	gma-miR390e	gma-MIR390e	MIR390
1333	atr-miR390.1	atr-MIR390	MIR390
1334	ath-miR390b-5p	ath-MIR390b	MIR390
1335	gma-miR390e	gma-MIR390e	MIR390
1336	atr-miR390.1	atr-MIR390	MIR390
1337	ath-miR390b-5p	ath-MIR390b	MIR390
1338	gma-miR390e	gma-MIR390e	MIR390
1339	atr-miR390.1	atr-MIR390	MIR390
1340	ppe-miR393a	ppe-MIR393a	MIR393
1341	osa-miR393a	osa-MIR393a	MIR393
1342	ath-miR393a-5p	ath-MIR393a	MIR393
1343	ppe-miR393a	ppe-MIR393a	MIR393
1344	osa-miR393a	osa-MIR393a	MIR393
1345	ath-miR393a-5p	ath-MIR393a	MIR393
1346	ath-miR394a	ath-MIR394a	MIR394
1347	ath-miR394a	ath-MIR394a	MIR394
1348	vvi-miR394c	vvi-MIR394c	MIR394
1349	ath-miR394a	ath-MIR394a	MIR394
1350	gma-miR396h	gma-MIR396h	MIR396
1351	sbi-miR396b	sbi-MIR396b	MIR396
1352	osa-miR396c-5p	osa-MIR396c	MIR396
1353	gma-miR396g	gma-MIR396g	MIR396
1354	lus-miR397a	lus-MIR397a	MIR397
1355	osa-miR397a	osa-MIR397a	MIR397
1356	gma-miR408a-5p	gma-MIR408a	MIR408
1357	gma-miR408b-5p	gma-MIR408b	MIR408
1358	gma-miR408a-5p	gma-MIR408a	MIR408
1359	gma-miR4342	gma-MIR4342	-
1360	gma-miR4344	gma-MIR4344	MIR4374
1361	gma-miR4347	gma-MIR4347	MIR4347
1362	gma-miR4350	gma-MIR4350	-
1363	gma-miR4351	gma-MIR4351	-
1364	gma-miR4353	gma-MIR4353	-
1365	gma-miR4360	gma-MIR4360	MIR4380
1366	gma-miR4362	gma-MIR4362	-
1367	gma-miR4364b	gma-MIR4364b	MIR4364
1368	gma-miR4365	gma-MIR4365	-
1369	gma-miR4368a	gma-MIR4368a	MIR4368
1370	gma-miR4370	gma-MIR4370	-
1371	gma-miR4371a	gma-MIR4371a	MIR4371
1372	gma-miR4371b	gma-MIR4371b	MIR4371
1373	gma-miR4375	gma-MIR4375	-
1374	gma-miR4379	gma-MIR4379	MIR4349
1375	gma-miR4384	gma-MIR4384	-
1376	gma-miR4386	gma-MIR4386	-
1377	gma-miR4389	gma-MIR4389	-
1378	gma-miR4395	gma-MIR4395	-
1379	gma-miR4401b	gma-MIR4401b	MIR4356
1380	gma-miR4403	gma-MIR4403	-
1381	gma-miR4405	gma-MIR4405	-
1382	gma-miR4406	gma-MIR4406	-
1383	gma-miR4409	gma-MIR4409	-
1384	gma-miR4413a	gma-MIR4413a	-
1385	gma-miR4413b	gma-MIR4413b	-
1386	gma-miR4413b	gma-MIR4413b	-
1387	gma-miR4416b	gma-MIR4416b	MIR4416
1388	gma-miR482a-5p	gma-MIR482a	MIR482
1389	gma-miR482c-5p	gma-MIR482c	MIR482
1390	gma-miR4994-5p	gma-MIR4994	-
1391	gma-miR4998	gma-MIR4998	MIR4998
1392	gma-miR5037b	gma-MIR5037b	MIR5037
1393	gma-miR5038b	gma-MIR5038b	MIR5038
1394	gma-miR5037a	gma-MIR5037a	MIR5037
1395	gma-miR5225	gma-MIR5225	MIR5225
1396	gma-miR530a	gma-MIR530a	MIR530
1397	gma-miR530e	gma-MIR530e	MIR530
1398	gma-miR5370	gma-MIR5370	-
1399	gma-miR5371-5p	gma-MIR5371	-
1400	gma-miR5373	gma-MIR5373	-
1401	gma-miR5375	gma-MIR5375	-
1402	mtr-miR5559-5p	mtr-MIR5559	MIR5559
1403	gma-miR5671a	gma-MIR5671a	MIR5671
1404	gma-miR5673	gma-MIR5673	-
1405	gma-miR5678	gma-MIR5678	-
1406	gma-miR5761b	gma-MIR5761b	-
1407	gma-miR5765	gma-MIR5765	-
1408	gma-miR5767	gma-MIR5767	-
1409	gma-miR5770a	gma-MIR5770a	MIR5770
1410	gma-miR5770b	gma-MIR5770b	MIR5770
1411	gma-miR5773	gma-MIR5773	-
1412	gma-miR5774a	gma-MIR5774a	MIR5774
1413	gma-miR5774a	gma-MIR5774a	MIR5774
1414	gma-miR5776	gma-MIR5776	-
1415	gma-miR5780d	gma-MIR5780d	MIR5780
1416	gma-miR5786	gma-MIR5786	-
1417	vvi-miR828a	vvi-MIR828a	MIR828
1418	gma-miR9728	gma-MIR9728	-
1419	gma-miR9744	gma-MIR9744	-
1420	gma-miR9752	gma-MIR9752	-
1421	gma-miR9758	gma-MIR9758	-
1422	gma-miR9763	gma-MIR9763	-
1423	gma-miR9767	gma-MIR9767	-
1424	gra-miR1446	gra-MIR1446	MIR1446
1425	gma-miR156g	gma-MIR156g	MIR156
1426	aqc-miR156a	aqc-MIR156a	MIR156
1427	hbr-miR156	hbr-MIR156	MIR156
1428	ath-miR157b-5p	ath-MIR157b	MIR156
1429	mtr-miR164d	mtr-MIR164d	MIR164
1430	aly-miR166g-5p	aly-MIR166g	MIR166
1431	aly-miR166g-5p	aly-MIR166g	MIR166
1432	gra-miR166d	gra-MIR166d	MIR166
1433	bna-miR167d	bna-MIR167d	MIR167_1
1434	osa-miR167d-5p	osa-MIR167d	MIR167_1
1435	ath-miR167d	ath-MIR167d	MIR167_1
1436	gra-miR3476	gra-MIR3476	-
1437	gra-miR7484g	gra-MIR7484g	MIR7484
1438	gra-miR7484m	gra-MIR7484m	MIR7484
1439	gra-miR7486e	gra-MIR7486e	MIR7486
1440	gra-miR7486f	gra-MIR7486f	MIR7486
1441	gra-miR7486i	gra-MIR7486i	MIR7486
1442	gra-miR7486j	gra-MIR7486j	MIR7486
1443	gra-miR7492g	gra-MIR7492g	MIR7492
1444	gra-miR7492g	gra-MIR7492g	MIR7492
1445	gra-miR7492l	gra-MIR7492l	MIR7492
1446	gra-miR7492l	gra-MIR7492l	MIR7492
1447	gra-miR7492o	gra-MIR7492o	MIR7492
1448	gra-miR7494d	gra-MIR7494d	MIR7492
1449	gra-miR7504k	gra-MIR7504k	MIR7504
1450	gra-miR7504k	gra-MIR7504k	MIR7504
1451	gra-miR7505b	gra-MIR7505b	-
1452	gra-miR7506b	gra-MIR7506b	MIR7506
1453	gra-miR7584e	gra-MIR7584e	MIR7484
1454	gra-miR8634	gra-MIR8634	-
1455	gra-miR8635	gra-MIR8635	-
1456	gra-miR8636	gra-MIR8636	-
1457	gra-miR8638	gra-MIR8638	-
1458	gra-miR8641	gra-MIR8641	-
1459	gra-miR8643a	gra-MIR8643a	MIR8643
1460	gra-miR8643a	gra-MIR8643a	MIR8643
1461	gra-miR8653a	gra-MIR8653a	MIR8653
1462	gra-miR8657c	gra-MIR8657c	MIR8657
1463	gra-miR8657c	gra-MIR8657c	MIR8657
1464	gra-miR8657c	gra-MIR8657c	MIR8657
1465	gra-miR8659a	gra-MIR8659a	-
1466	gra-miR8663a	gra-MIR8663a	MIR8663
1467	gra-miR8663b	gra-MIR8663b	MIR8663
1468	gra-miR8666	gra-MIR8666	-
1469	gra-miR8667	gra-MIR8667	-
1470	gra-miR8670a	gra-MIR8670a	MIR8670
1471	gra-miR8670a	gra-MIR8670a	MIR8670
1472	gra-miR8671	gra-MIR8671	-
1473	gra-miR8687	gra-MIR8687	-
1474	gra-miR8688	gra-MIR8688	-
1475	gra-miR8691	gra-MIR8691	-
1476	gra-miR8694a	gra-MIR8694a	-
1477	gra-miR8694a	gra-MIR8694a	-
1478	gra-miR8700	gra-MIR8700	-
1479	gra-miR8703b	gra-MIR8703b	MIR8703
1480	gra-miR8705	gra-MIR8705	-
1481	gra-miR8706a	gra-MIR8706a	MIR8706
1482	gra-miR8708	gra-MIR8708	-
1483	gra-miR8710a	gra-MIR8710a	MIR8710
1484	gra-miR8711	gra-MIR8711	-
1485	gra-miR8713	gra-MIR8713	-
1486	gra-miR8720	gra-MIR8720	-
1487	gra-miR8727	gra-MIR8727	-
1488	gra-miR8733	gra-MIR8733	-
1489	gra-miR8738b	gra-MIR8738b	-
1490	gra-miR8741	gra-MIR8741	-
1491	gra-miR8743b	gra-MIR8743b	MIR8743
1492	gra-miR8743c	gra-MIR8743c	MIR8743
1493	gra-miR8743c	gra-MIR8743c	MIR8743
1494	gra-miR8750	gra-MIR8750	-
1495	gra-miR8751b	gra-MIR8751b	-
1496	gra-miR8753	gra-MIR8753	-
1497	gra-miR8754	gra-MIR8754	-
1498	gra-miR8757a	gra-MIR8757a	MIR8757
1499	gra-miR8759	gra-MIR8759	-
1500	gra-miR8760	gra-MIR8760	-
1501	gra-miR8762a	gra-MIR8762a	MIR8762
1502	gra-miR8762b	gra-MIR8762b	MIR8762
1503	gra-miR8762b	gra-MIR8762b	MIR8762
1504	gra-miR8762d	gra-MIR8762d	MIR8762
1505	gra-miR8762e	gra-MIR8762e	-
1506	gra-miR8763	gra-MIR8763	-
1507	gra-miR8766	gra-MIR8766	-
1508	gra-miR8767a	gra-MIR8767a	MIR8767
1509	gra-miR8767c	gra-MIR8767c	MIR8767
1510	gra-miR8767c	gra-MIR8767c	MIR8767
1511	gra-miR8768	gra-MIR8768	-
1512	gra-miR8770	gra-MIR8770	-
1513	gra-miR8777	gra-MIR8777	-
1514	gra-miR8778	gra-MIR8778	-
1515	gra-miR8784	gra-MIR8784	-
1516	gra-miR8786b	gra-MIR8786b	-
1517	gma-miR1509a	gma-MIR1509a	MIR1509
1518	gma-miR1510a-5p	gma-MIR1510a	MIR1510
1519	gma-miR3522	gma-MIR3522	MIR3522
1520	gso-miR3522a	gso-MIR3522a	MIR3522
1521	gso-miR3522b	gso-MIR3522b	MIR3522
1522	gma-miR482e	gma-MIR482e	MIR482
1523	ath-miR156c-5p	ath-MIR156c	MIR156
1524	bna-miR156a	bna-MIR156a	MIR156
1525	stu-miR156f-5p	stu-MIR156f	MIR156
1526	ama-miR156	ama-MIR156	MIR156
1527	ath-miR156c-5p	ath-MIR156c	MIR156
1528	bna-miR156a	bna-MIR156a	MIR156
1529	gma-miR156g	gma-MIR156g	MIR156
1530	aqc-miR156a	aqc-MIR156a	MIR156
1531	hbr-miR156	hbr-MIR156	MIR156
1532	ath-miR157b-5p	ath-MIR157b	MIR156
1533	hbr-miR398	hbr-MIR398	MIR398
1534	hbr-miR476	hbr-MIR476	-
1535	ptc-miR476a	ptc-MIR476a	MIR476
1536	hbr-miR482a	hbr-MIR482a	MIR482
1537	hbr-miR6166	hbr-MIR6166	-
1538	hbr-miR6482	hbr-MIR6482	-
1539	hbr-miR6485	hbr-MIR6485	-
1540	hci-miR156a	hci-MIR156a	MIR156
1541	har-miR156c	har-MIR156c	-
1542	ptc-miR156k	ptc-MIR156k	MIR156
1543	ath-miR390b-5p	ath-MIR390b	MIR390
1544	gma-miR390e	gma-MIR390e	MIR390
1545	gma-miR160c	gma-MIR160c	MIR160
1546	osa-miR393a	osa-MIR393a	MIR393
1547	ath-miR393a-5p	ath-MIR393a	MIR393
1548	ata-miR393-5p	ata-MIR393	MIR393
1549	ptc-miR530a	ptc-MIR530a	MIR530
1550	osa-miR166c-5p	osa-MIR166c	MIR166
1551	hvu-miR169	hvu-MIR169	-
1552	hvu-miR397a	hvu-MIR397a	MIR397
1553	hvu-miR5048b	hvu-MIR5048b	MIR5048
1554	tae-miR5048-5p	tae-MIR5048	-
1555	hvu-miR5049a	hvu-MIR5049a	MIR5067
1556	hvu-miR6176	hvu-MIR6176	-
1557	hvu-miR6177	hvu-MIR6177	-
1558	hvu-miR6178	hvu-MIR6178	-
1559	hvu-miR6181	hvu-MIR6181	-
1560	hvu-miR6183	hvu-MIR6183	-
1561	hvu-miR6185	hvu-MIR6185	-
1562	hvu-miR6189	hvu-MIR6189	-
1563	hvu-miR6190	hvu-MIR6190	-
1564	hvu-miR6193	hvu-MIR6193	-
1565	hvu-miR6195	hvu-MIR6195	-
1566	hvu-miR6196	hvu-MIR6196	-
1567	hvu-miR6199	hvu-MIR6199	-
1568	hvu-miR6201	hvu-MIR6201	MIR6201
1569	hvu-miR6202	hvu-MIR6202	-
1570	hvu-miR6209	hvu-MIR6209	-
1571	hvu-miR6211	hvu-MIR6211	-
1572	hvu-miR6212	hvu-MIR6212	-
1573	hvu-miR6214	hvu-MIR6214	-
1574	bna-miR167d	bna-MIR167d	MIR167_1
1575	osa-miR167a-5p	osa-MIR167a	MIR167_1
1576	gma-miR168b	gma-MIR168b	MIR168
1577	cme-miR168	cme-MIR168	MIR168
1578	ath-miR168a-5p	ath-MIR168a	MIR168
1579	gma-miR171l	gma-MIR171l	MIR171_1
1580	gma-miR172b-5p	gma-MIR172b	MIR172
1581	mtr-miR172c-5p	mtr-MIR172c	MIR172
1582	zma-miR172b-5p	zma-MIR172b	MIR172
1583	gma-miR172g	gma-MIR172g	MIR172
1584	stu-miR172b-5p	stu-MIR172b	MIR172
1585	ath-miR390b-5p	ath-MIR390b	MIR390
1586	gma-miR390e	gma-MIR390e	MIR390
1587	atr-miR390.1	atr-MIR390	MIR390
1588	gma-miR396h	gma-MIR396h	MIR396
1589	sbi-miR396b	sbi-MIR396b	MIR396
1590	lja-miR7516-5p	lja-MIR7516	-
1591	lja-miR7519	lja-MIR7519	-
1592	lja-miR7521	lja-MIR7521	-
1593	lja-miR7523b	lja-MIR7523b	MIR7523
1594	lja-miR7525	lja-MIR7525	-
1595	lja-miR7530	lja-MIR7530	-
1596	lja-miR7531	lja-MIR7531	-
1597	lja-miR7532a	lja-MIR7532a	MIR7532
1598	lja-miR7532a	lja-MIR7532a	MIR7532
1599	lja-miR7535	lja-MIR7535	-
1600	lja-miR7538	lja-MIR7538	-
1601	lja-miR7542	lja-MIR7542	-
1602	lja-miR7543	lja-MIR7543	-
1603	ath-miR156h	ath-MIR156h	MIR156
1604	smo-miR156c	smo-MIR156c	MIR156
1605	gma-miR156g	gma-MIR156g	MIR156
1606	aqc-miR156a	aqc-MIR156a	MIR156
1607	hbr-miR156	hbr-MIR156	MIR156
1608	ath-miR157b-5p	ath-MIR157b	MIR156
1609	gma-miR156g	gma-MIR156g	MIR156
1610	aqc-miR156a	aqc-MIR156a	MIR156
1611	hbr-miR156	hbr-MIR156	MIR156
1612	ath-miR157b-5p	ath-MIR157b	MIR156
1613	gma-miR160c	gma-MIR160c	MIR160
1614	ath-miR160a-5p	ath-MIR160a	MIR160
1615	mes-miR160g	mes-MIR160g	MIR160
1616	gma-miR160c	gma-MIR160c	MIR160
1617	ath-miR160a-5p	ath-MIR160a	MIR160
1618	gma-miR164b	gma-MIR164b	MIR164
1619	ath-miR164b-5p	ath-MIR164b	MIR164
1620	gma-miR164b	gma-MIR164b	MIR164
1621	ath-miR164b-5p	ath-MIR164b	MIR164
1622	gma-miR164b	gma-MIR164b	MIR164
1623	ath-miR164b-5p	ath-MIR164b	MIR164
1624	zma-miR166c-5p	zma-MIR166c	MIR166
1625	zma-miR166c-5p	zma-MIR166c	MIR166
1626	bna-miR167d	bna-MIR167d	MIR167_1
1627	lus-miR167a	lus-MIR167a	MIR167_1
1628	bna-miR167d	bna-MIR167d	MIR167_1
1629	ptc-miR167f-5p	ptc-MIR167f	MIR167_1
1630	gma-miR168b	gma-MIR168b	MIR168
1631	cme-miR168	cme-MIR168	MIR168
1632	ath-miR168a-5p	ath-MIR168a	MIR168
1633	gma-miR168b	gma-MIR168b	MIR168
1634	cme-miR168	cme-MIR168	MIR168
1635	ath-miR168a-5p	ath-MIR168a	MIR168
1636	ptc-miR169w	ptc-MIR169w	MIR169_1
1637	sbi-miR169d-5p	sbi-MIR169d	MIR169_1
1638	gma-miR169v	gma-MIR169v	MIR169_2
1639	ath-miR169a-5p	ath-MIR169a	MIR169_2
1640	gma-miR172b-5p	gma-MIR172b	MIR172
1641	mtr-miR172c-5p	mtr-MIR172c	MIR172
1642	gra-miR172b	gra-MIR172b	MIR172
1643	ptc-miR172b-5p	ptc-MIR172b	MIR172
1644	ptc-miR172b-5p	ptc-MIR172b	MIR172
1645	ppe-miR393a	ppe-MIR393a	MIR393
1646	ath-miR394a	ath-MIR394a	MIR394
1647	gma-miR396h	gma-MIR396h	MIR396
1648	sbi-miR396b	sbi-MIR396b	MIR396
1649	osa-miR396c-5p	osa-MIR396c	MIR396
1650	gma-miR396h	gma-MIR396h	MIR396
1651	sbi-miR396b	sbi-MIR396b	MIR396
1652	osa-miR396c-5p	osa-MIR396c	MIR396
1653	lus-miR397a	lus-MIR397a	MIR397
1654	lja-miR397	lja-MIR397	MIR397
1655	osa-miR397b	osa-MIR397b	MIR397
1656	lus-miR397a	lus-MIR397a	MIR397
1657	osa-miR397a	osa-MIR397a	MIR397
1658	mdm-miR397a	mdm-MIR397a	MIR397
1659	cme-miR156j	cme-MIR156j	MIR156
1660	ath-miR156c-5p	ath-MIR156c	MIR156
1661	bna-miR156a	bna-MIR156a	MIR156
1662	gma-miR156k	gma-MIR156k	MIR156
1663	gma-miR156g	gma-MIR156g	MIR156
1664	gma-miR156e	gma-MIR156e	MIR156
1665	aqc-miR156a	aqc-MIR156a	MIR156
1666	mdm-miR156ae	mdm-MIR156ae	MIR156
1667	cme-miR156j	cme-MIR156j	MIR156
1668	ath-miR156c-5p	ath-MIR156c	MIR156
1669	bna-miR156a	bna-MIR156a	MIR156
1670	gma-miR156k	gma-MIR156k	MIR156
1671	cme-miR156j	cme-MIR156j	MIR156
1672	ath-miR156c-5p	ath-MIR156c	MIR156
1673	bna-miR156a	bna-MIR156a	MIR156
1674	gma-miR156k	gma-MIR156k	MIR156
1675	cme-miR156j	cme-MIR156j	MIR156
1676	ath-miR156c-5p	ath-MIR156c	MIR156
1677	bna-miR156a	bna-MIR156a	MIR156
1678	gma-miR156k	gma-MIR156k	MIR156
1679	ath-miR156c-5p	ath-MIR156c	MIR156
1680	bna-miR156a	bna-MIR156a	MIR156
1681	gma-miR156k	gma-MIR156k	MIR156
1682	ath-miR156c-5p	ath-MIR156c	MIR156
1683	bna-miR156a	bna-MIR156a	MIR156
1684	gma-miR156g	gma-MIR156g	MIR156
1685	gma-miR156e	gma-MIR156e	MIR156
1686	aqc-miR156a	aqc-MIR156a	MIR156
1687	gma-miR156g	gma-MIR156g	MIR156
1688	gma-miR156e	gma-MIR156e	MIR156
1689	aqc-miR156a	aqc-MIR156a	MIR156
1690	aqc-miR529	aqc-MIR529	MIR529
1691	ahy-miR156a	ahy-MIR156a	MIR156
1692	sbi-miR156d	sbi-MIR156d	MIR156
1693	far-miR156b	far-MIR156b	MIR156
1694	gma-miR156f	gma-MIR156f	MIR156
1695	aqc-miR529	aqc-MIR529	MIR529
1696	ahy-miR156a	ahy-MIR156a	MIR156
1697	sbi-miR156d	sbi-MIR156d	MIR156
1698	far-miR156b	far-MIR156b	MIR156
1699	gma-miR156f	gma-MIR156f	MIR156
1700	gma-miR156g	gma-MIR156g	MIR156
1701	gma-miR156e	gma-MIR156e	MIR156
1702	aqc-miR156a	aqc-MIR156a	MIR156
1703	gma-miR160c	gma-MIR160c	MIR160
1704	ath-miR160a-5p	ath-MIR160a	MIR160
1705	gma-miR160c	gma-MIR160c	MIR160
1706	ath-miR160a-5p	ath-MIR160a	MIR160
1707	aly-miR162a-5p	aly-MIR162a	MIR162_1
1708	mdm-miR164a	mdm-MIR164a	MIR164
1709	gma-miR164b	gma-MIR164b	MIR164
1710	ath-miR164b-5p	ath-MIR164b	MIR164
1711	bra-miR164e-5p	bra-MIR164e	MIR164
1712	bna-miR167d	bna-MIR167d	MIR167_1
1713	ptc-miR167f-5p	ptc-MIR167f	MIR167_1
1714	mdm-miR167h	mdm-MIR167h	MIR167_1
1715	bna-miR167d	bna-MIR167d	MIR167_1
1716	osa-miR167a-5p	osa-MIR167a	MIR167_1
1717	bna-miR167d	bna-MIR167d	MIR167_1
1718	osa-miR167a-5p	osa-MIR167a	MIR167_1
1719	bna-miR167d	bna-MIR167d	MIR167_1
1720	ptc-miR167f-5p	ptc-MIR167f	MIR167_1
1721	mdm-miR167h	mdm-MIR167h	MIR167_1
1722	bna-miR167d	bna-MIR167d	MIR167_1
1723	ptc-miR167f-5p	ptc-MIR167f	MIR167_1
1724	mdm-miR167h	mdm-MIR167h	MIR167_1
1725	gma-miR168b	gma-MIR168b	MIR168
1726	cme-miR168	cme-MIR168	MIR168
1727	ath-miR168a-5p	ath-MIR168a	MIR168
1728	sbi-miR169d-5p	sbi-MIR169d	MIR169_1
1729	ath-miR169h	ath-MIR169h	MIR169_1
1730	bna-miR169g	bna-MIR169g	MIR169_1
1731	mdm-miR169f	mdm-MIR169f	MIR169_1
1732	gma-miR171l	gma-MIR171l	MIR171_1
1733	gma-miR171l	gma-MIR171l	MIR171_1
1734	mdm-miR171o	mdm-MIR171o	MIR171_1
1735	mdm-miR171o	mdm-MIR171o	MIR171_1
1736	stu-miR172c-5p	stu-MIR172c	MIR172
1737	ata-miR172c-5p	ata-MIR172c	MIR172
1738	stu-miR172c-5p	stu-MIR172c	MIR172
1739	ata-miR172c-5p	ata-MIR172c	MIR172
1740	ath-miR2111a-5p	ath-MIR2111a	MIR2111
1741	mdm-miR3627b	mdm-MIR3627b	MIR3627
1742	ath-miR390b-5p	ath-MIR390b	MIR390
1743	gma-miR390e	gma-MIR390e	MIR390
1744	atr-miR390.1	atr-MIR390	MIR390
1745	ath-miR390b-5p	ath-MIR390b	MIR390
1746	gma-miR390e	gma-MIR390e	MIR390
1747	atr-miR390.1	atr-MIR390	MIR390
1748	ath-miR390b-5p	ath-MIR390b	MIR390
1749	gma-miR390e	gma-MIR390e	MIR390
1750	mdm-miR391	mdm-MIR391	-
1751	osa-miR393a	osa-MIR393a	MIR393
1752	zma-miR393a-5p	zma-MIR393a	MIR393
1753	ata-miR393-5p	ata-MIR393	MIR393
1754	ppe-miR393a	ppe-MIR393a	MIR393
1755	osa-miR393a	osa-MIR393a	MIR393
1756	ath-miR393a-5p	ath-MIR393a	MIR393
1757	osa-miR396c-5p	osa-MIR396c	MIR396
1758	mdm-miR396f	mdm-MIR396f	MIR396
1759	mdm-miR396f	mdm-MIR396f	MIR396
1760	lus-miR397a	lus-MIR397a	MIR397
1761	osa-miR397a	osa-MIR397a	MIR397
1762	mdm-miR397a	mdm-MIR397a	MIR397
1763	mdm-miR408c	mdm-MIR408c	MIR408
1764	mdm-miR408c	mdm-MIR408c	MIR408
1765	mdm-miR477a	mdm-MIR477a	-
1766	mdm-miR5225a	mdm-MIR5225a	MIR5225
1767	mdm-miR5225a	mdm-MIR5225a	MIR5225
1768	mdm-miR5225c	mdm-MIR5225c	MIR5225
1769	ppt-miR535c	ppt-MIR535c	MIR535
1770	mdm-miR535c	mdm-MIR535c	MIR535
1771	mdm-miR7121a	mdm-MIR7121a	MIR7121
1772	mdm-miR7121a	mdm-MIR7121a	MIR7121
1773	mdm-miR7121d	mdm-MIR7121d	MIR7121
1774	mdm-miR7121d	mdm-MIR7121d	MIR7121
1775	mdm-miR7121d	mdm-MIR7121d	MIR7121
1776	mdm-miR7121d	mdm-MIR7121d	MIR7121
1777	mdm-miR7122a	mdm-MIR7122a	MIR1509
1778	mdm-miR7122a	mdm-MIR7122a	MIR1509
1779	mdm-miR7127a	mdm-MIR7127a	MIR7127
1780	mdm-miR7127a	mdm-MIR7127a	MIR7127
1781	ath-miR156c-5p	ath-MIR156c	MIR156
1782	ath-miR156c-5p	ath-MIR156c	MIR156
1783	bna-miR156a	bna-MIR156a	MIR156
1784	ath-miR156c-5p	ath-MIR156c	MIR156
1785	bna-miR156a	bna-MIR156a	MIR156
1786	gma-miR156k	gma-MIR156k	MIR156
1787	ath-miR156c-5p	ath-MIR156c	MIR156
1788	bna-miR156a	bna-MIR156a	MIR156
1789	gma-miR156g	gma-MIR156g	MIR156
1790	aqc-miR156a	aqc-MIR156a	MIR156
1791	hbr-miR156	hbr-MIR156	MIR156
1792	ath-miR157b-5p	ath-MIR157b	MIR156
1793	aqc-miR529	aqc-MIR529	MIR529
1794	ahy-miR156a	ahy-MIR156a	MIR156
1795	sbi-miR156d	sbi-MIR156d	MIR156
1796	far-miR156b	far-MIR156b	MIR156
1797	gma-miR156f	gma-MIR156f	MIR156
1798	gma-miR160c	gma-MIR160c	MIR160
1799	ath-miR160a-5p	ath-MIR160a	MIR160
1800	gma-miR160c	gma-MIR160c	MIR160
1801	mes-miR160c	mes-MIR160c	MIR160
1802	osa-miR160f-5p	osa-MIR160f	MIR160
1803	vvi-miR160a	vvi-MIR160a	MIR160
1804	gma-miR160c	gma-MIR160c	MIR160
1805	ath-miR160a-5p	ath-MIR160a	MIR160
1806	mes-miR160g	mes-MIR160g	MIR160
1807	aly-miR162a-5p	aly-MIR162a	MIR162_1
1808	gma-miR164b	gma-MIR164b	MIR164
1809	ath-miR164b-5p	ath-MIR164b	MIR164
1810	bra-miR164e-5p	bra-MIR164e	MIR164
1811	mtr-miR164d	mtr-MIR164d	MIR164
1812	zma-miR166c-5p	zma-MIR166c	MIR166
1813	zma-miR166c-5p	zma-MIR166c	MIR166
1814	zma-miR166c-5p	zma-MIR166c	MIR166
1815	aly-miR166g-5p	aly-MIR166g	MIR166
1816	gra-miR166d	gra-MIR166d	MIR166
1817	bna-miR167d	bna-MIR167d	MIR167_1
1818	osa-miR167a-5p	osa-MIR167a	MIR167_1
1819	bna-miR167d	bna-MIR167d	MIR167_1
1820	osa-miR167d-5p	osa-MIR167d	MIR167_1
1821	ctr-miR167	ctr-MIR167	MIR167_1
1822	bna-miR167d	bna-MIR167d	MIR167_1
1823	ptc-miR167f-5p	ptc-MIR167f	MIR167_1
1824	mdm-miR167h	mdm-MIR167h	MIR167_1
1825	sbi-miR169d-5p	sbi-MIR169d	MIR169_1
1826	ath-miR169h	ath-MIR169h	MIR169_1
1827	bna-miR169g	bna-MIR169g	MIR169_1
1828	gma-miR169e	gma-MIR169e	MIR169_6
1829	gma-miR169v	gma-MIR169v	MIR169_2
1830	ath-miR169b-5p	ath-MIR169b	MIR169_2
1831	gma-miR169e	gma-MIR169e	MIR169_6
1832	gma-miR169v	gma-MIR169v	MIR169_2
1833	ath-miR169b-5p	ath-MIR169b	MIR169_2
1834	ptc-miR169s	ptc-MIR169s	MIR169_2
1835	gma-miR169e	gma-MIR169e	MIR169_6
1836	bdi-miR169m	bdi-MIR169m	MIR169_2
1837	mes-miR169f	mes-MIR169f	MIR169_2
1838	vvi-miR169o	vvi-MIR169o	MIR169_2
1839	ath-miR169f-5p	ath-MIR169f	MIR169_2
1840	ptc-miR169t	ptc-MIR169t	MIR169_3
1841	cpa-miR169	cpa-MIR169	MIR169_2
1842	gma-miR169k	gma-MIR169k	MIR169_2
1843	mes-miR169n	mes-MIR169n	-
1844	sbi-miR169d-5p	sbi-MIR169d	MIR169_1
1845	ath-miR169h	ath-MIR169h	MIR169_1
1846	sbi-miR169d-5p	sbi-MIR169d	MIR169_1
1847	ath-miR169h	ath-MIR169h	MIR169_1
1848	bna-miR169g	bna-MIR169g	MIR169_1
1849	sbi-miR169d-5p	sbi-MIR169d	MIR169_1
1850	ath-miR169h	ath-MIR169h	MIR169_1
1851	bna-miR169g	bna-MIR169g	MIR169_1
1852	sbi-miR169d-5p	sbi-MIR169d	MIR169_1
1853	ath-miR169h	ath-MIR169h	MIR169_1
1854	sbi-miR169d-5p	sbi-MIR169d	MIR169_1
1855	ath-miR169h	ath-MIR169h	MIR169_1
1856	ath-miR171c-5p	ath-MIR171c	MIR171_1
1857	zma-miR171c-5p	zma-MIR171c	MIR171_1
1858	zma-miR171n-5p	zma-MIR171n	MIR171_1
1859	ath-miR171a-5p	ath-MIR171a	MIR171_1
1860	ath-miR171a-5p	ath-MIR171a	MIR171_1
1861	ptc-miR172b-5p	ptc-MIR172b	MIR172
1862	ptc-miR172b-5p	ptc-MIR172b	MIR172
1863	ath-miR2111a-5p	ath-MIR2111a	MIR2111
1864	mes-miR2950	mes-MIR2950	-
1865	sly-miR319c-5p	sly-MIR319c	MIR159
1866	ath-miR390b-5p	ath-MIR390b	MIR390
1867	gma-miR390e	gma-MIR390e	MIR390
1868	ppe-miR393a	ppe-MIR393a	MIR393
1869	osa-miR393a	osa-MIR393a	MIR393
1870	ath-miR393a-5p	ath-MIR393a	MIR393
1871	osa-miR393a	osa-MIR393a	MIR393
1872	zma-miR393a-5p	zma-MIR393a	MIR393
1873	ata-miR393-5p	ata-MIR393	MIR393
1874	osa-miR393a	osa-MIR393a	MIR393
1875	zma-miR393a-5p	zma-MIR393a	MIR393
1876	ata-miR393-5p	ata-MIR393	MIR393
1877	ath-miR394a	ath-MIR394a	MIR394
1878	ath-miR394a	ath-MIR394a	MIR394
1879	vvi-miR394c	vvi-MIR394c	MIR394
1880	hbr-miR396a	hbr-MIR396a	MIR396
1881	osa-miR396c-5p	osa-MIR396c	MIR396
1882	osa-miR396c-5p	osa-MIR396c	MIR396
1883	mes-miR397	mes-MIR397	MIR397
1884	nta-miR477a	nta-MIR477a	MIR477
1885	mes-miR477b	mes-MIR477b	MIR477
1886	mes-miR477d	mes-MIR477d	MIR477
1887	nta-miR477a	nta-MIR477a	MIR477
1888	mes-miR477b	mes-MIR477b	MIR477
1889	mes-miR477g	mes-MIR477g	MIR477
1890	vvi-miR477a	vvi-MIR477a	MIR477
1891	ppt-miR477h	ppt-MIR477h	MIR477
1892	mes-miR477h	mes-MIR477h	-
1893	mes-miR477i	mes-MIR477i	MIR477
1894	stu-miR530	stu-MIR530	MIR530
1895	ptc-miR530a	ptc-MIR530a	MIR530
1896	mes-miR530b	mes-MIR530b	MIR530
1897	stu-miR530	stu-MIR530	MIR530
1898	ptc-miR530a	ptc-MIR530a	MIR530
1899	mes-miR530b	mes-MIR530b	MIR530
1900	mes-miR535a	mes-MIR535a	MIR535
1901	mtr-miR1509b	mtr-MIR1509b	MIR1509
1902	ahy-miR156a	ahy-MIR156a	MIR156
1903	sbi-miR156d	sbi-MIR156d	MIR156
1904	ath-miR156c-5p	ath-MIR156c	MIR156
1905	bna-miR156a	bna-MIR156a	MIR156
1906	ath-miR156c-5p	ath-MIR156c	MIR156
1907	bna-miR156a	bna-MIR156a	MIR156
1908	gma-miR156k	gma-MIR156k	MIR156
1909	pta-miR156a	pta-MIR156a	MIR156
1910	aqc-miR156a	aqc-MIR156a	MIR156
1911	hbr-miR156	hbr-MIR156	MIR156
1912	ath-miR157b-5p	ath-MIR157b	MIR156
1913	mtr-miR156g-5p	mtr-MIR156g	MIR156
1914	ath-miR156c-5p	ath-MIR156c	MIR156
1915	bna-miR156a	bna-MIR156a	MIR156
1916	gma-miR156k	gma-MIR156k	MIR156
1917	gma-miR160c	gma-MIR160c	MIR160
1918	ath-miR160a-5p	ath-MIR160a	MIR160
1919	mes-miR160h	mes-MIR160h	MIR160
1920	osa-miR160f-5p	osa-MIR160f	MIR160
1921	vvi-miR160a	vvi-MIR160a	MIR160
1922	gma-miR160c	gma-MIR160c	MIR160
1923	ath-miR160a-5p	ath-MIR160a	MIR160
1924	mes-miR160h	mes-MIR160h	MIR160
1925	gma-miR160c	gma-MIR160c	MIR160
1926	ath-miR160a-5p	ath-MIR160a	MIR160
1927	gma-miR164b	gma-MIR164b	MIR164
1928	ath-miR164b-5p	ath-MIR164b	MIR164
1929	bra-miR164e-5p	bra-MIR164e	MIR164
1930	mtr-miR164d	mtr-MIR164d	MIR164
1931	aly-miR166g-5p	aly-MIR166g	MIR166
1932	gra-miR166d	gra-MIR166d	MIR166
1933	mtr-miR166e-5p	mtr-MIR166e	MIR166
1934	mtr-miR168a	mtr-MIR168a	MIR168
1935	gma-miR168b	gma-MIR168b	MIR168
1936	cme-miR168	cme-MIR168	MIR168
1937	ath-miR168a-5p	ath-MIR168a	MIR168
1938	mtr-miR169d-5p	mtr-MIR169d	MIR169_2
1939	gma-miR169e	gma-MIR169e	MIR169_6
1940	bna-miR169m	bna-MIR169m	MIR169_2
1941	mtr-miR169h	mtr-MIR169h	-
1942	bna-miR169m	bna-MIR169m	MIR169_2
1943	mtr-miR169h	mtr-MIR169h	-
1944	mtr-miR169j	mtr-MIR169j	MIR169_6
1945	mtr-miR169k	mtr-MIR169k	MIR169_6
1946	gma-miR169o	gma-MIR169o	MIR169_6
1947	ath-miR171a-5p	ath-MIR171a	MIR171_1
1948	gma-miR172b-5p	gma-MIR172b	MIR172
1949	mtr-miR172c-5p	mtr-MIR172c	MIR172
1950	mtr-miR172d-5p	mtr-MIR172d	MIR172
1951	ptc-miR172b-5p	ptc-MIR172b	MIR172
1952	ath-miR2111a-5p	ath-MIR2111a	MIR2111
1953	ath-miR2111a-5p	ath-MIR2111a	MIR2111
1954	ath-miR2111a-5p	ath-MIR2111a	MIR2111
1955	ath-miR2111a-5p	ath-MIR2111a	MIR2111
1956	ath-miR2111a-5p	ath-MIR2111a	MIR2111
1957	ath-miR2111a-5p	ath-MIR2111a	MIR2111
1958	ath-miR2111a-5p	ath-MIR2111a	MIR2111
1959	ath-miR2111a-5p	ath-MIR2111a	MIR2111
1960	mtr-miR2586b	mtr-MIR2586b	-
1961	mtr-miR2587a	mtr-MIR2587a	MIR2587
1962	mtr-miR2587a	mtr-MIR2587a	MIR2587
1963	mtr-miR2587a	mtr-MIR2587a	MIR2587
1964	mtr-miR2588a	mtr-MIR2588a	MIR2588
1965	mtr-miR2588a	mtr-MIR2588a	MIR2588
1966	mtr-miR2590h	mtr-MIR2590h	MIR2590
1967	mtr-miR2590h	mtr-MIR2590h	MIR2590
1968	mtr-miR2590h	mtr-MIR2590h	MIR2590
1969	mtr-miR2590h	mtr-MIR2590h	MIR2590
1970	mtr-miR2590h	mtr-MIR2590h	MIR2590
1971	mtr-miR2591	mtr-MIR2591	-
1972	mtr-miR2592b-5p	mtr-MIR2592b	MIR2592
1973	mtr-miR2592ae	mtr-MIR2592ae	MIR2592
1974	mtr-miR2592d-5p	mtr-MIR2592d	MIR2592
1975	mtr-miR2592b-5p	mtr-MIR2592b	MIR2592
1976	mtr-miR2592ae	mtr-MIR2592ae	MIR2592
1977	mtr-miR2592d-5p	mtr-MIR2592d	MIR2592
1978	mtr-miR2592b-3p	mtr-MIR2592b	MIR2592
1979	mtr-miR2592ap	mtr-MIR2592ap	MIR2592
1980	mtr-miR2592ap	mtr-MIR2592ap	MIR2592
1981	mtr-miR2592bm-5p	mtr-MIR2592bm	MIR2592
1982	mtr-miR2592b-5p	mtr-MIR2592b	MIR2592
1983	mtr-miR2592ae	mtr-MIR2592ae	MIR2592
1984	mtr-miR2592d-5p	mtr-MIR2592d	MIR2592
1985	mtr-miR2592bm-5p	mtr-MIR2592bm	MIR2592
1986	mtr-miR2592ap	mtr-MIR2592ap	MIR2592
1987	mtr-miR2592ap	mtr-MIR2592ap	MIR2592
1988	mtr-miR2592bl-5p	mtr-MIR2592bl	MIR2592
1989	mtr-miR2592bm-5p	mtr-MIR2592bm	MIR2592
1990	mtr-miR2592bm-5p	mtr-MIR2592bm	MIR2592
1991	mtr-miR2592bq-5p	mtr-MIR2592bq	MIR2592
1992	mtr-miR2592br-5p	mtr-MIR2592br	MIR2592
1993	mtr-miR2592b-5p	mtr-MIR2592b	MIR2592
1994	mtr-miR2592ae	mtr-MIR2592ae	MIR2592
1995	mtr-miR2592d-5p	mtr-MIR2592d	MIR2592
1996	mtr-miR2592b-5p	mtr-MIR2592b	MIR2592
1997	mtr-miR2592ae	mtr-MIR2592ae	MIR2592
1998	mtr-miR2592d-5p	mtr-MIR2592d	MIR2592
[truncated: 1,589 more rows]

## Sheet: novel miRNA
miRNA_Index	miR_name	family
1	Nov-m0001-3p	MIR8670
2	Nov-m0002-5p	-
3	Nov-m0003-5p	MIR4374
4	Nov-m0004-3p	-
5	Nov-m0005-5p	MIR814
6	Nov-m0006-5p	MIR9677
7	Nov-m0007-3p	-
8	Nov-m0008-3p	-
9	Nov-m0009-3p	-
10	Nov-m0010-5p	MIR1514
11	Nov-m0011-3p	-
12	Nov-m0012-3p	MIR5645
13	Nov-m0013-5p	MIR5079
14	Nov-m0014-3p	MIR3709
15	Nov-m0015-3p	MIR820
16	Nov-m0016-5p	MIR848
17	Nov-m0017-5p	-
18	Nov-m0018-5p	MIR2619
19	Nov-m0019-3p	MIR5185
20	Nov-m0020-3p	-
21	Nov-m0021-3p	MIR482
22	Nov-m0022-3p	-
23	Nov-m0023-3p	MIR818
24	Nov-m0023-5p	MIR8653
25	Nov-m0024-5p	MIR1882
26	Nov-m0025-3p	MIR1319
27	Nov-m0026-5p	MIR7991
28	Nov-m0027-5p	MIR447
29	Nov-m0028-3p	-
30	Nov-m0029-5p	MIR5272
31	Nov-m0030-3p	-
32	Nov-m0031-5p	MIR5167
33	Nov-m0032-5p	MIR1888
34	Nov-m0033-3p	MIR7991
35	Nov-m0034-3p	MIR5241
36	Nov-m0035-5p	MIR481
37	Nov-m0036-5p	MIR5539
38	Nov-m0037-3p	MIR5272
39	Nov-m0038-5p	-
40	Nov-m0039-5p	-
41	Nov-m0040-5p	-
42	Nov-m0041-3p	MIR7127
43	Nov-m0042-3p	MIR771
44	Nov-m0043-5p	-
45	Nov-m0044-5p	-
46	Nov-m0045-3p	MIR858
47	Nov-m0046-3p	-
48	Nov-m0047-3p	MIR5595
49	Nov-m0048-3p	MIR6145
50	Nov-m0049-5p	-
51	Nov-m0050-3p	-
52	Nov-m0051-5p	MIR812
53	Nov-m0052-3p	MIR856
54	Nov-m0053-5p	MIR5774
55	Nov-m0054-5p	MIR1878
56	Nov-m0055-5p	-
57	Nov-m0056-5p	MIR390
58	Nov-m0057-3p	-
59	Nov-m0058-5p	-
60	Nov-m0059-3p	-
61	Nov-m0060-3p	MIR827
62	Nov-m0061-3p	-
63	Nov-m0062-5p	MIR827_5
64	Nov-m0063-5p	MIR533
65	Nov-m0064-3p	MIR6151
66	Nov-m0065-3p	MIR828
67	Nov-m0066-5p	-
68	Nov-m0067-3p	MIR4227
69	Nov-m0068-3p	MIR827_5
70	Nov-m0069-5p	MIR2118
71	Nov-m0070-5p	-
72	Nov-m0071-3p	-
73	Nov-m0072-5p	MIR530
74	Nov-m0073-3p	MIR168
75	Nov-m0073-5p	MIR6267
76	Nov-m0074-3p	-
77	Nov-m0075-3p	MIR7993
78	Nov-m0076-3p	MIR2670
79	Nov-m0077-3p	-
80	Nov-m0078-5p	MIR5163
81	Nov-m0079-3p	-
82	Nov-m0080-5p	MIR9772
83	Nov-m0081-3p	MIR8757
84	Nov-m0082-3p	MIR399
85	Nov-m0083-5p	-
86	Nov-m0084-3p	-
87	Nov-m0085-5p	-
88	Nov-m0086-3p	-
89	Nov-m0087-3p	MIR8024
90	Nov-m0088-3p	MIR5565
91	Nov-m0089-3p	-
92	Nov-m0090-5p	MIR5157
93	Nov-m0091-3p	MIR861
94	Nov-m0092-5p	-
95	Nov-m0093-3p	-
96	Nov-m0094-3p	-
97	Nov-m0095-3p	-
98	Nov-m0096-5p	-
99	Nov-m0097-5p	MIR812
100	Nov-m0098-3p	-
101	Nov-m0099-5p	-
102	Nov-m0100-5p	-
103	Nov-m0101-3p	MIR6158
104	Nov-m0102-5p	-
105	Nov-m0103-3p	-
106	Nov-m0104-5p	-
107	Nov-m0105-5p	-
108	Nov-m0106-5p	-
109	Nov-m0107-3p	MIR5291
110	Nov-m0108-5p	MIR8565
111	Nov-m0109-3p	-
112	Nov-m0110-3p	MIR2587
113	Nov-m0111-5p	MIR7768
114	Nov-m0112-3p	-
115	Nov-m0113-5p	MIR5303
116	Nov-m0115-5p	-
117	Nov-m0116-3p	-
118	Nov-m0117-3p	-
119	Nov-m0118-3p	MIR4371
120	Nov-m0119-3p	MIR2676
121	Nov-m0120-3p	-
122	Nov-m0121-5p	MIR5079
123	Nov-m0122-5p	MIR1082
124	Nov-m0123-3p	MIR475
125	Nov-m0124-3p	MIR2629
126	Nov-m0125-5p	MIR774
127	Nov-m0126-3p	-
128	Nov-m0127-3p	-
129	Nov-m0128-3p	MIR1027
130	Nov-m0129-3p	-
131	Nov-m0129-5p	MIR9674
132	Nov-m0130-5p	-
133	Nov-m0131-5p	MIR9776
134	Nov-m0132-3p	-
135	Nov-m0133-3p	MIR2609
136	Nov-m0134-5p	-
137	Nov-m0135-5p	MIR1887
138	Nov-m0136-5p	MIR827
139	Nov-m0137-5p	-
140	Nov-m0138-5p	-
141	Nov-m0139-3p	MIR5208
142	Nov-m0140-5p	-
143	Nov-m0141-3p	MIR6476
144	Nov-m0142-5p	-
145	Nov-m0143-3p	MIR5208
146	Nov-m0143-5p	MIR4347
147	Nov-m0144-5p	MIR827
148	Nov-m0145-3p	MIR5271
149	Nov-m0146-5p	-
150	Nov-m0147-5p	MIR2676
151	Nov-m0148-3p	-
152	Nov-m0149-3p	-
153	Nov-m0150-3p	MIR4240
154	Nov-m0151-3p	MIR528
155	Nov-m0152-3p	MIR530
156	Nov-m0153-3p	-
157	Nov-m0154-5p	-
158	Nov-m0155-3p	MIR482
159	Nov-m0156-3p	MIR6459
160	Nov-m0157-3p	-
161	Nov-m0157-5p	-
162	Nov-m0158-3p	MIR6135
163	Nov-m0159-3p	MIR2606
164	Nov-m0160-5p	-
165	Nov-m0161-5p	MIR5568
166	Nov-m0162-3p	-
167	Nov-m0163-3p	-
168	Nov-m0164-3p	MIR7506
169	Nov-m0165-3p	-
170	Nov-m0166-5p	-
171	Nov-m0167-3p	-
172	Nov-m0168-3p	-
173	Nov-m0169-3p	-
174	Nov-m0170-3p	MIR4364
175	Nov-m0171-5p	-
176	Nov-m0172-3p	MIR6149
177	Nov-m0173-5p	MIR3980
178	Nov-m0174-3p	MIR1886
179	Nov-m0175-3p	-
180	Nov-m0176-5p	-
181	Nov-m0177-3p	-
182	Nov-m0178-5p	MIR1512
183	Nov-m0179-3p	MIR5568
184	Nov-m0180-3p	MIR5568
185	Nov-m0181-3p	-
186	Nov-m0182-5p	-
187	Nov-m0183-3p	MIR2667
188	Nov-m0184-5p	-
189	Nov-m0185-5p	-
190	Nov-m0186-5p	-
191	Nov-m0187-5p	MIR5062
192	Nov-m0188-5p	MIR5236
193	Nov-m0189-3p	-
194	Nov-m0190-3p	MIR9674
195	Nov-m0191-5p	-
196	Nov-m0192-5p	-
197	Nov-m0193-5p	MIR6145
198	Nov-m0194-3p	MIR158
199	Nov-m0195-3p	MIR6152
200	Nov-m0196-5p	MIR7768
201	Nov-m0197-3p	-
202	Nov-m0198-3p	MIR1219
203	Nov-m0199-3p	-
204	Nov-m0200-5p	MIR7807
205	Nov-m0201-5p	MIR2112
206	Nov-m0202-3p	-
207	Nov-m0203-3p	-
208	Nov-m0204-3p	MIR5565
209	Nov-m0205-3p	MIR7125
210	Nov-m0206-3p	MIR1444
211	Nov-m0207-5p	-
212	Nov-m0208-3p	MIR7993
213	Nov-m0209-3p	MIR1151
214	Nov-m0210-3p	-
215	Nov-m0211-5p	MIR408
216	Nov-m0212-3p	-
217	Nov-m0213-5p	MIR8767
218	Nov-m0214-3p	MIR169_4
219	Nov-m0215-5p	MIR5208
220	Nov-m0216-5p	MIR9672
221	Nov-m0217-3p	MIR2590
222	Nov-m0218-5p	-
223	Nov-m0219-5p	-
224	Nov-m0220-3p	MIR2646
225	Nov-m0221-5p	-
226	Nov-m0222-3p	MIR393
227	Nov-m0223-5p	MIR8710
228	Nov-m0224-3p	-
229	Nov-m0225-3p	MIR814
230	Nov-m0226-3p	-
231	Nov-m0227-5p	-
232	Nov-m0228-3p	-
233	Nov-m0229-3p	MIR810
234	Nov-m0230-3p	MIR7504
235	Nov-m0231-5p	MIR2646
236	Nov-m0232-3p	MIR8663
237	Nov-m0233-3p	MIR952
238	Nov-m0234-5p	MIR9674
239	Nov-m0235-5p	MIR952
240	Nov-m0236-5p	-
241	Nov-m0237-5p	MIR845_1
242	Nov-m0238-5p	MIR814
243	Nov-m0239-5p	-
244	Nov-m0240-3p	MIR858
245	Nov-m0241-5p	-
246	Nov-m0242-5p	MIR2630
247	Nov-m0243-5p	MIR7523
248	Nov-m0244-3p	MIR2647
249	Nov-m0245-3p	-
250	Nov-m0246-3p	MIR394
251	Nov-m0247-3p	MIR8007
252	Nov-m0248-3p	-
253	Nov-m0249-5p	-
254	Nov-m0250-5p	MIR6476
255	Nov-m0251-3p	-
256	Nov-m0252-5p	MIR1435
257	Nov-m0253-3p	-
258	Nov-m0254-3p	-
259	Nov-m0255-3p	MIR7127
260	Nov-m0256-3p	-
261	Nov-m0257-3p	-
262	Nov-m0258-5p	MIR5303
263	Nov-m0259-5p	MIR902
264	Nov-m0260-5p	-
265	Nov-m0261-3p	MIR5271
266	Nov-m0262-3p	MIR5559
267	Nov-m0263-5p	MIR951
268	Nov-m0264-5p	MIR774
269	Nov-m0265-3p	MIR7991
270	Nov-m0266-3p	-
271	Nov-m0267-5p	-
272	Nov-m0268-3p	MIR1026
273	Nov-m0269-5p	-
274	Nov-m0270-5p	MIR5645
275	Nov-m0271-3p	-
276	Nov-m0272-5p	-
277	Nov-m0273-5p	MIR4371
278	Nov-m0274-3p	MIR3932
279	Nov-m0275-3p	MIR2676
280	Nov-m0276-5p	-
281	Nov-m0277-3p	-
282	Nov-m0278-5p	MIR5079
283	Nov-m0279-3p	MIR5157
284	Nov-m0280-3p	MIR1122
285	Nov-m0281-3p	MIR4349
286	Nov-m0282-3p	MIR7696
287	Nov-m0283-3p	MIR169_6
288	Nov-m0284-3p	MIR167_1
289	Nov-m0284-5p	MIR7696
290	Nov-m0285-5p	MIR8710
291	Nov-m0286-5p	-
292	Nov-m0287-5p	-
293	Nov-m0288-5p	MIR2609
294	Nov-m0289-3p	-
295	Nov-m0290-3p	-
296	Nov-m0291-5p	MIR171_1
297	Nov-m0292-3p	MIR9666
298	Nov-m0293-5p	MIR861
299	Nov-m0294-3p	-
300	Nov-m0295-5p	MIR158
301	Nov-m0296-5p	-
302	Nov-m0297-3p	-
303	Nov-m0298-5p	MIR1514
304	Nov-m0299-5p	MIR859
305	Nov-m0300-3p	-
306	Nov-m0301-3p	-
307	Nov-m0302-5p	MIR950
308	Nov-m0303-3p	MIR6274
309	Nov-m0304-5p	-
310	Nov-m0305-3p	-
311	Nov-m0306-3p	-
312	Nov-m0307-3p	-
313	Nov-m0308-3p	MIR7997
314	Nov-m0309-5p	-
315	Nov-m0310-5p	MIR533
316	Nov-m0311-5p	MIR162_1
317	Nov-m0312-3p	-
318	Nov-m0313-3p	MIR950
319	Nov-m0314-5p	MIR7492
320	Nov-m0315-3p	-
321	Nov-m0316-3p	-
322	Nov-m0317-5p	-
323	Nov-m0318-3p	MIR1512
324	Nov-m0319-3p	-
325	Nov-m0320-5p	MIR4380
326	Nov-m0321-5p	MIR8743
327	Nov-m0322-5p	MIR827_2
328	Nov-m0323-3p	-
329	Nov-m0324-5p	MIR827_5
330	Nov-m0325-3p	-
331	Nov-m0326-5p	MIR5062
332	Nov-m0327-5p	-
333	Nov-m0328-3p	MIR5079
334	Nov-m0329-5p	MIR1511
335	Nov-m0330-5p	MIR319
336	Nov-m0331-3p	-
337	Nov-m0332-5p	MIR2676
338	Nov-m0333-3p	MIR2275
339	Nov-m0334-3p	-
340	Nov-m0335-3p	MIR831
341	Nov-m0336-5p	MIR169_6
342	Nov-m0337-3p	MIR3709
343	Nov-m0338-3p	-
344	Nov-m0339-3p	MIR861
345	Nov-m0340-3p	-
346	Nov-m0341-5p	-
347	Nov-m0342-5p	-
348	Nov-m0343-5p	-
349	Nov-m0344-5p	-
350	Nov-m0345-3p	-
351	Nov-m0346-3p	-
352	Nov-m0347-5p	-
353	Nov-m0348-3p	-
354	Nov-m0349-3p	-
355	Nov-m0350-5p	MIR6439
356	Nov-m0351-3p	MIR7729
357	Nov-m0352-3p	-
358	Nov-m0353-3p	MIR7725
359	Nov-m0354-3p	-
360	Nov-m0355-5p	MIR3980
361	Nov-m0356-5p	MIR4998
362	Nov-m0357-5p	-
363	Nov-m0358-3p	-
364	Nov-m0359-5p	MIR7504
365	Nov-m0360-3p	MIR5285
366	Nov-m0361-5p	MIR1435
367	Nov-m0362-5p	MIR1509
368	Nov-m0363-5p	MIR9483
369	Nov-m0364-5p	-
370	Nov-m0365-5p	-
371	Nov-m0366-5p	-
372	Nov-m0367-3p	MIR9552
373	Nov-m0368-3p	MIR168
374	Nov-m0369-5p	MIR5070
375	Nov-m0370-3p	MIR6459
376	Nov-m0371-5p	-
377	Nov-m0372-3p	MIR5236
378	Nov-m0373-3p	MIR950
379	Nov-m0374-5p	MIR5014
380	Nov-m0375-5p	-
381	Nov-m0376-5p	-
382	Nov-m0377-3p	MIR2587
383	Nov-m0378-5p	MIR393
384	Nov-m0379-5p	-
385	Nov-m0380-3p	-
386	Nov-m0381-5p	MIR5565
387	Nov-m0382-5p	MIR8657
388	Nov-m0383-3p	MIR9483
389	Nov-m0384-3p	MIR5084
390	Nov-m0385-5p	MIR6266
391	Nov-m0386-5p	MIR3709
392	Nov-m0387-5p	MIR158
393	Nov-m0388-3p	MIR5079
394	Nov-m0389-3p	MIR5270
395	Nov-m0390-5p	MIR824
396	Nov-m0391-5p	-
397	Nov-m0392-5p	MIR4349
398	Nov-m0393-5p	MIR7997
399	Nov-m0394-3p	MIR7768
400	Nov-m0395-3p	MIR156
401	Nov-m0396-5p	-
402	Nov-m0397-3p	-
403	Nov-m0398-5p	-
404	Nov-m0399-5p	-
405	Nov-m0400-5p	-
406	Nov-m0401-5p	MIR414
407	Nov-m0402-5p	-
408	Nov-m0403-3p	MIR169_4
409	Nov-m0404-3p	-
410	Nov-m0405-5p	-
411	Nov-m0406-5p	-
412	Nov-m0407-5p	MIR3522
413	Nov-m0408-3p	MIR6459
414	Nov-m0409-5p	MIR1063
415	Nov-m0410-5p	MIR2619
416	Nov-m0411-3p	-
417	Nov-m0412-3p	MIR7504
418	Nov-m0413-3p	MIR6267
419	Nov-m0414-5p	MIR5743
420	Nov-m0415-5p	MIR6158
421	Nov-m0416-5p	-
422	Nov-m0417-3p	-
423	Nov-m0418-5p	-
424	Nov-m0419-3p	MIR5200
425	Nov-m0420-3p	MIR164_2
426	Nov-m0421-3p	MIR810
427	Nov-m0422-5p	MIR5241
428	Nov-m0423-3p	MIR2647
429	Nov-m0424-5p	MIR5038
430	Nov-m0425-5p	MIR8024
431	Nov-m0426-3p	-
432	Nov-m0427-5p	-
433	Nov-m0428-3p	-
434	Nov-m0429-5p	-
435	Nov-m0430-5p	-
436	Nov-m0431-5p	-
437	Nov-m0432-3p	MIR951
438	Nov-m0433-3p	MIR1027
439	Nov-m0434-5p	-
440	Nov-m0435-5p	-
441	Nov-m0436-3p	MIR1122
442	Nov-m0437-5p	MIR3932
443	Nov-m0438-5p	MIR1887
444	Nov-m0439-3p	MIR5303
445	Nov-m0440-5p	-
446	Nov-m0441-5p	MIR7984
447	Nov-m0442-3p	MIR8670
448	Nov-m0443-5p	-
449	Nov-m0444-3p	MIR1446
450	Nov-m0445-5p	MIR9666
451	Nov-m0446-5p	-
452	Nov-m0447-5p	-
453	Nov-m0448-3p	MIR9772
454	Nov-m0449-5p	MIR8038
455	Nov-m0450-3p	-
456	Nov-m0451-5p	-
457	Nov-m0452-3p	-
458	Nov-m0453-5p	MIR4371
459	Nov-m0454-5p	-
460	Nov-m0455-3p	-
461	Nov-m0456-5p	MIR530
462	Nov-m0457-5p	MIR529
463	Nov-m0458-3p	MIR7807
464	Nov-m0458-5p	MIR5236
465	Nov-m0459-5p	-
466	Nov-m0460-5p	-
467	Nov-m0461-5p	MIR1514
468	Nov-m0462-5p	-
469	Nov-m0463-5p	-
470	Nov-m0464-3p	MIR5539
471	Nov-m0465-5p	MIR160
472	Nov-m0466-5p	MIR5559
473	Nov-m0467-5p	MIR6201
474	Nov-m0468-3p	MIR1514
475	Nov-m0469-3p	MIR781
476	Nov-m0470-3p	MIR403
477	Nov-m0471-3p	-
478	Nov-m0472-3p	MIR6152
479	Nov-m0473-3p	-
480	Nov-m0474-3p	MIR7757
481	Nov-m0475-3p	-
482	Nov-m0476-5p	MIR814
483	Nov-m0477-3p	-
484	Nov-m0477-5p	MIR4380
485	Nov-m0478-5p	-
486	Nov-m0479-3p	MIR6023
487	Nov-m0480-3p	MIR6146
488	Nov-m0481-3p	-
489	Nov-m0482-3p	MIR5179
490	Nov-m0483-3p	MIR7492
491	Nov-m0484-5p	-
492	Nov-m0485-5p	MIR3704
493	Nov-m0486-3p	MIR5289
494	Nov-m0487-5p	MIR827
495	Nov-m0488-3p	MIR827
496	Nov-m0489-5p	-
497	Nov-m0490-3p	MIR5271
498	Nov-m0491-3p	MIR1514
499	Nov-m0492-3p	MIR1023
500	Nov-m0492-5p	MIR1023
501	Nov-m0493-3p	MIR529
502	Nov-m0494-3p	MIR5020
503	Nov-m0495-3p	MIR950
504	Nov-m0496-5p	-
505	Nov-m0497-5p	MIR950
506	Nov-m0498-3p	MIR1027
507	Nov-m0499-5p	MIR9772
508	Nov-m0500-3p	MIR159
509	Nov-m0501-5p	MIR2655
510	Nov-m0502-5p	MIR5079
511	Nov-m0503-5p	-
512	Nov-m0504-3p	MIR812
513	Nov-m0505-3p	MIR5303
514	Nov-m0506-5p	MIR827_5
515	Nov-m0507-3p	MIR9772
516	Nov-m0508-5p	-
517	Nov-m0509-5p	MIR7996
518	Nov-m0510-5p	-
519	Nov-m0511-5p	MIR6146
520	Nov-m0512-5p	-
521	Nov-m0513-5p	-
522	Nov-m0514-5p	-
523	Nov-m0515-5p	MIR1882
524	Nov-m0516-5p	-
525	Nov-m0517-5p	MIR1882
526	Nov-m0518-5p	MIR8663
527	Nov-m0519-3p	MIR3709
528	Nov-m0520-5p	MIR395
529	Nov-m0521-3p	-
530	Nov-m0522-3p	-
531	Nov-m0523-5p	MIR1886
532	Nov-m0524-5p	MIR6020
533	Nov-m0525-5p	MIR1882
534	Nov-m0526-3p	-
535	Nov-m0527-3p	-
536	Nov-m0528-3p	MIR6149
537	Nov-m0528-5p	-
538	Nov-m0529-5p	-
539	Nov-m0530-3p	MIR2670
540	Nov-m0531-3p	-
541	Nov-m0532-5p	MIR918
542	Nov-m0533-3p	-
543	Nov-m0534-3p	MIR6023
544	Nov-m0535-5p	-
545	Nov-m0536-3p	MIR845_1
546	Nov-m0536-5p	MIR391
547	Nov-m0537-3p	MIR2647
548	Nov-m0538-5p	-
549	Nov-m0539-3p	MIR5272
550	Nov-m0540-3p	MIR4380
551	Nov-m0541-5p	MIR7127
552	Nov-m0542-5p	MIR173
553	Nov-m0543-3p	-
554	Nov-m0544-5p	-
555	Nov-m0545-5p	-
556	Nov-m0546-5p	-
557	Nov-m0547-5p	MIR6024
558	Nov-m0548-3p	MIR918
559	Nov-m0549-3p	-
560	Nov-m0550-3p	MIR827
561	Nov-m0551-3p	-
562	Nov-m0552-3p	-
563	Nov-m0552-5p	MIR5285
564	Nov-m0553-5p	-
565	Nov-m0554-3p	MIR6476
566	Nov-m0555-3p	MIR2609
567	Nov-m0556-3p	-
568	Nov-m0557-3p	-
569	Nov-m0558-5p	MIR1023
570	Nov-m0559-3p	MIR5291
571	Nov-m0560-5p	MIR9552
572	Nov-m0561-5p	MIR827_2
573	Nov-m0562-3p	MIR5998
574	Nov-m0563-3p	MIR7506
575	Nov-m0564-5p	MIR1514
576	Nov-m0565-5p	MIR5079
577	Nov-m0566-3p	MIR3932
578	Nov-m0567-3p	-
579	Nov-m0568-5p	-
580	Nov-m0569-3p	MIR6145
581	Nov-m0570-5p	-
582	Nov-m0571-5p	MIR1878
583	Nov-m0572-3p	MIR7984
584	Nov-m0573-5p	-
585	Nov-m0574-3p	MIR2587
586	Nov-m0575-3p	MIR447
587	Nov-m0576-5p	MIR4380
588	Nov-m0577-5p	MIR481
589	Nov-m0578-5p	MIR5070
590	Nov-m0579-5p	-
591	Nov-m0580-3p	MIR7726
592	Nov-m0581-5p	MIR774
593	Nov-m0582-5p	MIR173
594	Nov-m0583-5p	-
595	Nov-m0584-3p	MIR395
596	Nov-m0585-3p	MIR1120
597	Nov-m0586-3p	MIR5185
598	Nov-m0587-3p	MIR4416
599	Nov-m0588-5p	MIR5539
600	Nov-m0589-5p	MIR828
601	Nov-m0590-3p	MIR2606
602	Nov-m0591-5p	-
603	Nov-m0592-3p	MIR1026
604	Nov-m0593-3p	-
605	Nov-m0594-3p	MIR166
606	Nov-m0595-3p	MIR5067
607	Nov-m0596-3p	-
608	Nov-m0597-3p	MIR6108
609	Nov-m0597-5p	MIR1512
610	Nov-m0598-5p	MIR902
611	Nov-m0599-3p	MIR5291
612	Nov-m0600-5p	MIR5568
613	Nov-m0601-5p	MIR845_1
614	Nov-m0602-5p	MIR6027
615	Nov-m0603-3p	-
616	Nov-m0604-3p	MIR1883
617	Nov-m0605-5p	-
618	Nov-m0606-5p	-
619	Nov-m0607-5p	-
620	Nov-m0608-5p	-
621	Nov-m0609-3p	-
622	Nov-m0610-5p	MIR820
623	Nov-m0611-3p	MIR1027
624	Nov-m0612-3p	MIR1151
625	Nov-m0613-5p	-
626	Nov-m0614-3p	MIR2655
627	Nov-m0615-3p	-
628	Nov-m0616-3p	-
629	Nov-m0617-3p	-
630	Nov-m0618-3p	-
631	Nov-m0619-3p	-
632	Nov-m0620-3p	-
633	Nov-m0621-5p	MIR172
634	Nov-m0622-3p	MIR393
635	Nov-m0623-5p	MIR5534
636	Nov-m0624-3p	-
637	Nov-m0625-5p	MIR160
638	Nov-m0626-3p	MIR845_1
639	Nov-m0627-5p	-
640	Nov-m0628-3p	MIR8703
641	Nov-m0629-5p	-
642	Nov-m0630-5p	MIR7506
643	Nov-m0631-3p	MIR2587
644	Nov-m0632-5p	-
645	Nov-m0633-3p	-
646	Nov-m0634-5p	MIR8703
647	Nov-m0635-5p	-
648	Nov-m0636-5p	-
649	Nov-m0637-5p	-
650	Nov-m0638-5p	-
651	Nov-m0639-3p	MIR1122
652	Nov-m0640-5p	-
653	Nov-m0641-3p	MIR8670
654	Nov-m0642-5p	-
655	Nov-m0643-3p	MIR5770
656	Nov-m0644-5p	-
657	Nov-m0645-3p	MIR9666
658	Nov-m0646-5p	-
659	Nov-m0647-5p	-
660	Nov-m0648-5p	-
661	Nov-m0649-5p	-
662	Nov-m0650-5p	MIR8038
663	Nov-m0651-5p	MIR7486
664	Nov-m0652-3p	-
665	Nov-m0653-5p	-
666	Nov-m0654-3p	MIR5671
667	Nov-m0655-3p	MIR7725
668	Nov-m0656-3p	-
669	Nov-m0657-5p	MIR6023
670	Nov-m0658-5p	MIR168
671	Nov-m0659-3p	MIR5200
672	Nov-m0660-3p	MIR9776
673	Nov-m0660-5p	-
674	Nov-m0661-5p	MIR1878
675	Nov-m0662-5p	MIR856
676	Nov-m0663-5p	-
677	Nov-m0664-3p	MIR1514
678	Nov-m0665-5p	-
679	Nov-m0666-5p	MIR5285
680	Nov-m0667-5p	MIR9776
681	Nov-m0668-5p	MIR1144
682	Nov-m0669-5p	-
683	Nov-m0670-3p	MIR5062
684	Nov-m0671-5p	MIR1082
685	Nov-m0672-3p	-
686	Nov-m0673-5p	-
687	Nov-m0674-5p	-
688	Nov-m0675-5p	MIR1313
689	Nov-m0676-5p	-
690	Nov-m0677-5p	-
691	Nov-m0678-5p	-
692	Nov-m0679-5p	MIR4416
693	Nov-m0680-3p	MIR7486
694	Nov-m0681-5p	MIR5671
695	Nov-m0682-5p	-
696	Nov-m0683-3p	-
697	Nov-m0684-3p	MIR5169
698	Nov-m0685-3p	-
699	Nov-m0686-3p	MIR7996
700	Nov-m0687-3p	MIR4221
701	Nov-m0688-5p	-
702	Nov-m0689-5p	-
703	Nov-m0690-5p	-
704	Nov-m0691-5p	MIR2592
705	Nov-m0692-3p	-
706	Nov-m0692-5p	MIR5285
707	Nov-m0693-5p	-
708	Nov-m0694-5p	MIR1031
709	Nov-m0695-3p	MIR7996
710	Nov-m0696-3p	MIR9776
711	Nov-m0697-5p	-
712	Nov-m0698-5p	MIR1428
713	Nov-m0699-5p	-
714	Nov-m0700-3p	MIR1435
715	Nov-m0701-5p	-
716	Nov-m0702-5p	MIR2606
717	Nov-m0703-3p	-
718	Nov-m0704-5p	MIR5048
719	Nov-m0705-5p	MIR2629
720	Nov-m0706-3p	-
721	Nov-m0707-5p	MIR814
722	Nov-m0708-5p	MIR8038
723	Nov-m0709-3p	MIR6152
724	Nov-m0710-5p	-
725	Nov-m0711-5p	MIR8703
726	Nov-m0712-5p	-
727	Nov-m0713-3p	-
728	Nov-m0714-3p	MIR538
729	Nov-m0715-5p	-
730	Nov-m0716-5p	-
731	Nov-m0717-3p	-
732	Nov-m0718-3p	MIR2646
733	Nov-m0719-3p	MIR1219
734	Nov-m0720-5p	MIR9776
735	Nov-m0721-5p	-
736	Nov-m0722-5p	-
737	Nov-m0723-3p	MIR168
738	Nov-m0724-3p	MIR4221
739	Nov-m0725-3p	MIR5998
740	Nov-m0726-3p	MIR4221
741	Nov-m0727-5p	MIR5241
742	Nov-m0728-3p	MIR3709
743	Nov-m0729-3p	-
744	Nov-m0730-3p	MIR5163
745	Nov-m0731-3p	-
746	Nov-m0732-3p	MIR478
747	Nov-m0733-5p	MIR4371
748	Nov-m0734-3p	-
749	Nov-m0735-3p	MIR5780
750	Nov-m0736-5p	MIR7510
751	Nov-m0737-3p	-
752	Nov-m0738-3p	-
753	Nov-m0739-5p	-
754	Nov-m0740-3p	MIR6274
755	Nov-m0741-3p	-
756	Nov-m0742-5p	MIR2600
757	Nov-m0743-3p	MIR169_6
758	Nov-m0744-3p	-
759	Nov-m0745-3p	MIR5272
760	Nov-m0746-3p	-
761	Nov-m0746-5p	MIR6020
762	Nov-m0747-3p	MIR3709
763	Nov-m0748-3p	MIR5079
764	Nov-m0749-3p	MIR1878
765	Nov-m0750-3p	MIR5304
766	Nov-m0751-3p	MIR5303
767	Nov-m0752-3p	-
768	Nov-m0753-5p	MIR4240
769	Nov-m0754-3p	-
770	Nov-m0755-3p	MIR5079
771	Nov-m0756-5p	-
772	Nov-m0757-3p	-
773	Nov-m0758-5p	MIR2588
774	Nov-m0759-3p	MIR4364
775	Nov-m0760-5p	MIR1435
776	Nov-m0761-5p	MIR814
777	Nov-m0762-3p	MIR5565
778	Nov-m0763-3p	MIR1886
779	Nov-m0764-5p	MIR7532
780	Nov-m0765-5p	-
781	Nov-m0766-3p	MIR6108
782	Nov-m0767-3p	MIR831
783	Nov-m0768-5p	MIR2934
784	Nov-m0769-3p	MIR5745
785	Nov-m0770-3p	-
786	Nov-m0771-5p	-
787	Nov-m0772-5p	MIR167_1
788	Nov-m0773-3p	MIR166
789	Nov-m0774-3p	MIR3704
790	Nov-m0775-3p	MIR2592
791	Nov-m0776-3p	MIR1883
792	Nov-m0777-3p	MIR158
793	Nov-m0778-3p	-
794	Nov-m0779-3p	-
795	Nov-m0780-3p	-
796	Nov-m0781-5p	-
797	Nov-m0782-5p	-
798	Nov-m0783-3p	MIR6288
799	Nov-m0783-5p	MIR781
800	Nov-m0784-5p	-
801	Nov-m0785-3p	MIR8007
802	Nov-m0786-5p	MIR1435
803	Nov-m0787-3p	-
804	Nov-m0788-3p	-
805	Nov-m0789-3p	MIR1144
806	Nov-m0790-5p	MIR5303
807	Nov-m0791-5p	MIR7506
808	Nov-m0792-3p	MIR1887
809	Nov-m0793-3p	-
810	Nov-m0794-3p	-
811	Nov-m0795-5p	MIR8038
812	Nov-m0796-3p	MIR2670
813	Nov-m0797-3p	-
814	Nov-m0798-3p	MIR1027
815	Nov-m0799-5p	MIR771
816	Nov-m0800-5p	-
817	Nov-m0801-3p	MIR1027
818	Nov-m0802-3p	-
819	Nov-m0803-3p	-
820	Nov-m0804-3p	-
821	Nov-m0805-5p	MIR535
822	Nov-m0806-5p	MIR7997
823	Nov-m0807-3p	MIR5038
824	Nov-m0808-3p	MIR859
825	Nov-m0809-3p	MIR6152
826	Nov-m0810-3p	MIR9772
827	Nov-m0811-3p	-
828	Nov-m0812-3p	-
829	Nov-m0813-5p	-
830	Nov-m0814-5p	MIR533
831	Nov-m0815-3p	MIR5559
832	Nov-m0816-5p	-
833	Nov-m0817-3p	MIR158
834	Nov-m0818-5p	MIR2275
835	Nov-m0819-5p	MIR5236
836	Nov-m0820-5p	MIR5067
837	Nov-m0821-3p	MIR2934
838	Nov-m0822-5p	-
839	Nov-m0823-5p	-
840	Nov-m0824-3p	MIR2670
841	Nov-m0825-5p	MIR5559
842	Nov-m0826-3p	MIR8653
843	Nov-m0827-3p	-
844	Nov-m0828-5p	MIR7984
845	Nov-m0829-3p	-
846	Nov-m0830-3p	-
847	Nov-m0831-3p	MIR2109
848	Nov-m0832-3p	MIR7997
849	Nov-m0833-3p	-
850	Nov-m0834-3p	MIR7996
851	Nov-m0835-3p	MIR2112
852	Nov-m0836-5p	MIR3980
853	Nov-m0837-5p	-
854	Nov-m0838-5p	-
855	Nov-m0839-5p	MIR393
856	Nov-m0840-5p	-
857	Nov-m0841-5p	MIR8767
858	Nov-m0842-5p	MIR1919
859	Nov-m0843-5p	MIR834
860	Nov-m0844-5p	MIR3932
861	Nov-m0845-5p	MIR3440
862	Nov-m0846-3p	-
863	Nov-m0847-5p	MIR1219
864	Nov-m0848-5p	MIR168
865	Nov-m0849-3p	MIR859
866	Nov-m0850-5p	-
867	Nov-m0851-3p	-
868	Nov-m0852-5p	-
869	Nov-m0853-3p	MIR8706
870	Nov-m0854-3p	MIR2907
871	Nov-m0855-5p	-
872	Nov-m0856-3p	-
873	Nov-m0857-5p	MIR4227
874	Nov-m0858-5p	MIR6151
875	Nov-m0859-5p	MIR9677
876	Nov-m0860-5p	-
877	Nov-m0861-5p	MIR7997
878	Nov-m0862-5p	-
879	Nov-m0863-3p	MIR831
880	Nov-m0864-5p	MIR812
881	Nov-m0865-3p	MIR774
882	Nov-m0866-5p	MIR1886
883	Nov-m0867-5p	-
884	Nov-m0868-3p	-
885	Nov-m0869-5p	-
886	Nov-m0870-3p	-
887	Nov-m0871-3p	-
888	Nov-m0872-5p	MIR828
889	Nov-m0873-5p	MIR2587
890	Nov-m0874-5p	MIR1888
891	Nov-m0875-3p	MIR1446
892	Nov-m0876-5p	MIR902
893	Nov-m0877-5p	-
894	Nov-m0878-3p	MIR857
895	Nov-m0879-3p	-
896	Nov-m0880-3p	MIR5564
897	Nov-m0881-3p	-
898	Nov-m0882-5p	-
899	Nov-m0883-5p	-
900	Nov-m0884-5p	MIR397
901	Nov-m0885-5p	MIR9483
902	Nov-m0886-3p	MIR5067
903	Nov-m0887-5p	-
904	Nov-m0888-5p	MIR8007
905	Nov-m0889-5p	-
906	Nov-m0890-5p	MIR399
907	Nov-m0891-5p	MIR6026
908	Nov-m0892-3p	MIR7492
909	Nov-m0893-5p	MIR824
910	Nov-m0894-3p	-
911	Nov-m0895-5p	-
912	Nov-m0896-5p	-
913	Nov-m0897-3p	MIR5565
914	Nov-m0898-3p	MIR5179
915	Nov-m0899-3p	MIR172
916	Nov-m0900-3p	MIR828
917	Nov-m0901-3p	MIR1432
918	Nov-m0902-5p	-
919	Nov-m0903-5p	MIR529
920	Nov-m0904-3p	-
921	Nov-m0905-5p	-
922	Nov-m0906-3p	-
923	Nov-m0906-5p	-
924	Nov-m0907-5p	MIR828
925	Nov-m0908-5p	MIR4356
926	Nov-m0909-3p	MIR7125
927	Nov-m0910-5p	-
928	Nov-m0911-3p	-
929	Nov-m0912-5p	-
930	Nov-m0913-3p	-
931	Nov-m0914-3p	MIR7504
932	Nov-m0915-3p	MIR5304
933	Nov-m0916-3p	-
934	Nov-m0917-3p	MIR6027
935	Nov-m0918-3p	-
936	Nov-m0919-3p	-
937	Nov-m0920-5p	-
938	Nov-m0921-5p	MIR856
939	Nov-m0922-3p	MIR9657
940	Nov-m0923-3p	MIR6217
941	Nov-m0924-3p	MIR2907
942	Nov-m0925-5p	-
943	Nov-m0926-3p	MIR5645
944	Nov-m0927-3p	-
945	Nov-m0928-5p	-
946	Nov-m0929-5p	-
947	Nov-m0930-5p	MIR8653
948	Nov-m0931-3p	MIR5770
949	Nov-m0932-3p	MIR5271
950	Nov-m0933-3p	MIR3522
951	Nov-m0934-5p	MIR3980
952	Nov-m0935-3p	-
953	Nov-m0936-5p	MIR1887
954	Nov-m0937-5p	MIR5285
955	Nov-m0938-5p	MIR5235
956	Nov-m0939-3p	MIR3709
957	Nov-m0940-3p	MIR7768
958	Nov-m0941-5p	MIR4240
959	Nov-m0942-3p	-
960	Nov-m0943-5p	-
961	Nov-m0944-3p	-
962	Nov-m0945-3p	MIR5208
963	Nov-m0946-5p	-
964	Nov-m0947-3p	-
965	Nov-m0948-5p	-
966	Nov-m0949-5p	MIR5564
967	Nov-m0950-5p	MIR482
968	Nov-m0951-3p	-
969	Nov-m0952-3p	-
970	Nov-m0953-5p	MIR168
971	Nov-m0954-5p	-
972	Nov-m0955-3p	MIR171_2
973	Nov-m0956-3p	MIR2667
974	Nov-m0957-3p	MIR4240
975	Nov-m0958-5p	MIR1888
976	Nov-m0959-3p	MIR5559
977	Nov-m0960-5p	MIR2655
978	Nov-m0961-3p	MIR827
979	Nov-m0962-3p	MIR158
980	Nov-m0963-5p	MIR4221
981	Nov-m0964-3p	MIR1435
982	Nov-m0965-5p	MIR4347
983	Nov-m0966-3p	-
984	Nov-m0967-5p	MIR169_5
985	Nov-m0968-3p	-
986	Nov-m0969-3p	MIR393
987	Nov-m0970-5p	MIR1882
988	Nov-m0971-5p	MIR9776
989	Nov-m0972-3p	MIR169_5
990	Nov-m0973-5p	-
991	Nov-m0974-5p	MIR4364
992	Nov-m0975-3p	MIR4221
993	Nov-m0976-3p	MIR6152
994	Nov-m0977-3p	MIR5534
995	Nov-m0978-5p	-
996	Nov-m0979-3p	MIR319
997	Nov-m0980-5p	-
998	Nov-m0981-5p	-
999	Nov-m0982-5p	MIR1122
1000	Nov-m0983-5p	MIR7121
1001	Nov-m0984-3p	-
1002	Nov-m0985-3p	-
1003	Nov-m0986-5p	MIR7984
1004	Nov-m0987-5p	MIR390
1005	Nov-m0988-3p	-
1006	Nov-m0989-3p	-
1007	Nov-m0990-3p	MIR535
1008	Nov-m0991-3p	MIR9677
1009	Nov-m0992-3p	MIR5565
1010	Nov-m0993-5p	MIR6025
1011	Nov-m0994-3p	MIR5208
1012	Nov-m0995-3p	-
1013	Nov-m0996-5p	-
1014	Nov-m0997-3p	MIR5048
1015	Nov-m0998-3p	-
1016	Nov-m0999-5p	-
1017	Nov-m1000-5p	-
1018	Nov-m1001-5p	MIR952
1019	Nov-m1002-3p	-
1020	Nov-m1003-5p	MIR1063
1021	Nov-m1004-5p	-
1022	Nov-m1005-5p	-
1023	Nov-m1006-3p	MIR4221
1024	Nov-m1007-3p	MIR950
1025	Nov-m1008-5p	MIR5534
1026	Nov-m1009-5p	MIR158
1027	Nov-m1010-5p	MIR7997
1028	Nov-m1011-5p	-
1029	Nov-m1012-5p	-
1030	Nov-m1013-3p	MIR2609
1031	Nov-m1014-5p	MIR3522
1032	Nov-m1015-5p	-
1033	Nov-m1016-5p	MIR2630
1034	Nov-m1017-3p	-
1035	Nov-m1018-5p	-
1036	Nov-m1019-3p	-
1037	Nov-m1020-3p	-
1038	Nov-m1021-5p	MIR7729
1039	Nov-m1022-5p	MIR820
1040	Nov-m1023-5p	MIR5208
1041	Nov-m1024-3p	-
1042	Nov-m1025-3p	-
1043	Nov-m1026-3p	-
1044	Nov-m1027-5p	-
1045	Nov-m1028-3p	-
1046	Nov-m1029-3p	-
1047	Nov-m1030-3p	MIR7725
1048	Nov-m1031-3p	-
1049	Nov-m1032-3p	-
1050	Nov-m1032-5p	-
1051	Nov-m1033-5p	-
1052	Nov-m1034-3p	MIR827_2
1053	Nov-m1035-3p	MIR1122
1054	Nov-m1036-3p	-
1055	Nov-m1037-5p	-
1056	Nov-m1038-3p	MIR1030
1057	Nov-m1039-3p	MIR4371
1058	Nov-m1040-3p	-
1059	Nov-m1041-3p	MIR1878
1060	Nov-m1042-3p	MIR2112
1061	Nov-m1043-5p	MIR5565
1062	Nov-m1044-3p	-
1063	Nov-m1045-5p	MIR533
1064	Nov-m1046-5p	MIR6288
1065	Nov-m1047-3p	MIR533
1066	Nov-m1048-3p	MIR403
1067	Nov-m1049-3p	MIR5038
1068	Nov-m1050-5p	-
1069	Nov-m1051-5p	MIR8743
1070	Nov-m1052-5p	MIR7997
1071	Nov-m1053-5p	MIR7696
1072	Nov-m1054-5p	MIR1120
1073	Nov-m1055-5p	-
1074	Nov-m1056-3p	MIR7768
1075	Nov-m1057-3p	MIR478
1076	Nov-m1058-3p	-
1077	Nov-m1059-3p	-
1078	Nov-m1060-3p	MIR1878
1079	Nov-m1061-5p	-
1080	Nov-m1062-5p	MIR5291
1081	Nov-m1063-5p	MIR398
1082	Nov-m1064-5p	-
1083	Nov-m1065-3p	MIR7768
1084	Nov-m1066-3p	MIR4240
1085	Nov-m1067-5p	-
1086	Nov-m1068-5p	-
1087	Nov-m1069-3p	-
1088	Nov-m1070-5p	MIR845_1
1089	Nov-m1071-5p	MIR2670
1090	Nov-m1072-3p	MIR7523
1091	Nov-m1073-5p	MIR950
1092	Nov-m1074-3p	MIR6151
1093	Nov-m1074-5p	MIR2655
1094	Nov-m1075-3p	MIR6025
1095	Nov-m1076-3p	MIR812
1096	Nov-m1077-5p	-
1097	Nov-m1078-3p	-
1098	Nov-m1079-5p	-
1099	Nov-m1080-3p	-
1100	Nov-m1081-5p	MIR5084
1101	Nov-m1082-5p	MIR158
1102	Nov-m1083-5p	MIR6025
1103	Nov-m1084-3p	-
1104	Nov-m1085-5p	MIR156
1105	Nov-m1086-3p	MIR1313
1106	Nov-m1087-3p	MIR820
1107	Nov-m1088-3p	MIR5671
1108	Nov-m1089-3p	MIR3627
1109	Nov-m1090-3p	MIR5241
1110	Nov-m1091-5p	MIR5157
1111	Nov-m1092-5p	MIR1513
1112	Nov-m1093-5p	MIR6152
1113	Nov-m1094-5p	MIR820
1114	Nov-m1095-5p	MIR162_2
1115	Nov-m1096-3p	-
1116	Nov-m1097-3p	-
1117	Nov-m1098-5p	-
1118	Nov-m1099-3p	MIR8024
1119	Nov-m1100-3p	-
1120	Nov-m1101-5p	MIR6266
1121	Nov-m1102-5p	MIR7510
1122	Nov-m1103-3p	-
1123	Nov-m1104-3p	-
1124	Nov-m1105-3p	-
1125	Nov-m1106-3p	MIR6025
1126	Nov-m1107-5p	MIR7121
1127	Nov-m1108-3p	MIR2646
1128	Nov-m1109-3p	-
1129	Nov-m1110-3p	-
1130	Nov-m1111-3p	MIR2592
1131	Nov-m1112-5p	MIR5079
1132	Nov-m1113-5p	-
1133	Nov-m1114-3p	MIR5062
1134	Nov-m1115-5p	-
1135	Nov-m1116-5p	MIR2599
1136	Nov-m1117-5p	MIR6288
1137	Nov-m1118-3p	MIR5079
1138	Nov-m1119-3p	MIR5285
1139	Nov-m1120-5p	-
1140	Nov-m1121-3p	MIR1063
1141	Nov-m1122-5p	MIR812
1142	Nov-m1123-5p	MIR5645
1143	Nov-m1124-5p	MIR5272
1144	Nov-m1125-3p	-
1145	Nov-m1126-5p	-
1146	Nov-m1127-3p	MIR5780
1147	Nov-m1128-3p	MIR8565
1148	Nov-m1129-3p	MIR414
1149	Nov-m1130-3p	MIR5225
1150	Nov-m1131-5p	-
1151	Nov-m1132-3p	MIR7510
1152	Nov-m1133-5p	-
1153	Nov-m1134-3p	MIR475
1154	Nov-m1135-5p	MIR5745
1155	Nov-m1136-3p	MIR475
1156	Nov-m1137-3p	MIR5185
1157	Nov-m1138-5p	-
1158	Nov-m1139-3p	-
1159	Nov-m1140-5p	MIR5241
1160	Nov-m1141-3p	MIR4208
1161	Nov-m1142-3p	MIR781
1162	Nov-m1143-3p	-
1163	Nov-m1144-3p	-
1164	Nov-m1144-5p	-
1165	Nov-m1145-5p	MIR5062
1166	Nov-m1146-5p	MIR5272
1167	Nov-m1147-3p	MIR5157
1168	Nov-m1148-3p	-
1169	Nov-m1149-5p	-
1170	Nov-m1150-5p	MIR2670
1171	Nov-m1151-3p	MIR7492
1172	Nov-m1152-5p	-
1173	Nov-m1153-3p	MIR8762
1174	Nov-m1154-5p	-
1175	Nov-m1155-5p	-
1176	Nov-m1156-3p	MIR5179
1177	Nov-m1157-3p	MIR5048
1178	Nov-m1158-3p	MIR2600
1179	Nov-m1159-3p	-
1180	Nov-m1160-3p	-
1181	Nov-m1161-3p	MIR825
1182	Nov-m1162-5p	-
1183	Nov-m1163-3p	MIR7757
1184	Nov-m1164-3p	MIR7523
1185	Nov-m1165-5p	MIR5062
1186	Nov-m1166-5p	-
1187	Nov-m1167-3p	MIR1846
1188	Nov-m1168-3p	MIR3709
1189	Nov-m1169-3p	-
1190	Nov-m1170-3p	MIR845_1
1191	Nov-m1171-3p	MIR952
1192	Nov-m1171-5p	-
1193	Nov-m1172-5p	-
1194	Nov-m1173-3p	-
1195	Nov-m1174-5p	MIR5062
1196	Nov-m1175-5p	MIR1435
1197	Nov-m1176-5p	-
1198	Nov-m1177-5p	MIR3980
1199	Nov-m1178-5p	MIR947
1200	Nov-m1179-3p	MIR535
1201	Nov-m1180-3p	MIR947
1202	Nov-m1181-3p	-
1203	Nov-m1182-3p	MIR5595
1204	Nov-m1183-3p	MIR861
1205	Nov-m1184-5p	-
1206	Nov-m1185-3p	MIR403
1207	Nov-m1186-3p	MIR3709
1208	Nov-m1187-3p	MIR828
1209	Nov-m1188-5p	MIR834
1210	Nov-m1189-3p	-
1211	Nov-m1190-5p	MIR2647
1212	Nov-m1191-5p	MIR5559
1213	Nov-m1192-3p	MIR1861
1214	Nov-m1193-3p	-
1215	Nov-m1194-3p	MIR8139
1216	Nov-m1195-5p	-
1217	Nov-m1196-5p	-
1218	Nov-m1197-5p	MIR6023
1219	Nov-m1198-5p	-
1220	Nov-m1199-5p	MIR1319
1221	Nov-m1200-5p	MIR1435
1222	Nov-m1201-5p	-
1223	Nov-m1202-5p	MIR6439
1224	Nov-m1203-5p	MIR5268
1225	Nov-m1204-5p	-
1226	Nov-m1205-5p	-
1227	Nov-m1206-3p	MIR1514
1228	Nov-m1207-3p	MIR169_6
1229	Nov-m1207-5p	MIR5267
1230	Nov-m1208-5p	-
1231	Nov-m1209-3p	MIR5743
1232	Nov-m1210-5p	MIR4364
1233	Nov-m1211-3p	-
1234	Nov-m1212-5p	MIR8653
1235	Nov-m1213-3p	MIR857
1236	Nov-m1214-3p	MIR2587
1237	Nov-m1215-3p	-
1238	Nov-m1216-5p	MIR820
1239	Nov-m1217-3p	MIR172
1240	Nov-m1218-3p	-
1241	Nov-m1219-5p	-
1242	Nov-m1220-5p	MIR831
1243	Nov-m1221-3p	-
1244	Nov-m1222-5p	-
1245	Nov-m1223-3p	-
1246	Nov-m1224-3p	MIR7523
1247	Nov-m1225-5p	MIR529
1248	Nov-m1226-3p	-
1249	Nov-m1227-5p	MIR7492
1250	Nov-m1228-5p	MIR5289
1251	Nov-m1229-3p	-
1252	Nov-m1230-3p	-
1253	Nov-m1231-5p	-
1254	Nov-m1232-3p	-
1255	Nov-m1233-5p	MIR390
1256	Nov-m1234-3p	MIR8703
1257	Nov-m1235-3p	MIR4998
1258	Nov-m1236-5p	MIR1846
1259	Nov-m1237-5p	MIR2630
1260	Nov-m1238-5p	-
1261	Nov-m1239-5p	-
1262	Nov-m1240-5p	MIR5671
1263	Nov-m1241-3p	MIR403
1264	Nov-m1242-5p	-
1265	Nov-m1243-5p	MIR952
1266	Nov-m1244-5p	-
1267	Nov-m1245-5p	MIR5780
1268	Nov-m1246-3p	MIR5225
1269	Nov-m1247-3p	MIR7127
1270	Nov-m1248-5p	-
1271	Nov-m1249-3p	MIR814
1272	Nov-m1250-3p	-
1273	Nov-m1251-3p	MIR7510
1274	Nov-m1252-5p	MIR4208
1275	Nov-m1253-5p	-
1276	Nov-m1254-5p	MIR8767
1277	Nov-m1255-5p	MIR781
1278	Nov-m1256-3p	-
1279	Nov-m1257-5p	MIR5998
1280	Nov-m1258-3p	-
1281	Nov-m1259-3p	MIR9552
1282	Nov-m1260-3p	MIR169_6
1283	Nov-m1261-5p	-
1284	Nov-m1262-3p	-
1285	Nov-m1263-3p	-
1286	Nov-m1264-5p	-
1287	Nov-m1265-3p	MIR1511
1288	Nov-m1266-5p	MIR2647
1289	Nov-m1267-3p	MIR6025
1290	Nov-m1268-5p	MIR827_5
1291	Nov-m1269-5p	-
1292	Nov-m1270-3p	MIR3704
1293	Nov-m1271-3p	-
1294	Nov-m1272-3p	MIR5241
1295	Nov-m1273-3p	MIR3709
1296	Nov-m1274-5p	MIR1151
1297	Nov-m1275-3p	MIR1435
1298	Nov-m1276-3p	MIR1435
1299	Nov-m1277-3p	MIR159
1300	Nov-m1278-5p	-
1301	Nov-m1279-3p	MIR1027
1302	Nov-m1280-5p	MIR7997
1303	Nov-m1281-5p	MIR9672
1304	Nov-m1282-5p	MIR5534
1305	Nov-m1283-5p	-
1306	Nov-m1284-3p	-
1307	Nov-m1285-3p	MIR7532
1308	Nov-m1286-3p	-
1309	Nov-m1287-5p	MIR7484
1310	Nov-m1288-3p	MIR1219
1311	Nov-m1289-3p	MIR7510
1312	Nov-m1290-3p	MIR951
1313	Nov-m1291-3p	-
1314	Nov-m1292-3p	MIR5671
1315	Nov-m1293-5p	MIR7725
1316	Nov-m1294-3p	MIR9560
1317	Nov-m1295-5p	MIR5774
1318	Nov-m1296-5p	MIR7127
1319	Nov-m1297-3p	MIR835
1320	Nov-m1298-5p	-
1321	Nov-m1299-3p	MIR7121
1322	Nov-m1300-5p	MIR7726
1323	Nov-m1301-5p	MIR2109
1324	Nov-m1302-3p	MIR5235
1325	Nov-m1303-3p	MIR5062
1326	Nov-m1304-5p	MIR2275
1327	Nov-m1305-3p	MIR831
1328	Nov-m1306-5p	-
1329	Nov-m1307-3p	-
1330	Nov-m1308-5p	MIR5780
1331	Nov-m1309-5p	MIR1031
1332	Nov-m1310-3p	-
1333	Nov-m1311-3p	MIR4243
1334	Nov-m1312-3p	MIR7996
1335	Nov-m1313-3p	MIR529
1336	Nov-m1314-3p	-
1337	Nov-m1315-5p	-
1338	Nov-m1316-5p	MIR771
1339	Nov-m1317-5p	MIR828
1340	Nov-m1318-5p	MIR173
1341	Nov-m1319-5p	MIR8743
1342	Nov-m1320-3p	-
1343	Nov-m1321-5p	-
1344	Nov-m1322-3p	MIR5241
1345	Nov-m1323-5p	MIR835
1346	Nov-m1324-3p	MIR6274
1347	Nov-m1324-5p	-
1348	Nov-m1325-5p	-
1349	Nov-m1326-5p	-
1350	Nov-m1327-5p	-
1351	Nov-m1328-5p	-
1352	Nov-m1329-3p	MIR398
1353	Nov-m1330-3p	MIR1878
1354	Nov-m1330-5p	-
1355	Nov-m1331-3p	-
1356	Nov-m1332-5p	MIR862
1357	Nov-m1333-5p	-
1358	Nov-m1334-5p	-
1359	Nov-m1335-5p	-
1360	Nov-m1336-5p	MIR5062
1361	Nov-m1337-3p	-
1362	Nov-m1338-3p	-
1363	Nov-m1339-3p	-
1364	Nov-m1340-5p	MIR7484
1365	Nov-m1341-5p	MIR5285
1366	Nov-m1342-5p	MIR7717
1367	Nov-m1343-3p	MIR5559
1368	Nov-m1344-3p	-
1369	Nov-m1345-3p	-
1370	Nov-m1346-3p	MIR862
1371	Nov-m1347-3p	-
1372	Nov-m1348-5p	MIR2111
1373	Nov-m1349-5p	MIR167_1
1374	Nov-m1350-3p	-
1375	Nov-m1351-3p	-
1376	Nov-m1352-3p	MIR6158
1377	Nov-m1353-3p	MIR2606
1378	Nov-m1354-3p	MIR529
1379	Nov-m1355-3p	MIR5235
1380	Nov-m1356-3p	-
1381	Nov-m1357-3p	MIR162_2
1382	Nov-m1358-5p	MIR918
1383	Nov-m1359-3p	-
1384	Nov-m1360-3p	MIR2600
1385	Nov-m1361-3p	MIR529
1386	Nov-m1362-3p	-
1387	Nov-m1363-3p	MIR5079
1388	Nov-m1364-5p	MIR3932
1389	Nov-m1365-5p	-
1390	Nov-m1366-5p	MIR1887
1391	Nov-m1367-3p	MIR2934
1392	Nov-m1368-5p	-
1393	Nov-m1369-3p	MIR530
1394	Nov-m1370-3p	-
1395	Nov-m1371-3p	MIR5770
1396	Nov-m1372-3p	-
1397	Nov-m1373-5p	MIR7996
1398	Nov-m1374-3p	MIR1219
1399	Nov-m1375-3p	MIR827
1400	Nov-m1376-5p	MIR812
1401	Nov-m1377-5p	-
1402	Nov-m1378-5p	-
1403	Nov-m1379-5p	MIR5745
1404	Nov-m1380-5p	MIR1122
1405	Nov-m1381-3p	MIR7708
1406	Nov-m1382-5p	MIR391
1407	Nov-m1383-3p	MIR1514
1408	Nov-m1384-5p	-
1409	Nov-m1385-3p	-
1410	Nov-m1386-5p	-
1411	Nov-m1387-5p	-
1412	Nov-m1388-3p	MIR5291
1413	Nov-m1389-5p	MIR7121
1414	Nov-m1390-3p	-
1415	Nov-m1391-3p	MIR834
1416	Nov-m1392-3p	-
1417	Nov-m1393-5p	-
1418	Nov-m1394-3p	MIR6135
1419	Nov-m1395-3p	MIR6439
1420	Nov-m1396-3p	-
1421	Nov-m1397-5p	-
1422	Nov-m1398-5p	MIR168
1423	Nov-m1399-3p	MIR2629
1424	Nov-m1400-3p	-
1425	Nov-m1401-5p	-
1426	Nov-m1402-5p	MIR8703
1427	Nov-m1403-5p	-
1428	Nov-m1404-3p	MIR2934
1429	Nov-m1405-3p	-
1430	Nov-m1406-5p	-
1431	Nov-m1407-3p	MIR5780
1432	Nov-m1408-3p	MIR393
1433	Nov-m1409-3p	MIR8706
1434	Nov-m1410-5p	MIR5185
1435	Nov-m1411-3p	MIR1435
1436	Nov-m1412-5p	-
1437	Nov-m1413-5p	-
1438	Nov-m1414-3p	MIR398
1439	Nov-m1415-5p	MIR477
1440	Nov-m1416-5p	MIR1435
1441	Nov-m1417-3p	-
1442	Nov-m1418-5p	-
1443	Nov-m1419-5p	MIR828
1444	Nov-m1420-5p	MIR4371
1445	Nov-m1421-5p	-
1446	Nov-m1422-3p	MIR951
1447	Nov-m1423-3p	MIR474
1448	Nov-m1424-3p	-
1449	Nov-m1425-3p	MIR6025
1450	Nov-m1426-5p	MIR3440
1451	Nov-m1427-5p	MIR7484
1452	Nov-m1428-3p	MIR859
1453	Nov-m1429-5p	-
1454	Nov-m1430-5p	MIR8757
1455	Nov-m1431-3p	MIR5067
1456	Nov-m1432-3p	-
1457	Nov-m1433-3p	MIR1919
1458	Nov-m1434-3p	-
1459	Nov-m1435-3p	-
1460	Nov-m1436-3p	MIR947
1461	Nov-m1437-3p	MIR6274
1462	Nov-m1438-3p	MIR159
1463	Nov-m1439-3p	MIR166
1464	Nov-m1440-5p	-
1465	Nov-m1441-3p	MIR5595
1466	Nov-m1442-3p	-
1467	Nov-m1443-3p	MIR1878
1468	Nov-m1444-3p	MIR1514
1469	Nov-m1445-5p	MIR5079
1470	Nov-m1446-3p	-
1471	Nov-m1447-3p	-
1472	Nov-m1448-3p	-
1473	Nov-m1448-5p	MIR949
1474	Nov-m1449-5p	-
1475	Nov-m1450-5p	MIR2588
1476	Nov-m1451-3p	-
1477	Nov-m1452-5p	-
1478	Nov-m1453-5p	MIR1882
1479	Nov-m1454-5p	MIR862
1480	Nov-m1455-3p	MIR4374
1481	Nov-m1456-5p	MIR7984
1482	Nov-m1457-5p	-
1483	Nov-m1458-5p	MIR7127
1484	Nov-m1459-3p	MIR2275
1485	Nov-m1460-5p	-
1486	Nov-m1461-5p	MIR7492
1487	Nov-m1462-3p	MIR164_2
1488	Nov-m1463-3p	MIR7807
1489	Nov-m1464-5p	MIR5743
1490	Nov-m1465-5p	MIR2629
1491	Nov-m1466-5p	MIR9776
1492	Nov-m1467-3p	-
1493	Nov-m1468-3p	MIR319
1494	Nov-m1469-5p	MIR4240
1495	Nov-m1470-5p	-
1496	Nov-m1471-5p	MIR1122
1497	Nov-m1472-5p	MIR1151
1498	Nov-m1473-3p	MIR7708
1499	Nov-m1474-3p	-
1500	Nov-m1475-5p	MIR5270
1501	Nov-m1476-5p	-
1502	Nov-m1477-5p	-
1503	Nov-m1478-3p	MIR528
1504	Nov-m1479-3p	MIR1319
1505	Nov-m1480-3p	MIR951
1506	Nov-m1481-3p	-
1507	Nov-m1482-5p	MIR2934
1508	Nov-m1483-5p	-
1509	Nov-m1484-5p	-
1510	Nov-m1485-5p	-
1511	Nov-m1486-3p	MIR2632
1512	Nov-m1487-5p	-
1513	Nov-m1488-5p	MIR5070
1514	Nov-m1489-3p	MIR6158
1515	Nov-m1490-3p	-
1516	Nov-m1491-3p	-
1517	Nov-m1492-5p	-
1518	Nov-m1493-5p	MIR5267
1519	Nov-m1494-5p	MIR160
1520	Nov-m1495-3p	-
1521	Nov-m1496-3p	-
1522	Nov-m1497-3p	MIR390
1523	Nov-m1498-5p	MIR393
1524	Nov-m1499-5p	MIR918
1525	Nov-m1500-5p	MIR1031
1526	Nov-m1501-5p	-
1527	Nov-m1502-5p	-
1528	Nov-m1503-3p	MIR399
1529	Nov-m1504-3p	MIR951
1530	Nov-m1505-5p	-
1531	Nov-m1506-5p	-
1532	Nov-m1507-3p	-
1533	Nov-m1508-3p	MIR9666
1534	Nov-m1509-5p	MIR1882
1535	Nov-m1510-5p	-
1536	Nov-m1511-3p	MIR8032
1537	Nov-m1512-3p	MIR5270
1538	Nov-m1513-5p	-
1539	Nov-m1514-5p	-
1540	Nov-m1515-3p	-
1541	Nov-m1516-5p	-
1542	Nov-m1517-5p	MIR862
1543	Nov-m1518-3p	-
1544	Nov-m1519-5p	MIR835
1545	Nov-m1520-3p	MIR7729
1546	Nov-m1521-3p	MIR6152
1547	Nov-m1522-5p	MIR7993
1548	Nov-m1523-3p	-
1549	Nov-m1524-3p	MIR2934
1550	Nov-m1525-5p	-
1551	Nov-m1526-3p	-
1552	Nov-m1527-3p	-
1553	Nov-m1528-3p	MIR1878
1554	Nov-m1529-5p	-
1555	Nov-m1530-5p	MIR7996
1556	Nov-m1531-3p	MIR5595
1557	Nov-m1532-3p	-
1558	Nov-m1533-3p	MIR533
1559	Nov-m1534-5p	-
1560	Nov-m1535-3p	MIR821
1561	Nov-m1536-3p	-
1562	Nov-m1537-3p	MIR3932
1563	Nov-m1538-3p	-
1564	Nov-m1539-3p	MIR3522
1565	Nov-m1540-5p	-
1566	Nov-m1541-3p	MIR4349
1567	Nov-m1542-5p	MIR6288
1568	Nov-m1543-5p	MIR475
1569	Nov-m1544-5p	MIR4416
1570	Nov-m1545-5p	-
1571	Nov-m1546-3p	MIR5539
1572	Nov-m1547-5p	MIR1063
1573	Nov-m1548-5p	-
1574	Nov-m1549-5p	-
1575	Nov-m1550-5p	-
1576	Nov-m1551-5p	MIR5038
1577	Nov-m1552-5p	-
1578	Nov-m1553-3p	MIR9560
1579	Nov-m1554-3p	MIR164_2
1580	Nov-m1555-5p	-
1581	Nov-m1556-5p	-
1582	Nov-m1557-3p	MIR481
1583	Nov-m1558-5p	MIR950
1584	Nov-m1559-3p	-
1585	Nov-m1560-5p	MIR6288
1586	Nov-m1561-3p	MIR2676
1587	Nov-m1562-5p	-
1588	Nov-m1563-5p	-
1589	Nov-m1564-3p	-
1590	Nov-m1565-3p	-
1591	Nov-m1566-3p	-
1592	Nov-m1567-3p	MIR474
1593	Nov-m1568-5p	-
1594	Nov-m1569-5p	MIR5079
1595	Nov-m1570-5p	-
1596	Nov-m1571-5p	MIR2606
1597	Nov-m1572-5p	MIR1030
1598	Nov-m1573-3p	-
1599	Nov-m1574-3p	MIR1514
1600	Nov-m1575-3p	MIR1023
1601	Nov-m1576-3p	MIR1883
1602	Nov-m1577-3p	MIR7492
1603	Nov-m1578-3p	-
1604	Nov-m1579-3p	MIR6158
1605	Nov-m1580-3p	MIR6020
1606	Nov-m1581-5p	-
1607	Nov-m1582-5p	MIR6267
1608	Nov-m1583-5p	-
1609	Nov-m1584-3p	-
1610	Nov-m1585-3p	MIR7726
1611	Nov-m1586-3p	-
1612	Nov-m1587-3p	-
1613	Nov-m1588-5p	MIR393
1614	Nov-m1589-5p	MIR6158
1615	Nov-m1590-3p	-
1616	Nov-m1591-3p	MIR3932
1617	Nov-m1592-3p	MIR5038
1618	Nov-m1593-3p	-
1619	Nov-m1594-5p	-
1620	Nov-m1595-3p	-
1621	Nov-m1596-3p	MIR8670
1622	Nov-m1597-5p	-
1623	Nov-m1598-3p	MIR4380
1624	Nov-m1599-3p	-
1625	Nov-m1600-3p	-
1626	Nov-m1601-5p	-
1627	Nov-m1602-3p	MIR1446
1628	Nov-m1603-3p	MIR8024
1629	Nov-m1604-5p	MIR1219
1630	Nov-m1605-5p	-
1631	Nov-m1606-3p	MIR5267
1632	Nov-m1607-5p	-
1633	Nov-m1608-3p	-
1634	Nov-m1609-3p	MIR827_5
1635	Nov-m1610-5p	MIR7492
1636	Nov-m1611-5p	MIR7729
1637	Nov-m1612-3p	MIR156
1638	Nov-m1613-3p	MIR1882
1639	Nov-m1614-5p	-
1640	Nov-m1615-5p	-
1641	Nov-m1616-3p	MIR1219
1642	Nov-m1617-5p	MIR7757
1643	Nov-m1618-5p	-
1644	Nov-m1619-5p	-
1645	Nov-m1620-3p	MIR5037
1646	Nov-m1621-3p	MIR7807
1647	Nov-m1621-5p	MIR7996
1648	Nov-m1622-3p	-
1649	Nov-m1623-5p	MIR6158
1650	Nov-m1624-3p	-
1651	Nov-m1625-5p	-
1652	Nov-m1626-5p	MIR398_2
1653	Nov-m1627-3p	-
1654	Nov-m1628-3p	-
1655	Nov-m1629-5p	MIR7125
1656	Nov-m1630-5p	MIR3704
1657	Nov-m1631-3p	-
1658	Nov-m1632-3p	MIR853
1659	Nov-m1633-5p	MIR1435
1660	Nov-m1634-3p	MIR2934
1661	Nov-m1635-3p	-
1662	Nov-m1636-5p	MIR1887
1663	Nov-m1637-5p	MIR394
1664	Nov-m1638-5p	MIR1031
1665	Nov-m1639-5p	MIR5084
1666	Nov-m1640-3p	MIR1886
1667	Nov-m1641-5p	-
1668	Nov-m1642-5p	MIR9657
1669	Nov-m1643-3p	-
1670	Nov-m1644-5p	MIR5179
1671	Nov-m1645-5p	MIR482
1672	Nov-m1646-3p	MIR854
1673	Nov-m1647-5p	MIR1886
1674	Nov-m1648-5p	MIR529
1675	Nov-m1649-3p	-
1676	Nov-m1650-5p	MIR861
1677	Nov-m1651-3p	MIR9483
1678	Nov-m1652-5p	-
1679	Nov-m1653-3p	-
1680	Nov-m1654-5p	MIR398_2
1681	Nov-m1655-5p	MIR478
1682	Nov-m1656-3p	-
1683	Nov-m1657-3p	-
1684	Nov-m1658-5p	MIR5780
1685	Nov-m1659-5p	-
1686	Nov-m1660-5p	-
1687	Nov-m1661-5p	-
1688	Nov-m1662-3p	-
1689	Nov-m1663-3p	-
1690	Nov-m1664-5p	-
1691	Nov-m1665-5p	MIR2934
1692	Nov-m1666-3p	-
1693	Nov-m1667-3p	-
1694	Nov-m1668-3p	MIR2606
1695	Nov-m1669-3p	MIR947
1696	Nov-m1670-5p	MIR538
1697	Nov-m1671-3p	MIR7729
1698	Nov-m1672-5p	-
1699	Nov-m1673-3p	MIR2667
1700	Nov-m1674-3p	MIR4380
1701	Nov-m1675-3p	MIR856
1702	Nov-m1676-5p	-
1703	Nov-m1677-3p	-
1704	Nov-m1678-3p	MIR5998
1705	Nov-m1679-3p	-
1706	Nov-m1680-3p	MIR5559
1707	Nov-m1680-5p	-
1708	Nov-m1681-3p	MIR7729
1709	Nov-m1682-3p	MIR398
1710	Nov-m1683-5p	MIR4416
1711	Nov-m1684-5p	-
1712	Nov-m1685-3p	-
1713	Nov-m1686-5p	MIR2655
1714	Nov-m1687-5p	-
1715	Nov-m1688-3p	MIR902
1716	Nov-m1689-3p	MIR947
1717	Nov-m1690-5p	MIR5185
1718	Nov-m1691-5p	MIR4416
1719	Nov-m1692-5p	MIR3932
1720	Nov-m1693-5p	-
1721	Nov-m1694-5p	-
1722	Nov-m1695-3p	-
1723	Nov-m1696-3p	MIR535
1724	Nov-m1697-3p	MIR5067
1725	Nov-m1698-3p	MIR845_1
1726	Nov-m1699-3p	-
1727	Nov-m1700-5p	MIR5225
1728	Nov-m1701-3p	-
1729	Nov-m1702-3p	-
1730	Nov-m1703-5p	-
1731	Nov-m1704-3p	-
1732	Nov-m1705-5p	MIR5067
1733	Nov-m1706-5p	MIR2632
1734	Nov-m1707-5p	MIR821
1735	Nov-m1708-3p	-
1736	Nov-m1709-5p	-
1737	Nov-m1710-5p	MIR9776
1738	Nov-m1711-3p	-
1739	Nov-m1712-5p	MIR8657
1740	Nov-m1713-3p	-
1741	Nov-m1714-3p	MIR5289
1742	Nov-m1715-5p	MIR7996
1743	Nov-m1716-5p	MIR7729
1744	Nov-m1717-5p	-
1745	Nov-m1718-5p	MIR9483
1746	Nov-m1719-5p	MIR827_2
1747	Nov-m1720-3p	-
1748	Nov-m1721-3p	MIR810
1749	Nov-m1722-5p	-
1750	Nov-m1723-5p	-
1751	Nov-m1724-5p	MIR5303
1752	Nov-m1725-3p	MIR814
1753	Nov-m1726-3p	MIR7492
1754	Nov-m1727-3p	-
1755	Nov-m1728-3p	MIR5780
1756	Nov-m1729-5p	MIR171_2
1757	Nov-m1730-5p	MIR158
1758	Nov-m1731-5p	MIR1219
1759	Nov-m1732-3p	MIR5559
1760	Nov-m1733-3p	MIR7532
1761	Nov-m1734-3p	-
1762	Nov-m1735-5p	MIR533
1763	Nov-m1736-3p	MIR4371
1764	Nov-m1737-3p	-
1765	Nov-m1737-5p	MIR6266
1766	Nov-m1738-3p	-
1767	Nov-m1739-3p	MIR6135
1768	Nov-m1740-5p	MIR812
1769	Nov-m1741-5p	MIR5568
1770	Nov-m1742-5p	-
1771	Nov-m1743-5p	MIR4240
1772	Nov-m1744-3p	MIR476
1773	Nov-m1745-5p	MIR1144
1774	Nov-m1746-5p	MIR4208
1775	Nov-m1747-3p	-
1776	Nov-m1747-5p	-
1777	Nov-m1748-3p	-
1778	Nov-m1748-5p	-
1779	Nov-m1749-3p	-
1780	Nov-m1750-3p	MIR166
1781	Nov-m1751-5p	-
1782	Nov-m1752-3p	-
1783	Nov-m1753-5p	-
1784	Nov-m1754-3p	-
1785	Nov-m1755-3p	-
1786	Nov-m1756-5p	MIR5167
1787	Nov-m1757-5p	MIR166
1788	Nov-m1758-3p	MIR1882
1789	Nov-m1759-3p	MIR9772
1790	Nov-m1760-5p	MIR1512
1791	Nov-m1761-3p	-
1792	Nov-m1761-5p	MIR9560
1793	Nov-m1762-5p	MIR9776
1794	Nov-m1763-5p	MIR5272
1795	Nov-m1764-5p	MIR810
1796	Nov-m1765-3p	-
1797	Nov-m1766-3p	MIR8663
1798	Nov-m1767-3p	MIR5304
1799	Nov-m1768-3p	MIR5048
1800	Nov-m1769-5p	-
1801	Nov-m1770-5p	MIR394
1802	Nov-m1771-3p	MIR173
1803	Nov-m1772-5p	MIR166
1804	Nov-m1773-5p	-
1805	Nov-m1774-5p	-
1806	Nov-m1775-5p	MIR5062
1807	Nov-m1776-3p	-
1808	Nov-m1777-3p	-
1809	Nov-m1778-5p	-
1810	Nov-m1779-5p	MIR861
1811	Nov-m1780-5p	MIR4227
1812	Nov-m1781-5p	-
1813	Nov-m1782-3p	MIR857
1814	Nov-m1783-5p	MIR5534
1815	Nov-m1784-3p	MIR8757
1816	Nov-m1784-5p	-
1817	Nov-m1785-5p	MIR6145
1818	Nov-m1786-5p	MIR393
1819	Nov-m1787-5p	MIR2606
1820	Nov-m1788-5p	MIR319
1821	Nov-m1789-3p	-
1822	Nov-m1789-5p	-
1823	Nov-m1790-3p	-
1824	Nov-m1791-3p	MIR1888
1825	Nov-m1792-5p	MIR3627
1826	Nov-m1793-5p	-
1827	Nov-m1794-3p	MIR862
1828	Nov-m1795-5p	-
1829	Nov-m1796-5p	-
1830	Nov-m1797-3p	-
1831	Nov-m1798-5p	MIR5241
1832	Nov-m1799-3p	MIR533
1833	Nov-m1800-5p	MIR952
1834	Nov-m1801-5p	-
1835	Nov-m1802-3p	-
1836	Nov-m1803-3p	-
1837	Nov-m1804-3p	-
1838	Nov-m1805-5p	-
1839	Nov-m1806-3p	MIR6020
1840	Nov-m1807-5p	MIR824
1841	Nov-m1808-3p	MIR824
1842	Nov-m1809-3p	-
1843	Nov-m1810-5p	-
1844	Nov-m1811-5p	MIR2646
1845	Nov-m1812-5p	MIR861
1846	Nov-m1813-3p	MIR859
1847	Nov-m1814-5p	MIR533
1848	Nov-m1815-3p	MIR4227
1849	Nov-m1816-5p	-
1850	Nov-m1817-5p	-
1851	Nov-m1818-5p	MIR414
1852	Nov-m1819-3p	MIR529
1853	Nov-m1820-5p	-
1854	Nov-m1821-3p	-
1855	Nov-m1822-3p	MIR398
1856	Nov-m1823-5p	-
1857	Nov-m1824-5p	MIR5048
1858	Nov-m1825-5p	MIR482
1859	Nov-m1826-5p	-
1860	Nov-m1827-5p	-
1861	Nov-m1828-5p	MIR4347
1862	Nov-m1829-5p	MIR9483
1863	Nov-m1830-5p	MIR7768
1864	Nov-m1831-3p	-
1865	Nov-m1831-5p	MIR159
1866	Nov-m1832-3p	MIR2670
1867	Nov-m1833-3p	MIR8703
1868	Nov-m1834-5p	MIR8767
1869	Nov-m1835-3p	MIR5285
1870	Nov-m1835-5p	MIR835
1871	Nov-m1836-5p	MIR393
1872	Nov-m1837-5p	-
1873	Nov-m1838-3p	MIR6266
1874	Nov-m1839-3p	MIR8710
1875	Nov-m1840-5p	-
1876	Nov-m1841-5p	-
1877	Nov-m1842-3p	MIR5272
1878	Nov-m1843-5p	MIR952
1879	Nov-m1844-3p	-
1880	Nov-m1845-5p	MIR403
1881	Nov-m1846-3p	MIR6024
1882	Nov-m1847-3p	-
1883	Nov-m1848-3p	-
1884	Nov-m1849-3p	MIR831
1885	Nov-m1850-3p	-
1886	Nov-m1851-3p	MIR4208
1887	Nov-m1852-5p	MIR1031
1888	Nov-m1853-5p	-
1889	Nov-m1854-3p	MIR2606
1890	Nov-m1855-3p	MIR902
1891	Nov-m1856-5p	MIR6145
1892	Nov-m1857-3p	MIR1063
1893	Nov-m1857-5p	-
1894	Nov-m1858-3p	MIR399
1895	Nov-m1859-5p	MIR6137
1896	Nov-m1860-5p	MIR475
1897	Nov-m1861-3p	-
1898	Nov-m1862-5p	MIR2646
1899	Nov-m1863-3p	MIR902
1900	Nov-m1864-3p	MIR1510
1901	Nov-m1865-5p	-
1902	Nov-m1866-5p	-
1903	Nov-m1867-3p	-
1904	Nov-m1868-3p	-
1905	Nov-m1869-5p	MIR4227
1906	Nov-m1870-5p	MIR2118
1907	Nov-m1871-5p	-
1908	Nov-m1872-5p	MIR9677
1909	Nov-m1873-3p	MIR172
1910	Nov-m1874-5p	-
1911	Nov-m1875-5p	-
1912	Nov-m1876-5p	-
1913	Nov-m1877-5p	MIR1023
1914	Nov-m1878-5p	-
1915	Nov-m1879-3p	MIR8657
1916	Nov-m1880-3p	-
1917	Nov-m1881-3p	MIR1513
1918	Nov-m1882-3p	MIR1919
1919	Nov-m1883-3p	MIR403
1920	Nov-m1884-3p	-
1921	Nov-m1885-3p	-
1922	Nov-m1886-3p	MIR8565
1923	Nov-m1887-5p	MIR7725
1924	Nov-m1888-3p	-
1925	Nov-m1889-3p	MIR8743
1926	Nov-m1890-5p	MIR403
1927	Nov-m1891-3p	-
1928	Nov-m1892-5p	MIR5084
1929	Nov-m1893-3p	MIR6025
1930	Nov-m1894-5p	MIR2629
1931	Nov-m1895-3p	MIR949
1932	Nov-m1896-3p	-
1933	Nov-m1897-3p	-
1934	Nov-m1898-3p	-
1935	Nov-m1899-3p	-
1936	Nov-m1900-3p	MIR7729
1937	Nov-m1901-3p	MIR858
1938	Nov-m1902-3p	MIR6151
1939	Nov-m1903-3p	-
1940	Nov-m1904-5p	MIR158
1941	Nov-m1905-3p	-
1942	Nov-m1906-5p	-
1943	Nov-m1907-5p	MIR408
1944	Nov-m1908-5p	-
1945	Nov-m1909-3p	-
1946	Nov-m1910-5p	-
1947	Nov-m1911-3p	-
1948	Nov-m1912-3p	-
1949	Nov-m1913-5p	MIR5272
1950	Nov-m1914-5p	MIR2676
1951	Nov-m1915-5p	MIR2646
1952	Nov-m1916-3p	-
1953	Nov-m1917-5p	MIR951
1954	Nov-m1918-3p	MIR5285
1955	Nov-m1919-5p	MIR397
1956	Nov-m1920-3p	-
1957	Nov-m1921-3p	MIR827_2
1958	Nov-m1922-3p	-
1959	Nov-m1923-3p	-
1960	Nov-m1924-3p	MIR3440
1961	Nov-m1925-5p	MIR7506
1962	Nov-m1926-3p	MIR1878
1963	Nov-m1927-5p	MIR535
1964	Nov-m1928-5p	-
1965	Nov-m1929-3p	MIR1446
1966	Nov-m1930-3p	-
1967	Nov-m1931-5p	MIR7725
1968	Nov-m1932-5p	-
1969	Nov-m1933-5p	MIR7492
1970	Nov-m1934-3p	MIR1027
1971	Nov-m1935-3p	MIR1428
1972	Nov-m1936-5p	-
1973	Nov-m1937-3p	MIR918
1974	Nov-m1938-3p	MIR5062
1975	Nov-m1939-5p	MIR528
1976	Nov-m1940-5p	MIR5079
1977	Nov-m1941-3p	MIR818
1978	Nov-m1942-5p	MIR5079
1979	Nov-m1943-5p	MIR6025
1980	Nov-m1944-5p	MIR3932
1981	Nov-m1945-5p	-
1982	Nov-m1946-3p	MIR8007
1983	Nov-m1947-3p	-
1984	Nov-m1948-3p	-
1985	Nov-m1949-5p	MIR2632
1986	Nov-m1950-3p	-
1987	Nov-m1951-3p	MIR6152
1988	Nov-m1951-5p	-
1989	Nov-m1952-3p	-
1990	Nov-m1953-3p	MIR2647
1991	Nov-m1954-5p	-
1992	Nov-m1955-5p	MIR7696
1993	Nov-m1956-3p	MIR8032
1994	Nov-m1957-5p	MIR2632
1995	Nov-m1958-3p	MIR1313
1996	Nov-m1959-3p	MIR7532
1997	Nov-m1960-3p	MIR393
1998	Nov-m1961-3p	-
1999	Nov-m1962-3p	-
[truncated: 679 more rows]
