# Supplementary material for: Analyzing the defense response mechanism of Atractylodes macrocephala to Fusarium oxysporum through small RNA and degradome sequencing
Source: Front Plant Sci. 2024 Jul 22;15:1415209. doi: 10.3389/fpls.2024.1415209 (PMC11298489; doi:10.3389/fpls.2024.1415209)
Supplement: Supplementary file 7 [file Table_4.xlsx]

## Sheet: known miRNA
Table S4 known and novel miRNA in each sample
Fo-6d	Fo-12d	CG
aly-miR156g-5p	aly-miR156g-5p	ahy-miR156a
aly-miR166g-5p	aly-miR166g-5p	aly-miR156g-5p
aly-miR172e-3p	aly-miR172e-3p	aly-miR166g-5p
ama-miR156	ama-miR156	aly-miR172e-3p
aof-miR393a	aof-miR168b	ama-miR156
aqc-miR156a	aof-miR393a	aof-miR168b
aqc-miR477e	aof-miR395a	aof-miR393a
ata-miR172c-5p	aqc-miR156a	aof-miR395a
ata-miR393-5p	aqc-miR477e	aqc-miR156a
ath-miR156c-5p	ata-miR393-5p	aqc-miR477e
ath-miR157b-5p	ath-miR156c-5p	ata-miR393-5p
ath-miR157c-3p	ath-miR157b-5p	ath-miR156c-5p
ath-miR160a-5p	ath-miR157c-3p	ath-miR157b-5p
ath-miR164b-5p	ath-miR160a-5p	ath-miR157c-3p
ath-miR164c-5p	ath-miR164b-5p	ath-miR160a-5p
ath-miR167d	ath-miR164c-5p	ath-miR164b-5p
ath-miR168a-5p	ath-miR167d	ath-miR164c-5p
ath-miR169a-5p	ath-miR168a-5p	ath-miR167d
ath-miR169f-5p	ath-miR172a	ath-miR168a-5p
ath-miR169h	ath-miR390b-5p	ath-miR171a-5p
ath-miR172a	ath-miR393a-5p	ath-miR172a
ath-miR393a-5p	ath-miR394a	ath-miR390b-5p
ath-miR394a	ath-miR395d	ath-miR393a-5p
bdi-miR169m	ath-miR858b	ath-miR394a
bdi-miR845	atr-miR390.1	ath-miR395d
bgy-miR156	atr-miR8577	ath-miR858b
bna-miR156a	bdi-miR169m	atr-miR390.1
bna-miR167d	bdi-miR845	atr-miR8577
bna-miR169g	bgy-miR156	bdi-miR169m
bna-miR397a	bna-miR156a	bdi-miR845
bra-miR164e-5p	bna-miR167d	bgy-miR156
bra-miR168b-5p	bna-miR397a	bna-miR156a
cas-miR156g	bra-miR164e-5p	bna-miR167d
cas-miR157d	bra-miR168b-5p	bna-miR397a
cas-miR394	cas-miR11592	bra-miR164e-5p
cca-miR156b	cas-miR156g	bra-miR168b-5p
cca-miR164	cas-miR157d	cas-miR156g
cca-miR6111-5p	cas-miR319b	cas-miR157d
cca-miR6114-5p	cas-miR394	cas-miR319b
cca-miR6117	cca-miR156b	cas-miR394
cme-miR156j	cca-miR164	cca-miR156b
cme-miR168	cca-miR6111-5p	cca-miR164
csi-miR156d-5p	cca-miR6114-5p	cca-miR6111-5p
csi-miR156e-5p	cme-miR156j	cca-miR6114-5p
csi-miR159b-5p	cme-miR168	cca-miR6117
csi-miR160a-5p	csi-miR156d-5p	cme-miR156j
csi-miR166b-5p	csi-miR156e-5p	cme-miR168
csi-miR393a	csi-miR159b-5p	csi-miR156d-5p
csi-miR393b-5p	csi-miR160a-5p	csi-miR156e-5p
csi-miR396e-5p	csi-miR166b-5p	csi-miR159a-5p
csi-miR399b-5p	csi-miR393a	csi-miR159b-5p
csi-miR477d-5p	csi-miR393b-5p	csi-miR160a-5p
ctr-miR167	csi-miR396e-5p	csi-miR166b-5p
eun-miR397a-5p	csi-miR399b-5p	csi-miR393a
fve-miR159a-5p	csi-miR477b-5p	csi-miR393b-5p
fve-miR167d	csi-miR477d-5p	csi-miR396e-5p
fve-miR477a	ctr-miR167	csi-miR477b-5p
gma-miR156e	eun-miR397a-5p	csi-miR477d-5p
gma-miR156g	fve-miR159a-5p	ctr-miR167
gma-miR156k	fve-miR167d	eun-miR397a-5p
gma-miR156q	fve-miR477a	far-miR156b
gma-miR159a-5p	gma-miR156e	fve-miR159a-5p
gma-miR159e-5p	gma-miR156g	fve-miR167d
gma-miR160c	gma-miR156k	fve-miR477a
gma-miR164b	gma-miR156q	ghr-miR156c
gma-miR168b	gma-miR159a-5p	gma-miR156e
gma-miR169e	gma-miR159e-5p	gma-miR156f
gma-miR169v	gma-miR160c	gma-miR156g
gma-miR396e	gma-miR164b	gma-miR156k
gma-miR396h	gma-miR168b	gma-miR156q
gra-miR166d	gma-miR169e	gma-miR159a-5p
gra-miR167c	gma-miR171l	gma-miR159e-5p
hbr-miR156	gma-miR390e	gma-miR160c
hbr-miR396a	gma-miR396e	gma-miR164b
hci-miR156a	gma-miR396h	gma-miR168b
lja-miR164-5p	gra-miR166d	gma-miR169e
lja-miR168-5p	gra-miR167c	gma-miR171l
lus-miR167a	hbr-miR156	gma-miR390e
lus-miR397a	hbr-miR396a	gma-miR396e
mdm-miR167h	lja-miR164-5p	gma-miR396h
mdm-miR396f	lja-miR168-5p	gra-miR166d
mes-miR160c	lus-miR167a	gra-miR167c
mes-miR160g	lus-miR397a	hbr-miR156
mes-miR160h	mdm-miR156ae	hbr-miR396a
mes-miR169f	mdm-miR167h	hci-miR156a
mes-miR477b	mdm-miR396f	lja-miR164-5p
mes-miR477d	mes-miR160c	lja-miR168-5p
mtr-miR156g-5p	mes-miR160g	lja-miR397
mtr-miR166e-5p	mes-miR160h	lus-miR167a
mtr-miR172d-5p	mes-miR169f	lus-miR397a
nta-miR169t	mes-miR477b	mdm-miR156ae
nta-miR397	mes-miR477d	mdm-miR167h
nta-miR477a	mes-miR477i	mdm-miR396f
osa-miR156l-5p	mtr-miR166e-5p	mdm-miR397a
osa-miR164d	mtr-miR319a-5p	mes-miR160c
osa-miR167a-5p	nta-miR397	mes-miR160g
osa-miR167d-5p	nta-miR477a	mes-miR160h
osa-miR169g	osa-miR156l-5p	mes-miR169f
osa-miR393a	osa-miR164d	mes-miR397
osa-miR396c-5p	osa-miR166b-5p	mes-miR477b
osa-miR397a	osa-miR167a-5p	mes-miR477d
pab-miR156e	osa-miR167d-5p	mtr-miR166e-5p
pab-miR160c	osa-miR393a	mtr-miR319a-5p
pab-miR166c	osa-miR396c-5p	mtr-miR5225c
pab-miR396b	osa-miR397a	nta-miR397
pab-miR399e	pab-miR160c	nta-miR477a
pab-miR4414	pab-miR396b	osa-miR156l-5p
ppe-miR393a	pab-miR4414	osa-miR164d
ppe-miR396a	peu-miR2916	osa-miR167a-5p
ppt-miR160b	ppe-miR393a	osa-miR167d-5p
pta-miR156a	ppe-miR396a	osa-miR393a
pta-miR156b	ppt-miR160b	osa-miR396c-5p
ptc-miR167f-5p	ppt-miR408a	osa-miR397a
ptc-miR169w	pta-miR156a	osa-miR397b
ptc-miR172b-5p	pta-miR156b	pab-miR156e
sbi-miR169d-5p	ptc-miR167f-5p	pab-miR160c
sbi-miR396b	sbi-miR396b	pab-miR166c
sly-miR156e-5p	sly-miR166c-5p	pab-miR396b
sly-miR169e-5p	sly-miR395a	pab-miR4414
sly-miR397-5p	sly-miR397-5p	peu-miR2916
smo-miR396	sly-miR403-5p	ppe-miR393a
stu-miR156f-5p	smo-miR396	ppe-miR396a
stu-miR172c-3p	stu-miR156f-5p	ppt-miR160b
stu-miR397-5p	stu-miR172c-3p	pta-miR156a
vca-miR396-5p	stu-miR397-5p	pta-miR156b
vvi-miR394c	stu-miR477a-5p	ptc-miR167f-5p
vvi-miR396a	tae-miR395b	ptc-miR397b
zma-miR166c-5p	vca-miR396-5p	ptc-miR530a
zma-miR172a	vvi-miR394c	sbi-miR156d
zma-miR393a-5p	vvi-miR396a	sbi-miR396b
zma-miR396h	zma-miR166c-5p	sly-miR156e-5p
	zma-miR172a	sly-miR319c-5p
	zma-miR393a-5p	sly-miR395a
	zma-miR396h	sly-miR397-5p
		sly-miR403-5p
		smo-miR156d
		smo-miR396
		stu-miR156f-5p
		stu-miR172c-3p
		stu-miR397-5p
		stu-miR477a-5p
		tae-miR395b
		vca-miR396-5p
		vvi-miR394c
		vvi-miR396a
		zma-miR166c-5p
		zma-miR172a
		zma-miR393a-5p
		zma-miR396h

## Sheet: novel miRNA
Fo-6d	Fo-12d	CG
Nov-m0051-5p	Nov-m0025-3p	Nov-m0025-3p
Nov-m0055-5p	Nov-m0044-5p	Nov-m0044-5p
Nov-m0067-3p	Nov-m0055-5p	Nov-m0059-3p
Nov-m0068-3p	Nov-m0067-3p	Nov-m0067-3p
Nov-m0121-5p	Nov-m0068-3p	Nov-m0070-5p
Nov-m0143-3p	Nov-m0070-5p	Nov-m0075-3p
Nov-m0169-3p	Nov-m0075-3p	Nov-m0085-5p
Nov-m0172-3p	Nov-m0085-5p	Nov-m0096-5p
Nov-m0220-3p	Nov-m0099-5p	Nov-m0169-3p
Nov-m0266-3p	Nov-m0121-5p	Nov-m0189-3p
Nov-m0292-3p	Nov-m0143-3p	Nov-m0204-3p
Nov-m0306-3p	Nov-m0143-5p	Nov-m0292-3p
Nov-m0310-5p	Nov-m0169-3p	Nov-m0363-5p
Nov-m0311-5p	Nov-m0176-5p	Nov-m0407-5p
Nov-m0445-5p	Nov-m0204-3p	Nov-m0418-5p
Nov-m0454-5p	Nov-m0266-3p	Nov-m0441-5p
Nov-m0488-3p	Nov-m0292-3p	Nov-m0445-5p
Nov-m0492-3p	Nov-m0306-3p	Nov-m0458-5p
Nov-m0542-5p	Nov-m0363-5p	Nov-m0486-3p
Nov-m0611-3p	Nov-m0445-5p	Nov-m0492-3p
Nov-m0639-3p	Nov-m0458-5p	Nov-m0506-5p
Nov-m0663-5p	Nov-m0492-3p	Nov-m0529-5p
Nov-m0721-5p	Nov-m0506-5p	Nov-m0539-3p
Nov-m0746-5p	Nov-m0529-5p	Nov-m0552-5p
Nov-m0756-5p	Nov-m0539-3p	Nov-m0606-5p
Nov-m0757-3p	Nov-m0584-3p	Nov-m0652-3p
Nov-m0790-5p	Nov-m0611-3p	Nov-m0671-5p
Nov-m0818-5p	Nov-m0652-3p	Nov-m0701-5p
Nov-m0821-3p	Nov-m0658-5p	Nov-m0790-5p
Nov-m0836-5p	Nov-m0681-5p	Nov-m0805-5p
Nov-m0892-3p	Nov-m0721-5p	Nov-m0833-3p
Nov-m0893-5p	Nov-m0739-5p	Nov-m0844-5p
Nov-m0909-3p	Nov-m0753-5p	Nov-m0892-3p
Nov-m0929-5p	Nov-m0755-3p	Nov-m0893-5p
Nov-m0987-5p	Nov-m0802-3p	Nov-m0906-5p
Nov-m0989-3p	Nov-m0805-5p	Nov-m0919-3p
Nov-m1033-5p	Nov-m0806-5p	Nov-m0929-5p
Nov-m1037-5p	Nov-m0833-3p	Nov-m0944-3p
Nov-m1060-3p	Nov-m0836-5p	Nov-m0987-5p
Nov-m1075-3p	Nov-m0844-5p	Nov-m1074-3p
Nov-m1076-3p	Nov-m0847-5p	Nov-m1089-3p
Nov-m1099-3p	Nov-m0892-3p	Nov-m1144-3p
Nov-m1117-5p	Nov-m0893-5p	Nov-m1144-5p
Nov-m1144-3p	Nov-m0906-5p	Nov-m1169-3p
Nov-m1144-5p	Nov-m0919-3p	Nov-m1201-5p
Nov-m1149-5p	Nov-m0929-5p	Nov-m1247-3p
Nov-m1207-5p	Nov-m0969-3p	Nov-m1274-5p
Nov-m1247-3p	Nov-m0978-5p	Nov-m1330-3p
Nov-m1260-3p	Nov-m0983-5p	Nov-m1330-5p
Nov-m1285-3p	Nov-m0987-5p	Nov-m1336-5p
Nov-m1303-3p	Nov-m1027-5p	Nov-m1347-3p
Nov-m1330-3p	Nov-m1075-3p	Nov-m1362-3p
Nov-m1330-5p	Nov-m1096-3p	Nov-m1367-3p
Nov-m1347-3p	Nov-m1117-5p	Nov-m1376-5p
Nov-m1362-3p	Nov-m1141-3p	Nov-m1385-3p
Nov-m1376-5p	Nov-m1144-3p	Nov-m1440-5p
Nov-m1383-3p	Nov-m1144-5p	Nov-m1472-5p
Nov-m1385-3p	Nov-m1156-3p	Nov-m1532-3p
Nov-m1392-3p	Nov-m1161-3p	Nov-m1543-5p
Nov-m1435-3p	Nov-m1169-3p	Nov-m1557-3p
Nov-m1456-5p	Nov-m1182-3p	Nov-m1579-3p
Nov-m1482-5p	Nov-m1201-5p	Nov-m1624-3p
Nov-m1487-5p	Nov-m1247-3p	Nov-m1642-5p
Nov-m1532-3p	Nov-m1259-3p	Nov-m1698-3p
Nov-m1724-5p	Nov-m1280-5p	Nov-m1724-5p
Nov-m1738-3p	Nov-m1303-3p	Nov-m1738-3p
Nov-m1759-3p	Nov-m1309-5p	Nov-m1781-5p
Nov-m1768-3p	Nov-m1330-3p	Nov-m1784-3p
Nov-m1781-5p	Nov-m1330-5p	Nov-m1784-5p
Nov-m1813-3p	Nov-m1347-3p	Nov-m1786-5p
Nov-m1864-3p	Nov-m1362-3p	Nov-m1794-3p
Nov-m1910-5p	Nov-m1367-3p	Nov-m1868-3p
Nov-m1917-5p	Nov-m1376-5p	Nov-m1881-3p
Nov-m1951-5p	Nov-m1385-3p	Nov-m1884-3p
Nov-m1960-3p	Nov-m1427-5p	Nov-m1940-5p
Nov-m1987-5p	Nov-m1456-5p	Nov-m1978-3p
Nov-m1992-3p	Nov-m1482-5p	Nov-m1982-5p
Nov-m2001-3p	Nov-m1521-3p	Nov-m1983-5p
Nov-m2005-3p	Nov-m1528-3p	Nov-m1987-5p
Nov-m2047-3p	Nov-m1533-3p	Nov-m2047-3p
Nov-m2073-5p	Nov-m1535-3p	Nov-m2079-3p
Nov-m2123-3p	Nov-m1539-3p	Nov-m2122-5p
Nov-m2132-5p	Nov-m1543-5p	Nov-m2123-3p
Nov-m2137-5p	Nov-m1557-3p	Nov-m2187-5p
Nov-m2148-5p	Nov-m1568-5p	Nov-m2210-3p
Nov-m2186-5p	Nov-m1624-3p	Nov-m2295-5p
Nov-m2322-5p	Nov-m1698-3p	Nov-m2368-3p
Nov-m2430-3p	Nov-m1702-3p	Nov-m2398-5p
Nov-m2454-3p	Nov-m1724-5p	Nov-m2440-5p
Nov-m2490-3p	Nov-m1738-3p	Nov-m2454-3p
Nov-m2512-5p	Nov-m1766-3p	Nov-m2471-5p
Nov-m2514-3p	Nov-m1781-5p	Nov-m2514-3p
Nov-m2561-3p	Nov-m1794-3p
Nov-m2583-3p	Nov-m1834-5p
	Nov-m1852-5p
	Nov-m1864-3p
	Nov-m1868-3p
	Nov-m1895-3p
	Nov-m1917-5p
	Nov-m1926-3p
	Nov-m1931-5p
	Nov-m1940-5p
	Nov-m1982-5p
	Nov-m1983-5p
	Nov-m1987-5p
	Nov-m2001-3p
	Nov-m2021-5p
	Nov-m2047-3p
	Nov-m2091-3p
	Nov-m2122-5p
	Nov-m2123-3p
	Nov-m2186-5p
	Nov-m2187-5p
	Nov-m2210-3p
	Nov-m2231-3p
	Nov-m2233-3p
	Nov-m2271-5p
	Nov-m2324-5p
	Nov-m2367-5p
	Nov-m2368-3p
	Nov-m2430-3p
	Nov-m2445-5p
	Nov-m2454-3p
	Nov-m2472-5p
	Nov-m2514-3p
	Nov-m2517-5p
	Nov-m2561-3p
