# Supplementary material for: Analyzing the defense response mechanism of Atractylodes macrocephala to Fusarium oxysporum through small RNA and degradome sequencing
Source: Front Plant Sci. 2024 Jul 22;15:1415209. doi: 10.3389/fpls.2024.1415209 (PMC11298489; doi:10.3389/fpls.2024.1415209)
Supplement: Supplementary file 8 [file Table_5.xlsx]

## Sheet: Fo-6d vs CG
Table S5 Identification of Differentially Expressed miRNAs
miRNA_id	expression_Fo-6d	expression_ca	log2FC(Fo-6d/ca)	pval	padj	regulate	significant	tpm_Fo-6d-1	tpm_Fo-6d-2	tpm_Fo-6d-3	tpm_ca-1	tpm_ca-2	tpm_ca-3
fve-miR477a	1353.26	30193.6	-4.47972	7.44331e-28	5.69413e-26	down	yes	1982.28	864.25	1213.24	38468	27066.7	25046
mes-miR477d	1353.26	30193.6	-4.47972	7.44331e-28	5.69413e-26	down	yes	1982.28	864.25	1213.24	38468	27066.7	25046
csi-miR477d-5p	1540	28518.9	-4.21091	2.18867e-26	6.69733e-25	down	yes	2063.19	1049.45	1507.35	36622.2	24457.8	24476.8
mes-miR477b	1540	28518.9	-4.21091	2.18867e-26	6.69733e-25	down	yes	2063.19	1049.45	1507.35	36622.2	24457.8	24476.8
nta-miR477a	1540	28518.9	-4.21091	2.18867e-26	6.69733e-25	down	yes	2063.19	1049.45	1507.35	36622.2	24457.8	24476.8
aqc-miR477e	1267.47	27241.3	-4.42576	1.17264e-25	2.99023e-24	down	yes	1982.28	864.25	955.88	34818.4	23479.5	23425.9
csi-miR399b-5p	2724.46	0	18.0556	1.12977e-08	2.46935e-07	up	yes	1011.37	2345.82	4816.18	0	0	0
gma-miR171l	99.2667	2077.53	-4.38728	6.25752e-08	1.19675e-06	down	yes	40.45	0	257.35	2516.99	2445.79	1269.81
vvi-miR396a	298423	66373.4	2.16868	4.39549e-07	7.47234e-06	up	yes	363202	323353	208713	63134.5	69867.9	66117.9
eun-miR397a-5p	844.36	5114.19	-2.59856	8.20971e-06	0.000107711	down	yes	1173.19	771.65	588.24	8767.51	5217.67	1357.39
osa-miR397a	844.36	5114.19	-2.59856	8.20971e-06	0.000107711	down	yes	1173.19	771.65	588.24	8767.51	5217.67	1357.39
sly-miR397-5p	758.573	5114.19	-2.75313	8.44793e-06	0.000107711	down	yes	1173.19	771.65	330.88	8767.51	5217.67	1357.39
pab-miR399e	1023.56	0	16.6433	1.48121e-05	0.000174328	up	yes	364.09	1419.84	1286.76	0	0	0
mdm-miR167h	6958.61	1500.24	2.2136	2.51975e-05	0.000236754	up	yes	7969.58	7685.66	5220.59	1174.6	1793.58	1532.53
ptc-miR167f-5p	6958.61	1500.24	2.2136	2.51975e-05	0.000236754	up	yes	7969.58	7685.66	5220.59	1174.6	1793.58	1532.53
gra-miR167c	6948.32	1500.24	2.21147	2.55374e-05	0.000236754	up	yes	7969.58	7654.79	5220.59	1174.6	1793.58	1532.53
fve-miR167d	6904.67	1500.24	2.20237	2.78535e-05	0.000236754	up	yes	7807.76	7685.66	5220.59	1174.6	1793.58	1532.53
lus-miR167a	6904.67	1500.24	2.20237	2.78535e-05	0.000236754	up	yes	7807.76	7685.66	5220.59	1174.6	1793.58	1532.53
ath-miR394a	620.953	4151.84	-2.74118	6.5782e-05	0.000479269	down	yes	647.28	1142.05	73.53	6292.47	3097.99	3065.07
cas-miR394	620.953	4151.84	-2.74118	6.5782e-05	0.000479269	down	yes	647.28	1142.05	73.53	6292.47	3097.99	3065.07
vvi-miR394c	620.953	4151.84	-2.74118	6.5782e-05	0.000479269	down	yes	647.28	1142.05	73.53	6292.47	3097.99	3065.07
vca-miR396-5p	319874	95214.8	1.74824	7.24814e-05	0.000495982	up	yes	376431	349219	233971	95100.3	101745	88799.4
osa-miR396c-5p	320018	95577.8	1.7434	7.45594e-05	0.000495982	up	yes	376431	349651	233971	95226.1	101745	89762.7
ctr-miR167	8269.08	2114.5	1.96741	0.000107486	0.000629825	up	yes	9385.49	8951.17	6470.59	1845.79	2527.31	1970.4
gma-miR396h	299543	89654.3	1.74032	0.000109664	0.000629825	up	yes	363931	325360	209338	91534.5	94978	82450.3
gma-miR396e	299180	89612.6	1.73924	0.000110329	0.000629825	up	yes	363850	324866	208824	91115	95141	82581.7
sbi-miR396b	299543	89752.4	1.73874	0.000111146	0.000629825	up	yes	363931	325360	209338	91534.5	95141	82581.7
aof-miR395a	41.1533	931.033	-4.49942	0.000133119	0.000657004	down	yes	0	123.46	0	587.3	1549	656.8
ath-miR395d	41.1533	931.033	-4.49942	0.000133119	0.000657004	down	yes	0	123.46	0	587.3	1549	656.8
sly-miR395a	41.1533	931.033	-4.49942	0.000133119	0.000657004	down	yes	0	123.46	0	587.3	1549	656.8
tae-miR395b	41.1533	931.033	-4.49942	0.000133119	0.000657004	down	yes	0	123.46	0	587.3	1549	656.8
ath-miR168a-5p	4164	11595.6	-1.47753	0.000150396	0.000657446	down	yes	4247.74	5339.84	2904.41	11032.8	10924.5	12829.5
cme-miR168	4164	11595.6	-1.47753	0.000150396	0.000657446	down	yes	4247.74	5339.84	2904.41	11032.8	10924.5	12829.5
gma-miR168b	4164	11595.6	-1.47753	0.000150396	0.000657446	down	yes	4247.74	5339.84	2904.41	11032.8	10924.5	12829.5
lja-miR168-5p	4164	11595.6	-1.47753	0.000150396	0.000657446	down	yes	4247.74	5339.84	2904.41	11032.8	10924.5	12829.5
zma-miR166c-5p	8493.71	29455.7	-1.79408	0.000181435	0.000771097	down	yes	3762.29	14476.2	7242.65	28358.1	30409.3	29599.8
osa-miR167d-5p	8434.75	2508.56	1.74948	0.000532315	0.00218404	up	yes	9385.49	9043.77	6875	2433.09	2771.89	2320.69
ath-miR167d	8421.27	2508.56	1.74718	0.000542441	0.00218404	up	yes	9345.04	9043.77	6875	2433.09	2771.89	2320.69
atr-miR390.1	20.5767	577.393	-4.8098	0.000981688	0.00385124	down	yes	0	61.73	0	335.6	652.21	744.37
ath-miR390b-5p	20.5767	549.427	-4.73817	0.0014837	0.00553674	down	yes	0	61.73	0	251.7	652.21	744.37
gma-miR390e	20.5767	549.427	-4.73817	0.0014837	0.00553674	down	yes	0	61.73	0	251.7	652.21	744.37
fve-miR159a-5p	2682.42	5722.94	-1.09322	0.00166937	0.00608129	down	yes	2305.92	2469.29	3272.06	5369.58	5625.31	6173.92
aof-miR393a	2649.24	659.1	2.00699	0.00267854	0.00931401	up	yes	2548.65	1759.37	3639.71	461.45	815.26	700.59
ppe-miR393a	2649.24	659.1	2.00699	0.00267854	0.00931401	up	yes	2548.65	1759.37	3639.71	461.45	815.26	700.59
bna-miR167d	8434.75	2857.35	1.56166	0.00350919	0.0119313	up	yes	9385.49	9043.77	6875	3397.94	2853.42	2320.69
csi-miR396e-5p	153288	317079	-1.0486	0.0080932	0.026346	down	yes	155710	223748	80404.4	335934	319175	296129
mdm-miR396f	153288	317079	-1.0486	0.0080932	0.026346	down	yes	155710	223748	80404.4	335934	319175	296129
pab-miR396b	132164	52470	1.33277	0.0108364	0.034541	up	yes	143129	184394	68970.6	53486	46388.4	57535.7
osa-miR167a-5p	7498.93	2682.2	1.48326	0.0111675	0.0348701	up	yes	8333.67	8611.64	5551.47	3397.94	2853.42	1795.25
aly-miR166g-5p	3759.55	7603.63	-1.01613	0.0127388	0.0389808	down	yes	1739.55	3950.86	5588.24	6334.42	9864.67	6611.79
gma-miR159a-5p	247.037	826.467	-1.74219	0.0158621	0.0466711	down	yes	242.73	277.79	220.59	1132.65	733.74	613.01
gma-miR159e-5p	247.037	826.467	-1.74219	0.0158621	0.0466711	down	yes	242.73	277.79	220.59	1132.65	733.74	613.01
mes-miR160c	7532.69	2942.19	1.35627	0.025956	0.0749297	up	yes	8616.85	10525.3	3455.88	2894.54	3261.05	2670.99
ppe-miR396a	22007.1	9212.31	1.25633	0.0284713	0.0796829	up	yes	27185.6	27254.8	11580.9	11326.5	8560.25	7750.24
zma-miR393a-5p	1687.19	512.173	1.7199	0.0286442	0.0796829	up	yes	1699.1	1450.71	1911.76	251.7	978.31	306.51
ath-miR858b	757.863	6830.25	-3.17191	0.0377652	0.0953791	down	yes	606.82	1666.77	0	9984.06	6522.09	3984.59
ama-miR156	180881	254809	-0.494376	0.0379893	0.0953791	down	yes	145556	122785	274301	227746	240421	296261
bna-miR156a	180492	254292	-0.494552	0.0380663	0.0953791	down	yes	145232	122199	274044	227284	239768	295823
cme-miR156j	179942	253607	-0.495058	0.0381806	0.0953791	down	yes	144383	121952	273493	226319	239116	295385
gma-miR156k	179984	253607	-0.494728	0.0382536	0.0953791	down	yes	144383	122075	273493	226319	239116	295385
ath-miR156c-5p	180689	254292	-0.492973	0.038428	0.0953791	down	yes	145475	122292	274301	227284	239768	295823
cas-miR156g	180689	254137	-0.492095	0.0386504	0.0953791	down	yes	145475	122292	274301	227158	239605	295648
stu-miR156f-5p	181788	254809	-0.48716	0.0404243	0.0981732	down	yes	145556	122785	277022	227746	240421	296261
ath-miR164c-5p	1049.72	213.677	2.29645	0.0439752	0.0993604	up	yes	364.09	432.13	2352.94	83.9	163.05	394.08
osa-miR164d	1049.72	213.677	2.29645	0.0439752	0.0993604	up	yes	364.09	432.13	2352.94	83.9	163.05	394.08
ata-miR393-5p	1687.19	568.107	1.57037	0.0441716	0.0993604	up	yes	1699.1	1450.71	1911.76	419.5	978.31	306.51
csi-miR393b-5p	1687.19	568.107	1.57037	0.0441716	0.0993604	up	yes	1699.1	1450.71	1911.76	419.5	978.31	306.51
osa-miR393a	1687.19	568.107	1.57037	0.0441716	0.0993604	up	yes	1699.1	1450.71	1911.76	419.5	978.31	306.51
gma-miR156q	180689	248810	-0.461534	0.047255	0.0993604	down	yes	145475	122292	274301	222208	233654	290568
aly-miR172e-3p	1840.79	647.67	1.50698	0.0474072	0.0993604	up	yes	2063.19	2098.89	1360.29	797.05	489.16	656.8
ath-miR172a	1840.79	647.67	1.50698	0.0474072	0.0993604	up	yes	2063.19	2098.89	1360.29	797.05	489.16	656.8
stu-miR172c-3p	1840.79	647.67	1.50698	0.0474072	0.0993604	up	yes	2063.19	2098.89	1360.29	797.05	489.16	656.8
zma-miR172a	1840.79	647.67	1.50698	0.0474072	0.0993604	up	yes	2063.19	2098.89	1360.29	797.05	489.16	656.8
Following miRNAs do not show significant difference (p-value<=0.05).
mtr-miR5225c	0	142.717	-13.801	0.0500065	1	down	no	0	0	0	83.9	81.53	262.72
cca-miR6114-5p	1056.47	2040.66	-0.949775	0.0503642	0.104131	down	no	525.91	1172.91	1470.59	2181.39	2364.26	1576.32
ptc-miR530a	88	418.35	-2.24901	0.0521259	0.106337	down	no	202.27	61.73	0	922.9	244.58	87.57
ath-miR171a-5p	20.5767	224.24	-3.44533	0.0674667	0.135821	down	no	0	61.73	0	83.9	326.1	262.72
ahy-miR156a	12.2533	153.893	-3.6496	0.0842133	1	down	no	0	0	36.76	41.95	244.58	175.15
far-miR156b	12.2533	153.893	-3.6496	0.0842133	1	down	no	0	0	36.76	41.95	244.58	175.15
gma-miR156f	12.2533	153.893	-3.6496	0.0842133	1	down	no	0	0	36.76	41.95	244.58	175.15
sbi-miR156d	12.2533	153.893	-3.6496	0.0842133	1	down	no	0	0	36.76	41.95	244.58	175.15
hbr-miR6485	245.53	14.5967	4.07126	0.0868342	0.172541	up	no	242.73	493.86	0	0	0	43.79
cas-miR319b	278.217	723.02	-1.37779	0.0886397	0.17387	down	no	283.18	0	551.47	1048.75	244.58	875.73
bdi-miR169m	143.377	419.83	-1.54993	0.0937502	0.177362	down	no	202.27	154.33	73.53	545.35	407.63	306.51
mes-miR169f	143.377	419.83	-1.54993	0.0937502	0.177362	down	no	202.27	154.33	73.53	545.35	407.63	306.51
lus-miR397a	401.27	811.69	-1.01634	0.0938973	0.177362	down	no	687.73	185.2	330.88	1006.8	815.26	613.01
stu-miR397-5p	333.847	698.17	-1.06437	0.0985796	0.183935	down	no	485.46	185.2	330.88	922.9	733.74	437.87
bra-miR168b-5p	2914.8	4762.35	-0.708276	0.10199	0.188006	down	no	2831.83	4074.33	1838.24	2978.44	4565.47	6743.15
csi-miR159b-5p	6980.17	3115.99	1.16357	0.103764	0.188999	up	no	4490.47	5494.17	10955.9	4782.28	2201.21	2364.48
ata-miR172c-5p	352.447	43.7867	3.00855	0.115535	0.207963	up	no	161.82	123.46	772.06	0	0	131.36
pab-miR4414	2416.87	984.133	1.29621	0.11865	0.211087	up	no	1982.28	1481.57	3786.76	1468.24	652.21	831.95
atr-miR8577	61.7333	310.517	-2.33036	0.126937	0.223234	down	no	0	185.2	0	587.3	81.53	262.72
pab-miR160c	6905.31	3452.55	1.00004	0.139729	0.242938	up	no	7807.76	9599.36	3308.82	4236.93	3668.68	2452.05
smo-miR396	13065.9	7558.9	0.789563	0.144302	0.244492	up	no	14037.8	11667.4	13492.6	7509.02	6848.2	8319.47
ath-miR160a-5p	7694.46	3973.58	0.95338	0.14533	0.244492	up	no	8697.76	10525.3	3860.29	4572.53	4239.36	3108.85
mes-miR160g	7559.66	3878.07	0.962981	0.148188	0.244492	up	no	8697.76	10525.3	3455.88	4530.58	3994.78	3108.85
csi-miR160a-5p	7694.46	3987.56	0.948312	0.148613	0.244492	up	no	8697.76	10525.3	3860.29	4614.48	4239.36	3108.85
mes-miR160h	7694.46	3987.56	0.948312	0.148613	0.244492	up	no	8697.76	10525.3	3860.29	4614.48	4239.36	3108.85
gma-miR160c	7590.53	3905.25	0.958785	0.150364	0.244741	up	no	8697.76	10617.9	3455.88	4530.58	4076.31	3108.85
csi-miR159a-5p	0	83.7233	-13.0316	0.156025	1	down	no	0	0	0	125.85	81.53	43.79
mtr-miR398a-5p	0	85.1233	-13.0555	0.177946	1	down	no	0	0	0	167.8	0	87.57
mdm-miR397a	71.32	239.987	-1.75043	0.181179	0.286145	down	no	121.36	92.6	0	419.5	81.53	218.93
ptc-miR397b	71.32	239.987	-1.75043	0.181179	0.286145	down	no	121.36	92.6	0	419.5	81.53	218.93
gra-miR166d	3433.15	4672.61	-0.444693	0.185538	0.286145	down	no	1658.64	3457	5183.82	3607.69	5462.25	4947.89
csi-miR166b-5p	3433.15	4657.4	-0.43999	0.187791	0.286145	down	no	1658.64	3457	5183.82	3649.64	5462.25	4860.32
bgy-miR156	138398	79653	0.797019	0.188177	0.286145	up	no	121081	83523.7	210588	47822.8	83727.4	107409
ath-miR157b-5p	138544	79938	0.793393	0.190348	0.286145	up	no	121243	83801.5	210588	48158.4	83808.9	107847
hbr-miR156	138544	79938	0.793393	0.190348	0.286145	up	no	121243	83801.5	210588	48158.4	83808.9	107847
aqc-miR156a	138503	79924	0.793217	0.190763	0.286145	up	no	121243	83678	210588	48116.4	83808.9	107847
bra-miR164e-5p	1135.5	413.55	1.45718	0.206022	0.301939	up	no	364.09	432.13	2610.29	251.7	244.58	744.37
lja-miR164-5p	1135.5	413.55	1.45718	0.206022	0.301939	up	no	364.09	432.13	2610.29	251.7	244.58	744.37
gma-miR169e	216.907	419.83	-0.952699	0.207213	0.301939	down	no	202.27	154.33	294.12	545.35	407.63	306.51
cca-miR169b	0	83.54	-13.0284	0.216484	1	down	no	0	0	0	0	163.05	87.57
cca-miR156b	178897	107321	0.737205	0.222587	0.321281	up	no	140095	119575	277022	80753.4	100522	140687
ppt-miR160b	684.47	292.143	1.22828	0.236794	0.334597	up	no	606.82	895.12	551.47	293.65	407.63	175.15
lja-miR397	71.32	212.02	-1.57169	0.239381	0.334597	down	no	121.36	92.6	0	335.6	81.53	218.93
osa-miR397b	71.32	212.02	-1.57169	0.239381	0.334597	down	no	121.36	92.6	0	335.6	81.53	218.93
bna-miR397a	433.117	669.59	-0.628511	0.242747	0.334597	down	no	525.91	185.2	588.24	880.95	733.74	394.08
nta-miR397	433.117	669.59	-0.628511	0.242747	0.334597	down	no	525.91	185.2	588.24	880.95	733.74	394.08
vvi-miR169p	125.01	0	13.6099	0.260941	1	up	no	80.91	0	294.12	0	0	0
mdm-miR477a	0	81.5267	-12.9932	0.261573	1	down	no	0	0	0	0	244.58	0
csi-miR477b-5p	152.23	340.32	-1.16059	0.261699	0.354336	down	no	364.09	92.6	0	545.35	81.53	394.08
stu-miR477a-5p	152.23	340.32	-1.16059	0.261699	0.354336	down	no	364.09	92.6	0	545.35	81.53	394.08
ata-miR395b-3p	0	68.3333	-12.7386	0.274417	1	down	no	0	0	0	41.95	163.05	0
tae-miR1128	92.5967	0	13.1769	0.313748	1	up	no	0	277.79	0	0	0	0
ath-miR164b-5p	1135.5	509.673	1.15567	0.323339	0.427858	up	no	364.09	432.13	2610.29	251.7	489.16	788.16
gma-miR164b	1135.5	509.673	1.15567	0.323339	0.427858	up	no	364.09	432.13	2610.29	251.7	489.16	788.16
har-miR156c	49.02	151.443	-1.62714	0.327186	0.427858	down	no	0	0	147.06	209.75	244.58	0
ptc-miR156k	49.02	151.443	-1.62714	0.327186	0.427858	down	no	0	0	147.06	209.75	244.58	0
ppt-miR408a	122.063	14.5967	3.06305	0.334211	1	up	no	242.73	123.46	0	0	0	43.79
csi-miR156d-5p	3479.98	2068.67	0.750373	0.334383	0.42992	up	no	4045.47	2129.76	4264.71	1090.7	1875.1	3240.21
csi-miR156e-5p	3479.98	2068.67	0.750373	0.334383	0.42992	up	no	4045.47	2129.76	4264.71	1090.7	1875.1	3240.21
hci-miR156a	153.907	278.95	-0.857909	0.340116	0.433648	down	no	80.91	123.46	257.35	335.6	326.1	175.15
mtr-miR172d-5p	166.9	27.9667	2.57677	0.341456	1	up	no	40.45	92.6	367.65	83.9	0	0
ptc-miR172b-5p	166.9	27.9667	2.57677	0.341456	1	up	no	40.45	92.6	367.65	83.9	0	0
aly-miR165b-5p	0	55.9333	-12.4498	0.354828	1	down	no	0	0	0	167.8	0	0
mdm-miR319b-5p	0	56.3667	-12.4609	0.370513	1	down	no	0	0	0	0	81.53	87.57
cca-miR6111-5p	116274	76545.8	0.603128	0.375598	0.474929	up	no	124681	117816	106324	91744.3	81933.8	55959.4
bdi-miR845	2449.96	1339.38	0.871192	0.393714	0.493756	up	no	4975.93	2006.3	367.65	1300.44	1141.37	1576.32
gma-miR169d	98.04	0	13.2593	0.40833	1	up	no	0	0	294.12	0	0	0
mtr-miR169d-5p	98.04	0	13.2593	0.40833	1	up	no	0	0	294.12	0	0	0
vvi-miR169o	98.04	0	13.2593	0.40833	1	up	no	0	0	294.12	0	0	0
vvi-miR169u	98.04	0	13.2593	0.40833	1	up	no	0	0	294.12	0	0	0
ath-miR169a-5p	148.783	27.9667	2.41101	0.410133	1	up	no	121.36	30.87	294.12	83.9	0	0
ath-miR169f-5p	148.783	27.9667	2.41101	0.410133	1	up	no	121.36	30.87	294.12	83.9	0	0
gma-miR169v	148.783	27.9667	2.41101	0.410133	1	up	no	121.36	30.87	294.12	83.9	0	0
stu-miR319a-5p	0	58.3833	-12.5116	0.411945	1	down	no	0	0	0	0	0	175.15
mtr-miR156g-5p	96.5667	14.5967	2.72505	0.416405	1	up	no	80.91	61.73	147.06	0	0	43.79
ath-miR157c-3p	447.02	222.403	1.00713	0.418452	0.520514	up	no	485.46	524.72	330.88	209.75	326.1	131.36
tae-miR1133	92.5967	14.5967	2.66449	0.427084	1	up	no	0	277.79	0	0	0	43.79
mdm-miR11007	0	41.95	-12.0348	0.442092	1	down	no	0	0	0	125.85	0	0
aly-miR162a-5p	0	43.1733	-12.0763	0.462213	1	down	no	0	0	0	41.95	0	87.57
csi-miR399c-5p	85.7833	0	13.0666	0.462342	1	up	no	0	0	257.35	0	0	0
ath-miR2111a-5p	192.687	57.1567	1.75309	0.471432	0.572453	up	no	485.46	92.6	0	83.9	0	87.57
fve-miR2111c	192.687	57.1567	1.75309	0.471432	0.572453	up	no	485.46	92.6	0	83.9	0	87.57
ptc-miR2111a	192.687	57.1567	1.75309	0.471432	0.572453	up	no	485.46	92.6	0	83.9	0	87.57
zma-miR396h	321.877	140.087	1.20013	0.493265	0.594248	up	no	768.64	123.46	73.53	125.85	163.05	131.36
pab-miR156e	74.0233	126.897	-0.777521	0.49528	1	down	no	80.91	30.87	110.29	167.8	81.53	131.36
csi-miR156i-5p	87.0133	27.1767	1.6785	0.520171	1	up	no	40.45	0	220.59	0	81.53	0
bdi-miR9485	0	27.9667	-11.45	0.521706	1	down	no	0	0	0	83.9	0	0
csi-miR166c-5p	0	27.9667	-11.45	0.521706	1	down	no	0	0	0	83.9	0	0
fve-miR530	0	27.9667	-11.45	0.521706	1	down	no	0	0	0	83.9	0	0
gma-miR10426	0	27.9667	-11.45	0.521706	1	down	no	0	0	0	83.9	0	0
gma-miR167k	0	27.9667	-11.45	0.521706	1	down	no	0	0	0	83.9	0	0
gma-miR5375	0	27.9667	-11.45	0.521706	1	down	no	0	0	0	83.9	0	0
osa-miR530-5p	0	27.9667	-11.45	0.521706	1	down	no	0	0	0	83.9	0	0
seu-miR11045	0	27.9667	-11.45	0.521706	1	down	no	0	0	0	83.9	0	0
tcc-miR530a	0	27.9667	-11.45	0.521706	1	down	no	0	0	0	83.9	0	0
ppt-miR1028a-5p	73.53	0	12.8443	0.524564	1	up	no	0	0	220.59	0	0	0
ppt-miR1028c-5p	73.53	0	12.8443	0.524564	1	up	no	0	0	220.59	0	0	0
ath-miR169h	106.117	194.26	-0.872276	0.525148	0.618059	down	no	121.36	123.46	73.53	0	407.63	175.15
bna-miR169g	106.117	194.26	-0.872276	0.525148	0.618059	down	no	121.36	123.46	73.53	0	407.63	175.15
sbi-miR169d-5p	106.117	194.26	-0.872276	0.525148	0.618059	down	no	121.36	123.46	73.53	0	407.63	175.15
mtr-miR164d	0	28.58	-11.4813	0.534334	1	down	no	0	0	0	41.95	0	43.79
aly-miR159b-5p	0	29.19	-11.5118	0.547792	1	down	no	0	0	0	0	0	87.57
bdi-miR7713-5p	0	29.19	-11.5118	0.547792	1	down	no	0	0	0	0	0	87.57
mtr-miR5209	0	29.19	-11.5118	0.547792	1	down	no	0	0	0	0	0	87.57
mtr-miR5213-5p	0	29.19	-11.5118	0.547792	1	down	no	0	0	0	0	0	87.57
ptc-miR6470	0	29.19	-11.5118	0.547792	1	down	no	0	0	0	0	0	87.57
vvi-miR477b-5p	0	29.19	-11.5118	0.547792	1	down	no	0	0	0	0	0	87.57
aly-miR156g-5p	668.57	824.83	-0.303014	0.549312	0.641563	down	no	890	895.12	220.59	797.05	407.63	1269.81
hbr-miR6482	34.06	82.3167	-1.27286	0.550907	1	down	no	40.45	61.73	0	83.9	163.05	0
fve-miR156j	52.7067	96.3	-0.869426	0.558579	1	down	no	121.36	0	36.76	125.85	163.05	0
ath-miR156h	61.2733	0	12.5813	0.570441	1	up	no	0	0	183.82	0	0	0
smo-miR156c	61.2733	0	12.5813	0.570441	1	up	no	0	0	183.82	0	0	0
gma-miR156g	6652	4602.13	0.531485	0.572477	0.663553	up	no	7969.58	3457	8529.41	2265.29	4973.1	6568
mes-miR477h	26.97	72.9767	-1.43574	0.57708	1	down	no	80.91	0	0	0	0	218.93
gma-miR156e	6695.12	4658.49	0.523246	0.580548	0.667849	up	no	7969.58	3549.6	8566.18	2265.29	5054.62	6655.57
aof-miR168b	271.1	366.343	-0.434357	0.594511	0.678808	down	no	566.37	246.93	0	209.75	407.63	481.65
ptc-miR167h-5p	53.94	0	12.3974	0.596539	1	up	no	161.82	0	0	0	0	0
bdi-miR1127	47.5467	0	12.2154	0.596671	1	up	no	80.91	61.73	0	0	0	0
ath-miR414	41.1533	0	12.0071	0.596803	1	up	no	0	123.46	0	0	0	0
ath-miR5652	41.1533	0	12.0071	0.596803	1	up	no	0	123.46	0	0	0	0
bdi-miR7717c-5p	41.1533	0	12.0071	0.596803	1	up	no	0	123.46	0	0	0	0
mtr-miR2655b	41.1533	0	12.0071	0.596803	1	up	no	0	123.46	0	0	0	0
osa-miR5538	41.1533	0	12.0071	0.596803	1	up	no	0	123.46	0	0	0	0
sly-miR166c-5p	32.83	72.3667	-1.14007	0.617029	1	down	no	0	61.73	36.76	41.95	0	175.15
aof-miR169a	0	14.5967	-10.5124	0.663379	1	down	no	0	0	0	0	0	43.79
ata-miR169j-5p	0	14.5967	-10.5124	0.663379	1	down	no	0	0	0	0	0	43.79
bdi-miR169k-5p	0	14.5967	-10.5124	0.663379	1	down	no	0	0	0	0	0	43.79
osa-miR169r-5p	0	14.5967	-10.5124	0.663379	1	down	no	0	0	0	0	0	43.79
aau-miR168	0	27.1767	-11.4087	0.663379	1	down	no	0	0	0	0	81.53	0
ata-miR166c-5p	0	27.1767	-11.4087	0.663379	1	down	no	0	0	0	0	81.53	0
bra-miR9568-5p	0	27.1767	-11.4087	0.663379	1	down	no	0	0	0	0	81.53	0
csi-miR166f-5p	0	27.1767	-11.4087	0.663379	1	down	no	0	0	0	0	81.53	0
aly-miR165a-5p	0	13.9833	-10.4505	0.663379	1	down	no	0	0	0	41.95	0	0
ath-miR165a-5p	0	13.9833	-10.4505	0.663379	1	down	no	0	0	0	41.95	0	0
mdm-miR164a	0	13.9833	-10.4505	0.663379	1	down	no	0	0	0	41.95	0	0
mdm-miR3627b	0	13.9833	-10.4505	0.663379	1	down	no	0	0	0	41.95	0	0
stu-miR172c-5p	0	13.9833	-10.4505	0.663379	1	down	no	0	0	0	41.95	0	0
stu-miR3627-5p	0	13.9833	-10.4505	0.663379	1	down	no	0	0	0	41.95	0	0
gma-miR5761b	40.4533	0	11.9824	0.67281	1	up	no	121.36	0	0	0	0	0
gma-miR5780d	30.8667	0	11.5923	0.67308	1	up	no	0	92.6	0	0	0	0
gma-miR156p	32.83	0	11.6812	0.683229	1	up	no	0	61.73	36.76	0	0	0
ghr-miR7499	10.29	27.9667	-1.44158	0.687261	1	down	no	0	30.87	0	83.9	0	0
ath-miR156i	12.2533	28.58	-1.22116	0.688132	1	down	no	0	0	36.76	41.95	0	43.79
sly-miR403-5p	153.63	211.227	-0.459306	0.697475	0.781469	down	no	121.36	339.53	0	251.7	163.05	218.93
pab-miR166c	190.923	114.137	0.74218	0.697864	0.781469	up	no	283.18	216.06	73.53	41.95	81.53	218.93
cas-miR11592	383.573	229.857	0.738743	0.699747	0.781469	up	no	687.73	462.99	0	251.7	0	437.87
mes-miR477i	161.773	72.9767	1.14836	0.700951	1	up	no	80.91	0	404.41	0	0	218.93
mtr-miR166e-5p	233.83	127.51	0.874798	0.711006	0.78829	up	no	161.82	61.73	477.94	125.85	81.53	175.15
ssl-miR1078	13.4833	29.19	-1.11372	0.71628	1	down	no	40.45	0	0	0	0	87.57
cca-miR6117	173.543	98.93	0.810753	0.719182	0.791617	up	no	323.64	123.46	73.53	83.9	81.53	131.36
ath-miR5658	61.7333	114.75	-0.894265	0.725948	1	down	no	0	185.2	0	0	81.53	262.72
sly-miR156e-5p	322.533	213.677	0.593996	0.747249	0.816637	up	no	242.73	246.93	477.94	83.9	163.05	394.08
mes-miR397	67.4233	84.3333	-0.322812	0.751138	1	down	no	202.27	0	0	83.9	81.53	87.57
smo-miR156d	167.637	97.5233	0.781457	0.767367	0.832675	up	no	0	61.73	441.18	41.95	163.05	87.57
ghr-miR156c	69.5967	83.7233	-0.266577	0.775105	1	down	no	0	61.73	147.06	125.85	81.53	43.79
mdm-miR156ae	204.4	224.853	-0.137583	0.782674	0.843304	down	no	0	61.73	551.47	41.95	326.1	306.51
ath-miR169b-5p	26.97	0	11.3977	0.785401	1	up	no	80.91	0	0	0	0	0
cme-miR167e	26.97	0	11.3977	0.785401	1	up	no	80.91	0	0	0	0	0
csi-miR159c-5p	26.97	0	11.3977	0.785401	1	up	no	80.91	0	0	0	0	0
fve-miR11300	26.97	0	11.3977	0.785401	1	up	no	80.91	0	0	0	0	0
osa-miR5079b	26.97	0	11.3977	0.785401	1	up	no	80.91	0	0	0	0	0
pab-miR156ab	26.97	0	11.3977	0.785401	1	up	no	80.91	0	0	0	0	0
pab-miR156x	26.97	0	11.3977	0.785401	1	up	no	80.91	0	0	0	0	0
ptc-miR169s	26.97	0	11.3977	0.785401	1	up	no	80.91	0	0	0	0	0
peu-miR2916	141.94	154.683	-0.124028	0.793204	0.848673	down	no	364.09	61.73	0	125.85	163.05	175.15
mdm-miR7122a	24.51	0	11.2597	0.816978	1	up	no	0	0	73.53	0	0	0
pab-miR947	24.51	0	11.2597	0.816978	1	up	no	0	0	73.53	0	0	0
tae-miR167b	24.51	0	11.2597	0.816978	1	up	no	0	0	73.53	0	0	0
osa-miR156l-5p	664.637	683.773	-0.0409517	0.835747	0.887981	down	no	890	956.85	147.06	461.45	407.63	1182.24
ath-miR166a-5p	10.29	14.5967	-0.503983	0.841833	1	down	no	0	30.87	0	0	0	43.79
nta-miR169t	92.6333	110.717	-0.257244	0.85562	1	down	no	80.91	123.46	73.53	0	244.58	87.57
osa-miR169g	92.6333	110.717	-0.257244	0.85562	1	down	no	80.91	123.46	73.53	0	244.58	87.57
ptc-miR169w	92.6333	110.717	-0.257244	0.85562	1	down	no	80.91	123.46	73.53	0	244.58	87.57
sly-miR169e-5p	92.6333	110.717	-0.257244	0.85562	1	down	no	80.91	123.46	73.53	0	244.58	87.57
hbr-miR396a	10377.5	9304.91	0.157394	0.872867	0.913861	up	no	8859.58	12346.4	9926.47	10739.2	9293.98	7881.6
ath-miR393a-5p	604.377	484.563	0.318757	0.879958	0.913861	up	no	809.09	709.92	294.12	419.5	815.26	218.93
csi-miR393a	604.377	484.563	0.318757	0.879958	0.913861	up	no	809.09	709.92	294.12	419.5	815.26	218.93
cca-miR164	6415.95	5062.18	0.341903	0.885445	0.913861	up	no	6877.3	5679.36	6691.18	6921.72	3097.99	5166.83
mtr-miR319a-5p	312.253	248.79	0.327777	0.889969	0.913861	up	no	566.37	370.39	0	125.85	489.16	131.36
pab-miR858a	98.99	82.3167	0.266069	0.916238	1	up	no	80.91	216.06	0	83.9	163.05	0
cas-miR157d	823.313	652.263	0.335982	0.93292	0.939058	up	no	849.55	370.39	1250	377.55	1141.37	437.87
pta-miR156a	823.313	652.263	0.335982	0.93292	0.939058	up	no	849.55	370.39	1250	377.55	1141.37	437.87
pta-miR156b	823.313	652.263	0.335982	0.93292	0.939058	up	no	849.55	370.39	1250	377.55	1141.37	437.87
sly-miR319c-5p	133.753	125.49	0.0919953	0.949286	0.949286	up	no	0	401.26	0	125.85	163.05	87.57
csi-miR530a-5p	61.03	41.95	0.54074	0.961255	1	up	no	121.36	61.73	0	125.85	0	0
mes-miR530b	61.03	41.95	0.54074	0.961255	1	up	no	121.36	61.73	0	125.85	0	0
stu-miR530	61.03	41.95	0.54074	0.961255	1	up	no	121.36	61.73	0	125.85	0	0
csi-miR156g-5p	12.2533	0	10.2601	0.971161	1	up	no	0	0	36.76	0	0	0
pab-miR393a	12.2533	0	10.2601	0.971161	1	up	no	0	0	36.76	0	0	0
vvi-miR3629a-3p	13.4833	0	10.398	0.971161	1	up	no	40.45	0	0	0	0	0
aof-miR160b	10.29	0	10.0084	0.971161	1	up	no	0	30.87	0	0	0	0
osa-miR166b-5p	98.04	83.54	0.230878	0.977794	1	up	no	0	0	294.12	0	163.05	87.57
aly-miR3436-5p	0	0	0	1	1	no change	no	0	0	0	0	0	0
ath-miR413	0	0	0	1	1	no change	no	0	0	0	0	0	0
atr-miR397b	0	0	0	1	1	no change	no	0	0	0	0	0	0
bdi-miR7749-5p	0	0	0	1	1	no change	no	0	0	0	0	0	0
bdi-miR827-5p	0	0	0	1	1	no change	no	0	0	0	0	0	0
cas-miR159c-5	0	0	0	1	1	no change	no	0	0	0	0	0	0
fve-miR11294	0	0	0	1	1	no change	no	0	0	0	0	0	0
ghr-miR3476-5p	0	0	0	1	1	no change	no	0	0	0	0	0	0
gma-miR9763	0	0	0	1	1	no change	no	0	0	0	0	0	0
gra-miR8657c	0	0	0	1	1	no change	no	0	0	0	0	0	0
gra-miR8777	0	0	0	1	1	no change	no	0	0	0	0	0	0
lja-miR11156-5p	0	0	0	1	1	no change	no	0	0	0	0	0	0
mtr-miR5253	0	0	0	1	1	no change	no	0	0	0	0	0	0
osa-miR1320-5p	0	0	0	1	1	no change	no	0	0	0	0	0	0
osa-miR2098-5p	0	0	0	1	1	no change	no	0	0	0	0	0	0
osa-miR414	0	0	0	1	1	no change	no	0	0	0	0	0	0
ptc-miR1446a	0	0	0	1	1	no change	no	0	0	0	0	0	0
rgl-miR7805-5p	0	0	0	1	1	no change	no	0	0	0	0	0	0
tae-miR1117	0	0	0	1	1	no change	no	0	0	0	0	0	0

## Sheet: Fo-12d vs CG
miRNA_id	expression_Fo-12d	expression_ca	log2FC(Fo-12d/ca)	pval	padj	regulate	significant	tpm_Fo-12d-1	tpm_Fo-12d-2	tpm_Fo-12d-3	tpm_ca-1	tpm_ca-2	tpm_ca-3
vvi-miR396a	239721	66373.4	1.85268	4.4615e-17	1.07076e-14	up	yes	239552	299939	179670	63134.5	69867.9	66117.9
vca-miR396-5p	274050	95214.8	1.52518	8.67739e-13	7.56728e-11	up	yes	273046	337146	211958	95100.3	101745	88799.4
osa-miR396c-5p	274159	95577.8	1.52026	9.4591e-13	7.56728e-11	up	yes	273175	337146	212155	95226.1	101745	89762.7
gma-miR396e	252775	89612.6	1.49608	2.21005e-12	1.0063e-10	up	yes	252042	308996	197286	91115	95141	82581.7
sbi-miR396b	252869	89752.4	1.49437	2.44295e-12	1.0063e-10	up	yes	251999	309323	197286	91534.5	95141	82581.7
gma-miR396h	252703	89654.3	1.495	2.51574e-12	1.0063e-10	up	yes	251869	309323	196918	91534.5	94978	82450.3
ppe-miR396a	29329.7	9212.31	1.67072	8.14931e-11	2.79405e-09	up	yes	23769.4	37206.5	27013.1	11326.5	8560.25	7750.24
pab-miR396b	129869	52470	1.30749	2.82785e-09	8.48356e-08	up	yes	124724	157836	107046	53486	46388.4	57535.7
mes-miR160c	8074.89	2942.19	1.45655	1.59873e-06	4.26327e-05	up	yes	9291.67	9289.95	5643.06	2894.54	3261.05	2670.99
ama-miR156	85109.5	254809	-1.58202	9.21493e-06	0.000144035	down	yes	74895.2	63769.2	116664	227746	240421	296261
stu-miR156f-5p	85109.5	254809	-1.58202	9.21493e-06	0.000144035	down	yes	74895.2	63769.2	116664	227746	240421	296261
cme-miR156j	84479	253607	-1.58593	9.41088e-06	0.000144035	down	yes	74506.2	62928.9	116002	226319	239116	295385
gma-miR156k	84495.3	253607	-1.58565	9.48862e-06	0.000144035	down	yes	74506.2	62928.9	116051	226319	239116	295385
ath-miR156c-5p	84872.1	254292	-1.58312	9.51598e-06	0.000144035	down	yes	74679.1	63395.7	116542	227284	239768	295823
bna-miR156a	84872.1	254292	-1.58312	9.51598e-06	0.000144035	down	yes	74679.1	63395.7	116542	227284	239768	295823
cas-miR156g	84863.9	254137	-1.58238	9.60235e-06	0.000144035	down	yes	74679.1	63395.7	116517	227158	239605	295648
gma-miR156q	83985.3	248810	-1.56684	1.22593e-05	0.000173072	down	yes	74117.3	62695.5	115143	222208	233654	290568
cca-miR6114-5p	349.16	2040.66	-2.54704	1.70096e-05	0.000226794	down	yes	259.3	420.15	368.03	2181.39	2364.26	1576.32
bdi-miR845	5418.43	1339.38	2.0163	5.37988e-05	0.000679564	up	yes	1512.6	4855.05	9887.63	1300.44	1141.37	1576.32
pab-miR160c	7935.19	3452.55	1.2006	0.000111667	0.00134	up	yes	9032.37	9056.53	5716.67	4236.93	3668.68	2452.05
fve-miR477a	11275.8	30193.6	-1.42101	0.000128627	0.00136816	down	yes	8254.46	10410.3	15162.7	38468	27066.7	25046
mes-miR477d	11275.8	30193.6	-1.42101	0.000128627	0.00136816	down	yes	8254.46	10410.3	15162.7	38468	27066.7	25046
ath-miR160a-5p	8632.29	3973.58	1.1193	0.000131116	0.00136816	up	yes	9723.84	9990.2	6182.84	4572.53	4239.36	3108.85
csi-miR160a-5p	8632.29	3987.56	1.11423	0.000143256	0.00137526	up	yes	9723.84	9990.2	6182.84	4614.48	4239.36	3108.85
mes-miR160h	8632.29	3987.56	1.11423	0.000143256	0.00137526	up	yes	9723.84	9990.2	6182.84	4614.48	4239.36	3108.85
gma-miR160c	8455.17	3905.25	1.11442	0.000153795	0.00141965	up	yes	9550.97	9803.46	6011.09	4530.58	4076.31	3108.85
mes-miR160g	8315.13	3878.07	1.1004	0.000187389	0.00162335	up	yes	9550.97	9383.32	6011.09	4530.58	3994.78	3108.85
gma-miR171l	381.157	2077.53	-2.44638	0.000189391	0.00162335	down	yes	345.74	233.42	564.31	2516.99	2445.79	1269.81
aqc-miR477e	10945.3	27241.3	-1.31548	0.000407601	0.00337325	down	yes	8254.46	10130.2	14451.1	34818.4	23479.5	23425.9
cca-miR156b	46878.7	107321	-1.19492	0.000533283	0.00426626	down	yes	45291.5	42201.6	53142.9	80753.4	100522	140687
csi-miR477d-5p	12078.9	28518.9	-1.23943	0.000719219	0.00523068	down	yes	9767.06	11110.6	15359	36622.2	24457.8	24476.8
mes-miR477b	12078.9	28518.9	-1.23943	0.000719219	0.00523068	down	yes	9767.06	11110.6	15359	36622.2	24457.8	24476.8
nta-miR477a	12078.9	28518.9	-1.23943	0.000719219	0.00523068	down	yes	9767.06	11110.6	15359	36622.2	24457.8	24476.8
gra-miR167c	3686.07	1500.24	1.29689	0.0010052	0.00670135	up	yes	4753.88	4341.53	1962.8	1174.6	1793.58	1532.53
mdm-miR167h	3686.07	1500.24	1.29689	0.0010052	0.00670135	up	yes	4753.88	4341.53	1962.8	1174.6	1793.58	1532.53
ptc-miR167f-5p	3686.07	1500.24	1.29689	0.0010052	0.00670135	up	yes	4753.88	4341.53	1962.8	1174.6	1793.58	1532.53
fve-miR167d	3669.71	1500.24	1.29047	0.00114669	0.00724228	up	yes	4753.88	4341.53	1913.73	1174.6	1793.58	1532.53
lus-miR167a	3669.71	1500.24	1.29047	0.00114669	0.00724228	up	yes	4753.88	4341.53	1913.73	1174.6	1793.58	1532.53
ctr-miR167	4549.26	2114.5	1.10531	0.00162469	0.00999807	up	yes	5142.83	5928.76	2576.18	1845.79	2527.31	1970.4
ath-miR167d	4989.12	2508.56	0.991924	0.00261493	0.0153069	up	yes	5531.79	6442.28	2993.28	2433.09	2771.89	2320.69
osa-miR167d-5p	4989.12	2508.56	0.991924	0.00261493	0.0153069	up	yes	5531.79	6442.28	2993.28	2433.09	2771.89	2320.69
ppt-miR408a	430.897	14.5967	4.88268	0.00271082	0.0154904	up	yes	605.04	466.83	220.82	0	0	43.79
ath-miR157c-3p	916.25	222.403	2.04251	0.00337719	0.0188495	up	yes	605.04	1260.45	883.26	209.75	326.1	131.36
cca-miR6111-5p	112296	76545.8	0.552905	0.00737547	0.0402298	up	yes	115260	118015	103612	91744.3	81933.8	55959.4
bna-miR167d	5046.74	2857.35	0.820671	0.0130949	0.0698395	up	yes	5704.65	6442.28	2993.28	3397.94	2853.42	2320.69
smo-miR396	10862.3	7558.9	0.52308	0.0190612	0.0994495	up	yes	10069.6	13071.3	9446	7509.02	6848.2	8319.47
osa-miR167a-5p	4391.58	2682.2	0.711319	0.0331197	0.169122	up	yes	5704.65	4574.95	2895.14	3397.94	2853.42	1795.25
zma-miR393a-5p	1119.79	512.173	1.12851	0.0390372	0.195186	up	yes	864.34	1587.23	907.8	251.7	978.31	306.51
aof-miR393a	1304.65	659.1	0.985079	0.0481817	0.222405	up	yes	993.99	1914.01	1005.94	461.45	815.26	700.59
ppe-miR393a	1304.65	659.1	0.985079	0.0481817	0.222405	up	yes	993.99	1914.01	1005.94	461.45	815.26	700.59
Following miRNAs do not show significant difference (p-value<=0.05).
ahy-miR156a	0	153.893	-13.9097	0.0500412	0.222405	down	no	0	0	0	41.95	244.58	175.15
far-miR156b	0	153.893	-13.9097	0.0500412	0.222405	down	no	0	0	0	41.95	244.58	175.15
gma-miR156f	0	153.893	-13.9097	0.0500412	0.222405	down	no	0	0	0	41.95	244.58	175.15
sbi-miR156d	0	153.893	-13.9097	0.0500412	0.222405	down	no	0	0	0	41.95	244.58	175.15
gma-miR168b	6874.75	11595.6	-0.754197	0.0540251	0.234685	down	no	7346.9	6162.18	7115.17	11032.8	10924.5	12829.5
ath-miR168a-5p	6899.28	11595.6	-0.749058	0.0567155	0.234685	down	no	7346.9	6162.18	7188.77	11032.8	10924.5	12829.5
cme-miR168	6899.28	11595.6	-0.749058	0.0567155	0.234685	down	no	7346.9	6162.18	7188.77	11032.8	10924.5	12829.5
lja-miR168-5p	6899.28	11595.6	-0.749058	0.0567155	0.234685	down	no	7346.9	6162.18	7188.77	11032.8	10924.5	12829.5
ata-miR393-5p	1119.79	568.107	0.978982	0.0601977	0.236844	up	no	864.34	1587.23	907.8	419.5	978.31	306.51
csi-miR393b-5p	1119.79	568.107	0.978982	0.0601977	0.236844	up	no	864.34	1587.23	907.8	419.5	978.31	306.51
osa-miR393a	1119.79	568.107	0.978982	0.0601977	0.236844	up	no	864.34	1587.23	907.8	419.5	978.31	306.51
atr-miR390.1	163.867	577.393	-1.81697	0.0619464	0.239793	down	no	86.43	233.42	171.75	335.6	652.21	744.37
vvi-miR394c	2235.21	4151.84	-0.893339	0.0775857	0.295565	down	no	2593.02	2100.74	2011.87	6292.47	3097.99	3065.07
aly-miR166g-5p	4556.8	7603.63	-0.738664	0.0809853	0.300294	down	no	4581.01	4574.95	4514.45	6334.42	9864.67	6611.79
csi-miR399b-5p	121.46	0	13.5683	0.0824905	0.300294	up	no	172.87	93.37	98.14	0	0	0
ath-miR390b-5p	163.867	549.427	-1.74534	0.083832	0.300294	down	no	86.43	233.42	171.75	251.7	652.21	744.37
gma-miR390e	163.867	549.427	-1.74534	0.083832	0.300294	down	no	86.43	233.42	171.75	251.7	652.21	744.37
osa-miR5538	125.377	0	13.6141	0.0940125	0.331809	up	no	302.52	0	73.61	0	0	0
ath-miR394a	2326.27	4151.84	-0.835733	0.0978985	0.335652	down	no	2679.46	2287.47	2011.87	6292.47	3097.99	3065.07
cas-miR394	2326.27	4151.84	-0.835733	0.0978985	0.335652	down	no	2679.46	2287.47	2011.87	6292.47	3097.99	3065.07
sly-miR156e-5p	24.5367	213.677	-3.1219	0.122407	0.40891	down	no	0	0	73.61	83.9	163.05	394.08
cas-miR11592	605.263	229.857	1.39679	0.122673	0.40891	up	no	821.12	700.25	294.42	251.7	0	437.87
hbr-miR396a	11403.3	9304.91	0.293389	0.143024	0.470215	up	no	12489.7	13304.7	8415.53	10739.2	9293.98	7881.6
ath-miR858b	4218.15	6830.25	-0.695327	0.159726	0.51803	down	no	4451.36	4154.8	4048.28	9984.06	6522.09	3984.59
cca-miR164	3154.68	5062.18	-0.682265	0.165294	0.52894	down	no	2636.24	3221.14	3606.65	6921.72	3097.99	5166.83
sly-miR166c-5p	249.13	72.3667	1.78336	0.179617	0.567211	up	no	172.87	280.1	294.42	41.95	0	175.15
csi-miR156d-5p	1189.04	2068.67	-0.798901	0.1853	0.570154	down	no	691.47	1820.64	1055.01	1090.7	1875.1	3240.21
csi-miR156e-5p	1189.04	2068.67	-0.798901	0.1853	0.570154	down	no	691.47	1820.64	1055.01	1090.7	1875.1	3240.21
fve-miR156j	0	96.3	-13.2335	0.188258	0.571924	down	no	0	0	0	125.85	163.05	0
hci-miR156a	57.25	278.95	-2.28446	0.194605	0.583814	down	no	0	0	171.75	335.6	326.1	175.15
mtr-miR166e-5p	306.753	127.51	1.2664	0.20219	0.599081	up	no	345.74	280.1	294.42	125.85	81.53	175.15
osa-miR156l-5p	300.51	683.773	-1.18608	0.209706	0.613772	down	no	86.43	373.47	441.63	461.45	407.63	1182.24
aly-miR156g-5p	418.067	824.83	-0.980347	0.216147	0.625004	down	no	345.74	466.83	441.63	797.05	407.63	1269.81
hbr-miR6485	119.493	14.5967	3.03235	0.221859	0.633882	up	no	0	186.73	171.75	0	0	43.79
aof-miR395a	461.673	931.033	-1.01194	0.28897	0.783017	down	no	864.34	373.47	147.21	587.3	1549	656.8
ath-miR395d	461.673	931.033	-1.01194	0.28897	0.783017	down	no	864.34	373.47	147.21	587.3	1549	656.8
sly-miR395a	461.673	931.033	-1.01194	0.28897	0.783017	down	no	864.34	373.47	147.21	587.3	1549	656.8
tae-miR395b	461.673	931.033	-1.01194	0.28897	0.783017	down	no	864.34	373.47	147.21	587.3	1549	656.8
mtr-miR5225c	39.3033	142.717	-1.86016	0.290369	0.783017	down	no	0	93.37	24.54	83.9	81.53	262.72
gma-miR156e	3142.31	4658.49	-0.568038	0.296847	0.788526	down	no	2593.02	4061.44	2772.46	2265.29	5054.62	6655.57
csi-miR396e-5p	337047	317079	0.0881061	0.302268	0.788526	up	no	359004	292797	359340	335934	319175	296129
mdm-miR396f	337047	317079	0.0881061	0.302268	0.788526	up	no	359004	292797	359340	335934	319175	296129
gma-miR156g	3134.13	4602.13	-0.554235	0.310661	0.801031	down	no	2593.02	4061.44	2747.93	2265.29	4973.1	6568
lja-miR11156-5p	93.3667	0	13.1888	0.313737	0.801031	up	no	0	280.1	0	0	0	0
mdm-miR477a	0	81.5267	-12.9932	0.319267	0.806568	down	no	0	0	0	0	244.58	0
ata-miR395b-3p	0	68.3333	-12.7386	0.335763	0.839407	down	no	0	0	0	41.95	163.05	0
csi-miR477b-5p	136.287	340.32	-1.32018	0.357695	0.851712	down	no	43.22	46.68	318.96	545.35	81.53	394.08
stu-miR477a-5p	136.287	340.32	-1.32018	0.357695	0.851712	down	no	43.22	46.68	318.96	545.35	81.53	394.08
ath-miR2111a-5p	0	57.1567	-12.481	0.358429	0.851712	down	no	0	0	0	83.9	0	87.57
fve-miR2111c	0	57.1567	-12.481	0.358429	0.851712	down	no	0	0	0	83.9	0	87.57
ptc-miR2111a	0	57.1567	-12.481	0.358429	0.851712	down	no	0	0	0	83.9	0	87.57
csi-miR159b-5p	3686.29	3115.99	0.242478	0.366047	0.861286	up	no	3803.1	3968.07	3287.7	4782.28	2201.21	2364.48
ath-miR166a-5p	73.98	14.5967	2.3407	0.37841	0.868256	up	no	172.87	0	49.07	0	0	43.79
bdi-miR169m	599.807	419.83	0.514682	0.396133	0.868256	up	no	345.74	840.3	613.38	545.35	407.63	306.51
gma-miR169e	599.807	419.83	0.514682	0.396133	0.868256	up	no	345.74	840.3	613.38	545.35	407.63	306.51
mes-miR169f	599.807	419.83	0.514682	0.396133	0.868256	up	no	345.74	840.3	613.38	545.35	407.63	306.51
pab-miR399e	59.9333	0	12.5494	0.396862	0.868256	up	no	86.43	93.37	0	0	0	0
csi-miR530a-5p	163.79	41.95	1.96485	0.39795	0.868256	up	no	0	466.83	24.54	125.85	0	0
mes-miR530b	163.79	41.95	1.96485	0.39795	0.868256	up	no	0	466.83	24.54	125.85	0	0
stu-miR530	163.79	41.95	1.96485	0.39795	0.868256	up	no	0	466.83	24.54	125.85	0	0
stu-miR319a-5p	0	58.3833	-12.5116	0.401727	0.868599	down	no	0	0	0	0	0	175.15
mtr-miR5253	57.6233	0	12.4927	0.405539	0.869013	up	no	172.87	0	0	0	0	0
aly-miR165b-5p	0	55.9333	-12.4498	0.410842	0.87248	down	no	0	0	0	167.8	0	0
ath-miR157b-5p	59693.6	79938	-0.421304	0.43008	0.87248	down	no	52681.6	58167.2	68232	48158.4	83808.9	107847
hbr-miR156	59693.6	79938	-0.421304	0.43008	0.87248	down	no	52681.6	58167.2	68232	48158.4	83808.9	107847
aqc-miR156a	59693.6	79924	-0.421052	0.43073	0.87248	down	no	52681.6	58167.2	68232	48116.4	83808.9	107847
bgy-miR156	59553.5	79653	-0.419542	0.43445	0.87248	down	no	52595.2	57980.5	68084.8	47822.8	83727.4	107409
fve-miR530	117.107	27.9667	2.06565	0.43624	0.87248	up	no	0	326.78	24.54	83.9	0	0
osa-miR530-5p	117.107	27.9667	2.06565	0.43624	0.87248	up	no	0	326.78	24.54	83.9	0	0
tcc-miR530a	117.107	27.9667	2.06565	0.43624	0.87248	up	no	0	326.78	24.54	83.9	0	0
mtr-miR319a-5p	105.897	248.79	-1.23219	0.461412	0.880386	down	no	172.87	46.68	98.14	125.85	489.16	131.36
bra-miR168b-5p	3512.75	4762.35	-0.439074	0.47693	0.880386	down	no	4019.19	3501.24	3017.81	2978.44	4565.47	6743.15
aly-miR162a-5p	0	43.1733	-12.0763	0.480721	0.880386	down	no	0	0	0	41.95	0	87.57
cas-miR157d	403.587	652.263	-0.692562	0.485476	0.880386	down	no	216.09	700.25	294.42	377.55	1141.37	437.87
pta-miR156a	403.587	652.263	-0.692562	0.485476	0.880386	down	no	216.09	700.25	294.42	377.55	1141.37	437.87
pta-miR156b	403.587	652.263	-0.692562	0.485476	0.880386	down	no	216.09	700.25	294.42	377.55	1141.37	437.87
atr-miR8577	174.01	310.517	-0.835464	0.488135	0.880386	down	no	259.3	140.05	122.68	587.3	81.53	262.72
ath-miR5658	32.7133	114.75	-1.81023	0.506415	0.880386	down	no	0	0	98.14	0	81.53	262.72
pab-miR156e	51.3967	126.897	-1.30374	0.511365	0.880386	down	no	129.65	0	24.54	167.8	81.53	131.36
ata-miR172c-5p	0	43.7867	-12.0966	0.516919	0.880386	down	no	0	0	0	0	0	131.36
lja-miR397	111.313	212.02	-0.929512	0.517347	0.880386	down	no	0	186.73	147.21	335.6	81.53	218.93
osa-miR397b	111.313	212.02	-0.929512	0.517347	0.880386	down	no	0	186.73	147.21	335.6	81.53	218.93
mdm-miR11007	0	41.95	-12.0348	0.522092	0.880386	down	no	0	0	0	125.85	0	0
har-miR156c	63.8367	151.443	-1.24619	0.547363	0.880386	down	no	0	93.37	98.14	209.75	244.58	0
ptc-miR156k	63.8367	151.443	-1.24619	0.547363	0.880386	down	no	0	93.37	98.14	209.75	244.58	0
cas-miR319b	501.38	723.02	-0.528122	0.547955	0.880386	down	no	475.39	513.51	515.24	1048.75	244.58	875.73
sly-miR319c-5p	59.9333	125.49	-1.06602	0.55379	0.880386	down	no	86.43	93.37	0	125.85	163.05	87.57
cca-miR169b	31.1233	83.54	-1.42418	0.556197	0.880386	down	no	0	93.37	0	0	163.05	87.57
zma-miR396h	208.25	140.087	0.571963	0.556615	0.880386	up	no	388.95	186.73	49.07	125.85	163.05	131.36
cca-miR6117	40.0967	98.93	-1.30271	0.562587	0.880386	down	no	0	46.68	73.61	83.9	81.53	131.36
eun-miR397a-5p	3770.91	5114.19	-0.439591	0.576299	0.880386	down	no	3068.41	3828.02	4416.31	8767.51	5217.67	1357.39
osa-miR397a	3770.91	5114.19	-0.439591	0.576299	0.880386	down	no	3068.41	3828.02	4416.31	8767.51	5217.67	1357.39
sly-miR397-5p	3770.91	5114.19	-0.439591	0.576299	0.880386	down	no	3068.41	3828.02	4416.31	8767.51	5217.67	1357.39
csi-miR156i-5p	45.1667	27.1767	0.732679	0.582188	0.880386	up	no	86.43	0	49.07	0	81.53	0
osa-miR166b-5p	138.533	83.54	0.729626	0.583816	0.880386	up	no	86.43	280.1	49.07	0	163.05	87.57
ptc-miR530a	269.31	418.35	-0.635424	0.58619	0.880386	down	no	0	513.51	294.42	922.9	244.58	87.57
ath-miR169a-5p	72.0167	27.9667	1.36431	0.588105	0.880386	up	no	0	93.37	122.68	83.9	0	0
ath-miR169f-5p	72.0167	27.9667	1.36431	0.588105	0.880386	up	no	0	93.37	122.68	83.9	0	0
gma-miR169v	72.0167	27.9667	1.36431	0.588105	0.880386	up	no	0	93.37	122.68	83.9	0	0
cas-miR159c-5	46.6833	0	12.189	0.588983	0.880386	up	no	0	140.05	0	0	0	0
fve-miR11294	46.6833	0	12.189	0.588983	0.880386	up	no	0	140.05	0	0	0	0
ath-miR171a-5p	98.14	224.24	-1.19205	0.597601	0.880386	down	no	0	0	294.42	83.9	326.1	262.72
bdi-miR7713-5p	0	29.19	-11.5118	0.60485	0.880386	down	no	0	0	0	0	0	87.57
mtr-miR5209	0	29.19	-11.5118	0.60485	0.880386	down	no	0	0	0	0	0	87.57
ptc-miR6470	0	29.19	-11.5118	0.60485	0.880386	down	no	0	0	0	0	0	87.57
ssl-miR1078	0	29.19	-11.5118	0.60485	0.880386	down	no	0	0	0	0	0	87.57
vvi-miR477b-5p	0	29.19	-11.5118	0.60485	0.880386	down	no	0	0	0	0	0	87.57
ath-miR156i	0	28.58	-11.4813	0.606883	0.880386	down	no	0	0	0	41.95	0	43.79
bdi-miR9485	0	27.9667	-11.45	0.608934	0.880386	down	no	0	0	0	83.9	0	0
csi-miR166c-5p	0	27.9667	-11.45	0.608934	0.880386	down	no	0	0	0	83.9	0	0
ghr-miR7499	0	27.9667	-11.45	0.608934	0.880386	down	no	0	0	0	83.9	0	0
gma-miR10426	0	27.9667	-11.45	0.608934	0.880386	down	no	0	0	0	83.9	0	0
gma-miR167k	0	27.9667	-11.45	0.608934	0.880386	down	no	0	0	0	83.9	0	0
gma-miR5375	0	27.9667	-11.45	0.608934	0.880386	down	no	0	0	0	83.9	0	0
mtr-miR172d-5p	0	27.9667	-11.45	0.608934	0.880386	down	no	0	0	0	83.9	0	0
seu-miR11045	0	27.9667	-11.45	0.608934	0.880386	down	no	0	0	0	83.9	0	0
hbr-miR6482	30.7633	82.3167	-1.41968	0.643046	0.892081	down	no	43.22	0	49.07	83.9	163.05	0
mtr-miR398a-5p	44.37	85.1233	-0.939814	0.645085	0.892081	down	no	86.43	46.68	0	167.8	0	87.57
ath-miR413	28.81	0	11.4929	0.651523	0.892081	up	no	86.43	0	0	0	0	0
bdi-miR827-5p	28.81	0	11.4929	0.651523	0.892081	up	no	86.43	0	0	0	0	0
ghr-miR3476-5p	28.81	0	11.4929	0.651523	0.892081	up	no	86.43	0	0	0	0	0
gma-miR5780d	28.81	0	11.4929	0.651523	0.892081	up	no	86.43	0	0	0	0	0
gma-miR9763	28.81	0	11.4929	0.651523	0.892081	up	no	86.43	0	0	0	0	0
tae-miR1117	28.81	0	11.4929	0.651523	0.892081	up	no	86.43	0	0	0	0	0
mdm-miR397a	158.793	239.987	-0.595773	0.654193	0.892081	down	no	0	280.1	196.28	419.5	81.53	218.93
ptc-miR397b	158.793	239.987	-0.595773	0.654193	0.892081	down	no	0	280.1	196.28	419.5	81.53	218.93
mes-miR477i	115.233	72.9767	0.658978	0.669399	0.90233	up	no	129.65	93.37	122.68	0	0	218.93
ptc-miR172b-5p	57.6233	27.9667	1.04268	0.693072	0.90233	up	no	172.87	0	0	83.9	0	0
ath-miR414	31.1233	0	11.6042	0.697266	0.90233	up	no	0	93.37	0	0	0	0
gra-miR8777	31.1233	0	11.6042	0.697266	0.90233	up	no	0	93.37	0	0	0	0
csi-miR159a-5p	47.48	83.7233	-0.818178	0.700865	0.90233	down	no	0	93.37	49.07	125.85	81.53	43.79
gma-miR159a-5p	592.56	826.467	-0.479989	0.70345	0.90233	down	no	302.52	420.15	1055.01	1132.65	733.74	613.01
gma-miR159e-5p	592.56	826.467	-0.479989	0.70345	0.90233	down	no	302.52	420.15	1055.01	1132.65	733.74	613.01
ath-miR169h	122.177	194.26	-0.668976	0.709679	0.90233	down	no	86.43	280.1	0	0	407.63	175.15
bna-miR169g	122.177	194.26	-0.668976	0.709679	0.90233	down	no	86.43	280.1	0	0	407.63	175.15
sbi-miR169d-5p	122.177	194.26	-0.668976	0.709679	0.90233	down	no	86.43	280.1	0	0	407.63	175.15
gra-miR166d	3807.79	4672.61	-0.295273	0.718199	0.90233	down	no	3630.23	4014.75	3778.4	3607.69	5462.25	4947.89
ath-miR393a-5p	495.15	484.563	0.0311798	0.721994	0.90233	up	no	432.17	513.51	539.77	419.5	815.26	218.93
csi-miR393a	495.15	484.563	0.0311798	0.721994	0.90233	up	no	432.17	513.51	539.77	419.5	815.26	218.93
fve-miR159a-5p	4657.44	5722.94	-0.297218	0.723263	0.90233	down	no	4105.62	4248.17	5618.53	5369.58	5625.31	6173.92
mdm-miR164a	46.6833	13.9833	1.73848	0.724037	0.90233	up	no	0	140.05	0	41.95	0	0
csi-miR166b-5p	3807.79	4657.4	-0.29057	0.728344	0.90233	down	no	3630.23	4014.75	3778.4	3649.64	5462.25	4860.32
stu-miR397-5p	568.173	698.17	-0.297243	0.730321	0.90233	down	no	216.09	1120.4	368.03	922.9	733.74	437.87
aly-miR165a-5p	0	13.9833	-10.4505	0.74326	1	down	no	0	0	0	41.95	0	0
aof-miR169a	0	14.5967	-10.5124	0.74326	1	down	no	0	0	0	0	0	43.79
ata-miR166c-5p	0	27.1767	-11.4087	0.74326	0.90233	down	no	0	0	0	0	81.53	0
ata-miR169j-5p	0	14.5967	-10.5124	0.74326	1	down	no	0	0	0	0	0	43.79
ath-miR165a-5p	0	13.9833	-10.4505	0.74326	1	down	no	0	0	0	41.95	0	0
bdi-miR169k-5p	0	14.5967	-10.5124	0.74326	1	down	no	0	0	0	0	0	43.79
bra-miR9568-5p	0	27.1767	-11.4087	0.74326	0.90233	down	no	0	0	0	0	81.53	0
csi-miR166f-5p	0	27.1767	-11.4087	0.74326	0.90233	down	no	0	0	0	0	81.53	0
mdm-miR3627b	0	13.9833	-10.4505	0.74326	1	down	no	0	0	0	41.95	0	0
mtr-miR156g-5p	0	14.5967	-10.5124	0.74326	1	down	no	0	0	0	0	0	43.79
osa-miR169r-5p	0	14.5967	-10.5124	0.74326	1	down	no	0	0	0	0	0	43.79
stu-miR172c-5p	0	13.9833	-10.4505	0.74326	1	down	no	0	0	0	41.95	0	0
stu-miR3627-5p	0	13.9833	-10.4505	0.74326	1	down	no	0	0	0	41.95	0	0
smo-miR156d	59.9333	97.5233	-0.702296	0.74961	0.90233	down	no	86.43	93.37	0	41.95	163.05	87.57
bna-miR397a	763.89	669.59	0.190084	0.755358	0.90233	up	no	432.17	1540.54	318.96	880.95	733.74	394.08
pab-miR4414	1068.75	984.133	0.118998	0.763962	0.90233	up	no	691.47	1680.59	834.19	1468.24	652.21	831.95
ath-miR156h	16.3567	0	10.6765	0.7745	0.90233	up	no	0	0	49.07	0	0	0
osa-miR1320-5p	16.3567	0	10.6765	0.7745	0.90233	up	no	0	0	49.07	0	0	0
osa-miR2098-5p	16.3567	0	10.6765	0.7745	0.90233	up	no	0	0	49.07	0	0	0
osa-miR414	16.3567	0	10.6765	0.7745	0.90233	up	no	0	0	49.07	0	0	0
ptc-miR167h-5p	16.3567	0	10.6765	0.7745	0.90233	up	no	0	0	49.07	0	0	0
rgl-miR7805-5p	16.3567	0	10.6765	0.7745	0.90233	up	no	0	0	49.07	0	0	0
smo-miR156c	16.3567	0	10.6765	0.7745	0.90233	up	no	0	0	49.07	0	0	0
aof-miR168b	393.893	366.343	0.104606	0.780839	0.905321	up	no	302.52	560.2	318.96	209.75	407.63	481.65
ghr-miR156c	55.66	83.7233	-0.588902	0.801396	0.924688	down	no	0	93.37	73.61	125.85	81.53	43.79
ath-miR164c-5p	226.547	213.677	0.0843751	0.845028	0.965746	up	no	129.65	280.1	269.89	83.9	163.05	394.08
osa-miR164d	226.547	213.677	0.0843751	0.845028	0.965746	up	no	129.65	280.1	269.89	83.9	163.05	394.08
ath-miR164b-5p	418.067	509.673	-0.285834	0.868661	0.970208	down	no	345.74	466.83	441.63	251.7	489.16	788.16
gma-miR164b	418.067	509.673	-0.285834	0.868661	0.970208	down	no	345.74	466.83	441.63	251.7	489.16	788.16
tae-miR1133	31.1233	14.5967	1.09183	0.872033	0.970208	up	no	0	93.37	0	0	0	43.79
aly-miR159b-5p	16.3567	29.19	-0.835208	0.878269	0.970208	down	no	0	0	49.07	0	0	87.57
mtr-miR164d	46.6833	28.58	0.707706	0.880842	0.970208	up	no	0	140.05	0	41.95	0	43.79
aly-miR3436-5p	8.18	0	9.67772	0.885607	1	up	no	0	0	24.54	0	0	0
bdi-miR7749-5p	8.18	0	9.67772	0.885607	1	up	no	0	0	24.54	0	0	0
csi-miR156g-5p	8.18	0	9.67772	0.885607	1	up	no	0	0	24.54	0	0	0
gma-miR5761b	8.18	0	9.67772	0.885607	1	up	no	0	0	24.54	0	0	0
gra-miR8657c	8.18	0	9.67772	0.885607	1	up	no	0	0	24.54	0	0	0
mtr-miR2655b	14.4067	0	10.4935	0.885607	0.970208	up	no	43.22	0	0	0	0	0
pab-miR156ab	8.18	0	9.67772	0.885607	1	up	no	0	0	24.54	0	0	0
pab-miR156x	8.18	0	9.67772	0.885607	1	up	no	0	0	24.54	0	0	0
ptc-miR1446a	8.18	0	9.67772	0.885607	1	up	no	0	0	24.54	0	0	0
tae-miR167b	8.18	0	9.67772	0.885607	1	up	no	0	0	24.54	0	0	0
atr-miR397b	15.56	0	10.6046	0.885607	1	up	no	0	46.68	0	0	0	0
mdm-miR319b-5p	46.6833	56.3667	-0.271882	0.896852	0.970208	down	no	0	140.05	0	0	81.53	87.57
pab-miR858a	58.7767	82.3167	-0.485871	0.900462	0.970208	down	no	129.65	46.68	0	83.9	163.05	0
aly-miR172e-3p	580.713	647.67	-0.15743	0.904795	0.970208	down	no	605.04	793.61	343.49	797.05	489.16	656.8
ath-miR172a	580.713	647.67	-0.15743	0.904795	0.970208	down	no	605.04	793.61	343.49	797.05	489.16	656.8
stu-miR172c-3p	580.713	647.67	-0.15743	0.904795	0.970208	down	no	605.04	793.61	343.49	797.05	489.16	656.8
zma-miR172a	580.713	647.67	-0.15743	0.904795	0.970208	down	no	605.04	793.61	343.49	797.05	489.16	656.8
osa-miR169g	93.3667	110.717	-0.245869	0.907664	0.970208	down	no	0	280.1	0	0	244.58	87.57
ptc-miR169w	93.3667	110.717	-0.245869	0.907664	0.970208	down	no	0	280.1	0	0	244.58	87.57
lus-miR397a	745.643	811.69	-0.122442	0.914048	0.970208	down	no	345.74	1400.49	490.7	1006.8	815.26	613.01
peu-miR2916	138.533	154.683	-0.159074	0.918893	0.970208	down	no	86.43	280.1	49.07	125.85	163.05	175.15
aau-miR168	14.4067	27.1767	-0.915162	0.92179	0.970208	down	no	43.22	0	0	0	81.53	0
mdm-miR156ae	170.53	224.853	-0.398938	0.925601	0.970208	down	no	172.87	93.37	245.35	41.95	326.1	306.51
bra-miR164e-5p	362.413	413.55	-0.190421	0.938154	0.970208	down	no	345.74	373.47	368.03	251.7	244.58	744.37
lja-miR164-5p	362.413	413.55	-0.190421	0.938154	0.970208	down	no	345.74	373.47	368.03	251.7	244.58	744.37
nta-miR397	691.863	669.59	0.0472084	0.939953	0.970208	up	no	216.09	1540.54	318.96	880.95	733.74	394.08
mes-miR477h	69.7033	72.9767	-0.0661983	0.944876	0.970208	down	no	86.43	0	122.68	0	0	218.93
mes-miR397	80.1933	84.3333	-0.0726118	0.946755	0.970208	down	no	0	93.37	147.21	83.9	81.53	87.57
ppt-miR160b	253.77	292.143	-0.203147	0.948189	0.970208	down	no	216.09	373.47	171.75	293.65	407.63	175.15
sly-miR403-5p	194.27	211.227	-0.120723	0.953474	0.970208	down	no	172.87	140.05	269.89	251.7	163.05	218.93
zma-miR166c-5p	26301.6	29455.7	-0.163399	0.96151	0.970208	down	no	28393.6	24602	25909	28358.1	30409.3	29599.8
pab-miR166c	103.137	114.137	-0.146192	0.961941	0.970208	down	no	0	186.73	122.68	41.95	81.53	218.93
mtr-miR5213-5p	31.1233	29.19	0.0924917	0.962122	0.970208	up	no	0	93.37	0	0	0	87.57
nta-miR169t	107.773	110.717	-0.0388686	0.985129	0.985129	down	no	43.22	280.1	0	0	244.58	87.57
sly-miR169e-5p	107.773	110.717	-0.0388686	0.985129	0.985129	down	no	43.22	280.1	0	0	244.58	87.57
aof-miR160b	0	0	0	1	1	no change	no	0	0	0	0	0	0
ath-miR169b-5p	0	0	0	1	1	no change	no	0	0	0	0	0	0
ath-miR5652	0	0	0	1	1	no change	no	0	0	0	0	0	0
bdi-miR1127	0	0	0	1	1	no change	no	0	0	0	0	0	0
bdi-miR7717c-5p	0	0	0	1	1	no change	no	0	0	0	0	0	0
cme-miR167e	0	0	0	1	1	no change	no	0	0	0	0	0	0
csi-miR159c-5p	0	0	0	1	1	no change	no	0	0	0	0	0	0
csi-miR399c-5p	0	0	0	1	1	no change	no	0	0	0	0	0	0
fve-miR11300	0	0	0	1	1	no change	no	0	0	0	0	0	0
gma-miR156p	0	0	0	1	1	no change	no	0	0	0	0	0	0
gma-miR169d	0	0	0	1	1	no change	no	0	0	0	0	0	0
mdm-miR7122a	0	0	0	1	1	no change	no	0	0	0	0	0	0
mtr-miR169d-5p	0	0	0	1	1	no change	no	0	0	0	0	0	0
osa-miR5079b	0	0	0	1	1	no change	no	0	0	0	0	0	0
pab-miR393a	0	0	0	1	1	no change	no	0	0	0	0	0	0
pab-miR947	0	0	0	1	1	no change	no	0	0	0	0	0	0
ppt-miR1028a-5p	0	0	0	1	1	no change	no	0	0	0	0	0	0
ppt-miR1028c-5p	0	0	0	1	1	no change	no	0	0	0	0	0	0
ptc-miR169s	0	0	0	1	1	no change	no	0	0	0	0	0	0
tae-miR1128	0	0	0	1	1	no change	no	0	0	0	0	0	0
vvi-miR169o	0	0	0	1	1	no change	no	0	0	0	0	0	0
vvi-miR169p	0	0	0	1	1	no change	no	0	0	0	0	0	0
vvi-miR169u	0	0	0	1	1	no change	no	0	0	0	0	0	0
vvi-miR3629a-3p	0	0	0	1	1	no change	no	0	0	0	0	0	0

## Sheet: Fo-6d vs Fo-12d
miRNA_id	expression_Fo-12d	expression_Fo-6d	log2FC(Fo-12d/Fo-6d)	pval	padj	regulate	significant	tpm_Fo-12d-1	tpm_Fo-12d-2	tpm_Fo-12d-3	tpm_Fo-6d-1	tpm_Fo-6d-2	tpm_Fo-6d-3
csi-miR477d-5p	12078.9	1540	2.97148	2.11689e-13	1.02316e-11	up	yes	9767.06	11110.6	15359	2063.19	1049.45	1507.35
mes-miR477b	12078.9	1540	2.97148	2.11689e-13	1.02316e-11	up	yes	9767.06	11110.6	15359	2063.19	1049.45	1507.35
nta-miR477a	12078.9	1540	2.97148	2.11689e-13	1.02316e-11	up	yes	9767.06	11110.6	15359	2063.19	1049.45	1507.35
aqc-miR477e	10945.3	1267.47	3.11028	6.0348e-13	2.13829e-11	up	yes	8254.46	10130.2	14451.1	1982.28	864.25	955.88
fve-miR477a	11275.8	1353.26	3.05872	8.84808e-13	2.13829e-11	up	yes	8254.46	10410.3	15162.7	1982.28	864.25	1213.24
mes-miR477d	11275.8	1353.26	3.05872	8.84808e-13	2.13829e-11	up	yes	8254.46	10410.3	15162.7	1982.28	864.25	1213.24
csi-miR399b-5p	121.46	2724.46	-4.4873	1.84367e-07	3.81902e-06	down	yes	172.87	93.37	98.14	1011.37	2345.82	4816.18
eun-miR397a-5p	3770.91	844.36	2.15897	1.69403e-06	2.72927e-05	up	yes	3068.41	3828.02	4416.31	1173.19	771.65	588.24
osa-miR397a	3770.91	844.36	2.15897	1.69403e-06	2.72927e-05	up	yes	3068.41	3828.02	4416.31	1173.19	771.65	588.24
sly-miR397-5p	3770.91	758.573	2.31354	2.22907e-06	3.23216e-05	up	yes	3068.41	3828.02	4416.31	1173.19	771.65	330.88
cca-miR156b	46878.7	178897	-1.93213	0.000116557	0.00153644	down	yes	45291.5	42201.6	53142.9	140095	119575	277022
zma-miR166c-5p	26301.6	8493.71	1.63068	0.000193468	0.00233774	up	yes	28393.6	24602	25909	3762.29	14476.2	7242.65
pab-miR399e	59.9333	1023.56	-4.09387	0.000325564	0.00363129	down	yes	86.43	93.37	0	364.09	1419.84	1286.76
csi-miR396e-5p	337047	153288	1.13671	0.00118583	0.011463	up	yes	359004	292797	359340	155710	223748	80404.4
mdm-miR396f	337047	153288	1.13671	0.00118583	0.011463	up	yes	359004	292797	359340	155710	223748	80404.4
ath-miR394a	2326.27	620.953	1.90544	0.00280485	0.0239237	up	yes	2679.46	2287.47	2011.87	647.28	1142.05	73.53
cas-miR394	2326.27	620.953	1.90544	0.00280485	0.0239237	up	yes	2679.46	2287.47	2011.87	647.28	1142.05	73.53
vvi-miR394c	2235.21	620.953	1.84784	0.00379411	0.029187	up	yes	2593.02	2100.74	2011.87	647.28	1142.05	73.53
ata-miR172c-5p	0	352.447	-15.1052	0.0038245	0.029187	down	yes	0	0	0	161.82	123.46	772.06
aof-miR395a	461.673	41.1533	3.48747	0.0116674	0.0732914	up	yes	864.34	373.47	147.21	0	123.46	0
ath-miR395d	461.673	41.1533	3.48747	0.0116674	0.0732914	up	yes	864.34	373.47	147.21	0	123.46	0
sly-miR395a	461.673	41.1533	3.48747	0.0116674	0.0732914	up	yes	864.34	373.47	147.21	0	123.46	0
tae-miR395b	461.673	41.1533	3.48747	0.0116674	0.0732914	up	yes	864.34	373.47	147.21	0	123.46	0
csi-miR156d-5p	1189.04	3479.98	-1.54927	0.0126364	0.0732914	down	yes	691.47	1820.64	1055.01	4045.47	2129.76	4264.71
csi-miR156e-5p	1189.04	3479.98	-1.54927	0.0126364	0.0732914	down	yes	691.47	1820.64	1055.01	4045.47	2129.76	4264.71
bdi-miR169m	599.807	143.377	2.06461	0.0169085	0.0791243	up	yes	345.74	840.3	613.38	202.27	154.33	73.53
mes-miR169f	599.807	143.377	2.06461	0.0169085	0.0791243	up	yes	345.74	840.3	613.38	202.27	154.33	73.53
aly-miR172e-3p	580.713	1840.79	-1.66441	0.0169162	0.0791243	down	yes	605.04	793.61	343.49	2063.19	2098.89	1360.29
ath-miR172a	580.713	1840.79	-1.66441	0.0169162	0.0791243	down	yes	605.04	793.61	343.49	2063.19	2098.89	1360.29
stu-miR172c-3p	580.713	1840.79	-1.66441	0.0169162	0.0791243	down	yes	605.04	793.61	343.49	2063.19	2098.89	1360.29
zma-miR172a	580.713	1840.79	-1.66441	0.0169162	0.0791243	down	yes	605.04	793.61	343.49	2063.19	2098.89	1360.29
fve-miR159a-5p	4657.44	2682.42	0.795998	0.0193638	0.087742	up	yes	4105.62	4248.17	5618.53	2305.92	2469.29	3272.06
ath-miR168a-5p	6899.28	4164	0.728476	0.0223001	0.0923862	up	yes	7346.9	6162.18	7188.77	4247.74	5339.84	2904.41
cme-miR168	6899.28	4164	0.728476	0.0223001	0.0923862	up	yes	7346.9	6162.18	7188.77	4247.74	5339.84	2904.41
lja-miR168-5p	6899.28	4164	0.728476	0.0223001	0.0923862	up	yes	7346.9	6162.18	7188.77	4247.74	5339.84	2904.41
gma-miR168b	6874.75	4164	0.723337	0.0229732	0.0925308	up	yes	7346.9	6162.18	7115.17	4247.74	5339.84	2904.41
bgy-miR156	59553.5	138398	-1.21656	0.0270583	0.0990108	down	yes	52595.2	57980.5	68084.8	121081	83523.7	210588
ath-miR157b-5p	59693.6	138544	-1.2147	0.0271892	0.0990108	down	yes	52681.6	58167.2	68232	121243	83801.5	210588
hbr-miR156	59693.6	138544	-1.2147	0.0271892	0.0990108	down	yes	52681.6	58167.2	68232	121243	83801.5	210588
aqc-miR156a	59693.6	138503	-1.21427	0.0273133	0.0990108	down	yes	52681.6	58167.2	68232	121243	83678	210588
ath-miR164c-5p	226.547	1049.72	-2.21207	0.0361472	0.124794	down	yes	129.65	280.1	269.89	364.09	432.13	2352.94
osa-miR164d	226.547	1049.72	-2.21207	0.0361472	0.124794	down	yes	129.65	280.1	269.89	364.09	432.13	2352.94
sly-miR166c-5p	249.13	32.83	2.92343	0.0489917	0.165205	up	yes	172.87	280.1	294.42	0	61.73	36.76
Following miRNAs do not show significant difference (p-value<=0.05).
sly-miR156e-5p	24.5367	322.533	-3.71589	0.0581484	0.190179	down	no	0	0	73.61	242.73	246.93	477.94
gma-miR169e	599.807	216.907	1.46738	0.059021	0.190179	up	no	345.74	840.3	613.38	202.27	154.33	294.12
mtr-miR172d-5p	0	166.9	-14.0268	0.0605644	1	down	no	0	0	0	40.45	92.6	367.65
ath-miR858b	4218.15	757.863	2.47658	0.0620557	0.19561	up	no	4451.36	4154.8	4048.28	606.82	1666.77	0
gma-miR156e	3142.31	6695.12	-1.09128	0.0653969	0.201756	down	no	2593.02	4061.44	2772.46	7969.58	3549.6	8566.18
gma-miR156g	3134.13	6652	-1.08572	0.0688674	0.204943	down	no	2593.02	4061.44	2747.93	7969.58	3457	8529.41
ath-miR2111a-5p	0	192.687	-14.234	0.0744338	1	down	no	0	0	0	485.46	92.6	0
fve-miR2111c	0	192.687	-14.234	0.0744338	1	down	no	0	0	0	485.46	92.6	0
ptc-miR2111a	0	192.687	-14.234	0.0744338	1	down	no	0	0	0	485.46	92.6	0
cca-miR6114-5p	349.16	1056.47	-1.59726	0.0766684	0.204943	down	no	259.3	420.15	368.03	525.91	1172.91	1470.59
ppt-miR408a	430.897	122.063	1.81963	0.0768398	0.204943	up	no	605.04	466.83	220.82	242.73	123.46	0
gma-miR171l	381.157	99.2667	1.9409	0.0792201	0.204943	up	no	345.74	233.42	564.31	40.45	0	257.35
cca-miR164	3154.68	6415.95	-1.02417	0.0796674	0.204943	down	no	2636.24	3221.14	3606.65	6877.3	5679.36	6691.18
ath-miR157c-3p	916.25	447.02	1.03539	0.0804059	0.204943	up	no	605.04	1260.45	883.26	485.46	524.72	330.88
gma-miR159a-5p	592.56	247.037	1.2622	0.0810277	0.204943	up	no	302.52	420.15	1055.01	242.73	277.79	220.59
gma-miR159e-5p	592.56	247.037	1.2622	0.0810277	0.204943	up	no	302.52	420.15	1055.01	242.73	277.79	220.59
gma-miR156q	83985.3	180689	-1.1053	0.0822233	0.204943	down	no	74117.3	62695.5	115143	145475	122292	274301
stu-miR156f-5p	85109.5	181788	-1.09486	0.0865196	0.204943	down	no	74895.2	63769.2	116664	145556	122785	277022
cas-miR156g	84863.9	180689	-1.09029	0.0883068	0.204943	down	no	74679.1	63395.7	116517	145475	122292	274301
ath-miR156c-5p	84872.1	180689	-1.09015	0.0883867	0.204943	down	no	74679.1	63395.7	116542	145475	122292	274301
gma-miR156k	84495.3	179984	-1.09092	0.0884133	0.204943	down	no	74506.2	62928.9	116051	144383	122075	273493
cme-miR156j	84479	179942	-1.09087	0.0884388	0.204943	down	no	74506.2	62928.9	116002	144383	121952	273493
ama-miR156	85109.5	180881	-1.08765	0.0886995	0.204943	down	no	74895.2	63769.2	116664	145556	122785	274301
bna-miR156a	84872.1	180492	-1.08857	0.0890441	0.204943	down	no	74679.1	63395.7	116542	145232	122199	274044
pab-miR4414	1068.75	2416.87	-1.17721	0.0940788	0.213147	down	no	691.47	1680.59	834.19	1982.28	1481.57	3786.76
ppe-miR396a	29329.7	22007.1	0.414393	0.108643	0.241569	up	no	23769.4	37206.5	27013.1	27185.6	27254.8	11580.9
bra-miR164e-5p	362.413	1135.5	-1.6476	0.111621	0.241569	down	no	345.74	373.47	368.03	364.09	432.13	2610.29
lja-miR164-5p	362.413	1135.5	-1.6476	0.111621	0.241569	down	no	345.74	373.47	368.03	364.09	432.13	2610.29
ctr-miR167	4549.26	8269.08	-0.862095	0.123291	0.247967	down	no	5142.83	5928.76	2576.18	9385.49	8951.17	6470.59
ath-miR390b-5p	163.867	20.5767	2.99283	0.123636	1	up	no	86.43	233.42	171.75	0	61.73	0
atr-miR390.1	163.867	20.5767	2.99283	0.123636	1	up	no	86.43	233.42	171.75	0	61.73	0
gma-miR390e	163.867	20.5767	2.99283	0.123636	1	up	no	86.43	233.42	171.75	0	61.73	0
mdm-miR167h	3686.07	6958.61	-0.916714	0.1246	0.247967	down	no	4753.88	4341.53	1962.8	7969.58	7685.66	5220.59
ptc-miR167f-5p	3686.07	6958.61	-0.916714	0.1246	0.247967	down	no	4753.88	4341.53	1962.8	7969.58	7685.66	5220.59
gra-miR167c	3686.07	6948.32	-0.914579	0.125728	0.247967	down	no	4753.88	4341.53	1962.8	7969.58	7654.79	5220.59
fve-miR167d	3669.71	6904.67	-0.911903	0.128089	0.247967	down	no	4753.88	4341.53	1913.73	7807.76	7685.66	5220.59
lus-miR167a	3669.71	6904.67	-0.911903	0.128089	0.247967	down	no	4753.88	4341.53	1913.73	7807.76	7685.66	5220.59
aof-miR393a	1304.65	2649.24	-1.02192	0.128259	0.247967	down	no	993.99	1914.01	1005.94	2548.65	1759.37	3639.71
ppe-miR393a	1304.65	2649.24	-1.02192	0.128259	0.247967	down	no	993.99	1914.01	1005.94	2548.65	1759.37	3639.71
ppt-miR160b	253.77	684.47	-1.43143	0.146312	0.279147	down	no	216.09	373.47	171.75	606.82	895.12	551.47
csi-miR159b-5p	3686.29	6980.17	-0.921091	0.14916	0.280885	down	no	3803.1	3968.07	3287.7	4490.47	5494.17	10955.9
fve-miR530	117.107	0	13.5157	0.15449	1	up	no	0	326.78	24.54	0	0	0
osa-miR530-5p	117.107	0	13.5157	0.15449	1	up	no	0	326.78	24.54	0	0	0
tcc-miR530a	117.107	0	13.5157	0.15449	1	up	no	0	326.78	24.54	0	0	0
vvi-miR169p	0	125.01	-13.6099	0.161124	1	down	no	0	0	0	80.91	0	294.12
ath-miR164b-5p	418.067	1135.5	-1.44151	0.166652	0.30588	down	no	345.74	466.83	441.63	364.09	432.13	2610.29
gma-miR164b	418.067	1135.5	-1.44151	0.166652	0.30588	down	no	345.74	466.83	441.63	364.09	432.13	2610.29
bdi-miR845	5418.43	2449.96	1.14511	0.168943	0.306209	up	no	1512.6	4855.05	9887.63	4975.93	2006.3	367.65
osa-miR167d-5p	4989.12	8434.75	-0.75756	0.185138	0.330442	down	no	5531.79	6442.28	2993.28	9385.49	9043.77	6875
ath-miR167d	4989.12	8421.27	-0.755252	0.186871	0.330442	down	no	5531.79	6442.28	2993.28	9345.04	9043.77	6875
lus-miR397a	745.643	401.27	0.893896	0.195796	0.342054	up	no	345.74	1400.49	490.7	687.73	185.2	330.88
mtr-miR156g-5p	0	96.5667	-13.2375	0.198289	1	down	no	0	0	0	80.91	61.73	147.06
bna-miR167d	5046.74	8434.75	-0.740994	0.202041	0.348761	down	no	5704.65	6442.28	2993.28	9385.49	9043.77	6875
osa-miR167a-5p	4391.58	7498.93	-0.771943	0.225356	0.384431	down	no	5704.65	4574.95	2895.14	8333.67	8611.64	5551.47
ptc-miR530a	269.31	88	1.61358	0.242699	0.409202	up	no	0	513.51	294.42	202.27	61.73	0
bna-miR397a	763.89	433.117	0.818595	0.261497	0.435829	up	no	432.17	1540.54	318.96	525.91	185.2	588.24
gma-miR169d	0	98.04	-13.2593	0.278429	1	down	no	0	0	0	0	0	294.12
mtr-miR169d-5p	0	98.04	-13.2593	0.278429	1	down	no	0	0	0	0	0	294.12
vvi-miR169o	0	98.04	-13.2593	0.278429	1	down	no	0	0	0	0	0	294.12
vvi-miR169u	0	98.04	-13.2593	0.278429	1	down	no	0	0	0	0	0	294.12
lja-miR11156-5p	93.3667	0	13.1888	0.279345	1	up	no	0	280.1	0	0	0	0
tae-miR1128	0	92.5967	-13.1769	0.283558	1	down	no	0	0	0	0	277.79	0
bra-miR168b-5p	3512.75	2914.8	0.269202	0.286183	0.471552	up	no	4019.19	3501.24	3017.81	2831.83	4074.33	1838.24
cas-miR319b	501.38	278.217	0.849673	0.29037	0.473075	up	no	475.39	513.51	515.24	283.18	0	551.47
ath-miR166a-5p	73.98	10.29	2.84469	0.302351	1	up	no	172.87	0	49.07	0	30.87	0
stu-miR397-5p	568.173	333.847	0.767128	0.304585	0.477916	up	no	216.09	1120.4	368.03	485.46	185.2	330.88
cas-miR157d	403.587	823.313	-1.02854	0.306526	0.477916	down	no	216.09	700.25	294.42	849.55	370.39	1250
pta-miR156a	403.587	823.313	-1.02854	0.306526	0.477916	down	no	216.09	700.25	294.42	849.55	370.39	1250
pta-miR156b	403.587	823.313	-1.02854	0.306526	0.477916	down	no	216.09	700.25	294.42	849.55	370.39	1250
aly-miR166g-5p	4556.8	3759.55	0.277461	0.317083	0.489117	up	no	4581.01	4574.95	4514.45	1739.55	3950.86	5588.24
ath-miR171a-5p	98.14	20.5767	2.25328	0.325134	1	up	no	0	0	294.42	0	61.73	0
csi-miR399c-5p	0	85.7833	-13.0666	0.327907	1	down	no	0	0	0	0	0	257.35
pab-miR160c	7935.19	6905.31	0.200558	0.346651	0.527968	up	no	9032.37	9056.53	5716.67	7807.76	9599.36	3308.82
cca-miR6117	40.0967	173.543	-2.11347	0.347897	1	down	no	0	46.68	73.61	323.64	123.46	73.53
atr-miR8577	174.01	61.7333	1.4949	0.349633	0.527968	up	no	259.3	140.05	122.68	0	185.2	0
hbr-miR396a	11403.3	10377.5	0.135996	0.353192	0.527968	up	no	12489.7	13304.7	8415.53	8859.58	12346.4	9926.47
mtr-miR5253	57.6233	0	12.4927	0.363655	1	up	no	172.87	0	0	0	0	0
cas-miR11592	605.263	383.573	0.658047	0.374578	0.54104	up	no	821.12	700.25	294.42	687.73	462.99	0
ath-miR160a-5p	8632.29	7694.46	0.165923	0.376862	0.54104	up	no	9723.84	9990.2	6182.84	8697.76	10525.3	3860.29
csi-miR160a-5p	8632.29	7694.46	0.165923	0.376862	0.54104	up	no	9723.84	9990.2	6182.84	8697.76	10525.3	3860.29
mes-miR160h	8632.29	7694.46	0.165923	0.376862	0.54104	up	no	9723.84	9990.2	6182.84	8697.76	10525.3	3860.29
nta-miR397	691.863	433.117	0.675719	0.382999	0.544459	up	no	216.09	1540.54	318.96	525.91	185.2	588.24
osa-miR156l-5p	300.51	664.637	-1.14513	0.387341	0.545285	down	no	86.43	373.47	441.63	890	956.85	147.06
ppt-miR1028a-5p	0	73.53	-12.8443	0.387382	1	down	no	0	0	0	0	0	220.59
ppt-miR1028c-5p	0	73.53	-12.8443	0.387382	1	down	no	0	0	0	0	0	220.59
osa-miR5538	125.377	41.1533	1.60695	0.400242	1	up	no	302.52	0	73.61	0	123.46	0
gma-miR160c	8455.17	7590.53	0.155634	0.404624	0.562107	up	no	9550.97	9803.46	6011.09	8697.76	10617.9	3455.88
mtr-miR319a-5p	105.897	312.253	-1.55997	0.407043	0.562107	down	no	172.87	46.68	98.14	566.37	370.39	0
mes-miR160g	8315.13	7559.66	0.137417	0.421013	0.575913	up	no	9550.97	9383.32	6011.09	8697.76	10525.3	3455.88
csi-miR159a-5p	47.48	0	12.2134	0.4362	1	up	no	0	93.37	49.07	0	0	0
mdm-miR397a	158.793	71.32	1.15466	0.443099	0.594901	up	no	0	280.1	196.28	121.36	92.6	0
ptc-miR397b	158.793	71.32	1.15466	0.443099	0.594901	up	no	0	280.1	196.28	121.36	92.6	0
mtr-miR398a-5p	44.37	0	12.1157	0.455296	1	up	no	86.43	46.68	0	0	0	0
csi-miR166b-5p	3807.79	3433.15	0.14942	0.459766	0.606055	up	no	3630.23	4014.75	3778.4	1658.64	3457	5183.82
gra-miR166d	3807.79	3433.15	0.14942	0.459766	0.606055	up	no	3630.23	4014.75	3778.4	1658.64	3457	5183.82
mes-miR477h	69.7033	26.97	1.36954	0.462942	1	up	no	86.43	0	122.68	80.91	0	0
csi-miR530a-5p	163.79	61.03	1.42411	0.464696	1	up	no	0	466.83	24.54	121.36	61.73	0
mes-miR530b	163.79	61.03	1.42411	0.464696	1	up	no	0	466.83	24.54	121.36	61.73	0
stu-miR530	163.79	61.03	1.42411	0.464696	1	up	no	0	466.83	24.54	121.36	61.73	0
smo-miR156d	59.9333	167.637	-1.48375	0.465942	0.608663	down	no	86.43	93.37	0	0	61.73	441.18
aof-miR168b	393.893	271.1	0.538963	0.474855	0.61049	up	no	302.52	560.2	318.96	566.37	246.93	0
mes-miR160c	8074.89	7532.69	0.100278	0.475762	0.61049	up	no	9291.67	9289.95	5643.06	8616.85	10525.3	3455.88
cas-miR159c-5	46.6833	0	12.189	0.486763	1	up	no	0	140.05	0	0	0	0
fve-miR11294	46.6833	0	12.189	0.486763	1	up	no	0	140.05	0	0	0	0
mdm-miR164a	46.6833	0	12.189	0.486763	1	up	no	0	140.05	0	0	0	0
mdm-miR319b-5p	46.6833	0	12.189	0.486763	1	up	no	0	140.05	0	0	0	0
mtr-miR164d	46.6833	0	12.189	0.486763	1	up	no	0	140.05	0	0	0	0
ata-miR393-5p	1119.79	1687.19	-0.59139	0.49688	0.612488	down	no	864.34	1587.23	907.8	1699.1	1450.71	1911.76
csi-miR393b-5p	1119.79	1687.19	-0.59139	0.49688	0.612488	down	no	864.34	1587.23	907.8	1699.1	1450.71	1911.76
osa-miR393a	1119.79	1687.19	-0.59139	0.49688	0.612488	down	no	864.34	1587.23	907.8	1699.1	1450.71	1911.76
zma-miR393a-5p	1119.79	1687.19	-0.59139	0.49688	0.612488	down	no	864.34	1587.23	907.8	1699.1	1450.71	1911.76
ptc-miR172b-5p	57.6233	166.9	-1.5341	0.498439	0.612488	down	no	172.87	0	0	40.45	92.6	367.65
mtr-miR5225c	39.3033	0	11.9408	0.505506	1	up	no	0	93.37	24.54	0	0	0
fve-miR156j	0	52.7067	-12.364	0.511628	1	down	no	0	0	0	121.36	0	36.76
cca-miR6111-5p	112296	116274	-0.0502235	0.518793	0.632143	down	no	115260	118015	103612	124681	117816	106324
bdi-miR1127	0	47.5467	-12.2154	0.524834	1	down	no	0	0	0	80.91	61.73	0
ath-miR5652	0	41.1533	-12.0071	0.536523	1	down	no	0	0	0	0	123.46	0
bdi-miR7717c-5p	0	41.1533	-12.0071	0.536523	1	down	no	0	0	0	0	123.46	0
tae-miR1133	31.1233	92.5967	-1.57266	0.543619	1	down	no	0	93.37	0	0	277.79	0
ath-miR413	28.81	0	11.4929	0.544735	1	up	no	86.43	0	0	0	0	0
bdi-miR827-5p	28.81	0	11.4929	0.544735	1	up	no	86.43	0	0	0	0	0
ghr-miR3476-5p	28.81	0	11.4929	0.544735	1	up	no	86.43	0	0	0	0	0
gma-miR9763	28.81	0	11.4929	0.544735	1	up	no	86.43	0	0	0	0	0
tae-miR1117	28.81	0	11.4929	0.544735	1	up	no	86.43	0	0	0	0	0
mtr-miR166e-5p	306.753	233.83	0.391604	0.546173	0.659958	up	no	345.74	280.1	294.42	161.82	61.73	477.94
cca-miR169b	31.1233	0	11.6042	0.587182	1	up	no	0	93.37	0	0	0	0
gra-miR8777	31.1233	0	11.6042	0.587182	1	up	no	0	93.37	0	0	0	0
mtr-miR5213-5p	31.1233	0	11.6042	0.587182	1	up	no	0	93.37	0	0	0	0
gma-miR156p	0	32.83	-11.6812	0.597871	1	down	no	0	0	0	0	61.73	36.76
sly-miR319c-5p	59.9333	133.753	-1.15801	0.605476	1	down	no	86.43	93.37	0	0	401.26	0
hbr-miR6485	119.493	245.53	-1.03891	0.610454	0.729566	down	no	0	186.73	171.75	242.73	493.86	0
pab-miR396b	129869	132164	-0.0252785	0.613842	0.729566	down	no	124724	157836	107046	143129	184394	68970.6
hci-miR156a	57.25	153.907	-1.42655	0.625213	0.73704	down	no	0	0	171.75	80.91	123.46	257.35
aly-miR156g-5p	418.067	668.57	-0.677333	0.633845	0.74119	down	no	345.74	466.83	441.63	890	895.12	220.59
aly-miR159b-5p	16.3567	0	10.6765	0.642035	1	up	no	0	0	49.07	0	0	0
osa-miR1320-5p	16.3567	0	10.6765	0.642035	1	up	no	0	0	49.07	0	0	0
osa-miR2098-5p	16.3567	0	10.6765	0.642035	1	up	no	0	0	49.07	0	0	0
osa-miR414	16.3567	0	10.6765	0.642035	1	up	no	0	0	49.07	0	0	0
rgl-miR7805-5p	16.3567	0	10.6765	0.642035	1	up	no	0	0	49.07	0	0	0
lja-miR397	111.313	71.32	0.642175	0.646867	1	up	no	0	186.73	147.21	121.36	92.6	0
osa-miR397b	111.313	71.32	0.642175	0.646867	1	up	no	0	186.73	147.21	121.36	92.6	0
sly-miR403-5p	194.27	153.63	0.338584	0.662387	0.763716	up	no	172.87	140.05	269.89	121.36	339.53	0
pab-miR166c	103.137	190.923	-0.888372	0.669526	0.763716	down	no	0	186.73	122.68	283.18	216.06	73.53
ath-miR169a-5p	72.0167	148.783	-1.04671	0.679444	0.763716	down	no	0	93.37	122.68	121.36	30.87	294.12
ath-miR169f-5p	72.0167	148.783	-1.04671	0.679444	0.763716	down	no	0	93.37	122.68	121.36	30.87	294.12
gma-miR169v	72.0167	148.783	-1.04671	0.679444	0.763716	down	no	0	93.37	122.68	121.36	30.87	294.12
ath-miR156h	16.3567	61.2733	-1.90473	0.679597	1	down	no	0	0	49.07	0	0	183.82
smo-miR156c	16.3567	61.2733	-1.90473	0.679597	1	down	no	0	0	49.07	0	0	183.82
mdm-miR7122a	0	24.51	-11.2597	0.684432	1	down	no	0	0	0	0	0	73.53
pab-miR947	0	24.51	-11.2597	0.684432	1	down	no	0	0	0	0	0	73.53
mtr-miR2655b	14.4067	41.1533	-1.51362	0.686133	1	down	no	43.22	0	0	0	123.46	0
ath-miR169b-5p	0	26.97	-11.3977	0.693236	1	down	no	0	0	0	80.91	0	0
cme-miR167e	0	26.97	-11.3977	0.693236	1	down	no	0	0	0	80.91	0	0
csi-miR159c-5p	0	26.97	-11.3977	0.693236	1	down	no	0	0	0	80.91	0	0
fve-miR11300	0	26.97	-11.3977	0.693236	1	down	no	0	0	0	80.91	0	0
osa-miR5079b	0	26.97	-11.3977	0.693236	1	down	no	0	0	0	80.91	0	0
ptc-miR169s	0	26.97	-11.3977	0.693236	1	down	no	0	0	0	80.91	0	0
aau-miR168	14.4067	0	10.4935	0.758507	1	up	no	43.22	0	0	0	0	0
aly-miR3436-5p	8.18	0	9.67772	0.758507	1	up	no	0	0	24.54	0	0	0
atr-miR397b	15.56	0	10.6046	0.758507	1	up	no	0	46.68	0	0	0	0
bdi-miR7749-5p	8.18	0	9.67772	0.758507	1	up	no	0	0	24.54	0	0	0
gra-miR8657c	8.18	0	9.67772	0.758507	1	up	no	0	0	24.54	0	0	0
ptc-miR1446a	8.18	0	9.67772	0.758507	1	up	no	0	0	24.54	0	0	0
mes-miR397	80.1933	67.4233	0.2502	0.760092	1	up	no	0	93.37	147.21	202.27	0	0
gma-miR5761b	8.18	40.4533	-2.30468	0.760682	1	down	no	0	0	24.54	121.36	0	0
osa-miR166b-5p	138.533	98.04	0.498748	0.761793	0.849692	up	no	86.43	280.1	49.07	0	0	294.12
ptc-miR167h-5p	16.3567	53.94	-1.72086	0.777744	1	down	no	0	0	49.07	161.82	0	0
pab-miR858a	58.7767	98.99	-0.75194	0.780639	1	down	no	129.65	46.68	0	80.91	216.06	0
csi-miR156i-5p	45.1667	87.0133	-0.945824	0.799525	1	down	no	86.43	0	49.07	40.45	0	220.59
zma-miR396h	208.25	321.877	-0.628167	0.803538	0.889412	down	no	388.95	186.73	49.07	768.64	123.46	73.53
har-miR156c	63.8367	49.02	0.380947	0.809602	1	up	no	0	93.37	98.14	0	0	147.06
ptc-miR156k	63.8367	49.02	0.380947	0.809602	1	up	no	0	93.37	98.14	0	0	147.06
csi-miR477b-5p	136.287	152.23	-0.159597	0.820083	0.891964	down	no	43.22	46.68	318.96	364.09	92.6	0
stu-miR477a-5p	136.287	152.23	-0.159597	0.820083	0.891964	down	no	43.22	46.68	318.96	364.09	92.6	0
vvi-miR396a	239721	298423	-0.316005	0.824298	0.891964	down	no	239552	299939	179670	363202	323353	208713
ath-miR5658	32.7133	61.7333	-0.915964	0.865309	1	down	no	0	0	98.14	0	185.2	0
tae-miR167b	8.18	24.51	-1.58202	0.866695	1	down	no	0	0	24.54	0	0	73.53
ahy-miR156a	0	12.2533	-10.2601	0.869761	1	down	no	0	0	0	0	0	36.76
aof-miR160b	0	10.29	-10.0084	0.869761	1	down	no	0	0	0	0	30.87	0
ath-miR156i	0	12.2533	-10.2601	0.869761	1	down	no	0	0	0	0	0	36.76
far-miR156b	0	12.2533	-10.2601	0.869761	1	down	no	0	0	0	0	0	36.76
ghr-miR7499	0	10.29	-10.0084	0.869761	1	down	no	0	0	0	0	30.87	0
gma-miR156f	0	12.2533	-10.2601	0.869761	1	down	no	0	0	0	0	0	36.76
pab-miR393a	0	12.2533	-10.2601	0.869761	1	down	no	0	0	0	0	0	36.76
sbi-miR156d	0	12.2533	-10.2601	0.869761	1	down	no	0	0	0	0	0	36.76
ssl-miR1078	0	13.4833	-10.398	0.869761	1	down	no	0	0	0	40.45	0	0
vvi-miR3629a-3p	0	13.4833	-10.398	0.869761	1	down	no	0	0	0	40.45	0	0
ath-miR414	31.1233	41.1533	-0.4029	0.870368	1	down	no	0	93.37	0	0	123.46	0
pab-miR156ab	8.18	26.97	-1.71995	0.875922	1	down	no	0	0	24.54	80.91	0	0
pab-miR156x	8.18	26.97	-1.71995	0.875922	1	down	no	0	0	24.54	80.91	0	0
ath-miR169h	122.177	106.117	0.2033	0.890193	1	up	no	86.43	280.1	0	121.36	123.46	73.53
bna-miR169g	122.177	106.117	0.2033	0.890193	1	up	no	86.43	280.1	0	121.36	123.46	73.53
sbi-miR169d-5p	122.177	106.117	0.2033	0.890193	1	up	no	86.43	280.1	0	121.36	123.46	73.53
mes-miR477i	115.233	161.773	-0.48938	0.903164	0.970065	down	no	129.65	93.37	122.68	80.91	0	404.41
peu-miR2916	138.533	141.94	-0.0350456	0.914407	0.974919	down	no	86.43	280.1	49.07	364.09	61.73	0
nta-miR169t	107.773	92.6333	0.218375	0.915683	1	up	no	43.22	280.1	0	80.91	123.46	73.53
sly-miR169e-5p	107.773	92.6333	0.218375	0.915683	1	up	no	43.22	280.1	0	80.91	123.46	73.53
hbr-miR6482	30.7633	34.06	-0.146821	0.928973	1	down	no	43.22	0	49.07	40.45	61.73	0
pab-miR156e	51.3967	74.0233	-0.52622	0.929683	1	down	no	129.65	0	24.54	80.91	30.87	110.29
csi-miR156g-5p	8.18	12.2533	-0.582416	0.94281	1	down	no	0	0	24.54	0	0	36.76
ghr-miR156c	55.66	69.5967	-0.322325	0.949574	1	down	no	0	93.37	73.61	0	61.73	147.06
smo-miR396	10862.3	13065.9	-0.266482	0.951488	0.999957	down	no	10069.6	13071.3	9446	14037.8	11667.4	13492.6
vca-miR396-5p	274050	319874	-0.223063	0.962342	0.999957	down	no	273046	337146	211958	376431	349219	233971
osa-miR396c-5p	274159	320018	-0.223141	0.962458	0.999957	down	no	273175	337146	212155	376431	349651	233971
mdm-miR156ae	170.53	204.4	-0.261356	0.973152	0.999957	down	no	172.87	93.37	245.35	0	61.73	551.47
osa-miR169g	93.3667	92.6333	0.0113749	0.976969	1	up	no	0	280.1	0	80.91	123.46	73.53
ptc-miR169w	93.3667	92.6333	0.0113749	0.976969	1	up	no	0	280.1	0	80.91	123.46	73.53
gma-miR5780d	28.81	30.8667	-0.0994467	0.981438	1	down	no	86.43	0	0	0	92.6	0
gma-miR396h	252703	299543	-0.245317	0.99424	0.999957	down	no	251869	309323	196918	363931	325360	209338
sbi-miR396b	252869	299543	-0.24437	0.996738	0.999957	down	no	251999	309323	197286	363931	325360	209338
ath-miR393a-5p	495.15	604.377	-0.287577	0.997204	0.999957	down	no	432.17	513.51	539.77	809.09	709.92	294.12
csi-miR393a	495.15	604.377	-0.287577	0.997204	0.999957	down	no	432.17	513.51	539.77	809.09	709.92	294.12
gma-miR396e	252775	299180	-0.24316	0.999957	0.999957	down	no	252042	308996	197286	363850	324866	208824
aly-miR162a-5p	0	0	0	1	1	no change	no	0	0	0	0	0	0
aly-miR165a-5p	0	0	0	1	1	no change	no	0	0	0	0	0	0
aly-miR165b-5p	0	0	0	1	1	no change	no	0	0	0	0	0	0
aof-miR169a	0	0	0	1	1	no change	no	0	0	0	0	0	0
ata-miR166c-5p	0	0	0	1	1	no change	no	0	0	0	0	0	0
ata-miR169j-5p	0	0	0	1	1	no change	no	0	0	0	0	0	0
ata-miR395b-3p	0	0	0	1	1	no change	no	0	0	0	0	0	0
ath-miR165a-5p	0	0	0	1	1	no change	no	0	0	0	0	0	0
bdi-miR169k-5p	0	0	0	1	1	no change	no	0	0	0	0	0	0
bdi-miR7713-5p	0	0	0	1	1	no change	no	0	0	0	0	0	0
bdi-miR9485	0	0	0	1	1	no change	no	0	0	0	0	0	0
bra-miR9568-5p	0	0	0	1	1	no change	no	0	0	0	0	0	0
csi-miR166c-5p	0	0	0	1	1	no change	no	0	0	0	0	0	0
csi-miR166f-5p	0	0	0	1	1	no change	no	0	0	0	0	0	0
gma-miR10426	0	0	0	1	1	no change	no	0	0	0	0	0	0
gma-miR167k	0	0	0	1	1	no change	no	0	0	0	0	0	0
gma-miR5375	0	0	0	1	1	no change	no	0	0	0	0	0	0
mdm-miR11007	0	0	0	1	1	no change	no	0	0	0	0	0	0
mdm-miR3627b	0	0	0	1	1	no change	no	0	0	0	0	0	0
mdm-miR477a	0	0	0	1	1	no change	no	0	0	0	0	0	0
mtr-miR5209	0	0	0	1	1	no change	no	0	0	0	0	0	0
osa-miR169r-5p	0	0	0	1	1	no change	no	0	0	0	0	0	0
ptc-miR6470	0	0	0	1	1	no change	no	0	0	0	0	0	0
seu-miR11045	0	0	0	1	1	no change	no	0	0	0	0	0	0
stu-miR172c-5p	0	0	0	1	1	no change	no	0	0	0	0	0	0
stu-miR319a-5p	0	0	0	1	1	no change	no	0	0	0	0	0	0
stu-miR3627-5p	0	0	0	1	1	no change	no	0	0	0	0	0	0
vvi-miR477b-5p	0	0	0	1	1	no change	no	0	0	0	0	0	0
