# Supplementary material for: Analyzing the defense response mechanism of Atractylodes macrocephala to Fusarium oxysporum through small RNA and degradome sequencing
Source: Front Plant Sci. 2024 Jul 22;15:1415209. doi: 10.3389/fpls.2024.1415209 (PMC11298489; doi:10.3389/fpls.2024.1415209)
Supplement: Supplementary file 9 [file Table_6.xlsx]

## Sheet: Sheet1
Table S6 Overview of reads from raw data to mapping sequences
Sample	long789(number)	long789(ratio)	short456(number)	short456(ratio)
Raw Reads	19465190	/	22769548	/
Unique Raw Reads	1399525	/	1996635	/
reads < 15nt after removing 3 adaptor	244601	1.26%	699642	3.07%
Mappable Reads	19220589	98.74%	22069906	96.93%
Unique reads < 15nt after removing 3 adaptor	35192	2.51%	139122	6.97%
Unique Mappable Reads	1364333	97.49%	1857513	93.03%
Mapped Reads	5704143	29.30%	5815924	25.54%
Unique Mapped Reads	329472	23.54%	367430	18.40%
Number of input Transcript	712687	/	712687	/
Number of Coverd Transcript	85353	11.98%	83583	11.73%
