# Supplementary material for: Analyzing the defense response mechanism of Atractylodes macrocephala to Fusarium oxysporum through small RNA and degradome sequencing
Source: Front Plant Sci. 2024 Jul 22;15:1415209. doi: 10.3389/fpls.2024.1415209 (PMC11298489; doi:10.3389/fpls.2024.1415209)
Supplement: Supplementary file 10 [file Table_7.xlsx]

## Sheet: Sheet1
Table S7 Results for miRNAs and target genes
SmallRNA	Transcript	Gene ID	Symbol	Description	GO	KEGG	TStart	TStop	TSlice	MFEratio	AllenScore	Sequence	DegradomeRawReads(long789)	DegradomeNormReads(long789)	DegradomeCategory(long789)	DegradomePval(long789)	Tplot_file_path(long789)	DegradomeRawReads(short456)	DegradomeNormReads(short456)	DegradomeCategory(short456)	DegradomePval(short456)	Tplot_file_path(short456)	long789	short456	log2(fold_change)	regulation	pvalue	qvalue
ahy-miR156a	TRINITY_DN12296_c1_g1_i2	TRINITY_DN12296_c1_g1	NA	NA	NA	NA	142	162	152	0.668449	6	UUGCUCUCUCUCUCUCUCUCU&UGACAGA-AGAGAGAGAGCAC	0	0	NA	NA	NA	1	38.0243	4	0.440135	Output/short456/cleaveLand_result/t_plot/ahy-miR156a_TRINITY_DN12296_c1_g1_i2_152_TPlot.pdf	0	38.0243	-Inf	down	6.9845e-10	7.47646e-10
ahy-miR156a	TRINITY_DN17771_c0_g1_i1	TRINITY_DN17771_c0_g1	NA	NA	NA	NA	13	32	23	1	0	GUGCUCUCUCUCUUCUGUCA&UGACAGAAGAGAGAGAGCAC	3	194.313	3	0.009036	Output/long789/cleaveLand_result/t_plot/ahy-miR156a_TRINITY_DN17771_c0_g1_i1_23_TPlot.pdf	0	0	NA	NA	NA	194.313	0	Inf	up	3.6042e-44	8.09893e-44
ahy-miR156a	TRINITY_DN6217_c0_g1_i3	TRINITY_DN6217_c0_g1	NA	NA	NA	NA	274	293	284	0.914439	3	GUGCUCUCUCUCCUCUGUCG&UGACAGAAGAGAGAGAGCAC	4	259.084	3	0.0108334	Output/long789/cleaveLand_result/t_plot/ahy-miR156a_TRINITY_DN6217_c0_g1_i3_284_TPlot.pdf	1	38.0243	4	0.00711619	Output/short456/cleaveLand_result/t_plot/ahy-miR156a_TRINITY_DN6217_c0_g1_i3_284_TPlot.pdf	259.084	38.0243	2.76843	up	1.1756e-37	2.42901e-37
ahy-miR156a	TRINITY_DN6217_c0_g1_i7	TRINITY_DN6217_c0_g1	NA	NA	NA	NA	274	293	284	0.914439	3	GUGCUCUCUCUCCUCUGUCG&UGACAGAAGAGAGAGAGCAC	1	64.771	4	0.00647944	Output/long789/cleaveLand_result/t_plot/ahy-miR156a_TRINITY_DN6217_c0_g1_i7_284_TPlot.pdf	1	38.0243	4	0.00790374	Output/short456/cleaveLand_result/t_plot/ahy-miR156a_TRINITY_DN6217_c0_g1_i7_284_TPlot.pdf	64.771	38.0243	0.768429	up	0.0083365	0.00847593
ahy-miR156a	TRINITY_DN6217_c0_g1_i8	TRINITY_DN6217_c0_g1	NA	NA	NA	NA	274	293	284	0.914439	3	GUGCUCUCUCUCCUCUGUCG&UGACAGAAGAGAGAGAGCAC	3	194.313	3	0.0114318	Output/long789/cleaveLand_result/t_plot/ahy-miR156a_TRINITY_DN6217_c0_g1_i8_284_TPlot.pdf	1	38.0243	4	0.00751004	Output/short456/cleaveLand_result/t_plot/ahy-miR156a_TRINITY_DN6217_c0_g1_i8_284_TPlot.pdf	194.313	38.0243	2.35339	up	1.1354e-24	1.84702e-24
ahy-miR156a	TRINITY_DN87_c0_g2_i1	TRINITY_DN87_c0_g2	NA	NA	GO:0006351|transcription, DNA-templated;GO:0006952|defense response;GO:0005634|nucleus;GO:0003700|DNA-binding transcription factor activity;GO:0043565|sequence-specific DNA binding	ko04075	1258	1278	1269	0.652406	5	CCUCUCUUCUUUCUUCUGUCA&UGACAGAAGAGAGA-GAGCAC	3	194.313	3	0.687287	Output/long789/cleaveLand_result/t_plot/ahy-miR156a_TRINITY_DN87_c0_g2_i1_1269_TPlot.pdf	0	0	NA	NA	NA	194.313	0	Inf	up	3.6042e-44	8.09893e-44
ahy-miR156a	TRINITY_DN87_c0_g2_i6	TRINITY_DN87_c0_g2	NA	NA	GO:0006351|transcription, DNA-templated;GO:0006952|defense response;GO:0005634|nucleus;GO:0003700|DNA-binding transcription factor activity;GO:0043565|sequence-specific DNA binding	ko04075	978	998	989	0.652406	5	CCUCUCUUCUUUCUUCUGUCA&UGACAGAAGAGAGA-GAGCAC	5	323.855	3	0.700982	Output/long789/cleaveLand_result/t_plot/ahy-miR156a_TRINITY_DN87_c0_g2_i6_989_TPlot.pdf	0	0	NA	NA	NA	323.855	0	Inf	up	2.0406e-72	7.88259e-72
ahy-miR156a	TRINITY_DN9504_c0_g1_i1	TRINITY_DN9504_c0_g1	NA	NA	GO:0005886|plasma membrane;GO:0016021|integral component of membrane;GO:0005524|ATP binding;GO:0106310|protein serine kinase activity;GO:0106311|protein threonine kinase activity	NA	1947	1966	1957	1	0	GUGCUCUCUCUCUUCUGUCA&UGACAGAAGAGAGAGAGCAC	1	64.771	4	0.00389272	Output/long789/cleaveLand_result/t_plot/ahy-miR156a_TRINITY_DN9504_c0_g1_i1_1957_TPlot.pdf	0	0	NA	NA	NA	64.771	0	Inf	up	8.4037e-16	1.0516e-15
ahy-miR156a	TRINITY_DN9504_c0_g1_i11	TRINITY_DN9504_c0_g1	NA	NA	GO:0005886|plasma membrane;GO:0016021|integral component of membrane;GO:0005524|ATP binding;GO:0106310|protein serine kinase activity;GO:0106311|protein threonine kinase activity	NA	1730	1749	1740	1	0	GUGCUCUCUCUCUUCUGUCA&UGACAGAAGAGAGAGAGCAC	3	194.313	3	0.00603311	Output/long789/cleaveLand_result/t_plot/ahy-miR156a_TRINITY_DN9504_c0_g1_i11_1740_TPlot.pdf	0	0	NA	NA	NA	194.313	0	Inf	up	3.6042e-44	8.09893e-44
ahy-miR156a	TRINITY_DN9504_c0_g1_i6	TRINITY_DN9504_c0_g1	NA	NA	GO:0005886|plasma membrane;GO:0016021|integral component of membrane;GO:0005524|ATP binding;GO:0106310|protein serine kinase activity;GO:0106311|protein threonine kinase activity	NA	814	833	824	1	0	GUGCUCUCUCUCUUCUGUCA&UGACAGAAGAGAGAGAGCAC	3	194.313	3	0.000604955	Output/long789/cleaveLand_result/t_plot/ahy-miR156a_TRINITY_DN9504_c0_g1_i6_824_TPlot.pdf	0	0	NA	NA	NA	194.313	0	Inf	up	3.6042e-44	8.09893e-44
aly-miR156g-5p	TRINITY_DN17771_c0_g1_i1	TRINITY_DN17771_c0_g1	NA	NA	NA	NA	13	32	23	0.894737	2	GUGCUCUCUCUCUUCUGUCA&CGACAGAAGAGAGUGAGCAC	3	194.313	3	0.016206	Output/long789/cleaveLand_result/t_plot/aly-miR156g-5p_TRINITY_DN17771_c0_g1_i1_23_TPlot.pdf	0	0	NA	NA	NA	194.313	0	Inf	up	3.6042e-44	8.09893e-44
aly-miR156g-5p	TRINITY_DN6217_c0_g1_i3	TRINITY_DN6217_c0_g1	NA	NA	NA	NA	274	293	284	0.836842	3	GUGCUCUCUCUCCUCUGUCG&CGACAGAAGAGAGUGAGCAC	4	259.084	3	0.0227329	Output/long789/cleaveLand_result/t_plot/aly-miR156g-5p_TRINITY_DN6217_c0_g1_i3_284_TPlot.pdf	1	38.0243	4	0.0149637	Output/short456/cleaveLand_result/t_plot/aly-miR156g-5p_TRINITY_DN6217_c0_g1_i3_284_TPlot.pdf	259.084	38.0243	2.76843	up	1.1756e-37	2.42901e-37
aly-miR156g-5p	TRINITY_DN6217_c0_g1_i7	TRINITY_DN6217_c0_g1	NA	NA	NA	NA	274	293	284	0.836842	3	GUGCUCUCUCUCCUCUGUCG&CGACAGAAGAGAGUGAGCAC	1	64.771	4	0.0132377	Output/long789/cleaveLand_result/t_plot/aly-miR156g-5p_TRINITY_DN6217_c0_g1_i7_284_TPlot.pdf	1	38.0243	4	0.0161354	Output/short456/cleaveLand_result/t_plot/aly-miR156g-5p_TRINITY_DN6217_c0_g1_i7_284_TPlot.pdf	64.771	38.0243	0.768429	up	0.0083365	0.00847593
aly-miR156g-5p	TRINITY_DN6217_c0_g1_i8	TRINITY_DN6217_c0_g1	NA	NA	NA	NA	274	293	284	0.836842	3	GUGCUCUCUCUCCUCUGUCG&CGACAGAAGAGAGUGAGCAC	3	194.313	3	0.0239149	Output/long789/cleaveLand_result/t_plot/aly-miR156g-5p_TRINITY_DN6217_c0_g1_i8_284_TPlot.pdf	1	38.0243	4	0.015745	Output/short456/cleaveLand_result/t_plot/aly-miR156g-5p_TRINITY_DN6217_c0_g1_i8_284_TPlot.pdf	194.313	38.0243	2.35339	up	1.1354e-24	1.84702e-24
aly-miR156g-5p	TRINITY_DN9504_c0_g1_i1	TRINITY_DN9504_c0_g1	NA	NA	GO:0005886|plasma membrane;GO:0016021|integral component of membrane;GO:0005524|ATP binding;GO:0106310|protein serine kinase activity;GO:0106311|protein threonine kinase activity	NA	1947	1966	1957	0.894737	2	GUGCUCUCUCUCUUCUGUCA&CGACAGAAGAGAGUGAGCAC	1	64.771	4	0.00841508	Output/long789/cleaveLand_result/t_plot/aly-miR156g-5p_TRINITY_DN9504_c0_g1_i1_1957_TPlot.pdf	0	0	NA	NA	NA	64.771	0	Inf	up	8.4037e-16	1.0516e-15
aly-miR156g-5p	TRINITY_DN9504_c0_g1_i11	TRINITY_DN9504_c0_g1	NA	NA	GO:0005886|plasma membrane;GO:0016021|integral component of membrane;GO:0005524|ATP binding;GO:0106310|protein serine kinase activity;GO:0106311|protein threonine kinase activity	NA	1730	1749	1740	0.894737	2	GUGCUCUCUCUCUUCUGUCA&CGACAGAAGAGAGUGAGCAC	3	194.313	3	0.0150146	Output/long789/cleaveLand_result/t_plot/aly-miR156g-5p_TRINITY_DN9504_c0_g1_i11_1740_TPlot.pdf	0	0	NA	NA	NA	194.313	0	Inf	up	3.6042e-44	8.09893e-44
aly-miR156g-5p	TRINITY_DN9504_c0_g1_i6	TRINITY_DN9504_c0_g1	NA	NA	GO:0005886|plasma membrane;GO:0016021|integral component of membrane;GO:0005524|ATP binding;GO:0106310|protein serine kinase activity;GO:0106311|protein threonine kinase activity	NA	814	833	824	0.894737	2	GUGCUCUCUCUCUUCUGUCA&CGACAGAAGAGAGUGAGCAC	3	194.313	3	0.0132248	Output/long789/cleaveLand_result/t_plot/aly-miR156g-5p_TRINITY_DN9504_c0_g1_i6_824_TPlot.pdf	0	0	NA	NA	NA	194.313	0	Inf	up	3.6042e-44	8.09893e-44
aly-miR159b-5p	TRINITY_DN2947_c2_g1_i12	TRINITY_DN2947_c2_g1	NA	NA	GO:0006412|translation;GO:0005840|ribosome;GO:0003735|structural constituent of ribosome	ko03010	591	610	602	0.663073	6.5	ACAGAGAGCUUCGAGGA-CUC&GAGCUCCUUGAAGUUCAAUGG	6	388.626	3	0.30783	Output/long789/cleaveLand_result/t_plot/aly-miR159b-5p_TRINITY_DN2947_c2_g1_i12_602_TPlot.pdf	0	0	NA	NA	NA	388.626	0	Inf	up	1.5868e-86	7.5422e-86
aly-miR159b-5p	TRINITY_DN6509_c0_g3_i1	TRINITY_DN6509_c0_g3	NA	NA	GO:0006952|defense response;GO:0006972|hyperosmotic response;GO:0006979|response to oxidative stress;GO:0009409|response to cold;GO:0009414|response to water deprivation;GO:0005576|extracellular region;GO:0005783|endoplasmic reticulum;GO:0005829|cytosol;GO:0004869|cysteine-type endopeptidase inhibitor activity;GO:0050897|cobalt ion binding	NA	405	428	419	0.654987	6.5	CCGUGGAUGAACUUCAAGGAACUG&GAGCUCCUUGAAGUUCA---AUGG	0	0	NA	NA	NA	11	418.267	2	0.252857	Output/short456/cleaveLand_result/t_plot/aly-miR159b-5p_TRINITY_DN6509_c0_g3_i1_419_TPlot.pdf	0	418.267	-Inf	down	0	0
aly-miR159b-5p	TRINITY_DN6509_c0_g3_i2	TRINITY_DN6509_c0_g3	NA	NA	GO:0006952|defense response;GO:0006972|hyperosmotic response;GO:0006979|response to oxidative stress;GO:0009409|response to cold;GO:0009414|response to water deprivation;GO:0005576|extracellular region;GO:0005783|endoplasmic reticulum;GO:0005829|cytosol;GO:0004869|cysteine-type endopeptidase inhibitor activity;GO:0050897|cobalt ion binding	NA	405	428	419	0.654987	6.5	CCGUGGAUGAACUUCAAGGAACUG&GAGCUCCUUGAAGUUCA---AUGG	0	0	NA	NA	NA	11	418.267	2	0.255179	Output/short456/cleaveLand_result/t_plot/aly-miR159b-5p_TRINITY_DN6509_c0_g3_i2_419_TPlot.pdf	0	418.267	-Inf	down	0	0
aly-miR159b-5p	TRINITY_DN6509_c0_g3_i3	TRINITY_DN6509_c0_g3	NA	NA	GO:0006952|defense response;GO:0006972|hyperosmotic response;GO:0006979|response to oxidative stress;GO:0009409|response to cold;GO:0009414|response to water deprivation;GO:0005576|extracellular region;GO:0005783|endoplasmic reticulum;GO:0005829|cytosol;GO:0004869|cysteine-type endopeptidase inhibitor activity;GO:0050897|cobalt ion binding	NA	405	428	419	0.654987	6.5	CCGUGGAUGAACUUCAAGGAACUG&GAGCUCCUUGAAGUUCA---AUGG	0	0	NA	NA	NA	9	342.218	2	0.255469	Output/short456/cleaveLand_result/t_plot/aly-miR159b-5p_TRINITY_DN6509_c0_g3_i3_419_TPlot.pdf	0	342.218	-Inf	down	2.0371e-76	8.65019e-76
aly-miR159b-5p	TRINITY_DN6509_c0_g3_i4	TRINITY_DN6509_c0_g3	NA	NA	GO:0006952|defense response;GO:0006972|hyperosmotic response;GO:0006979|response to oxidative stress;GO:0009409|response to cold;GO:0009414|response to water deprivation;GO:0005576|extracellular region;GO:0005783|endoplasmic reticulum;GO:0005829|cytosol;GO:0004869|cysteine-type endopeptidase inhibitor activity;GO:0050897|cobalt ion binding	NA	405	428	419	0.654987	6.5	CCGUGGAUGAACUUCAAGGAACUG&GAGCUCCUUGAAGUUCA---AUGG	0	0	NA	NA	NA	10	380.243	2	0.254019	Output/short456/cleaveLand_result/t_plot/aly-miR159b-5p_TRINITY_DN6509_c0_g3_i4_419_TPlot.pdf	0	380.243	-Inf	down	1.0627e-84	4.7946e-84
aly-miR159b-5p	TRINITY_DN6519_c0_g2_i1	TRINITY_DN6519_c0_g2	NA	NA	GO:0006412|translation;GO:0005840|ribosome;GO:0003735|structural constituent of ribosome	ko03010	496	515	507	0.663073	6.5	ACAGAGAGCUUCGAGGA-CUC&GAGCUCCUUGAAGUUCAAUGG	5	323.855	3	0.303207	Output/long789/cleaveLand_result/t_plot/aly-miR159b-5p_TRINITY_DN6519_c0_g2_i1_507_TPlot.pdf	0	0	NA	NA	NA	323.855	0	Inf	up	2.0406e-72	7.88259e-72
aly-miR165a-5p	TRINITY_DN46323_c0_g1_i1	TRINITY_DN46323_c0_g1	NA	NA	GO:0006355|regulation of transcription, DNA-templated;GO:0010200|response to chitin;GO:0010929|positive regulation of auxin mediated signaling pathway;GO:0019760|glucosinolate metabolic process;GO:1901001|negative regulation of response to salt stress;GO:0005634|nucleus;GO:0000976|transcription regulatory region sequence-specific DNA binding;GO:0000978|RNA polymerase II cis-regulatory region sequ…	NA	729	748	739	0.670391	5.5	GUGCGAUUCAGGCAACAUUA&GAAUGUUGUCUGGAUCGAGG	0	0	NA	NA	NA	21	798.509	2	0.252857	Output/short456/cleaveLand_result/t_plot/aly-miR165a-5p_TRINITY_DN46323_c0_g1_i1_739_TPlot.pdf	0	798.509	-Inf	down	0	0
aly-miR165a-5p	TRINITY_DN46323_c0_g1_i2	TRINITY_DN46323_c0_g1	NA	NA	GO:0006355|regulation of transcription, DNA-templated;GO:0010200|response to chitin;GO:0010929|positive regulation of auxin mediated signaling pathway;GO:0019760|glucosinolate metabolic process;GO:1901001|negative regulation of response to salt stress;GO:0005634|nucleus;GO:0000976|transcription regulatory region sequence-specific DNA binding;GO:0000978|RNA polymerase II cis-regulatory region sequ…	NA	729	748	739	0.670391	5.5	GUGCGAUUCAGGCAACAUUA&GAAUGUUGUCUGGAUCGAGG	0	0	NA	NA	NA	9	342.218	2	0.251984	Output/short456/cleaveLand_result/t_plot/aly-miR165a-5p_TRINITY_DN46323_c0_g1_i2_739_TPlot.pdf	0	342.218	-Inf	down	2.0371e-76	8.65019e-76
aly-miR165b-5p	TRINITY_DN26905_c0_g1_i2	TRINITY_DN26905_c0_g1	NA	NA	NA	NA	143	161	153	0.719033	3	CCUGGAUCCAAA-AACAUUC&GAAUGUUGUUUGGAUCGAGG	3	194.313	3	0.20639	Output/long789/cleaveLand_result/t_plot/aly-miR165b-5p_TRINITY_DN26905_c0_g1_i2_153_TPlot.pdf	0	0	NA	NA	NA	194.313	0	Inf	up	3.6042e-44	8.09893e-44
aly-miR165b-5p	TRINITY_DN4757_c0_g2_i3	TRINITY_DN4757_c0_g2	NA	NA	GO:0010193|response to ozone;GO:0046777|protein autophosphorylation;GO:0072593|reactive oxygen species metabolic process;GO:0005886|plasma membrane;GO:0009506|plasmodesma;GO:0016021|integral component of membrane;GO:0004674|protein serine/threonine kinase activity;GO:0005524|ATP binding;GO:0016301|kinase activity	NA	261	282	271	0.667674	7	CCUUGAUCCAAACUUAAUGUUU&GAAUGUU--GUUUGGAUCGAGG	0	0	NA	NA	NA	3	114.073	3	0.509199	Output/short456/cleaveLand_result/t_plot/aly-miR165b-5p_TRINITY_DN4757_c0_g2_i3_271_TPlot.pdf	0	114.073	-Inf	down	1.252e-26	2.10489e-26
aly-miR166g-5p	TRINITY_DN279_c1_g1_i1	TRINITY_DN279_c1_g1	NA	NA	GO:0006457|protein folding;GO:0009408|response to heat;GO:0034605|cellular response to heat;GO:0045087|innate immune response;GO:0050821|protein stabilization;GO:0051131|chaperone-mediated protein complex assembly;GO:0071277|cellular response to calcium ion;GO:0005730|nucleolus;GO:0005737|cytoplasm;GO:0005794|Golgi apparatus;GO:0005829|cytosol;GO:0005886|plasma membrane;GO:0009536|plastid;GO:0009…	NA	185	207	199	0.692708	7	CCUUGACGAGCCAAAC-ACGUUCG&GGAAUGUUGUUUGGCUCG---AGG	0	0	NA	NA	NA	2	76.0485	3	0.201313	Output/short456/cleaveLand_result/t_plot/aly-miR166g-5p_TRINITY_DN279_c1_g1_i1_199_TPlot.pdf	0	76.0485	-Inf	down	2.7637e-18	4.06116e-18
aly-miR166g-5p	TRINITY_DN279_c1_g1_i11	TRINITY_DN279_c1_g1	NA	NA	GO:0006457|protein folding;GO:0009408|response to heat;GO:0034605|cellular response to heat;GO:0045087|innate immune response;GO:0050821|protein stabilization;GO:0051131|chaperone-mediated protein complex assembly;GO:0071277|cellular response to calcium ion;GO:0005730|nucleolus;GO:0005737|cytoplasm;GO:0005794|Golgi apparatus;GO:0005829|cytosol;GO:0005886|plasma membrane;GO:0009536|plastid;GO:0009…	NA	185	207	199	0.692708	7	CCUUGACGAGCCAAAC-ACGUUCG&GGAAUGUUGUUUGGCUCG---AGG	1	64.771	4	0.112445	Output/long789/cleaveLand_result/t_plot/aly-miR166g-5p_TRINITY_DN279_c1_g1_i11_199_TPlot.pdf	1	38.0243	4	0.135505	Output/short456/cleaveLand_result/t_plot/aly-miR166g-5p_TRINITY_DN279_c1_g1_i11_199_TPlot.pdf	64.771	38.0243	0.768429	up	0.0083365	0.00847593
aly-miR166g-5p	TRINITY_DN279_c1_g1_i4	TRINITY_DN279_c1_g1	NA	NA	GO:0006457|protein folding;GO:0009408|response to heat;GO:0034605|cellular response to heat;GO:0045087|innate immune response;GO:0050821|protein stabilization;GO:0051131|chaperone-mediated protein complex assembly;GO:0071277|cellular response to calcium ion;GO:0005730|nucleolus;GO:0005737|cytoplasm;GO:0005794|Golgi apparatus;GO:0005829|cytosol;GO:0005886|plasma membrane;GO:0009536|plastid;GO:0009…	NA	185	207	199	0.692708	7	CCUUGACGAGCCAAAC-ACGUUCG&GGAAUGUUGUUUGGCUCG---AGG	0	0	NA	NA	NA	1	38.0243	4	0.133788	Output/short456/cleaveLand_result/t_plot/aly-miR166g-5p_TRINITY_DN279_c1_g1_i4_199_TPlot.pdf	0	38.0243	-Inf	down	6.9845e-10	7.47646e-10
aly-miR166g-5p	TRINITY_DN279_c1_g1_i8	TRINITY_DN279_c1_g1	NA	NA	GO:0006457|protein folding;GO:0009408|response to heat;GO:0034605|cellular response to heat;GO:0045087|innate immune response;GO:0050821|protein stabilization;GO:0051131|chaperone-mediated protein complex assembly;GO:0071277|cellular response to calcium ion;GO:0005730|nucleolus;GO:0005737|cytoplasm;GO:0005794|Golgi apparatus;GO:0005829|cytosol;GO:0005886|plasma membrane;GO:0009536|plastid;GO:0009…	NA	185	207	199	0.692708	7	CCUUGACGAGCCAAAC-ACGUUCG&GGAAUGUUGUUUGGCUCG---AGG	0	0	NA	NA	NA	4	152.097	3	0.212362	Output/short456/cleaveLand_result/t_plot/aly-miR166g-5p_TRINITY_DN279_c1_g1_i8_199_TPlot.pdf	0	152.097	-Inf	down	5.9991e-35	1.17839e-34
aly-miR166g-5p	TRINITY_DN279_c1_g1_i9	TRINITY_DN279_c1_g1	NA	NA	GO:0006457|protein folding;GO:0009408|response to heat;GO:0034605|cellular response to heat;GO:0045087|innate immune response;GO:0050821|protein stabilization;GO:0051131|chaperone-mediated protein complex assembly;GO:0071277|cellular response to calcium ion;GO:0005730|nucleolus;GO:0005737|cytoplasm;GO:0005794|Golgi apparatus;GO:0005829|cytosol;GO:0005886|plasma membrane;GO:0009536|plastid;GO:0009…	NA	185	207	199	0.692708	7	CCUUGACGAGCCAAAC-ACGUUCG&GGAAUGUUGUUUGGCUCG---AGG	0	0	NA	NA	NA	4	152.097	3	0.200301	Output/short456/cleaveLand_result/t_plot/aly-miR166g-5p_TRINITY_DN279_c1_g1_i9_199_TPlot.pdf	0	152.097	-Inf	down	5.9991e-35	1.17839e-34
aly-miR166g-5p	TRINITY_DN60803_c0_g1_i1	TRINITY_DN60803_c0_g1	NA	NA	GO:0006914|autophagy;GO:0015031|protein transport;GO:0051258|protein polymerization;GO:0005737|cytoplasm;GO:0005773|vacuole;GO:0008270|zinc ion binding;GO:0043130|ubiquitin binding	NA	1121	1141	1132	0.833333	6	CCUCGAGCCAGAUGAUUUUCC&GGAAUGUUGUUUGGCUCGAGG	0	0	NA	NA	NA	1	38.0243	4	0.00198182	Output/short456/cleaveLand_result/t_plot/aly-miR166g-5p_TRINITY_DN60803_c0_g1_i1_1132_TPlot.pdf	0	38.0243	-Inf	down	6.9845e-10	7.47646e-10
aof-miR160b	TRINITY_DN73089_c0_g1_i1	TRINITY_DN73089_c0_g1	NA	NA	GO:0006355|regulation of transcription, DNA-templated;GO:0009734|auxin-activated signaling pathway;GO:0005634|nucleus;GO:0003677|DNA binding	NA	1587	1607	1598	0.813953	4	AAGCAUCCAGGGAGCCAGGCA&UGCCUGGUUCCCUGUAUGCCA	2	129.542	0	0.00238209	Output/long789/cleaveLand_result/t_plot/aof-miR160b_TRINITY_DN73089_c0_g1_i1_1598_TPlot.pdf	0	0	NA	NA	NA	129.542	0	Inf	up	5.1393e-30	9.14621e-30
aof-miR160b	TRINITY_DN73089_c0_g1_i2	TRINITY_DN73089_c0_g1	NA	NA	GO:0006355|regulation of transcription, DNA-templated;GO:0009734|auxin-activated signaling pathway;GO:0005634|nucleus;GO:0003677|DNA binding	NA	1587	1607	1598	0.813953	4	AAGCAUCCAGGGAGCCAGGCA&UGCCUGGUUCCCUGUAUGCCA	1	64.771	4	0.0100252	Output/long789/cleaveLand_result/t_plot/aof-miR160b_TRINITY_DN73089_c0_g1_i2_1598_TPlot.pdf	0	0	NA	NA	NA	64.771	0	Inf	up	8.4037e-16	1.0516e-15
aof-miR160b	TRINITY_DN7361_c0_g1_i13	TRINITY_DN7361_c0_g1	NA	NA	GO:0006355|regulation of transcription, DNA-templated;GO:0009734|auxin-activated signaling pathway;GO:0005634|nucleus;GO:0003677|DNA binding	NA	564	585	576	0.813953	4	CGAGCAUUCAGGGAGCCAGGCA&UGCCUGGUUCCCUGUAUGC-CA	0	0	NA	NA	NA	1	38.0243	4	0.0102627	Output/short456/cleaveLand_result/t_plot/aof-miR160b_TRINITY_DN7361_c0_g1_i13_576_TPlot.pdf	0	38.0243	-Inf	down	6.9845e-10	7.47646e-10
aof-miR160b	TRINITY_DN7361_c0_g1_i7	TRINITY_DN7361_c0_g1	NA	NA	GO:0006355|regulation of transcription, DNA-templated;GO:0009734|auxin-activated signaling pathway;GO:0005634|nucleus;GO:0003677|DNA binding	NA	1646	1667	1658	0.813953	4	CGAGCAUUCAGGGAGCCAGGCA&UGCCUGGUUCCCUGUAUGC-CA	0	0	NA	NA	NA	1	38.0243	4	0.01144	Output/short456/cleaveLand_result/t_plot/aof-miR160b_TRINITY_DN7361_c0_g1_i7_1658_TPlot.pdf	0	38.0243	-Inf	down	6.9845e-10	7.47646e-10
aof-miR160b	TRINITY_DN7361_c0_g1_i9	TRINITY_DN7361_c0_g1	NA	NA	GO:0006355|regulation of transcription, DNA-templated;GO:0009734|auxin-activated signaling pathway;GO:0005634|nucleus;GO:0003677|DNA binding	NA	1646	1667	1658	0.813953	4	CGAGCAUUCAGGGAGCCAGGCA&UGCCUGGUUCCCUGUAUGC-CA	0	0	NA	NA	NA	1	38.0243	4	0.00947698	Output/short456/cleaveLand_result/t_plot/aof-miR160b_TRINITY_DN7361_c0_g1_i9_1658_TPlot.pdf	0	38.0243	-Inf	down	6.9845e-10	7.47646e-10
aof-miR168b	TRINITY_DN2253_c0_g1_i11	TRINITY_DN2253_c0_g1	NA	NA	GO:0030001|metal ion transport;GO:0005507|copper ion binding	NA	430	449	441	0.671806	6.5	GACCCGGCGAGCAUCAAG-GA&UCGCUUGGUGCAGGUCGGGUC	0	0	NA	NA	NA	1	38.0243	4	0.206191	Output/short456/cleaveLand_result/t_plot/aof-miR168b_TRINITY_DN2253_c0_g1_i11_441_TPlot.pdf	0	38.0243	-Inf	down	6.9845e-10	7.47646e-10
aof-miR168b	TRINITY_DN2253_c0_g1_i12	TRINITY_DN2253_c0_g1	NA	NA	GO:0009910|negative regulation of flower development;GO:0030001|metal ion transport;GO:0005634|nucleus;GO:0005730|nucleolus;GO:0005737|cytoplasm;GO:0008270|zinc ion binding	NA	216	235	227	0.671806	6.5	GACCCGGCGAGCAUCAAG-GA&UCGCUUGGUGCAGGUCGGGUC	0	0	NA	NA	NA	5	190.121	2	0.20825	Output/short456/cleaveLand_result/t_plot/aof-miR168b_TRINITY_DN2253_c0_g1_i12_227_TPlot.pdf	0	190.121	-Inf	down	2.9642e-43	6.43543e-43
aof-miR168b	TRINITY_DN2253_c0_g1_i17	TRINITY_DN2253_c0_g1	NA	NA	GO:0030001|metal ion transport;GO:0005507|copper ion binding	NA	314	333	325	0.671806	6.5	GACCCGGCGAGCAUCAAG-GA&UCGCUUGGUGCAGGUCGGGUC	0	0	NA	NA	NA	1	38.0243	4	0.216206	Output/short456/cleaveLand_result/t_plot/aof-miR168b_TRINITY_DN2253_c0_g1_i17_325_TPlot.pdf	0	38.0243	-Inf	down	6.9845e-10	7.47646e-10
aof-miR168b	TRINITY_DN2253_c0_g1_i21	TRINITY_DN2253_c0_g1	NA	NA	GO:0009910|negative regulation of flower development;GO:0030001|metal ion transport;GO:0005634|nucleus;GO:0005730|nucleolus;GO:0005737|cytoplasm;GO:0008270|zinc ion binding	NA	216	235	227	0.671806	6.5	GACCCGGCGAGCAUCAAG-GA&UCGCUUGGUGCAGGUCGGGUC	0	0	NA	NA	NA	3	114.073	2	0.205781	Output/short456/cleaveLand_result/t_plot/aof-miR168b_TRINITY_DN2253_c0_g1_i21_227_TPlot.pdf	0	114.073	-Inf	down	1.252e-26	2.10489e-26
aof-miR168b	TRINITY_DN2253_c0_g1_i27	TRINITY_DN2253_c0_g1	NA	NA	GO:0009910|negative regulation of flower development;GO:0030001|metal ion transport;GO:0005634|nucleus;GO:0005730|nucleolus;GO:0005737|cytoplasm;GO:0008270|zinc ion binding	NA	216	235	227	0.671806	6.5	GACCCGGCGAGCAUCAAG-GA&UCGCUUGGUGCAGGUCGGGUC	0	0	NA	NA	NA	2	76.0485	3	0.324262	Output/short456/cleaveLand_result/t_plot/aof-miR168b_TRINITY_DN2253_c0_g1_i27_227_TPlot.pdf	0	76.0485	-Inf	down	2.7637e-18	4.06116e-18
aof-miR168b	TRINITY_DN2253_c0_g1_i30	TRINITY_DN2253_c0_g1	NA	NA	GO:0030001|metal ion transport;GO:0005507|copper ion binding	NA	216	235	227	0.671806	6.5	GACCCGGCGAGCAUCAAG-GA&UCGCUUGGUGCAGGUCGGGUC	0	0	NA	NA	NA	5	190.121	2	0.207017	Output/short456/cleaveLand_result/t_plot/aof-miR168b_TRINITY_DN2253_c0_g1_i30_227_TPlot.pdf	0	190.121	-Inf	down	2.9642e-43	6.43543e-43
aof-miR168b	TRINITY_DN2253_c0_g1_i47	TRINITY_DN2253_c0_g1	NA	NA	GO:0030001|metal ion transport;GO:0005507|copper ion binding	NA	430	449	441	0.671806	6.5	GACCCGGCGAGCAUCAAG-GA&UCGCUUGGUGCAGGUCGGGUC	0	0	NA	NA	NA	3	114.073	2	0.202374	Output/short456/cleaveLand_result/t_plot/aof-miR168b_TRINITY_DN2253_c0_g1_i47_441_TPlot.pdf	0	114.073	-Inf	down	1.252e-26	2.10489e-26
aof-miR168b	TRINITY_DN2253_c0_g1_i50	TRINITY_DN2253_c0_g1	NA	NA	GO:0030001|metal ion transport;GO:0005507|copper ion binding	NA	314	333	325	0.671806	6.5	GACCCGGCGAGCAUCAAG-GA&UCGCUUGGUGCAGGUCGGGUC	0	0	NA	NA	NA	3	114.073	2	0.202064	Output/short456/cleaveLand_result/t_plot/aof-miR168b_TRINITY_DN2253_c0_g1_i50_325_TPlot.pdf	0	114.073	-Inf	down	1.252e-26	2.10489e-26
aof-miR168b	TRINITY_DN2253_c0_g1_i7	TRINITY_DN2253_c0_g1	NA	NA	GO:0030001|metal ion transport;GO:0005507|copper ion binding	NA	332	351	343	0.671806	6.5	GACCCGGCGAGCAUCAAG-GA&UCGCUUGGUGCAGGUCGGGUC	0	0	NA	NA	NA	2	76.0485	3	0.30912	Output/short456/cleaveLand_result/t_plot/aof-miR168b_TRINITY_DN2253_c0_g1_i7_343_TPlot.pdf	0	76.0485	-Inf	down	2.7637e-18	4.06116e-18
aof-miR168b	TRINITY_DN2640_c1_g1_i1	TRINITY_DN2640_c1_g1	NA	NA	GO:0006417|regulation of translation;GO:0009616|RNAi-mediated antiviral immune response;GO:0009733|response to auxin;GO:0009850|auxin metabolic process;GO:0009955|adaxial/abaxial pattern specification;GO:0009965|leaf morphogenesis;GO:0010218|response to far red light;GO:0010305|leaf vascular tissue pattern formation;GO:0010589|leaf proximal/distal pattern formation;GO:0016032|viral process;GO:001…	NA	638	658	649	0.76652	6	UCCCCGAGCUGCACCAAGCUA&UCGCUUGGUGCAGGUCGGGUC	3	194.313	3	0.0495613	Output/long789/cleaveLand_result/t_plot/aof-miR168b_TRINITY_DN2640_c1_g1_i1_649_TPlot.pdf	0	0	NA	NA	NA	194.313	0	Inf	up	3.6042e-44	8.09893e-44
aof-miR168b	TRINITY_DN2640_c1_g1_i2	TRINITY_DN2640_c1_g1	NA	NA	GO:0006417|regulation of translation;GO:0009616|RNAi-mediated antiviral immune response;GO:0009733|response to auxin;GO:0009850|auxin metabolic process;GO:0009955|adaxial/abaxial pattern specification;GO:0009965|leaf morphogenesis;GO:0010218|response to far red light;GO:0010305|leaf vascular tissue pattern formation;GO:0010589|leaf proximal/distal pattern formation;GO:0016032|viral process;GO:001…	NA	638	658	649	0.76652	6	UCCCCGAGCUGCACCAAGCUA&UCGCUUGGUGCAGGUCGGGUC	3	194.313	3	0.048986	Output/long789/cleaveLand_result/t_plot/aof-miR168b_TRINITY_DN2640_c1_g1_i2_649_TPlot.pdf	0	0	NA	NA	NA	194.313	0	Inf	up	3.6042e-44	8.09893e-44
aof-miR168b	TRINITY_DN5396_c0_g1_i12	TRINITY_DN5396_c0_g1	NA	NA	NA	NA	2030	2050	2041	0.726872	7	UUUACGACCUGCACCAAGCAU&UCGCUUGGUGCAGGUCGGGUC	0	0	NA	NA	NA	2	76.0485	3	0.108285	Output/short456/cleaveLand_result/t_plot/aof-miR168b_TRINITY_DN5396_c0_g1_i12_2041_TPlot.pdf	0	76.0485	-Inf	down	2.7637e-18	4.06116e-18
aof-miR168b	TRINITY_DN5396_c0_g1_i9	TRINITY_DN5396_c0_g1	NA	NA	NA	NA	1730	1750	1741	0.726872	7	UUUACGACCUGCACCAAGCAU&UCGCUUGGUGCAGGUCGGGUC	0	0	NA	NA	NA	2	76.0485	3	0.10659	Output/short456/cleaveLand_result/t_plot/aof-miR168b_TRINITY_DN5396_c0_g1_i9_1741_TPlot.pdf	0	76.0485	-Inf	down	2.7637e-18	4.06116e-18
aof-miR393a	TRINITY_DN112_c0_g1_i15	TRINITY_DN112_c0_g1	NA	NA	GO:0006952|defense response;GO:0007049|cell cycle;GO:0009733|response to auxin;GO:0009734|auxin-activated signaling pathway;GO:0009873|ethylene-activated signaling pathway;GO:0010152|pollen maturation;GO:0010311|lateral root formation;GO:0016036|cellular response to phosphate starvation;GO:0031146|SCF-dependent proteasomal ubiquitin-dependent protein catabolic process;GO:0048443|stamen developmen…	ko04075	1730	1751	1742	0.947917	2.5	GAGUCAAUGCGAUCCCUAUGGA&UCCAAAGGGAUCGCAUUGAUUC	30	1943.13	2	0.00140152	Output/long789/cleaveLand_result/t_plot/aof-miR393a_TRINITY_DN112_c0_g1_i15_1742_TPlot.pdf	13	494.315	2	0.00155552	Output/short456/cleaveLand_result/t_plot/aof-miR393a_TRINITY_DN112_c0_g1_i15_1742_TPlot.pdf	1943.13	494.315	1.97488	up	0	0
aof-miR393a	TRINITY_DN112_c0_g1_i25	TRINITY_DN112_c0_g1	NA	NA	GO:0006952|defense response;GO:0007049|cell cycle;GO:0009733|response to auxin;GO:0009734|auxin-activated signaling pathway;GO:0009873|ethylene-activated signaling pathway;GO:0010152|pollen maturation;GO:0010311|lateral root formation;GO:0016036|cellular response to phosphate starvation;GO:0031146|SCF-dependent proteasomal ubiquitin-dependent protein catabolic process;GO:0048443|stamen developmen…	ko04075	1825	1846	1837	0.947917	2.5	GAGUCAAUGCGAUCCCUAUGGA&UCCAAAGGGAUCGCAUUGAUUC	20	1295.42	2	0.000701004	Output/long789/cleaveLand_result/t_plot/aof-miR393a_TRINITY_DN112_c0_g1_i25_1837_TPlot.pdf	12	456.291	2	0.000778064	Output/short456/cleaveLand_result/t_plot/aof-miR393a_TRINITY_DN112_c0_g1_i25_1837_TPlot.pdf	1295.42	456.291	1.50539	up	0	0
aof-miR393a	TRINITY_DN112_c0_g1_i6	TRINITY_DN112_c0_g1	NA	NA	GO:0006952|defense response;GO:0007049|cell cycle;GO:0009733|response to auxin;GO:0009734|auxin-activated signaling pathway;GO:0009873|ethylene-activated signaling pathway;GO:0010152|pollen maturation;GO:0010311|lateral root formation;GO:0016036|cellular response to phosphate starvation;GO:0031146|SCF-dependent proteasomal ubiquitin-dependent protein catabolic process;GO:0048443|stamen developmen…	ko04075	1916	1937	1928	0.947917	2.5	GAGUCAAUGCGAUCCCUAUGGA&UCCAAAGGGAUCGCAUUGAUUC	32	2072.67	0	0.000286151	Output/long789/cleaveLand_result/t_plot/aof-miR393a_TRINITY_DN112_c0_g1_i6_1928_TPlot.pdf	5	190.121	3	0.0018978	Output/short456/cleaveLand_result/t_plot/aof-miR393a_TRINITY_DN112_c0_g1_i6_1928_TPlot.pdf	2072.67	190.121	3.4465	up	0	0
aof-miR393a	TRINITY_DN2176_c1_g1_i1	TRINITY_DN2176_c1_g1	NA	NA	GO:0006952|defense response;GO:0007049|cell cycle;GO:0009733|response to auxin;GO:0009734|auxin-activated signaling pathway;GO:0009873|ethylene-activated signaling pathway;GO:0010152|pollen maturation;GO:0010311|lateral root formation;GO:0016036|cellular response to phosphate starvation;GO:0031146|SCF-dependent proteasomal ubiquitin-dependent protein catabolic process;GO:0048443|stamen developmen…	ko04075	1772	1793	1784	0.893229	1.5	GAGACAAUGCGAUCCCUUUGGA&UCCAAAGGGAUCGCAUUGAUUC	0	0	NA	NA	NA	6	228.146	3	0.00316099	Output/short456/cleaveLand_result/t_plot/aof-miR393a_TRINITY_DN2176_c1_g1_i1_1784_TPlot.pdf	0	228.146	-Inf	down	1.4931e-51	4.44467e-51
aof-miR393a	TRINITY_DN2176_c1_g1_i2	TRINITY_DN2176_c1_g1	NA	NA	GO:0006952|defense response;GO:0007049|cell cycle;GO:0009733|response to auxin;GO:0009734|auxin-activated signaling pathway;GO:0009873|ethylene-activated signaling pathway;GO:0010152|pollen maturation;GO:0010311|lateral root formation;GO:0016036|cellular response to phosphate starvation;GO:0031146|SCF-dependent proteasomal ubiquitin-dependent protein catabolic process;GO:0048443|stamen developmen…	ko04075	1772	1793	1784	0.893229	1.5	GAGACAAUGCGAUCCCUUUGGA&UCCAAAGGGAUCGCAUUGAUUC	0	0	NA	NA	NA	3	114.073	0	0.000669207	Output/short456/cleaveLand_result/t_plot/aof-miR393a_TRINITY_DN2176_c1_g1_i2_1784_TPlot.pdf	0	114.073	-Inf	down	1.252e-26	2.10489e-26
aof-miR393a	TRINITY_DN2176_c1_g2_i2	TRINITY_DN2176_c1_g2	NA	NA	GO:0006952|defense response;GO:0007049|cell cycle;GO:0009733|response to auxin;GO:0009734|auxin-activated signaling pathway;GO:0009873|ethylene-activated signaling pathway;GO:0010152|pollen maturation;GO:0010311|lateral root formation;GO:0016036|cellular response to phosphate starvation;GO:0031146|SCF-dependent proteasomal ubiquitin-dependent protein catabolic process;GO:0048443|stamen developmen…	ko04075	1795	1816	1807	0.893229	1.5	GAGACAAUGCGAUCCCUUUGGA&UCCAAAGGGAUCGCAUUGAUUC	27	1748.82	3	0.00482941	Output/long789/cleaveLand_result/t_plot/aof-miR393a_TRINITY_DN2176_c1_g2_i2_1807_TPlot.pdf	0	0	NA	NA	NA	1748.82	0	Inf	up	0	0
aof-miR395a	TRINITY_DN79_c0_g1_i3	TRINITY_DN79_c0_g1	NA	NA	NA	NA	979	1000	991	0.674541	6.5	AGGGUUCUCCUCAAACAGCUCA&UGAAGUGUUUGGGG-GAACUCU	2	129.542	3	0.230974	Output/long789/cleaveLand_result/t_plot/aof-miR395a_TRINITY_DN79_c0_g1_i3_991_TPlot.pdf	0	0	NA	NA	NA	129.542	0	Inf	up	5.1393e-30	9.14621e-30
aof-miR395a	TRINITY_DN79_c0_g1_i6	TRINITY_DN79_c0_g1	NA	NA	NA	NA	996	1017	1008	0.674541	6.5	AGGGUUCUCCUCAAACAGCUCA&UGAAGUGUUUGGGG-GAACUCU	5	323.855	3	0.236076	Output/long789/cleaveLand_result/t_plot/aof-miR395a_TRINITY_DN79_c0_g1_i6_1008_TPlot.pdf	0	0	NA	NA	NA	323.855	0	Inf	up	2.0406e-72	7.88259e-72
aqc-miR156a	TRINITY_DN17771_c0_g1_i1	TRINITY_DN17771_c0_g1	NA	NA	NA	NA	13	32	23	0.932011	2	GUGCUCUCUCUCUUCUGUCA&UGACAGAAGAUAGAGAGCAC	3	194.313	3	0.00422701	Output/long789/cleaveLand_result/t_plot/aqc-miR156a_TRINITY_DN17771_c0_g1_i1_23_TPlot.pdf	0	0	NA	NA	NA	194.313	0	Inf	up	3.6042e-44	8.09893e-44
aqc-miR156a	TRINITY_DN6217_c0_g1_i3	TRINITY_DN6217_c0_g1	NA	NA	NA	NA	274	293	284	0.787535	5	GUGCUCUCUCUCCUCUGUCG&UGACAGAAGAUAGAGAGCAC	4	259.084	3	0.03332	Output/long789/cleaveLand_result/t_plot/aqc-miR156a_TRINITY_DN6217_c0_g1_i3_284_TPlot.pdf	1	38.0243	4	0.0219734	Output/short456/cleaveLand_result/t_plot/aqc-miR156a_TRINITY_DN6217_c0_g1_i3_284_TPlot.pdf	259.084	38.0243	2.76843	up	1.1756e-37	2.42901e-37
aqc-miR156a	TRINITY_DN6217_c0_g1_i7	TRINITY_DN6217_c0_g1	NA	NA	NA	NA	274	293	284	0.787535	5	GUGCUCUCUCUCCUCUGUCG&UGACAGAAGAUAGAGAGCAC	1	64.771	4	0.0173983	Output/long789/cleaveLand_result/t_plot/aqc-miR156a_TRINITY_DN6217_c0_g1_i7_284_TPlot.pdf	1	38.0243	4	0.021197	Output/short456/cleaveLand_result/t_plot/aqc-miR156a_TRINITY_DN6217_c0_g1_i7_284_TPlot.pdf	64.771	38.0243	0.768429	up	0.0083365	0.00847593
aqc-miR156a	TRINITY_DN6217_c0_g1_i8	TRINITY_DN6217_c0_g1	NA	NA	NA	NA	274	293	284	0.787535	5	GUGCUCUCUCUCCUCUGUCG&UGACAGAAGAUAGAGAGCAC	3	194.313	3	0.0315635	Output/long789/cleaveLand_result/t_plot/aqc-miR156a_TRINITY_DN6217_c0_g1_i8_284_TPlot.pdf	1	38.0243	4	0.0208086	Output/short456/cleaveLand_result/t_plot/aqc-miR156a_TRINITY_DN6217_c0_g1_i8_284_TPlot.pdf	194.313	38.0243	2.35339	up	1.1354e-24	1.84702e-24
aqc-miR156a	TRINITY_DN9504_c0_g1_i1	TRINITY_DN9504_c0_g1	NA	NA	GO:0005886|plasma membrane;GO:0016021|integral component of membrane;GO:0005524|ATP binding;GO:0106310|protein serine kinase activity;GO:0106311|protein threonine kinase activity	NA	1947	1966	1957	0.932011	2	GUGCUCUCUCUCUUCUGUCA&UGACAGAAGAUAGAGAGCAC	1	64.771	4	0.00162381	Output/long789/cleaveLand_result/t_plot/aqc-miR156a_TRINITY_DN9504_c0_g1_i1_1957_TPlot.pdf	0	0	NA	NA	NA	64.771	0	Inf	up	8.4037e-16	1.0516e-15
aqc-miR156a	TRINITY_DN9504_c0_g1_i11	TRINITY_DN9504_c0_g1	NA	NA	GO:0005886|plasma membrane;GO:0016021|integral component of membrane;GO:0005524|ATP binding;GO:0106310|protein serine kinase activity;GO:0106311|protein threonine kinase activity	NA	1730	1749	1740	0.932011	2	GUGCUCUCUCUCUUCUGUCA&UGACAGAAGAUAGAGAGCAC	3	194.313	3	0.00362425	Output/long789/cleaveLand_result/t_plot/aqc-miR156a_TRINITY_DN9504_c0_g1_i11_1740_TPlot.pdf	0	0	NA	NA	NA	194.313	0	Inf	up	3.6042e-44	8.09893e-44
aqc-miR156a	TRINITY_DN9504_c0_g1_i6	TRINITY_DN9504_c0_g1	NA	NA	GO:0005886|plasma membrane;GO:0016021|integral component of membrane;GO:0005524|ATP binding;GO:0106310|protein serine kinase activity;GO:0106311|protein threonine kinase activity	NA	814	833	824	0.932011	2	GUGCUCUCUCUCUUCUGUCA&UGACAGAAGAUAGAGAGCAC	3	194.313	3	0.00120954	Output/long789/cleaveLand_result/t_plot/aqc-miR156a_TRINITY_DN9504_c0_g1_i6_824_TPlot.pdf	0	0	NA	NA	NA	194.313	0	Inf	up	3.6042e-44	8.09893e-44
ata-miR166c-5p	TRINITY_DN3443_c1_g1_i10	TRINITY_DN3443_c1_g1	NA	NA	NA	NA	479	499	490	0.800448	7	CCGCGAGCCGGCCAGCGUCAC&GGAACGUUGGCUGGCUCGAGG	33	2137.44	0	0.00333334	Output/long789/cleaveLand_result/t_plot/ata-miR166c-5p_TRINITY_DN3443_c1_g1_i10_490_TPlot.pdf	41	1558.99	3	0.0219182	Output/short456/cleaveLand_result/t_plot/ata-miR166c-5p_TRINITY_DN3443_c1_g1_i10_490_TPlot.pdf	2137.44	1558.99	0.455271	up	1.6819e-21	2.68314e-21
ata-miR393-5p	TRINITY_DN112_c0_g1_i15	TRINITY_DN112_c0_g1	NA	NA	GO:0006952|defense response;GO:0007049|cell cycle;GO:0009733|response to auxin;GO:0009734|auxin-activated signaling pathway;GO:0009873|ethylene-activated signaling pathway;GO:0010152|pollen maturation;GO:0010311|lateral root formation;GO:0016036|cellular response to phosphate starvation;GO:0031146|SCF-dependent proteasomal ubiquitin-dependent protein catabolic process;GO:0048443|stamen developmen…	ko04075	1732	1752	1743	0.912921	3.5	GUCAAUGCGAUCCCUAUGGAU&UUCCAAAGGGAUCGCAUUGAU	8	518.168	2	0.00245136	Output/long789/cleaveLand_result/t_plot/ata-miR393-5p_TRINITY_DN112_c0_g1_i15_1743_TPlot.pdf	7	266.17	2	0.00272057	Output/short456/cleaveLand_result/t_plot/ata-miR393-5p_TRINITY_DN112_c0_g1_i15_1743_TPlot.pdf	518.168	266.17	0.961074	up	2.2619e-19	3.59353e-19
ata-miR393-5p	TRINITY_DN112_c0_g1_i25	TRINITY_DN112_c0_g1	NA	NA	GO:0006952|defense response;GO:0007049|cell cycle;GO:0009733|response to auxin;GO:0009734|auxin-activated signaling pathway;GO:0009873|ethylene-activated signaling pathway;GO:0010152|pollen maturation;GO:0010311|lateral root formation;GO:0016036|cellular response to phosphate starvation;GO:0031146|SCF-dependent proteasomal ubiquitin-dependent protein catabolic process;GO:0048443|stamen developmen…	ko04075	1827	1847	1838	0.912921	3.5	GUCAAUGCGAUCCCUAUGGAU&UUCCAAAGGGAUCGCAUUGAU	4	259.084	3	0.00362425	Output/long789/cleaveLand_result/t_plot/ata-miR393-5p_TRINITY_DN112_c0_g1_i25_1838_TPlot.pdf	1	38.0243	4	0.00237771	Output/short456/cleaveLand_result/t_plot/ata-miR393-5p_TRINITY_DN112_c0_g1_i25_1838_TPlot.pdf	259.084	38.0243	2.76843	up	1.1756e-37	2.42901e-37
ata-miR393-5p	TRINITY_DN112_c0_g1_i6	TRINITY_DN112_c0_g1	NA	NA	GO:0006952|defense response;GO:0007049|cell cycle;GO:0009733|response to auxin;GO:0009734|auxin-activated signaling pathway;GO:0009873|ethylene-activated signaling pathway;GO:0010152|pollen maturation;GO:0010311|lateral root formation;GO:0016036|cellular response to phosphate starvation;GO:0031146|SCF-dependent proteasomal ubiquitin-dependent protein catabolic process;GO:0048443|stamen developmen…	ko04075	1918	1938	1929	0.912921	3.5	GUCAAUGCGAUCCCUAUGGAU&UUCCAAAGGGAUCGCAUUGAU	4	259.084	3	0.00482941	Output/long789/cleaveLand_result/t_plot/ata-miR393-5p_TRINITY_DN112_c0_g1_i6_1929_TPlot.pdf	2	76.0485	3	0.00505279	Output/short456/cleaveLand_result/t_plot/ata-miR393-5p_TRINITY_DN112_c0_g1_i6_1929_TPlot.pdf	259.084	76.0485	1.76843	up	1.5369e-23	2.45521e-23
ath-miR156c-5p	TRINITY_DN174703_c0_g1_i2	TRINITY_DN174703_c0_g1	NA	NA	NA	NA	465	485	476	0.666667	5	UUGCCAAACUCUCUUCUGUUA&UGACAGAAGAGAGU-GAGCAC	3	194.313	3	0.341737	Output/long789/cleaveLand_result/t_plot/ath-miR156c-5p_TRINITY_DN174703_c0_g1_i2_476_TPlot.pdf	0	0	NA	NA	NA	194.313	0	Inf	up	3.6042e-44	8.09893e-44
ath-miR156c-5p	TRINITY_DN17771_c0_g1_i1	TRINITY_DN17771_c0_g1	NA	NA	NA	NA	13	32	23	0.938172	1	GUGCUCUCUCUCUUCUGUCA&UGACAGAAGAGAGUGAGCAC	3	194.313	3	0.0150146	Output/long789/cleaveLand_result/t_plot/ath-miR156c-5p_TRINITY_DN17771_c0_g1_i1_23_TPlot.pdf	0	0	NA	NA	NA	194.313	0	Inf	up	3.6042e-44	8.09893e-44
ath-miR156c-5p	TRINITY_DN6217_c0_g1_i3	TRINITY_DN6217_c0_g1	NA	NA	NA	NA	274	293	284	0.801075	4	GUGCUCUCUCUCCUCUGUCG&UGACAGAAGAGAGUGAGCAC	4	259.084	3	0.0298038	Output/long789/cleaveLand_result/t_plot/ath-miR156c-5p_TRINITY_DN6217_c0_g1_i3_284_TPlot.pdf	1	38.0243	4	0.0196424	Output/short456/cleaveLand_result/t_plot/ath-miR156c-5p_TRINITY_DN6217_c0_g1_i3_284_TPlot.pdf	259.084	38.0243	2.76843	up	1.1756e-37	2.42901e-37
ath-miR156c-5p	TRINITY_DN6217_c0_g1_i7	TRINITY_DN6217_c0_g1	NA	NA	NA	NA	274	293	284	0.801075	4	GUGCUCUCUCUCCUCUGUCG&UGACAGAAGAGAGUGAGCAC	1	64.771	4	0.0158001	Output/long789/cleaveLand_result/t_plot/ath-miR156c-5p_TRINITY_DN6217_c0_g1_i7_284_TPlot.pdf	1	38.0243	4	0.0192533	Output/short456/cleaveLand_result/t_plot/ath-miR156c-5p_TRINITY_DN6217_c0_g1_i7_284_TPlot.pdf	64.771	38.0243	0.768429	up	0.0083365	0.00847593
ath-miR156c-5p	TRINITY_DN6217_c0_g1_i8	TRINITY_DN6217_c0_g1	NA	NA	NA	NA	274	293	284	0.801075	4	GUGCUCUCUCUCCUCUGUCG&UGACAGAAGAGAGUGAGCAC	3	194.313	3	0.0309773	Output/long789/cleaveLand_result/t_plot/ath-miR156c-5p_TRINITY_DN6217_c0_g1_i8_284_TPlot.pdf	1	38.0243	4	0.02042	Output/short456/cleaveLand_result/t_plot/ath-miR156c-5p_TRINITY_DN6217_c0_g1_i8_284_TPlot.pdf	194.313	38.0243	2.35339	up	1.1354e-24	1.84702e-24
ath-miR156c-5p	TRINITY_DN66807_c0_g1_i2	TRINITY_DN66807_c0_g1	NA	NA	GO:0009651|response to salt stress;GO:0010182|sugar mediated signaling pathway;GO:0005634|nucleus;GO:0005739|mitochondrion;GO:0004672|protein kinase activity;GO:0004712|protein serine/threonine/tyrosine kinase activity;GO:0005524|ATP binding;GO:0106310|protein serine kinase activity;GO:0106311|protein threonine kinase activity	NA	2385	2405	2395	0.663978	5	AUGUUUACUCUUUUGCUGUCA&UGACAG-AAGAGAGUGAGCAC	5	323.855	3	0.352013	Output/long789/cleaveLand_result/t_plot/ath-miR156c-5p_TRINITY_DN66807_c0_g1_i2_2395_TPlot.pdf	0	0	NA	NA	NA	323.855	0	Inf	up	2.0406e-72	7.88259e-72
ath-miR156c-5p	TRINITY_DN9504_c0_g1_i1	TRINITY_DN9504_c0_g1	NA	NA	GO:0005886|plasma membrane;GO:0016021|integral component of membrane;GO:0005524|ATP binding;GO:0106310|protein serine kinase activity;GO:0106311|protein threonine kinase activity	NA	1947	1966	1957	0.938172	1	GUGCUCUCUCUCUUCUGUCA&UGACAGAAGAGAGUGAGCAC	1	64.771	4	0.00744773	Output/long789/cleaveLand_result/t_plot/ath-miR156c-5p_TRINITY_DN9504_c0_g1_i1_1957_TPlot.pdf	0	0	NA	NA	NA	64.771	0	Inf	up	8.4037e-16	1.0516e-15
ath-miR156c-5p	TRINITY_DN9504_c0_g1_i11	TRINITY_DN9504_c0_g1	NA	NA	GO:0005886|plasma membrane;GO:0016021|integral component of membrane;GO:0005524|ATP binding;GO:0106310|protein serine kinase activity;GO:0106311|protein threonine kinase activity	NA	1730	1749	1740	0.938172	1	GUGCUCUCUCUCUUCUGUCA&UGACAGAAGAGAGUGAGCAC	3	194.313	3	0.0144184	Output/long789/cleaveLand_result/t_plot/ath-miR156c-5p_TRINITY_DN9504_c0_g1_i11_1740_TPlot.pdf	0	0	NA	NA	NA	194.313	0	Inf	up	3.6042e-44	8.09893e-44
ath-miR156c-5p	TRINITY_DN9504_c0_g1_i6	TRINITY_DN9504_c0_g1	NA	NA	GO:0005886|plasma membrane;GO:0016021|integral component of membrane;GO:0005524|ATP binding;GO:0106310|protein serine kinase activity;GO:0106311|protein threonine kinase activity	NA	814	833	824	0.938172	1	GUGCUCUCUCUCUUCUGUCA&UGACAGAAGAGAGUGAGCAC	3	194.313	3	0.0126275	Output/long789/cleaveLand_result/t_plot/ath-miR156c-5p_TRINITY_DN9504_c0_g1_i6_824_TPlot.pdf	0	0	NA	NA	NA	194.313	0	Inf	up	3.6042e-44	8.09893e-44
ath-miR156h	TRINITY_DN17771_c0_g1_i1	TRINITY_DN17771_c0_g1	NA	NA	NA	NA	13	32	23	0.948127	2	GUGCUCUCUCUCUUCUGUCA&UGACAGAAGAAAGAGAGCAC	3	194.313	3	0.00362425	Output/long789/cleaveLand_result/t_plot/ath-miR156h_TRINITY_DN17771_c0_g1_i1_23_TPlot.pdf	0	0	NA	NA	NA	194.313	0	Inf	up	3.6042e-44	8.09893e-44
ath-miR156h	TRINITY_DN6217_c0_g1_i3	TRINITY_DN6217_c0_g1	NA	NA	NA	NA	274	293	284	0.801153	5	GUGCUCUCUCUCCUCUGUCG&UGACAGAAGAAAGAGAGCAC	4	259.084	3	0.0256853	Output/long789/cleaveLand_result/t_plot/ath-miR156h_TRINITY_DN6217_c0_g1_i3_284_TPlot.pdf	1	38.0243	4	0.0169159	Output/short456/cleaveLand_result/t_plot/ath-miR156h_TRINITY_DN6217_c0_g1_i3_284_TPlot.pdf	259.084	38.0243	2.76843	up	1.1756e-37	2.42901e-37
ath-miR156h	TRINITY_DN6217_c0_g1_i7	TRINITY_DN6217_c0_g1	NA	NA	NA	NA	274	293	284	0.801153	5	GUGCUCUCUCUCCUCUGUCG&UGACAGAAGAAAGAGAGCAC	1	64.771	4	0.0135584	Output/long789/cleaveLand_result/t_plot/ath-miR156h_TRINITY_DN6217_c0_g1_i7_284_TPlot.pdf	1	38.0243	4	0.0165257	Output/short456/cleaveLand_result/t_plot/ath-miR156h_TRINITY_DN6217_c0_g1_i7_284_TPlot.pdf	64.771	38.0243	0.768429	up	0.0083365	0.00847593
ath-miR156h	TRINITY_DN6217_c0_g1_i8	TRINITY_DN6217_c0_g1	NA	NA	NA	NA	274	293	284	0.801153	5	GUGCUCUCUCUCCUCUGUCG&UGACAGAAGAAAGAGAGCAC	3	194.313	3	0.0286288	Output/long789/cleaveLand_result/t_plot/ath-miR156h_TRINITY_DN6217_c0_g1_i8_284_TPlot.pdf	1	38.0243	4	0.0188641	Output/short456/cleaveLand_result/t_plot/ath-miR156h_TRINITY_DN6217_c0_g1_i8_284_TPlot.pdf	194.313	38.0243	2.35339	up	1.1354e-24	1.84702e-24
ath-miR156h	TRINITY_DN87_c0_g2_i1	TRINITY_DN87_c0_g2	NA	NA	GO:0006351|transcription, DNA-templated;GO:0006952|defense response;GO:0005634|nucleus;GO:0003700|DNA-binding transcription factor activity;GO:0043565|sequence-specific DNA binding	ko04075	1258	1278	1269	0.700288	4	CCUCUCUUCUUUCUUCUGUCA&UGACAGAAGAAAGA-GAGCAC	3	194.313	3	0.19234	Output/long789/cleaveLand_result/t_plot/ath-miR156h_TRINITY_DN87_c0_g2_i1_1269_TPlot.pdf	0	0	NA	NA	NA	194.313	0	Inf	up	3.6042e-44	8.09893e-44
ath-miR156h	TRINITY_DN87_c0_g2_i6	TRINITY_DN87_c0_g2	NA	NA	GO:0006351|transcription, DNA-templated;GO:0006952|defense response;GO:0005634|nucleus;GO:0003700|DNA-binding transcription factor activity;GO:0043565|sequence-specific DNA binding	ko04075	978	998	989	0.700288	4	CCUCUCUUCUUUCUUCUGUCA&UGACAGAAGAAAGA-GAGCAC	5	323.855	3	0.189402	Output/long789/cleaveLand_result/t_plot/ath-miR156h_TRINITY_DN87_c0_g2_i6_989_TPlot.pdf	0	0	NA	NA	NA	323.855	0	Inf	up	2.0406e-72	7.88259e-72
ath-miR156h	TRINITY_DN9504_c0_g1_i1	TRINITY_DN9504_c0_g1	NA	NA	GO:0005886|plasma membrane;GO:0016021|integral component of membrane;GO:0005524|ATP binding;GO:0106310|protein serine kinase activity;GO:0106311|protein threonine kinase activity	NA	1947	1966	1957	0.948127	2	GUGCUCUCUCUCUUCUGUCA&UGACAGAAGAAAGAGAGCAC	1	64.771	4	0.00129926	Output/long789/cleaveLand_result/t_plot/ath-miR156h_TRINITY_DN9504_c0_g1_i1_1957_TPlot.pdf	0	0	NA	NA	NA	64.771	0	Inf	up	8.4037e-16	1.0516e-15
ath-miR156h	TRINITY_DN9504_c0_g1_i11	TRINITY_DN9504_c0_g1	NA	NA	GO:0005886|plasma membrane;GO:0016021|integral component of membrane;GO:0005524|ATP binding;GO:0106310|protein serine kinase activity;GO:0106311|protein threonine kinase activity	NA	1730	1749	1740	0.948127	2	GUGCUCUCUCUCUUCUGUCA&UGACAGAAGAAAGAGAGCAC	3	194.313	3	0.00302112	Output/long789/cleaveLand_result/t_plot/ath-miR156h_TRINITY_DN9504_c0_g1_i11_1740_TPlot.pdf	0	0	NA	NA	NA	194.313	0	Inf	up	3.6042e-44	8.09893e-44
ath-miR156h	TRINITY_DN9504_c0_g1_i6	TRINITY_DN9504_c0_g1	NA	NA	GO:0005886|plasma membrane;GO:0016021|integral component of membrane;GO:0005524|ATP binding;GO:0106310|protein serine kinase activity;GO:0106311|protein threonine kinase activity	NA	814	833	824	0.948127	2	GUGCUCUCUCUCUUCUGUCA&UGACAGAAGAAAGAGAGCAC	3	194.313	3	0.00120954	Output/long789/cleaveLand_result/t_plot/ath-miR156h_TRINITY_DN9504_c0_g1_i6_824_TPlot.pdf	0	0	NA	NA	NA	194.313	0	Inf	up	3.6042e-44	8.09893e-44
ath-miR156i	TRINITY_DN12296_c1_g1_i2	TRINITY_DN12296_c1_g1	NA	NA	NA	NA	142	162	152	0.686327	5.5	UUGCUCUCUCUCUCUCUCUCU&UGACAGA-AGAGAGAGAGCAG	0	0	NA	NA	NA	1	38.0243	4	0.405804	Output/short456/cleaveLand_result/t_plot/ath-miR156i_TRINITY_DN12296_c1_g1_i2_152_TPlot.pdf	0	38.0243	-Inf	down	6.9845e-10	7.47646e-10
ath-miR156i	TRINITY_DN17771_c0_g1_i1	TRINITY_DN17771_c0_g1	NA	NA	NA	NA	13	32	23	0.97319	1	GUGCUCUCUCUCUUCUGUCA&UGACAGAAGAGAGAGAGCAG	3	194.313	3	0.00543144	Output/long789/cleaveLand_result/t_plot/ath-miR156i_TRINITY_DN17771_c0_g1_i1_23_TPlot.pdf	0	0	NA	NA	NA	194.313	0	Inf	up	3.6042e-44	8.09893e-44
ath-miR156i	TRINITY_DN21459_c0_g1_i1	TRINITY_DN21459_c0_g1	NA	NA	NA	NA	71	91	81	0.670241	6	CUGCUCUCUUUCUCUCUCUCU&UGACAGA-AGAGAGAGAGCAG	1	64.771	4	0.469256	Output/long789/cleaveLand_result/t_plot/ath-miR156i_TRINITY_DN21459_c0_g1_i1_81_TPlot.pdf	0	0	NA	NA	NA	64.771	0	Inf	up	8.4037e-16	1.0516e-15
ath-miR156i	TRINITY_DN6217_c0_g1_i3	TRINITY_DN6217_c0_g1	NA	NA	NA	NA	274	293	284	0.836461	4	GUGCUCUCUCUCCUCUGUCG&UGACAGAAGAGAGAGAGCAG	4	259.084	3	0.0250955	Output/long789/cleaveLand_result/t_plot/ath-miR156i_TRINITY_DN6217_c0_g1_i3_284_TPlot.pdf	1	38.0243	4	0.0165257	Output/short456/cleaveLand_result/t_plot/ath-miR156i_TRINITY_DN6217_c0_g1_i3_284_TPlot.pdf	259.084	38.0243	2.76843	up	1.1756e-37	2.42901e-37
ath-miR156i	TRINITY_DN6217_c0_g1_i7	TRINITY_DN6217_c0_g1	NA	NA	NA	NA	274	293	284	0.836461	4	GUGCUCUCUCUCCUCUGUCG&UGACAGAAGAGAGAGAGCAG	1	64.771	4	0.0132377	Output/long789/cleaveLand_result/t_plot/ath-miR156i_TRINITY_DN6217_c0_g1_i7_284_TPlot.pdf	1	38.0243	4	0.0161354	Output/short456/cleaveLand_result/t_plot/ath-miR156i_TRINITY_DN6217_c0_g1_i7_284_TPlot.pdf	64.771	38.0243	0.768429	up	0.0083365	0.00847593
ath-miR156i	TRINITY_DN6217_c0_g1_i8	TRINITY_DN6217_c0_g1	NA	NA	NA	NA	274	293	284	0.836461	4	GUGCUCUCUCUCCUCUGUCG&UGACAGAAGAGAGAGAGCAG	3	194.313	3	0.0256853	Output/long789/cleaveLand_result/t_plot/ath-miR156i_TRINITY_DN6217_c0_g1_i8_284_TPlot.pdf	1	38.0243	4	0.0169159	Output/short456/cleaveLand_result/t_plot/ath-miR156i_TRINITY_DN6217_c0_g1_i8_284_TPlot.pdf	194.313	38.0243	2.35339	up	1.1354e-24	1.84702e-24
ath-miR156i	TRINITY_DN87_c0_g2_i1	TRINITY_DN87_c0_g2	NA	NA	GO:0006351|transcription, DNA-templated;GO:0006952|defense response;GO:0005634|nucleus;GO:0003700|DNA-binding transcription factor activity;GO:0043565|sequence-specific DNA binding	ko04075	1259	1278	1269	0.678284	3	CU-CUCUUCUUUCUUCUGUCA&UGACAGAAGAGAGA-GAGCAG	3	194.313	3	0.632006	Output/long789/cleaveLand_result/t_plot/ath-miR156i_TRINITY_DN87_c0_g2_i1_1269_TPlot.pdf	0	0	NA	NA	NA	194.313	0	Inf	up	3.6042e-44	8.09893e-44
ath-miR156i	TRINITY_DN87_c0_g2_i6	TRINITY_DN87_c0_g2	NA	NA	GO:0006351|transcription, DNA-templated;GO:0006952|defense response;GO:0005634|nucleus;GO:0003700|DNA-binding transcription factor activity;GO:0043565|sequence-specific DNA binding	ko04075	979	998	989	0.678284	3	CU-CUCUUCUUUCUUCUGUCA&UGACAGAAGAGAGA-GAGCAG	5	323.855	3	0.627976	Output/long789/cleaveLand_result/t_plot/ath-miR156i_TRINITY_DN87_c0_g2_i6_989_TPlot.pdf	0	0	NA	NA	NA	323.855	0	Inf	up	2.0406e-72	7.88259e-72
ath-miR156i	TRINITY_DN9504_c0_g1_i1	TRINITY_DN9504_c0_g1	NA	NA	GO:0005886|plasma membrane;GO:0016021|integral component of membrane;GO:0005524|ATP binding;GO:0106310|protein serine kinase activity;GO:0106311|protein threonine kinase activity	NA	1947	1966	1957	0.97319	1	GUGCUCUCUCUCUUCUGUCA&UGACAGAAGAGAGAGAGCAG	1	64.771	4	0.00162381	Output/long789/cleaveLand_result/t_plot/ath-miR156i_TRINITY_DN9504_c0_g1_i1_1957_TPlot.pdf	0	0	NA	NA	NA	64.771	0	Inf	up	8.4037e-16	1.0516e-15
ath-miR156i	TRINITY_DN9504_c0_g1_i11	TRINITY_DN9504_c0_g1	NA	NA	GO:0005886|plasma membrane;GO:0016021|integral component of membrane;GO:0005524|ATP binding;GO:0106310|protein serine kinase activity;GO:0106311|protein threonine kinase activity	NA	1730	1749	1740	0.97319	1	GUGCUCUCUCUCUUCUGUCA&UGACAGAAGAGAGAGAGCAG	3	194.313	3	0.00422701	Output/long789/cleaveLand_result/t_plot/ath-miR156i_TRINITY_DN9504_c0_g1_i11_1740_TPlot.pdf	0	0	NA	NA	NA	194.313	0	Inf	up	3.6042e-44	8.09893e-44
ath-miR156i	TRINITY_DN9504_c0_g1_i6	TRINITY_DN9504_c0_g1	NA	NA	GO:0005886|plasma membrane;GO:0016021|integral component of membrane;GO:0005524|ATP binding;GO:0106310|protein serine kinase activity;GO:0106311|protein threonine kinase activity	NA	814	833	824	0.97319	1	GUGCUCUCUCUCUUCUGUCA&UGACAGAAGAGAGAGAGCAG	3	194.313	3	0.00181377	Output/long789/cleaveLand_result/t_plot/ath-miR156i_TRINITY_DN9504_c0_g1_i6_824_TPlot.pdf	0	0	NA	NA	NA	194.313	0	Inf	up	3.6042e-44	8.09893e-44
ath-miR160a-5p	TRINITY_DN73089_c0_g1_i1	TRINITY_DN73089_c0_g1	NA	NA	GO:0006355|regulation of transcription, DNA-templated;GO:0009734|auxin-activated signaling pathway;GO:0005634|nucleus;GO:0003677|DNA binding	NA	1587	1607	1598	0.823789	3	AAGCAUCCAGGGAGCCAGGCA&UGCCUGGCUCCCUGUAUGCCA	2	129.542	0	0.00209654	Output/long789/cleaveLand_result/t_plot/ath-miR160a-5p_TRINITY_DN73089_c0_g1_i1_1598_TPlot.pdf	0	0	NA	NA	NA	129.542	0	Inf	up	5.1393e-30	9.14621e-30
ath-miR160a-5p	TRINITY_DN73089_c0_g1_i2	TRINITY_DN73089_c0_g1	NA	NA	GO:0006355|regulation of transcription, DNA-templated;GO:0009734|auxin-activated signaling pathway;GO:0005634|nucleus;GO:0003677|DNA binding	NA	1587	1607	1598	0.823789	3	AAGCAUCCAGGGAGCCAGGCA&UGCCUGGCUCCCUGUAUGCCA	1	64.771	4	0.00647944	Output/long789/cleaveLand_result/t_plot/ath-miR160a-5p_TRINITY_DN73089_c0_g1_i2_1598_TPlot.pdf	0	0	NA	NA	NA	64.771	0	Inf	up	8.4037e-16	1.0516e-15
ath-miR160a-5p	TRINITY_DN7361_c0_g1_i13	TRINITY_DN7361_c0_g1	NA	NA	GO:0006355|regulation of transcription, DNA-templated;GO:0009734|auxin-activated signaling pathway;GO:0005634|nucleus;GO:0003677|DNA binding	NA	564	585	576	0.823789	3	CGAGCAUUCAGGGAGCCAGGCA&UGCCUGGCUCCCUGUAUGC-CA	0	0	NA	NA	NA	1	38.0243	4	0.0090839	Output/short456/cleaveLand_result/t_plot/ath-miR160a-5p_TRINITY_DN7361_c0_g1_i13_576_TPlot.pdf	0	38.0243	-Inf	down	6.9845e-10	7.47646e-10
ath-miR160a-5p	TRINITY_DN7361_c0_g1_i7	TRINITY_DN7361_c0_g1	NA	NA	GO:0006355|regulation of transcription, DNA-templated;GO:0009734|auxin-activated signaling pathway;GO:0005634|nucleus;GO:0003677|DNA binding	NA	1646	1667	1658	0.823789	3	CGAGCAUUCAGGGAGCCAGGCA&UGCCUGGCUCCCUGUAUGC-CA	0	0	NA	NA	NA	1	38.0243	4	0.00711619	Output/short456/cleaveLand_result/t_plot/ath-miR160a-5p_TRINITY_DN7361_c0_g1_i7_1658_TPlot.pdf	0	38.0243	-Inf	down	6.9845e-10	7.47646e-10
ath-miR160a-5p	TRINITY_DN7361_c0_g1_i9	TRINITY_DN7361_c0_g1	NA	NA	GO:0006355|regulation of transcription, DNA-templated;GO:0009734|auxin-activated signaling pathway;GO:0005634|nucleus;GO:0003677|DNA binding	NA	1646	1667	1658	0.823789	3	CGAGCAUUCAGGGAGCCAGGCA&UGCCUGGCUCCCUGUAUGC-CA	0	0	NA	NA	NA	1	38.0243	4	0.00672218	Output/short456/cleaveLand_result/t_plot/ath-miR160a-5p_TRINITY_DN7361_c0_g1_i9_1658_TPlot.pdf	0	38.0243	-Inf	down	6.9845e-10	7.47646e-10
ath-miR164b-5p	TRINITY_DN3244_c1_g1_i15	TRINITY_DN3244_c1_g1	NA	NA	GO:2001142|nicotinate transport;GO:2001143|N-methylnicotinate transport;GO:0005886|plasma membrane;GO:0016021|integral component of membrane;GO:0005524|ATP binding;GO:0090416|nicotinate transmembrane transporter activity;GO:0090417|N-methylnicotinate transmembrane transporter activity	NA	2142	2162	2153	0.654628	5.5	UGUAUGUGUACUGCUUUUCCC&UGGAGAAGCAGGGCACGUGCA	0	0	NA	NA	NA	1	38.0243	4	0.262955	Output/short456/cleaveLand_result/t_plot/ath-miR164b-5p_TRINITY_DN3244_c1_g1_i15_2153_TPlot.pdf	0	38.0243	-Inf	down	6.9845e-10	7.47646e-10
ath-miR164b-5p	TRINITY_DN3244_c1_g1_i16	TRINITY_DN3244_c1_g1	NA	NA	GO:2001142|nicotinate transport;GO:2001143|N-methylnicotinate transport;GO:0005886|plasma membrane;GO:0016021|integral component of membrane;GO:0005524|ATP binding;GO:0090416|nicotinate transmembrane transporter activity;GO:0090417|N-methylnicotinate transmembrane transporter activity	NA	1798	1818	1809	0.654628	5.5	UGUAUGUGUACUGCUUUUCCC&UGGAGAAGCAGGGCACGUGCA	0	0	NA	NA	NA	3	114.073	1	0.0161978	Output/short456/cleaveLand_result/t_plot/ath-miR164b-5p_TRINITY_DN3244_c1_g1_i16_1809_TPlot.pdf	0	114.073	-Inf	down	1.252e-26	2.10489e-26
ath-miR164b-5p	TRINITY_DN3244_c1_g1_i21	TRINITY_DN3244_c1_g1	NA	NA	GO:2001142|nicotinate transport;GO:2001143|N-methylnicotinate transport;GO:0005886|plasma membrane;GO:0016021|integral component of membrane;GO:0005524|ATP binding;GO:0090416|nicotinate transmembrane transporter activity;GO:0090417|N-methylnicotinate transmembrane transporter activity	NA	1545	1565	1556	0.654628	5.5	UGUAUGUGUACUGCUUUUCCC&UGGAGAAGCAGGGCACGUGCA	0	0	NA	NA	NA	1	38.0243	4	0.266165	Output/short456/cleaveLand_result/t_plot/ath-miR164b-5p_TRINITY_DN3244_c1_g1_i21_1556_TPlot.pdf	0	38.0243	-Inf	down	6.9845e-10	7.47646e-10
ath-miR164b-5p	TRINITY_DN3244_c1_g1_i24	TRINITY_DN3244_c1_g1	NA	NA	GO:2001142|nicotinate transport;GO:2001143|N-methylnicotinate transport;GO:0005886|plasma membrane;GO:0016021|integral component of membrane;GO:0005524|ATP binding;GO:0090416|nicotinate transmembrane transporter activity;GO:0090417|N-methylnicotinate transmembrane transporter activity	NA	1763	1783	1774	0.654628	5.5	UGUAUGUGUACUGCUUUUCCC&UGGAGAAGCAGGGCACGUGCA	0	0	NA	NA	NA	1	38.0243	4	0.259144	Output/short456/cleaveLand_result/t_plot/ath-miR164b-5p_TRINITY_DN3244_c1_g1_i24_1774_TPlot.pdf	0	38.0243	-Inf	down	6.9845e-10	7.47646e-10
ath-miR164b-5p	TRINITY_DN3244_c1_g1_i32	TRINITY_DN3244_c1_g1	NA	NA	GO:2001142|nicotinate transport;GO:2001143|N-methylnicotinate transport;GO:0005886|plasma membrane;GO:0016021|integral component of membrane;GO:0005524|ATP binding;GO:0090416|nicotinate transmembrane transporter activity;GO:0090417|N-methylnicotinate transmembrane transporter activity	NA	1798	1818	1809	0.654628	5.5	UGUAUGUGUACUGCUUUUCCC&UGGAGAAGCAGGGCACGUGCA	0	0	NA	NA	NA	1	38.0243	4	0.267619	Output/short456/cleaveLand_result/t_plot/ath-miR164b-5p_TRINITY_DN3244_c1_g1_i32_1809_TPlot.pdf	0	38.0243	-Inf	down	6.9845e-10	7.47646e-10
ath-miR164b-5p	TRINITY_DN3244_c1_g1_i37	TRINITY_DN3244_c1_g1	NA	NA	GO:2001142|nicotinate transport;GO:2001143|N-methylnicotinate transport;GO:0005886|plasma membrane;GO:0016021|integral component of membrane;GO:0005524|ATP binding;GO:0090416|nicotinate transmembrane transporter activity;GO:0090417|N-methylnicotinate transmembrane transporter activity	NA	1580	1600	1591	0.654628	5.5	UGUAUGUGUACUGCUUUUCCC&UGGAGAAGCAGGGCACGUGCA	0	0	NA	NA	NA	1	38.0243	4	0.257672	Output/short456/cleaveLand_result/t_plot/ath-miR164b-5p_TRINITY_DN3244_c1_g1_i37_1591_TPlot.pdf	0	38.0243	-Inf	down	6.9845e-10	7.47646e-10
ath-miR164b-5p	TRINITY_DN3244_c1_g1_i7	TRINITY_DN3244_c1_g1	NA	NA	GO:2001142|nicotinate transport;GO:2001143|N-methylnicotinate transport;GO:0005886|plasma membrane;GO:0016021|integral component of membrane;GO:0005524|ATP binding;GO:0090416|nicotinate transmembrane transporter activity;GO:0090417|N-methylnicotinate transmembrane transporter activity	NA	2059	2079	2070	0.654628	5.5	UGUAUGUGUACUGCUUUUCCC&UGGAGAAGCAGGGCACGUGCA	0	0	NA	NA	NA	2	76.0485	3	0.381195	Output/short456/cleaveLand_result/t_plot/ath-miR164b-5p_TRINITY_DN3244_c1_g1_i7_2070_TPlot.pdf	0	76.0485	-Inf	down	2.7637e-18	4.06116e-18
ath-miR165a-5p	TRINITY_DN26905_c0_g1_i1	TRINITY_DN26905_c0_g1	NA	NA	NA	NA	160	179	171	0.662404	7	CCUGGAUCCAAA-AACAUUCC&GGAAUGUUGUCUGGAUCGAGG	0	0	NA	NA	NA	2	76.0485	3	0.305611	Output/short456/cleaveLand_result/t_plot/ath-miR165a-5p_TRINITY_DN26905_c0_g1_i1_171_TPlot.pdf	0	76.0485	-Inf	down	2.7637e-18	4.06116e-18
ath-miR165a-5p	TRINITY_DN26905_c0_g1_i2	TRINITY_DN26905_c0_g1	NA	NA	NA	NA	143	162	154	0.662404	7	CCUGGAUCCAAA-AACAUUCC&GGAAUGUUGUCUGGAUCGAGG	0	0	NA	NA	NA	3	114.073	1	0.0119641	Output/short456/cleaveLand_result/t_plot/ath-miR165a-5p_TRINITY_DN26905_c0_g1_i2_154_TPlot.pdf	0	114.073	-Inf	down	1.252e-26	2.10489e-26
ath-miR165a-5p	TRINITY_DN529_c0_g2_i2	TRINITY_DN529_c0_g2	NA	NA	GO:0006355|regulation of transcription, DNA-templated;GO:0045893|positive regulation of transcription, DNA-templated;GO:0005634|nucleus;GO:0000976|transcription regulatory region sequence-specific DNA binding;GO:0003700|DNA-binding transcription factor activity;GO:0042802|identical protein binding;GO:0043565|sequence-specific DNA binding	NA	922	942	933	0.654731	6.5	UCAGGAUCCAGGCAAGAUUCU&GGAAUGUUGUCUGGAUCGAGG	3	194.313	3	0.33493	Output/long789/cleaveLand_result/t_plot/ath-miR165a-5p_TRINITY_DN529_c0_g2_i2_933_TPlot.pdf	22	836.534	0	0.0624232	Output/short456/cleaveLand_result/t_plot/ath-miR165a-5p_TRINITY_DN529_c0_g2_i2_933_TPlot.pdf	194.313	836.534	-2.10604	down	0	0
ath-miR165a-5p	TRINITY_DN60803_c0_g1_i1	TRINITY_DN60803_c0_g1	NA	NA	GO:0006914|autophagy;GO:0015031|protein transport;GO:0051258|protein polymerization;GO:0005737|cytoplasm;GO:0005773|vacuole;GO:0008270|zinc ion binding;GO:0043130|ubiquitin binding	NA	1121	1141	1132	0.713555	6	CCUCGAGCCAGAUGAUUUUCC&GGAAUGUUGUCUGGAUCGAGG	0	0	NA	NA	NA	1	38.0243	4	0.0551568	Output/short456/cleaveLand_result/t_plot/ath-miR165a-5p_TRINITY_DN60803_c0_g1_i1_1132_TPlot.pdf	0	38.0243	-Inf	down	6.9845e-10	7.47646e-10
ath-miR166a-5p	TRINITY_DN60803_c0_g1_i1	TRINITY_DN60803_c0_g1	NA	NA	GO:0006914|autophagy;GO:0015031|protein transport;GO:0051258|protein polymerization;GO:0005737|cytoplasm;GO:0005773|vacuole;GO:0008270|zinc ion binding;GO:0043130|ubiquitin binding	NA	1121	1141	1132	0.753456	7	CCUCGAGCCAGAUGAUUUUCC&GGACUGUUGUCUGGCUCGAGG	0	0	NA	NA	NA	1	38.0243	4	0.0312421	Output/short456/cleaveLand_result/t_plot/ath-miR166a-5p_TRINITY_DN60803_c0_g1_i1_1132_TPlot.pdf	0	38.0243	-Inf	down	6.9845e-10	7.47646e-10
ath-miR167d	TRINITY_DN34956_c1_g1_i1	TRINITY_DN34956_c1_g1	NA	NA	GO:0006986|response to unfolded protein;GO:0009266|response to temperature stimulus;GO:0009408|response to heat;GO:0009615|response to virus;GO:0009617|response to bacterium;GO:0016567|protein ubiquitination;GO:0034620|cellular response to unfolded protein;GO:0042026|protein refolding;GO:0046686|response to cadmium ion;GO:0051085|chaperone cofactor-dependent protein refolding;GO:0005618|cell wall…	ko03040;ko04141;ko04144	1298	1319	1310	0.714943	7	CCAGGUGGUGCCGGUGGCUUCC&UGAAGCUGCCAGCAUGAUCUGG	28	1813.59	3	0.0321493	Output/long789/cleaveLand_result/t_plot/ath-miR167d_TRINITY_DN34956_c1_g1_i1_1310_TPlot.pdf	0	0	NA	NA	NA	1813.59	0	Inf	up	0	0
ath-miR168a-5p	TRINITY_DN2640_c1_g1_i1	TRINITY_DN2640_c1_g1	NA	NA	GO:0006417|regulation of translation;GO:0009616|RNAi-mediated antiviral immune response;GO:0009733|response to auxin;GO:0009850|auxin metabolic process;GO:0009955|adaxial/abaxial pattern specification;GO:0009965|leaf morphogenesis;GO:0010218|response to far red light;GO:0010305|leaf vascular tissue pattern formation;GO:0010589|leaf proximal/distal pattern formation;GO:0016032|viral process;GO:001…	NA	638	658	649	0.80778	6	UCCCCGAGCUGCACCAAGCUA&UCGCUUGGUGCAGGUCGGGAA	3	194.313	3	0.016206	Output/long789/cleaveLand_result/t_plot/ath-miR168a-5p_TRINITY_DN2640_c1_g1_i1_649_TPlot.pdf	0	0	NA	NA	NA	194.313	0	Inf	up	3.6042e-44	8.09893e-44
ath-miR168a-5p	TRINITY_DN2640_c1_g1_i2	TRINITY_DN2640_c1_g1	NA	NA	GO:0006417|regulation of translation;GO:0009616|RNAi-mediated antiviral immune response;GO:0009733|response to auxin;GO:0009850|auxin metabolic process;GO:0009955|adaxial/abaxial pattern specification;GO:0009965|leaf morphogenesis;GO:0010218|response to far red light;GO:0010305|leaf vascular tissue pattern formation;GO:0010589|leaf proximal/distal pattern formation;GO:0016032|viral process;GO:001…	NA	638	658	649	0.80778	6	UCCCCGAGCUGCACCAAGCUA&UCGCUUGGUGCAGGUCGGGAA	3	194.313	3	0.0156105	Output/long789/cleaveLand_result/t_plot/ath-miR168a-5p_TRINITY_DN2640_c1_g1_i2_649_TPlot.pdf	0	0	NA	NA	NA	194.313	0	Inf	up	3.6042e-44	8.09893e-44
ath-miR168a-5p	TRINITY_DN5396_c0_g1_i12	TRINITY_DN5396_c0_g1	NA	NA	NA	NA	2030	2050	2041	0.755149	7	UUUACGACCUGCACCAAGCAU&UCGCUUGGUGCAGGUCGGGAA	0	0	NA	NA	NA	2	76.0485	3	0.0541975	Output/short456/cleaveLand_result/t_plot/ath-miR168a-5p_TRINITY_DN5396_c0_g1_i12_2041_TPlot.pdf	0	76.0485	-Inf	down	2.7637e-18	4.06116e-18
ath-miR168a-5p	TRINITY_DN5396_c0_g1_i9	TRINITY_DN5396_c0_g1	NA	NA	NA	NA	1730	1750	1741	0.755149	7	UUUACGACCUGCACCAAGCAU&UCGCUUGGUGCAGGUCGGGAA	0	0	NA	NA	NA	2	76.0485	3	0.052999	Output/short456/cleaveLand_result/t_plot/ath-miR168a-5p_TRINITY_DN5396_c0_g1_i9_1741_TPlot.pdf	0	76.0485	-Inf	down	2.7637e-18	4.06116e-18
ath-miR172a	TRINITY_DN5374_c0_g1_i10	TRINITY_DN5374_c0_g1	NA	NA	GO:0007263|nitric oxide mediated signal transduction;GO:0009739|response to gibberellin;GO:0042742|defense response to bacterium;GO:0045892|negative regulation of transcription, DNA-templated;GO:0005634|nucleus;GO:0000976|transcription regulatory region sequence-specific DNA binding;GO:0003700|DNA-binding transcription factor activity;GO:0043565|sequence-specific DNA binding	ko04016;ko04626	426	446	437	0.720117	6	AUUCAGCAUCAUCAUGAUUCG&AGAAUCUUGAUGAUGCUGCAU	0	0	NA	NA	NA	9	342.218	0	0.0249311	Output/short456/cleaveLand_result/t_plot/ath-miR172a_TRINITY_DN5374_c0_g1_i10_437_TPlot.pdf	0	342.218	-Inf	down	2.0371e-76	8.65019e-76
ath-miR172a	TRINITY_DN5374_c0_g1_i11	TRINITY_DN5374_c0_g1	NA	NA	GO:0007263|nitric oxide mediated signal transduction;GO:0009739|response to gibberellin;GO:0042742|defense response to bacterium;GO:0045892|negative regulation of transcription, DNA-templated;GO:0005634|nucleus;GO:0000976|transcription regulatory region sequence-specific DNA binding;GO:0003700|DNA-binding transcription factor activity;GO:0043565|sequence-specific DNA binding	NA	426	446	437	0.720117	6	AUUCAGCAUCAUCAUGAUUCG&AGAAUCUUGAUGAUGCUGCAU	0	0	NA	NA	NA	14	532.34	0	0.0250243	Output/short456/cleaveLand_result/t_plot/ath-miR172a_TRINITY_DN5374_c0_g1_i11_437_TPlot.pdf	0	532.34	-Inf	down	0	0
ath-miR172a	TRINITY_DN5374_c0_g1_i13	TRINITY_DN5374_c0_g1	NA	NA	GO:0007263|nitric oxide mediated signal transduction;GO:0009739|response to gibberellin;GO:0042742|defense response to bacterium;GO:0045892|negative regulation of transcription, DNA-templated;GO:0005634|nucleus;GO:0000976|transcription regulatory region sequence-specific DNA binding;GO:0003700|DNA-binding transcription factor activity;GO:0043565|sequence-specific DNA binding	ko04016;ko04626	426	446	437	0.720117	6	AUUCAGCAUCAUCAUGAUUCG&AGAAUCUUGAUGAUGCUGCAU	0	0	NA	NA	NA	10	380.243	2	0.0983445	Output/short456/cleaveLand_result/t_plot/ath-miR172a_TRINITY_DN5374_c0_g1_i13_437_TPlot.pdf	0	380.243	-Inf	down	1.0627e-84	4.7946e-84
ath-miR172a	TRINITY_DN5374_c0_g1_i3	TRINITY_DN5374_c0_g1	NA	NA	GO:0007263|nitric oxide mediated signal transduction;GO:0009739|response to gibberellin;GO:0042742|defense response to bacterium;GO:0045892|negative regulation of transcription, DNA-templated;GO:0005634|nucleus;GO:0000976|transcription regulatory region sequence-specific DNA binding;GO:0003700|DNA-binding transcription factor activity;GO:0043565|sequence-specific DNA binding	NA	426	446	437	0.720117	6	AUUCAGCAUCAUCAUGAUUCG&AGAAUCUUGAUGAUGCUGCAU	0	0	NA	NA	NA	12	456.291	0	0.0246513	Output/short456/cleaveLand_result/t_plot/ath-miR172a_TRINITY_DN5374_c0_g1_i3_437_TPlot.pdf	0	456.291	-Inf	down	0	0
ath-miR172a	TRINITY_DN5374_c0_g1_i8	TRINITY_DN5374_c0_g1	NA	NA	GO:0007263|nitric oxide mediated signal transduction;GO:0009739|response to gibberellin;GO:0042742|defense response to bacterium;GO:0045892|negative regulation of transcription, DNA-templated;GO:0005634|nucleus;GO:0000976|transcription regulatory region sequence-specific DNA binding;GO:0003700|DNA-binding transcription factor activity;GO:0043565|sequence-specific DNA binding	ko04016;ko04626	426	446	437	0.720117	6	AUUCAGCAUCAUCAUGAUUCG&AGAAUCUUGAUGAUGCUGCAU	0	0	NA	NA	NA	8	304.194	0	0.0241848	Output/short456/cleaveLand_result/t_plot/ath-miR172a_TRINITY_DN5374_c0_g1_i8_437_TPlot.pdf	0	304.194	-Inf	down	3.9261e-68	1.47708e-67
ath-miR172a	TRINITY_DN5374_c0_g1_i9	TRINITY_DN5374_c0_g1	NA	NA	GO:0006952|defense response;GO:0010200|response to chitin;GO:0005634|nucleus;GO:0000976|transcription regulatory region sequence-specific DNA binding;GO:0003700|DNA-binding transcription factor activity;GO:0043565|sequence-specific DNA binding	NA	426	446	437	0.720117	6	AUUCAGCAUCAUCAUGAUUCG&AGAAUCUUGAUGAUGCUGCAU	0	0	NA	NA	NA	15	570.364	0	0.024558	Output/short456/cleaveLand_result/t_plot/ath-miR172a_TRINITY_DN5374_c0_g1_i9_437_TPlot.pdf	0	570.364	-Inf	down	0	0
ath-miR390b-5p	TRINITY_DN440_c0_g1_i13	TRINITY_DN440_c0_g1	NA	NA	GO:0009826|unidimensional cell growth;GO:0000139|Golgi membrane;GO:0005794|Golgi apparatus;GO:0016021|integral component of membrane;GO:0015020|glucuronosyltransferase activity	NA	511	533	524	0.681716	5	GGUCGUUAUUCACUCUUGAGCUU&AAGCUCAGGAG-GGAUAGCG-CC	0	0	NA	NA	NA	4	152.097	3	0.145866	Output/short456/cleaveLand_result/t_plot/ath-miR390b-5p_TRINITY_DN440_c0_g1_i13_524_TPlot.pdf	0	152.097	-Inf	down	5.9991e-35	1.17839e-34
ath-miR390b-5p	TRINITY_DN440_c0_g1_i14	TRINITY_DN440_c0_g1	NA	NA	GO:0009826|unidimensional cell growth;GO:0000139|Golgi membrane;GO:0005794|Golgi apparatus;GO:0016021|integral component of membrane;GO:0015020|glucuronosyltransferase activity	NA	511	533	524	0.681716	5	GGUCGUUAUUCACUCUUGAGCUU&AAGCUCAGGAG-GGAUAGCG-CC	0	0	NA	NA	NA	2	76.0485	3	0.146947	Output/short456/cleaveLand_result/t_plot/ath-miR390b-5p_TRINITY_DN440_c0_g1_i14_524_TPlot.pdf	0	76.0485	-Inf	down	2.7637e-18	4.06116e-18
ath-miR390b-5p	TRINITY_DN440_c0_g1_i15	TRINITY_DN440_c0_g1	NA	NA	GO:0009826|unidimensional cell growth;GO:0000139|Golgi membrane;GO:0005794|Golgi apparatus;GO:0016021|integral component of membrane;GO:0015020|glucuronosyltransferase activity	NA	511	533	524	0.681716	5	GGUCGUUAUUCACUCUUGAGCUU&AAGCUCAGGAG-GGAUAGCG-CC	0	0	NA	NA	NA	5	190.121	2	0.0891745	Output/short456/cleaveLand_result/t_plot/ath-miR390b-5p_TRINITY_DN440_c0_g1_i15_524_TPlot.pdf	0	190.121	-Inf	down	2.9642e-43	6.43543e-43
ath-miR390b-5p	TRINITY_DN440_c0_g1_i4	TRINITY_DN440_c0_g1	NA	NA	GO:0009826|unidimensional cell growth;GO:0000139|Golgi membrane;GO:0005794|Golgi apparatus;GO:0016021|integral component of membrane;GO:0015020|glucuronosyltransferase activity	NA	511	533	524	0.681716	5	GGUCGUUAUUCACUCUUGAGCUU&AAGCUCAGGAG-GGAUAGCG-CC	0	0	NA	NA	NA	4	152.097	3	0.145325	Output/short456/cleaveLand_result/t_plot/ath-miR390b-5p_TRINITY_DN440_c0_g1_i4_524_TPlot.pdf	0	152.097	-Inf	down	5.9991e-35	1.17839e-34
ath-miR390b-5p	TRINITY_DN440_c0_g1_i5	TRINITY_DN440_c0_g1	NA	NA	GO:0009826|unidimensional cell growth;GO:0000139|Golgi membrane;GO:0005794|Golgi apparatus;GO:0016021|integral component of membrane;GO:0015020|glucuronosyltransferase activity	NA	511	533	524	0.681716	5	GGUCGUUAUUCACUCUUGAGCUU&AAGCUCAGGAG-GGAUAGCG-CC	0	0	NA	NA	NA	4	152.097	3	0.142071	Output/short456/cleaveLand_result/t_plot/ath-miR390b-5p_TRINITY_DN440_c0_g1_i5_524_TPlot.pdf	0	152.097	-Inf	down	5.9991e-35	1.17839e-34
ath-miR390b-5p	TRINITY_DN440_c0_g1_i9	TRINITY_DN440_c0_g1	NA	NA	GO:0009826|unidimensional cell growth;GO:0000139|Golgi membrane;GO:0005794|Golgi apparatus;GO:0016021|integral component of membrane;GO:0015020|glucuronosyltransferase activity	NA	511	533	524	0.681716	5	GGUCGUUAUUCACUCUUGAGCUU&AAGCUCAGGAG-GGAUAGCG-CC	0	0	NA	NA	NA	2	76.0485	3	0.139351	Output/short456/cleaveLand_result/t_plot/ath-miR390b-5p_TRINITY_DN440_c0_g1_i9_524_TPlot.pdf	0	76.0485	-Inf	down	2.7637e-18	4.06116e-18
ath-miR393a-5p	TRINITY_DN112_c0_g1_i15	TRINITY_DN112_c0_g1	NA	NA	GO:0006952|defense response;GO:0007049|cell cycle;GO:0009733|response to auxin;GO:0009734|auxin-activated signaling pathway;GO:0009873|ethylene-activated signaling pathway;GO:0010152|pollen maturation;GO:0010311|lateral root formation;GO:0016036|cellular response to phosphate starvation;GO:0031146|SCF-dependent proteasomal ubiquitin-dependent protein catabolic process;GO:0048443|stamen developmen…	ko04075	1730	1751	1742	0.796569	4.5	GAGUCAAUGCGAUCCCUAUGGA&UCCAAAGGGAUCGCAUUGAUCC	30	1943.13	2	0.00489672	Output/long789/cleaveLand_result/t_plot/ath-miR393a-5p_TRINITY_DN112_c0_g1_i15_1742_TPlot.pdf	13	494.315	2	0.00543375	Output/short456/cleaveLand_result/t_plot/ath-miR393a-5p_TRINITY_DN112_c0_g1_i15_1742_TPlot.pdf	1943.13	494.315	1.97488	up	0	0
ath-miR393a-5p	TRINITY_DN112_c0_g1_i25	TRINITY_DN112_c0_g1	NA	NA	GO:0006952|defense response;GO:0007049|cell cycle;GO:0009733|response to auxin;GO:0009734|auxin-activated signaling pathway;GO:0009873|ethylene-activated signaling pathway;GO:0010152|pollen maturation;GO:0010311|lateral root formation;GO:0016036|cellular response to phosphate starvation;GO:0031146|SCF-dependent proteasomal ubiquitin-dependent protein catabolic process;GO:0048443|stamen developmen…	ko04075	1825	1846	1837	0.796569	4.5	GAGUCAAUGCGAUCCCUAUGGA&UCCAAAGGGAUCGCAUUGAUCC	20	1295.42	2	0.00419866	Output/long789/cleaveLand_result/t_plot/ath-miR393a-5p_TRINITY_DN112_c0_g1_i25_1837_TPlot.pdf	12	456.291	2	0.00465931	Output/short456/cleaveLand_result/t_plot/ath-miR393a-5p_TRINITY_DN112_c0_g1_i25_1837_TPlot.pdf	1295.42	456.291	1.50539	up	0	0
ath-miR393a-5p	TRINITY_DN112_c0_g1_i6	TRINITY_DN112_c0_g1	NA	NA	GO:0006952|defense response;GO:0007049|cell cycle;GO:0009733|response to auxin;GO:0009734|auxin-activated signaling pathway;GO:0009873|ethylene-activated signaling pathway;GO:0010152|pollen maturation;GO:0010311|lateral root formation;GO:0016036|cellular response to phosphate starvation;GO:0031146|SCF-dependent proteasomal ubiquitin-dependent protein catabolic process;GO:0048443|stamen developmen…	ko04075	1916	1937	1928	0.796569	4.5	GAGUCAAUGCGAUCCCUAUGGA&UCCAAAGGGAUCGCAUUGAUCC	32	2072.67	0	0.0012394	Output/long789/cleaveLand_result/t_plot/ath-miR393a-5p_TRINITY_DN112_c0_g1_i6_1928_TPlot.pdf	5	190.121	3	0.00819781	Output/short456/cleaveLand_result/t_plot/ath-miR393a-5p_TRINITY_DN112_c0_g1_i6_1928_TPlot.pdf	2072.67	190.121	3.4465	up	0	0
ath-miR393a-5p	TRINITY_DN2176_c1_g1_i1	TRINITY_DN2176_c1_g1	NA	NA	GO:0006952|defense response;GO:0007049|cell cycle;GO:0009733|response to auxin;GO:0009734|auxin-activated signaling pathway;GO:0009873|ethylene-activated signaling pathway;GO:0010152|pollen maturation;GO:0010311|lateral root formation;GO:0016036|cellular response to phosphate starvation;GO:0031146|SCF-dependent proteasomal ubiquitin-dependent protein catabolic process;GO:0048443|stamen developmen…	ko04075	1771	1793	1784	0.901961	2	GGAGACAAUGCGAUCCCUUUGGA&UCCAAAGGGAUCGCAUUG-AUCC	0	0	NA	NA	NA	6	228.146	3	0.00252959	Output/short456/cleaveLand_result/t_plot/ath-miR393a-5p_TRINITY_DN2176_c1_g1_i1_1784_TPlot.pdf	0	228.146	-Inf	down	1.4931e-51	4.44467e-51
ath-miR393a-5p	TRINITY_DN2176_c1_g1_i2	TRINITY_DN2176_c1_g1	NA	NA	GO:0006952|defense response;GO:0007049|cell cycle;GO:0009733|response to auxin;GO:0009734|auxin-activated signaling pathway;GO:0009873|ethylene-activated signaling pathway;GO:0010152|pollen maturation;GO:0010311|lateral root formation;GO:0016036|cellular response to phosphate starvation;GO:0031146|SCF-dependent proteasomal ubiquitin-dependent protein catabolic process;GO:0048443|stamen developmen…	ko04075	1771	1793	1784	0.901961	2	GGAGACAAUGCGAUCCCUUUGGA&UCCAAAGGGAUCGCAUUG-AUCC	0	0	NA	NA	NA	3	114.073	0	0.000478051	Output/short456/cleaveLand_result/t_plot/ath-miR393a-5p_TRINITY_DN2176_c1_g1_i2_1784_TPlot.pdf	0	114.073	-Inf	down	1.252e-26	2.10489e-26
ath-miR393a-5p	TRINITY_DN2176_c1_g2_i2	TRINITY_DN2176_c1_g2	NA	NA	GO:0006952|defense response;GO:0007049|cell cycle;GO:0009733|response to auxin;GO:0009734|auxin-activated signaling pathway;GO:0009873|ethylene-activated signaling pathway;GO:0010152|pollen maturation;GO:0010311|lateral root formation;GO:0016036|cellular response to phosphate starvation;GO:0031146|SCF-dependent proteasomal ubiquitin-dependent protein catabolic process;GO:0048443|stamen developmen…	ko04075	1794	1816	1807	0.901961	2	GGAGACAAUGCGAUCCCUUUGGA&UCCAAAGGGAUCGCAUUG-AUCC	27	1748.82	3	0.00181377	Output/long789/cleaveLand_result/t_plot/ath-miR393a-5p_TRINITY_DN2176_c1_g2_i2_1807_TPlot.pdf	0	0	NA	NA	NA	1748.82	0	Inf	up	0	0
ath-miR394a	TRINITY_DN2142_c0_g1_i18	TRINITY_DN2142_c0_g1	NA	NA	GO:0006457|protein folding;GO:0005737|cytoplasm;GO:0005524|ATP binding;GO:0051082|unfolded protein binding	ko04141;ko04626	2334	2356	2347	0.702551	7	GGAGAAUAUGGAUGGAGUGCCAA&UUGGCAUUCUGUCCA---CCUCC	1	64.771	4	0.133256	Output/long789/cleaveLand_result/t_plot/ath-miR394a_TRINITY_DN2142_c0_g1_i18_2347_TPlot.pdf	0	0	NA	NA	NA	64.771	0	Inf	up	8.4037e-16	1.0516e-15
ath-miR394a	TRINITY_DN2142_c0_g1_i2	TRINITY_DN2142_c0_g1	NA	NA	GO:0006457|protein folding;GO:0005737|cytoplasm;GO:0005524|ATP binding;GO:0051082|unfolded protein binding	ko04141;ko04626	1945	1967	1958	0.702551	7	GGAGAAUAUGGAUGGAGUGCCAA&UUGGCAUUCUGUCCA---CCUCC	3	194.313	3	0.233297	Output/long789/cleaveLand_result/t_plot/ath-miR394a_TRINITY_DN2142_c0_g1_i2_1958_TPlot.pdf	0	0	NA	NA	NA	194.313	0	Inf	up	3.6042e-44	8.09893e-44
ath-miR394a	TRINITY_DN2142_c0_g1_i3	TRINITY_DN2142_c0_g1	NA	NA	GO:0006457|protein folding;GO:0005737|cytoplasm;GO:0005524|ATP binding;GO:0051082|unfolded protein binding	ko04141;ko04626	2346	2368	2359	0.702551	7	GGAGAAUAUGGAUGGAGUGCCAA&UUGGCAUUCUGUCCA---CCUCC	2	129.542	3	0.234224	Output/long789/cleaveLand_result/t_plot/ath-miR394a_TRINITY_DN2142_c0_g1_i3_2359_TPlot.pdf	0	0	NA	NA	NA	129.542	0	Inf	up	5.1393e-30	9.14621e-30
ath-miR394a	TRINITY_DN25161_c0_g1_i10	TRINITY_DN25161_c0_g1	NA	NA	GO:0000122|negative regulation of transcription by RNA polymerase II;GO:0009908|flower development;GO:0030154|cell differentiation;GO:0045892|negative regulation of transcription, DNA-templated;GO:0045944|positive regulation of transcription by RNA polymerase II;GO:0005634|nucleus;GO:0005667|transcription regulator complex;GO:0001102|RNA polymerase II activating transcription factor binding	NA	841	859	851	0.681122	7	GGUGGUGGAGAGGG-GCCAA&UUGGCAUUCUGUCCACCUCC	0	0	NA	NA	NA	2	76.0485	3	0.323406	Output/short456/cleaveLand_result/t_plot/ath-miR394a_TRINITY_DN25161_c0_g1_i10_851_TPlot.pdf	0	76.0485	-Inf	down	2.7637e-18	4.06116e-18
ath-miR394a	TRINITY_DN25161_c0_g1_i2	TRINITY_DN25161_c0_g1	NA	NA	GO:0000122|negative regulation of transcription by RNA polymerase II;GO:0009793|embryo development ending in seed dormancy;GO:0010044|response to aluminum ion;GO:0030154|cell differentiation;GO:0045892|negative regulation of transcription, DNA-templated;GO:0045944|positive regulation of transcription by RNA polymerase II;GO:0047484|regulation of response to osmotic stress;GO:0048467|gynoecium dev…	NA	815	833	825	0.681122	7	GGUGGUGGAGAGGG-GCCAA&UUGGCAUUCUGUCCACCUCC	0	0	NA	NA	NA	1	38.0243	4	0.210275	Output/short456/cleaveLand_result/t_plot/ath-miR394a_TRINITY_DN25161_c0_g1_i2_825_TPlot.pdf	0	38.0243	-Inf	down	6.9845e-10	7.47646e-10
ath-miR394a	TRINITY_DN25161_c0_g1_i4	TRINITY_DN25161_c0_g1	NA	NA	NA	NA	480	498	490	0.681122	7	GGUGGUGGAGAGGG-GCCAA&UUGGCAUUCUGUCCACCUCC	0	0	NA	NA	NA	3	114.073	3	0.32212	Output/short456/cleaveLand_result/t_plot/ath-miR394a_TRINITY_DN25161_c0_g1_i4_490_TPlot.pdf	0	114.073	-Inf	down	1.252e-26	2.10489e-26
ath-miR394a	TRINITY_DN25161_c0_g1_i7	TRINITY_DN25161_c0_g1	NA	NA	GO:0000122|negative regulation of transcription by RNA polymerase II;GO:0009793|embryo development ending in seed dormancy;GO:0010044|response to aluminum ion;GO:0030154|cell differentiation;GO:0045892|negative regulation of transcription, DNA-templated;GO:0045944|positive regulation of transcription by RNA polymerase II;GO:0047484|regulation of response to osmotic stress;GO:0048467|gynoecium dev…	NA	638	656	648	0.681122	7	GGUGGUGGAGAGGG-GCCAA&UUGGCAUUCUGUCCACCUCC	0	0	NA	NA	NA	1	38.0243	4	0.212153	Output/short456/cleaveLand_result/t_plot/ath-miR394a_TRINITY_DN25161_c0_g1_i7_648_TPlot.pdf	0	38.0243	-Inf	down	6.9845e-10	7.47646e-10
ath-miR394a	TRINITY_DN30474_c0_g1_i18	TRINITY_DN30474_c0_g1	NA	NA	GO:0005765|lysosomal membrane;GO:0005770|late endosome;GO:0016021|integral component of membrane	NA	1698	1717	1708	0.785714	6	GGAGGUGGAGCGGAUGUCAA&UUGGCAUUCUGUCCACCUCC	0	0	NA	NA	NA	3	114.073	3	0.0348379	Output/short456/cleaveLand_result/t_plot/ath-miR394a_TRINITY_DN30474_c0_g1_i18_1708_TPlot.pdf	0	114.073	-Inf	down	1.252e-26	2.10489e-26
ath-miR394a	TRINITY_DN30474_c0_g1_i22	TRINITY_DN30474_c0_g1	NA	NA	GO:0005765|lysosomal membrane;GO:0005770|late endosome;GO:0016021|integral component of membrane	NA	641	660	651	0.785714	6	GGAGGUGGAGCGGAUGUCAA&UUGGCAUUCUGUCCACCUCC	0	0	NA	NA	NA	6	228.146	2	0.0200341	Output/short456/cleaveLand_result/t_plot/ath-miR394a_TRINITY_DN30474_c0_g1_i22_651_TPlot.pdf	0	228.146	-Inf	down	1.4931e-51	4.44467e-51
ath-miR394a	TRINITY_DN30474_c0_g1_i26	TRINITY_DN30474_c0_g1	NA	NA	GO:0005765|lysosomal membrane;GO:0005770|late endosome;GO:0016021|integral component of membrane	NA	1050	1069	1060	0.785714	6	GGAGGUGGAGCGGAUGUCAA&UUGGCAUUCUGUCCACCUCC	0	0	NA	NA	NA	2	76.0485	3	0.031164	Output/short456/cleaveLand_result/t_plot/ath-miR394a_TRINITY_DN30474_c0_g1_i26_1060_TPlot.pdf	0	76.0485	-Inf	down	2.7637e-18	4.06116e-18
ath-miR394a	TRINITY_DN30474_c0_g1_i33	TRINITY_DN30474_c0_g1	NA	NA	GO:0005765|lysosomal membrane;GO:0005770|late endosome;GO:0016021|integral component of membrane	NA	845	864	855	0.785714	6	GGAGGUGGAGCGGAUGUCAA&UUGGCAUUCUGUCCACCUCC	0	0	NA	NA	NA	3	114.073	3	0.0360594	Output/short456/cleaveLand_result/t_plot/ath-miR394a_TRINITY_DN30474_c0_g1_i33_855_TPlot.pdf	0	114.073	-Inf	down	1.252e-26	2.10489e-26
ath-miR394a	TRINITY_DN30474_c0_g1_i35	TRINITY_DN30474_c0_g1	NA	NA	GO:0005765|lysosomal membrane;GO:0005770|late endosome;GO:0016021|integral component of membrane	NA	1972	1991	1982	0.785714	6	GGAGGUGGAGCGGAUGUCAA&UUGGCAUUCUGUCCACCUCC	0	0	NA	NA	NA	1	38.0243	4	0.0215853	Output/short456/cleaveLand_result/t_plot/ath-miR394a_TRINITY_DN30474_c0_g1_i35_1982_TPlot.pdf	0	38.0243	-Inf	down	6.9845e-10	7.47646e-10
ath-miR394a	TRINITY_DN30474_c0_g1_i37	TRINITY_DN30474_c0_g1	NA	NA	GO:0005765|lysosomal membrane;GO:0005770|late endosome;GO:0016021|integral component of membrane	NA	1124	1143	1134	0.785714	6	GGAGGUGGAGCGGAUGUCAA&UUGGCAUUCUGUCCACCUCC	0	0	NA	NA	NA	1	38.0243	4	0.0208086	Output/short456/cleaveLand_result/t_plot/ath-miR394a_TRINITY_DN30474_c0_g1_i37_1134_TPlot.pdf	0	38.0243	-Inf	down	6.9845e-10	7.47646e-10
ath-miR394a	TRINITY_DN30474_c0_g1_i6	TRINITY_DN30474_c0_g1	NA	NA	GO:0005765|lysosomal membrane;GO:0005770|late endosome;GO:0016021|integral component of membrane	NA	1000	1019	1010	0.785714	6	GGAGGUGGAGCGGAUGUCAA&UUGGCAUUCUGUCCACCUCC	0	0	NA	NA	NA	3	114.073	3	0.0354488	Output/short456/cleaveLand_result/t_plot/ath-miR394a_TRINITY_DN30474_c0_g1_i6_1010_TPlot.pdf	0	114.073	-Inf	down	1.252e-26	2.10489e-26
ath-miR394a	TRINITY_DN30474_c0_g1_i9	TRINITY_DN30474_c0_g1	NA	NA	GO:0005765|lysosomal membrane;GO:0005770|late endosome;GO:0016021|integral component of membrane	NA	1124	1143	1134	0.785714	6	GGAGGUGGAGCGGAUGUCAA&UUGGCAUUCUGUCCACCUCC	0	0	NA	NA	NA	6	228.146	2	0.0196527	Output/short456/cleaveLand_result/t_plot/ath-miR394a_TRINITY_DN30474_c0_g1_i9_1134_TPlot.pdf	0	228.146	-Inf	down	1.4931e-51	4.44467e-51
ath-miR413	TRINITY_DN11371_c0_g1_i1	TRINITY_DN11371_c0_g1	NA	NA	NA	NA	16	36	27	0.843844	3.5	GUGUUGAACAAGAGGAACUGU&AUAGUUUCUCUUGUUCUGCAC	3	194.313	3	0.0126275	Output/long789/cleaveLand_result/t_plot/ath-miR413_TRINITY_DN11371_c0_g1_i1_27_TPlot.pdf	0	0	NA	NA	NA	194.313	0	Inf	up	3.6042e-44	8.09893e-44
ath-miR413	TRINITY_DN11371_c0_g1_i13	TRINITY_DN11371_c0_g1	NA	NA	NA	NA	16	36	27	0.843844	3.5	GUGUUGAACAAGAGGAACUGU&AUAGUUUCUCUUGUUCUGCAC	1	64.771	4	0.00615647	Output/long789/cleaveLand_result/t_plot/ath-miR413_TRINITY_DN11371_c0_g1_i13_27_TPlot.pdf	0	0	NA	NA	NA	64.771	0	Inf	up	8.4037e-16	1.0516e-15
ath-miR413	TRINITY_DN11371_c0_g1_i14	TRINITY_DN11371_c0_g1	NA	NA	NA	NA	16	36	27	0.843844	3.5	GUGUUGAACAAGAGGAACUGU&AUAGUUUCUCUUGUUCUGCAC	3	194.313	3	0.0132248	Output/long789/cleaveLand_result/t_plot/ath-miR413_TRINITY_DN11371_c0_g1_i14_27_TPlot.pdf	0	0	NA	NA	NA	194.313	0	Inf	up	3.6042e-44	8.09893e-44
ath-miR413	TRINITY_DN11371_c0_g1_i16	TRINITY_DN11371_c0_g1	NA	NA	NA	NA	16	36	27	0.843844	3.5	GUGUUGAACAAGAGGAACUGU&AUAGUUUCUCUUGUUCUGCAC	3	194.313	3	0.0144184	Output/long789/cleaveLand_result/t_plot/ath-miR413_TRINITY_DN11371_c0_g1_i16_27_TPlot.pdf	0	0	NA	NA	NA	194.313	0	Inf	up	3.6042e-44	8.09893e-44
ath-miR413	TRINITY_DN11371_c0_g1_i17	TRINITY_DN11371_c0_g1	NA	NA	NA	NA	16	36	27	0.843844	3.5	GUGUUGAACAAGAGGAACUGU&AUAGUUUCUCUUGUUCUGCAC	2	129.542	3	0.0108334	Output/long789/cleaveLand_result/t_plot/ath-miR413_TRINITY_DN11371_c0_g1_i17_27_TPlot.pdf	0	0	NA	NA	NA	129.542	0	Inf	up	5.1393e-30	9.14621e-30
ath-miR413	TRINITY_DN11371_c0_g1_i18	TRINITY_DN11371_c0_g1	NA	NA	NA	NA	16	36	27	0.843844	3.5	GUGUUGAACAAGAGGAACUGU&AUAGUUUCUCUUGUUCUGCAC	1	64.771	4	0.00551021	Output/long789/cleaveLand_result/t_plot/ath-miR413_TRINITY_DN11371_c0_g1_i18_27_TPlot.pdf	0	0	NA	NA	NA	64.771	0	Inf	up	8.4037e-16	1.0516e-15
ath-miR413	TRINITY_DN11371_c0_g1_i22	TRINITY_DN11371_c0_g1	NA	NA	NA	NA	16	36	27	0.843844	3.5	GUGUUGAACAAGAGGAACUGU&AUAGUUUCUCUUGUUCUGCAC	1	64.771	4	0.00389272	Output/long789/cleaveLand_result/t_plot/ath-miR413_TRINITY_DN11371_c0_g1_i22_27_TPlot.pdf	0	0	NA	NA	NA	64.771	0	Inf	up	8.4037e-16	1.0516e-15
ath-miR413	TRINITY_DN11371_c0_g1_i24	TRINITY_DN11371_c0_g1	NA	NA	GO:0009853|photorespiration;GO:0016311|dephosphorylation;GO:0009507|chloroplast;GO:0008967|phosphoglycolate phosphatase activity;GO:0016791|phosphatase activity	ko00630;ko01100;ko01110;ko01200	16	36	27	0.843844	3.5	GUGUUGAACAAGAGGAACUGU&AUAGUUUCUCUUGUUCUGCAC	1	64.771	4	0.00744773	Output/long789/cleaveLand_result/t_plot/ath-miR413_TRINITY_DN11371_c0_g1_i24_27_TPlot.pdf	0	0	NA	NA	NA	64.771	0	Inf	up	8.4037e-16	1.0516e-15
ath-miR413	TRINITY_DN11371_c0_g1_i6	TRINITY_DN11371_c0_g1	NA	NA	NA	NA	16	36	27	0.843844	3.5	GUGUUGAACAAGAGGAACUGU&AUAGUUUCUCUUGUUCUGCAC	2	129.542	3	0.0120298	Output/long789/cleaveLand_result/t_plot/ath-miR413_TRINITY_DN11371_c0_g1_i6_27_TPlot.pdf	0	0	NA	NA	NA	129.542	0	Inf	up	5.1393e-30	9.14621e-30
ath-miR413	TRINITY_DN11371_c0_g1_i7	TRINITY_DN11371_c0_g1	NA	NA	NA	NA	16	36	27	0.843844	3.5	GUGUUGAACAAGAGGAACUGU&AUAGUUUCUCUUGUUCUGCAC	2	129.542	3	0.00843615	Output/long789/cleaveLand_result/t_plot/ath-miR413_TRINITY_DN11371_c0_g1_i7_27_TPlot.pdf	0	0	NA	NA	NA	129.542	0	Inf	up	5.1393e-30	9.14621e-30
ath-miR413	TRINITY_DN11371_c0_g1_i8	TRINITY_DN11371_c0_g1	NA	NA	NA	NA	16	36	27	0.843844	3.5	GUGUUGAACAAGAGGAACUGU&AUAGUUUCUCUUGUUCUGCAC	1	64.771	4	0.00421643	Output/long789/cleaveLand_result/t_plot/ath-miR413_TRINITY_DN11371_c0_g1_i8_27_TPlot.pdf	0	0	NA	NA	NA	64.771	0	Inf	up	8.4037e-16	1.0516e-15
ath-miR413	TRINITY_DN2142_c0_g1_i17	TRINITY_DN2142_c0_g1	NA	NA	GO:0006457|protein folding;GO:0005737|cytoplasm;GO:0005524|ATP binding;GO:0051082|unfolded protein binding	ko04141;ko04626	1373	1394	1384	0.666667	7	UCCCAGAACAAGACGAAGCUAG&AUAGUUUC-UCUUGUUCUGCAC	39	2526.07	3	0.37474	Output/long789/cleaveLand_result/t_plot/ath-miR413_TRINITY_DN2142_c0_g1_i17_1384_TPlot.pdf	31	1178.75	3	0.388208	Output/short456/cleaveLand_result/t_plot/ath-miR413_TRINITY_DN2142_c0_g1_i17_1384_TPlot.pdf	2526.07	1178.75	1.09963	up	0	0
ath-miR413	TRINITY_DN2142_c0_g1_i20	TRINITY_DN2142_c0_g1	NA	NA	GO:0006457|protein folding;GO:0034605|cellular response to heat;GO:0050821|protein stabilization;GO:0005737|cytoplasm;GO:0005829|cytosol;GO:0005886|plasma membrane;GO:0009986|cell surface;GO:0032991|protein-containing complex;GO:0048471|perinuclear region of cytoplasm;GO:0005524|ATP binding;GO:0051082|unfolded protein binding	ko04141;ko04626	629	650	640	0.666667	7	UCCCAGAACAAGACGAAGCUAG&AUAGUUUC-UCUUGUUCUGCAC	38	2461.3	3	0.370183	Output/long789/cleaveLand_result/t_plot/ath-miR413_TRINITY_DN2142_c0_g1_i20_640_TPlot.pdf	34	1292.82	3	0.383542	Output/short456/cleaveLand_result/t_plot/ath-miR413_TRINITY_DN2142_c0_g1_i20_640_TPlot.pdf	2461.3	1292.82	0.928893	up	3.1439e-81	1.41292e-80
ath-miR413	TRINITY_DN2142_c0_g1_i7	TRINITY_DN2142_c0_g1	NA	NA	GO:0006457|protein folding;GO:0005737|cytoplasm;GO:0005524|ATP binding;GO:0051082|unfolded protein binding	ko04141;ko04626	1956	1977	1967	0.666667	7	UCCCAGAACAAGACGAAGCUAG&AUAGUUUC-UCUUGUUCUGCAC	37	2396.53	3	0.367509	Output/long789/cleaveLand_result/t_plot/ath-miR413_TRINITY_DN2142_c0_g1_i7_1967_TPlot.pdf	25	950.606	3	0.380803	Output/short456/cleaveLand_result/t_plot/ath-miR413_TRINITY_DN2142_c0_g1_i7_1967_TPlot.pdf	2396.53	950.606	1.33403	up	0	0
ath-miR413	TRINITY_DN2248_c1_g3_i2	TRINITY_DN2248_c1_g3	NA	NA	GO:0009741|response to brassinosteroid;GO:0009873|ethylene-activated signaling pathway;GO:0009910|negative regulation of flower development;GO:0045892|negative regulation of transcription, DNA-templated;GO:0048366|leaf development;GO:0048527|lateral root development;GO:0071456|cellular response to hypoxia;GO:0005634|nucleus;GO:0000976|transcription regulatory region sequence-specific DNA binding;…	NA	986	1006	997	0.6997	6.5	GAGCAAAGCAAGAGAAGCUGC&AUAGUUUCUCUUGUUCUGCAC	0	0	NA	NA	NA	4	152.097	3	0.2306	Output/short456/cleaveLand_result/t_plot/ath-miR413_TRINITY_DN2248_c1_g3_i2_997_TPlot.pdf	0	152.097	-Inf	down	5.9991e-35	1.17839e-34
ath-miR413	TRINITY_DN2248_c1_g3_i3	TRINITY_DN2248_c1_g3	NA	NA	GO:0009873|ethylene-activated signaling pathway;GO:0048573|photoperiodism, flowering;GO:0071456|cellular response to hypoxia;GO:0005634|nucleus;GO:0003677|DNA binding;GO:0003700|DNA-binding transcription factor activity	NA	537	557	548	0.6997	6.5	GAGCAAAGCAAGAGAAGCUGC&AUAGUUUCUCUUGUUCUGCAC	1	64.771	4	0.126752	Output/long789/cleaveLand_result/t_plot/ath-miR413_TRINITY_DN2248_c1_g3_i3_548_TPlot.pdf	1	38.0243	4	0.152486	Output/short456/cleaveLand_result/t_plot/ath-miR413_TRINITY_DN2248_c1_g3_i3_548_TPlot.pdf	64.771	38.0243	0.768429	up	0.0083365	0.00847593
ath-miR413	TRINITY_DN724_c0_g1_i20	TRINITY_DN724_c0_g1	NA	NA	GO:0006508|proteolysis;GO:0005739|mitochondrion;GO:0005743|mitochondrial inner membrane;GO:0070469|respirasome;GO:0046872|metal ion binding	NA	982	1002	993	0.717718	5.5	GUGUUGAACACGAGGAACUGU&AUAGUUUCUCUUGUUCUGCAC	0	0	NA	NA	NA	2	76.0485	3	0.182897	Output/short456/cleaveLand_result/t_plot/ath-miR413_TRINITY_DN724_c0_g1_i20_993_TPlot.pdf	0	76.0485	-Inf	down	2.7637e-18	4.06116e-18
ath-miR413	TRINITY_DN724_c0_g1_i22	TRINITY_DN724_c0_g1	NA	NA	GO:0006508|proteolysis;GO:0005739|mitochondrion;GO:0005743|mitochondrial inner membrane;GO:0070469|respirasome;GO:0046872|metal ion binding	NA	982	1002	993	0.717718	5.5	GUGUUGAACACGAGGAACUGU&AUAGUUUCUCUUGUUCUGCAC	0	0	NA	NA	NA	2	76.0485	3	0.18238	Output/short456/cleaveLand_result/t_plot/ath-miR413_TRINITY_DN724_c0_g1_i22_993_TPlot.pdf	0	76.0485	-Inf	down	2.7637e-18	4.06116e-18
ath-miR413	TRINITY_DN8957_c1_g2_i2	TRINITY_DN8957_c1_g2	NA	NA	GO:0007049|cell cycle;GO:0032875|regulation of DNA endoreduplication;GO:0045786|negative regulation of cell cycle;GO:0045839|negative regulation of mitotic nuclear division;GO:0005634|nucleus;GO:0004860|protein kinase inhibitor activity	NA	532	553	544	0.708709	7	CAGCACGAACAAGAGAAGGUGU&AUAGUUUCUCUUGUUC-UGCAC	0	0	NA	NA	NA	5	190.121	3	0.201313	Output/short456/cleaveLand_result/t_plot/ath-miR413_TRINITY_DN8957_c1_g2_i2_544_TPlot.pdf	0	190.121	-Inf	down	2.9642e-43	6.43543e-43
ath-miR414	TRINITY_DN12930_c1_g2_i2	TRINITY_DN12930_c1_g2	NA	NA	GO:0006812|cation transport;GO:0031359|integral component of chloroplast outer membrane;GO:0046930|pore complex;GO:0005216|ion channel activity;GO:0015288|porin activity;GO:0042802|identical protein binding	NA	1418	1437	1428	0.654971	3.5	UGG-GUUGGUGAUGAAGAUGG&UCAUCUUCAUCAUCAUCGUCA	0	0	NA	NA	NA	1	38.0243	4	0.978698	Output/short456/cleaveLand_result/t_plot/ath-miR414_TRINITY_DN12930_c1_g2_i2_1428_TPlot.pdf	0	38.0243	-Inf	down	6.9845e-10	7.47646e-10
ath-miR414	TRINITY_DN12930_c1_g2_i3	TRINITY_DN12930_c1_g2	NA	NA	GO:0006812|cation transport;GO:0031359|integral component of chloroplast outer membrane;GO:0046930|pore complex;GO:0005216|ion channel activity;GO:0015288|porin activity;GO:0042802|identical protein binding	NA	1389	1408	1399	0.654971	3.5	UGG-GUUGGUGAUGAAGAUGG&UCAUCUUCAUCAUCAUCGUCA	0	0	NA	NA	NA	1	38.0243	4	0.977084	Output/short456/cleaveLand_result/t_plot/ath-miR414_TRINITY_DN12930_c1_g2_i3_1399_TPlot.pdf	0	38.0243	-Inf	down	6.9845e-10	7.47646e-10
ath-miR414	TRINITY_DN14944_c0_g1_i1	TRINITY_DN14944_c0_g1	NA	NA	GO:0006457|protein folding;GO:0034605|cellular response to heat;GO:0050821|protein stabilization;GO:0061077|chaperone-mediated protein folding;GO:0005737|cytoplasm;GO:0005829|cytosol;GO:0005886|plasma membrane;GO:0009986|cell surface;GO:0032991|protein-containing complex;GO:0048471|perinuclear region of cytoplasm;GO:0005524|ATP binding;GO:0016887|ATPase activity;GO:0051082|unfolded protein binding	ko04141;ko04626	765	785	776	0.701754	6.5	CGAUGAUGAGGAUGAGGAGGA&UCAUCUUCAUCAUCAUCGUCA	0	0	NA	NA	NA	2	76.0485	3	0.977753	Output/short456/cleaveLand_result/t_plot/ath-miR414_TRINITY_DN14944_c0_g1_i1_776_TPlot.pdf	0	76.0485	-Inf	down	2.7637e-18	4.06116e-18
ath-miR414	TRINITY_DN14944_c0_g1_i10	TRINITY_DN14944_c0_g1	NA	NA	GO:0006457|protein folding;GO:0034605|cellular response to heat;GO:0050821|protein stabilization;GO:0061077|chaperone-mediated protein folding;GO:0005737|cytoplasm;GO:0005829|cytosol;GO:0005886|plasma membrane;GO:0009986|cell surface;GO:0032991|protein-containing complex;GO:0048471|perinuclear region of cytoplasm;GO:0005524|ATP binding;GO:0016887|ATPase activity;GO:0051082|unfolded protein binding	ko04141;ko04626	441	461	452	0.701754	6.5	CGAUGAUGAGGAUGAGGAGGA&UCAUCUUCAUCAUCAUCGUCA	0	0	NA	NA	NA	2	76.0485	3	0.979315	Output/short456/cleaveLand_result/t_plot/ath-miR414_TRINITY_DN14944_c0_g1_i10_452_TPlot.pdf	0	76.0485	-Inf	down	2.7637e-18	4.06116e-18
ath-miR414	TRINITY_DN14944_c0_g1_i13	TRINITY_DN14944_c0_g1	NA	NA	GO:0006457|protein folding;GO:0034605|cellular response to heat;GO:0050821|protein stabilization;GO:0005737|cytoplasm;GO:0005829|cytosol;GO:0005886|plasma membrane;GO:0009986|cell surface;GO:0032991|protein-containing complex;GO:0048471|perinuclear region of cytoplasm;GO:0005524|ATP binding;GO:0051082|unfolded protein binding	ko04141;ko04626	1893	1913	1904	0.701754	6.5	CGAUGAUGAGGAUGAGGAGGA&UCAUCUUCAUCAUCAUCGUCA	0	0	NA	NA	NA	5	190.121	3	0.979144	Output/short456/cleaveLand_result/t_plot/ath-miR414_TRINITY_DN14944_c0_g1_i13_1904_TPlot.pdf	0	190.121	-Inf	down	2.9642e-43	6.43543e-43
ath-miR414	TRINITY_DN14944_c0_g1_i3	TRINITY_DN14944_c0_g1	NA	NA	GO:0006457|protein folding;GO:0034605|cellular response to heat;GO:0050821|protein stabilization;GO:0061077|chaperone-mediated protein folding;GO:0005737|cytoplasm;GO:0005829|cytosol;GO:0005886|plasma membrane;GO:0009986|cell surface;GO:0032991|protein-containing complex;GO:0048471|perinuclear region of cytoplasm;GO:0005524|ATP binding;GO:0016887|ATPase activity;GO:0051082|unfolded protein binding	ko04141;ko04626	800	820	811	0.701754	6.5	CGAUGAUGAGGAUGAGGAGGA&UCAUCUUCAUCAUCAUCGUCA	0	0	NA	NA	NA	8	304.194	2	0.908901	Output/short456/cleaveLand_result/t_plot/ath-miR414_TRINITY_DN14944_c0_g1_i3_811_TPlot.pdf	0	304.194	-Inf	down	3.9261e-68	1.47708e-67
ath-miR414	TRINITY_DN14944_c0_g1_i6	TRINITY_DN14944_c0_g1	NA	NA	GO:0006457|protein folding;GO:0034605|cellular response to heat;GO:0050821|protein stabilization;GO:0005737|cytoplasm;GO:0005829|cytosol;GO:0005886|plasma membrane;GO:0009986|cell surface;GO:0032991|protein-containing complex;GO:0048471|perinuclear region of cytoplasm;GO:0005524|ATP binding;GO:0051082|unfolded protein binding	ko04141;ko04626	801	821	812	0.701754	6.5	CGAUGAUGAGGAUGAGGAGGA&UCAUCUUCAUCAUCAUCGUCA	0	0	NA	NA	NA	1	38.0243	4	0.911765	Output/short456/cleaveLand_result/t_plot/ath-miR414_TRINITY_DN14944_c0_g1_i6_812_TPlot.pdf	0	38.0243	-Inf	down	6.9845e-10	7.47646e-10
ath-miR414	TRINITY_DN1676_c3_g1_i1	TRINITY_DN1676_c3_g1	NA	NA	NA	NA	1941	1962	1953	0.672515	4	UGAGCGAAGAUGAUGAAGACGA&UCAUCUUCAUCAUCAUCG-UCA	2	129.542	3	0.9935	Output/long789/cleaveLand_result/t_plot/ath-miR414_TRINITY_DN1676_c3_g1_i1_1953_TPlot.pdf	0	0	NA	NA	NA	129.542	0	Inf	up	5.1393e-30	9.14621e-30
ath-miR414	TRINITY_DN17135_c0_g1_i16	TRINITY_DN17135_c0_g1	NA	NA	GO:0006897|endocytosis;GO:0009740|gibberellic acid mediated signaling pathway;GO:0009908|flower development;GO:0010476|gibberellin mediated signaling pathway;GO:0018105|peptidyl-serine phosphorylation;GO:0040008|regulation of growth;GO:0048586|regulation of long-day photoperiodism, flowering;GO:0005634|nucleus;GO:0005737|cytoplasm;GO:0004674|protein serine/threonine kinase activity;GO:0005524|ATP…	NA	1800	1821	1812	0.733918	6.5	UGACGAUGGAGGAAGAAGAUGA&UCAUCUUCAUC-AUCAUCGUCA	0	0	NA	NA	NA	1	38.0243	4	0.809565	Output/short456/cleaveLand_result/t_plot/ath-miR414_TRINITY_DN17135_c0_g1_i16_1812_TPlot.pdf	0	38.0243	-Inf	down	6.9845e-10	7.47646e-10
ath-miR414	TRINITY_DN17135_c0_g1_i6	TRINITY_DN17135_c0_g1	NA	NA	GO:0006897|endocytosis;GO:0009740|gibberellic acid mediated signaling pathway;GO:0009908|flower development;GO:0010476|gibberellin mediated signaling pathway;GO:0018105|peptidyl-serine phosphorylation;GO:0040008|regulation of growth;GO:0048586|regulation of long-day photoperiodism, flowering;GO:0005634|nucleus;GO:0005737|cytoplasm;GO:0004674|protein serine/threonine kinase activity;GO:0005524|ATP…	NA	1788	1809	1800	0.733918	6.5	UGACGAUGGAGGAAGAAGAUGA&UCAUCUUCAUC-AUCAUCGUCA	0	0	NA	NA	NA	1	38.0243	4	0.8082	Output/short456/cleaveLand_result/t_plot/ath-miR414_TRINITY_DN17135_c0_g1_i6_1800_TPlot.pdf	0	38.0243	-Inf	down	6.9845e-10	7.47646e-10
ath-miR414	TRINITY_DN17135_c0_g1_i9	TRINITY_DN17135_c0_g1	NA	NA	GO:0006897|endocytosis;GO:0009740|gibberellic acid mediated signaling pathway;GO:0009908|flower development;GO:0010476|gibberellin mediated signaling pathway;GO:0018105|peptidyl-serine phosphorylation;GO:0040008|regulation of growth;GO:0048586|regulation of long-day photoperiodism, flowering;GO:0005634|nucleus;GO:0005737|cytoplasm;GO:0004674|protein serine/threonine kinase activity;GO:0005524|ATP…	NA	1798	1819	1810	0.733918	6.5	UGACGAUGGAGGAAGAAGAUGA&UCAUCUUCAUC-AUCAUCGUCA	0	0	NA	NA	NA	1	38.0243	4	0.812415	Output/short456/cleaveLand_result/t_plot/ath-miR414_TRINITY_DN17135_c0_g1_i9_1810_TPlot.pdf	0	38.0243	-Inf	down	6.9845e-10	7.47646e-10
ath-miR414	TRINITY_DN2142_c0_g1_i14	TRINITY_DN2142_c0_g1	NA	NA	GO:0006457|protein folding;GO:0034605|cellular response to heat;GO:0050821|protein stabilization;GO:0005737|cytoplasm;GO:0005829|cytosol;GO:0005886|plasma membrane;GO:0009986|cell surface;GO:0032991|protein-containing complex;GO:0048471|perinuclear region of cytoplasm;GO:0005524|ATP binding;GO:0051082|unfolded protein binding	ko04141;ko04626	16	36	27	0.701754	6.5	CGAUGAUGAGGAUGAGGAGGA&UCAUCUUCAUCAUCAUCGUCA	0	0	NA	NA	NA	3	114.073	3	0.978309	Output/short456/cleaveLand_result/t_plot/ath-miR414_TRINITY_DN2142_c0_g1_i14_27_TPlot.pdf	0	114.073	-Inf	down	1.252e-26	2.10489e-26
ath-miR414	TRINITY_DN2142_c0_g1_i20	TRINITY_DN2142_c0_g1	NA	NA	GO:0006457|protein folding;GO:0034605|cellular response to heat;GO:0050821|protein stabilization;GO:0005737|cytoplasm;GO:0005829|cytosol;GO:0005886|plasma membrane;GO:0009986|cell surface;GO:0032991|protein-containing complex;GO:0048471|perinuclear region of cytoplasm;GO:0005524|ATP binding;GO:0051082|unfolded protein binding	ko04141;ko04626	16	36	27	0.701754	6.5	CGAUGAUGAGGAUGAGGAGGA&UCAUCUUCAUCAUCAUCGUCA	0	0	NA	NA	NA	2	76.0485	3	0.980609	Output/short456/cleaveLand_result/t_plot/ath-miR414_TRINITY_DN2142_c0_g1_i20_27_TPlot.pdf	0	76.0485	-Inf	down	2.7637e-18	4.06116e-18
ath-miR414	TRINITY_DN23184_c0_g1_i3	TRINITY_DN23184_c0_g1	NA	NA	GO:0032259|methylation;GO:0005768|endosome;GO:0005794|Golgi apparatus;GO:0005797|Golgi medial cisterna;GO:0005802|trans-Golgi network;GO:0005886|plasma membrane;GO:0008168|methyltransferase activity	NA	1243	1263	1254	0.815789	5	UGAUGAUGAUGAUGUUGAUGG&UCAUCUUCAUCAUCAUCGUCA	0	0	NA	NA	NA	1	38.0243	4	0.437463	Output/short456/cleaveLand_result/t_plot/ath-miR414_TRINITY_DN23184_c0_g1_i3_1254_TPlot.pdf	0	38.0243	-Inf	down	6.9845e-10	7.47646e-10
ath-miR414	TRINITY_DN23184_c0_g1_i4	TRINITY_DN23184_c0_g1	NA	NA	GO:0032259|methylation;GO:0005768|endosome;GO:0005794|Golgi apparatus;GO:0005797|Golgi medial cisterna;GO:0005802|trans-Golgi network;GO:0005886|plasma membrane;GO:0008168|methyltransferase activity	NA	1243	1263	1254	0.815789	5	UGAUGAUGAUGAUGUUGAUGG&UCAUCUUCAUCAUCAUCGUCA	0	0	NA	NA	NA	1	38.0243	4	0.432981	Output/short456/cleaveLand_result/t_plot/ath-miR414_TRINITY_DN23184_c0_g1_i4_1254_TPlot.pdf	0	38.0243	-Inf	down	6.9845e-10	7.47646e-10
ath-miR414	TRINITY_DN2451_c1_g1_i8	TRINITY_DN2451_c1_g1	NA	NA	GO:0009624|response to nematode;GO:0005886|plasma membrane;GO:0009506|plasmodesma;GO:0009536|plastid;GO:0016021|integral component of membrane;GO:0043231|intracellular membrane-bounded organelle;GO:0005388|calcium transmembrane transporter activity, phosphorylative mechanism;GO:0005516|calmodulin binding;GO:0005524|ATP binding;GO:0019829|ATPase-coupled cation transmembrane transporter activity;GO…	NA	2080	2102	2091	0.707602	6	UGAGGAUGAUGGUUGAAGAUUGA&UCA-UCUUCA-UCAUCAUCGUCA	1	64.771	4	0.840454	Output/long789/cleaveLand_result/t_plot/ath-miR414_TRINITY_DN2451_c1_g1_i8_2091_TPlot.pdf	0	0	NA	NA	NA	64.771	0	Inf	up	8.4037e-16	1.0516e-15
ath-miR414	TRINITY_DN25016_c0_g2_i2	TRINITY_DN25016_c0_g2	NA	NA	GO:0005886|plasma membrane;GO:0016021|integral component of membrane;GO:0005524|ATP binding;GO:0106310|protein serine kinase activity;GO:0106311|protein threonine kinase activity	NA	611	631	622	0.725146	6	GAACGAUGAUGAUGAGAGUGA&UCAUCUUCAUCAUCAUCGUCA	13	842.023	2	0.812022	Output/long789/cleaveLand_result/t_plot/ath-miR414_TRINITY_DN25016_c0_g2_i2_622_TPlot.pdf	7	266.17	2	0.843584	Output/short456/cleaveLand_result/t_plot/ath-miR414_TRINITY_DN25016_c0_g2_i2_622_TPlot.pdf	842.023	266.17	1.66151	up	4.455e-67	1.66522e-66
ath-miR414	TRINITY_DN2567_c1_g2_i1	TRINITY_DN2567_c1_g2	NA	NA	NA	NA	489	509	500	0.704678	4	AGACGAGGAUUAUGAAGAUGA&UCAUCUUCAUCAUCAUCGUCA	4	259.084	3	0.972559	Output/long789/cleaveLand_result/t_plot/ath-miR414_TRINITY_DN2567_c1_g2_i1_500_TPlot.pdf	0	0	NA	NA	NA	259.084	0	Inf	up	2.672e-58	8.29613e-58
ath-miR414	TRINITY_DN2695_c0_g2_i3	TRINITY_DN2695_c0_g2	NA	NA	GO:0006412|translation;GO:0006414|translational elongation;GO:0005737|cytoplasm;GO:0003746|translation elongation factor activity;GO:0003924|GTPase activity;GO:0005525|GTP binding	ko03013	1391	1413	1404	0.660819	4.5	UGAUGCUGGUAUGGUGAAGAUGA&UCAUCUUCAUCAU--CAUCGUCA	9	582.939	3	0.996188	Output/long789/cleaveLand_result/t_plot/ath-miR414_TRINITY_DN2695_c0_g2_i3_1404_TPlot.pdf	0	0	NA	NA	NA	582.939	0	Inf	up	0	0
ath-miR414	TRINITY_DN2695_c0_g2_i5	TRINITY_DN2695_c0_g2	NA	NA	GO:0006412|translation;GO:0006414|translational elongation;GO:0005737|cytoplasm;GO:0003746|translation elongation factor activity;GO:0003924|GTPase activity;GO:0005525|GTP binding	ko03013	1391	1413	1404	0.660819	4.5	UGAUGCUGGUAUGGUGAAGAUGA&UCAUCUUCAUCAU--CAUCGUCA	21	1360.19	2	0.958363	Output/long789/cleaveLand_result/t_plot/ath-miR414_TRINITY_DN2695_c0_g2_i5_1404_TPlot.pdf	0	0	NA	NA	NA	1360.19	0	Inf	up	0	0
ath-miR414	TRINITY_DN3297_c0_g1_i5	TRINITY_DN3297_c0_g1	NA	NA	NA	NA	595	615	606	0.850877	2	UGAAGAUGAUGAUGGAGAUGA&UCAUCUUCAUCAUCAUCGUCA	0	0	NA	NA	NA	17	646.412	2	0.256627	Output/short456/cleaveLand_result/t_plot/ath-miR414_TRINITY_DN3297_c0_g1_i5_606_TPlot.pdf	0	646.412	-Inf	down	0	0
ath-miR414	TRINITY_DN3297_c0_g2_i1	TRINITY_DN3297_c0_g2	NA	NA	NA	NA	324	344	335	0.871345	3	UGACGAUGAUGAUGAUGAUGU&UCAUCUUCAUCAUCAUCGUCA	19	1230.65	2	0.146263	Output/long789/cleaveLand_result/t_plot/ath-miR414_TRINITY_DN3297_c0_g2_i1_335_TPlot.pdf	0	0	NA	NA	NA	1230.65	0	Inf	up	0	0
ath-miR414	TRINITY_DN3297_c0_g2_i2	TRINITY_DN3297_c0_g2	NA	NA	NA	NA	324	344	335	0.871345	3	UGACGAUGAUGAUGAUGAUGU&UCAUCUUCAUCAUCAUCGUCA	18	1165.88	2	0.143564	Output/long789/cleaveLand_result/t_plot/ath-miR414_TRINITY_DN3297_c0_g2_i2_335_TPlot.pdf	0	0	NA	NA	NA	1165.88	0	Inf	up	0	0
ath-miR414	TRINITY_DN3357_c0_g1_i1	TRINITY_DN3357_c0_g1	NA	NA	NA	NA	681	701	692	0.807018	5	UGAUGGUGAUGGUGACGGUGA&UCAUCUUCAUCAUCAUCGUCA	1	64.771	4	0.40974	Output/long789/cleaveLand_result/t_plot/ath-miR414_TRINITY_DN3357_c0_g1_i1_692_TPlot.pdf	0	0	NA	NA	NA	64.771	0	Inf	up	8.4037e-16	1.0516e-15
ath-miR414	TRINITY_DN3357_c0_g1_i17	TRINITY_DN3357_c0_g1	NA	NA	NA	NA	101	121	112	0.807018	5	UGAUGGUGAUGGUGACGGUGA&UCAUCUUCAUCAUCAUCGUCA	1	64.771	4	0.408011	Output/long789/cleaveLand_result/t_plot/ath-miR414_TRINITY_DN3357_c0_g1_i17_112_TPlot.pdf	0	0	NA	NA	NA	64.771	0	Inf	up	8.4037e-16	1.0516e-15
ath-miR414	TRINITY_DN3357_c0_g1_i22	TRINITY_DN3357_c0_g1	NA	NA	NA	NA	681	701	692	0.807018	5	UGAUGGUGAUGGUGACGGUGA&UCAUCUUCAUCAUCAUCGUCA	1	64.771	4	0.409356	Output/long789/cleaveLand_result/t_plot/ath-miR414_TRINITY_DN3357_c0_g1_i22_692_TPlot.pdf	0	0	NA	NA	NA	64.771	0	Inf	up	8.4037e-16	1.0516e-15
ath-miR414	TRINITY_DN3357_c0_g1_i5	TRINITY_DN3357_c0_g1	NA	NA	NA	NA	650	670	661	0.807018	5	UGAUGGUGAUGGUGACGGUGA&UCAUCUUCAUCAUCAUCGUCA	2	129.542	3	0.621847	Output/long789/cleaveLand_result/t_plot/ath-miR414_TRINITY_DN3357_c0_g1_i5_661_TPlot.pdf	0	0	NA	NA	NA	129.542	0	Inf	up	5.1393e-30	9.14621e-30
ath-miR414	TRINITY_DN3601_c0_g1_i21	TRINITY_DN3601_c0_g1	NA	NA	NA	NA	4175	4195	4186	0.74269	7	UGAUGGUGAAGGUGAGGGUGU&UCAUCUUCAUCAUCAUCGUCA	0	0	NA	NA	NA	2	76.0485	3	0.907935	Output/short456/cleaveLand_result/t_plot/ath-miR414_TRINITY_DN3601_c0_g1_i21_4186_TPlot.pdf	0	76.0485	-Inf	down	2.7637e-18	4.06116e-18
ath-miR414	TRINITY_DN4287_c0_g2_i1	TRINITY_DN4287_c0_g2	NA	NA	GO:0006260|DNA replication;GO:0006281|DNA repair;GO:0005634|nucleus;GO:0005694|chromosome;GO:0003677|DNA binding	NA	1612	1632	1623	0.657895	6.5	AGAGAGUGAUGAGGAGGAUGA&UCAUCUUCAUCAUCAUCGUCA	3	194.313	3	0.996731	Output/long789/cleaveLand_result/t_plot/ath-miR414_TRINITY_DN4287_c0_g2_i1_1623_TPlot.pdf	0	0	NA	NA	NA	194.313	0	Inf	up	3.6042e-44	8.09893e-44
ath-miR414	TRINITY_DN4287_c0_g2_i3	TRINITY_DN4287_c0_g2	NA	NA	GO:0006260|DNA replication;GO:0006281|DNA repair;GO:0005634|nucleus;GO:0005694|chromosome;GO:0003677|DNA binding	NA	1612	1632	1623	0.657895	6.5	AGAGAGUGAUGAGGAGGAUGA&UCAUCUUCAUCAUCAUCGUCA	4	259.084	3	0.996708	Output/long789/cleaveLand_result/t_plot/ath-miR414_TRINITY_DN4287_c0_g2_i3_1623_TPlot.pdf	0	0	NA	NA	NA	259.084	0	Inf	up	2.672e-58	8.29613e-58
ath-miR414	TRINITY_DN4464_c0_g1_i2	TRINITY_DN4464_c0_g1	NA	NA	GO:0009873|ethylene-activated signaling pathway;GO:0010087|phloem or xylem histogenesis;GO:0010200|response to chitin;GO:0010928|regulation of auxin mediated signaling pathway;GO:0050832|defense response to fungus;GO:0051301|cell division;GO:0062211|root regeneration;GO:0090357|regulation of tryptophan metabolic process;GO:0005634|nucleus;GO:0003677|DNA binding;GO:0003700|DNA-binding transcriptio…	NA	625	646	637	0.681287	7	UGAACGACGGUGGUGGGGGUGG&UCAUCUUCAUCAUCAUCGU-CA	5	323.855	3	0.990443	Output/long789/cleaveLand_result/t_plot/ath-miR414_TRINITY_DN4464_c0_g1_i2_637_TPlot.pdf	2	76.0485	3	0.992297	Output/short456/cleaveLand_result/t_plot/ath-miR414_TRINITY_DN4464_c0_g1_i2_637_TPlot.pdf	323.855	76.0485	2.09036	up	2.8495e-35	5.84578e-35
ath-miR414	TRINITY_DN4464_c0_g1_i5	TRINITY_DN4464_c0_g1	NA	NA	GO:0009873|ethylene-activated signaling pathway;GO:0010087|phloem or xylem histogenesis;GO:0010200|response to chitin;GO:0010928|regulation of auxin mediated signaling pathway;GO:0050832|defense response to fungus;GO:0051301|cell division;GO:0062211|root regeneration;GO:0090357|regulation of tryptophan metabolic process;GO:0005634|nucleus;GO:0003677|DNA binding;GO:0003700|DNA-binding transcriptio…	NA	625	646	637	0.681287	7	UGAACGACGGUGGUGGGGGUGG&UCAUCUUCAUCAUCAUCGU-CA	5	323.855	3	0.990244	Output/long789/cleaveLand_result/t_plot/ath-miR414_TRINITY_DN4464_c0_g1_i5_637_TPlot.pdf	2	76.0485	3	0.992129	Output/short456/cleaveLand_result/t_plot/ath-miR414_TRINITY_DN4464_c0_g1_i5_637_TPlot.pdf	323.855	76.0485	2.09036	up	2.8495e-35	5.84578e-35
ath-miR414	TRINITY_DN4555_c1_g1_i2	TRINITY_DN4555_c1_g1	NA	NA	GO:0006355|regulation of transcription, DNA-templated;GO:0006952|defense response;GO:0031347|regulation of defense response;GO:2000022|regulation of jasmonic acid mediated signaling pathway;GO:0005634|nucleus;GO:0000976|transcription regulatory region sequence-specific DNA binding;GO:0003700|DNA-binding transcription factor activity;GO:0043565|sequence-specific DNA binding;GO:0046983|protein dime…	NA	1961	1980	1971	0.657895	6.5	AGAAGGUGA-GAUGAGGGUGA&UCAUCUUCAUCAUCAUCGUCA	4	259.084	3	0.996329	Output/long789/cleaveLand_result/t_plot/ath-miR414_TRINITY_DN4555_c1_g1_i2_1971_TPlot.pdf	0	0	NA	NA	NA	259.084	0	Inf	up	2.672e-58	8.29613e-58
ath-miR414	TRINITY_DN4555_c1_g1_i3	TRINITY_DN4555_c1_g1	NA	NA	GO:0006355|regulation of transcription, DNA-templated;GO:0006952|defense response;GO:0031347|regulation of defense response;GO:2000022|regulation of jasmonic acid mediated signaling pathway;GO:0005634|nucleus;GO:0000976|transcription regulatory region sequence-specific DNA binding;GO:0003700|DNA-binding transcription factor activity;GO:0043565|sequence-specific DNA binding;GO:0046983|protein dime…	NA	1954	1973	1964	0.657895	6.5	AGAAGGUGA-GAUGAGGGUGA&UCAUCUUCAUCAUCAUCGUCA	2	129.542	3	0.996451	Output/long789/cleaveLand_result/t_plot/ath-miR414_TRINITY_DN4555_c1_g1_i3_1964_TPlot.pdf	0	0	NA	NA	NA	129.542	0	Inf	up	5.1393e-30	9.14621e-30
ath-miR414	TRINITY_DN4631_c1_g2_i1	TRINITY_DN4631_c1_g2	NA	NA	GO:0005886|plasma membrane;GO:0016021|integral component of membrane;GO:0005524|ATP binding;GO:0106310|protein serine kinase activity;GO:0106311|protein threonine kinase activity	NA	913	933	924	0.959064	1.5	GGAUGAUGAUGAUGAAGAUGA&UCAUCUUCAUCAUCAUCGUCA	0	0	NA	NA	NA	1	38.0243	4	0.0196424	Output/short456/cleaveLand_result/t_plot/ath-miR414_TRINITY_DN4631_c1_g2_i1_924_TPlot.pdf	0	38.0243	-Inf	down	6.9845e-10	7.47646e-10
ath-miR414	TRINITY_DN7400_c3_g1_i16	TRINITY_DN7400_c3_g1	NA	NA	GO:0002237|response to molecule of bacterial origin;GO:0009611|response to wounding;GO:0009751|response to salicylic acid;GO:0010200|response to chitin;GO:0031347|regulation of defense response;GO:0042742|defense response to bacterium;GO:0045892|negative regulation of transcription, DNA-templated;GO:0050832|defense response to fungus;GO:0005634|nucleus;GO:0003700|DNA-binding transcription factor …	NA	211	231	222	0.769006	5	UUACGAUGAUGAUGAGGAGGA&UCAUCUUCAUCAUCAUCGUCA	3	194.313	3	0.801613	Output/long789/cleaveLand_result/t_plot/ath-miR414_TRINITY_DN7400_c3_g1_i16_222_TPlot.pdf	0	0	NA	NA	NA	194.313	0	Inf	up	3.6042e-44	8.09893e-44
ath-miR414	TRINITY_DN7400_c3_g1_i2	TRINITY_DN7400_c3_g1	NA	NA	GO:0002237|response to molecule of bacterial origin;GO:0009611|response to wounding;GO:0009751|response to salicylic acid;GO:0010200|response to chitin;GO:0031347|regulation of defense response;GO:0042742|defense response to bacterium;GO:0045892|negative regulation of transcription, DNA-templated;GO:0050832|defense response to fungus;GO:0005634|nucleus;GO:0003700|DNA-binding transcription factor …	NA	211	231	222	0.769006	5	UUACGAUGAUGAUGAGGAGGA&UCAUCUUCAUCAUCAUCGUCA	1	64.771	4	0.582448	Output/long789/cleaveLand_result/t_plot/ath-miR414_TRINITY_DN7400_c3_g1_i2_222_TPlot.pdf	0	0	NA	NA	NA	64.771	0	Inf	up	8.4037e-16	1.0516e-15
ath-miR414	TRINITY_DN7400_c3_g1_i5	TRINITY_DN7400_c3_g1	NA	NA	GO:0002237|response to molecule of bacterial origin;GO:0009611|response to wounding;GO:0009751|response to salicylic acid;GO:0010200|response to chitin;GO:0031347|regulation of defense response;GO:0042742|defense response to bacterium;GO:0045892|negative regulation of transcription, DNA-templated;GO:0050832|defense response to fungus;GO:0005634|nucleus;GO:0003700|DNA-binding transcription factor …	NA	211	231	222	0.769006	5	UUACGAUGAUGAUGAGGAGGA&UCAUCUUCAUCAUCAUCGUCA	4	259.084	2	0.604836	Output/long789/cleaveLand_result/t_plot/ath-miR414_TRINITY_DN7400_c3_g1_i5_222_TPlot.pdf	0	0	NA	NA	NA	259.084	0	Inf	up	2.672e-58	8.29613e-58
ath-miR414	TRINITY_DN7616_c0_g1_i13	TRINITY_DN7616_c0_g1	NA	NA	GO:0006334|nucleosome assembly;GO:0005634|nucleus;GO:0005737|cytoplasm	NA	464	484	475	0.75731	4	CGACGAGGAUGAGGAAGAUGA&UCAUCUUCAUCAUCAUCGUCA	0	0	NA	NA	NA	1	38.0243	4	0.705597	Output/short456/cleaveLand_result/t_plot/ath-miR414_TRINITY_DN7616_c0_g1_i13_475_TPlot.pdf	0	38.0243	-Inf	down	6.9845e-10	7.47646e-10
ath-miR414	TRINITY_DN7616_c0_g1_i14	TRINITY_DN7616_c0_g1	NA	NA	GO:0006334|nucleosome assembly;GO:0005634|nucleus;GO:0005737|cytoplasm	NA	464	484	475	0.75731	4	CGACGAGGAUGAGGAAGAUGA&UCAUCUUCAUCAUCAUCGUCA	0	0	NA	NA	NA	1	38.0243	4	0.704192	Output/short456/cleaveLand_result/t_plot/ath-miR414_TRINITY_DN7616_c0_g1_i14_475_TPlot.pdf	0	38.0243	-Inf	down	6.9845e-10	7.47646e-10
ath-miR414	TRINITY_DN7616_c0_g1_i9	TRINITY_DN7616_c0_g1	NA	NA	GO:0006334|nucleosome assembly;GO:0005634|nucleus;GO:0005737|cytoplasm	NA	464	484	475	0.75731	4	CGACGAGGAUGAGGAAGAUGA&UCAUCUUCAUCAUCAUCGUCA	0	0	NA	NA	NA	1	38.0243	4	0.710002	Output/short456/cleaveLand_result/t_plot/ath-miR414_TRINITY_DN7616_c0_g1_i9_475_TPlot.pdf	0	38.0243	-Inf	down	6.9845e-10	7.47646e-10
ath-miR414	TRINITY_DN7616_c0_g2_i1	TRINITY_DN7616_c0_g2	NA	NA	GO:0006334|nucleosome assembly;GO:0005634|nucleus;GO:0005737|cytoplasm	NA	443	466	454	0.865497	7	AGACGAUGAUGAUGAAAUAGAUGA&UCAUCU---UCAUCAUCAUCGUCA	0	0	NA	NA	NA	35	1330.85	2	0.19049	Output/short456/cleaveLand_result/t_plot/ath-miR414_TRINITY_DN7616_c0_g2_i1_454_TPlot.pdf	0	1330.85	-Inf	down	0	0
ath-miR414	TRINITY_DN79_c0_g2_i1	TRINITY_DN79_c0_g2	NA	NA	GO:0042393|histone binding	NA	989	1009	1000	0.72807	4.5	UGAUGUUGAAGAUGAGGAUGA&UCAUCUUCAUCAUCAUCGUCA	0	0	NA	NA	NA	17	646.412	3	0.944455	Output/short456/cleaveLand_result/t_plot/ath-miR414_TRINITY_DN79_c0_g2_i1_1000_TPlot.pdf	0	646.412	-Inf	down	0	0
ath-miR414	TRINITY_DN8310_c0_g2_i1	TRINITY_DN8310_c0_g2	NA	NA	GO:0006357|regulation of transcription by RNA polymerase II;GO:0034605|cellular response to heat;GO:0005634|nucleus;GO:0000978|RNA polymerase II cis-regulatory region sequence-specific DNA binding;GO:0003700|DNA-binding transcription factor activity	NA	571	591	582	0.666667	5	GGAGGAAGAUGAUGAAGACGA&UCAUCUUCAUCAUCAUCGUCA	0	0	NA	NA	NA	6	228.146	3	0.995568	Output/short456/cleaveLand_result/t_plot/ath-miR414_TRINITY_DN8310_c0_g2_i1_582_TPlot.pdf	0	228.146	-Inf	down	1.4931e-51	4.44467e-51
ath-miR414	TRINITY_DN8310_c0_g2_i2	TRINITY_DN8310_c0_g2	NA	NA	GO:0006357|regulation of transcription by RNA polymerase II;GO:0034605|cellular response to heat;GO:0005634|nucleus;GO:0000978|RNA polymerase II cis-regulatory region sequence-specific DNA binding;GO:0003700|DNA-binding transcription factor activity	NA	492	512	503	0.666667	5	GGAGGAAGAUGAUGAAGACGA&UCAUCUUCAUCAUCAUCGUCA	0	0	NA	NA	NA	5	190.121	3	0.995861	Output/short456/cleaveLand_result/t_plot/ath-miR414_TRINITY_DN8310_c0_g2_i2_503_TPlot.pdf	0	190.121	-Inf	down	2.9642e-43	6.43543e-43
ath-miR414	TRINITY_DN851_c0_g1_i10	TRINITY_DN851_c0_g1	NA	NA	GO:0016567|protein ubiquitination;GO:0090378|seed trichome elongation;GO:0005737|cytoplasm;GO:0004842|ubiquitin-protein transferase activity;GO:0046872|metal ion binding;GO:0061630|ubiquitin protein ligase activity	NA	648	668	659	0.710526	7	UGAUGGUGAUGGUGAUGAUAA&UCAUCUUCAUCAUCAUCGUCA	3	194.313	3	0.964512	Output/long789/cleaveLand_result/t_plot/ath-miR414_TRINITY_DN851_c0_g1_i10_659_TPlot.pdf	0	0	NA	NA	NA	194.313	0	Inf	up	3.6042e-44	8.09893e-44
ath-miR5658	TRINITY_DN11502_c0_g1_i8	TRINITY_DN11502_c0_g1	NA	NA	GO:0005615|extracellular space;GO:0048046|apoplast	NA	583	606	597	0.796053	6.5	GAUCAUCCACGUCGUCAUCAUCAU&AUGAUGAUGAUGAU---GAUGAAA	0	0	NA	NA	NA	9	342.218	3	0.879506	Output/short456/cleaveLand_result/t_plot/ath-miR5658_TRINITY_DN11502_c0_g1_i8_597_TPlot.pdf	0	342.218	-Inf	down	2.0371e-76	8.65019e-76
ath-miR5658	TRINITY_DN126_c0_g2_i1	TRINITY_DN126_c0_g2	NA	NA	GO:0016471|vacuolar proton-transporting V-type ATPase complex;GO:0008553|proton-exporting ATPase activity, phosphorylative mechanism	ko00190;ko01100;ko04145	36	55	46	0.779605	5	CCUCAUCA-CAUCGUCAUCAA&AUGAUGAUGAUGAUGAUGAAA	24	1554.5	2	0.746044	Output/long789/cleaveLand_result/t_plot/ath-miR5658_TRINITY_DN126_c0_g2_i1_46_TPlot.pdf	26	988.631	2	0.781576	Output/short456/cleaveLand_result/t_plot/ath-miR5658_TRINITY_DN126_c0_g2_i1_46_TPlot.pdf	1554.5	988.631	0.652951	up	2.9635e-29	5.26591e-29
ath-miR5658	TRINITY_DN1524_c0_g1_i1	TRINITY_DN1524_c0_g1	NA	NA	GO:0005886|plasma membrane;GO:0016021|integral component of membrane;GO:0005524|ATP binding;GO:0106310|protein serine kinase activity;GO:0106311|protein threonine kinase activity	NA	707	727	718	0.667763	6.5	CGUCAUCGUCCUCAGCAUCAU&AUGAUGAUGAUGAUGAUGAAA	0	0	NA	NA	NA	12	456.291	2	0.970058	Output/short456/cleaveLand_result/t_plot/ath-miR5658_TRINITY_DN1524_c0_g1_i1_718_TPlot.pdf	0	456.291	-Inf	down	0	0
ath-miR5658	TRINITY_DN1524_c0_g1_i12	TRINITY_DN1524_c0_g1	NA	NA	GO:0071456|cellular response to hypoxia;GO:0005886|plasma membrane;GO:0016021|integral component of membrane;GO:0046872|metal ion binding	NA	339	359	350	0.667763	6.5	CGUCAUCGUCCUCAGCAUCAU&AUGAUGAUGAUGAUGAUGAAA	0	0	NA	NA	NA	4	152.097	3	0.996599	Output/short456/cleaveLand_result/t_plot/ath-miR5658_TRINITY_DN1524_c0_g1_i12_350_TPlot.pdf	0	152.097	-Inf	down	5.9991e-35	1.17839e-34
ath-miR5658	TRINITY_DN1524_c0_g1_i2	TRINITY_DN1524_c0_g1	NA	NA	GO:0071456|cellular response to hypoxia;GO:0005886|plasma membrane;GO:0016021|integral component of membrane;GO:0046872|metal ion binding	NA	875	895	886	0.667763	6.5	CGUCAUCGUCCUCAGCAUCAU&AUGAUGAUGAUGAUGAUGAAA	0	0	NA	NA	NA	5	190.121	3	0.99668	Output/short456/cleaveLand_result/t_plot/ath-miR5658_TRINITY_DN1524_c0_g1_i2_886_TPlot.pdf	0	190.121	-Inf	down	2.9642e-43	6.43543e-43
ath-miR5658	TRINITY_DN15478_c0_g1_i1	TRINITY_DN15478_c0_g1	NA	NA	GO:0006612|protein targeting to membrane;GO:0006886|intracellular protein transport;GO:0006887|exocytosis;GO:0006906|vesicle fusion;GO:0006952|defense response;GO:0009620|response to fungus;GO:0009737|response to abscisic acid;GO:0010119|regulation of stomatal movement;GO:0010148|transpiration;GO:0016192|vesicle-mediated transport;GO:0031348|negative regulation of defense response;GO:0048278|vesi…	ko04130	1336	1356	1347	0.809211	5	GCUCAUCAUCAUCGCCAUCAU&AUGAUGAUGAUGAUGAUGAAA	0	0	NA	NA	NA	10	380.243	3	0.846046	Output/short456/cleaveLand_result/t_plot/ath-miR5658_TRINITY_DN15478_c0_g1_i1_1347_TPlot.pdf	0	380.243	-Inf	down	1.0627e-84	4.7946e-84
ath-miR5658	TRINITY_DN19655_c0_g1_i4	TRINITY_DN19655_c0_g1	NA	NA	NA	NA	181	201	192	0.700658	5.5	AUACAUUAUCAUCAUCAACAU&AUGAUGAUGAUGAUGAUGAAA	0	0	NA	NA	NA	5	190.121	3	0.987369	Output/short456/cleaveLand_result/t_plot/ath-miR5658_TRINITY_DN19655_c0_g1_i4_192_TPlot.pdf	0	190.121	-Inf	down	2.9642e-43	6.43543e-43
ath-miR5658	TRINITY_DN19655_c0_g1_i5	TRINITY_DN19655_c0_g1	NA	NA	NA	NA	356	376	367	0.700658	5.5	AUACAUUAUCAUCAUCAACAU&AUGAUGAUGAUGAUGAUGAAA	0	0	NA	NA	NA	3	114.073	3	0.986938	Output/short456/cleaveLand_result/t_plot/ath-miR5658_TRINITY_DN19655_c0_g1_i5_367_TPlot.pdf	0	114.073	-Inf	down	1.252e-26	2.10489e-26
ath-miR5658	TRINITY_DN2363_c0_g1_i12	TRINITY_DN2363_c0_g1	NA	NA	GO:0009833|plant-type primary cell wall biogenesis;GO:0030244|cellulose biosynthetic process;GO:0071555|cell wall organization;GO:0005794|Golgi apparatus;GO:0005802|trans-Golgi network;GO:0005886|plasma membrane;GO:0016021|integral component of membrane;GO:0016759|cellulose synthase activity;GO:0016760|cellulose synthase (UDP-forming) activity;GO:0046872|metal ion binding	NA	3352	3372	3363	0.680921	7	CUUGAUCAUCAACAUCAUCGG&AUGAUGAUGAUGAUGAUGAAA	0	0	NA	NA	NA	1	38.0243	4	0.959554	Output/short456/cleaveLand_result/t_plot/ath-miR5658_TRINITY_DN2363_c0_g1_i12_3363_TPlot.pdf	0	38.0243	-Inf	down	6.9845e-10	7.47646e-10
ath-miR5658	TRINITY_DN2363_c0_g1_i17	TRINITY_DN2363_c0_g1	NA	NA	GO:0009833|plant-type primary cell wall biogenesis;GO:0030244|cellulose biosynthetic process;GO:0071555|cell wall organization;GO:0005794|Golgi apparatus;GO:0005802|trans-Golgi network;GO:0005886|plasma membrane;GO:0016021|integral component of membrane;GO:0016759|cellulose synthase activity;GO:0016760|cellulose synthase (UDP-forming) activity;GO:0046872|metal ion binding	NA	3590	3610	3601	0.680921	7	CUUGAUCAUCAACAUCAUCGG&AUGAUGAUGAUGAUGAUGAAA	0	0	NA	NA	NA	4	152.097	3	0.994593	Output/short456/cleaveLand_result/t_plot/ath-miR5658_TRINITY_DN2363_c0_g1_i17_3601_TPlot.pdf	0	152.097	-Inf	down	5.9991e-35	1.17839e-34
ath-miR5658	TRINITY_DN2947_c0_g1_i26	TRINITY_DN2947_c0_g1	NA	NA	GO:0019310|inositol catabolic process;GO:0019853|L-ascorbic acid biosynthetic process;GO:0005737|cytoplasm;GO:0005506|iron ion binding;GO:0050113|inositol oxygenase activity	ko00053;ko00562	70	90	81	1	1	AUUCAUCAUCAUCAUCAUCAU&AUGAUGAUGAUGAUGAUGAAA	2	129.542	3	0.0443709	Output/long789/cleaveLand_result/t_plot/ath-miR5658_TRINITY_DN2947_c0_g1_i26_81_TPlot.pdf	0	0	NA	NA	NA	129.542	0	Inf	up	5.1393e-30	9.14621e-30
ath-miR5658	TRINITY_DN2947_c0_g1_i37	TRINITY_DN2947_c0_g1	NA	NA	GO:0019310|inositol catabolic process;GO:0019853|L-ascorbic acid biosynthetic process;GO:0005737|cytoplasm;GO:0005506|iron ion binding;GO:0050113|inositol oxygenase activity	ko00053;ko00562	70	90	81	1	1	AUUCAUCAUCAUCAUCAUCAU&AUGAUGAUGAUGAUGAUGAAA	1	64.771	4	0.0243994	Output/long789/cleaveLand_result/t_plot/ath-miR5658_TRINITY_DN2947_c0_g1_i37_81_TPlot.pdf	0	0	NA	NA	NA	64.771	0	Inf	up	8.4037e-16	1.0516e-15
ath-miR5658	TRINITY_DN2947_c0_g1_i46	TRINITY_DN2947_c0_g1	NA	NA	GO:0019310|inositol catabolic process;GO:0019853|L-ascorbic acid biosynthetic process;GO:0005737|cytoplasm;GO:0005506|iron ion binding;GO:0050113|inositol oxygenase activity	ko00053;ko00562	70	90	81	1	1	AUUCAUCAUCAUCAUCAUCAU&AUGAUGAUGAUGAUGAUGAAA	1	64.771	4	0.0272491	Output/long789/cleaveLand_result/t_plot/ath-miR5658_TRINITY_DN2947_c0_g1_i46_81_TPlot.pdf	0	0	NA	NA	NA	64.771	0	Inf	up	8.4037e-16	1.0516e-15
ath-miR5658	TRINITY_DN2947_c0_g1_i60	TRINITY_DN2947_c0_g1	NA	NA	GO:0019310|inositol catabolic process;GO:0019853|L-ascorbic acid biosynthetic process;GO:0005737|cytoplasm;GO:0005506|iron ion binding;GO:0050113|inositol oxygenase activity	ko00053;ko00562	70	90	81	1	1	AUUCAUCAUCAUCAUCAUCAU&AUGAUGAUGAUGAUGAUGAAA	1	64.771	4	0.0205868	Output/long789/cleaveLand_result/t_plot/ath-miR5658_TRINITY_DN2947_c0_g1_i60_81_TPlot.pdf	0	0	NA	NA	NA	64.771	0	Inf	up	8.4037e-16	1.0516e-15
ath-miR5658	TRINITY_DN2947_c0_g1_i61	TRINITY_DN2947_c0_g1	NA	NA	GO:0019310|inositol catabolic process;GO:0019853|L-ascorbic acid biosynthetic process;GO:0005737|cytoplasm;GO:0005506|iron ion binding;GO:0050113|inositol oxygenase activity	ko00053;ko00562	70	90	81	1	1	AUUCAUCAUCAUCAUCAUCAU&AUGAUGAUGAUGAUGAUGAAA	1	64.771	4	0.01612	Output/long789/cleaveLand_result/t_plot/ath-miR5658_TRINITY_DN2947_c0_g1_i61_81_TPlot.pdf	0	0	NA	NA	NA	64.771	0	Inf	up	8.4037e-16	1.0516e-15
ath-miR5658	TRINITY_DN2947_c0_g1_i63	TRINITY_DN2947_c0_g1	NA	NA	GO:0019310|inositol catabolic process;GO:0019853|L-ascorbic acid biosynthetic process;GO:0005737|cytoplasm;GO:0005506|iron ion binding;GO:0050113|inositol oxygenase activity	ko00053;ko00562	70	90	81	1	1	AUUCAUCAUCAUCAUCAUCAU&AUGAUGAUGAUGAUGAUGAAA	1	64.771	4	0.0189939	Output/long789/cleaveLand_result/t_plot/ath-miR5658_TRINITY_DN2947_c0_g1_i63_81_TPlot.pdf	0	0	NA	NA	NA	64.771	0	Inf	up	8.4037e-16	1.0516e-15
ath-miR858b	TRINITY_DN3922_c0_g1_i11	TRINITY_DN3922_c0_g1	NA	NA	GO:0009793|embryo development ending in seed dormancy;GO:0010183|pollen tube guidance;GO:0005886|plasma membrane;GO:0016021|integral component of membrane;GO:0099503|secretory vesicle	NA	2502	2522	2513	0.686981	4.5	GAGGGAUC-AGCAGACAACGAA&UUCGUUGUCUGUUCGA-CCUUG	2	129.542	3	0.290872	Output/long789/cleaveLand_result/t_plot/ath-miR858b_TRINITY_DN3922_c0_g1_i11_2513_TPlot.pdf	0	0	NA	NA	NA	129.542	0	Inf	up	5.1393e-30	9.14621e-30
ath-miR858b	TRINITY_DN3922_c0_g1_i33	TRINITY_DN3922_c0_g1	NA	NA	GO:0009793|embryo development ending in seed dormancy;GO:0010183|pollen tube guidance;GO:0005886|plasma membrane;GO:0016021|integral component of membrane;GO:0099503|secretory vesicle	NA	2430	2450	2441	0.686981	4.5	GAGGGAUC-AGCAGACAACGAA&UUCGUUGUCUGUUCGA-CCUUG	2	129.542	3	0.302786	Output/long789/cleaveLand_result/t_plot/ath-miR858b_TRINITY_DN3922_c0_g1_i33_2441_TPlot.pdf	0	0	NA	NA	NA	129.542	0	Inf	up	5.1393e-30	9.14621e-30
ath-miR858b	TRINITY_DN3922_c0_g1_i52	TRINITY_DN3922_c0_g1	NA	NA	GO:0009793|embryo development ending in seed dormancy;GO:0010183|pollen tube guidance;GO:0005886|plasma membrane;GO:0016021|integral component of membrane;GO:0099503|secretory vesicle	NA	2434	2454	2445	0.686981	4.5	GAGGGAUC-AGCAGACAACGAA&UUCGUUGUCUGUUCGA-CCUUG	3	194.313	3	0.297279	Output/long789/cleaveLand_result/t_plot/ath-miR858b_TRINITY_DN3922_c0_g1_i52_2445_TPlot.pdf	0	0	NA	NA	NA	194.313	0	Inf	up	3.6042e-44	8.09893e-44
ath-miR858b	TRINITY_DN3922_c0_g1_i63	TRINITY_DN3922_c0_g1	NA	NA	GO:0009793|embryo development ending in seed dormancy;GO:0010183|pollen tube guidance;GO:0005886|plasma membrane;GO:0016021|integral component of membrane;GO:0099503|secretory vesicle	NA	2400	2420	2411	0.686981	4.5	GAGGGAUC-AGCAGACAACGAA&UUCGUUGUCUGUUCGA-CCUUG	2	129.542	3	0.301519	Output/long789/cleaveLand_result/t_plot/ath-miR858b_TRINITY_DN3922_c0_g1_i63_2411_TPlot.pdf	0	0	NA	NA	NA	129.542	0	Inf	up	5.1393e-30	9.14621e-30
ath-miR858b	TRINITY_DN3922_c0_g1_i71	TRINITY_DN3922_c0_g1	NA	NA	GO:0009793|embryo development ending in seed dormancy;GO:0010183|pollen tube guidance;GO:0005886|plasma membrane;GO:0016021|integral component of membrane;GO:0099503|secretory vesicle	NA	2617	2637	2628	0.686981	4.5	GAGGGAUC-AGCAGACAACGAA&UUCGUUGUCUGUUCGA-CCUUG	1	64.771	4	0.167223	Output/long789/cleaveLand_result/t_plot/ath-miR858b_TRINITY_DN3922_c0_g1_i71_2628_TPlot.pdf	0	0	NA	NA	NA	64.771	0	Inf	up	8.4037e-16	1.0516e-15
ath-miR858b	TRINITY_DN3922_c0_g1_i86	TRINITY_DN3922_c0_g1	NA	NA	GO:0009793|embryo development ending in seed dormancy;GO:0010183|pollen tube guidance;GO:0005886|plasma membrane;GO:0016021|integral component of membrane;GO:0099503|secretory vesicle	NA	2685	2705	2696	0.686981	4.5	GAGGGAUC-AGCAGACAACGAA&UUCGUUGUCUGUUCGA-CCUUG	1	64.771	4	0.17798	Output/long789/cleaveLand_result/t_plot/ath-miR858b_TRINITY_DN3922_c0_g1_i86_2696_TPlot.pdf	0	0	NA	NA	NA	64.771	0	Inf	up	8.4037e-16	1.0516e-15
atr-miR390.1	TRINITY_DN10182_c0_g1_i1	TRINITY_DN10182_c0_g1	NA	NA	GO:0006817|phosphate ion transport;GO:0016036|cellular response to phosphate starvation;GO:0044257|cellular protein catabolic process;GO:0055062|phosphate ion homeostasis;GO:2000185|regulation of phosphate transmembrane transport;GO:0000139|Golgi membrane;GO:0005783|endoplasmic reticulum;GO:0005789|endoplasmic reticulum membrane;GO:0005794|Golgi apparatus;GO:0005524|ATP binding;GO:0016874|ligase …	ko04120	3375	3394	3386	0.746231	6.5	UGCUGUCCCUCCA-GGCUUUG&UAAAGCUCAGGAGGGAUAGCG	0	0	NA	NA	NA	1	38.0243	4	0.0169159	Output/short456/cleaveLand_result/t_plot/atr-miR390.1_TRINITY_DN10182_c0_g1_i1_3386_TPlot.pdf	0	38.0243	-Inf	down	6.9845e-10	7.47646e-10
atr-miR397b	TRINITY_DN2695_c0_g2_i1	TRINITY_DN2695_c0_g2	NA	NA	GO:0006412|translation;GO:0006414|translational elongation;GO:0005737|cytoplasm;GO:0003746|translation elongation factor activity;GO:0003924|GTPase activity;GO:0005525|GTP binding	ko03013	1553	1572	1564	0.682051	6	AACCAAGGCUGCAGUCAA-GA&UCAUUGAGUGCAGCGUUGGUG	0	0	NA	NA	NA	6	228.146	2	0.173298	Output/short456/cleaveLand_result/t_plot/atr-miR397b_TRINITY_DN2695_c0_g2_i1_1564_TPlot.pdf	0	228.146	-Inf	down	1.4931e-51	4.44467e-51
atr-miR397b	TRINITY_DN2695_c0_g2_i2	TRINITY_DN2695_c0_g2	NA	NA	GO:0006412|translation;GO:0006414|translational elongation;GO:0005737|cytoplasm;GO:0003746|translation elongation factor activity;GO:0003924|GTPase activity;GO:0005525|GTP binding	ko03013	1553	1572	1564	0.682051	6	AACCAAGGCUGCAGUCAA-GA&UCAUUGAGUGCAGCGUUGGUG	0	0	NA	NA	NA	6	228.146	2	0.173619	Output/short456/cleaveLand_result/t_plot/atr-miR397b_TRINITY_DN2695_c0_g2_i2_1564_TPlot.pdf	0	228.146	-Inf	down	1.4931e-51	4.44467e-51
atr-miR397b	TRINITY_DN2695_c0_g2_i6	TRINITY_DN2695_c0_g2	NA	NA	GO:0006412|translation;GO:0006414|translational elongation;GO:0005737|cytoplasm;GO:0003746|translation elongation factor activity;GO:0003924|GTPase activity;GO:0005525|GTP binding	ko03013	1553	1572	1564	0.682051	6	AACCAAGGCUGCAGUCAA-GA&UCAUUGAGUGCAGCGUUGGUG	0	0	NA	NA	NA	5	190.121	3	0.26489	Output/short456/cleaveLand_result/t_plot/atr-miR397b_TRINITY_DN2695_c0_g2_i6_1564_TPlot.pdf	0	190.121	-Inf	down	2.9642e-43	6.43543e-43
bdi-miR7749-5p	TRINITY_DN1117_c0_g1_i11	TRINITY_DN1117_c0_g1	NA	NA	GO:0000381|regulation of alternative mRNA splicing, via spliceosome;GO:0005634|nucleus;GO:0003729|mRNA binding	NA	412	435	426	0.661538	6.5	UCCGCAGCCACCGCCCUCGUCGAG&AUCGUCGAGGGCGGAGAUUGCGGC	0	0	NA	NA	NA	2	76.0485	0	0.025304	Output/short456/cleaveLand_result/t_plot/bdi-miR7749-5p_TRINITY_DN1117_c0_g1_i11_426_TPlot.pdf	0	76.0485	-Inf	down	2.7637e-18	4.06116e-18
bdi-miR7749-5p	TRINITY_DN1117_c0_g1_i18	TRINITY_DN1117_c0_g1	NA	NA	GO:0000381|regulation of alternative mRNA splicing, via spliceosome;GO:0005634|nucleus;GO:0003729|mRNA binding	NA	412	435	426	0.661538	6.5	UCCGCAGCCACCGCCCUCGUCGAG&AUCGUCGAGGGCGGAGAUUGCGGC	0	0	NA	NA	NA	1	38.0243	4	0.09873	Output/short456/cleaveLand_result/t_plot/bdi-miR7749-5p_TRINITY_DN1117_c0_g1_i18_426_TPlot.pdf	0	38.0243	-Inf	down	6.9845e-10	7.47646e-10
bdi-miR7749-5p	TRINITY_DN1117_c0_g1_i21	TRINITY_DN1117_c0_g1	NA	NA	GO:0000381|regulation of alternative mRNA splicing, via spliceosome;GO:0005634|nucleus;GO:0003729|mRNA binding	NA	412	435	426	0.661538	6.5	UCCGCAGCCACCGCCCUCGUCGAG&AUCGUCGAGGGCGGAGAUUGCGGC	0	0	NA	NA	NA	1	38.0243	4	0.0983723	Output/short456/cleaveLand_result/t_plot/bdi-miR7749-5p_TRINITY_DN1117_c0_g1_i21_426_TPlot.pdf	0	38.0243	-Inf	down	6.9845e-10	7.47646e-10
bdi-miR845	TRINITY_DN1485_c0_g1_i1	TRINITY_DN1485_c0_g1	NA	NA	GO:0010027|thylakoid membrane organization;GO:0016050|vesicle organization;GO:0005634|nucleus;GO:0009507|chloroplast;GO:0009508|plastid chromosome;GO:0009534|chloroplast thylakoid;GO:0009535|chloroplast thylakoid membrane;GO:0009570|chloroplast stroma;GO:0009706|chloroplast inner membrane;GO:0009941|chloroplast envelope;GO:0042644|chloroplast nucleoid	NA	639	661	650	0.698592	6.5	CUGAGGAUUGGUAUCGAAGAGCA&UGCUCU--GAUACCAAUUGUUGG	3	194.313	3	0.623218	Output/long789/cleaveLand_result/t_plot/bdi-miR845_TRINITY_DN1485_c0_g1_i1_650_TPlot.pdf	0	0	NA	NA	NA	194.313	0	Inf	up	3.6042e-44	8.09893e-44
bdi-miR845	TRINITY_DN1485_c0_g1_i4	TRINITY_DN1485_c0_g1	NA	NA	GO:0010027|thylakoid membrane organization;GO:0016050|vesicle organization;GO:0005634|nucleus;GO:0009507|chloroplast;GO:0009508|plastid chromosome;GO:0009534|chloroplast thylakoid;GO:0009535|chloroplast thylakoid membrane;GO:0009570|chloroplast stroma;GO:0009706|chloroplast inner membrane;GO:0009941|chloroplast envelope;GO:0042644|chloroplast nucleoid	NA	639	661	650	0.698592	6.5	CUGAGGAUUGGUAUCGAAGAGCA&UGCUCU--GAUACCAAUUGUUGG	4	259.084	2	0.427558	Output/long789/cleaveLand_result/t_plot/bdi-miR845_TRINITY_DN1485_c0_g1_i4_650_TPlot.pdf	0	0	NA	NA	NA	259.084	0	Inf	up	2.672e-58	8.29613e-58
bdi-miR845	TRINITY_DN1485_c0_g1_i5	TRINITY_DN1485_c0_g1	NA	NA	GO:0010027|thylakoid membrane organization;GO:0016050|vesicle organization;GO:0005634|nucleus;GO:0009507|chloroplast;GO:0009508|plastid chromosome;GO:0009534|chloroplast thylakoid;GO:0009535|chloroplast thylakoid membrane;GO:0009570|chloroplast stroma;GO:0009706|chloroplast inner membrane;GO:0009941|chloroplast envelope;GO:0042644|chloroplast nucleoid	NA	639	661	650	0.698592	6.5	CUGAGGAUUGGUAUCGAAGAGCA&UGCUCU--GAUACCAAUUGUUGG	2	129.542	3	0.617243	Output/long789/cleaveLand_result/t_plot/bdi-miR845_TRINITY_DN1485_c0_g1_i5_650_TPlot.pdf	0	0	NA	NA	NA	129.542	0	Inf	up	5.1393e-30	9.14621e-30
bdi-miR845	TRINITY_DN1485_c0_g1_i6	TRINITY_DN1485_c0_g1	NA	NA	GO:0010027|thylakoid membrane organization;GO:0016050|vesicle organization;GO:0005634|nucleus;GO:0009507|chloroplast;GO:0009508|plastid chromosome;GO:0009534|chloroplast thylakoid;GO:0009535|chloroplast thylakoid membrane;GO:0009570|chloroplast stroma;GO:0009706|chloroplast inner membrane;GO:0009941|chloroplast envelope;GO:0042644|chloroplast nucleoid	NA	639	661	650	0.698592	6.5	CUGAGGAUUGGUAUCGAAGAGCA&UGCUCU--GAUACCAAUUGUUGG	2	129.542	3	0.615851	Output/long789/cleaveLand_result/t_plot/bdi-miR845_TRINITY_DN1485_c0_g1_i6_650_TPlot.pdf	0	0	NA	NA	NA	129.542	0	Inf	up	5.1393e-30	9.14621e-30
bna-miR156a	TRINITY_DN17771_c0_g1_i1	TRINITY_DN17771_c0_g1	NA	NA	NA	NA	12	32	23	0.909794	2	CGUGCUCUCUCUCUUCUGUCA&UGACAGAAGAGAGUGAGCACA	3	194.313	3	0.0185844	Output/long789/cleaveLand_result/t_plot/bna-miR156a_TRINITY_DN17771_c0_g1_i1_23_TPlot.pdf	0	0	NA	NA	NA	194.313	0	Inf	up	3.6042e-44	8.09893e-44
bna-miR156a	TRINITY_DN6217_c0_g1_i3	TRINITY_DN6217_c0_g1	NA	NA	NA	NA	273	293	284	0.778351	5	CGUGCUCUCUCUCCUCUGUCG&UGACAGAAGAGAGUGAGCACA	4	259.084	3	0.0327348	Output/long789/cleaveLand_result/t_plot/bna-miR156a_TRINITY_DN6217_c0_g1_i3_284_TPlot.pdf	1	38.0243	4	0.0215853	Output/short456/cleaveLand_result/t_plot/bna-miR156a_TRINITY_DN6217_c0_g1_i3_284_TPlot.pdf	259.084	38.0243	2.76843	up	1.1756e-37	2.42901e-37
bna-miR156a	TRINITY_DN6217_c0_g1_i7	TRINITY_DN6217_c0_g1	NA	NA	NA	NA	273	293	284	0.778351	5	CGUGCUCUCUCUCCUCUGUCG&UGACAGAAGAGAGUGAGCACA	1	64.771	4	0.0173983	Output/long789/cleaveLand_result/t_plot/bna-miR156a_TRINITY_DN6217_c0_g1_i7_284_TPlot.pdf	1	38.0243	4	0.021197	Output/short456/cleaveLand_result/t_plot/bna-miR156a_TRINITY_DN6217_c0_g1_i7_284_TPlot.pdf	64.771	38.0243	0.768429	up	0.0083365	0.00847593
bna-miR156a	TRINITY_DN6217_c0_g1_i8	TRINITY_DN6217_c0_g1	NA	NA	NA	NA	273	293	284	0.778351	5	CGUGCUCUCUCUCCUCUGUCG&UGACAGAAGAGAGUGAGCACA	3	194.313	3	0.03332	Output/long789/cleaveLand_result/t_plot/bna-miR156a_TRINITY_DN6217_c0_g1_i8_284_TPlot.pdf	1	38.0243	4	0.0219734	Output/short456/cleaveLand_result/t_plot/bna-miR156a_TRINITY_DN6217_c0_g1_i8_284_TPlot.pdf	194.313	38.0243	2.35339	up	1.1354e-24	1.84702e-24
bna-miR156a	TRINITY_DN66807_c0_g1_i2	TRINITY_DN66807_c0_g1	NA	NA	GO:0009651|response to salt stress;GO:0010182|sugar mediated signaling pathway;GO:0005634|nucleus;GO:0005739|mitochondrion;GO:0004672|protein kinase activity;GO:0004712|protein serine/threonine/tyrosine kinase activity;GO:0005524|ATP binding;GO:0106310|protein serine kinase activity;GO:0106311|protein threonine kinase activity	NA	2383	2405	2395	0.652062	5	UGAUGUUUACUCUUUUGCUGUCA&UGACAG-AAGAGAGUGAGCA-CA	5	323.855	3	0.293014	Output/long789/cleaveLand_result/t_plot/bna-miR156a_TRINITY_DN66807_c0_g1_i2_2395_TPlot.pdf	0	0	NA	NA	NA	323.855	0	Inf	up	2.0406e-72	7.88259e-72
bna-miR156a	TRINITY_DN9504_c0_g1_i1	TRINITY_DN9504_c0_g1	NA	NA	GO:0005886|plasma membrane;GO:0016021|integral component of membrane;GO:0005524|ATP binding;GO:0106310|protein serine kinase activity;GO:0106311|protein threonine kinase activity	NA	1946	1966	1957	0.909794	2	CGUGCUCUCUCUCUUCUGUCA&UGACAGAAGAGAGUGAGCACA	1	64.771	4	0.00873732	Output/long789/cleaveLand_result/t_plot/bna-miR156a_TRINITY_DN9504_c0_g1_i1_1957_TPlot.pdf	0	0	NA	NA	NA	64.771	0	Inf	up	8.4037e-16	1.0516e-15
bna-miR156a	TRINITY_DN9504_c0_g1_i11	TRINITY_DN9504_c0_g1	NA	NA	GO:0005886|plasma membrane;GO:0016021|integral component of membrane;GO:0005524|ATP binding;GO:0106310|protein serine kinase activity;GO:0106311|protein threonine kinase activity	NA	1729	1749	1740	0.909794	2	CGUGCUCUCUCUCUUCUGUCA&UGACAGAAGAGAGUGAGCACA	3	194.313	3	0.0168011	Output/long789/cleaveLand_result/t_plot/bna-miR156a_TRINITY_DN9504_c0_g1_i11_1740_TPlot.pdf	0	0	NA	NA	NA	194.313	0	Inf	up	3.6042e-44	8.09893e-44
bna-miR156a	TRINITY_DN9504_c0_g1_i6	TRINITY_DN9504_c0_g1	NA	NA	GO:0005886|plasma membrane;GO:0016021|integral component of membrane;GO:0005524|ATP binding;GO:0106310|protein serine kinase activity;GO:0106311|protein threonine kinase activity	NA	813	833	824	0.909794	2	CGUGCUCUCUCUCUUCUGUCA&UGACAGAAGAGAGUGAGCACA	3	194.313	3	0.0173959	Output/long789/cleaveLand_result/t_plot/bna-miR156a_TRINITY_DN9504_c0_g1_i6_824_TPlot.pdf	0	0	NA	NA	NA	194.313	0	Inf	up	3.6042e-44	8.09893e-44
bna-miR167d	TRINITY_DN3049_c0_g3_i1	TRINITY_DN3049_c0_g3	NA	NA	GO:0030246|carbohydrate binding	NA	1012	1031	1022	0.691489	6.5	UUAUCGUGUUGGCAGUUUUG&UGAAGCUGCCAGCAUGAUCU	19	1230.65	2	0.160217	Output/long789/cleaveLand_result/t_plot/bna-miR167d_TRINITY_DN3049_c0_g3_i1_1022_TPlot.pdf	0	0	NA	NA	NA	1230.65	0	Inf	up	0	0
bna-miR167d	TRINITY_DN34956_c1_g1_i1	TRINITY_DN34956_c1_g1	NA	NA	GO:0006986|response to unfolded protein;GO:0009266|response to temperature stimulus;GO:0009408|response to heat;GO:0009615|response to virus;GO:0009617|response to bacterium;GO:0016567|protein ubiquitination;GO:0034620|cellular response to unfolded protein;GO:0042026|protein refolding;GO:0046686|response to cadmium ion;GO:0051085|chaperone cofactor-dependent protein refolding;GO:0005618|cell wall…	ko03040;ko04141;ko04144	1300	1319	1310	0.672872	7	AGGUGGUGCCGGUGGCUUCC&UGAAGCUGCCAGCAUGAUCU	28	1813.59	3	0.358645	Output/long789/cleaveLand_result/t_plot/bna-miR167d_TRINITY_DN34956_c1_g1_i1_1310_TPlot.pdf	0	0	NA	NA	NA	1813.59	0	Inf	up	0	0
bna-miR167d	TRINITY_DN8922_c0_g2_i1	TRINITY_DN8922_c0_g2	NA	NA	GO:0006997|nucleus organization;GO:0097298|regulation of nucleus size;GO:0005634|nucleus;GO:0005635|nuclear envelope;GO:0005652|nuclear lamina;GO:0005654|nucleoplasm;GO:0005739|mitochondrion;GO:0005829|cytosol;GO:0031965|nuclear membrane;GO:0034399|nuclear periphery	NA	5676	5694	5686	0.664894	6	AGAUCAUGCUGG-AGACUCA&UGAAGCUGCCAGCAUGAUCU	12	777.252	2	0.254592	Output/long789/cleaveLand_result/t_plot/bna-miR167d_TRINITY_DN8922_c0_g2_i1_5686_TPlot.pdf	2	76.0485	3	0.411761	Output/short456/cleaveLand_result/t_plot/bna-miR167d_TRINITY_DN8922_c0_g2_i1_5686_TPlot.pdf	777.252	76.0485	3.35339	up	0	0
bna-miR167d	TRINITY_DN8922_c0_g2_i4	TRINITY_DN8922_c0_g2	NA	NA	GO:0006997|nucleus organization;GO:0097298|regulation of nucleus size;GO:0005634|nucleus;GO:0005635|nuclear envelope;GO:0005652|nuclear lamina;GO:0005654|nucleoplasm;GO:0005739|mitochondrion;GO:0005829|cytosol;GO:0031965|nuclear membrane;GO:0034399|nuclear periphery	NA	4491	4509	4501	0.664894	6	AGAUCAUGCUGG-AGACUCA&UGAAGCUGCCAGCAUGAUCU	8	518.168	2	0.259282	Output/long789/cleaveLand_result/t_plot/bna-miR167d_TRINITY_DN8922_c0_g2_i4_4501_TPlot.pdf	4	152.097	3	0.418427	Output/short456/cleaveLand_result/t_plot/bna-miR167d_TRINITY_DN8922_c0_g2_i4_4501_TPlot.pdf	518.168	152.097	1.76843	up	2.0885e-45	6.07611e-45
bna-miR167d	TRINITY_DN8922_c0_g2_i8	TRINITY_DN8922_c0_g2	NA	NA	GO:0006997|nucleus organization;GO:0097298|regulation of nucleus size;GO:0005634|nucleus;GO:0005635|nuclear envelope;GO:0005652|nuclear lamina;GO:0005654|nucleoplasm;GO:0005739|mitochondrion;GO:0005829|cytosol;GO:0031965|nuclear membrane;GO:0034399|nuclear periphery	NA	5030	5048	5040	0.664894	6	AGAUCAUGCUGG-AGACUCA&UGAAGCUGCCAGCAUGAUCU	13	842.023	2	0.262392	Output/long789/cleaveLand_result/t_plot/bna-miR167d_TRINITY_DN8922_c0_g2_i8_5040_TPlot.pdf	4	152.097	3	0.422829	Output/short456/cleaveLand_result/t_plot/bna-miR167d_TRINITY_DN8922_c0_g2_i8_5040_TPlot.pdf	842.023	152.097	2.46887	up	0	0
bna-miR167d	TRINITY_DN8922_c0_g2_i9	TRINITY_DN8922_c0_g2	NA	NA	GO:0006997|nucleus organization;GO:0097298|regulation of nucleus size;GO:0005634|nucleus;GO:0005635|nuclear envelope;GO:0005652|nuclear lamina;GO:0005654|nucleoplasm;GO:0005739|mitochondrion;GO:0005829|cytosol;GO:0031965|nuclear membrane;GO:0034399|nuclear periphery	NA	3845	3863	3855	0.664894	6	AGAUCAUGCUGG-AGACUCA&UGAAGCUGCCAGCAUGAUCU	8	518.168	2	0.261615	Output/long789/cleaveLand_result/t_plot/bna-miR167d_TRINITY_DN8922_c0_g2_i9_3855_TPlot.pdf	2	76.0485	3	0.421732	Output/short456/cleaveLand_result/t_plot/bna-miR167d_TRINITY_DN8922_c0_g2_i9_3855_TPlot.pdf	518.168	76.0485	2.76843	up	1.5465e-73	6.40218e-73
bra-miR168b-5p	TRINITY_DN2640_c1_g1_i1	TRINITY_DN2640_c1_g1	NA	NA	GO:0006417|regulation of translation;GO:0009616|RNAi-mediated antiviral immune response;GO:0009733|response to auxin;GO:0009850|auxin metabolic process;GO:0009955|adaxial/abaxial pattern specification;GO:0009965|leaf morphogenesis;GO:0010218|response to far red light;GO:0010305|leaf vascular tissue pattern formation;GO:0010589|leaf proximal/distal pattern formation;GO:0016032|viral process;GO:001…	NA	637	658	649	0.784141	5	GUCCCCGAGCUGCACCAAGCUA&UCGCUUGGUGCAGGUCGGG-AC	3	194.313	3	0.016206	Output/long789/cleaveLand_result/t_plot/bra-miR168b-5p_TRINITY_DN2640_c1_g1_i1_649_TPlot.pdf	0	0	NA	NA	NA	194.313	0	Inf	up	3.6042e-44	8.09893e-44
bra-miR168b-5p	TRINITY_DN2640_c1_g1_i2	TRINITY_DN2640_c1_g1	NA	NA	GO:0006417|regulation of translation;GO:0009616|RNAi-mediated antiviral immune response;GO:0009733|response to auxin;GO:0009850|auxin metabolic process;GO:0009955|adaxial/abaxial pattern specification;GO:0009965|leaf morphogenesis;GO:0010218|response to far red light;GO:0010305|leaf vascular tissue pattern formation;GO:0010589|leaf proximal/distal pattern formation;GO:0016032|viral process;GO:001…	NA	637	658	649	0.784141	5	GUCCCCGAGCUGCACCAAGCUA&UCGCUUGGUGCAGGUCGGG-AC	3	194.313	3	0.0156105	Output/long789/cleaveLand_result/t_plot/bra-miR168b-5p_TRINITY_DN2640_c1_g1_i2_649_TPlot.pdf	0	0	NA	NA	NA	194.313	0	Inf	up	3.6042e-44	8.09893e-44
bra-miR168b-5p	TRINITY_DN5396_c0_g1_i12	TRINITY_DN5396_c0_g1	NA	NA	NA	NA	2030	2050	2041	0.726872	7	UUUACGACCUGCACCAAGCAU&UCGCUUGGUGCAGGUCGGGAC	0	0	NA	NA	NA	2	76.0485	3	0.0690517	Output/short456/cleaveLand_result/t_plot/bra-miR168b-5p_TRINITY_DN5396_c0_g1_i12_2041_TPlot.pdf	0	76.0485	-Inf	down	2.7637e-18	4.06116e-18
bra-miR168b-5p	TRINITY_DN5396_c0_g1_i9	TRINITY_DN5396_c0_g1	NA	NA	NA	NA	1730	1750	1741	0.726872	7	UUUACGACCUGCACCAAGCAU&UCGCUUGGUGCAGGUCGGGAC	0	0	NA	NA	NA	2	76.0485	3	0.068462	Output/short456/cleaveLand_result/t_plot/bra-miR168b-5p_TRINITY_DN5396_c0_g1_i9_1741_TPlot.pdf	0	76.0485	-Inf	down	2.7637e-18	4.06116e-18
cas-miR156g	TRINITY_DN1585_c0_g2_i12	TRINITY_DN1585_c0_g2	NA	NA	NA	NA	445	463	453	0.662921	6	CUGCUCAC-CUCUUUUGCUC&GA-CAGAAGAGAGUGAGCAC	3	194.313	3	0.554458	Output/long789/cleaveLand_result/t_plot/cas-miR156g_TRINITY_DN1585_c0_g2_i12_453_TPlot.pdf	0	0	NA	NA	NA	194.313	0	Inf	up	3.6042e-44	8.09893e-44
cas-miR156g	TRINITY_DN1585_c0_g2_i16	TRINITY_DN1585_c0_g2	NA	NA	GO:0006421|asparaginyl-tRNA aminoacylation;GO:0048481|plant ovule development;GO:0005739|mitochondrion;GO:0009507|chloroplast;GO:0009570|chloroplast stroma;GO:0003677|DNA binding;GO:0004816|asparagine-tRNA ligase activity;GO:0005524|ATP binding	NA	445	463	453	0.662921	6	CUGCUCAC-CUCUUUUGCUC&GA-CAGAAGAGAGUGAGCAC	8	518.168	2	0.386835	Output/long789/cleaveLand_result/t_plot/cas-miR156g_TRINITY_DN1585_c0_g2_i16_453_TPlot.pdf	0	0	NA	NA	NA	518.168	0	Inf	up	0	0
cas-miR156g	TRINITY_DN1585_c0_g2_i4	TRINITY_DN1585_c0_g2	NA	NA	GO:0006421|asparaginyl-tRNA aminoacylation;GO:0048481|plant ovule development;GO:0005739|mitochondrion;GO:0009507|chloroplast;GO:0009570|chloroplast stroma;GO:0003677|DNA binding;GO:0004816|asparagine-tRNA ligase activity;GO:0005524|ATP binding	NA	445	463	453	0.662921	6	CUGCUCAC-CUCUUUUGCUC&GA-CAGAAGAGAGUGAGCAC	5	323.855	2	0.387909	Output/long789/cleaveLand_result/t_plot/cas-miR156g_TRINITY_DN1585_c0_g2_i4_453_TPlot.pdf	0	0	NA	NA	NA	323.855	0	Inf	up	2.0406e-72	7.88259e-72
cas-miR156g	TRINITY_DN1585_c0_g2_i5	TRINITY_DN1585_c0_g2	NA	NA	GO:0006421|asparaginyl-tRNA aminoacylation;GO:0048481|plant ovule development;GO:0005739|mitochondrion;GO:0009507|chloroplast;GO:0009570|chloroplast stroma;GO:0003677|DNA binding;GO:0004816|asparagine-tRNA ligase activity;GO:0005524|ATP binding	NA	445	463	453	0.662921	6	CUGCUCAC-CUCUUUUGCUC&GA-CAGAAGAGAGUGAGCAC	4	259.084	2	0.377957	Output/long789/cleaveLand_result/t_plot/cas-miR156g_TRINITY_DN1585_c0_g2_i5_453_TPlot.pdf	0	0	NA	NA	NA	259.084	0	Inf	up	2.672e-58	8.29613e-58
cas-miR156g	TRINITY_DN1585_c0_g2_i7	TRINITY_DN1585_c0_g2	NA	NA	GO:0006421|asparaginyl-tRNA aminoacylation;GO:0048481|plant ovule development;GO:0005739|mitochondrion;GO:0009507|chloroplast;GO:0009570|chloroplast stroma;GO:0003677|DNA binding;GO:0004816|asparagine-tRNA ligase activity;GO:0005524|ATP binding	NA	445	463	453	0.662921	6	CUGCUCAC-CUCUUUUGCUC&GA-CAGAAGAGAGUGAGCAC	4	259.084	2	0.382953	Output/long789/cleaveLand_result/t_plot/cas-miR156g_TRINITY_DN1585_c0_g2_i7_453_TPlot.pdf	0	0	NA	NA	NA	259.084	0	Inf	up	2.672e-58	8.29613e-58
cas-miR156g	TRINITY_DN1585_c0_g2_i8	TRINITY_DN1585_c0_g2	NA	NA	GO:0006421|asparaginyl-tRNA aminoacylation;GO:0048481|plant ovule development;GO:0005739|mitochondrion;GO:0009507|chloroplast;GO:0009570|chloroplast stroma;GO:0003677|DNA binding;GO:0004816|asparagine-tRNA ligase activity;GO:0005524|ATP binding	NA	445	463	453	0.662921	6	CUGCUCAC-CUCUUUUGCUC&GA-CAGAAGAGAGUGAGCAC	2	129.542	3	0.573454	Output/long789/cleaveLand_result/t_plot/cas-miR156g_TRINITY_DN1585_c0_g2_i8_453_TPlot.pdf	0	0	NA	NA	NA	129.542	0	Inf	up	5.1393e-30	9.14621e-30
cas-miR156g	TRINITY_DN1585_c0_g2_i9	TRINITY_DN1585_c0_g2	NA	NA	GO:0006421|asparaginyl-tRNA aminoacylation;GO:0048481|plant ovule development;GO:0005739|mitochondrion;GO:0009507|chloroplast;GO:0009570|chloroplast stroma;GO:0003677|DNA binding;GO:0004816|asparagine-tRNA ligase activity;GO:0005524|ATP binding	NA	445	463	453	0.662921	6	CUGCUCAC-CUCUUUUGCUC&GA-CAGAAGAGAGUGAGCAC	5	323.855	2	0.384897	Output/long789/cleaveLand_result/t_plot/cas-miR156g_TRINITY_DN1585_c0_g2_i9_453_TPlot.pdf	0	0	NA	NA	NA	323.855	0	Inf	up	2.0406e-72	7.88259e-72
cas-miR156g	TRINITY_DN1737_c2_g1_i18	TRINITY_DN1737_c2_g1	NA	NA	NA	NA	235	254	245	0.685393	6	GUGCUGCAUUUUCUUCUGAU&GACAGAAGAGAGUG-AGCAC	1	64.771	4	0.238182	Output/long789/cleaveLand_result/t_plot/cas-miR156g_TRINITY_DN1737_c2_g1_i18_245_TPlot.pdf	0	0	NA	NA	NA	64.771	0	Inf	up	8.4037e-16	1.0516e-15
cas-miR156g	TRINITY_DN1737_c2_g1_i19	TRINITY_DN1737_c2_g1	NA	NA	NA	NA	214	233	224	0.685393	6	GUGCUGCAUUUUCUUCUGAU&GACAGAAGAGAGUG-AGCAC	1	64.771	4	0.243364	Output/long789/cleaveLand_result/t_plot/cas-miR156g_TRINITY_DN1737_c2_g1_i19_224_TPlot.pdf	0	0	NA	NA	NA	64.771	0	Inf	up	8.4037e-16	1.0516e-15
cas-miR156g	TRINITY_DN1737_c2_g1_i32	TRINITY_DN1737_c2_g1	NA	NA	NA	NA	214	233	224	0.685393	6	GUGCUGCAUUUUCUUCUGAU&GACAGAAGAGAGUG-AGCAC	1	64.771	4	0.236198	Output/long789/cleaveLand_result/t_plot/cas-miR156g_TRINITY_DN1737_c2_g1_i32_224_TPlot.pdf	0	0	NA	NA	NA	64.771	0	Inf	up	8.4037e-16	1.0516e-15
cas-miR156g	TRINITY_DN1737_c2_g1_i45	TRINITY_DN1737_c2_g1	NA	NA	NA	NA	235	254	245	0.685393	6	GUGCUGCAUUUUCUUCUGAU&GACAGAAGAGAGUG-AGCAC	1	64.771	4	0.232715	Output/long789/cleaveLand_result/t_plot/cas-miR156g_TRINITY_DN1737_c2_g1_i45_245_TPlot.pdf	0	0	NA	NA	NA	64.771	0	Inf	up	8.4037e-16	1.0516e-15
cas-miR156g	TRINITY_DN1737_c2_g1_i69	TRINITY_DN1737_c2_g1	NA	NA	NA	NA	214	233	224	0.685393	6	GUGCUGCAUUUUCUUCUGAU&GACAGAAGAGAGUG-AGCAC	2	129.542	3	0.398492	Output/long789/cleaveLand_result/t_plot/cas-miR156g_TRINITY_DN1737_c2_g1_i69_224_TPlot.pdf	0	0	NA	NA	NA	129.542	0	Inf	up	5.1393e-30	9.14621e-30
cas-miR156g	TRINITY_DN1737_c2_g1_i8	TRINITY_DN1737_c2_g1	NA	NA	NA	NA	214	233	224	0.685393	6	GUGCUGCAUUUUCUUCUGAU&GACAGAAGAGAGUG-AGCAC	1	64.771	4	0.244101	Output/long789/cleaveLand_result/t_plot/cas-miR156g_TRINITY_DN1737_c2_g1_i8_224_TPlot.pdf	0	0	NA	NA	NA	64.771	0	Inf	up	8.4037e-16	1.0516e-15
cas-miR157d	TRINITY_DN1345_c0_g1_i11	TRINITY_DN1345_c0_g1	NA	NA	NA	NA	510	530	521	0.678977	6	CCAGAGGCUCUCUCUCUUUUG&CAGAAGAUAGAGAGC-ACUGA	0	0	NA	NA	NA	2	76.0485	3	0.277808	Output/short456/cleaveLand_result/t_plot/cas-miR157d_TRINITY_DN1345_c0_g1_i11_521_TPlot.pdf	0	76.0485	-Inf	down	2.7637e-18	4.06116e-18
cas-miR157d	TRINITY_DN1345_c0_g1_i30	TRINITY_DN1345_c0_g1	NA	NA	NA	NA	510	530	521	0.678977	6	CCAGAGGCUCUCUCUCUUUUG&CAGAAGAUAGAGAGC-ACUGA	0	0	NA	NA	NA	1	38.0243	4	0.188035	Output/short456/cleaveLand_result/t_plot/cas-miR157d_TRINITY_DN1345_c0_g1_i30_521_TPlot.pdf	0	38.0243	-Inf	down	6.9845e-10	7.47646e-10
cas-miR157d	TRINITY_DN1345_c0_g1_i6	TRINITY_DN1345_c0_g1	NA	NA	NA	NA	479	499	490	0.678977	6	CCAGAGGCUCUCUCUCUUUUG&CAGAAGAUAGAGAGC-ACUGA	0	0	NA	NA	NA	1	38.0243	4	0.180591	Output/short456/cleaveLand_result/t_plot/cas-miR157d_TRINITY_DN1345_c0_g1_i6_490_TPlot.pdf	0	38.0243	-Inf	down	6.9845e-10	7.47646e-10
cas-miR394	TRINITY_DN30474_c0_g1_i18	TRINITY_DN30474_c0_g1	NA	NA	GO:0005765|lysosomal membrane;GO:0005770|late endosome;GO:0016021|integral component of membrane	NA	1698	1718	1709	0.785536	6	GGAGGUGGAGCGGAUGUCAAA&UUUGGCAUUCUGUCCACCUCC	0	0	NA	NA	NA	2	76.0485	3	0.0206788	Output/short456/cleaveLand_result/t_plot/cas-miR394_TRINITY_DN30474_c0_g1_i18_1709_TPlot.pdf	0	76.0485	-Inf	down	2.7637e-18	4.06116e-18
cas-miR394	TRINITY_DN30474_c0_g1_i22	TRINITY_DN30474_c0_g1	NA	NA	GO:0005765|lysosomal membrane;GO:0005770|late endosome;GO:0016021|integral component of membrane	NA	641	661	652	0.785536	6	GGAGGUGGAGCGGAUGUCAAA&UUUGGCAUUCUGUCCACCUCC	0	0	NA	NA	NA	4	152.097	2	0.0139129	Output/short456/cleaveLand_result/t_plot/cas-miR394_TRINITY_DN30474_c0_g1_i22_652_TPlot.pdf	0	152.097	-Inf	down	5.9991e-35	1.17839e-34
cas-miR394	TRINITY_DN30474_c0_g1_i26	TRINITY_DN30474_c0_g1	NA	NA	GO:0005765|lysosomal membrane;GO:0005770|late endosome;GO:0016021|integral component of membrane	NA	1050	1070	1061	0.785536	6	GGAGGUGGAGCGGAUGUCAAA&UUUGGCAUUCUGUCCACCUCC	0	0	NA	NA	NA	4	152.097	2	0.0142966	Output/short456/cleaveLand_result/t_plot/cas-miR394_TRINITY_DN30474_c0_g1_i26_1061_TPlot.pdf	0	152.097	-Inf	down	5.9991e-35	1.17839e-34
cas-miR394	TRINITY_DN30474_c0_g1_i33	TRINITY_DN30474_c0_g1	NA	NA	GO:0005765|lysosomal membrane;GO:0005770|late endosome;GO:0016021|integral component of membrane	NA	845	865	856	0.785536	6	GGAGGUGGAGCGGAUGUCAAA&UUUGGCAUUCUGUCCACCUCC	0	0	NA	NA	NA	2	76.0485	3	0.0212987	Output/short456/cleaveLand_result/t_plot/cas-miR394_TRINITY_DN30474_c0_g1_i33_856_TPlot.pdf	0	76.0485	-Inf	down	2.7637e-18	4.06116e-18
cas-miR394	TRINITY_DN30474_c0_g1_i35	TRINITY_DN30474_c0_g1	NA	NA	GO:0005765|lysosomal membrane;GO:0005770|late endosome;GO:0016021|integral component of membrane	NA	1972	1992	1983	0.785536	6	GGAGGUGGAGCGGAUGUCAAA&UUUGGCAUUCUGUCCACCUCC	0	0	NA	NA	NA	2	76.0485	3	0.0237744	Output/short456/cleaveLand_result/t_plot/cas-miR394_TRINITY_DN30474_c0_g1_i35_1983_TPlot.pdf	0	76.0485	-Inf	down	2.7637e-18	4.06116e-18
cas-miR394	TRINITY_DN30474_c0_g1_i37	TRINITY_DN30474_c0_g1	NA	NA	GO:0005765|lysosomal membrane;GO:0005770|late endosome;GO:0016021|integral component of membrane	NA	1124	1144	1135	0.785536	6	GGAGGUGGAGCGGAUGUCAAA&UUUGGCAUUCUGUCCACCUCC	0	0	NA	NA	NA	1	38.0243	4	0.0137905	Output/short456/cleaveLand_result/t_plot/cas-miR394_TRINITY_DN30474_c0_g1_i37_1135_TPlot.pdf	0	38.0243	-Inf	down	6.9845e-10	7.47646e-10
cas-miR394	TRINITY_DN30474_c0_g1_i6	TRINITY_DN30474_c0_g1	NA	NA	GO:0005765|lysosomal membrane;GO:0005770|late endosome;GO:0016021|integral component of membrane	NA	1000	1020	1011	0.785536	6	GGAGGUGGAGCGGAUGUCAAA&UUUGGCAUUCUGUCCACCUCC	0	0	NA	NA	NA	3	114.073	3	0.0250099	Output/short456/cleaveLand_result/t_plot/cas-miR394_TRINITY_DN30474_c0_g1_i6_1011_TPlot.pdf	0	114.073	-Inf	down	1.252e-26	2.10489e-26
cas-miR394	TRINITY_DN30474_c0_g1_i9	TRINITY_DN30474_c0_g1	NA	NA	GO:0005765|lysosomal membrane;GO:0005770|late endosome;GO:0016021|integral component of membrane	NA	1124	1144	1135	0.785536	6	GGAGGUGGAGCGGAUGUCAAA&UUUGGCAUUCUGUCCACCUCC	0	0	NA	NA	NA	2	76.0485	3	0.0194378	Output/short456/cleaveLand_result/t_plot/cas-miR394_TRINITY_DN30474_c0_g1_i9_1135_TPlot.pdf	0	76.0485	-Inf	down	2.7637e-18	4.06116e-18
cas-miR394	TRINITY_DN37852_c0_g1_i8	TRINITY_DN37852_c0_g1	NA	NA	GO:0009651|response to salt stress;GO:0009737|response to abscisic acid;GO:0009853|photorespiration;GO:0010228|vegetative to reproductive phase transition of meristem;GO:0005739|mitochondrion;GO:0005747|mitochondrial respiratory chain complex I;GO:0005774|vacuolar membrane;GO:0005829|cytosol;GO:0031966|mitochondrial membrane;GO:0045271|respiratory chain complex I;GO:0046872|metal ion binding	NA	871	891	882	0.718204	7	GGAGGUGGAGAAGAUGCUGAA&UUUGGCAUUCUGUCCACCUCC	1	64.771	4	0.0601923	Output/long789/cleaveLand_result/t_plot/cas-miR394_TRINITY_DN37852_c0_g1_i8_882_TPlot.pdf	0	0	NA	NA	NA	64.771	0	Inf	up	8.4037e-16	1.0516e-15
cas-miR394	TRINITY_DN37852_c0_g1_i9	TRINITY_DN37852_c0_g1	NA	NA	GO:0009651|response to salt stress;GO:0009737|response to abscisic acid;GO:0009853|photorespiration;GO:0010228|vegetative to reproductive phase transition of meristem;GO:0005739|mitochondrion;GO:0005747|mitochondrial respiratory chain complex I;GO:0005774|vacuolar membrane;GO:0005829|cytosol;GO:0031966|mitochondrial membrane;GO:0045271|respiratory chain complex I;GO:0046872|metal ion binding	NA	871	891	882	0.718204	7	GGAGGUGGAGAAGAUGCUGAA&UUUGGCAUUCUGUCCACCUCC	1	64.771	4	0.0583578	Output/long789/cleaveLand_result/t_plot/cas-miR394_TRINITY_DN37852_c0_g1_i9_882_TPlot.pdf	0	0	NA	NA	NA	64.771	0	Inf	up	8.4037e-16	1.0516e-15
cas-miR394	TRINITY_DN761_c0_g1_i14	TRINITY_DN761_c0_g1	NA	NA	NA	NA	1218	1239	1229	0.690773	5.5	GGUGGAGGGCAGAGAUGCCAGA&UUUGGCAU-UCUGUCCACCUCC	3	194.313	3	0.171549	Output/long789/cleaveLand_result/t_plot/cas-miR394_TRINITY_DN761_c0_g1_i14_1229_TPlot.pdf	0	0	NA	NA	NA	194.313	0	Inf	up	3.6042e-44	8.09893e-44
cas-miR394	TRINITY_DN761_c0_g1_i4	TRINITY_DN761_c0_g1	NA	NA	NA	NA	1688	1709	1699	0.690773	5.5	GGUGGAGGGCAGAGAUGCCAGA&UUUGGCAU-UCUGUCCACCUCC	1	64.771	4	0.0952604	Output/long789/cleaveLand_result/t_plot/cas-miR394_TRINITY_DN761_c0_g1_i4_1699_TPlot.pdf	0	0	NA	NA	NA	64.771	0	Inf	up	8.4037e-16	1.0516e-15
cca-miR156b	TRINITY_DN174703_c0_g1_i2	TRINITY_DN174703_c0_g1	NA	NA	NA	NA	464	485	476	0.674797	6	CUUGCCAAACUCUCUUCUGUUA&UGACAGAAGAGAGU-GAGCAUA	3	194.313	3	0.280497	Output/long789/cleaveLand_result/t_plot/cca-miR156b_TRINITY_DN174703_c0_g1_i2_476_TPlot.pdf	0	0	NA	NA	NA	194.313	0	Inf	up	3.6042e-44	8.09893e-44
cca-miR156b	TRINITY_DN17771_c0_g1_i1	TRINITY_DN17771_c0_g1	NA	NA	NA	NA	12	32	23	0.902439	2.5	CGUGCUCUCUCUCUUCUGUCA&UGACAGAAGAGAGUGAGCAUA	3	194.313	3	0.0215494	Output/long789/cleaveLand_result/t_plot/cca-miR156b_TRINITY_DN17771_c0_g1_i1_23_TPlot.pdf	0	0	NA	NA	NA	194.313	0	Inf	up	3.6042e-44	8.09893e-44
cca-miR156b	TRINITY_DN6217_c0_g1_i3	TRINITY_DN6217_c0_g1	NA	NA	NA	NA	273	293	284	0.764228	5.5	CGUGCUCUCUCUCCUCUGUCG&UGACAGAAGAGAGUGAGCAUA	4	259.084	3	0.0484103	Output/long789/cleaveLand_result/t_plot/cca-miR156b_TRINITY_DN6217_c0_g1_i3_284_TPlot.pdf	1	38.0243	4	0.0320105	Output/short456/cleaveLand_result/t_plot/cca-miR156b_TRINITY_DN6217_c0_g1_i3_284_TPlot.pdf	259.084	38.0243	2.76843	up	1.1756e-37	2.42901e-37
cca-miR156b	TRINITY_DN6217_c0_g1_i7	TRINITY_DN6217_c0_g1	NA	NA	NA	NA	273	293	284	0.764228	5.5	CGUGCUCUCUCUCCUCUGUCG&UGACAGAAGAGAGUGAGCAUA	1	64.771	4	0.0259836	Output/long789/cleaveLand_result/t_plot/cca-miR156b_TRINITY_DN6217_c0_g1_i7_284_TPlot.pdf	1	38.0243	4	0.0316264	Output/short456/cleaveLand_result/t_plot/cca-miR156b_TRINITY_DN6217_c0_g1_i7_284_TPlot.pdf	64.771	38.0243	0.768429	up	0.0083365	0.00847593
cca-miR156b	TRINITY_DN6217_c0_g1_i8	TRINITY_DN6217_c0_g1	NA	NA	NA	NA	273	293	284	0.764228	5.5	CGUGCUCUCUCUCCUCUGUCG&UGACAGAAGAGAGUGAGCAUA	3	194.313	3	0.048986	Output/long789/cleaveLand_result/t_plot/cca-miR156b_TRINITY_DN6217_c0_g1_i8_284_TPlot.pdf	1	38.0243	4	0.0323945	Output/short456/cleaveLand_result/t_plot/cca-miR156b_TRINITY_DN6217_c0_g1_i8_284_TPlot.pdf	194.313	38.0243	2.35339	up	1.1354e-24	1.84702e-24
cca-miR156b	TRINITY_DN66807_c0_g1_i2	TRINITY_DN66807_c0_g1	NA	NA	GO:0009651|response to salt stress;GO:0010182|sugar mediated signaling pathway;GO:0005634|nucleus;GO:0005739|mitochondrion;GO:0004672|protein kinase activity;GO:0004712|protein serine/threonine/tyrosine kinase activity;GO:0005524|ATP binding;GO:0106310|protein serine kinase activity;GO:0106311|protein threonine kinase activity	NA	2384	2405	2395	0.712737	5	GAUGUUUACUCUUUUGCUGUCA&UGACAG-AAGAGAGUGAGCAUA	5	323.855	3	0.134132	Output/long789/cleaveLand_result/t_plot/cca-miR156b_TRINITY_DN66807_c0_g1_i2_2395_TPlot.pdf	0	0	NA	NA	NA	323.855	0	Inf	up	2.0406e-72	7.88259e-72
cca-miR156b	TRINITY_DN9504_c0_g1_i1	TRINITY_DN9504_c0_g1	NA	NA	GO:0005886|plasma membrane;GO:0016021|integral component of membrane;GO:0005524|ATP binding;GO:0106310|protein serine kinase activity;GO:0106311|protein threonine kinase activity	NA	1946	1966	1957	0.902439	2.5	CGUGCUCUCUCUCUUCUGUCA&UGACAGAAGAGAGUGAGCAUA	1	64.771	4	0.00905945	Output/long789/cleaveLand_result/t_plot/cca-miR156b_TRINITY_DN9504_c0_g1_i1_1957_TPlot.pdf	0	0	NA	NA	NA	64.771	0	Inf	up	8.4037e-16	1.0516e-15
cca-miR156b	TRINITY_DN9504_c0_g1_i11	TRINITY_DN9504_c0_g1	NA	NA	GO:0005886|plasma membrane;GO:0016021|integral component of membrane;GO:0005524|ATP binding;GO:0106310|protein serine kinase activity;GO:0106311|protein threonine kinase activity	NA	1729	1749	1740	0.902439	2.5	CGUGCUCUCUCUCUUCUGUCA&UGACAGAAGAGAGUGAGCAUA	3	194.313	3	0.0173959	Output/long789/cleaveLand_result/t_plot/cca-miR156b_TRINITY_DN9504_c0_g1_i11_1740_TPlot.pdf	0	0	NA	NA	NA	194.313	0	Inf	up	3.6042e-44	8.09893e-44
cca-miR156b	TRINITY_DN9504_c0_g1_i6	TRINITY_DN9504_c0_g1	NA	NA	GO:0005886|plasma membrane;GO:0016021|integral component of membrane;GO:0005524|ATP binding;GO:0106310|protein serine kinase activity;GO:0106311|protein threonine kinase activity	NA	813	833	824	0.902439	2.5	CGUGCUCUCUCUCUUCUGUCA&UGACAGAAGAGAGUGAGCAUA	3	194.313	3	0.0191781	Output/long789/cleaveLand_result/t_plot/cca-miR156b_TRINITY_DN9504_c0_g1_i6_824_TPlot.pdf	0	0	NA	NA	NA	194.313	0	Inf	up	3.6042e-44	8.09893e-44
cca-miR164	TRINITY_DN6866_c0_g3_i1	TRINITY_DN6866_c0_g3	NA	NA	NA	NA	44	66	56	0.652482	7	UGCACGCUCCCCUGCAUUCUCGA&UGGAGAA-GCAGGG-UACGUGCA	6	388.626	3	0.392273	Output/long789/cleaveLand_result/t_plot/cca-miR164_TRINITY_DN6866_c0_g3_i1_56_TPlot.pdf	0	0	NA	NA	NA	388.626	0	Inf	up	1.5868e-86	7.5422e-86
cca-miR164	TRINITY_DN6866_c0_g3_i4	TRINITY_DN6866_c0_g3	NA	NA	NA	NA	44	66	56	0.652482	7	UGCACGCUCCCCUGCAUUCUCGA&UGGAGAA-GCAGGG-UACGUGCA	8	518.168	3	0.383755	Output/long789/cleaveLand_result/t_plot/cca-miR164_TRINITY_DN6866_c0_g3_i4_56_TPlot.pdf	2	76.0485	3	0.397435	Output/short456/cleaveLand_result/t_plot/cca-miR164_TRINITY_DN6866_c0_g3_i4_56_TPlot.pdf	518.168	76.0485	2.76843	up	1.5465e-73	6.40218e-73
cca-miR164	TRINITY_DN6866_c0_g3_i5	TRINITY_DN6866_c0_g3	NA	NA	NA	NA	44	66	56	0.652482	7	UGCACGCUCCCCUGCAUUCUCGA&UGGAGAA-GCAGGG-UACGUGCA	11	712.481	3	0.393742	Output/long789/cleaveLand_result/t_plot/cca-miR164_TRINITY_DN6866_c0_g3_i5_56_TPlot.pdf	4	152.097	3	0.407649	Output/short456/cleaveLand_result/t_plot/cca-miR164_TRINITY_DN6866_c0_g3_i5_56_TPlot.pdf	712.481	152.097	2.22786	up	5.1837e-81	2.32061e-80
cca-miR164	TRINITY_DN6866_c0_g3_i6	TRINITY_DN6866_c0_g3	NA	NA	NA	NA	44	66	56	0.652482	7	UGCACGCUCCCCUGCAUUCUCGA&UGGAGAA-GCAGGG-UACGUGCA	7	453.397	2	0.246446	Output/long789/cleaveLand_result/t_plot/cca-miR164_TRINITY_DN6866_c0_g3_i6_56_TPlot.pdf	5	190.121	0	0.0742729	Output/short456/cleaveLand_result/t_plot/cca-miR164_TRINITY_DN6866_c0_g3_i6_56_TPlot.pdf	453.397	190.121	1.25386	up	3.0553e-25	5.12917e-25
cca-miR169b	TRINITY_DN31946_c0_g1_i1	TRINITY_DN31946_c0_g1	NA	NA	GO:0018105|peptidyl-serine phosphorylation;GO:0035556|intracellular signal transduction;GO:0046777|protein autophosphorylation;GO:0005634|nucleus;GO:0005737|cytoplasm;GO:0005509|calcium ion binding;GO:0005516|calmodulin binding;GO:0005524|ATP binding;GO:0009931|calcium-dependent protein serine/threonine kinase activity;GO:0106310|protein serine kinase activity;GO:0106311|protein threonine kinase …	ko04626	241	260	251	0.696335	6.5	GUA-CAGGUCAUCCUUGGAUU&UAGCCAAGGAUGACUUGCUAC	0	0	NA	NA	NA	3	114.073	3	0.110541	Output/short456/cleaveLand_result/t_plot/cca-miR169b_TRINITY_DN31946_c0_g1_i1_251_TPlot.pdf	0	114.073	-Inf	down	1.252e-26	2.10489e-26
cca-miR6111-5p	TRINITY_DN1234_c0_g2_i6	TRINITY_DN1234_c0_g2	NA	NA	NA	NA	1646	1668	1659	0.651163	5	CUCAUUACAUCCUGACAUAAAGG&UCUUUAUGUCACGAUGUA-UGAC	2	129.542	3	0.212608	Output/long789/cleaveLand_result/t_plot/cca-miR6111-5p_TRINITY_DN1234_c0_g2_i6_1659_TPlot.pdf	0	0	NA	NA	NA	129.542	0	Inf	up	5.1393e-30	9.14621e-30
cca-miR6111-5p	TRINITY_DN1234_c0_g2_i7	TRINITY_DN1234_c0_g2	NA	NA	NA	NA	1646	1668	1659	0.651163	5	CUCAUUACAUCCUGACAUAAAGG&UCUUUAUGUCACGAUGUA-UGAC	1	64.771	4	0.121628	Output/long789/cleaveLand_result/t_plot/cca-miR6111-5p_TRINITY_DN1234_c0_g2_i7_1659_TPlot.pdf	0	0	NA	NA	NA	64.771	0	Inf	up	8.4037e-16	1.0516e-15
cca-miR6111-5p	TRINITY_DN13053_c0_g1_i1	TRINITY_DN13053_c0_g1	NA	NA	GO:0046777|protein autophosphorylation;GO:0005886|plasma membrane;GO:0009506|plasmodesma;GO:0016021|integral component of membrane;GO:0016324|apical plasma membrane;GO:0090404|pollen tube tip;GO:0004672|protein kinase activity;GO:0005524|ATP binding;GO:0106310|protein serine kinase activity;GO:0106311|protein threonine kinase activity	NA	32	55	44	0.828488	6	GUCAUACAUCGUGACGUCAAAAGC&UCUUU--AUGUCACGAUGUAUGAC	0	0	NA	NA	NA	11	418.267	3	0.0200585	Output/short456/cleaveLand_result/t_plot/cca-miR6111-5p_TRINITY_DN13053_c0_g1_i1_44_TPlot.pdf	0	418.267	-Inf	down	0	0
cca-miR6111-5p	TRINITY_DN29966_c0_g1_i13	TRINITY_DN29966_c0_g1	NA	NA	GO:0006468|protein phosphorylation;GO:0005886|plasma membrane;GO:0009536|plastid;GO:0016021|integral component of membrane;GO:0005524|ATP binding;GO:0106310|protein serine kinase activity;GO:0106311|protein threonine kinase activity	NA	885	906	897	0.723837	6	GUCAUACAUCGAGACUUGAAGU&UCUUUAUGUCACGAUGUAUGAC	2	129.542	1	0.00193744	Output/long789/cleaveLand_result/t_plot/cca-miR6111-5p_TRINITY_DN29966_c0_g1_i13_897_TPlot.pdf	0	0	NA	NA	NA	129.542	0	Inf	up	5.1393e-30	9.14621e-30
cca-miR6111-5p	TRINITY_DN29966_c0_g1_i15	TRINITY_DN29966_c0_g1	NA	NA	GO:0006468|protein phosphorylation;GO:0005886|plasma membrane;GO:0009536|plastid;GO:0016021|integral component of membrane;GO:0005524|ATP binding;GO:0106310|protein serine kinase activity;GO:0106311|protein threonine kinase activity	NA	893	914	905	0.723837	6	GUCAUACAUCGAGACUUGAAGU&UCUUUAUGUCACGAUGUAUGAC	1	64.771	4	0.033552	Output/long789/cleaveLand_result/t_plot/cca-miR6111-5p_TRINITY_DN29966_c0_g1_i15_905_TPlot.pdf	0	0	NA	NA	NA	64.771	0	Inf	up	8.4037e-16	1.0516e-15
cca-miR6111-5p	TRINITY_DN29966_c0_g1_i7	TRINITY_DN29966_c0_g1	NA	NA	GO:0006468|protein phosphorylation;GO:0005886|plasma membrane;GO:0009536|plastid;GO:0016021|integral component of membrane;GO:0005524|ATP binding;GO:0106310|protein serine kinase activity;GO:0106311|protein threonine kinase activity	NA	1012	1033	1024	0.723837	6	GUCAUACAUCGAGACUUGAAGU&UCUUUAUGUCACGAUGUAUGAC	1	64.771	4	0.0322947	Output/long789/cleaveLand_result/t_plot/cca-miR6111-5p_TRINITY_DN29966_c0_g1_i7_1024_TPlot.pdf	0	0	NA	NA	NA	64.771	0	Inf	up	8.4037e-16	1.0516e-15
cca-miR6111-5p	TRINITY_DN449_c0_g1_i19	TRINITY_DN449_c0_g1	NA	NA	GO:0048544|recognition of pollen;GO:0016021|integral component of membrane;GO:0005524|ATP binding;GO:0106310|protein serine kinase activity;GO:0106311|protein threonine kinase activity	NA	1811	1832	1823	0.677326	7	GUUCUACAUUGUGACGUGAAAC&UCUUUAUGUCACGAUGUAUGAC	1	64.771	4	0.0693117	Output/long789/cleaveLand_result/t_plot/cca-miR6111-5p_TRINITY_DN449_c0_g1_i19_1823_TPlot.pdf	0	0	NA	NA	NA	64.771	0	Inf	up	8.4037e-16	1.0516e-15
cca-miR6111-5p	TRINITY_DN449_c0_g1_i20	TRINITY_DN449_c0_g1	NA	NA	GO:0048544|recognition of pollen;GO:0016021|integral component of membrane;GO:0005524|ATP binding;GO:0106310|protein serine kinase activity;GO:0106311|protein threonine kinase activity	NA	1962	1983	1974	0.677326	7	GUUCUACAUUGUGACGUGAAAC&UCUUUAUGUCACGAUGUAUGAC	3	194.313	3	0.126237	Output/long789/cleaveLand_result/t_plot/cca-miR6111-5p_TRINITY_DN449_c0_g1_i20_1974_TPlot.pdf	0	0	NA	NA	NA	194.313	0	Inf	up	3.6042e-44	8.09893e-44
cca-miR6111-5p	TRINITY_DN449_c0_g1_i28	TRINITY_DN449_c0_g1	NA	NA	GO:0048544|recognition of pollen;GO:0016021|integral component of membrane;GO:0005524|ATP binding;GO:0106310|protein serine kinase activity;GO:0106311|protein threonine kinase activity	NA	1811	1832	1823	0.677326	7	GUUCUACAUUGUGACGUGAAAC&UCUUUAUGUCACGAUGUAUGAC	2	129.542	3	0.130457	Output/long789/cleaveLand_result/t_plot/cca-miR6111-5p_TRINITY_DN449_c0_g1_i28_1823_TPlot.pdf	0	0	NA	NA	NA	129.542	0	Inf	up	5.1393e-30	9.14621e-30
cca-miR6111-5p	TRINITY_DN449_c0_g1_i3	TRINITY_DN449_c0_g1	NA	NA	GO:0048544|recognition of pollen;GO:0016021|integral component of membrane;GO:0005524|ATP binding;GO:0106310|protein serine kinase activity;GO:0106311|protein threonine kinase activity	NA	1962	1983	1974	0.677326	7	GUUCUACAUUGUGACGUGAAAC&UCUUUAUGUCACGAUGUAUGAC	3	194.313	3	0.124649	Output/long789/cleaveLand_result/t_plot/cca-miR6111-5p_TRINITY_DN449_c0_g1_i3_1974_TPlot.pdf	0	0	NA	NA	NA	194.313	0	Inf	up	3.6042e-44	8.09893e-44
cca-miR6111-5p	TRINITY_DN53797_c0_g1_i13	TRINITY_DN53797_c0_g1	NA	NA	GO:0009723|response to ethylene;GO:0009738|abscisic acid-activated signaling pathway;GO:0009741|response to brassinosteroid;GO:0009742|brassinosteroid mediated signaling pathway;GO:0009788|negative regulation of abscisic acid-activated signaling pathway;GO:0009791|post-embryonic development;GO:0009873|ethylene-activated signaling pathway;GO:0010118|stomatal movement;GO:0010483|pollen tube recepti…	NA	13	34	25	0.848837	4	GUCAUACAUCGUGAUGUCAAGA&UCUUUAUGUCACGAUGUAUGAC	1	64.771	4	0.00744773	Output/long789/cleaveLand_result/t_plot/cca-miR6111-5p_TRINITY_DN53797_c0_g1_i13_25_TPlot.pdf	23	874.558	3	0.0144581	Output/short456/cleaveLand_result/t_plot/cca-miR6111-5p_TRINITY_DN53797_c0_g1_i13_25_TPlot.pdf	64.771	874.558	-3.75513	down	0	0
cca-miR6111-5p	TRINITY_DN53797_c0_g1_i8	TRINITY_DN53797_c0_g1	NA	NA	GO:0046777|protein autophosphorylation;GO:0005886|plasma membrane;GO:0009506|plasmodesma;GO:0016021|integral component of membrane;GO:0016324|apical plasma membrane;GO:0090404|pollen tube tip;GO:0004672|protein kinase activity;GO:0005524|ATP binding;GO:0106310|protein serine kinase activity;GO:0106311|protein threonine kinase activity	NA	13	34	25	0.848837	4	GUCAUACAUCGUGAUGUCAAGA&UCUUUAUGUCACGAUGUAUGAC	0	0	NA	NA	NA	15	570.364	3	0.0150819	Output/short456/cleaveLand_result/t_plot/cca-miR6111-5p_TRINITY_DN53797_c0_g1_i8_25_TPlot.pdf	0	570.364	-Inf	down	0	0
cca-miR6114-5p	TRINITY_DN260_c2_g1_i11	TRINITY_DN260_c2_g1	NA	NA	NA	NA	1094	1116	1107	0.708709	4	UCACGCCUUCUUGAUUCCUUUCC&UGAAAGGAAUCAUGAA--CGUGA	1	64.771	4	0.0259836	Output/long789/cleaveLand_result/t_plot/cca-miR6114-5p_TRINITY_DN260_c2_g1_i11_1107_TPlot.pdf	0	0	NA	NA	NA	64.771	0	Inf	up	8.4037e-16	1.0516e-15
cca-miR6114-5p	TRINITY_DN260_c2_g1_i12	TRINITY_DN260_c2_g1	NA	NA	NA	NA	1171	1193	1184	0.708709	4	UCACGCCUUCUUGAUUCCUUUCC&UGAAAGGAAUCAUGAA--CGUGA	1	64.771	4	0.0247164	Output/long789/cleaveLand_result/t_plot/cca-miR6114-5p_TRINITY_DN260_c2_g1_i12_1184_TPlot.pdf	0	0	NA	NA	NA	64.771	0	Inf	up	8.4037e-16	1.0516e-15
cca-miR6114-5p	TRINITY_DN260_c2_g1_i16	TRINITY_DN260_c2_g1	NA	NA	NA	NA	2206	2228	2219	0.708709	4	UCACGCCUUCUUGAUUCCUUUCC&UGAAAGGAAUCAUGAA--CGUGA	1	64.771	4	0.0272491	Output/long789/cleaveLand_result/t_plot/cca-miR6114-5p_TRINITY_DN260_c2_g1_i16_2219_TPlot.pdf	0	0	NA	NA	NA	64.771	0	Inf	up	8.4037e-16	1.0516e-15
cca-miR6114-5p	TRINITY_DN260_c2_g1_i8	TRINITY_DN260_c2_g1	NA	NA	NA	NA	1547	1569	1560	0.708709	4	UCACGCCUUCUUGAUUCCUUUCC&UGAAAGGAAUCAUGAA--CGUGA	2	129.542	2	0.0256125	Output/long789/cleaveLand_result/t_plot/cca-miR6114-5p_TRINITY_DN260_c2_g1_i8_1560_TPlot.pdf	0	0	NA	NA	NA	129.542	0	Inf	up	5.1393e-30	9.14621e-30
cme-miR167e	TRINITY_DN705_c0_g1_i2	TRINITY_DN705_c0_g1	NA	NA	GO:0005634|nucleus;GO:0005829|cytosol;GO:0008194|UDP-glycosyltransferase activity;GO:0102970|7-deoxyloganetic acid glucosyltransferase activity	NA	1607	1627	1618	0.658098	6	UCUGUCGUUCUGGCAGCUUGU&UCAAGCUGCCAGCAUGAUCUA	1	64.771	4	0.135226	Output/long789/cleaveLand_result/t_plot/cme-miR167e_TRINITY_DN705_c0_g1_i2_1618_TPlot.pdf	0	0	NA	NA	NA	64.771	0	Inf	up	8.4037e-16	1.0516e-15
cme-miR167e	TRINITY_DN705_c0_g1_i3	TRINITY_DN705_c0_g1	NA	NA	GO:0005634|nucleus;GO:0005829|cytosol;GO:0008194|UDP-glycosyltransferase activity;GO:0102970|7-deoxyloganetic acid glucosyltransferase activity	NA	783	803	794	0.658098	6	UCUGUCGUUCUGGCAGCUUGU&UCAAGCUGCCAGCAUGAUCUA	1	64.771	4	0.136349	Output/long789/cleaveLand_result/t_plot/cme-miR167e_TRINITY_DN705_c0_g1_i3_794_TPlot.pdf	0	0	NA	NA	NA	64.771	0	Inf	up	8.4037e-16	1.0516e-15
cme-miR167e	TRINITY_DN705_c0_g1_i4	TRINITY_DN705_c0_g1	NA	NA	GO:1900994|(-)-secologanin biosynthetic process;GO:0035251|UDP-glucosyltransferase activity;GO:0102970|7-deoxyloganetic acid glucosyltransferase activity	NA	2921	2941	2932	0.658098	6	UCUGUCGUUCUGGCAGCUUGU&UCAAGCUGCCAGCAUGAUCUA	1	64.771	4	0.14027	Output/long789/cleaveLand_result/t_plot/cme-miR167e_TRINITY_DN705_c0_g1_i4_2932_TPlot.pdf	0	0	NA	NA	NA	64.771	0	Inf	up	8.4037e-16	1.0516e-15
cme-miR167e	TRINITY_DN705_c0_g1_i6	TRINITY_DN705_c0_g1	NA	NA	GO:1900994|(-)-secologanin biosynthetic process;GO:0035251|UDP-glucosyltransferase activity;GO:0102970|7-deoxyloganetic acid glucosyltransferase activity	NA	2921	2941	2932	0.658098	6	UCUGUCGUUCUGGCAGCUUGU&UCAAGCUGCCAGCAUGAUCUA	1	64.771	4	0.137191	Output/long789/cleaveLand_result/t_plot/cme-miR167e_TRINITY_DN705_c0_g1_i6_2932_TPlot.pdf	0	0	NA	NA	NA	64.771	0	Inf	up	8.4037e-16	1.0516e-15
cme-miR167e	TRINITY_DN705_c0_g1_i9	TRINITY_DN705_c0_g1	NA	NA	GO:1900994|(-)-secologanin biosynthetic process;GO:0035251|UDP-glucosyltransferase activity;GO:0102970|7-deoxyloganetic acid glucosyltransferase activity	NA	2049	2069	2060	0.658098	6	UCUGUCGUUCUGGCAGCUUGU&UCAAGCUGCCAGCAUGAUCUA	1	64.771	4	0.142503	Output/long789/cleaveLand_result/t_plot/cme-miR167e_TRINITY_DN705_c0_g1_i9_2060_TPlot.pdf	0	0	NA	NA	NA	64.771	0	Inf	up	8.4037e-16	1.0516e-15
cme-miR168	TRINITY_DN11951_c0_g2_i2	TRINITY_DN11951_c0_g2	NA	NA	GO:0009624|response to nematode;GO:0005886|plasma membrane	ko04626	596	616	607	0.651054	7	UAGCGAUCCUGCAUCAGGUGA&UCGCUUGGUGCAGG-UCGGGA	9	582.939	2	0.378393	Output/long789/cleaveLand_result/t_plot/cme-miR168_TRINITY_DN11951_c0_g2_i2_607_TPlot.pdf	0	0	NA	NA	NA	582.939	0	Inf	up	0	0
cme-miR168	TRINITY_DN11951_c0_g2_i4	TRINITY_DN11951_c0_g2	NA	NA	GO:0002237|response to molecule of bacterial origin;GO:0006468|protein phosphorylation;GO:0009626|plant-type hypersensitive response;GO:0034051|negative regulation of plant-type hypersensitive response;GO:0005829|cytosol;GO:0005886|plasma membrane;GO:0012505|endomembrane system;GO:0016020|membrane;GO:0019897|extrinsic component of plasma membrane	ko04626	596	616	607	0.651054	7	UAGCGAUCCUGCAUCAGGUGA&UCGCUUGGUGCAGG-UCGGGA	14	906.794	0	0.117477	Output/long789/cleaveLand_result/t_plot/cme-miR168_TRINITY_DN11951_c0_g2_i4_607_TPlot.pdf	0	0	NA	NA	NA	906.794	0	Inf	up	0	0
cme-miR168	TRINITY_DN11951_c0_g2_i8	TRINITY_DN11951_c0_g2	NA	NA	GO:0009624|response to nematode;GO:0005886|plasma membrane	ko04626	596	616	607	0.651054	7	UAGCGAUCCUGCAUCAGGUGA&UCGCUUGGUGCAGG-UCGGGA	14	906.794	2	0.37621	Output/long789/cleaveLand_result/t_plot/cme-miR168_TRINITY_DN11951_c0_g2_i8_607_TPlot.pdf	0	0	NA	NA	NA	906.794	0	Inf	up	0	0
cme-miR168	TRINITY_DN2640_c1_g1_i1	TRINITY_DN2640_c1_g1	NA	NA	GO:0006417|regulation of translation;GO:0009616|RNAi-mediated antiviral immune response;GO:0009733|response to auxin;GO:0009850|auxin metabolic process;GO:0009955|adaxial/abaxial pattern specification;GO:0009965|leaf morphogenesis;GO:0010218|response to far red light;GO:0010305|leaf vascular tissue pattern formation;GO:0010589|leaf proximal/distal pattern formation;GO:0016032|viral process;GO:001…	NA	639	658	649	0.826698	5	CCCCGAGCUGCACCAAGCUA&UCGCUUGGUGCAGGUCGGGA	3	194.313	3	0.0150146	Output/long789/cleaveLand_result/t_plot/cme-miR168_TRINITY_DN2640_c1_g1_i1_649_TPlot.pdf	0	0	NA	NA	NA	194.313	0	Inf	up	3.6042e-44	8.09893e-44
cme-miR168	TRINITY_DN2640_c1_g1_i2	TRINITY_DN2640_c1_g1	NA	NA	GO:0006417|regulation of translation;GO:0009616|RNAi-mediated antiviral immune response;GO:0009733|response to auxin;GO:0009850|auxin metabolic process;GO:0009955|adaxial/abaxial pattern specification;GO:0009965|leaf morphogenesis;GO:0010218|response to far red light;GO:0010305|leaf vascular tissue pattern formation;GO:0010589|leaf proximal/distal pattern formation;GO:0016032|viral process;GO:001…	NA	639	658	649	0.826698	5	CCCCGAGCUGCACCAAGCUA&UCGCUUGGUGCAGGUCGGGA	3	194.313	3	0.0144184	Output/long789/cleaveLand_result/t_plot/cme-miR168_TRINITY_DN2640_c1_g1_i2_649_TPlot.pdf	0	0	NA	NA	NA	194.313	0	Inf	up	3.6042e-44	8.09893e-44
cme-miR168	TRINITY_DN5396_c0_g1_i12	TRINITY_DN5396_c0_g1	NA	NA	NA	NA	2031	2050	2041	0.772834	6	UUACGACCUGCACCAAGCAU&UCGCUUGGUGCAGGUCGGGA	0	0	NA	NA	NA	2	76.0485	3	0.0541975	Output/short456/cleaveLand_result/t_plot/cme-miR168_TRINITY_DN5396_c0_g1_i12_2041_TPlot.pdf	0	76.0485	-Inf	down	2.7637e-18	4.06116e-18
cme-miR168	TRINITY_DN5396_c0_g1_i9	TRINITY_DN5396_c0_g1	NA	NA	NA	NA	1731	1750	1741	0.772834	6	UUACGACCUGCACCAAGCAU&UCGCUUGGUGCAGGUCGGGA	0	0	NA	NA	NA	2	76.0485	3	0.0535985	Output/short456/cleaveLand_result/t_plot/cme-miR168_TRINITY_DN5396_c0_g1_i9_1741_TPlot.pdf	0	76.0485	-Inf	down	2.7637e-18	4.06116e-18
csi-miR156d-5p	TRINITY_DN17771_c0_g1_i1	TRINITY_DN17771_c0_g1	NA	NA	NA	NA	13	32	23	0.883152	2.5	GUGCUCUCUCUCUUCUGUCA&UGACAGAAGAUAGAGAGCGC	3	194.313	3	0.00422701	Output/long789/cleaveLand_result/t_plot/csi-miR156d-5p_TRINITY_DN17771_c0_g1_i1_23_TPlot.pdf	0	0	NA	NA	NA	194.313	0	Inf	up	3.6042e-44	8.09893e-44
csi-miR156d-5p	TRINITY_DN6217_c0_g1_i3	TRINITY_DN6217_c0_g1	NA	NA	NA	NA	274	293	284	0.744565	5.5	GUGCUCUCUCUCCUCUGUCG&UGACAGAAGAUAGAGAGCGC	4	259.084	3	0.0455267	Output/long789/cleaveLand_result/t_plot/csi-miR156d-5p_TRINITY_DN6217_c0_g1_i3_284_TPlot.pdf	1	38.0243	4	0.0300884	Output/short456/cleaveLand_result/t_plot/csi-miR156d-5p_TRINITY_DN6217_c0_g1_i3_284_TPlot.pdf	259.084	38.0243	2.76843	up	1.1756e-37	2.42901e-37
csi-miR156d-5p	TRINITY_DN6217_c0_g1_i7	TRINITY_DN6217_c0_g1	NA	NA	NA	NA	274	293	284	0.744565	5.5	GUGCUCUCUCUCCUCUGUCG&UGACAGAAGAUAGAGAGCGC	1	64.771	4	0.0243994	Output/long789/cleaveLand_result/t_plot/csi-miR156d-5p_TRINITY_DN6217_c0_g1_i7_284_TPlot.pdf	1	38.0243	4	0.0297035	Output/short456/cleaveLand_result/t_plot/csi-miR156d-5p_TRINITY_DN6217_c0_g1_i7_284_TPlot.pdf	64.771	38.0243	0.768429	up	0.0083365	0.00847593
csi-miR156d-5p	TRINITY_DN6217_c0_g1_i8	TRINITY_DN6217_c0_g1	NA	NA	NA	NA	274	293	284	0.744565	5.5	GUGCUCUCUCUCCUCUGUCG&UGACAGAAGAUAGAGAGCGC	3	194.313	3	0.0484103	Output/long789/cleaveLand_result/t_plot/csi-miR156d-5p_TRINITY_DN6217_c0_g1_i8_284_TPlot.pdf	1	38.0243	4	0.0320105	Output/short456/cleaveLand_result/t_plot/csi-miR156d-5p_TRINITY_DN6217_c0_g1_i8_284_TPlot.pdf	194.313	38.0243	2.35339	up	1.1354e-24	1.84702e-24
csi-miR156d-5p	TRINITY_DN9504_c0_g1_i1	TRINITY_DN9504_c0_g1	NA	NA	GO:0005886|plasma membrane;GO:0016021|integral component of membrane;GO:0005524|ATP binding;GO:0106310|protein serine kinase activity;GO:0106311|protein threonine kinase activity	NA	1947	1966	1957	0.883152	2.5	GUGCUCUCUCUCUUCUGUCA&UGACAGAAGAUAGAGAGCGC	1	64.771	4	0.000974604	Output/long789/cleaveLand_result/t_plot/csi-miR156d-5p_TRINITY_DN9504_c0_g1_i1_1957_TPlot.pdf	0	0	NA	NA	NA	64.771	0	Inf	up	8.4037e-16	1.0516e-15
csi-miR156d-5p	TRINITY_DN9504_c0_g1_i11	TRINITY_DN9504_c0_g1	NA	NA	GO:0005886|plasma membrane;GO:0016021|integral component of membrane;GO:0005524|ATP binding;GO:0106310|protein serine kinase activity;GO:0106311|protein threonine kinase activity	NA	1730	1749	1740	0.883152	2.5	GUGCUCUCUCUCUUCUGUCA&UGACAGAAGAUAGAGAGCGC	3	194.313	3	0.00241763	Output/long789/cleaveLand_result/t_plot/csi-miR156d-5p_TRINITY_DN9504_c0_g1_i11_1740_TPlot.pdf	0	0	NA	NA	NA	194.313	0	Inf	up	3.6042e-44	8.09893e-44
csi-miR156d-5p	TRINITY_DN9504_c0_g1_i6	TRINITY_DN9504_c0_g1	NA	NA	GO:0005886|plasma membrane;GO:0016021|integral component of membrane;GO:0005524|ATP binding;GO:0106310|protein serine kinase activity;GO:0106311|protein threonine kinase activity	NA	814	833	824	0.883152	2.5	GUGCUCUCUCUCUUCUGUCA&UGACAGAAGAUAGAGAGCGC	3	194.313	3	0.00302112	Output/long789/cleaveLand_result/t_plot/csi-miR156d-5p_TRINITY_DN9504_c0_g1_i6_824_TPlot.pdf	0	0	NA	NA	NA	194.313	0	Inf	up	3.6042e-44	8.09893e-44
csi-miR159a-5p	TRINITY_DN230_c7_g1_i1	TRINITY_DN230_c7_g1	NA	NA	GO:0000271|polysaccharide biosynthetic process;GO:0009969|xyloglucan biosynthetic process;GO:0010411|xyloglucan metabolic process;GO:0000138|Golgi trans cisterna;GO:0000139|Golgi membrane;GO:0005768|endosome;GO:0005794|Golgi apparatus;GO:0005802|trans-Golgi network;GO:0005829|cytosol;GO:0016021|integral component of membrane;GO:0016758|transferase activity, transferring hexosyl groups;GO:0033843|…	NA	293	313	304	0.693767	7	GAGCAGGACUUCAAGGAGAUC&GAGCUCCUUGAAGUCCAAAAG	2	129.542	3	0.109152	Output/long789/cleaveLand_result/t_plot/csi-miR159a-5p_TRINITY_DN230_c7_g1_i1_304_TPlot.pdf	0	0	NA	NA	NA	129.542	0	Inf	up	5.1393e-30	9.14621e-30
csi-miR159a-5p	TRINITY_DN3066_c0_g1_i5	TRINITY_DN3066_c0_g1	NA	NA	NA	NA	28	47	39	0.674797	7	UUCUUGGACUUU-AGGAGCUG&GAGCUCCUUGAAGUCCAAAAG	2	129.542	3	0.153304	Output/long789/cleaveLand_result/t_plot/csi-miR159a-5p_TRINITY_DN3066_c0_g1_i5_39_TPlot.pdf	0	0	NA	NA	NA	129.542	0	Inf	up	5.1393e-30	9.14621e-30
csi-miR159a-5p	TRINITY_DN3066_c0_g2_i1	TRINITY_DN3066_c0_g2	NA	NA	GO:0009901|anther dehiscence;GO:0010584|pollen exine formation;GO:0016021|integral component of membrane;GO:0005524|ATP binding;GO:0102485|dATP phosphohydrolase activity;GO:0102486|dCTP phosphohydrolase activity;GO:0102487|dUTP phosphohydrolase activity;GO:0102488|dTTP phosphohydrolase activity;GO:0102489|GTP phosphohydrolase activity;GO:0102490|8-oxo-dGTP phosphohydrolase activity;GO:0102491|dGT…	NA	1883	1902	1894	0.674797	7	UUCUUGGACUUU-AGGAGCUG&GAGCUCCUUGAAGUCCAAAAG	2	129.542	3	0.149709	Output/long789/cleaveLand_result/t_plot/csi-miR159a-5p_TRINITY_DN3066_c0_g2_i1_1894_TPlot.pdf	0	0	NA	NA	NA	129.542	0	Inf	up	5.1393e-30	9.14621e-30
csi-miR159a-5p	TRINITY_DN3066_c0_g2_i2	TRINITY_DN3066_c0_g2	NA	NA	GO:0009901|anther dehiscence;GO:0010584|pollen exine formation;GO:0016021|integral component of membrane;GO:0005524|ATP binding;GO:0102485|dATP phosphohydrolase activity;GO:0102486|dCTP phosphohydrolase activity;GO:0102487|dUTP phosphohydrolase activity;GO:0102488|dTTP phosphohydrolase activity;GO:0102489|GTP phosphohydrolase activity;GO:0102490|8-oxo-dGTP phosphohydrolase activity;GO:0102491|dGT…	NA	1808	1827	1819	0.674797	7	UUCUUGGACUUU-AGGAGCUG&GAGCUCCUUGAAGUCCAAAAG	1	64.771	4	0.0896559	Output/long789/cleaveLand_result/t_plot/csi-miR159a-5p_TRINITY_DN3066_c0_g2_i2_1819_TPlot.pdf	0	0	NA	NA	NA	64.771	0	Inf	up	8.4037e-16	1.0516e-15
csi-miR159b-5p	TRINITY_DN26382_c0_g1_i1	TRINITY_DN26382_c0_g1	NA	NA	NA	NA	283	301	292	0.654354	6	UGAAUG--UGGGUCGGUGGUU&AGCUGCCGACUCAUUCAUUCA	0	0	NA	NA	NA	10	380.243	3	0.365724	Output/short456/cleaveLand_result/t_plot/csi-miR159b-5p_TRINITY_DN26382_c0_g1_i1_292_TPlot.pdf	0	380.243	-Inf	down	1.0627e-84	4.7946e-84
csi-miR159c-5p	TRINITY_DN9383_c0_g1_i1	TRINITY_DN9383_c0_g1	NA	NA	GO:0016114|terpenoid biosynthetic process;GO:0080027|response to herbivore;GO:0016021|integral component of membrane;GO:0004497|monooxygenase activity;GO:0005506|iron ion binding;GO:0010333|terpene synthase activity;GO:0016705|oxidoreductase activity, acting on paired donors, with incorporation or reduction of molecular oxygen;GO:0020037|heme binding	ko00905;ko01100;ko01110	1505	1523	1514	0.704735	3	AAGU-GAUCGAAGGAAGCUU&GAGCUUUCUUCGGUCCACUU	0	0	NA	NA	NA	2	76.0485	3	0.34158	Output/short456/cleaveLand_result/t_plot/csi-miR159c-5p_TRINITY_DN9383_c0_g1_i1_1514_TPlot.pdf	0	76.0485	-Inf	down	2.7637e-18	4.06116e-18
csi-miR159c-5p	TRINITY_DN9383_c0_g1_i3	TRINITY_DN9383_c0_g1	NA	NA	GO:0016114|terpenoid biosynthetic process;GO:0080027|response to herbivore;GO:0016021|integral component of membrane;GO:0004497|monooxygenase activity;GO:0005506|iron ion binding;GO:0010333|terpene synthase activity;GO:0016705|oxidoreductase activity, acting on paired donors, with incorporation or reduction of molecular oxygen;GO:0020037|heme binding	NA	1552	1570	1561	0.704735	3	AAGU-GAUCGAAGGAAGCUU&GAGCUUUCUUCGGUCCACUU	0	0	NA	NA	NA	3	114.073	3	0.338655	Output/short456/cleaveLand_result/t_plot/csi-miR159c-5p_TRINITY_DN9383_c0_g1_i3_1561_TPlot.pdf	0	114.073	-Inf	down	1.252e-26	2.10489e-26
csi-miR159c-5p	TRINITY_DN9383_c0_g1_i5	TRINITY_DN9383_c0_g1	NA	NA	GO:0016114|terpenoid biosynthetic process;GO:0080027|response to herbivore;GO:0016021|integral component of membrane;GO:0004497|monooxygenase activity;GO:0005506|iron ion binding;GO:0010333|terpene synthase activity;GO:0016705|oxidoreductase activity, acting on paired donors, with incorporation or reduction of molecular oxygen;GO:0020037|heme binding	ko00905;ko01100;ko01110	1381	1399	1390	0.704735	3	AAGU-GAUCGAAGGAAGCUU&GAGCUUUCUUCGGUCCACUU	0	0	NA	NA	NA	1	38.0243	4	0.233428	Output/short456/cleaveLand_result/t_plot/csi-miR159c-5p_TRINITY_DN9383_c0_g1_i5_1390_TPlot.pdf	0	38.0243	-Inf	down	6.9845e-10	7.47646e-10
csi-miR159c-5p	TRINITY_DN9383_c0_g1_i6	TRINITY_DN9383_c0_g1	NA	NA	GO:0016114|terpenoid biosynthetic process;GO:0080027|response to herbivore;GO:0016021|integral component of membrane;GO:0004497|monooxygenase activity;GO:0005506|iron ion binding;GO:0010333|terpene synthase activity;GO:0016705|oxidoreductase activity, acting on paired donors, with incorporation or reduction of molecular oxygen;GO:0020037|heme binding	ko00905;ko01100;ko01110	1676	1694	1685	0.704735	3	AAGU-GAUCGAAGGAAGCUU&GAGCUUUCUUCGGUCCACUU	0	0	NA	NA	NA	4	152.097	3	0.348216	Output/short456/cleaveLand_result/t_plot/csi-miR159c-5p_TRINITY_DN9383_c0_g1_i6_1685_TPlot.pdf	0	152.097	-Inf	down	5.9991e-35	1.17839e-34
csi-miR160a-5p	TRINITY_DN14627_c0_g1_i14	TRINITY_DN14627_c0_g1	NA	NA	GO:0031365|N-terminal protein amino acid modification;GO:0070084|protein initiator methionine removal;GO:0005737|cytoplasm;GO:0046872|metal ion binding;GO:0070006|metalloaminopeptidase activity	NA	21	40	31	0.719376	6	UUGGCAUACA-GGAGCCAGAG&GCCUGGCUCCCUGUAUGCCAU	0	0	NA	NA	NA	8	304.194	0	0.0172546	Output/short456/cleaveLand_result/t_plot/csi-miR160a-5p_TRINITY_DN14627_c0_g1_i14_31_TPlot.pdf	0	304.194	-Inf	down	3.9261e-68	1.47708e-67
csi-miR160a-5p	TRINITY_DN14627_c0_g1_i18	TRINITY_DN14627_c0_g1	NA	NA	GO:0031365|N-terminal protein amino acid modification;GO:0070084|protein initiator methionine removal;GO:0005737|cytoplasm;GO:0046872|metal ion binding;GO:0070006|metalloaminopeptidase activity	NA	21	40	31	0.719376	6	UUGGCAUACA-GGAGCCAGAG&GCCUGGCUCCCUGUAUGCCAU	0	0	NA	NA	NA	10	380.243	0	0.0178183	Output/short456/cleaveLand_result/t_plot/csi-miR160a-5p_TRINITY_DN14627_c0_g1_i18_31_TPlot.pdf	0	380.243	-Inf	down	1.0627e-84	4.7946e-84
csi-miR160a-5p	TRINITY_DN14627_c0_g1_i4	TRINITY_DN14627_c0_g1	NA	NA	GO:0031365|N-terminal protein amino acid modification;GO:0070084|protein initiator methionine removal;GO:0005737|cytoplasm;GO:0046872|metal ion binding;GO:0070006|metalloaminopeptidase activity	NA	21	40	31	0.719376	6	UUGGCAUACA-GGAGCCAGAG&GCCUGGCUCCCUGUAUGCCAU	0	0	NA	NA	NA	12	456.291	0	0.0176305	Output/short456/cleaveLand_result/t_plot/csi-miR160a-5p_TRINITY_DN14627_c0_g1_i4_31_TPlot.pdf	0	456.291	-Inf	down	0	0
csi-miR160a-5p	TRINITY_DN21659_c0_g1_i15	TRINITY_DN21659_c0_g1	NA	NA	NA	NA	574	595	586	0.681514	7	UGGGCGUGUCAGGGAACCAGGA&GCCUGGCUCCCUG-UAUGCCAU	95	6153.25	2	0.120127	Output/long789/cleaveLand_result/t_plot/csi-miR160a-5p_TRINITY_DN21659_c0_g1_i15_586_TPlot.pdf	67	2547.63	0	0.0343039	Output/short456/cleaveLand_result/t_plot/csi-miR160a-5p_TRINITY_DN21659_c0_g1_i15_586_TPlot.pdf	6153.25	2547.63	1.2722	up	0	0
csi-miR166b-5p	TRINITY_DN279_c1_g1_i1	TRINITY_DN279_c1_g1	NA	NA	GO:0006457|protein folding;GO:0009408|response to heat;GO:0034605|cellular response to heat;GO:0045087|innate immune response;GO:0050821|protein stabilization;GO:0051131|chaperone-mediated protein complex assembly;GO:0071277|cellular response to calcium ion;GO:0005730|nucleolus;GO:0005737|cytoplasm;GO:0005794|Golgi apparatus;GO:0005829|cytosol;GO:0005886|plasma membrane;GO:0009536|plastid;GO:0009…	NA	185	207	199	0.661871	6.5	CCUUGACGAGCCAAAC-ACGUUCG&GGAAUGUUGUUUGGCUCG--AGGG	0	0	NA	NA	NA	2	76.0485	3	0.188055	Output/short456/cleaveLand_result/t_plot/csi-miR166b-5p_TRINITY_DN279_c1_g1_i1_199_TPlot.pdf	0	76.0485	-Inf	down	2.7637e-18	4.06116e-18
csi-miR166b-5p	TRINITY_DN279_c1_g1_i11	TRINITY_DN279_c1_g1	NA	NA	GO:0006457|protein folding;GO:0009408|response to heat;GO:0034605|cellular response to heat;GO:0045087|innate immune response;GO:0050821|protein stabilization;GO:0051131|chaperone-mediated protein complex assembly;GO:0071277|cellular response to calcium ion;GO:0005730|nucleolus;GO:0005737|cytoplasm;GO:0005794|Golgi apparatus;GO:0005829|cytosol;GO:0005886|plasma membrane;GO:0009536|plastid;GO:0009…	NA	185	207	199	0.661871	6.5	CCUUGACGAGCCAAAC-ACGUUCG&GGAAUGUUGUUUGGCUCG--AGGG	1	64.771	4	0.103748	Output/long789/cleaveLand_result/t_plot/csi-miR166b-5p_TRINITY_DN279_c1_g1_i11_199_TPlot.pdf	1	38.0243	4	0.125154	Output/short456/cleaveLand_result/t_plot/csi-miR166b-5p_TRINITY_DN279_c1_g1_i11_199_TPlot.pdf	64.771	38.0243	0.768429	up	0.0083365	0.00847593
csi-miR166b-5p	TRINITY_DN279_c1_g1_i4	TRINITY_DN279_c1_g1	NA	NA	GO:0006457|protein folding;GO:0009408|response to heat;GO:0034605|cellular response to heat;GO:0045087|innate immune response;GO:0050821|protein stabilization;GO:0051131|chaperone-mediated protein complex assembly;GO:0071277|cellular response to calcium ion;GO:0005730|nucleolus;GO:0005737|cytoplasm;GO:0005794|Golgi apparatus;GO:0005829|cytosol;GO:0005886|plasma membrane;GO:0009536|plastid;GO:0009…	NA	185	207	199	0.661871	6.5	CCUUGACGAGCCAAAC-ACGUUCG&GGAAUGUUGUUUGGCUCG--AGGG	0	0	NA	NA	NA	1	38.0243	4	0.123764	Output/short456/cleaveLand_result/t_plot/csi-miR166b-5p_TRINITY_DN279_c1_g1_i4_199_TPlot.pdf	0	38.0243	-Inf	down	6.9845e-10	7.47646e-10
csi-miR166b-5p	TRINITY_DN279_c1_g1_i8	TRINITY_DN279_c1_g1	NA	NA	GO:0006457|protein folding;GO:0009408|response to heat;GO:0034605|cellular response to heat;GO:0045087|innate immune response;GO:0050821|protein stabilization;GO:0051131|chaperone-mediated protein complex assembly;GO:0071277|cellular response to calcium ion;GO:0005730|nucleolus;GO:0005737|cytoplasm;GO:0005794|Golgi apparatus;GO:0005829|cytosol;GO:0005886|plasma membrane;GO:0009536|plastid;GO:0009…	NA	185	207	199	0.661871	6.5	CCUUGACGAGCCAAAC-ACGUUCG&GGAAUGUUGUUUGGCUCG--AGGG	0	0	NA	NA	NA	4	152.097	3	0.199287	Output/short456/cleaveLand_result/t_plot/csi-miR166b-5p_TRINITY_DN279_c1_g1_i8_199_TPlot.pdf	0	152.097	-Inf	down	5.9991e-35	1.17839e-34
csi-miR166b-5p	TRINITY_DN279_c1_g1_i9	TRINITY_DN279_c1_g1	NA	NA	GO:0006457|protein folding;GO:0009408|response to heat;GO:0034605|cellular response to heat;GO:0045087|innate immune response;GO:0050821|protein stabilization;GO:0051131|chaperone-mediated protein complex assembly;GO:0071277|cellular response to calcium ion;GO:0005730|nucleolus;GO:0005737|cytoplasm;GO:0005794|Golgi apparatus;GO:0005829|cytosol;GO:0005886|plasma membrane;GO:0009536|plastid;GO:0009…	NA	185	207	199	0.661871	6.5	CCUUGACGAGCCAAAC-ACGUUCG&GGAAUGUUGUUUGGCUCG--AGGG	0	0	NA	NA	NA	4	152.097	3	0.193691	Output/short456/cleaveLand_result/t_plot/csi-miR166b-5p_TRINITY_DN279_c1_g1_i9_199_TPlot.pdf	0	152.097	-Inf	down	5.9991e-35	1.17839e-34
csi-miR166b-5p	TRINITY_DN60803_c0_g1_i1	TRINITY_DN60803_c0_g1	NA	NA	GO:0006914|autophagy;GO:0015031|protein transport;GO:0051258|protein polymerization;GO:0005737|cytoplasm;GO:0005773|vacuole;GO:0008270|zinc ion binding;GO:0043130|ubiquitin binding	NA	1120	1141	1132	0.77458	7	GCCUCGAGCCAGAUGAUUUUCC&GGAAUGUUGUUUGGCUCGAGGG	0	0	NA	NA	NA	1	38.0243	4	0.00474977	Output/short456/cleaveLand_result/t_plot/csi-miR166b-5p_TRINITY_DN60803_c0_g1_i1_1132_TPlot.pdf	0	38.0243	-Inf	down	6.9845e-10	7.47646e-10
csi-miR393a	TRINITY_DN112_c0_g1_i15	TRINITY_DN112_c0_g1	NA	NA	GO:0006952|defense response;GO:0007049|cell cycle;GO:0009733|response to auxin;GO:0009734|auxin-activated signaling pathway;GO:0009873|ethylene-activated signaling pathway;GO:0010152|pollen maturation;GO:0010311|lateral root formation;GO:0016036|cellular response to phosphate starvation;GO:0031146|SCF-dependent proteasomal ubiquitin-dependent protein catabolic process;GO:0048443|stamen developmen…	ko04075	1731	1752	1743	0.875648	3.5	AGUCAAUGCGAUCCCUAUGGAU&AUCCAAAGGGAUCGCAUUGAUC	8	518.168	2	0.00245136	Output/long789/cleaveLand_result/t_plot/csi-miR393a_TRINITY_DN112_c0_g1_i15_1743_TPlot.pdf	7	266.17	2	0.00272057	Output/short456/cleaveLand_result/t_plot/csi-miR393a_TRINITY_DN112_c0_g1_i15_1743_TPlot.pdf	518.168	266.17	0.961074	up	2.2619e-19	3.59353e-19
csi-miR393a	TRINITY_DN112_c0_g1_i25	TRINITY_DN112_c0_g1	NA	NA	GO:0006952|defense response;GO:0007049|cell cycle;GO:0009733|response to auxin;GO:0009734|auxin-activated signaling pathway;GO:0009873|ethylene-activated signaling pathway;GO:0010152|pollen maturation;GO:0010311|lateral root formation;GO:0016036|cellular response to phosphate starvation;GO:0031146|SCF-dependent proteasomal ubiquitin-dependent protein catabolic process;GO:0048443|stamen developmen…	ko04075	1826	1847	1838	0.875648	3.5	AGUCAAUGCGAUCCCUAUGGAU&AUCCAAAGGGAUCGCAUUGAUC	4	259.084	3	0.00482941	Output/long789/cleaveLand_result/t_plot/csi-miR393a_TRINITY_DN112_c0_g1_i25_1838_TPlot.pdf	1	38.0243	4	0.00316903	Output/short456/cleaveLand_result/t_plot/csi-miR393a_TRINITY_DN112_c0_g1_i25_1838_TPlot.pdf	259.084	38.0243	2.76843	up	1.1756e-37	2.42901e-37
csi-miR393a	TRINITY_DN112_c0_g1_i6	TRINITY_DN112_c0_g1	NA	NA	GO:0006952|defense response;GO:0007049|cell cycle;GO:0009733|response to auxin;GO:0009734|auxin-activated signaling pathway;GO:0009873|ethylene-activated signaling pathway;GO:0010152|pollen maturation;GO:0010311|lateral root formation;GO:0016036|cellular response to phosphate starvation;GO:0031146|SCF-dependent proteasomal ubiquitin-dependent protein catabolic process;GO:0048443|stamen developmen…	ko04075	1917	1938	1929	0.875648	3.5	AGUCAAUGCGAUCCCUAUGGAU&AUCCAAAGGGAUCGCAUUGAUC	4	259.084	3	0.00362425	Output/long789/cleaveLand_result/t_plot/csi-miR393a_TRINITY_DN112_c0_g1_i6_1929_TPlot.pdf	2	76.0485	3	0.00379199	Output/short456/cleaveLand_result/t_plot/csi-miR393a_TRINITY_DN112_c0_g1_i6_1929_TPlot.pdf	259.084	76.0485	1.76843	up	1.5369e-23	2.45521e-23
csi-miR393b-5p	TRINITY_DN112_c0_g1_i15	TRINITY_DN112_c0_g1	NA	NA	GO:0006952|defense response;GO:0007049|cell cycle;GO:0009733|response to auxin;GO:0009734|auxin-activated signaling pathway;GO:0009873|ethylene-activated signaling pathway;GO:0010152|pollen maturation;GO:0010311|lateral root formation;GO:0016036|cellular response to phosphate starvation;GO:0031146|SCF-dependent proteasomal ubiquitin-dependent protein catabolic process;GO:0048443|stamen developmen…	ko04075	1731	1752	1743	0.849351	4.5	AGUCAAUGCGAUCCCUAUGGAU&UUCCAAAGGGAUCGCAUUGAUC	8	518.168	2	0.00245136	Output/long789/cleaveLand_result/t_plot/csi-miR393b-5p_TRINITY_DN112_c0_g1_i15_1743_TPlot.pdf	7	266.17	2	0.00272057	Output/short456/cleaveLand_result/t_plot/csi-miR393b-5p_TRINITY_DN112_c0_g1_i15_1743_TPlot.pdf	518.168	266.17	0.961074	up	2.2619e-19	3.59353e-19
csi-miR393b-5p	TRINITY_DN112_c0_g1_i25	TRINITY_DN112_c0_g1	NA	NA	GO:0006952|defense response;GO:0007049|cell cycle;GO:0009733|response to auxin;GO:0009734|auxin-activated signaling pathway;GO:0009873|ethylene-activated signaling pathway;GO:0010152|pollen maturation;GO:0010311|lateral root formation;GO:0016036|cellular response to phosphate starvation;GO:0031146|SCF-dependent proteasomal ubiquitin-dependent protein catabolic process;GO:0048443|stamen developmen…	ko04075	1826	1847	1838	0.849351	4.5	AGUCAAUGCGAUCCCUAUGGAU&UUCCAAAGGGAUCGCAUUGAUC	4	259.084	3	0.00482941	Output/long789/cleaveLand_result/t_plot/csi-miR393b-5p_TRINITY_DN112_c0_g1_i25_1838_TPlot.pdf	1	38.0243	4	0.00316903	Output/short456/cleaveLand_result/t_plot/csi-miR393b-5p_TRINITY_DN112_c0_g1_i25_1838_TPlot.pdf	259.084	38.0243	2.76843	up	1.1756e-37	2.42901e-37
csi-miR393b-5p	TRINITY_DN112_c0_g1_i6	TRINITY_DN112_c0_g1	NA	NA	GO:0006952|defense response;GO:0007049|cell cycle;GO:0009733|response to auxin;GO:0009734|auxin-activated signaling pathway;GO:0009873|ethylene-activated signaling pathway;GO:0010152|pollen maturation;GO:0010311|lateral root formation;GO:0016036|cellular response to phosphate starvation;GO:0031146|SCF-dependent proteasomal ubiquitin-dependent protein catabolic process;GO:0048443|stamen developmen…	ko04075	1917	1938	1929	0.849351	4.5	AGUCAAUGCGAUCCCUAUGGAU&UUCCAAAGGGAUCGCAUUGAUC	4	259.084	3	0.00362425	Output/long789/cleaveLand_result/t_plot/csi-miR393b-5p_TRINITY_DN112_c0_g1_i6_1929_TPlot.pdf	2	76.0485	3	0.00379199	Output/short456/cleaveLand_result/t_plot/csi-miR393b-5p_TRINITY_DN112_c0_g1_i6_1929_TPlot.pdf	259.084	76.0485	1.76843	up	1.5369e-23	2.45521e-23
csi-miR396e-5p	TRINITY_DN10344_c0_g1_i1	TRINITY_DN10344_c0_g1	NA	NA	GO:0006986|response to unfolded protein;GO:0034620|cellular response to unfolded protein;GO:0042026|protein refolding;GO:0051085|chaperone cofactor-dependent protein refolding;GO:0005737|cytoplasm;GO:0005524|ATP binding;GO:0016887|ATPase activity;GO:0031072|heat shock protein binding;GO:0044183|protein folding chaperone;GO:0051082|unfolded protein binding;GO:0051787|misfolded protein binding	ko03040;ko04141;ko04144	2588	2607	2598	0.655882	7	AGAUCGAGACGGCGGUGGAG&UUCCACGGCUUUCUUGAACU	0	0	NA	NA	NA	2	76.0485	3	0.694361	Output/short456/cleaveLand_result/t_plot/csi-miR396e-5p_TRINITY_DN10344_c0_g1_i1_2598_TPlot.pdf	0	76.0485	-Inf	down	2.7637e-18	4.06116e-18
csi-miR396e-5p	TRINITY_DN10344_c0_g1_i10	TRINITY_DN10344_c0_g1	NA	NA	GO:0006986|response to unfolded protein;GO:0034620|cellular response to unfolded protein;GO:0042026|protein refolding;GO:0051085|chaperone cofactor-dependent protein refolding;GO:0005737|cytoplasm;GO:0005524|ATP binding;GO:0016887|ATPase activity;GO:0031072|heat shock protein binding;GO:0044183|protein folding chaperone;GO:0051082|unfolded protein binding;GO:0051787|misfolded protein binding	ko03040;ko04141;ko04144	2589	2608	2599	0.655882	7	AGAUCGAGACGGCGGUGGAG&UUCCACGGCUUUCUUGAACU	1	64.771	4	0.450116	Output/long789/cleaveLand_result/t_plot/csi-miR396e-5p_TRINITY_DN10344_c0_g1_i10_2599_TPlot.pdf	0	0	NA	NA	NA	64.771	0	Inf	up	8.4037e-16	1.0516e-15
csi-miR396e-5p	TRINITY_DN10344_c0_g1_i11	TRINITY_DN10344_c0_g1	NA	NA	GO:0006986|response to unfolded protein;GO:0034620|cellular response to unfolded protein;GO:0042026|protein refolding;GO:0051085|chaperone cofactor-dependent protein refolding;GO:0005737|cytoplasm;GO:0005524|ATP binding;GO:0016887|ATPase activity;GO:0031072|heat shock protein binding;GO:0044183|protein folding chaperone;GO:0051082|unfolded protein binding;GO:0051787|misfolded protein binding	ko03040;ko04141;ko04144	2588	2607	2598	0.655882	7	AGAUCGAGACGGCGGUGGAG&UUCCACGGCUUUCUUGAACU	1	64.771	4	0.449222	Output/long789/cleaveLand_result/t_plot/csi-miR396e-5p_TRINITY_DN10344_c0_g1_i11_2598_TPlot.pdf	1	38.0243	4	0.51715	Output/short456/cleaveLand_result/t_plot/csi-miR396e-5p_TRINITY_DN10344_c0_g1_i11_2598_TPlot.pdf	64.771	38.0243	0.768429	up	0.0083365	0.00847593
csi-miR396e-5p	TRINITY_DN10344_c0_g1_i12	TRINITY_DN10344_c0_g1	NA	NA	GO:0006986|response to unfolded protein;GO:0034620|cellular response to unfolded protein;GO:0042026|protein refolding;GO:0051085|chaperone cofactor-dependent protein refolding;GO:0005737|cytoplasm;GO:0005524|ATP binding;GO:0016887|ATPase activity;GO:0031072|heat shock protein binding;GO:0044183|protein folding chaperone;GO:0051082|unfolded protein binding;GO:0051787|misfolded protein binding	ko03040;ko04141;ko04144	2589	2608	2599	0.655882	7	AGAUCGAGACGGCGGUGGAG&UUCCACGGCUUUCUUGAACU	0	0	NA	NA	NA	1	38.0243	4	0.52776	Output/short456/cleaveLand_result/t_plot/csi-miR396e-5p_TRINITY_DN10344_c0_g1_i12_2599_TPlot.pdf	0	38.0243	-Inf	down	6.9845e-10	7.47646e-10
csi-miR396e-5p	TRINITY_DN10344_c0_g1_i3	TRINITY_DN10344_c0_g1	NA	NA	GO:0006986|response to unfolded protein;GO:0034620|cellular response to unfolded protein;GO:0042026|protein refolding;GO:0051085|chaperone cofactor-dependent protein refolding;GO:0005737|cytoplasm;GO:0005524|ATP binding;GO:0016887|ATPase activity;GO:0031072|heat shock protein binding;GO:0044183|protein folding chaperone;GO:0051082|unfolded protein binding;GO:0051787|misfolded protein binding	ko03040;ko04141;ko04144	2588	2607	2598	0.655882	7	AGAUCGAGACGGCGGUGGAG&UUCCACGGCUUUCUUGAACU	1	64.771	4	0.447788	Output/long789/cleaveLand_result/t_plot/csi-miR396e-5p_TRINITY_DN10344_c0_g1_i3_2598_TPlot.pdf	0	0	NA	NA	NA	64.771	0	Inf	up	8.4037e-16	1.0516e-15
csi-miR396e-5p	TRINITY_DN10344_c0_g1_i4	TRINITY_DN10344_c0_g1	NA	NA	GO:0006986|response to unfolded protein;GO:0034620|cellular response to unfolded protein;GO:0042026|protein refolding;GO:0051085|chaperone cofactor-dependent protein refolding;GO:0005737|cytoplasm;GO:0005524|ATP binding;GO:0016887|ATPase activity;GO:0031072|heat shock protein binding;GO:0044183|protein folding chaperone;GO:0051082|unfolded protein binding;GO:0051787|misfolded protein binding	ko03040;ko04141;ko04144	2589	2608	2599	0.655882	7	AGAUCGAGACGGCGGUGGAG&UUCCACGGCUUUCUUGAACU	1	64.771	4	0.461262	Output/long789/cleaveLand_result/t_plot/csi-miR396e-5p_TRINITY_DN10344_c0_g1_i4_2599_TPlot.pdf	1	38.0243	4	0.530003	Output/short456/cleaveLand_result/t_plot/csi-miR396e-5p_TRINITY_DN10344_c0_g1_i4_2599_TPlot.pdf	64.771	38.0243	0.768429	up	0.0083365	0.00847593
csi-miR396e-5p	TRINITY_DN10344_c0_g1_i5	TRINITY_DN10344_c0_g1	NA	NA	GO:0006986|response to unfolded protein;GO:0034620|cellular response to unfolded protein;GO:0042026|protein refolding;GO:0051085|chaperone cofactor-dependent protein refolding;GO:0005737|cytoplasm;GO:0005524|ATP binding;GO:0016887|ATPase activity;GO:0031072|heat shock protein binding;GO:0044183|protein folding chaperone;GO:0051082|unfolded protein binding;GO:0051787|misfolded protein binding	ko03040;ko04141;ko04144	1990	2009	2000	0.655882	7	AGAUCGAGACGGCGGUGGAG&UUCCACGGCUUUCUUGAACU	3	194.313	3	0.676117	Output/long789/cleaveLand_result/t_plot/csi-miR396e-5p_TRINITY_DN10344_c0_g1_i5_2000_TPlot.pdf	0	0	NA	NA	NA	194.313	0	Inf	up	3.6042e-44	8.09893e-44
csi-miR396e-5p	TRINITY_DN10344_c0_g1_i8	TRINITY_DN10344_c0_g1	NA	NA	GO:0006986|response to unfolded protein;GO:0034620|cellular response to unfolded protein;GO:0042026|protein refolding;GO:0051085|chaperone cofactor-dependent protein refolding;GO:0005737|cytoplasm;GO:0005524|ATP binding;GO:0016887|ATPase activity;GO:0031072|heat shock protein binding;GO:0044183|protein folding chaperone;GO:0051082|unfolded protein binding;GO:0051787|misfolded protein binding	ko03040;ko04141;ko04144	1813	1832	1823	0.655882	7	AGAUCGAGACGGCGGUGGAG&UUCCACGGCUUUCUUGAACU	1	64.771	4	0.452257	Output/long789/cleaveLand_result/t_plot/csi-miR396e-5p_TRINITY_DN10344_c0_g1_i8_1823_TPlot.pdf	0	0	NA	NA	NA	64.771	0	Inf	up	8.4037e-16	1.0516e-15
csi-miR396e-5p	TRINITY_DN10344_c0_g1_i9	TRINITY_DN10344_c0_g1	NA	NA	GO:0006986|response to unfolded protein;GO:0034620|cellular response to unfolded protein;GO:0042026|protein refolding;GO:0051085|chaperone cofactor-dependent protein refolding;GO:0005737|cytoplasm;GO:0005524|ATP binding;GO:0016887|ATPase activity;GO:0031072|heat shock protein binding;GO:0044183|protein folding chaperone;GO:0051082|unfolded protein binding;GO:0051787|misfolded protein binding	ko03040;ko04141;ko04144	1990	2009	2000	0.655882	7	AGAUCGAGACGGCGGUGGAG&UUCCACGGCUUUCUUGAACU	2	129.542	3	0.681944	Output/long789/cleaveLand_result/t_plot/csi-miR396e-5p_TRINITY_DN10344_c0_g1_i9_2000_TPlot.pdf	0	0	NA	NA	NA	129.542	0	Inf	up	5.1393e-30	9.14621e-30
csi-miR396e-5p	TRINITY_DN14121_c0_g1_i1	TRINITY_DN14121_c0_g1	NA	NA	GO:0051028|mRNA transport;GO:0005634|nucleus;GO:0005737|cytoplasm;GO:0003729|mRNA binding	ko03040	725	744	735	0.673529	5.5	GGUGCAAGAAGGCUUUGGAA&UUCCACGGCUUUCUUGAACU	4	259.084	2	0.389624	Output/long789/cleaveLand_result/t_plot/csi-miR396e-5p_TRINITY_DN14121_c0_g1_i1_735_TPlot.pdf	0	0	NA	NA	NA	259.084	0	Inf	up	2.672e-58	8.29613e-58
csi-miR396e-5p	TRINITY_DN14121_c0_g1_i10	TRINITY_DN14121_c0_g1	NA	NA	GO:0051028|mRNA transport;GO:0005634|nucleus;GO:0005737|cytoplasm;GO:0003729|mRNA binding	ko03040	725	744	735	0.673529	5.5	GGUGCAAGAAGGCUUUGGAA&UUCCACGGCUUUCUUGAACU	4	259.084	2	0.386835	Output/long789/cleaveLand_result/t_plot/csi-miR396e-5p_TRINITY_DN14121_c0_g1_i10_735_TPlot.pdf	0	0	NA	NA	NA	259.084	0	Inf	up	2.672e-58	8.29613e-58
csi-miR396e-5p	TRINITY_DN14121_c0_g1_i11	TRINITY_DN14121_c0_g1	NA	NA	GO:0051028|mRNA transport;GO:0005634|nucleus;GO:0005737|cytoplasm;GO:0003729|mRNA binding	ko03040	688	707	698	0.673529	5.5	GGUGCAAGAAGGCUUUGGAA&UUCCACGGCUUUCUUGAACU	7	453.397	0	0.125356	Output/long789/cleaveLand_result/t_plot/csi-miR396e-5p_TRINITY_DN14121_c0_g1_i11_698_TPlot.pdf	0	0	NA	NA	NA	453.397	0	Inf	up	0	0
csi-miR396e-5p	TRINITY_DN14121_c0_g1_i13	TRINITY_DN14121_c0_g1	NA	NA	GO:0005886|plasma membrane;GO:0016021|integral component of membrane;GO:0005524|ATP binding;GO:0106310|protein serine kinase activity;GO:0106311|protein threonine kinase activity	ko03040	882	901	892	0.673529	5.5	GGUGCAAGAAGGCUUUGGAA&UUCCACGGCUUUCUUGAACU	3	194.313	2	0.390693	Output/long789/cleaveLand_result/t_plot/csi-miR396e-5p_TRINITY_DN14121_c0_g1_i13_892_TPlot.pdf	0	0	NA	NA	NA	194.313	0	Inf	up	3.6042e-44	8.09893e-44
csi-miR396e-5p	TRINITY_DN14121_c0_g1_i20	TRINITY_DN14121_c0_g1	NA	NA	GO:0051028|mRNA transport;GO:0005634|nucleus;GO:0005737|cytoplasm;GO:0003729|mRNA binding	ko03040	705	724	715	0.673529	5.5	GGUGCAAGAAGGCUUUGGAA&UUCCACGGCUUUCUUGAACU	1	64.771	4	0.377018	Output/long789/cleaveLand_result/t_plot/csi-miR396e-5p_TRINITY_DN14121_c0_g1_i20_715_TPlot.pdf	0	0	NA	NA	NA	64.771	0	Inf	up	8.4037e-16	1.0516e-15
csi-miR396e-5p	TRINITY_DN14121_c0_g1_i29	TRINITY_DN14121_c0_g1	NA	NA	GO:0051028|mRNA transport;GO:0005634|nucleus;GO:0005737|cytoplasm;GO:0003729|mRNA binding	ko03040	725	744	735	0.673529	5.5	GGUGCAAGAAGGCUUUGGAA&UUCCACGGCUUUCUUGAACU	4	259.084	2	0.391973	Output/long789/cleaveLand_result/t_plot/csi-miR396e-5p_TRINITY_DN14121_c0_g1_i29_735_TPlot.pdf	0	0	NA	NA	NA	259.084	0	Inf	up	2.672e-58	8.29613e-58
csi-miR396e-5p	TRINITY_DN14121_c0_g1_i9	TRINITY_DN14121_c0_g1	NA	NA	GO:0051028|mRNA transport;GO:0005634|nucleus;GO:0005737|cytoplasm;GO:0003729|mRNA binding	ko03040	688	707	698	0.673529	5.5	GGUGCAAGAAGGCUUUGGAA&UUCCACGGCUUUCUUGAACU	2	129.542	3	0.58441	Output/long789/cleaveLand_result/t_plot/csi-miR396e-5p_TRINITY_DN14121_c0_g1_i9_698_TPlot.pdf	0	0	NA	NA	NA	129.542	0	Inf	up	5.1393e-30	9.14621e-30
csi-miR396e-5p	TRINITY_DN178_c0_g1_i16	TRINITY_DN178_c0_g1	NA	NA	GO:0009555|pollen development;GO:0009860|pollen tube growth;GO:0052325|cell wall pectin biosynthetic process;GO:0000139|Golgi membrane;GO:0005794|Golgi apparatus;GO:0016021|integral component of membrane;GO:0090406|pollen tube;GO:0047262|polygalacturonate 4-alpha-galacturonosyltransferase activity	NA	2558	2576	2567	0.697059	5	AGUUCUUG-AAGCUGUGGAA&UUCCACGGCUUUCUUGAACU	1	64.771	4	0.269226	Output/long789/cleaveLand_result/t_plot/csi-miR396e-5p_TRINITY_DN178_c0_g1_i16_2567_TPlot.pdf	0	0	NA	NA	NA	64.771	0	Inf	up	8.4037e-16	1.0516e-15
csi-miR396e-5p	TRINITY_DN178_c0_g1_i5	TRINITY_DN178_c0_g1	NA	NA	GO:0009555|pollen development;GO:0009860|pollen tube growth;GO:0048358|mucilage pectin biosynthetic process;GO:0052325|cell wall pectin biosynthetic process;GO:0000139|Golgi membrane;GO:0005794|Golgi apparatus;GO:0016021|integral component of membrane;GO:0090406|pollen tube;GO:0047262|polygalacturonate 4-alpha-galacturonosyltransferase activity	NA	1283	1301	1292	0.697059	5	AGUUCUUG-AAGCUGUGGAA&UUCCACGGCUUUCUUGAACU	1	64.771	4	0.26875	Output/long789/cleaveLand_result/t_plot/csi-miR396e-5p_TRINITY_DN178_c0_g1_i5_1292_TPlot.pdf	0	0	NA	NA	NA	64.771	0	Inf	up	8.4037e-16	1.0516e-15
csi-miR396e-5p	TRINITY_DN2142_c0_g1_i17	TRINITY_DN2142_c0_g1	NA	NA	GO:0006457|protein folding;GO:0005737|cytoplasm;GO:0005524|ATP binding;GO:0051082|unfolded protein binding	ko04141;ko04626	1506	1525	1516	0.782353	5	AGAGCAAGAAGGCUGUGGAG&UUCCACGGCUUUCUUGAACU	354	22928.9	2	0.0535604	Output/long789/cleaveLand_result/t_plot/csi-miR396e-5p_TRINITY_DN2142_c0_g1_i17_1516_TPlot.pdf	738	28061.9	2	0.0592725	Output/short456/cleaveLand_result/t_plot/csi-miR396e-5p_TRINITY_DN2142_c0_g1_i17_1516_TPlot.pdf	22928.9	28061.9	-0.291443	down	0	0
csi-miR396e-5p	TRINITY_DN2142_c0_g1_i20	TRINITY_DN2142_c0_g1	NA	NA	GO:0006457|protein folding;GO:0034605|cellular response to heat;GO:0050821|protein stabilization;GO:0005737|cytoplasm;GO:0005829|cytosol;GO:0005886|plasma membrane;GO:0009986|cell surface;GO:0032991|protein-containing complex;GO:0048471|perinuclear region of cytoplasm;GO:0005524|ATP binding;GO:0051082|unfolded protein binding	ko04141;ko04626	762	781	772	0.782353	5	AGAGCAAGAAGGCUGUGGAG&UUCCACGGCUUUCUUGAACU	314	20338.1	2	0.0528965	Output/long789/cleaveLand_result/t_plot/csi-miR396e-5p_TRINITY_DN2142_c0_g1_i20_772_TPlot.pdf	700	26617	2	0.05854	Output/short456/cleaveLand_result/t_plot/csi-miR396e-5p_TRINITY_DN2142_c0_g1_i20_772_TPlot.pdf	20338.1	26617	-0.388162	down	0	0
csi-miR396e-5p	TRINITY_DN2142_c0_g1_i7	TRINITY_DN2142_c0_g1	NA	NA	GO:0006457|protein folding;GO:0005737|cytoplasm;GO:0005524|ATP binding;GO:0051082|unfolded protein binding	ko04141;ko04626	2089	2108	2099	0.782353	5	AGAGCAAGAAGGCUGUGGAG&UUCCACGGCUUUCUUGAACU	334	21633.5	2	0.0532285	Output/long789/cleaveLand_result/t_plot/csi-miR396e-5p_TRINITY_DN2142_c0_g1_i7_2099_TPlot.pdf	725	27567.6	2	0.0589063	Output/short456/cleaveLand_result/t_plot/csi-miR396e-5p_TRINITY_DN2142_c0_g1_i7_2099_TPlot.pdf	21633.5	27567.6	-0.349704	down	0	0
csi-miR396e-5p	TRINITY_DN6509_c0_g3_i1	TRINITY_DN6509_c0_g3	NA	NA	GO:0006952|defense response;GO:0006972|hyperosmotic response;GO:0006979|response to oxidative stress;GO:0009409|response to cold;GO:0009414|response to water deprivation;GO:0005576|extracellular region;GO:0005783|endoplasmic reticulum;GO:0005829|cytosol;GO:0004869|cysteine-type endopeptidase inhibitor activity;GO:0050897|cobalt ion binding	NA	392	412	403	0.661765	6	GGUCUGGGUAAAGCCGUGGAU&UUCCACGGCUUU-CUUGAACU	7	453.397	2	0.437506	Output/long789/cleaveLand_result/t_plot/csi-miR396e-5p_TRINITY_DN6509_c0_g3_i1_403_TPlot.pdf	0	0	NA	NA	NA	453.397	0	Inf	up	0	0
csi-miR396e-5p	TRINITY_DN6509_c0_g3_i2	TRINITY_DN6509_c0_g3	NA	NA	GO:0006952|defense response;GO:0006972|hyperosmotic response;GO:0006979|response to oxidative stress;GO:0009409|response to cold;GO:0009414|response to water deprivation;GO:0005576|extracellular region;GO:0005783|endoplasmic reticulum;GO:0005829|cytosol;GO:0004869|cysteine-type endopeptidase inhibitor activity;GO:0050897|cobalt ion binding	NA	392	412	403	0.661765	6	GGUCUGGGUAAAGCCGUGGAU&UUCCACGGCUUU-CUUGAACU	8	518.168	2	0.444562	Output/long789/cleaveLand_result/t_plot/csi-miR396e-5p_TRINITY_DN6509_c0_g3_i2_403_TPlot.pdf	0	0	NA	NA	NA	518.168	0	Inf	up	0	0
csi-miR396e-5p	TRINITY_DN6509_c0_g3_i3	TRINITY_DN6509_c0_g3	NA	NA	GO:0006952|defense response;GO:0006972|hyperosmotic response;GO:0006979|response to oxidative stress;GO:0009409|response to cold;GO:0009414|response to water deprivation;GO:0005576|extracellular region;GO:0005783|endoplasmic reticulum;GO:0005829|cytosol;GO:0004869|cysteine-type endopeptidase inhibitor activity;GO:0050897|cobalt ion binding	NA	392	412	403	0.661765	6	GGUCUGGGUAAAGCCGUGGAU&UUCCACGGCUUU-CUUGAACU	10	647.71	2	0.443002	Output/long789/cleaveLand_result/t_plot/csi-miR396e-5p_TRINITY_DN6509_c0_g3_i3_403_TPlot.pdf	0	0	NA	NA	NA	647.71	0	Inf	up	0	0
csi-miR396e-5p	TRINITY_DN6509_c0_g3_i4	TRINITY_DN6509_c0_g3	NA	NA	GO:0006952|defense response;GO:0006972|hyperosmotic response;GO:0006979|response to oxidative stress;GO:0009409|response to cold;GO:0009414|response to water deprivation;GO:0005576|extracellular region;GO:0005783|endoplasmic reticulum;GO:0005829|cytosol;GO:0004869|cysteine-type endopeptidase inhibitor activity;GO:0050897|cobalt ion binding	NA	392	412	403	0.661765	6	GGUCUGGGUAAAGCCGUGGAU&UUCCACGGCUUU-CUUGAACU	9	582.939	2	0.450759	Output/long789/cleaveLand_result/t_plot/csi-miR396e-5p_TRINITY_DN6509_c0_g3_i4_403_TPlot.pdf	0	0	NA	NA	NA	582.939	0	Inf	up	0	0
csi-miR396e-5p	TRINITY_DN716_c0_g1_i2	TRINITY_DN716_c0_g1	NA	NA	NA	NA	1110	1129	1120	0.682353	6	AGGGCAAGAAAGAAGUGGAA&UUCCACGGCUUUCUUGAACU	0	0	NA	NA	NA	32	1216.78	2	0.382094	Output/short456/cleaveLand_result/t_plot/csi-miR396e-5p_TRINITY_DN716_c0_g1_i2_1120_TPlot.pdf	0	1216.78	-Inf	down	0	0
csi-miR396e-5p	TRINITY_DN75372_c0_g1_i1	TRINITY_DN75372_c0_g1	NA	NA	GO:0009658|chloroplast organization;GO:0010274|hydrotropism;GO:0005737|cytoplasm;GO:0005783|endoplasmic reticulum;GO:0005789|endoplasmic reticulum membrane;GO:0016020|membrane;GO:0032541|cortical endoplasmic reticulum	NA	700	718	709	0.652941	5	GGUUCUC-AAAGCUGUGGAG&UUCCACGGCUUUCUUGAACU	3	194.313	3	0.686719	Output/long789/cleaveLand_result/t_plot/csi-miR396e-5p_TRINITY_DN75372_c0_g1_i1_709_TPlot.pdf	5	190.121	3	0.703135	Output/short456/cleaveLand_result/t_plot/csi-miR396e-5p_TRINITY_DN75372_c0_g1_i1_709_TPlot.pdf	194.313	190.121	0.031463	up	0.83069	0.83069
csi-miR396e-5p	TRINITY_DN8746_c0_g1_i1	TRINITY_DN8746_c0_g1	NA	NA	GO:0006351|transcription, DNA-templated;GO:0006355|regulation of transcription, DNA-templated;GO:0032502|developmental process;GO:0005634|nucleus;GO:0005524|ATP binding	NA	459	479	469	0.897059	3	CGUUCAAGAAAGCCUGUGGAA&UUCCAC-GGCUUUCUUGAACU	20	1295.42	0	0.00209654	Output/long789/cleaveLand_result/t_plot/csi-miR396e-5p_TRINITY_DN8746_c0_g1_i1_469_TPlot.pdf	15	570.364	0	0.00210171	Output/short456/cleaveLand_result/t_plot/csi-miR396e-5p_TRINITY_DN8746_c0_g1_i1_469_TPlot.pdf	1295.42	570.364	1.18347	up	2.7182e-63	9.66006e-63
csi-miR396e-5p	TRINITY_DN8746_c0_g1_i13	TRINITY_DN8746_c0_g1	NA	NA	GO:0006351|transcription, DNA-templated;GO:0006355|regulation of transcription, DNA-templated;GO:0032502|developmental process;GO:0005634|nucleus;GO:0005524|ATP binding	NA	459	479	469	0.897059	3	CGUUCAAGAAAGCCUGUGGAA&UUCCAC-GGCUUUCUUGAACU	26	1684.05	0	0.00200134	Output/long789/cleaveLand_result/t_plot/csi-miR396e-5p_TRINITY_DN8746_c0_g1_i13_469_TPlot.pdf	30	1140.73	3	0.0132092	Output/short456/cleaveLand_result/t_plot/csi-miR396e-5p_TRINITY_DN8746_c0_g1_i13_469_TPlot.pdf	1684.05	1140.73	0.561978	up	1.4572e-24	2.33759e-24
csi-miR396e-5p	TRINITY_DN8746_c0_g1_i14	TRINITY_DN8746_c0_g1	NA	NA	GO:0006351|transcription, DNA-templated;GO:0006355|regulation of transcription, DNA-templated;GO:0032502|developmental process;GO:0005634|nucleus;GO:0005524|ATP binding	NA	459	479	469	0.897059	3	CGUUCAAGAAAGCCUGUGGAA&UUCCAC-GGCUUUCUUGAACU	12	777.252	0	0.00228692	Output/long789/cleaveLand_result/t_plot/csi-miR396e-5p_TRINITY_DN8746_c0_g1_i14_469_TPlot.pdf	25	950.606	3	0.0150819	Output/short456/cleaveLand_result/t_plot/csi-miR396e-5p_TRINITY_DN8746_c0_g1_i14_469_TPlot.pdf	777.252	950.606	-0.290465	down	3.0164e-05	3.1701e-05
csi-miR396e-5p	TRINITY_DN8746_c0_g1_i16	TRINITY_DN8746_c0_g1	NA	NA	GO:0006351|transcription, DNA-templated;GO:0006355|regulation of transcription, DNA-templated;GO:0032502|developmental process;GO:0005634|nucleus;GO:0005524|ATP binding	NA	532	552	542	0.897059	3	CGUUCAAGAAAGCCUGUGGAA&UUCCAC-GGCUUUCUUGAACU	9	582.939	3	0.0120298	Output/long789/cleaveLand_result/t_plot/csi-miR396e-5p_TRINITY_DN8746_c0_g1_i16_542_TPlot.pdf	0	0	NA	NA	NA	582.939	0	Inf	up	0	0
csi-miR396e-5p	TRINITY_DN8746_c0_g1_i18	TRINITY_DN8746_c0_g1	NA	NA	GO:0006351|transcription, DNA-templated;GO:0006355|regulation of transcription, DNA-templated;GO:0032502|developmental process;GO:0005634|nucleus;GO:0005524|ATP binding	NA	1630	1650	1640	0.897059	3	CGUUCAAGAAAGCCUGUGGAA&UUCCAC-GGCUUUCUUGAACU	9	582.939	3	0.0150146	Output/long789/cleaveLand_result/t_plot/csi-miR396e-5p_TRINITY_DN8746_c0_g1_i18_1640_TPlot.pdf	0	0	NA	NA	NA	582.939	0	Inf	up	0	0
csi-miR396e-5p	TRINITY_DN8746_c0_g1_i19	TRINITY_DN8746_c0_g1	NA	NA	GO:0006351|transcription, DNA-templated;GO:0006355|regulation of transcription, DNA-templated;GO:0032502|developmental process;GO:0005634|nucleus;GO:0005524|ATP binding	NA	615	635	625	0.897059	3	CGUUCAAGAAAGCCUGUGGAA&UUCCAC-GGCUUUCUUGAACU	13	842.023	0	0.00152519	Output/long789/cleaveLand_result/t_plot/csi-miR396e-5p_TRINITY_DN8746_c0_g1_i19_625_TPlot.pdf	0	0	NA	NA	NA	842.023	0	Inf	up	0	0
csi-miR396e-5p	TRINITY_DN8746_c0_g1_i3	TRINITY_DN8746_c0_g1	NA	NA	GO:0006351|transcription, DNA-templated;GO:0006355|regulation of transcription, DNA-templated;GO:0032502|developmental process;GO:0005634|nucleus;GO:0005524|ATP binding	NA	459	479	469	0.897059	3	CGUUCAAGAAAGCCUGUGGAA&UUCCAC-GGCUUUCUUGAACU	17	1101.11	0	0.00181091	Output/long789/cleaveLand_result/t_plot/csi-miR396e-5p_TRINITY_DN8746_c0_g1_i3_469_TPlot.pdf	21	798.509	3	0.0119587	Output/short456/cleaveLand_result/t_plot/csi-miR396e-5p_TRINITY_DN8746_c0_g1_i3_469_TPlot.pdf	1101.11	798.509	0.463574	up	3.7558e-12	4.5759e-12
csi-miR396e-5p	TRINITY_DN8746_c0_g1_i7	TRINITY_DN8746_c0_g1	NA	NA	GO:0006351|transcription, DNA-templated;GO:0006355|regulation of transcription, DNA-templated;GO:0032502|developmental process;GO:0005634|nucleus;GO:0005524|ATP binding	NA	1713	1733	1723	0.897059	3	CGUUCAAGAAAGCCUGUGGAA&UUCCAC-GGCUUUCUUGAACU	9	582.939	3	0.0102346	Output/long789/cleaveLand_result/t_plot/csi-miR396e-5p_TRINITY_DN8746_c0_g1_i7_1723_TPlot.pdf	0	0	NA	NA	NA	582.939	0	Inf	up	0	0
csi-miR399b-5p	TRINITY_DN1017_c1_g1_i1	TRINITY_DN1017_c1_g1	NA	NA	GO:0000103|sulfate assimilation;GO:0001887|selenium compound metabolic process;GO:0046686|response to cadmium ion;GO:0070814|hydrogen sulfide biosynthetic process;GO:0005886|plasma membrane;GO:0009507|chloroplast;GO:0009570|chloroplast stroma;GO:0004020|adenylylsulfate kinase activity;GO:0004781|sulfate adenylyltransferase (ATP) activity;GO:0005524|ATP binding	ko00230;ko00261;ko00450;ko00920;ko01100	330	351	342	0.672209	6.5	AUGUUAAGAGGAGAGAAGCCAU&AGGGCUUCUCUCCUUU-GGCAG	2	129.542	3	0.406806	Output/long789/cleaveLand_result/t_plot/csi-miR399b-5p_TRINITY_DN1017_c1_g1_i1_342_TPlot.pdf	31	1178.75	2	0.28528	Output/short456/cleaveLand_result/t_plot/csi-miR399b-5p_TRINITY_DN1017_c1_g1_i1_342_TPlot.pdf	129.542	1178.75	-3.18577	down	0	0
csi-miR399b-5p	TRINITY_DN1017_c1_g1_i2	TRINITY_DN1017_c1_g1	NA	NA	GO:0000103|sulfate assimilation;GO:0001887|selenium compound metabolic process;GO:0046686|response to cadmium ion;GO:0070814|hydrogen sulfide biosynthetic process;GO:0005886|plasma membrane;GO:0009507|chloroplast;GO:0009570|chloroplast stroma;GO:0004020|adenylylsulfate kinase activity;GO:0004781|sulfate adenylyltransferase (ATP) activity;GO:0005524|ATP binding	ko00230;ko00261;ko00450;ko00920;ko01100	330	351	342	0.672209	6.5	AUGUUAAGAGGAGAGAAGCCAU&AGGGCUUCUCUCCUUU-GGCAG	2	129.542	3	0.406447	Output/long789/cleaveLand_result/t_plot/csi-miR399b-5p_TRINITY_DN1017_c1_g1_i2_342_TPlot.pdf	35	1330.85	2	0.285002	Output/short456/cleaveLand_result/t_plot/csi-miR399b-5p_TRINITY_DN1017_c1_g1_i2_342_TPlot.pdf	129.542	1330.85	-3.36085	down	0	0
csi-miR399b-5p	TRINITY_DN4916_c0_g1_i3	TRINITY_DN4916_c0_g1	NA	NA	GO:0001732|formation of cytoplasmic translation initiation complex;GO:0002188|translation reinitiation;GO:0006413|translational initiation;GO:0005829|cytosol;GO:0005852|eukaryotic translation initiation factor 3 complex;GO:0005886|plasma membrane;GO:0016282|eukaryotic 43S preinitiation complex;GO:0033290|eukaryotic 48S preinitiation complex;GO:0043614|multi-eIF complex;GO:0071540|eukaryotic trans…	ko03013	2606	2626	2618	0.660333	7	GUGCGAGGAGGAG-GAAGCCCG&AGGGCUUCUCUCCUUU-GGCAG	0	0	NA	NA	NA	1	38.0243	4	0.343062	Output/short456/cleaveLand_result/t_plot/csi-miR399b-5p_TRINITY_DN4916_c0_g1_i3_2618_TPlot.pdf	0	38.0243	-Inf	down	6.9845e-10	7.47646e-10
csi-miR399b-5p	TRINITY_DN4916_c0_g1_i5	TRINITY_DN4916_c0_g1	NA	NA	GO:0001732|formation of cytoplasmic translation initiation complex;GO:0002188|translation reinitiation;GO:0016282|eukaryotic 43S preinitiation complex;GO:0033290|eukaryotic 48S preinitiation complex;GO:0043614|multi-eIF complex;GO:0071540|eukaryotic translation initiation factor 3 complex, eIF3e;GO:0071541|eukaryotic translation initiation factor 3 complex, eIF3m;GO:0003729|mRNA binding;GO:000374…	ko03013	78	98	90	0.660333	7	GUGCGAGGAGGAG-GAAGCCCG&AGGGCUUCUCUCCUUU-GGCAG	0	0	NA	NA	NA	2	76.0485	3	0.489224	Output/short456/cleaveLand_result/t_plot/csi-miR399b-5p_TRINITY_DN4916_c0_g1_i5_90_TPlot.pdf	0	76.0485	-Inf	down	2.7637e-18	4.06116e-18
csi-miR399b-5p	TRINITY_DN4916_c0_g1_i6	TRINITY_DN4916_c0_g1	NA	NA	GO:0001732|formation of cytoplasmic translation initiation complex;GO:0002188|translation reinitiation;GO:0006413|translational initiation;GO:0005829|cytosol;GO:0005852|eukaryotic translation initiation factor 3 complex;GO:0005886|plasma membrane;GO:0016282|eukaryotic 43S preinitiation complex;GO:0033290|eukaryotic 48S preinitiation complex;GO:0043614|multi-eIF complex;GO:0071540|eukaryotic trans…	ko03013	2606	2626	2618	0.660333	7	GUGCGAGGAGGAG-GAAGCCCG&AGGGCUUCUCUCCUUU-GGCAG	0	0	NA	NA	NA	2	76.0485	3	0.482059	Output/short456/cleaveLand_result/t_plot/csi-miR399b-5p_TRINITY_DN4916_c0_g1_i6_2618_TPlot.pdf	0	76.0485	-Inf	down	2.7637e-18	4.06116e-18
csi-miR399b-5p	TRINITY_DN73173_c0_g1_i1	TRINITY_DN73173_c0_g1	NA	NA	GO:0005886|plasma membrane;GO:0016021|integral component of membrane;GO:0005524|ATP binding;GO:0106310|protein serine kinase activity;GO:0106311|protein threonine kinase activity	ko00010;ko01100;ko01110	44	67	57	0.710214	7	CUGCUCUGAAGGAGAGCAAGCCUG&AGGGCUU-CUCUCCUUU--GGCAG	0	0	NA	NA	NA	3	114.073	3	0.203333	Output/short456/cleaveLand_result/t_plot/csi-miR399b-5p_TRINITY_DN73173_c0_g1_i1_57_TPlot.pdf	0	114.073	-Inf	down	1.252e-26	2.10489e-26
csi-miR399b-5p	TRINITY_DN73173_c0_g1_i2	TRINITY_DN73173_c0_g1	NA	NA	GO:0005886|plasma membrane;GO:0016021|integral component of membrane;GO:0005524|ATP binding;GO:0106310|protein serine kinase activity;GO:0106311|protein threonine kinase activity	ko00010;ko01100;ko01110	44	67	57	0.710214	7	CUGCUCUGAAGGAGAGCAAGCCUG&AGGGCUU-CUCUCCUUU--GGCAG	0	0	NA	NA	NA	2	76.0485	3	0.205851	Output/short456/cleaveLand_result/t_plot/csi-miR399b-5p_TRINITY_DN73173_c0_g1_i2_57_TPlot.pdf	0	76.0485	-Inf	down	2.7637e-18	4.06116e-18
csi-miR399b-5p	TRINITY_DN73173_c0_g1_i4	TRINITY_DN73173_c0_g1	NA	NA	GO:0005886|plasma membrane;GO:0016021|integral component of membrane;GO:0005524|ATP binding;GO:0106310|protein serine kinase activity;GO:0106311|protein threonine kinase activity	ko00010;ko01100;ko01110	44	67	57	0.710214	7	CUGCUCUGAAGGAGAGCAAGCCUG&AGGGCUU-CUCUCCUUU--GGCAG	0	0	NA	NA	NA	2	76.0485	3	0.202324	Output/short456/cleaveLand_result/t_plot/csi-miR399b-5p_TRINITY_DN73173_c0_g1_i4_57_TPlot.pdf	0	76.0485	-Inf	down	2.7637e-18	4.06116e-18
csi-miR399b-5p	TRINITY_DN73173_c0_g1_i5	TRINITY_DN73173_c0_g1	NA	NA	GO:0005886|plasma membrane;GO:0016021|integral component of membrane;GO:0005524|ATP binding;GO:0106310|protein serine kinase activity;GO:0106311|protein threonine kinase activity	ko00010;ko01100;ko01110	44	67	57	0.710214	7	CUGCUCUGAAGGAGAGCAAGCCUG&AGGGCUU-CUCUCCUUU--GGCAG	0	0	NA	NA	NA	2	76.0485	3	0.202828	Output/short456/cleaveLand_result/t_plot/csi-miR399b-5p_TRINITY_DN73173_c0_g1_i5_57_TPlot.pdf	0	76.0485	-Inf	down	2.7637e-18	4.06116e-18
csi-miR399c-5p	TRINITY_DN12975_c0_g1_i1	TRINITY_DN12975_c0_g1	NA	NA	GO:0005886|plasma membrane;GO:0016021|integral component of membrane;GO:0005524|ATP binding;GO:0106310|protein serine kinase activity;GO:0106311|protein threonine kinase activity	NA	1504	1522	1515	0.666667	7	GCCGCCAAAGG-GG-CUGUAC&GUGCAGUCCUCCUUUGGCGUG	9	582.939	3	0.315743	Output/long789/cleaveLand_result/t_plot/csi-miR399c-5p_TRINITY_DN12975_c0_g1_i1_1515_TPlot.pdf	1	38.0243	4	0.220238	Output/short456/cleaveLand_result/t_plot/csi-miR399c-5p_TRINITY_DN12975_c0_g1_i1_1515_TPlot.pdf	582.939	38.0243	3.93835	up	0	0
csi-miR477b-5p	TRINITY_DN1270_c2_g1_i1	TRINITY_DN1270_c2_g1	NA	NA	NA	NA	55	73	65	0.657277	7	CGAGGAGGUC--GAGGGAGAG&CUCUCCCUCAAGGGCUUCUCU	11	712.481	3	0.40031	Output/long789/cleaveLand_result/t_plot/csi-miR477b-5p_TRINITY_DN1270_c2_g1_i1_65_TPlot.pdf	13	494.315	3	0.414362	Output/short456/cleaveLand_result/t_plot/csi-miR477b-5p_TRINITY_DN1270_c2_g1_i1_65_TPlot.pdf	712.481	494.315	0.527421	up	3.3415e-10	4.04977e-10
csi-miR530a-5p	TRINITY_DN2485_c0_g1_i2	TRINITY_DN2485_c0_g1	NA	NA	GO:0006270|DNA replication initiation;GO:0007049|cell cycle;GO:0005634|nucleus;GO:0042555|MCM complex;GO:0003677|DNA binding;GO:0003678|DNA helicase activity;GO:0005524|ATP binding;GO:0046872|metal ion binding	ko03030	828	848	839	0.78117	7	GAUGGUGCAGGUGCAGACGCU&UGCAUUUGCACCUGCACCUUG	2	129.542	3	0.0649641	Output/long789/cleaveLand_result/t_plot/csi-miR530a-5p_TRINITY_DN2485_c0_g1_i2_839_TPlot.pdf	1	38.0243	4	0.0430844	Output/short456/cleaveLand_result/t_plot/csi-miR530a-5p_TRINITY_DN2485_c0_g1_i2_839_TPlot.pdf	129.542	38.0243	1.76843	up	1.5473e-12	1.90526e-12
csi-miR530a-5p	TRINITY_DN2485_c0_g1_i28	TRINITY_DN2485_c0_g1	NA	NA	GO:0006270|DNA replication initiation;GO:0007049|cell cycle;GO:0005634|nucleus;GO:0042555|MCM complex;GO:0003677|DNA binding;GO:0003678|DNA helicase activity;GO:0005524|ATP binding;GO:0046872|metal ion binding	ko03030	828	848	839	0.78117	7	GAUGGUGCAGGUGCAGACGCU&UGCAUUUGCACCUGCACCUUG	6	388.626	2	0.0371595	Output/long789/cleaveLand_result/t_plot/csi-miR530a-5p_TRINITY_DN2485_c0_g1_i28_839_TPlot.pdf	1	38.0243	4	0.0419447	Output/short456/cleaveLand_result/t_plot/csi-miR530a-5p_TRINITY_DN2485_c0_g1_i28_839_TPlot.pdf	388.626	38.0243	3.35339	up	1.2452e-64	4.56573e-64
csi-miR530a-5p	TRINITY_DN2485_c0_g1_i34	TRINITY_DN2485_c0_g1	NA	NA	GO:0006270|DNA replication initiation;GO:0007049|cell cycle;GO:0005634|nucleus;GO:0042555|MCM complex;GO:0003677|DNA binding;GO:0003678|DNA helicase activity;GO:0005524|ATP binding;GO:0046872|metal ion binding	ko03030	804	824	815	0.78117	7	GAUGGUGCAGGUGCAGACGCU&UGCAUUUGCACCUGCACCUUG	6	388.626	2	0.0405295	Output/long789/cleaveLand_result/t_plot/csi-miR530a-5p_TRINITY_DN2485_c0_g1_i34_815_TPlot.pdf	0	0	NA	NA	NA	388.626	0	Inf	up	1.5868e-86	7.5422e-86
csi-miR530a-5p	TRINITY_DN2485_c0_g1_i35	TRINITY_DN2485_c0_g1	NA	NA	GO:0000727|double-strand break repair via break-induced replication;GO:0006267|pre-replicative complex assembly involved in nuclear cell cycle DNA replication;GO:0006268|DNA unwinding involved in DNA replication;GO:0006270|DNA replication initiation;GO:1902969|mitotic DNA replication;GO:0000347|THO complex;GO:0005634|nucleus;GO:0042555|MCM complex;GO:0003678|DNA helicase activity;GO:0003688|DNA r…	ko03030	2310	2330	2321	0.78117	7	GAUGGUGCAGGUGCAGACGCU&UGCAUUUGCACCUGCACCUUG	4	259.084	3	0.0683529	Output/long789/cleaveLand_result/t_plot/csi-miR530a-5p_TRINITY_DN2485_c0_g1_i35_2321_TPlot.pdf	0	0	NA	NA	NA	259.084	0	Inf	up	2.672e-58	8.29613e-58
csi-miR530a-5p	TRINITY_DN2485_c0_g1_i4	TRINITY_DN2485_c0_g1	NA	NA	GO:0006270|DNA replication initiation;GO:0007049|cell cycle;GO:0005634|nucleus;GO:0042555|MCM complex;GO:0003677|DNA binding;GO:0003678|DNA helicase activity;GO:0005524|ATP binding;GO:0046872|metal ion binding	ko03030	804	824	815	0.78117	7	GAUGGUGCAGGUGCAGACGCU&UGCAUUUGCACCUGCACCUUG	3	194.313	3	0.067789	Output/long789/cleaveLand_result/t_plot/csi-miR530a-5p_TRINITY_DN2485_c0_g1_i4_815_TPlot.pdf	3	114.073	3	0.0708185	Output/short456/cleaveLand_result/t_plot/csi-miR530a-5p_TRINITY_DN2485_c0_g1_i4_815_TPlot.pdf	194.313	114.073	0.768429	up	4.8864e-06	5.18255e-06
csi-miR530a-5p	TRINITY_DN2485_c0_g1_i7	TRINITY_DN2485_c0_g1	NA	NA	GO:0006270|DNA replication initiation;GO:0007049|cell cycle;GO:0005634|nucleus;GO:0042555|MCM complex;GO:0003677|DNA binding;GO:0003678|DNA helicase activity;GO:0005524|ATP binding;GO:0046872|metal ion binding	ko03030	631	651	642	0.78117	7	GAUGGUGCAGGUGCAGACGCU&UGCAUUUGCACCUGCACCUUG	3	194.313	3	0.0626981	Output/long789/cleaveLand_result/t_plot/csi-miR530a-5p_TRINITY_DN2485_c0_g1_i7_642_TPlot.pdf	0	0	NA	NA	NA	194.313	0	Inf	up	3.6042e-44	8.09893e-44
far-miR156b	TRINITY_DN48253_c3_g1_i6	TRINITY_DN48253_c3_g1	NA	NA	NA	NA	81	102	92	0.731771	7	GUGCUCUCUCUCUCUCUCUCUC&UUGACAGA-AGAGAGAGAGCAC	1	64.771	4	0.0635464	Output/long789/cleaveLand_result/t_plot/far-miR156b_TRINITY_DN48253_c3_g1_i6_92_TPlot.pdf	0	0	NA	NA	NA	64.771	0	Inf	up	8.4037e-16	1.0516e-15
far-miR156b	TRINITY_DN5374_c0_g1_i9	TRINITY_DN5374_c0_g1	NA	NA	GO:0006952|defense response;GO:0010200|response to chitin;GO:0005634|nucleus;GO:0000976|transcription regulatory region sequence-specific DNA binding;GO:0003700|DNA-binding transcription factor activity;GO:0043565|sequence-specific DNA binding	NA	247	266	257	0.666667	5	AGGCUCU-UCUCUUCUGUUAC&UUGACAGAAGAGAGAGAGCAC	0	0	NA	NA	NA	1	38.0243	4	0.285415	Output/short456/cleaveLand_result/t_plot/far-miR156b_TRINITY_DN5374_c0_g1_i9_257_TPlot.pdf	0	38.0243	-Inf	down	6.9845e-10	7.47646e-10
fve-miR11300	TRINITY_DN3361_c0_g1_i3	TRINITY_DN3361_c0_g1	NA	NA	GO:0006587|serotonin biosynthetic process from tryptophan;GO:0006952|defense response;GO:0005789|endoplasmic reticulum membrane;GO:0016021|integral component of membrane;GO:0004497|monooxygenase activity;GO:0005506|iron ion binding;GO:0016705|oxidoreductase activity, acting on paired donors, with incorporation or reduction of molecular oxygen;GO:0020037|heme binding	NA	1554	1575	1566	0.811268	5.5	GGGAUGAGAGCCGGUGAUGUUG&CAACAUCACUG-UUCUCUUCCU	1	64.771	4	0.0253502	Output/long789/cleaveLand_result/t_plot/fve-miR11300_TRINITY_DN3361_c0_g1_i3_1566_TPlot.pdf	0	0	NA	NA	NA	64.771	0	Inf	up	8.4037e-16	1.0516e-15
fve-miR11300	TRINITY_DN3361_c0_g1_i5	TRINITY_DN3361_c0_g1	NA	NA	GO:0006587|serotonin biosynthetic process from tryptophan;GO:0006952|defense response;GO:0005789|endoplasmic reticulum membrane;GO:0016021|integral component of membrane;GO:0004497|monooxygenase activity;GO:0005506|iron ion binding;GO:0016705|oxidoreductase activity, acting on paired donors, with incorporation or reduction of molecular oxygen;GO:0020037|heme binding	NA	2243	2264	2255	0.811268	5.5	GGGAUGAGAGCCGGUGAUGUUG&CAACAUCACUG-UUCUCUUCCU	3	194.313	2	0.0269781	Output/long789/cleaveLand_result/t_plot/fve-miR11300_TRINITY_DN3361_c0_g1_i5_2255_TPlot.pdf	0	0	NA	NA	NA	194.313	0	Inf	up	3.6042e-44	8.09893e-44
fve-miR11300	TRINITY_DN4290_c0_g1_i1	TRINITY_DN4290_c0_g1	NA	NA	GO:0000302|response to reactive oxygen species;GO:0006457|protein folding;GO:0009408|response to heat;GO:0009651|response to salt stress;GO:0042542|response to hydrogen peroxide;GO:0051259|protein complex oligomerization;GO:0005788|endoplasmic reticulum lumen;GO:0043621|protein self-association;GO:0051082|unfolded protein binding	ko04141	411	431	422	0.729577	6.5	AGGAGGAGAAAGGUGGUGGUG&CAACAUCACUGUUCUCUUCCU	23	1489.73	2	0.134508	Output/long789/cleaveLand_result/t_plot/fve-miR11300_TRINITY_DN4290_c0_g1_i1_422_TPlot.pdf	10	380.243	3	0.229625	Output/short456/cleaveLand_result/t_plot/fve-miR11300_TRINITY_DN4290_c0_g1_i1_422_TPlot.pdf	1489.73	380.243	1.97006	up	0	0
fve-miR11300	TRINITY_DN4290_c0_g1_i2	TRINITY_DN4290_c0_g1	NA	NA	GO:0000302|response to reactive oxygen species;GO:0006457|protein folding;GO:0009408|response to heat;GO:0009651|response to salt stress;GO:0042542|response to hydrogen peroxide;GO:0051259|protein complex oligomerization;GO:0005788|endoplasmic reticulum lumen;GO:0043621|protein self-association;GO:0051082|unfolded protein binding	ko04141	411	431	422	0.729577	6.5	AGGAGGAGAAAGGUGGUGGUG&CAACAUCACUGUUCUCUUCCU	21	1360.19	2	0.133901	Output/long789/cleaveLand_result/t_plot/fve-miR11300_TRINITY_DN4290_c0_g1_i2_422_TPlot.pdf	14	532.34	2	0.147486	Output/short456/cleaveLand_result/t_plot/fve-miR11300_TRINITY_DN4290_c0_g1_i2_422_TPlot.pdf	1360.19	532.34	1.35339	up	8.1561e-81	3.63718e-80
fve-miR159a-5p	TRINITY_DN230_c7_g1_i1	TRINITY_DN230_c7_g1	NA	NA	GO:0000271|polysaccharide biosynthetic process;GO:0009969|xyloglucan biosynthetic process;GO:0010411|xyloglucan metabolic process;GO:0000138|Golgi trans cisterna;GO:0000139|Golgi membrane;GO:0005768|endosome;GO:0005794|Golgi apparatus;GO:0005802|trans-Golgi network;GO:0005829|cytosol;GO:0016021|integral component of membrane;GO:0016758|transferase activity, transferring hexosyl groups;GO:0033843|…	NA	293	313	304	0.682667	7	GAGCAGGACUUCAAGGAGAUC&GAGCUCCUUGAAGUCCAAUAG	2	129.542	3	0.142475	Output/long789/cleaveLand_result/t_plot/fve-miR159a-5p_TRINITY_DN230_c7_g1_i1_304_TPlot.pdf	0	0	NA	NA	NA	129.542	0	Inf	up	5.1393e-30	9.14621e-30
fve-miR159a-5p	TRINITY_DN3066_c0_g1_i5	TRINITY_DN3066_c0_g1	NA	NA	NA	NA	28	47	39	0.658667	7	UUCUUGGACUUU-AGGAGCUG&GAGCUCCUUGAAGUCCAAUAG	2	129.542	3	0.217359	Output/long789/cleaveLand_result/t_plot/fve-miR159a-5p_TRINITY_DN3066_c0_g1_i5_39_TPlot.pdf	0	0	NA	NA	NA	129.542	0	Inf	up	5.1393e-30	9.14621e-30
fve-miR159a-5p	TRINITY_DN3066_c0_g2_i1	TRINITY_DN3066_c0_g2	NA	NA	GO:0009901|anther dehiscence;GO:0010584|pollen exine formation;GO:0016021|integral component of membrane;GO:0005524|ATP binding;GO:0102485|dATP phosphohydrolase activity;GO:0102486|dCTP phosphohydrolase activity;GO:0102487|dUTP phosphohydrolase activity;GO:0102488|dTTP phosphohydrolase activity;GO:0102489|GTP phosphohydrolase activity;GO:0102490|8-oxo-dGTP phosphohydrolase activity;GO:0102491|dGT…	NA	1883	1902	1894	0.658667	7	UUCUUGGACUUU-AGGAGCUG&GAGCUCCUUGAAGUCCAAUAG	2	129.542	3	0.213085	Output/long789/cleaveLand_result/t_plot/fve-miR159a-5p_TRINITY_DN3066_c0_g2_i1_1894_TPlot.pdf	0	0	NA	NA	NA	129.542	0	Inf	up	5.1393e-30	9.14621e-30
fve-miR159a-5p	TRINITY_DN3066_c0_g2_i2	TRINITY_DN3066_c0_g2	NA	NA	GO:0009901|anther dehiscence;GO:0010584|pollen exine formation;GO:0016021|integral component of membrane;GO:0005524|ATP binding;GO:0102485|dATP phosphohydrolase activity;GO:0102486|dCTP phosphohydrolase activity;GO:0102487|dUTP phosphohydrolase activity;GO:0102488|dTTP phosphohydrolase activity;GO:0102489|GTP phosphohydrolase activity;GO:0102490|8-oxo-dGTP phosphohydrolase activity;GO:0102491|dGT…	NA	1808	1827	1819	0.658667	7	UUCUUGGACUUU-AGGAGCUG&GAGCUCCUUGAAGUCCAAUAG	1	64.771	4	0.127887	Output/long789/cleaveLand_result/t_plot/fve-miR159a-5p_TRINITY_DN3066_c0_g2_i2_1819_TPlot.pdf	0	0	NA	NA	NA	64.771	0	Inf	up	8.4037e-16	1.0516e-15
fve-miR167d	TRINITY_DN8922_c0_g2_i1	TRINITY_DN8922_c0_g2	NA	NA	GO:0006997|nucleus organization;GO:0097298|regulation of nucleus size;GO:0005634|nucleus;GO:0005635|nuclear envelope;GO:0005652|nuclear lamina;GO:0005654|nucleoplasm;GO:0005739|mitochondrion;GO:0005829|cytosol;GO:0031965|nuclear membrane;GO:0034399|nuclear periphery	NA	5674	5694	5686	0.679335	7	GGAGAUCAUGCUGG-AGACUCA&UGAAGCUGCCAGCAUGAUCUCA	12	777.252	2	0.0572036	Output/long789/cleaveLand_result/t_plot/fve-miR167d_TRINITY_DN8922_c0_g2_i1_5686_TPlot.pdf	2	76.0485	3	0.100915	Output/short456/cleaveLand_result/t_plot/fve-miR167d_TRINITY_DN8922_c0_g2_i1_5686_TPlot.pdf	777.252	76.0485	3.35339	up	0	0
fve-miR167d	TRINITY_DN8922_c0_g2_i4	TRINITY_DN8922_c0_g2	NA	NA	GO:0006997|nucleus organization;GO:0097298|regulation of nucleus size;GO:0005634|nucleus;GO:0005635|nuclear envelope;GO:0005652|nuclear lamina;GO:0005654|nucleoplasm;GO:0005739|mitochondrion;GO:0005829|cytosol;GO:0031965|nuclear membrane;GO:0034399|nuclear periphery	NA	4489	4509	4501	0.679335	7	GGAGAUCAUGCUGG-AGACUCA&UGAAGCUGCCAGCAUGAUCUCA	8	518.168	2	0.0581948	Output/long789/cleaveLand_result/t_plot/fve-miR167d_TRINITY_DN8922_c0_g2_i4_4501_TPlot.pdf	4	152.097	3	0.102621	Output/short456/cleaveLand_result/t_plot/fve-miR167d_TRINITY_DN8922_c0_g2_i4_4501_TPlot.pdf	518.168	152.097	1.76843	up	2.0885e-45	6.07611e-45
fve-miR167d	TRINITY_DN8922_c0_g2_i8	TRINITY_DN8922_c0_g2	NA	NA	GO:0006997|nucleus organization;GO:0097298|regulation of nucleus size;GO:0005634|nucleus;GO:0005635|nuclear envelope;GO:0005652|nuclear lamina;GO:0005654|nucleoplasm;GO:0005739|mitochondrion;GO:0005829|cytosol;GO:0031965|nuclear membrane;GO:0034399|nuclear periphery	NA	5028	5048	5040	0.679335	7	GGAGAUCAUGCUGG-AGACUCA&UGAAGCUGCCAGCAUGAUCUCA	13	842.023	2	0.0595148	Output/long789/cleaveLand_result/t_plot/fve-miR167d_TRINITY_DN8922_c0_g2_i8_5040_TPlot.pdf	4	152.097	3	0.104891	Output/short456/cleaveLand_result/t_plot/fve-miR167d_TRINITY_DN8922_c0_g2_i8_5040_TPlot.pdf	842.023	152.097	2.46887	up	0	0
fve-miR167d	TRINITY_DN8922_c0_g2_i9	TRINITY_DN8922_c0_g2	NA	NA	GO:0006997|nucleus organization;GO:0097298|regulation of nucleus size;GO:0005634|nucleus;GO:0005635|nuclear envelope;GO:0005652|nuclear lamina;GO:0005654|nucleoplasm;GO:0005739|mitochondrion;GO:0005829|cytosol;GO:0031965|nuclear membrane;GO:0034399|nuclear periphery	NA	3843	3863	3855	0.679335	7	GGAGAUCAUGCUGG-AGACUCA&UGAAGCUGCCAGCAUGAUCUCA	8	518.168	2	0.058855	Output/long789/cleaveLand_result/t_plot/fve-miR167d_TRINITY_DN8922_c0_g2_i9_3855_TPlot.pdf	2	76.0485	3	0.103757	Output/short456/cleaveLand_result/t_plot/fve-miR167d_TRINITY_DN8922_c0_g2_i9_3855_TPlot.pdf	518.168	76.0485	2.76843	up	1.5465e-73	6.40218e-73
fve-miR530	TRINITY_DN2485_c0_g1_i2	TRINITY_DN2485_c0_g1	NA	NA	GO:0006270|DNA replication initiation;GO:0007049|cell cycle;GO:0005634|nucleus;GO:0042555|MCM complex;GO:0003677|DNA binding;GO:0003678|DNA helicase activity;GO:0005524|ATP binding;GO:0046872|metal ion binding	ko03030	827	848	839	0.779156	6	UGAUGGUGCAGGUGCAGACGCU&UGCAUUUGCACCUGCACC-UCU	2	129.542	3	0.0773298	Output/long789/cleaveLand_result/t_plot/fve-miR530_TRINITY_DN2485_c0_g1_i2_839_TPlot.pdf	1	38.0243	4	0.0514006	Output/short456/cleaveLand_result/t_plot/fve-miR530_TRINITY_DN2485_c0_g1_i2_839_TPlot.pdf	129.542	38.0243	1.76843	up	1.5473e-12	1.90526e-12
fve-miR530	TRINITY_DN2485_c0_g1_i28	TRINITY_DN2485_c0_g1	NA	NA	GO:0006270|DNA replication initiation;GO:0007049|cell cycle;GO:0005634|nucleus;GO:0042555|MCM complex;GO:0003677|DNA binding;GO:0003678|DNA helicase activity;GO:0005524|ATP binding;GO:0046872|metal ion binding	ko03030	827	848	839	0.779156	6	UGAUGGUGCAGGUGCAGACGCU&UGCAUUUGCACCUGCACC-UCU	6	388.626	2	0.044558	Output/long789/cleaveLand_result/t_plot/fve-miR530_TRINITY_DN2485_c0_g1_i28_839_TPlot.pdf	1	38.0243	4	0.0502708	Output/short456/cleaveLand_result/t_plot/fve-miR530_TRINITY_DN2485_c0_g1_i28_839_TPlot.pdf	388.626	38.0243	3.35339	up	1.2452e-64	4.56573e-64
fve-miR530	TRINITY_DN2485_c0_g1_i34	TRINITY_DN2485_c0_g1	NA	NA	GO:0006270|DNA replication initiation;GO:0007049|cell cycle;GO:0005634|nucleus;GO:0042555|MCM complex;GO:0003677|DNA binding;GO:0003678|DNA helicase activity;GO:0005524|ATP binding;GO:0046872|metal ion binding	ko03030	803	824	815	0.779156	6	UGAUGGUGCAGGUGCAGACGCU&UGCAUUUGCACCUGCACC-UCU	6	388.626	2	0.0475683	Output/long789/cleaveLand_result/t_plot/fve-miR530_TRINITY_DN2485_c0_g1_i34_815_TPlot.pdf	0	0	NA	NA	NA	388.626	0	Inf	up	1.5868e-86	7.5422e-86
fve-miR530	TRINITY_DN2485_c0_g1_i35	TRINITY_DN2485_c0_g1	NA	NA	GO:0000727|double-strand break repair via break-induced replication;GO:0006267|pre-replicative complex assembly involved in nuclear cell cycle DNA replication;GO:0006268|DNA unwinding involved in DNA replication;GO:0006270|DNA replication initiation;GO:1902969|mitotic DNA replication;GO:0000347|THO complex;GO:0005634|nucleus;GO:0042555|MCM complex;GO:0003678|DNA helicase activity;GO:0003688|DNA r…	ko03030	2309	2330	2321	0.779156	6	UGAUGGUGCAGGUGCAGACGCU&UGCAUUUGCACCUGCACC-UCU	4	259.084	3	0.0801173	Output/long789/cleaveLand_result/t_plot/fve-miR530_TRINITY_DN2485_c0_g1_i35_2321_TPlot.pdf	0	0	NA	NA	NA	259.084	0	Inf	up	2.672e-58	8.29613e-58
fve-miR530	TRINITY_DN2485_c0_g1_i4	TRINITY_DN2485_c0_g1	NA	NA	GO:0006270|DNA replication initiation;GO:0007049|cell cycle;GO:0005634|nucleus;GO:0042555|MCM complex;GO:0003677|DNA binding;GO:0003678|DNA helicase activity;GO:0005524|ATP binding;GO:0046872|metal ion binding	ko03030	803	824	815	0.779156	6	UGAUGGUGCAGGUGCAGACGCU&UGCAUUUGCACCUGCACC-UCU	3	194.313	3	0.0790033	Output/long789/cleaveLand_result/t_plot/fve-miR530_TRINITY_DN2485_c0_g1_i4_815_TPlot.pdf	3	114.073	3	0.0825114	Output/short456/cleaveLand_result/t_plot/fve-miR530_TRINITY_DN2485_c0_g1_i4_815_TPlot.pdf	194.313	114.073	0.768429	up	4.8864e-06	5.18255e-06
fve-miR530	TRINITY_DN2485_c0_g1_i7	TRINITY_DN2485_c0_g1	NA	NA	GO:0006270|DNA replication initiation;GO:0007049|cell cycle;GO:0005634|nucleus;GO:0042555|MCM complex;GO:0003677|DNA binding;GO:0003678|DNA helicase activity;GO:0005524|ATP binding;GO:0046872|metal ion binding	ko03030	630	651	642	0.779156	6	UGAUGGUGCAGGUGCAGACGCU&UGCAUUUGCACCUGCACC-UCU	3	194.313	3	0.0728522	Output/long789/cleaveLand_result/t_plot/fve-miR530_TRINITY_DN2485_c0_g1_i7_642_TPlot.pdf	0	0	NA	NA	NA	194.313	0	Inf	up	3.6042e-44	8.09893e-44
fve-miR530	TRINITY_DN41242_c1_g1_i2	TRINITY_DN41242_c1_g1	NA	NA	NA	NA	305	324	316	0.650124	6.5	GGAGGUGGAGGGGCAAA-GCC&UGCAUUUGCACCUGCACCUCU	0	0	NA	NA	NA	46	1749.12	2	0.30232	Output/short456/cleaveLand_result/t_plot/fve-miR530_TRINITY_DN41242_c1_g1_i2_316_TPlot.pdf	0	1749.12	-Inf	down	0	0
fve-miR530	TRINITY_DN74238_c0_g2_i1	TRINITY_DN74238_c0_g2	NA	NA	NA	NA	26	48	39	0.724566	7	AGUGGUGCAGUCGUGUAGAUGCA&UGCAUUUGCAC--CUGCACCUCU	1	64.771	4	0.102582	Output/long789/cleaveLand_result/t_plot/fve-miR530_TRINITY_DN74238_c0_g2_i1_39_TPlot.pdf	19	722.461	3	0.190109	Output/short456/cleaveLand_result/t_plot/fve-miR530_TRINITY_DN74238_c0_g2_i1_39_TPlot.pdf	64.771	722.461	-3.4795	down	0	0
fve-miR530	TRINITY_DN74238_c0_g2_i2	TRINITY_DN74238_c0_g2	NA	NA	NA	NA	26	48	39	0.724566	7	AGUGGUGCAGUCGUGUAGAUGCA&UGCAUUUGCAC--CUGCACCUCU	0	0	NA	NA	NA	16	608.388	3	0.187541	Output/short456/cleaveLand_result/t_plot/fve-miR530_TRINITY_DN74238_c0_g2_i2_39_TPlot.pdf	0	608.388	-Inf	down	0	0
ghr-miR156c	TRINITY_DN17771_c0_g1_i1	TRINITY_DN17771_c0_g1	NA	NA	NA	NA	13	32	23	0.830645	3	GUGCUCUCUCUCUUCUGUCA&UGUCAGAAGAGAGUGAGCAC	3	194.313	3	0.0150146	Output/long789/cleaveLand_result/t_plot/ghr-miR156c_TRINITY_DN17771_c0_g1_i1_23_TPlot.pdf	0	0	NA	NA	NA	194.313	0	Inf	up	3.6042e-44	8.09893e-44
ghr-miR156c	TRINITY_DN6217_c0_g1_i3	TRINITY_DN6217_c0_g1	NA	NA	NA	NA	274	293	284	0.693548	6	GUGCUCUCUCUCCUCUGUCG&UGUCAGAAGAGAGUGAGCAC	4	259.084	3	0.192828	Output/long789/cleaveLand_result/t_plot/ghr-miR156c_TRINITY_DN6217_c0_g1_i3_284_TPlot.pdf	1	38.0243	4	0.131035	Output/short456/cleaveLand_result/t_plot/ghr-miR156c_TRINITY_DN6217_c0_g1_i3_284_TPlot.pdf	259.084	38.0243	2.76843	up	1.1756e-37	2.42901e-37
ghr-miR156c	TRINITY_DN6217_c0_g1_i7	TRINITY_DN6217_c0_g1	NA	NA	NA	NA	274	293	284	0.693548	6	GUGCUCUCUCUCCUCUGUCG&UGUCAGAAGAGAGUGAGCAC	1	64.771	4	0.108397	Output/long789/cleaveLand_result/t_plot/ghr-miR156c_TRINITY_DN6217_c0_g1_i7_284_TPlot.pdf	1	38.0243	4	0.13069	Output/short456/cleaveLand_result/t_plot/ghr-miR156c_TRINITY_DN6217_c0_g1_i7_284_TPlot.pdf	64.771	38.0243	0.768429	up	0.0083365	0.00847593
ghr-miR156c	TRINITY_DN6217_c0_g1_i8	TRINITY_DN6217_c0_g1	NA	NA	NA	NA	274	293	284	0.693548	6	GUGCUCUCUCUCCUCUGUCG&UGUCAGAAGAGAGUGAGCAC	3	194.313	3	0.201573	Output/long789/cleaveLand_result/t_plot/ghr-miR156c_TRINITY_DN6217_c0_g1_i8_284_TPlot.pdf	1	38.0243	4	0.137218	Output/short456/cleaveLand_result/t_plot/ghr-miR156c_TRINITY_DN6217_c0_g1_i8_284_TPlot.pdf	194.313	38.0243	2.35339	up	1.1354e-24	1.84702e-24
ghr-miR156c	TRINITY_DN9504_c0_g1_i1	TRINITY_DN9504_c0_g1	NA	NA	GO:0005886|plasma membrane;GO:0016021|integral component of membrane;GO:0005524|ATP binding;GO:0106310|protein serine kinase activity;GO:0106311|protein threonine kinase activity	NA	1947	1966	1957	0.830645	3	GUGCUCUCUCUCUUCUGUCA&UGUCAGAAGAGAGUGAGCAC	1	64.771	4	0.00680231	Output/long789/cleaveLand_result/t_plot/ghr-miR156c_TRINITY_DN9504_c0_g1_i1_1957_TPlot.pdf	0	0	NA	NA	NA	64.771	0	Inf	up	8.4037e-16	1.0516e-15
ghr-miR156c	TRINITY_DN9504_c0_g1_i11	TRINITY_DN9504_c0_g1	NA	NA	GO:0005886|plasma membrane;GO:0016021|integral component of membrane;GO:0005524|ATP binding;GO:0106310|protein serine kinase activity;GO:0106311|protein threonine kinase activity	NA	1730	1749	1740	0.830645	3	GUGCUCUCUCUCUUCUGUCA&UGUCAGAAGAGAGUGAGCAC	3	194.313	3	0.0132248	Output/long789/cleaveLand_result/t_plot/ghr-miR156c_TRINITY_DN9504_c0_g1_i11_1740_TPlot.pdf	0	0	NA	NA	NA	194.313	0	Inf	up	3.6042e-44	8.09893e-44
ghr-miR156c	TRINITY_DN9504_c0_g1_i6	TRINITY_DN9504_c0_g1	NA	NA	GO:0005886|plasma membrane;GO:0016021|integral component of membrane;GO:0005524|ATP binding;GO:0106310|protein serine kinase activity;GO:0106311|protein threonine kinase activity	NA	814	833	824	0.830645	3	GUGCUCUCUCUCUUCUGUCA&UGUCAGAAGAGAGUGAGCAC	3	194.313	3	0.0138218	Output/long789/cleaveLand_result/t_plot/ghr-miR156c_TRINITY_DN9504_c0_g1_i6_824_TPlot.pdf	0	0	NA	NA	NA	194.313	0	Inf	up	3.6042e-44	8.09893e-44
gma-miR156k	TRINITY_DN5374_c0_g1_i9	TRINITY_DN5374_c0_g1	NA	NA	GO:0006952|defense response;GO:0010200|response to chitin;GO:0005634|nucleus;GO:0000976|transcription regulatory region sequence-specific DNA binding;GO:0003700|DNA-binding transcription factor activity;GO:0043565|sequence-specific DNA binding	NA	247	266	257	0.662304	5.5	AGGCUC-UUCUCUUCUGUUAC&UUGACAGAAGAGAGUGAGCAC	0	0	NA	NA	NA	1	38.0243	4	0.182864	Output/short456/cleaveLand_result/t_plot/gma-miR156k_TRINITY_DN5374_c0_g1_i9_257_TPlot.pdf	0	38.0243	-Inf	down	6.9845e-10	7.47646e-10
gma-miR156q	TRINITY_DN17771_c0_g1_i1	TRINITY_DN17771_c0_g1	NA	NA	NA	NA	12	32	23	0.907216	2	CGUGCUCUCUCUCUUCUGUCA&UGACAGAAGAGAGUGAGCACU	3	194.313	3	0.0173959	Output/long789/cleaveLand_result/t_plot/gma-miR156q_TRINITY_DN17771_c0_g1_i1_23_TPlot.pdf	0	0	NA	NA	NA	194.313	0	Inf	up	3.6042e-44	8.09893e-44
gma-miR156q	TRINITY_DN6217_c0_g1_i3	TRINITY_DN6217_c0_g1	NA	NA	NA	NA	273	293	284	0.775773	5	CGUGCUCUCUCUCCUCUGUCG&UGACAGAAGAGAGUGAGCACU	4	259.084	3	0.0315635	Output/long789/cleaveLand_result/t_plot/gma-miR156q_TRINITY_DN6217_c0_g1_i3_284_TPlot.pdf	1	38.0243	4	0.0208086	Output/short456/cleaveLand_result/t_plot/gma-miR156q_TRINITY_DN6217_c0_g1_i3_284_TPlot.pdf	259.084	38.0243	2.76843	up	1.1756e-37	2.42901e-37
gma-miR156q	TRINITY_DN6217_c0_g1_i7	TRINITY_DN6217_c0_g1	NA	NA	NA	NA	273	293	284	0.775773	5	CGUGCUCUCUCUCCUCUGUCG&UGACAGAAGAGAGUGAGCACU	1	64.771	4	0.0167593	Output/long789/cleaveLand_result/t_plot/gma-miR156q_TRINITY_DN6217_c0_g1_i7_284_TPlot.pdf	1	38.0243	4	0.02042	Output/short456/cleaveLand_result/t_plot/gma-miR156q_TRINITY_DN6217_c0_g1_i7_284_TPlot.pdf	64.771	38.0243	0.768429	up	0.0083365	0.00847593
gma-miR156q	TRINITY_DN6217_c0_g1_i8	TRINITY_DN6217_c0_g1	NA	NA	NA	NA	273	293	284	0.775773	5	CGUGCUCUCUCUCCUCUGUCG&UGACAGAAGAGAGUGAGCACU	3	194.313	3	0.0321493	Output/long789/cleaveLand_result/t_plot/gma-miR156q_TRINITY_DN6217_c0_g1_i8_284_TPlot.pdf	1	38.0243	4	0.021197	Output/short456/cleaveLand_result/t_plot/gma-miR156q_TRINITY_DN6217_c0_g1_i8_284_TPlot.pdf	194.313	38.0243	2.35339	up	1.1354e-24	1.84702e-24
gma-miR156q	TRINITY_DN9504_c0_g1_i1	TRINITY_DN9504_c0_g1	NA	NA	GO:0005886|plasma membrane;GO:0016021|integral component of membrane;GO:0005524|ATP binding;GO:0106310|protein serine kinase activity;GO:0106311|protein threonine kinase activity	NA	1946	1966	1957	0.907216	2	CGUGCUCUCUCUCUUCUGUCA&UGACAGAAGAGAGUGAGCACU	1	64.771	4	0.00809273	Output/long789/cleaveLand_result/t_plot/gma-miR156q_TRINITY_DN9504_c0_g1_i1_1957_TPlot.pdf	0	0	NA	NA	NA	64.771	0	Inf	up	8.4037e-16	1.0516e-15
gma-miR156q	TRINITY_DN9504_c0_g1_i11	TRINITY_DN9504_c0_g1	NA	NA	GO:0005886|plasma membrane;GO:0016021|integral component of membrane;GO:0005524|ATP binding;GO:0106310|protein serine kinase activity;GO:0106311|protein threonine kinase activity	NA	1729	1749	1740	0.907216	2	CGUGCUCUCUCUCUUCUGUCA&UGACAGAAGAGAGUGAGCACU	3	194.313	3	0.0156105	Output/long789/cleaveLand_result/t_plot/gma-miR156q_TRINITY_DN9504_c0_g1_i11_1740_TPlot.pdf	0	0	NA	NA	NA	194.313	0	Inf	up	3.6042e-44	8.09893e-44
gma-miR156q	TRINITY_DN9504_c0_g1_i6	TRINITY_DN9504_c0_g1	NA	NA	GO:0005886|plasma membrane;GO:0016021|integral component of membrane;GO:0005524|ATP binding;GO:0106310|protein serine kinase activity;GO:0106311|protein threonine kinase activity	NA	813	833	824	0.907216	2	CGUGCUCUCUCUCUUCUGUCA&UGACAGAAGAGAGUGAGCACU	3	194.313	3	0.016206	Output/long789/cleaveLand_result/t_plot/gma-miR156q_TRINITY_DN9504_c0_g1_i6_824_TPlot.pdf	0	0	NA	NA	NA	194.313	0	Inf	up	3.6042e-44	8.09893e-44
gma-miR159a-5p	TRINITY_DN230_c7_g1_i1	TRINITY_DN230_c7_g1	NA	NA	GO:0000271|polysaccharide biosynthetic process;GO:0009969|xyloglucan biosynthetic process;GO:0010411|xyloglucan metabolic process;GO:0000138|Golgi trans cisterna;GO:0000139|Golgi membrane;GO:0005768|endosome;GO:0005794|Golgi apparatus;GO:0005802|trans-Golgi network;GO:0005829|cytosol;GO:0016021|integral component of membrane;GO:0016758|transferase activity, transferring hexosyl groups;GO:0033843|…	NA	293	313	304	0.690027	7	GAGCAGGACUUCAAGGAGAUC&GAGCUCCUUGAAGUCCAAUUG	2	129.542	3	0.170546	Output/long789/cleaveLand_result/t_plot/gma-miR159a-5p_TRINITY_DN230_c7_g1_i1_304_TPlot.pdf	0	0	NA	NA	NA	129.542	0	Inf	up	5.1393e-30	9.14621e-30
gma-miR159a-5p	TRINITY_DN3066_c0_g1_i5	TRINITY_DN3066_c0_g1	NA	NA	NA	NA	28	47	39	0.665768	7	UUCUUGGACUUU-AGGAGCUG&GAGCUCCUUGAAGUCCAAUUG	2	129.542	3	0.250726	Output/long789/cleaveLand_result/t_plot/gma-miR159a-5p_TRINITY_DN3066_c0_g1_i5_39_TPlot.pdf	0	0	NA	NA	NA	129.542	0	Inf	up	5.1393e-30	9.14621e-30
gma-miR159a-5p	TRINITY_DN3066_c0_g2_i1	TRINITY_DN3066_c0_g2	NA	NA	GO:0009901|anther dehiscence;GO:0010584|pollen exine formation;GO:0016021|integral component of membrane;GO:0005524|ATP binding;GO:0102485|dATP phosphohydrolase activity;GO:0102486|dCTP phosphohydrolase activity;GO:0102487|dUTP phosphohydrolase activity;GO:0102488|dTTP phosphohydrolase activity;GO:0102489|GTP phosphohydrolase activity;GO:0102490|8-oxo-dGTP phosphohydrolase activity;GO:0102491|dGT…	NA	1883	1902	1894	0.665768	7	UUCUUGGACUUU-AGGAGCUG&GAGCUCCUUGAAGUCCAAUUG	2	129.542	3	0.24891	Output/long789/cleaveLand_result/t_plot/gma-miR159a-5p_TRINITY_DN3066_c0_g2_i1_1894_TPlot.pdf	0	0	NA	NA	NA	129.542	0	Inf	up	5.1393e-30	9.14621e-30
gma-miR159a-5p	TRINITY_DN3066_c0_g2_i2	TRINITY_DN3066_c0_g2	NA	NA	GO:0009901|anther dehiscence;GO:0010584|pollen exine formation;GO:0016021|integral component of membrane;GO:0005524|ATP binding;GO:0102485|dATP phosphohydrolase activity;GO:0102486|dCTP phosphohydrolase activity;GO:0102487|dUTP phosphohydrolase activity;GO:0102488|dTTP phosphohydrolase activity;GO:0102489|GTP phosphohydrolase activity;GO:0102490|8-oxo-dGTP phosphohydrolase activity;GO:0102491|dGT…	NA	1808	1827	1819	0.665768	7	UUCUUGGACUUU-AGGAGCUG&GAGCUCCUUGAAGUCCAAUUG	1	64.771	4	0.146673	Output/long789/cleaveLand_result/t_plot/gma-miR159a-5p_TRINITY_DN3066_c0_g2_i2_1819_TPlot.pdf	0	0	NA	NA	NA	64.771	0	Inf	up	8.4037e-16	1.0516e-15
gma-miR159e-5p	TRINITY_DN230_c7_g1_i1	TRINITY_DN230_c7_g1	NA	NA	GO:0000271|polysaccharide biosynthetic process;GO:0009969|xyloglucan biosynthetic process;GO:0010411|xyloglucan metabolic process;GO:0000138|Golgi trans cisterna;GO:0000139|Golgi membrane;GO:0005768|endosome;GO:0005794|Golgi apparatus;GO:0005802|trans-Golgi network;GO:0005829|cytosol;GO:0016021|integral component of membrane;GO:0016758|transferase activity, transferring hexosyl groups;GO:0033843|…	NA	294	313	304	0.742029	6	AGCAGGACUUCAAGGAGAUC&GAGCUCCUUGAAGUCCAAUU	2	129.542	3	0.15943	Output/long789/cleaveLand_result/t_plot/gma-miR159e-5p_TRINITY_DN230_c7_g1_i1_304_TPlot.pdf	0	0	NA	NA	NA	129.542	0	Inf	up	5.1393e-30	9.14621e-30
gma-miR159e-5p	TRINITY_DN3066_c0_g1_i5	TRINITY_DN3066_c0_g1	NA	NA	NA	NA	29	47	39	0.715942	6	UCUUGGACUUU-AGGAGCUG&GAGCUCCUUGAAGUCCAAUU	2	129.542	3	0.254796	Output/long789/cleaveLand_result/t_plot/gma-miR159e-5p_TRINITY_DN3066_c0_g1_i5_39_TPlot.pdf	0	0	NA	NA	NA	129.542	0	Inf	up	5.1393e-30	9.14621e-30
gma-miR159e-5p	TRINITY_DN3066_c0_g2_i1	TRINITY_DN3066_c0_g2	NA	NA	GO:0009901|anther dehiscence;GO:0010584|pollen exine formation;GO:0016021|integral component of membrane;GO:0005524|ATP binding;GO:0102485|dATP phosphohydrolase activity;GO:0102486|dCTP phosphohydrolase activity;GO:0102487|dUTP phosphohydrolase activity;GO:0102488|dTTP phosphohydrolase activity;GO:0102489|GTP phosphohydrolase activity;GO:0102490|8-oxo-dGTP phosphohydrolase activity;GO:0102491|dGT…	NA	1884	1902	1894	0.715942	6	UCUUGGACUUU-AGGAGCUG&GAGCUCCUUGAAGUCCAAUU	2	129.542	3	0.250273	Output/long789/cleaveLand_result/t_plot/gma-miR159e-5p_TRINITY_DN3066_c0_g2_i1_1894_TPlot.pdf	0	0	NA	NA	NA	129.542	0	Inf	up	5.1393e-30	9.14621e-30
gma-miR159e-5p	TRINITY_DN3066_c0_g2_i2	TRINITY_DN3066_c0_g2	NA	NA	GO:0009901|anther dehiscence;GO:0010584|pollen exine formation;GO:0016021|integral component of membrane;GO:0005524|ATP binding;GO:0102485|dATP phosphohydrolase activity;GO:0102486|dCTP phosphohydrolase activity;GO:0102487|dUTP phosphohydrolase activity;GO:0102488|dTTP phosphohydrolase activity;GO:0102489|GTP phosphohydrolase activity;GO:0102490|8-oxo-dGTP phosphohydrolase activity;GO:0102491|dGT…	NA	1809	1827	1819	0.715942	6	UCUUGGACUUU-AGGAGCUG&GAGCUCCUUGAAGUCCAAUU	1	64.771	4	0.151927	Output/long789/cleaveLand_result/t_plot/gma-miR159e-5p_TRINITY_DN3066_c0_g2_i2_1819_TPlot.pdf	0	0	NA	NA	NA	64.771	0	Inf	up	8.4037e-16	1.0516e-15
gma-miR160c	TRINITY_DN11899_c1_g1_i5	TRINITY_DN11899_c1_g1	NA	NA	NA	NA	767	786	778	0.655251	6.5	UGCAAAACGGGG-GCCAGGCC&UGCCUGGCUCCCUGU-AUGCC	57	3691.95	0	0.0951413	Output/long789/cleaveLand_result/t_plot/gma-miR160c_TRINITY_DN11899_c1_g1_i5_778_TPlot.pdf	1	38.0243	4	0.340189	Output/short456/cleaveLand_result/t_plot/gma-miR160c_TRINITY_DN11899_c1_g1_i5_778_TPlot.pdf	3691.95	38.0243	6.60132	up	0	0
gma-miR160c	TRINITY_DN73089_c0_g1_i1	TRINITY_DN73089_c0_g1	NA	NA	GO:0006355|regulation of transcription, DNA-templated;GO:0009734|auxin-activated signaling pathway;GO:0005634|nucleus;GO:0003677|DNA binding	NA	1588	1607	1598	0.853881	2	AGCAUCCAGGGAGCCAGGCA&UGCCUGGCUCCCUGUAUGCC	2	129.542	0	0.00200134	Output/long789/cleaveLand_result/t_plot/gma-miR160c_TRINITY_DN73089_c0_g1_i1_1598_TPlot.pdf	0	0	NA	NA	NA	129.542	0	Inf	up	5.1393e-30	9.14621e-30
gma-miR160c	TRINITY_DN73089_c0_g1_i2	TRINITY_DN73089_c0_g1	NA	NA	GO:0006355|regulation of transcription, DNA-templated;GO:0009734|auxin-activated signaling pathway;GO:0005634|nucleus;GO:0003677|DNA binding	NA	1588	1607	1598	0.853881	2	AGCAUCCAGGGAGCCAGGCA&UGCCUGGCUCCCUGUAUGCC	1	64.771	4	0.00615647	Output/long789/cleaveLand_result/t_plot/gma-miR160c_TRINITY_DN73089_c0_g1_i2_1598_TPlot.pdf	0	0	NA	NA	NA	64.771	0	Inf	up	8.4037e-16	1.0516e-15
gma-miR160c	TRINITY_DN7361_c0_g1_i13	TRINITY_DN7361_c0_g1	NA	NA	GO:0006355|regulation of transcription, DNA-templated;GO:0009734|auxin-activated signaling pathway;GO:0005634|nucleus;GO:0003677|DNA binding	NA	566	585	576	0.853881	2	AGCAUUCAGGGAGCCAGGCA&UGCCUGGCUCCCUGUAUGCC	0	0	NA	NA	NA	1	38.0243	4	0.00869067	Output/short456/cleaveLand_result/t_plot/gma-miR160c_TRINITY_DN7361_c0_g1_i13_576_TPlot.pdf	0	38.0243	-Inf	down	6.9845e-10	7.47646e-10
gma-miR160c	TRINITY_DN7361_c0_g1_i7	TRINITY_DN7361_c0_g1	NA	NA	GO:0006355|regulation of transcription, DNA-templated;GO:0009734|auxin-activated signaling pathway;GO:0005634|nucleus;GO:0003677|DNA binding	NA	1648	1667	1658	0.853881	2	AGCAUUCAGGGAGCCAGGCA&UGCCUGGCUCCCUGUAUGCC	0	0	NA	NA	NA	1	38.0243	4	0.00672218	Output/short456/cleaveLand_result/t_plot/gma-miR160c_TRINITY_DN7361_c0_g1_i7_1658_TPlot.pdf	0	38.0243	-Inf	down	6.9845e-10	7.47646e-10
gma-miR160c	TRINITY_DN7361_c0_g1_i9	TRINITY_DN7361_c0_g1	NA	NA	GO:0006355|regulation of transcription, DNA-templated;GO:0009734|auxin-activated signaling pathway;GO:0005634|nucleus;GO:0003677|DNA binding	NA	1648	1667	1658	0.853881	2	AGCAUUCAGGGAGCCAGGCA&UGCCUGGCUCCCUGUAUGCC	0	0	NA	NA	NA	1	38.0243	4	0.00790374	Output/short456/cleaveLand_result/t_plot/gma-miR160c_TRINITY_DN7361_c0_g1_i9_1658_TPlot.pdf	0	38.0243	-Inf	down	6.9845e-10	7.47646e-10
gma-miR168b	TRINITY_DN11951_c0_g2_i2	TRINITY_DN11951_c0_g2	NA	NA	GO:0009624|response to nematode;GO:0005886|plasma membrane	ko04626	597	616	607	0.681373	6	AGCGAUCCUGCAUCAGGUGA&UCGCUUGGUGCAGG-UCGGG	9	582.939	2	0.404631	Output/long789/cleaveLand_result/t_plot/gma-miR168b_TRINITY_DN11951_c0_g2_i2_607_TPlot.pdf	0	0	NA	NA	NA	582.939	0	Inf	up	0	0
gma-miR168b	TRINITY_DN11951_c0_g2_i4	TRINITY_DN11951_c0_g2	NA	NA	GO:0002237|response to molecule of bacterial origin;GO:0006468|protein phosphorylation;GO:0009626|plant-type hypersensitive response;GO:0034051|negative regulation of plant-type hypersensitive response;GO:0005829|cytosol;GO:0005886|plasma membrane;GO:0012505|endomembrane system;GO:0016020|membrane;GO:0019897|extrinsic component of plasma membrane	ko04626	597	616	607	0.681373	6	AGCGAUCCUGCAUCAGGUGA&UCGCUUGGUGCAGG-UCGGG	14	906.794	0	0.126606	Output/long789/cleaveLand_result/t_plot/gma-miR168b_TRINITY_DN11951_c0_g2_i4_607_TPlot.pdf	0	0	NA	NA	NA	906.794	0	Inf	up	0	0
gma-miR168b	TRINITY_DN11951_c0_g2_i8	TRINITY_DN11951_c0_g2	NA	NA	GO:0009624|response to nematode;GO:0005886|plasma membrane	ko04626	597	616	607	0.681373	6	AGCGAUCCUGCAUCAGGUGA&UCGCUUGGUGCAGG-UCGGG	14	906.794	2	0.400231	Output/long789/cleaveLand_result/t_plot/gma-miR168b_TRINITY_DN11951_c0_g2_i8_607_TPlot.pdf	0	0	NA	NA	NA	906.794	0	Inf	up	0	0
gma-miR168b	TRINITY_DN2640_c1_g1_i1	TRINITY_DN2640_c1_g1	NA	NA	GO:0006417|regulation of translation;GO:0009616|RNAi-mediated antiviral immune response;GO:0009733|response to auxin;GO:0009850|auxin metabolic process;GO:0009955|adaxial/abaxial pattern specification;GO:0009965|leaf morphogenesis;GO:0010218|response to far red light;GO:0010305|leaf vascular tissue pattern formation;GO:0010589|leaf proximal/distal pattern formation;GO:0016032|viral process;GO:001…	NA	640	658	649	0.845588	4	CCCGAGCUGCACCAAGCUA&UCGCUUGGUGCAGGUCGGG	3	194.313	3	0.0150146	Output/long789/cleaveLand_result/t_plot/gma-miR168b_TRINITY_DN2640_c1_g1_i1_649_TPlot.pdf	0	0	NA	NA	NA	194.313	0	Inf	up	3.6042e-44	8.09893e-44
gma-miR168b	TRINITY_DN2640_c1_g1_i2	TRINITY_DN2640_c1_g1	NA	NA	GO:0006417|regulation of translation;GO:0009616|RNAi-mediated antiviral immune response;GO:0009733|response to auxin;GO:0009850|auxin metabolic process;GO:0009955|adaxial/abaxial pattern specification;GO:0009965|leaf morphogenesis;GO:0010218|response to far red light;GO:0010305|leaf vascular tissue pattern formation;GO:0010589|leaf proximal/distal pattern formation;GO:0016032|viral process;GO:001…	NA	640	658	649	0.845588	4	CCCGAGCUGCACCAAGCUA&UCGCUUGGUGCAGGUCGGG	3	194.313	3	0.0144184	Output/long789/cleaveLand_result/t_plot/gma-miR168b_TRINITY_DN2640_c1_g1_i2_649_TPlot.pdf	0	0	NA	NA	NA	194.313	0	Inf	up	3.6042e-44	8.09893e-44
gma-miR168b	TRINITY_DN5396_c0_g1_i12	TRINITY_DN5396_c0_g1	NA	NA	NA	NA	2032	2050	2041	0.808824	5	UACGACCUGCACCAAGCAU&UCGCUUGGUGCAGGUCGGG	0	0	NA	NA	NA	2	76.0485	3	0.0445667	Output/short456/cleaveLand_result/t_plot/gma-miR168b_TRINITY_DN5396_c0_g1_i12_2041_TPlot.pdf	0	76.0485	-Inf	down	2.7637e-18	4.06116e-18
gma-miR168b	TRINITY_DN5396_c0_g1_i9	TRINITY_DN5396_c0_g1	NA	NA	NA	NA	1732	1750	1741	0.808824	5	UACGACCUGCACCAAGCAU&UCGCUUGGUGCAGGUCGGG	0	0	NA	NA	NA	2	76.0485	3	0.043356	Output/short456/cleaveLand_result/t_plot/gma-miR168b_TRINITY_DN5396_c0_g1_i9_1741_TPlot.pdf	0	76.0485	-Inf	down	2.7637e-18	4.06116e-18
gma-miR171l	TRINITY_DN544_c0_g1_i8	TRINITY_DN544_c0_g1	NA	NA	GO:0006636|unsaturated fatty acid biosynthetic process;GO:0016021|integral component of membrane;GO:0016717|oxidoreductase activity, acting on paired donors, with oxidation of a pair of donors resulting in the reduction of molecular oxygen to two molecules of water	ko01040;ko01212	959	979	969	0.657534	6.5	GAG-GAGCCUUAUCAACAAUCG&CGAU-GUUGGUGAGGUUCAAUC	1	64.771	4	0.349074	Output/long789/cleaveLand_result/t_plot/gma-miR171l_TRINITY_DN544_c0_g1_i8_969_TPlot.pdf	58	2205.41	2	0.401968	Output/short456/cleaveLand_result/t_plot/gma-miR171l_TRINITY_DN544_c0_g1_i8_969_TPlot.pdf	64.771	2205.41	-5.08955	down	0	0
gma-miR396e	TRINITY_DN178_c0_g1_i16	TRINITY_DN178_c0_g1	NA	NA	GO:0009555|pollen development;GO:0009860|pollen tube growth;GO:0052325|cell wall pectin biosynthetic process;GO:0000139|Golgi membrane;GO:0005794|Golgi apparatus;GO:0016021|integral component of membrane;GO:0090406|pollen tube;GO:0047262|polygalacturonate 4-alpha-galacturonosyltransferase activity	NA	2556	2576	2567	0.744565	5	CCAGUUCUUG-AAGCUGUGGAA&UUCCACAGCUUUCUUGAACUGU	1	64.771	4	0.028513	Output/long789/cleaveLand_result/t_plot/gma-miR396e_TRINITY_DN178_c0_g1_i16_2567_TPlot.pdf	0	0	NA	NA	NA	64.771	0	Inf	up	8.4037e-16	1.0516e-15
gma-miR396e	TRINITY_DN178_c0_g1_i5	TRINITY_DN178_c0_g1	NA	NA	GO:0009555|pollen development;GO:0009860|pollen tube growth;GO:0048358|mucilage pectin biosynthetic process;GO:0052325|cell wall pectin biosynthetic process;GO:0000139|Golgi membrane;GO:0005794|Golgi apparatus;GO:0016021|integral component of membrane;GO:0090406|pollen tube;GO:0047262|polygalacturonate 4-alpha-galacturonosyltransferase activity	NA	1281	1301	1292	0.744565	5	CCAGUUCUUG-AAGCUGUGGAA&UUCCACAGCUUUCUUGAACUGU	1	64.771	4	0.0278812	Output/long789/cleaveLand_result/t_plot/gma-miR396e_TRINITY_DN178_c0_g1_i5_1292_TPlot.pdf	0	0	NA	NA	NA	64.771	0	Inf	up	8.4037e-16	1.0516e-15
gma-miR396e	TRINITY_DN8746_c0_g1_i1	TRINITY_DN8746_c0_g1	NA	NA	GO:0006351|transcription, DNA-templated;GO:0006355|regulation of transcription, DNA-templated;GO:0032502|developmental process;GO:0005634|nucleus;GO:0005524|ATP binding	NA	457	479	469	0.788043	5	AUCGUUCAAGAAAGCCUGUGGAA&UUCCACAG-CUUUCUUGAACUGU	20	1295.42	0	0.00390365	Output/long789/cleaveLand_result/t_plot/gma-miR396e_TRINITY_DN8746_c0_g1_i1_469_TPlot.pdf	15	570.364	0	0.00391328	Output/short456/cleaveLand_result/t_plot/gma-miR396e_TRINITY_DN8746_c0_g1_i1_469_TPlot.pdf	1295.42	570.364	1.18347	up	2.7182e-63	9.66006e-63
gma-miR396e	TRINITY_DN8746_c0_g1_i13	TRINITY_DN8746_c0_g1	NA	NA	GO:0006351|transcription, DNA-templated;GO:0006355|regulation of transcription, DNA-templated;GO:0032502|developmental process;GO:0005634|nucleus;GO:0005524|ATP binding	NA	457	479	469	0.788043	5	AUCGUUCAAGAAAGCCUGUGGAA&UUCCACAG-CUUUCUUGAACUGU	26	1684.05	0	0.00380862	Output/long789/cleaveLand_result/t_plot/gma-miR396e_TRINITY_DN8746_c0_g1_i13_469_TPlot.pdf	30	1140.73	3	0.0250099	Output/short456/cleaveLand_result/t_plot/gma-miR396e_TRINITY_DN8746_c0_g1_i13_469_TPlot.pdf	1684.05	1140.73	0.561978	up	1.4572e-24	2.33759e-24
gma-miR396e	TRINITY_DN8746_c0_g1_i14	TRINITY_DN8746_c0_g1	NA	NA	GO:0006351|transcription, DNA-templated;GO:0006355|regulation of transcription, DNA-templated;GO:0032502|developmental process;GO:0005634|nucleus;GO:0005524|ATP binding	NA	457	479	469	0.788043	5	AUCGUUCAAGAAAGCCUGUGGAA&UUCCACAG-CUUUCUUGAACUGU	12	777.252	0	0.00418869	Output/long789/cleaveLand_result/t_plot/gma-miR396e_TRINITY_DN8746_c0_g1_i14_469_TPlot.pdf	25	950.606	3	0.0274762	Output/short456/cleaveLand_result/t_plot/gma-miR396e_TRINITY_DN8746_c0_g1_i14_469_TPlot.pdf	777.252	950.606	-0.290465	down	3.0164e-05	3.1701e-05
gma-miR396e	TRINITY_DN8746_c0_g1_i16	TRINITY_DN8746_c0_g1	NA	NA	GO:0006351|transcription, DNA-templated;GO:0006355|regulation of transcription, DNA-templated;GO:0032502|developmental process;GO:0005634|nucleus;GO:0005524|ATP binding	NA	530	552	542	0.80163	3	ACCGUUCAAGAAAGCCUGUGGAA&UUCCACAG-CUUUCUUGAACUGU	9	582.939	3	0.0144184	Output/long789/cleaveLand_result/t_plot/gma-miR396e_TRINITY_DN8746_c0_g1_i16_542_TPlot.pdf	0	0	NA	NA	NA	582.939	0	Inf	up	0	0
gma-miR396e	TRINITY_DN8746_c0_g1_i18	TRINITY_DN8746_c0_g1	NA	NA	GO:0006351|transcription, DNA-templated;GO:0006355|regulation of transcription, DNA-templated;GO:0032502|developmental process;GO:0005634|nucleus;GO:0005524|ATP binding	NA	1628	1650	1640	0.80163	3	ACCGUUCAAGAAAGCCUGUGGAA&UUCCACAG-CUUUCUUGAACUGU	9	582.939	3	0.0150146	Output/long789/cleaveLand_result/t_plot/gma-miR396e_TRINITY_DN8746_c0_g1_i18_1640_TPlot.pdf	0	0	NA	NA	NA	582.939	0	Inf	up	0	0
gma-miR396e	TRINITY_DN8746_c0_g1_i19	TRINITY_DN8746_c0_g1	NA	NA	GO:0006351|transcription, DNA-templated;GO:0006355|regulation of transcription, DNA-templated;GO:0032502|developmental process;GO:0005634|nucleus;GO:0005524|ATP binding	NA	613	635	625	0.80163	3	ACCGUUCAAGAAAGCCUGUGGAA&UUCCACAG-CUUUCUUGAACUGU	13	842.023	0	0.00209654	Output/long789/cleaveLand_result/t_plot/gma-miR396e_TRINITY_DN8746_c0_g1_i19_625_TPlot.pdf	0	0	NA	NA	NA	842.023	0	Inf	up	0	0
gma-miR396e	TRINITY_DN8746_c0_g1_i3	TRINITY_DN8746_c0_g1	NA	NA	GO:0006351|transcription, DNA-templated;GO:0006355|regulation of transcription, DNA-templated;GO:0032502|developmental process;GO:0005634|nucleus;GO:0005524|ATP binding	NA	457	479	469	0.788043	5	AUCGUUCAAGAAAGCCUGUGGAA&UUCCACAG-CUUUCUUGAACUGU	17	1101.11	0	0.00371359	Output/long789/cleaveLand_result/t_plot/gma-miR396e_TRINITY_DN8746_c0_g1_i3_469_TPlot.pdf	21	798.509	3	0.0243924	Output/short456/cleaveLand_result/t_plot/gma-miR396e_TRINITY_DN8746_c0_g1_i3_469_TPlot.pdf	1101.11	798.509	0.463574	up	3.7558e-12	4.5759e-12
gma-miR396e	TRINITY_DN8746_c0_g1_i7	TRINITY_DN8746_c0_g1	NA	NA	GO:0006351|transcription, DNA-templated;GO:0006355|regulation of transcription, DNA-templated;GO:0032502|developmental process;GO:0005634|nucleus;GO:0005524|ATP binding	NA	1711	1733	1723	0.80163	3	ACCGUUCAAGAAAGCCUGUGGAA&UUCCACAG-CUUUCUUGAACUGU	9	582.939	3	0.0138218	Output/long789/cleaveLand_result/t_plot/gma-miR396e_TRINITY_DN8746_c0_g1_i7_1723_TPlot.pdf	0	0	NA	NA	NA	582.939	0	Inf	up	0	0
gma-miR396h	TRINITY_DN15036_c0_g1_i21	TRINITY_DN15036_c0_g1	NA	NA	NA	NA	218	238	229	0.695015	7	CAGUUCACUUAGAGUUGUGGA&UCCACAGCUUU-CUUGAACUG	6	388.626	0	0.0550003	Output/long789/cleaveLand_result/t_plot/gma-miR396h_TRINITY_DN15036_c0_g1_i21_229_TPlot.pdf	0	0	NA	NA	NA	388.626	0	Inf	up	1.5868e-86	7.5422e-86
gma-miR396h	TRINITY_DN15036_c0_g1_i25	TRINITY_DN15036_c0_g1	NA	NA	NA	NA	218	238	229	0.695015	7	CAGUUCACUUAGAGUUGUGGA&UCCACAGCUUU-CUUGAACUG	7	453.397	2	0.183159	Output/long789/cleaveLand_result/t_plot/gma-miR396h_TRINITY_DN15036_c0_g1_i25_229_TPlot.pdf	0	0	NA	NA	NA	453.397	0	Inf	up	0	0
gma-miR396h	TRINITY_DN15036_c0_g1_i6	TRINITY_DN15036_c0_g1	NA	NA	NA	NA	218	238	229	0.695015	7	CAGUUCACUUAGAGUUGUGGA&UCCACAGCUUU-CUUGAACUG	3	194.313	0	0.0554509	Output/long789/cleaveLand_result/t_plot/gma-miR396h_TRINITY_DN15036_c0_g1_i6_229_TPlot.pdf	0	0	NA	NA	NA	194.313	0	Inf	up	3.6042e-44	8.09893e-44
gma-miR396h	TRINITY_DN2142_c0_g1_i17	TRINITY_DN2142_c0_g1	NA	NA	GO:0006457|protein folding;GO:0005737|cytoplasm;GO:0005524|ATP binding;GO:0051082|unfolded protein binding	ko04141;ko04626	1505	1524	1515	0.809384	4	GAGAGCAAGAAGGCUGUGGA&UCCACAGCUUUCUUGAACUG	121	7837.3	2	0.0163443	Output/long789/cleaveLand_result/t_plot/gma-miR396h_TRINITY_DN2142_c0_g1_i17_1515_TPlot.pdf	354	13460.6	2	0.0181253	Output/short456/cleaveLand_result/t_plot/gma-miR396h_TRINITY_DN2142_c0_g1_i17_1515_TPlot.pdf	7837.3	13460.6	-0.780314	down	0	0
gma-miR396h	TRINITY_DN2142_c0_g1_i20	TRINITY_DN2142_c0_g1	NA	NA	GO:0006457|protein folding;GO:0034605|cellular response to heat;GO:0050821|protein stabilization;GO:0005737|cytoplasm;GO:0005829|cytosol;GO:0005886|plasma membrane;GO:0009986|cell surface;GO:0032991|protein-containing complex;GO:0048471|perinuclear region of cytoplasm;GO:0005524|ATP binding;GO:0051082|unfolded protein binding	ko04141;ko04626	761	780	771	0.809384	4	GAGAGCAAGAAGGCUGUGGA&UCCACAGCUUUCUUGAACUG	116	7513.44	2	0.0173785	Output/long789/cleaveLand_result/t_plot/gma-miR396h_TRINITY_DN2142_c0_g1_i20_771_TPlot.pdf	326	12395.9	2	0.0192711	Output/short456/cleaveLand_result/t_plot/gma-miR396h_TRINITY_DN2142_c0_g1_i20_771_TPlot.pdf	7513.44	12395.9	-0.722319	down	0	0
gma-miR396h	TRINITY_DN2142_c0_g1_i7	TRINITY_DN2142_c0_g1	NA	NA	GO:0006457|protein folding;GO:0005737|cytoplasm;GO:0005524|ATP binding;GO:0051082|unfolded protein binding	ko04141;ko04626	2088	2107	2098	0.809384	4	GAGAGCAAGAAGGCUGUGGA&UCCACAGCUUUCUUGAACUG	128	8290.69	2	0.0159994	Output/long789/cleaveLand_result/t_plot/gma-miR396h_TRINITY_DN2142_c0_g1_i7_2098_TPlot.pdf	388	14753.4	2	0.0177431	Output/short456/cleaveLand_result/t_plot/gma-miR396h_TRINITY_DN2142_c0_g1_i7_2098_TPlot.pdf	8290.69	14753.4	-0.831484	down	0	0
gma-miR396h	TRINITY_DN2846_c1_g1_i12	TRINITY_DN2846_c1_g1	NA	NA	NA	NA	1519	1538	1529	0.653959	7	UCUAAGCAGAAAGCUGUGGA&UCCACAGCUUUCUUGAACUG	0	0	NA	NA	NA	2	76.0485	3	0.584753	Output/short456/cleaveLand_result/t_plot/gma-miR396h_TRINITY_DN2846_c1_g1_i12_1529_TPlot.pdf	0	76.0485	-Inf	down	2.7637e-18	4.06116e-18
gma-miR396h	TRINITY_DN2846_c1_g1_i2	TRINITY_DN2846_c1_g1	NA	NA	NA	NA	1901	1920	1911	0.653959	7	UCUAAGCAGAAAGCUGUGGA&UCCACAGCUUUCUUGAACUG	0	0	NA	NA	NA	1	38.0243	4	0.422538	Output/short456/cleaveLand_result/t_plot/gma-miR396h_TRINITY_DN2846_c1_g1_i2_1911_TPlot.pdf	0	38.0243	-Inf	down	6.9845e-10	7.47646e-10
gma-miR396h	TRINITY_DN2846_c1_g1_i29	TRINITY_DN2846_c1_g1	NA	NA	NA	NA	3478	3497	3488	0.653959	7	UCUAAGCAGAAAGCUGUGGA&UCCACAGCUUUCUUGAACUG	0	0	NA	NA	NA	1	38.0243	4	0.421161	Output/short456/cleaveLand_result/t_plot/gma-miR396h_TRINITY_DN2846_c1_g1_i29_3488_TPlot.pdf	0	38.0243	-Inf	down	6.9845e-10	7.47646e-10
gma-miR396h	TRINITY_DN2846_c1_g1_i32	TRINITY_DN2846_c1_g1	NA	NA	NA	NA	3456	3475	3466	0.653959	7	UCUAAGCAGAAAGCUGUGGA&UCCACAGCUUUCUUGAACUG	0	0	NA	NA	NA	1	38.0243	4	0.428464	Output/short456/cleaveLand_result/t_plot/gma-miR396h_TRINITY_DN2846_c1_g1_i32_3466_TPlot.pdf	0	38.0243	-Inf	down	6.9845e-10	7.47646e-10
gma-miR396h	TRINITY_DN2846_c1_g1_i4	TRINITY_DN2846_c1_g1	NA	NA	NA	NA	3478	3497	3488	0.653959	7	UCUAAGCAGAAAGCUGUGGA&UCCACAGCUUUCUUGAACUG	0	0	NA	NA	NA	1	38.0243	4	0.42937	Output/short456/cleaveLand_result/t_plot/gma-miR396h_TRINITY_DN2846_c1_g1_i4_3488_TPlot.pdf	0	38.0243	-Inf	down	6.9845e-10	7.47646e-10
gma-miR396h	TRINITY_DN2846_c1_g1_i6	TRINITY_DN2846_c1_g1	NA	NA	NA	NA	1901	1920	1911	0.653959	7	UCUAAGCAGAAAGCUGUGGA&UCCACAGCUUUCUUGAACUG	0	0	NA	NA	NA	1	38.0243	4	0.428237	Output/short456/cleaveLand_result/t_plot/gma-miR396h_TRINITY_DN2846_c1_g1_i6_1911_TPlot.pdf	0	38.0243	-Inf	down	6.9845e-10	7.47646e-10
gma-miR5375	TRINITY_DN1874_c0_g2_i1	TRINITY_DN1874_c0_g2	NA	NA	GO:0006397|mRNA processing;GO:0008380|RNA splicing;GO:0010228|vegetative to reproductive phase transition of meristem;GO:0051028|mRNA transport;GO:1901000|regulation of response to salt stress;GO:2000070|regulation of response to water deprivation;GO:0005634|nucleus;GO:0005681|spliceosomal complex;GO:0005829|cytosol;GO:0003729|mRNA binding	ko03040	1108	1127	1119	0.669355	7	GCUCUGCGGGU--UUCUAUGGU&ACUAUAGAAGUACUUGUGGAGC	0	0	NA	NA	NA	4	152.097	3	0.101484	Output/short456/cleaveLand_result/t_plot/gma-miR5375_TRINITY_DN1874_c0_g2_i1_1119_TPlot.pdf	0	152.097	-Inf	down	5.9991e-35	1.17839e-34
gma-miR5375	TRINITY_DN1874_c0_g2_i3	TRINITY_DN1874_c0_g2	NA	NA	GO:0006397|mRNA processing;GO:0008380|RNA splicing;GO:0010228|vegetative to reproductive phase transition of meristem;GO:0051028|mRNA transport;GO:1901000|regulation of response to salt stress;GO:2000070|regulation of response to water deprivation;GO:0005634|nucleus;GO:0005681|spliceosomal complex;GO:0005829|cytosol;GO:0003729|mRNA binding	ko03040	1002	1021	1013	0.669355	7	GCUCUGCGGGU--UUCUAUGGU&ACUAUAGAAGUACUUGUGGAGC	0	0	NA	NA	NA	9	342.218	2	0.0654759	Output/short456/cleaveLand_result/t_plot/gma-miR5375_TRINITY_DN1874_c0_g2_i3_1013_TPlot.pdf	0	342.218	-Inf	down	2.0371e-76	8.65019e-76
gma-miR5375	TRINITY_DN1874_c0_g2_i4	TRINITY_DN1874_c0_g2	NA	NA	GO:0006397|mRNA processing;GO:0008380|RNA splicing;GO:0010228|vegetative to reproductive phase transition of meristem;GO:0051028|mRNA transport;GO:1901000|regulation of response to salt stress;GO:2000070|regulation of response to water deprivation;GO:0005634|nucleus;GO:0005681|spliceosomal complex;GO:0005829|cytosol;GO:0003729|mRNA binding	ko03040	1231	1250	1242	0.669355	7	GCUCUGCGGGU--UUCUAUGGU&ACUAUAGAAGUACUUGUGGAGC	0	0	NA	NA	NA	4	152.097	3	0.100915	Output/short456/cleaveLand_result/t_plot/gma-miR5375_TRINITY_DN1874_c0_g2_i4_1242_TPlot.pdf	0	152.097	-Inf	down	5.9991e-35	1.17839e-34
gma-miR5375	TRINITY_DN1874_c0_g2_i6	TRINITY_DN1874_c0_g2	NA	NA	GO:0006397|mRNA processing;GO:0008380|RNA splicing;GO:0010228|vegetative to reproductive phase transition of meristem;GO:0051028|mRNA transport;GO:1901000|regulation of response to salt stress;GO:2000070|regulation of response to water deprivation;GO:0005634|nucleus;GO:0005681|spliceosomal complex;GO:0005829|cytosol;GO:0003729|mRNA binding	ko03040	1337	1356	1348	0.669355	7	GCUCUGCGGGU--UUCUAUGGU&ACUAUAGAAGUACUUGUGGAGC	0	0	NA	NA	NA	10	380.243	2	0.0647482	Output/short456/cleaveLand_result/t_plot/gma-miR5375_TRINITY_DN1874_c0_g2_i6_1348_TPlot.pdf	0	380.243	-Inf	down	1.0627e-84	4.7946e-84
gra-miR166d	TRINITY_DN4349_c2_g1_i7	TRINITY_DN4349_c2_g1	NA	NA	NA	NA	866	885	876	0.692737	6	AGUC-AACGACAUUCCCGUAG&UGAUGGGAAUGUUGUUUGGCU	14	906.794	0	0.0778873	Output/long789/cleaveLand_result/t_plot/gra-miR166d_TRINITY_DN4349_c2_g1_i7_876_TPlot.pdf	0	0	NA	NA	NA	906.794	0	Inf	up	0	0
gra-miR166d	TRINITY_DN4998_c0_g1_i13	TRINITY_DN4998_c0_g1	NA	NA	GO:0000302|response to reactive oxygen species;GO:0006457|protein folding;GO:0009408|response to heat;GO:0009651|response to salt stress;GO:0042542|response to hydrogen peroxide;GO:0051259|protein complex oligomerization;GO:0071456|cellular response to hypoxia;GO:0005737|cytoplasm;GO:0043621|protein self-association;GO:0051082|unfolded protein binding	ko04141	238	260	251	0.698324	6.5	AUCCAAGGCCAACAUUCCCGUCG&UGAUGGGAAUGUUG--UUUGGCU	1	64.771	4	0.222421	Output/long789/cleaveLand_result/t_plot/gra-miR166d_TRINITY_DN4998_c0_g1_i13_251_TPlot.pdf	0	0	NA	NA	NA	64.771	0	Inf	up	8.4037e-16	1.0516e-15
gra-miR166d	TRINITY_DN4998_c0_g1_i17	TRINITY_DN4998_c0_g1	NA	NA	GO:0000302|response to reactive oxygen species;GO:0006457|protein folding;GO:0009408|response to heat;GO:0009651|response to salt stress;GO:0042542|response to hydrogen peroxide;GO:0051259|protein complex oligomerization;GO:0071456|cellular response to hypoxia;GO:0005737|cytoplasm;GO:0043621|protein self-association;GO:0051082|unfolded protein binding	ko04141	238	260	251	0.698324	6.5	AUCCAAGGCCAACAUUCCCGUCG&UGAUGGGAAUGUUG--UUUGGCU	2	129.542	3	0.365976	Output/long789/cleaveLand_result/t_plot/gra-miR166d_TRINITY_DN4998_c0_g1_i17_251_TPlot.pdf	0	0	NA	NA	NA	129.542	0	Inf	up	5.1393e-30	9.14621e-30
gra-miR166d	TRINITY_DN4998_c0_g1_i19	TRINITY_DN4998_c0_g1	NA	NA	GO:0000302|response to reactive oxygen species;GO:0006457|protein folding;GO:0009408|response to heat;GO:0009651|response to salt stress;GO:0042542|response to hydrogen peroxide;GO:0051259|protein complex oligomerization;GO:0071456|cellular response to hypoxia;GO:0005737|cytoplasm;GO:0043621|protein self-association;GO:0051082|unfolded protein binding	ko04141	238	260	251	0.698324	6.5	AUCCAAGGCCAACAUUCCCGUCG&UGAUGGGAAUGUUG--UUUGGCU	2	129.542	3	0.367892	Output/long789/cleaveLand_result/t_plot/gra-miR166d_TRINITY_DN4998_c0_g1_i19_251_TPlot.pdf	0	0	NA	NA	NA	129.542	0	Inf	up	5.1393e-30	9.14621e-30
gra-miR166d	TRINITY_DN4998_c0_g1_i23	TRINITY_DN4998_c0_g1	NA	NA	GO:0000302|response to reactive oxygen species;GO:0006457|protein folding;GO:0009408|response to heat;GO:0009651|response to salt stress;GO:0042542|response to hydrogen peroxide;GO:0051259|protein complex oligomerization;GO:0071456|cellular response to hypoxia;GO:0005737|cytoplasm;GO:0043621|protein self-association;GO:0051082|unfolded protein binding	ko04141	238	260	251	0.698324	6.5	AUCCAAGGCCAACAUUCCCGUCG&UGAUGGGAAUGUUG--UUUGGCU	2	129.542	3	0.370564	Output/long789/cleaveLand_result/t_plot/gra-miR166d_TRINITY_DN4998_c0_g1_i23_251_TPlot.pdf	0	0	NA	NA	NA	129.542	0	Inf	up	5.1393e-30	9.14621e-30
gra-miR166d	TRINITY_DN4998_c0_g1_i26	TRINITY_DN4998_c0_g1	NA	NA	GO:0000302|response to reactive oxygen species;GO:0006457|protein folding;GO:0009408|response to heat;GO:0009651|response to salt stress;GO:0042542|response to hydrogen peroxide;GO:0051259|protein complex oligomerization;GO:0071456|cellular response to hypoxia;GO:0005737|cytoplasm;GO:0043621|protein self-association;GO:0051082|unfolded protein binding	ko04141	238	260	251	0.698324	6.5	AUCCAAGGCCAACAUUCCCGUCG&UGAUGGGAAUGUUG--UUUGGCU	1	64.771	4	0.220903	Output/long789/cleaveLand_result/t_plot/gra-miR166d_TRINITY_DN4998_c0_g1_i26_251_TPlot.pdf	0	0	NA	NA	NA	64.771	0	Inf	up	8.4037e-16	1.0516e-15
gra-miR166d	TRINITY_DN4998_c0_g1_i7	TRINITY_DN4998_c0_g1	NA	NA	GO:0000302|response to reactive oxygen species;GO:0006457|protein folding;GO:0009408|response to heat;GO:0009651|response to salt stress;GO:0042542|response to hydrogen peroxide;GO:0051259|protein complex oligomerization;GO:0071456|cellular response to hypoxia;GO:0005737|cytoplasm;GO:0043621|protein self-association;GO:0051082|unfolded protein binding	ko04141	238	260	251	0.698324	6.5	AUCCAAGGCCAACAUUCCCGUCG&UGAUGGGAAUGUUG--UUUGGCU	1	64.771	4	0.217604	Output/long789/cleaveLand_result/t_plot/gra-miR166d_TRINITY_DN4998_c0_g1_i7_251_TPlot.pdf	1	38.0243	4	0.25885	Output/short456/cleaveLand_result/t_plot/gra-miR166d_TRINITY_DN4998_c0_g1_i7_251_TPlot.pdf	64.771	38.0243	0.768429	up	0.0083365	0.00847593
har-miR156c	TRINITY_DN12296_c1_g1_i2	TRINITY_DN12296_c1_g1	NA	NA	NA	NA	143	162	152	0.654891	5.5	UGCUCUCUCUCUCUCUCUCU&UGACAGA-AGAGAGGGAGCA	0	0	NA	NA	NA	1	38.0243	4	0.78137	Output/short456/cleaveLand_result/t_plot/har-miR156c_TRINITY_DN12296_c1_g1_i2_152_TPlot.pdf	0	38.0243	-Inf	down	6.9845e-10	7.47646e-10
har-miR156c	TRINITY_DN16011_c0_g1_i12	TRINITY_DN16011_c0_g1	NA	NA	NA	NA	773	795	785	0.67663	7	UGCUUCACCCUCUCUUUCUGUUU&UGACAGAA-GAGAGGG---AGCA	0	0	NA	NA	NA	1	38.0243	4	0.588662	Output/short456/cleaveLand_result/t_plot/har-miR156c_TRINITY_DN16011_c0_g1_i12_785_TPlot.pdf	0	38.0243	-Inf	down	6.9845e-10	7.47646e-10
har-miR156c	TRINITY_DN17771_c0_g1_i1	TRINITY_DN17771_c0_g1	NA	NA	NA	NA	14	32	23	0.956522	0.5	UGCUCUCUCUCUUCUGUCA&UGACAGAAGAGAGGGAGCA	3	194.313	3	0.00543144	Output/long789/cleaveLand_result/t_plot/har-miR156c_TRINITY_DN17771_c0_g1_i1_23_TPlot.pdf	0	0	NA	NA	NA	194.313	0	Inf	up	3.6042e-44	8.09893e-44
har-miR156c	TRINITY_DN6217_c0_g1_i3	TRINITY_DN6217_c0_g1	NA	NA	NA	NA	275	293	284	0.817935	3.5	UGCUCUCUCUCCUCUGUCG&UGACAGAAGAGAGGGAGCA	4	259.084	3	0.0432136	Output/long789/cleaveLand_result/t_plot/har-miR156c_TRINITY_DN6217_c0_g1_i3_284_TPlot.pdf	1	38.0243	4	0.0285479	Output/short456/cleaveLand_result/t_plot/har-miR156c_TRINITY_DN6217_c0_g1_i3_284_TPlot.pdf	259.084	38.0243	2.76843	up	1.1756e-37	2.42901e-37
har-miR156c	TRINITY_DN6217_c0_g1_i7	TRINITY_DN6217_c0_g1	NA	NA	NA	NA	275	293	284	0.817935	3.5	UGCUCUCUCUCCUCUGUCG&UGACAGAAGAGAGGGAGCA	1	64.771	4	0.0231302	Output/long789/cleaveLand_result/t_plot/har-miR156c_TRINITY_DN6217_c0_g1_i7_284_TPlot.pdf	1	38.0243	4	0.0281623	Output/short456/cleaveLand_result/t_plot/har-miR156c_TRINITY_DN6217_c0_g1_i7_284_TPlot.pdf	64.771	38.0243	0.768429	up	0.0083365	0.00847593
har-miR156c	TRINITY_DN6217_c0_g1_i8	TRINITY_DN6217_c0_g1	NA	NA	NA	NA	275	293	284	0.817935	3.5	UGCUCUCUCUCCUCUGUCG&UGACAGAAGAGAGGGAGCA	3	194.313	3	0.0501363	Output/long789/cleaveLand_result/t_plot/har-miR156c_TRINITY_DN6217_c0_g1_i8_284_TPlot.pdf	1	38.0243	4	0.033162	Output/short456/cleaveLand_result/t_plot/har-miR156c_TRINITY_DN6217_c0_g1_i8_284_TPlot.pdf	194.313	38.0243	2.35339	up	1.1354e-24	1.84702e-24
har-miR156c	TRINITY_DN9504_c0_g1_i1	TRINITY_DN9504_c0_g1	NA	NA	GO:0005886|plasma membrane;GO:0016021|integral component of membrane;GO:0005524|ATP binding;GO:0106310|protein serine kinase activity;GO:0106311|protein threonine kinase activity	NA	1948	1966	1957	0.956522	0.5	UGCUCUCUCUCUUCUGUCA&UGACAGAAGAGAGGGAGCA	1	64.771	4	0.000974604	Output/long789/cleaveLand_result/t_plot/har-miR156c_TRINITY_DN9504_c0_g1_i1_1957_TPlot.pdf	0	0	NA	NA	NA	64.771	0	Inf	up	8.4037e-16	1.0516e-15
har-miR156c	TRINITY_DN9504_c0_g1_i11	TRINITY_DN9504_c0_g1	NA	NA	GO:0005886|plasma membrane;GO:0016021|integral component of membrane;GO:0005524|ATP binding;GO:0106310|protein serine kinase activity;GO:0106311|protein threonine kinase activity	NA	1731	1749	1740	0.956522	0.5	UGCUCUCUCUCUUCUGUCA&UGACAGAAGAGAGGGAGCA	3	194.313	3	0.00241763	Output/long789/cleaveLand_result/t_plot/har-miR156c_TRINITY_DN9504_c0_g1_i11_1740_TPlot.pdf	0	0	NA	NA	NA	194.313	0	Inf	up	3.6042e-44	8.09893e-44
har-miR156c	TRINITY_DN9504_c0_g1_i6	TRINITY_DN9504_c0_g1	NA	NA	GO:0005886|plasma membrane;GO:0016021|integral component of membrane;GO:0005524|ATP binding;GO:0106310|protein serine kinase activity;GO:0106311|protein threonine kinase activity	NA	815	833	824	0.956522	0.5	UGCUCUCUCUCUUCUGUCA&UGACAGAAGAGAGGGAGCA	3	194.313	3	0.00302112	Output/long789/cleaveLand_result/t_plot/har-miR156c_TRINITY_DN9504_c0_g1_i6_824_TPlot.pdf	0	0	NA	NA	NA	194.313	0	Inf	up	3.6042e-44	8.09893e-44
hbr-miR156	TRINITY_DN4207_c0_g1_i1	TRINITY_DN4207_c0_g1	NA	NA	NA	ko00020;ko00190;ko01100;ko01110;ko01200	702	720	711	0.6625	5.5	CCUUUCUAUCUGCUGUCGC&UUGACAGAAGAUAGAGAGC	1	64.771	4	0.398898	Output/long789/cleaveLand_result/t_plot/hbr-miR156_TRINITY_DN4207_c0_g1_i1_711_TPlot.pdf	1	38.0243	4	0.462766	Output/short456/cleaveLand_result/t_plot/hbr-miR156_TRINITY_DN4207_c0_g1_i1_711_TPlot.pdf	64.771	38.0243	0.768429	up	0.0083365	0.00847593
hbr-miR156	TRINITY_DN4207_c0_g1_i11	TRINITY_DN4207_c0_g1	NA	NA	NA	ko00020;ko00190;ko01100;ko01110;ko01200	682	700	691	0.6625	5.5	CCUUUCUAUCUGCUGUCGC&UUGACAGAAGAUAGAGAGC	2	129.542	3	0.627525	Output/long789/cleaveLand_result/t_plot/hbr-miR156_TRINITY_DN4207_c0_g1_i11_691_TPlot.pdf	1	38.0243	4	0.476651	Output/short456/cleaveLand_result/t_plot/hbr-miR156_TRINITY_DN4207_c0_g1_i11_691_TPlot.pdf	129.542	38.0243	1.76843	up	1.5473e-12	1.90526e-12
hbr-miR156	TRINITY_DN4207_c0_g1_i16	TRINITY_DN4207_c0_g1	NA	NA	NA	ko00020;ko00190;ko01100;ko01110;ko01200	522	540	531	0.6625	5.5	CCUUUCUAUCUGCUGUCGC&UUGACAGAAGAUAGAGAGC	0	0	NA	NA	NA	3	114.073	2	0.454236	Output/short456/cleaveLand_result/t_plot/hbr-miR156_TRINITY_DN4207_c0_g1_i16_531_TPlot.pdf	0	114.073	-Inf	down	1.252e-26	2.10489e-26
hbr-miR156	TRINITY_DN4207_c0_g1_i17	TRINITY_DN4207_c0_g1	NA	NA	NA	ko00020;ko00190;ko01100;ko01110;ko01200	522	540	531	0.6625	5.5	CCUUUCUAUCUGCUGUCGC&UUGACAGAAGAUAGAGAGC	1	64.771	4	0.404538	Output/long789/cleaveLand_result/t_plot/hbr-miR156_TRINITY_DN4207_c0_g1_i17_531_TPlot.pdf	2	76.0485	3	0.635764	Output/short456/cleaveLand_result/t_plot/hbr-miR156_TRINITY_DN4207_c0_g1_i17_531_TPlot.pdf	64.771	76.0485	-0.231571	down	0.34192	0.343705
hbr-miR156	TRINITY_DN4207_c0_g1_i18	TRINITY_DN4207_c0_g1	NA	NA	NA	ko00020;ko00190;ko01100;ko01110;ko01200	679	697	688	0.6625	5.5	CCUUUCUAUCUGCUGUCGC&UUGACAGAAGAUAGAGAGC	0	0	NA	NA	NA	3	114.073	3	0.622138	Output/short456/cleaveLand_result/t_plot/hbr-miR156_TRINITY_DN4207_c0_g1_i18_688_TPlot.pdf	0	114.073	-Inf	down	1.252e-26	2.10489e-26
hbr-miR156	TRINITY_DN4207_c0_g1_i23	TRINITY_DN4207_c0_g1	NA	NA	NA	ko00020;ko00190;ko01100;ko01110;ko01200	679	697	688	0.6625	5.5	CCUUUCUAUCUGCUGUCGC&UUGACAGAAGAUAGAGAGC	4	259.084	0	0.140328	Output/long789/cleaveLand_result/t_plot/hbr-miR156_TRINITY_DN4207_c0_g1_i23_688_TPlot.pdf	3	114.073	3	0.63345	Output/short456/cleaveLand_result/t_plot/hbr-miR156_TRINITY_DN4207_c0_g1_i23_688_TPlot.pdf	259.084	114.073	1.18347	up	6.0256e-14	7.49953e-14
hbr-miR156	TRINITY_DN4207_c0_g1_i4	TRINITY_DN4207_c0_g1	NA	NA	NA	ko00020;ko00190;ko01100;ko01110;ko01200	682	700	691	0.6625	5.5	CCUUUCUAUCUGCUGUCGC&UUGACAGAAGAUAGAGAGC	1	64.771	4	0.399679	Output/long789/cleaveLand_result/t_plot/hbr-miR156_TRINITY_DN4207_c0_g1_i4_691_TPlot.pdf	2	76.0485	3	0.629952	Output/short456/cleaveLand_result/t_plot/hbr-miR156_TRINITY_DN4207_c0_g1_i4_691_TPlot.pdf	64.771	76.0485	-0.231571	down	0.34192	0.343705
hbr-miR156	TRINITY_DN4207_c0_g1_i5	TRINITY_DN4207_c0_g1	NA	NA	NA	ko00020;ko00190;ko01100;ko01110;ko01200	702	720	711	0.6625	5.5	CCUUUCUAUCUGCUGUCGC&UUGACAGAAGAUAGAGAGC	0	0	NA	NA	NA	4	152.097	2	0.46704	Output/short456/cleaveLand_result/t_plot/hbr-miR156_TRINITY_DN4207_c0_g1_i5_711_TPlot.pdf	0	152.097	-Inf	down	5.9991e-35	1.17839e-34
hbr-miR156	TRINITY_DN4207_c0_g1_i8	TRINITY_DN4207_c0_g1	NA	NA	NA	ko00020;ko00190;ko01100;ko01110;ko01200	522	540	531	0.6625	5.5	CCUUUCUAUCUGCUGUCGC&UUGACAGAAGAUAGAGAGC	0	0	NA	NA	NA	2	76.0485	3	0.628544	Output/short456/cleaveLand_result/t_plot/hbr-miR156_TRINITY_DN4207_c0_g1_i8_531_TPlot.pdf	0	76.0485	-Inf	down	2.7637e-18	4.06116e-18
hbr-miR156	TRINITY_DN5374_c0_g1_i9	TRINITY_DN5374_c0_g1	NA	NA	GO:0006952|defense response;GO:0010200|response to chitin;GO:0005634|nucleus;GO:0000976|transcription regulatory region sequence-specific DNA binding;GO:0003700|DNA-binding transcription factor activity;GO:0043565|sequence-specific DNA binding	NA	249	266	257	0.6625	5.5	GCUCUUC-UCUUCUGUUAC&UUGACAGAAGAUAGAGAGC	0	0	NA	NA	NA	1	38.0243	4	0.457841	Output/short456/cleaveLand_result/t_plot/hbr-miR156_TRINITY_DN5374_c0_g1_i9_257_TPlot.pdf	0	38.0243	-Inf	down	6.9845e-10	7.47646e-10
hbr-miR396a	TRINITY_DN11856_c0_g1_i2	TRINITY_DN11856_c0_g1	NA	NA	GO:0016042|lipid catabolic process;GO:0009507|chloroplast;GO:0004620|phospholipase activity;GO:0004806|triglyceride lipase activity;GO:0008970|phospholipase A1 activity;GO:0047714|galactolipase activity	NA	1071	1092	1082	0.717791	6.5	UUGAAGUUCAAGGAACGUUGUG&CACAGC-UUUCUUGAACUUUCU	22	1424.96	2	0.131468	Output/long789/cleaveLand_result/t_plot/hbr-miR396a_TRINITY_DN11856_c0_g1_i2_1082_TPlot.pdf	0	0	NA	NA	NA	1424.96	0	Inf	up	0	0
hbr-miR396a	TRINITY_DN16252_c0_g1_i1	TRINITY_DN16252_c0_g1	NA	NA	GO:0015031|protein transport;GO:0005886|plasma membrane;GO:0016021|integral component of membrane	NA	778	799	790	0.736196	5.5	AGAUGAGUUCAAGAAAGUUGCU&CACAGCUUUCUUGAACUU-UCU	25	1619.28	0	0.0258932	Output/long789/cleaveLand_result/t_plot/hbr-miR396a_TRINITY_DN16252_c0_g1_i1_790_TPlot.pdf	0	0	NA	NA	NA	1619.28	0	Inf	up	0	0
hbr-miR396a	TRINITY_DN2142_c0_g1_i14	TRINITY_DN2142_c0_g1	NA	NA	GO:0006457|protein folding;GO:0034605|cellular response to heat;GO:0050821|protein stabilization;GO:0005737|cytoplasm;GO:0005829|cytosol;GO:0005886|plasma membrane;GO:0009986|cell surface;GO:0032991|protein-containing complex;GO:0048471|perinuclear region of cytoplasm;GO:0005524|ATP binding;GO:0051082|unfolded protein binding	ko04141;ko04626	760	778	769	0.671779	5.5	UGAGAG--CAAGAAGGCUGUA&CACAGCUUUCUUGAACUUUCU	63	4080.58	2	0.286056	Output/long789/cleaveLand_result/t_plot/hbr-miR396a_TRINITY_DN2142_c0_g1_i14_769_TPlot.pdf	23	874.558	2	0.312027	Output/short456/cleaveLand_result/t_plot/hbr-miR396a_TRINITY_DN2142_c0_g1_i14_769_TPlot.pdf	4080.58	874.558	2.22215	up	0	0
hbr-miR396a	TRINITY_DN2142_c0_g1_i17	TRINITY_DN2142_c0_g1	NA	NA	GO:0006457|protein folding;GO:0005737|cytoplasm;GO:0005524|ATP binding;GO:0051082|unfolded protein binding	ko04141;ko04626	1504	1522	1513	0.776074	4.5	CGAGAG--CAAGAAGGCUGUG&CACAGCUUUCUUGAACUUUCU	278	18006.3	2	0.0398565	Output/long789/cleaveLand_result/t_plot/hbr-miR396a_TRINITY_DN2142_c0_g1_i17_1513_TPlot.pdf	387	14715.4	2	0.0441414	Output/short456/cleaveLand_result/t_plot/hbr-miR396a_TRINITY_DN2142_c0_g1_i17_1513_TPlot.pdf	18006.3	14715.4	0.29118	up	3.7084e-75	1.56894e-74
hbr-miR396a	TRINITY_DN2142_c0_g1_i18	TRINITY_DN2142_c0_g1	NA	NA	GO:0006457|protein folding;GO:0005737|cytoplasm;GO:0005524|ATP binding;GO:0051082|unfolded protein binding	ko04141;ko04626	2013	2033	2024	0.754601	4.5	GGGGAGAGCAAGAAAGCUGUU&CACAGCUUUCUUGAACUUUCU	19	1230.65	2	0.0654317	Output/long789/cleaveLand_result/t_plot/hbr-miR396a_TRINITY_DN2142_c0_g1_i18_2024_TPlot.pdf	5	190.121	3	0.115035	Output/short456/cleaveLand_result/t_plot/hbr-miR396a_TRINITY_DN2142_c0_g1_i18_2024_TPlot.pdf	1230.65	190.121	2.69443	up	0	0
hbr-miR396a	TRINITY_DN2142_c0_g1_i2	TRINITY_DN2142_c0_g1	NA	NA	GO:0006457|protein folding;GO:0005737|cytoplasm;GO:0005524|ATP binding;GO:0051082|unfolded protein binding	ko04141;ko04626	1624	1644	1635	0.754601	4.5	GGGGAGAGCAAGAAAGCUGUU&CACAGCUUUCUUGAACUUUCU	14	906.794	2	0.0618203	Output/long789/cleaveLand_result/t_plot/hbr-miR396a_TRINITY_DN2142_c0_g1_i2_1635_TPlot.pdf	7	266.17	2	0.068381	Output/short456/cleaveLand_result/t_plot/hbr-miR396a_TRINITY_DN2142_c0_g1_i2_1635_TPlot.pdf	906.794	266.17	1.76843	up	4.0547e-78	1.78747e-77
hbr-miR396a	TRINITY_DN2142_c0_g1_i20	TRINITY_DN2142_c0_g1	NA	NA	GO:0006457|protein folding;GO:0034605|cellular response to heat;GO:0050821|protein stabilization;GO:0005737|cytoplasm;GO:0005829|cytosol;GO:0005886|plasma membrane;GO:0009986|cell surface;GO:0032991|protein-containing complex;GO:0048471|perinuclear region of cytoplasm;GO:0005524|ATP binding;GO:0051082|unfolded protein binding	ko04141;ko04626	760	778	769	0.776074	4.5	CGAGAG--CAAGAAGGCUGUG&CACAGCUUUCUUGAACUUUCU	278	18006.3	2	0.0395197	Output/long789/cleaveLand_result/t_plot/hbr-miR396a_TRINITY_DN2142_c0_g1_i20_769_TPlot.pdf	408	15513.9	2	0.0437693	Output/short456/cleaveLand_result/t_plot/hbr-miR396a_TRINITY_DN2142_c0_g1_i20_769_TPlot.pdf	18006.3	15513.9	0.214944	up	6.7943e-43	1.46955e-42
hbr-miR396a	TRINITY_DN2142_c0_g1_i3	TRINITY_DN2142_c0_g1	NA	NA	GO:0006457|protein folding;GO:0005737|cytoplasm;GO:0005524|ATP binding;GO:0051082|unfolded protein binding	ko04141;ko04626	2025	2045	2036	0.754601	4.5	GGGGAGAGCAAGAAAGCUGUU&CACAGCUUUCUUGAACUUUCU	14	906.794	2	0.0660869	Output/long789/cleaveLand_result/t_plot/hbr-miR396a_TRINITY_DN2142_c0_g1_i3_2036_TPlot.pdf	3	114.073	3	0.116155	Output/short456/cleaveLand_result/t_plot/hbr-miR396a_TRINITY_DN2142_c0_g1_i3_2036_TPlot.pdf	906.794	114.073	2.99082	up	0	0
hbr-miR396a	TRINITY_DN2142_c0_g1_i6	TRINITY_DN2142_c0_g1	NA	NA	GO:0006457|protein folding;GO:0034605|cellular response to heat;GO:0050821|protein stabilization;GO:0061077|chaperone-mediated protein folding;GO:0005737|cytoplasm;GO:0005829|cytosol;GO:0005886|plasma membrane;GO:0009986|cell surface;GO:0032991|protein-containing complex;GO:0048471|perinuclear region of cytoplasm;GO:0005524|ATP binding;GO:0016887|ATPase activity;GO:0051082|unfolded protein binding	ko04141;ko04626	481	499	490	0.671779	5.5	UGAGAG--CAAGAAGGCUGUA&CACAGCUUUCUUGAACUUUCU	59	3821.49	2	0.278506	Output/long789/cleaveLand_result/t_plot/hbr-miR396a_TRINITY_DN2142_c0_g1_i6_490_TPlot.pdf	20	760.485	2	0.303947	Output/short456/cleaveLand_result/t_plot/hbr-miR396a_TRINITY_DN2142_c0_g1_i6_490_TPlot.pdf	3821.49	760.485	2.32914	up	0	0
hbr-miR396a	TRINITY_DN2142_c0_g1_i7	TRINITY_DN2142_c0_g1	NA	NA	GO:0006457|protein folding;GO:0005737|cytoplasm;GO:0005524|ATP binding;GO:0051082|unfolded protein binding	ko04141;ko04626	2087	2105	2096	0.776074	4.5	CGAGAG--CAAGAAGGCUGUG&CACAGCUUUCUUGAACUUUCU	305	19755.2	2	0.0401931	Output/long789/cleaveLand_result/t_plot/hbr-miR396a_TRINITY_DN2142_c0_g1_i7_2096_TPlot.pdf	385	14639.3	2	0.0445133	Output/short456/cleaveLand_result/t_plot/hbr-miR396a_TRINITY_DN2142_c0_g1_i7_2096_TPlot.pdf	19755.2	14639.3	0.432379	up	0	0
hbr-miR396a	TRINITY_DN4987_c1_g1_i13	TRINITY_DN4987_c1_g1	NA	NA	GO:0007188|adenylate cyclase-modulating G protein-coupled receptor signaling pathway;GO:0005634|nucleus;GO:0005834|heterotrimeric G-protein complex;GO:0001664|G protein-coupled receptor binding;GO:0003924|GTPase activity;GO:0005525|GTP binding;GO:0031683|G-protein beta/gamma-subunit complex binding;GO:0046872|metal ion binding	NA	1918	1937	1929	0.690184	5.5	GUGAAGUUCAAG-AAGCUGUA&CACAGCUUUCUUGAACUUUCU	0	0	NA	NA	NA	1	38.0243	4	0.238582	Output/short456/cleaveLand_result/t_plot/hbr-miR396a_TRINITY_DN4987_c1_g1_i13_1929_TPlot.pdf	0	38.0243	-Inf	down	6.9845e-10	7.47646e-10
hbr-miR396a	TRINITY_DN4987_c1_g1_i18	TRINITY_DN4987_c1_g1	NA	NA	GO:0007188|adenylate cyclase-modulating G protein-coupled receptor signaling pathway;GO:0005634|nucleus;GO:0005834|heterotrimeric G-protein complex;GO:0001664|G protein-coupled receptor binding;GO:0003924|GTPase activity;GO:0005525|GTP binding;GO:0031683|G-protein beta/gamma-subunit complex binding;GO:0046872|metal ion binding	NA	1918	1937	1929	0.690184	5.5	GUGAAGUUCAAG-AAGCUGUA&CACAGCUUUCUUGAACUUUCU	0	0	NA	NA	NA	1	38.0243	4	0.232516	Output/short456/cleaveLand_result/t_plot/hbr-miR396a_TRINITY_DN4987_c1_g1_i18_1929_TPlot.pdf	0	38.0243	-Inf	down	6.9845e-10	7.47646e-10
hbr-miR396a	TRINITY_DN4987_c1_g1_i30	TRINITY_DN4987_c1_g1	NA	NA	GO:0007188|adenylate cyclase-modulating G protein-coupled receptor signaling pathway;GO:0005634|nucleus;GO:0005834|heterotrimeric G-protein complex;GO:0001664|G protein-coupled receptor binding;GO:0003924|GTPase activity;GO:0005525|GTP binding;GO:0031683|G-protein beta/gamma-subunit complex binding;GO:0046872|metal ion binding	NA	1918	1937	1929	0.690184	5.5	GUGAAGUUCAAG-AAGCUGUA&CACAGCUUUCUUGAACUUUCU	0	0	NA	NA	NA	1	38.0243	4	0.240091	Output/short456/cleaveLand_result/t_plot/hbr-miR396a_TRINITY_DN4987_c1_g1_i30_1929_TPlot.pdf	0	38.0243	-Inf	down	6.9845e-10	7.47646e-10
hbr-miR396a	TRINITY_DN4987_c1_g1_i32	TRINITY_DN4987_c1_g1	NA	NA	GO:0007188|adenylate cyclase-modulating G protein-coupled receptor signaling pathway;GO:0005634|nucleus;GO:0005834|heterotrimeric G-protein complex;GO:0001664|G protein-coupled receptor binding;GO:0003924|GTPase activity;GO:0005525|GTP binding;GO:0031683|G-protein beta/gamma-subunit complex binding;GO:0046872|metal ion binding	NA	2942	2961	2953	0.690184	5.5	GUGAAGUUCAAG-AAGCUGUA&CACAGCUUUCUUGAACUUUCU	0	0	NA	NA	NA	2	76.0485	2	0.233715	Output/short456/cleaveLand_result/t_plot/hbr-miR396a_TRINITY_DN4987_c1_g1_i32_2953_TPlot.pdf	0	76.0485	-Inf	down	2.7637e-18	4.06116e-18
hbr-miR396a	TRINITY_DN5329_c1_g1_i2	TRINITY_DN5329_c1_g1	NA	NA	GO:0051603|proteolysis involved in cellular protein catabolic process;GO:0005615|extracellular space;GO:0005764|lysosome;GO:0005773|vacuole;GO:0005783|endoplasmic reticulum;GO:0005829|cytosol;GO:0099503|secretory vesicle;GO:0004197|cysteine-type endopeptidase activity	NA	684	704	695	0.656442	6	UCAAAGAUCAAGGAAGCUGCG&CACAGCUUUCUUGAACUUUCU	13	842.023	2	0.36183	Output/long789/cleaveLand_result/t_plot/hbr-miR396a_TRINITY_DN5329_c1_g1_i2_695_TPlot.pdf	0	0	NA	NA	NA	842.023	0	Inf	up	0	0
hbr-miR396a	TRINITY_DN556_c0_g1_i28	TRINITY_DN556_c0_g1	NA	NA	NA	NA	1562	1582	1573	0.788344	4.5	AGGAAGAUCGAGGAAGCUGUU&CACAGCUUUCUUGAACUUUCU	1	64.771	4	0.0250334	Output/long789/cleaveLand_result/t_plot/hbr-miR396a_TRINITY_DN556_c0_g1_i28_1573_TPlot.pdf	0	0	NA	NA	NA	64.771	0	Inf	up	8.4037e-16	1.0516e-15
hbr-miR396a	TRINITY_DN7589_c0_g1_i1	TRINITY_DN7589_c0_g1	NA	NA	GO:0009793|embryo development ending in seed dormancy;GO:0016925|protein sumoylation;GO:0032446|protein modification by small protein conjugation;GO:0005634|nucleus;GO:0005737|cytoplasm;GO:0005829|cytosol;GO:0009506|plasmodesma;GO:0031510|SUMO activating enzyme complex;GO:0005524|ATP binding;GO:0016740|transferase activity;GO:0019948|SUMO activating enzyme activity;GO:0046872|metal ion binding	ko04120	2338	2357	2348	0.653374	4.5	GGAAAGAA-AAGAAAGCUGUC&CACAGCUUUCUUGAACUUUCU	0	0	NA	NA	NA	16	608.388	2	0.401269	Output/short456/cleaveLand_result/t_plot/hbr-miR396a_TRINITY_DN7589_c0_g1_i1_2348_TPlot.pdf	0	608.388	-Inf	down	0	0
hbr-miR396a	TRINITY_DN7589_c0_g1_i2	TRINITY_DN7589_c0_g1	NA	NA	GO:0009793|embryo development ending in seed dormancy;GO:0016925|protein sumoylation;GO:0032446|protein modification by small protein conjugation;GO:0005634|nucleus;GO:0005737|cytoplasm;GO:0005829|cytosol;GO:0009506|plasmodesma;GO:0031510|SUMO activating enzyme complex;GO:0005524|ATP binding;GO:0016740|transferase activity;GO:0019948|SUMO activating enzyme activity;GO:0046872|metal ion binding	ko04120	2036	2055	2046	0.653374	4.5	GGAAAGAA-AAGAAAGCUGUC&CACAGCUUUCUUGAACUUUCU	0	0	NA	NA	NA	19	722.461	0	0.116314	Output/short456/cleaveLand_result/t_plot/hbr-miR396a_TRINITY_DN7589_c0_g1_i2_2046_TPlot.pdf	0	722.461	-Inf	down	0	0
hbr-miR396a	TRINITY_DN8102_c0_g1_i6	TRINITY_DN8102_c0_g1	NA	NA	GO:0002221|pattern recognition receptor signaling pathway;GO:0006952|defense response;GO:0042742|defense response to bacterium;GO:0045087|innate immune response;GO:0046777|protein autophosphorylation;GO:0005886|plasma membrane;GO:0004672|protein kinase activity;GO:0004674|protein serine/threonine kinase activity;GO:0005524|ATP binding;GO:0106310|protein serine kinase activity;GO:0106311|protein t…	ko04626	1550	1570	1561	0.653374	7	AGAAAGUGCAAGGAUGCUGAA&CACAGCUUUCUUGAACUUUCU	1	64.771	4	0.342269	Output/long789/cleaveLand_result/t_plot/hbr-miR396a_TRINITY_DN8102_c0_g1_i6_1561_TPlot.pdf	16	608.388	3	0.557889	Output/short456/cleaveLand_result/t_plot/hbr-miR396a_TRINITY_DN8102_c0_g1_i6_1561_TPlot.pdf	64.771	608.388	-3.23157	down	0	0
hbr-miR396a	TRINITY_DN8340_c0_g2_i1	TRINITY_DN8340_c0_g2	NA	NA	GO:0006457|protein folding;GO:0034605|cellular response to heat;GO:0050821|protein stabilization;GO:0005737|cytoplasm;GO:0005829|cytosol;GO:0005886|plasma membrane;GO:0009986|cell surface;GO:0032991|protein-containing complex;GO:0048471|perinuclear region of cytoplasm;GO:0005524|ATP binding;GO:0051082|unfolded protein binding	ko04141;ko04626	771	789	780	0.665644	5.5	UGAGAG--CAAGAAGGCUGUU&CACAGCUUUCUUGAACUUUCU	35	2266.99	2	0.311621	Output/long789/cleaveLand_result/t_plot/hbr-miR396a_TRINITY_DN8340_c0_g2_i1_780_TPlot.pdf	163	6197.95	2	0.339316	Output/short456/cleaveLand_result/t_plot/hbr-miR396a_TRINITY_DN8340_c0_g2_i1_780_TPlot.pdf	2266.99	6197.95	-1.45102	down	0	0
hbr-miR396a	TRINITY_DN9156_c0_g2_i1	TRINITY_DN9156_c0_g2	NA	NA	GO:0005886|plasma membrane;GO:0016021|integral component of membrane;GO:0005524|ATP binding;GO:0106310|protein serine kinase activity;GO:0106311|protein threonine kinase activity	NA	637	657	649	0.653374	5.5	AGAUGGGUUUGAG-AAGCUGUG&CACAGCUUUCUUGAACUU-UCU	5	323.855	3	0.543266	Output/long789/cleaveLand_result/t_plot/hbr-miR396a_TRINITY_DN9156_c0_g2_i1_649_TPlot.pdf	0	0	NA	NA	NA	323.855	0	Inf	up	2.0406e-72	7.88259e-72
hbr-miR396a	TRINITY_DN9156_c0_g2_i2	TRINITY_DN9156_c0_g2	NA	NA	GO:0005886|plasma membrane;GO:0016021|integral component of membrane;GO:0005524|ATP binding;GO:0106310|protein serine kinase activity;GO:0106311|protein threonine kinase activity	NA	653	673	665	0.653374	5.5	AGAUGGGUUUGAG-AAGCUGUG&CACAGCUUUCUUGAACUU-UCU	4	259.084	3	0.547667	Output/long789/cleaveLand_result/t_plot/hbr-miR396a_TRINITY_DN9156_c0_g2_i2_665_TPlot.pdf	0	0	NA	NA	NA	259.084	0	Inf	up	2.672e-58	8.29613e-58
hbr-miR6485	TRINITY_DN1689_c0_g1_i10	TRINITY_DN1689_c0_g1	NA	NA	GO:0051453|regulation of intracellular pH;GO:0055075|potassium ion homeostasis;GO:0071805|potassium ion transmembrane transport;GO:0098719|sodium ion import across plasma membrane;GO:0005774|vacuolar membrane;GO:0005886|plasma membrane;GO:0016021|integral component of membrane;GO:0015081|sodium ion transmembrane transporter activity;GO:0015385|sodium:proton antiporter activity;GO:0015386|potassiu…	NA	261	279	271	0.689873	6	GGCUGCUCUUC-ACAUCUUA&UAGGAUGUAGAAGAGCAUAA	0	0	NA	NA	NA	1	38.0243	4	0.24938	Output/short456/cleaveLand_result/t_plot/hbr-miR6485_TRINITY_DN1689_c0_g1_i10_271_TPlot.pdf	0	38.0243	-Inf	down	6.9845e-10	7.47646e-10
hbr-miR6485	TRINITY_DN1689_c0_g1_i13	TRINITY_DN1689_c0_g1	NA	NA	GO:0051453|regulation of intracellular pH;GO:0055075|potassium ion homeostasis;GO:0071805|potassium ion transmembrane transport;GO:0098719|sodium ion import across plasma membrane;GO:0005774|vacuolar membrane;GO:0005886|plasma membrane;GO:0016021|integral component of membrane;GO:0015081|sodium ion transmembrane transporter activity;GO:0015385|sodium:proton antiporter activity;GO:0015386|potassiu…	NA	1412	1430	1422	0.689873	6	GGCUGCUCUUC-ACAUCUUA&UAGGAUGUAGAAGAGCAUAA	0	0	NA	NA	NA	1	38.0243	4	0.247591	Output/short456/cleaveLand_result/t_plot/hbr-miR6485_TRINITY_DN1689_c0_g1_i13_1422_TPlot.pdf	0	38.0243	-Inf	down	6.9845e-10	7.47646e-10
hbr-miR6485	TRINITY_DN1689_c0_g1_i14	TRINITY_DN1689_c0_g1	NA	NA	GO:0051453|regulation of intracellular pH;GO:0055075|potassium ion homeostasis;GO:0071805|potassium ion transmembrane transport;GO:0098719|sodium ion import across plasma membrane;GO:0005774|vacuolar membrane;GO:0005886|plasma membrane;GO:0016021|integral component of membrane;GO:0015081|sodium ion transmembrane transporter activity;GO:0015385|sodium:proton antiporter activity;GO:0015386|potassiu…	NA	1612	1630	1622	0.689873	6	GGCUGCUCUUC-ACAUCUUA&UAGGAUGUAGAAGAGCAUAA	0	0	NA	NA	NA	1	38.0243	4	0.2443	Output/short456/cleaveLand_result/t_plot/hbr-miR6485_TRINITY_DN1689_c0_g1_i14_1622_TPlot.pdf	0	38.0243	-Inf	down	6.9845e-10	7.47646e-10
hbr-miR6485	TRINITY_DN1689_c0_g1_i15	TRINITY_DN1689_c0_g1	NA	NA	GO:0051453|regulation of intracellular pH;GO:0055075|potassium ion homeostasis;GO:0071805|potassium ion transmembrane transport;GO:0098719|sodium ion import across plasma membrane;GO:0005774|vacuolar membrane;GO:0005886|plasma membrane;GO:0016021|integral component of membrane;GO:0015081|sodium ion transmembrane transporter activity;GO:0015385|sodium:proton antiporter activity;GO:0015386|potassiu…	NA	1544	1562	1554	0.689873	6	GGCUGCUCUUC-ACAUCUUA&UAGGAUGUAGAAGAGCAUAA	0	0	NA	NA	NA	1	38.0243	4	0.247292	Output/short456/cleaveLand_result/t_plot/hbr-miR6485_TRINITY_DN1689_c0_g1_i15_1554_TPlot.pdf	0	38.0243	-Inf	down	6.9845e-10	7.47646e-10
hbr-miR6485	TRINITY_DN1689_c0_g1_i2	TRINITY_DN1689_c0_g1	NA	NA	GO:0051453|regulation of intracellular pH;GO:0055075|potassium ion homeostasis;GO:0071805|potassium ion transmembrane transport;GO:0098719|sodium ion import across plasma membrane;GO:0005774|vacuolar membrane;GO:0005886|plasma membrane;GO:0016021|integral component of membrane;GO:0015081|sodium ion transmembrane transporter activity;GO:0015385|sodium:proton antiporter activity;GO:0015386|potassiu…	NA	1426	1444	1436	0.689873	6	GGCUGCUCUUC-ACAUCUUA&UAGGAUGUAGAAGAGCAUAA	1	64.771	4	0.204786	Output/long789/cleaveLand_result/t_plot/hbr-miR6485_TRINITY_DN1689_c0_g1_i2_1436_TPlot.pdf	0	0	NA	NA	NA	64.771	0	Inf	up	8.4037e-16	1.0516e-15
hbr-miR6485	TRINITY_DN1689_c0_g1_i22	TRINITY_DN1689_c0_g1	NA	NA	GO:0051453|regulation of intracellular pH;GO:0055075|potassium ion homeostasis;GO:0071805|potassium ion transmembrane transport;GO:0098719|sodium ion import across plasma membrane;GO:0005774|vacuolar membrane;GO:0005886|plasma membrane;GO:0016021|integral component of membrane;GO:0015081|sodium ion transmembrane transporter activity;GO:0015385|sodium:proton antiporter activity;GO:0015386|potassiu…	NA	1619	1637	1629	0.689873	6	GGCUGCUCUUC-ACAUCUUA&UAGGAUGUAGAAGAGCAUAA	1	64.771	4	0.211221	Output/long789/cleaveLand_result/t_plot/hbr-miR6485_TRINITY_DN1689_c0_g1_i22_1629_TPlot.pdf	1	38.0243	4	0.251462	Output/short456/cleaveLand_result/t_plot/hbr-miR6485_TRINITY_DN1689_c0_g1_i22_1629_TPlot.pdf	64.771	38.0243	0.768429	up	0.0083365	0.00847593
hbr-miR6485	TRINITY_DN1689_c0_g1_i29	TRINITY_DN1689_c0_g1	NA	NA	GO:0015969|guanosine tetraphosphate metabolic process;GO:0009507|chloroplast;GO:0005524|ATP binding;GO:0005525|GTP binding;GO:0008728|GTP diphosphokinase activity;GO:0016301|kinase activity	NA	1784	1802	1794	0.689873	6	GGCUGCUCUUC-ACAUCUUA&UAGGAUGUAGAAGAGCAUAA	0	0	NA	NA	NA	1	38.0243	4	0.25413	Output/short456/cleaveLand_result/t_plot/hbr-miR6485_TRINITY_DN1689_c0_g1_i29_1794_TPlot.pdf	0	38.0243	-Inf	down	6.9845e-10	7.47646e-10
hbr-miR6485	TRINITY_DN1689_c0_g1_i36	TRINITY_DN1689_c0_g1	NA	NA	GO:0051453|regulation of intracellular pH;GO:0055075|potassium ion homeostasis;GO:0071805|potassium ion transmembrane transport;GO:0098719|sodium ion import across plasma membrane;GO:0005774|vacuolar membrane;GO:0005886|plasma membrane;GO:0016021|integral component of membrane;GO:0015081|sodium ion transmembrane transporter activity;GO:0015385|sodium:proton antiporter activity;GO:0015386|potassiu…	NA	1712	1730	1722	0.689873	6	GGCUGCUCUUC-ACAUCUUA&UAGGAUGUAGAAGAGCAUAA	0	0	NA	NA	NA	1	38.0243	4	0.250273	Output/short456/cleaveLand_result/t_plot/hbr-miR6485_TRINITY_DN1689_c0_g1_i36_1722_TPlot.pdf	0	38.0243	-Inf	down	6.9845e-10	7.47646e-10
hbr-miR6485	TRINITY_DN1689_c0_g1_i38	TRINITY_DN1689_c0_g1	NA	NA	GO:0015969|guanosine tetraphosphate metabolic process;GO:0009507|chloroplast;GO:0005524|ATP binding;GO:0005525|GTP binding;GO:0008728|GTP diphosphokinase activity;GO:0016301|kinase activity	NA	1709	1727	1719	0.689873	6	GGCUGCUCUUC-ACAUCUUA&UAGGAUGUAGAAGAGCAUAA	1	64.771	4	0.201937	Output/long789/cleaveLand_result/t_plot/hbr-miR6485_TRINITY_DN1689_c0_g1_i38_1719_TPlot.pdf	0	0	NA	NA	NA	64.771	0	Inf	up	8.4037e-16	1.0516e-15
hbr-miR6485	TRINITY_DN1689_c0_g1_i5	TRINITY_DN1689_c0_g1	NA	NA	GO:0051453|regulation of intracellular pH;GO:0055075|potassium ion homeostasis;GO:0071805|potassium ion transmembrane transport;GO:0098719|sodium ion import across plasma membrane;GO:0005774|vacuolar membrane;GO:0005886|plasma membrane;GO:0016021|integral component of membrane;GO:0015081|sodium ion transmembrane transporter activity;GO:0015385|sodium:proton antiporter activity;GO:0015386|potassiu…	NA	1784	1802	1794	0.689873	6	GGCUGCUCUUC-ACAUCUUA&UAGGAUGUAGAAGAGCAUAA	0	0	NA	NA	NA	1	38.0243	4	0.246097	Output/short456/cleaveLand_result/t_plot/hbr-miR6485_TRINITY_DN1689_c0_g1_i5_1794_TPlot.pdf	0	38.0243	-Inf	down	6.9845e-10	7.47646e-10
hbr-miR6485	TRINITY_DN1689_c0_g1_i6	TRINITY_DN1689_c0_g1	NA	NA	GO:0051453|regulation of intracellular pH;GO:0055075|potassium ion homeostasis;GO:0071805|potassium ion transmembrane transport;GO:0098719|sodium ion import across plasma membrane;GO:0005774|vacuolar membrane;GO:0005886|plasma membrane;GO:0016021|integral component of membrane;GO:0015081|sodium ion transmembrane transporter activity;GO:0015385|sodium:proton antiporter activity;GO:0015386|potassiu…	NA	969	987	979	0.689873	6	GGCUGCUCUUC-ACAUCUUA&UAGGAUGUAGAAGAGCAUAA	1	64.771	4	0.200899	Output/long789/cleaveLand_result/t_plot/hbr-miR6485_TRINITY_DN1689_c0_g1_i6_979_TPlot.pdf	0	0	NA	NA	NA	64.771	0	Inf	up	8.4037e-16	1.0516e-15
hci-miR156a	TRINITY_DN17771_c0_g1_i1	TRINITY_DN17771_c0_g1	NA	NA	NA	NA	13	32	23	0.934659	1.5	GUGCUCUCUCUCUUCUGUCA&UGACAGAAGAGAGUGAGUAC	3	194.313	3	0.0150146	Output/long789/cleaveLand_result/t_plot/hci-miR156a_TRINITY_DN17771_c0_g1_i1_23_TPlot.pdf	0	0	NA	NA	NA	194.313	0	Inf	up	3.6042e-44	8.09893e-44
hci-miR156a	TRINITY_DN21229_c0_g1_i1	TRINITY_DN21229_c0_g1	NA	NA	NA	NA	1493	1512	1503	0.713068	6.5	GUACUCGCCCUUUUCUGUGG&UGACAGAAGAGAGUGAGUAC	1	64.771	4	0.0813333	Output/long789/cleaveLand_result/t_plot/hci-miR156a_TRINITY_DN21229_c0_g1_i1_1503_TPlot.pdf	0	0	NA	NA	NA	64.771	0	Inf	up	8.4037e-16	1.0516e-15
hci-miR156a	TRINITY_DN21229_c0_g1_i2	TRINITY_DN21229_c0_g1	NA	NA	NA	NA	1493	1512	1503	0.713068	6.5	GUACUCGCCCUUUUCUGUGG&UGACAGAAGAGAGUGAGUAC	4	259.084	3	0.151252	Output/long789/cleaveLand_result/t_plot/hci-miR156a_TRINITY_DN21229_c0_g1_i2_1503_TPlot.pdf	0	0	NA	NA	NA	259.084	0	Inf	up	2.672e-58	8.29613e-58
hci-miR156a	TRINITY_DN6217_c0_g1_i3	TRINITY_DN6217_c0_g1	NA	NA	NA	NA	274	293	284	0.789773	4.5	GUGCUCUCUCUCCUCUGUCG&UGACAGAAGAGAGUGAGUAC	4	259.084	3	0.0344892	Output/long789/cleaveLand_result/t_plot/hci-miR156a_TRINITY_DN6217_c0_g1_i3_284_TPlot.pdf	1	38.0243	4	0.0227492	Output/short456/cleaveLand_result/t_plot/hci-miR156a_TRINITY_DN6217_c0_g1_i3_284_TPlot.pdf	259.084	38.0243	2.76843	up	1.1756e-37	2.42901e-37
hci-miR156a	TRINITY_DN6217_c0_g1_i7	TRINITY_DN6217_c0_g1	NA	NA	NA	NA	274	293	284	0.789773	4.5	GUGCUCUCUCUCCUCUGUCG&UGACAGAAGAGAGUGAGUAC	1	64.771	4	0.0183559	Output/long789/cleaveLand_result/t_plot/hci-miR156a_TRINITY_DN6217_c0_g1_i7_284_TPlot.pdf	1	38.0243	4	0.0223614	Output/short456/cleaveLand_result/t_plot/hci-miR156a_TRINITY_DN6217_c0_g1_i7_284_TPlot.pdf	64.771	38.0243	0.768429	up	0.0083365	0.00847593
hci-miR156a	TRINITY_DN6217_c0_g1_i8	TRINITY_DN6217_c0_g1	NA	NA	NA	NA	274	293	284	0.789773	4.5	GUGCUCUCUCUCCUCUGUCG&UGACAGAAGAGAGUGAGUAC	3	194.313	3	0.0374062	Output/long789/cleaveLand_result/t_plot/hci-miR156a_TRINITY_DN6217_c0_g1_i8_284_TPlot.pdf	1	38.0243	4	0.0246859	Output/short456/cleaveLand_result/t_plot/hci-miR156a_TRINITY_DN6217_c0_g1_i8_284_TPlot.pdf	194.313	38.0243	2.35339	up	1.1354e-24	1.84702e-24
hci-miR156a	TRINITY_DN9504_c0_g1_i1	TRINITY_DN9504_c0_g1	NA	NA	GO:0005886|plasma membrane;GO:0016021|integral component of membrane;GO:0005524|ATP binding;GO:0106310|protein serine kinase activity;GO:0106311|protein threonine kinase activity	NA	1947	1966	1957	0.934659	1.5	GUGCUCUCUCUCUUCUGUCA&UGACAGAAGAGAGUGAGUAC	1	64.771	4	0.00680231	Output/long789/cleaveLand_result/t_plot/hci-miR156a_TRINITY_DN9504_c0_g1_i1_1957_TPlot.pdf	0	0	NA	NA	NA	64.771	0	Inf	up	8.4037e-16	1.0516e-15
hci-miR156a	TRINITY_DN9504_c0_g1_i11	TRINITY_DN9504_c0_g1	NA	NA	GO:0005886|plasma membrane;GO:0016021|integral component of membrane;GO:0005524|ATP binding;GO:0106310|protein serine kinase activity;GO:0106311|protein threonine kinase activity	NA	1730	1749	1740	0.934659	1.5	GUGCUCUCUCUCUUCUGUCA&UGACAGAAGAGAGUGAGUAC	3	194.313	3	0.0132248	Output/long789/cleaveLand_result/t_plot/hci-miR156a_TRINITY_DN9504_c0_g1_i11_1740_TPlot.pdf	0	0	NA	NA	NA	194.313	0	Inf	up	3.6042e-44	8.09893e-44
hci-miR156a	TRINITY_DN9504_c0_g1_i6	TRINITY_DN9504_c0_g1	NA	NA	GO:0005886|plasma membrane;GO:0016021|integral component of membrane;GO:0005524|ATP binding;GO:0106310|protein serine kinase activity;GO:0106311|protein threonine kinase activity	NA	814	833	824	0.934659	1.5	GUGCUCUCUCUCUUCUGUCA&UGACAGAAGAGAGUGAGUAC	3	194.313	3	0.0138218	Output/long789/cleaveLand_result/t_plot/hci-miR156a_TRINITY_DN9504_c0_g1_i6_824_TPlot.pdf	0	0	NA	NA	NA	194.313	0	Inf	up	3.6042e-44	8.09893e-44
lja-miR168-5p	TRINITY_DN2640_c1_g1_i1	TRINITY_DN2640_c1_g1	NA	NA	GO:0006417|regulation of translation;GO:0009616|RNAi-mediated antiviral immune response;GO:0009733|response to auxin;GO:0009850|auxin metabolic process;GO:0009955|adaxial/abaxial pattern specification;GO:0009965|leaf morphogenesis;GO:0010218|response to far red light;GO:0010305|leaf vascular tissue pattern formation;GO:0010589|leaf proximal/distal pattern formation;GO:0016032|viral process;GO:001…	NA	637	658	649	0.773218	5	GUCCCCGAGCUGCACCAAGCUA&UCGCUUGGUGCAGGUCGGGAAC	3	194.313	3	0.0168011	Output/long789/cleaveLand_result/t_plot/lja-miR168-5p_TRINITY_DN2640_c1_g1_i1_649_TPlot.pdf	0	0	NA	NA	NA	194.313	0	Inf	up	3.6042e-44	8.09893e-44
lja-miR168-5p	TRINITY_DN2640_c1_g1_i2	TRINITY_DN2640_c1_g1	NA	NA	GO:0006417|regulation of translation;GO:0009616|RNAi-mediated antiviral immune response;GO:0009733|response to auxin;GO:0009850|auxin metabolic process;GO:0009955|adaxial/abaxial pattern specification;GO:0009965|leaf morphogenesis;GO:0010218|response to far red light;GO:0010305|leaf vascular tissue pattern formation;GO:0010589|leaf proximal/distal pattern formation;GO:0016032|viral process;GO:001…	NA	637	658	649	0.773218	5	GUCCCCGAGCUGCACCAAGCUA&UCGCUUGGUGCAGGUCGGGAAC	3	194.313	3	0.016206	Output/long789/cleaveLand_result/t_plot/lja-miR168-5p_TRINITY_DN2640_c1_g1_i2_649_TPlot.pdf	0	0	NA	NA	NA	194.313	0	Inf	up	3.6042e-44	8.09893e-44
lus-miR167a	TRINITY_DN8922_c0_g2_i1	TRINITY_DN8922_c0_g2	NA	NA	GO:0006997|nucleus organization;GO:0097298|regulation of nucleus size;GO:0005634|nucleus;GO:0005635|nuclear envelope;GO:0005652|nuclear lamina;GO:0005654|nucleoplasm;GO:0005739|mitochondrion;GO:0005829|cytosol;GO:0031965|nuclear membrane;GO:0034399|nuclear periphery	NA	5675	5694	5686	0.696296	6	GAGAUCAUGCUGG-AGACUCA&UGAAGCUGCCAGCAUGAUCUC	12	777.252	2	0.0595148	Output/long789/cleaveLand_result/t_plot/lus-miR167a_TRINITY_DN8922_c0_g2_i1_5686_TPlot.pdf	2	76.0485	3	0.104891	Output/short456/cleaveLand_result/t_plot/lus-miR167a_TRINITY_DN8922_c0_g2_i1_5686_TPlot.pdf	777.252	76.0485	3.35339	up	0	0
lus-miR167a	TRINITY_DN8922_c0_g2_i4	TRINITY_DN8922_c0_g2	NA	NA	GO:0006997|nucleus organization;GO:0097298|regulation of nucleus size;GO:0005634|nucleus;GO:0005635|nuclear envelope;GO:0005652|nuclear lamina;GO:0005654|nucleoplasm;GO:0005739|mitochondrion;GO:0005829|cytosol;GO:0031965|nuclear membrane;GO:0034399|nuclear periphery	NA	4490	4509	4501	0.696296	6	GAGAUCAUGCUGG-AGACUCA&UGAAGCUGCCAGCAUGAUCUC	8	518.168	2	0.0605035	Output/long789/cleaveLand_result/t_plot/lus-miR167a_TRINITY_DN8922_c0_g2_i4_4501_TPlot.pdf	4	152.097	3	0.10659	Output/short456/cleaveLand_result/t_plot/lus-miR167a_TRINITY_DN8922_c0_g2_i4_4501_TPlot.pdf	518.168	152.097	1.76843	up	2.0885e-45	6.07611e-45
lus-miR167a	TRINITY_DN8922_c0_g2_i8	TRINITY_DN8922_c0_g2	NA	NA	GO:0006997|nucleus organization;GO:0097298|regulation of nucleus size;GO:0005634|nucleus;GO:0005635|nuclear envelope;GO:0005652|nuclear lamina;GO:0005654|nucleoplasm;GO:0005739|mitochondrion;GO:0005829|cytosol;GO:0031965|nuclear membrane;GO:0034399|nuclear periphery	NA	5029	5048	5040	0.696296	6	GAGAUCAUGCUGG-AGACUCA&UGAAGCUGCCAGCAUGAUCUC	13	842.023	2	0.0611621	Output/long789/cleaveLand_result/t_plot/lus-miR167a_TRINITY_DN8922_c0_g2_i8_5040_TPlot.pdf	4	152.097	3	0.107721	Output/short456/cleaveLand_result/t_plot/lus-miR167a_TRINITY_DN8922_c0_g2_i8_5040_TPlot.pdf	842.023	152.097	2.46887	up	0	0
lus-miR167a	TRINITY_DN8922_c0_g2_i9	TRINITY_DN8922_c0_g2	NA	NA	GO:0006997|nucleus organization;GO:0097298|regulation of nucleus size;GO:0005634|nucleus;GO:0005635|nuclear envelope;GO:0005652|nuclear lamina;GO:0005654|nucleoplasm;GO:0005739|mitochondrion;GO:0005829|cytosol;GO:0031965|nuclear membrane;GO:0034399|nuclear periphery	NA	3844	3863	3855	0.696296	6	GAGAUCAUGCUGG-AGACUCA&UGAAGCUGCCAGCAUGAUCUC	8	518.168	2	0.0608329	Output/long789/cleaveLand_result/t_plot/lus-miR167a_TRINITY_DN8922_c0_g2_i9_3855_TPlot.pdf	2	76.0485	3	0.107155	Output/short456/cleaveLand_result/t_plot/lus-miR167a_TRINITY_DN8922_c0_g2_i9_3855_TPlot.pdf	518.168	76.0485	2.76843	up	1.5465e-73	6.40218e-73
lus-miR397a	TRINITY_DN6927_c0_g1_i10	TRINITY_DN6927_c0_g1	NA	NA	NA	NA	1270	1291	1282	0.69209	6.5	GAUAUCAAUCGCUGCAUUCGAG&AUUGAGUGCAGCG-UUGAUGAA	1	64.771	4	0.151927	Output/long789/cleaveLand_result/t_plot/lus-miR397a_TRINITY_DN6927_c0_g1_i10_1282_TPlot.pdf	0	0	NA	NA	NA	64.771	0	Inf	up	8.4037e-16	1.0516e-15
lus-miR397a	TRINITY_DN6927_c0_g1_i16	TRINITY_DN6927_c0_g1	NA	NA	NA	NA	1270	1291	1282	0.69209	6.5	GAUAUCAAUCGCUGCAUUCGAG&AUUGAGUGCAGCG-UUGAUGAA	1	64.771	4	0.147782	Output/long789/cleaveLand_result/t_plot/lus-miR397a_TRINITY_DN6927_c0_g1_i16_1282_TPlot.pdf	0	0	NA	NA	NA	64.771	0	Inf	up	8.4037e-16	1.0516e-15
mdm-miR11007	TRINITY_DN2967_c0_g1_i15	TRINITY_DN2967_c0_g1	NA	NA	NA	NA	1184	1203	1194	0.68254	4.5	AUGU-UCAGAAUGAUUGAUGG&CCGUCAAUUAUUUUGGUACGU	2	129.542	1	0.00570837	Output/long789/cleaveLand_result/t_plot/mdm-miR11007_TRINITY_DN2967_c0_g1_i15_1194_TPlot.pdf	0	0	NA	NA	NA	129.542	0	Inf	up	5.1393e-30	9.14621e-30
mdm-miR11007	TRINITY_DN2967_c0_g1_i16	TRINITY_DN2967_c0_g1	NA	NA	NA	NA	919	938	929	0.68254	4.5	AUGU-UCAGAAUGAUUGAUGG&CCGUCAAUUAUUUUGGUACGU	8	518.168	0	0.0282136	Output/long789/cleaveLand_result/t_plot/mdm-miR11007_TRINITY_DN2967_c0_g1_i16_929_TPlot.pdf	0	0	NA	NA	NA	518.168	0	Inf	up	0	0
mdm-miR11007	TRINITY_DN2967_c0_g1_i21	TRINITY_DN2967_c0_g1	NA	NA	NA	NA	919	938	929	0.68254	4.5	AUGU-UCAGAAUGAUUGAUGG&CCGUCAAUUAUUUUGGUACGU	4	259.084	3	0.164501	Output/long789/cleaveLand_result/t_plot/mdm-miR11007_TRINITY_DN2967_c0_g1_i21_929_TPlot.pdf	0	0	NA	NA	NA	259.084	0	Inf	up	2.672e-58	8.29613e-58
mdm-miR11007	TRINITY_DN2967_c0_g1_i24	TRINITY_DN2967_c0_g1	NA	NA	NA	NA	545	564	555	0.68254	4.5	AUGU-UCAGAAUGAUUGAUGG&CCGUCAAUUAUUUUGGUACGU	4	259.084	3	0.165512	Output/long789/cleaveLand_result/t_plot/mdm-miR11007_TRINITY_DN2967_c0_g1_i24_555_TPlot.pdf	0	0	NA	NA	NA	259.084	0	Inf	up	2.672e-58	8.29613e-58
mdm-miR11007	TRINITY_DN2967_c0_g1_i5	TRINITY_DN2967_c0_g1	NA	NA	NA	NA	583	602	593	0.68254	4.5	AUGU-UCAGAAUGAUUGAUGG&CCGUCAAUUAUUUUGGUACGU	6	388.626	0	0.0306209	Output/long789/cleaveLand_result/t_plot/mdm-miR11007_TRINITY_DN2967_c0_g1_i5_593_TPlot.pdf	0	0	NA	NA	NA	388.626	0	Inf	up	1.5868e-86	7.5422e-86
mdm-miR156ae	TRINITY_DN17771_c0_g1_i1	TRINITY_DN17771_c0_g1	NA	NA	NA	NA	13	32	23	0.826087	3	GUGCUCUCUCUCUUCUGUCA&UGACAGAAGAAAGUGAGCAC	3	194.313	3	0.0168011	Output/long789/cleaveLand_result/t_plot/mdm-miR156ae_TRINITY_DN17771_c0_g1_i1_23_TPlot.pdf	0	0	NA	NA	NA	194.313	0	Inf	up	3.6042e-44	8.09893e-44
mdm-miR156ae	TRINITY_DN6217_c0_g1_i3	TRINITY_DN6217_c0_g1	NA	NA	NA	NA	274	293	284	0.678261	6	GUGCUCUCUCUCCUCUGUCG&UGACAGAAGAAAGUGAGCAC	4	259.084	3	0.187929	Output/long789/cleaveLand_result/t_plot/mdm-miR156ae_TRINITY_DN6217_c0_g1_i3_284_TPlot.pdf	1	38.0243	4	0.12758	Output/short456/cleaveLand_result/t_plot/mdm-miR156ae_TRINITY_DN6217_c0_g1_i3_284_TPlot.pdf	259.084	38.0243	2.76843	up	1.1756e-37	2.42901e-37
mdm-miR156ae	TRINITY_DN6217_c0_g1_i7	TRINITY_DN6217_c0_g1	NA	NA	NA	NA	274	293	284	0.678261	6	GUGCUCUCUCUCCUCUGUCG&UGACAGAAGAAAGUGAGCAC	1	64.771	4	0.105494	Output/long789/cleaveLand_result/t_plot/mdm-miR156ae_TRINITY_DN6217_c0_g1_i7_284_TPlot.pdf	1	38.0243	4	0.127234	Output/short456/cleaveLand_result/t_plot/mdm-miR156ae_TRINITY_DN6217_c0_g1_i7_284_TPlot.pdf	64.771	38.0243	0.768429	up	0.0083365	0.00847593
mdm-miR156ae	TRINITY_DN6217_c0_g1_i8	TRINITY_DN6217_c0_g1	NA	NA	NA	NA	274	293	284	0.678261	6	GUGCUCUCUCUCCUCUGUCG&UGACAGAAGAAAGUGAGCAC	3	194.313	3	0.191362	Output/long789/cleaveLand_result/t_plot/mdm-miR156ae_TRINITY_DN6217_c0_g1_i8_284_TPlot.pdf	1	38.0243	4	0.13	Output/short456/cleaveLand_result/t_plot/mdm-miR156ae_TRINITY_DN6217_c0_g1_i8_284_TPlot.pdf	194.313	38.0243	2.35339	up	1.1354e-24	1.84702e-24
mdm-miR156ae	TRINITY_DN9504_c0_g1_i1	TRINITY_DN9504_c0_g1	NA	NA	GO:0005886|plasma membrane;GO:0016021|integral component of membrane;GO:0005524|ATP binding;GO:0106310|protein serine kinase activity;GO:0106311|protein threonine kinase activity	NA	1947	1966	1957	0.826087	3	GUGCUCUCUCUCUUCUGUCA&UGACAGAAGAAAGUGAGCAC	1	64.771	4	0.00744773	Output/long789/cleaveLand_result/t_plot/mdm-miR156ae_TRINITY_DN9504_c0_g1_i1_1957_TPlot.pdf	0	0	NA	NA	NA	64.771	0	Inf	up	8.4037e-16	1.0516e-15
mdm-miR156ae	TRINITY_DN9504_c0_g1_i11	TRINITY_DN9504_c0_g1	NA	NA	GO:0005886|plasma membrane;GO:0016021|integral component of membrane;GO:0005524|ATP binding;GO:0106310|protein serine kinase activity;GO:0106311|protein threonine kinase activity	NA	1730	1749	1740	0.826087	3	GUGCUCUCUCUCUUCUGUCA&UGACAGAAGAAAGUGAGCAC	3	194.313	3	0.0144184	Output/long789/cleaveLand_result/t_plot/mdm-miR156ae_TRINITY_DN9504_c0_g1_i11_1740_TPlot.pdf	0	0	NA	NA	NA	194.313	0	Inf	up	3.6042e-44	8.09893e-44
mdm-miR156ae	TRINITY_DN9504_c0_g1_i6	TRINITY_DN9504_c0_g1	NA	NA	GO:0005886|plasma membrane;GO:0016021|integral component of membrane;GO:0005524|ATP binding;GO:0106310|protein serine kinase activity;GO:0106311|protein threonine kinase activity	NA	814	833	824	0.826087	3	GUGCUCUCUCUCUUCUGUCA&UGACAGAAGAAAGUGAGCAC	3	194.313	3	0.0156105	Output/long789/cleaveLand_result/t_plot/mdm-miR156ae_TRINITY_DN9504_c0_g1_i6_824_TPlot.pdf	0	0	NA	NA	NA	194.313	0	Inf	up	3.6042e-44	8.09893e-44
mdm-miR319b-5p	TRINITY_DN354_c0_g3_i1	TRINITY_DN354_c0_g3	NA	NA	GO:0015986|ATP synthesis coupled proton transport;GO:0000276|mitochondrial proton-transporting ATP synthase complex, coupling factor F(o);GO:0016021|integral component of membrane;GO:0045263|proton-transporting ATP synthase complex, coupling factor F(o);GO:0005524|ATP binding;GO:0008289|lipid binding;GO:0046933|proton-transporting ATP synthase activity, rotational mechanism	ko00190;ko01100	3632	3651	3642	0.667582	4.5	GAGCAGG-UUGAAGAGAGCUC&GAGCUUUCUUCAGUCC-ACUC	5	323.855	3	0.505585	Output/long789/cleaveLand_result/t_plot/mdm-miR319b-5p_TRINITY_DN354_c0_g3_i1_3642_TPlot.pdf	0	0	NA	NA	NA	323.855	0	Inf	up	2.0406e-72	7.88259e-72
mdm-miR319b-5p	TRINITY_DN354_c0_g3_i2	TRINITY_DN354_c0_g3	NA	NA	GO:0005886|plasma membrane;GO:0016021|integral component of membrane;GO:0005524|ATP binding;GO:0106310|protein serine kinase activity;GO:0106311|protein threonine kinase activity	NA	10923	10942	10933	0.667582	4.5	GAGCAGG-UUGAAGAGAGCUC&GAGCUUUCUUCAGUCC-ACUC	12	777.252	3	0.499565	Output/long789/cleaveLand_result/t_plot/mdm-miR319b-5p_TRINITY_DN354_c0_g3_i2_10933_TPlot.pdf	0	0	NA	NA	NA	777.252	0	Inf	up	0	0
mdm-miR319b-5p	TRINITY_DN5281_c0_g1_i10	TRINITY_DN5281_c0_g1	NA	NA	NA	NA	2505	2523	2514	0.656593	5.5	GGGUGG-CUGAACGAAGUUC&GAGCUUUCUUCAGUCCACUC	1	64.771	4	0.363096	Output/long789/cleaveLand_result/t_plot/mdm-miR319b-5p_TRINITY_DN5281_c0_g1_i10_2514_TPlot.pdf	0	0	NA	NA	NA	64.771	0	Inf	up	8.4037e-16	1.0516e-15
mdm-miR319b-5p	TRINITY_DN5281_c0_g1_i12	TRINITY_DN5281_c0_g1	NA	NA	NA	NA	2787	2805	2796	0.656593	5.5	GGGUGG-CUGAACGAAGUUC&GAGCUUUCUUCAGUCCACUC	1	64.771	4	0.354762	Output/long789/cleaveLand_result/t_plot/mdm-miR319b-5p_TRINITY_DN5281_c0_g1_i12_2796_TPlot.pdf	0	0	NA	NA	NA	64.771	0	Inf	up	8.4037e-16	1.0516e-15
mdm-miR319b-5p	TRINITY_DN5281_c0_g1_i2	TRINITY_DN5281_c0_g1	NA	NA	NA	NA	2187	2205	2196	0.656593	5.5	GGGUGG-CUGAACGAAGUUC&GAGCUUUCUUCAGUCCACUC	3	194.313	3	0.569304	Output/long789/cleaveLand_result/t_plot/mdm-miR319b-5p_TRINITY_DN5281_c0_g1_i2_2196_TPlot.pdf	0	0	NA	NA	NA	194.313	0	Inf	up	3.6042e-44	8.09893e-44
mdm-miR319b-5p	TRINITY_DN5281_c0_g1_i3	TRINITY_DN5281_c0_g1	NA	NA	NA	NA	417	435	426	0.656593	5.5	GGGUGG-CUGAACGAAGUUC&GAGCUUUCUUCAGUCCACUC	4	259.084	2	0.387695	Output/long789/cleaveLand_result/t_plot/mdm-miR319b-5p_TRINITY_DN5281_c0_g1_i3_426_TPlot.pdf	0	0	NA	NA	NA	259.084	0	Inf	up	2.672e-58	8.29613e-58
mdm-miR319b-5p	TRINITY_DN5281_c0_g1_i4	TRINITY_DN5281_c0_g1	NA	NA	NA	NA	417	435	426	0.656593	5.5	GGGUGG-CUGAACGAAGUUC&GAGCUUUCUUCAGUCCACUC	3	194.313	3	0.558751	Output/long789/cleaveLand_result/t_plot/mdm-miR319b-5p_TRINITY_DN5281_c0_g1_i4_426_TPlot.pdf	0	0	NA	NA	NA	194.313	0	Inf	up	3.6042e-44	8.09893e-44
mdm-miR319b-5p	TRINITY_DN5281_c0_g1_i6	TRINITY_DN5281_c0_g1	NA	NA	NA	NA	3475	3493	3484	0.656593	5.5	GGGUGG-CUGAACGAAGUUC&GAGCUUUCUUCAGUCCACUC	2	129.542	3	0.56406	Output/long789/cleaveLand_result/t_plot/mdm-miR319b-5p_TRINITY_DN5281_c0_g1_i6_3484_TPlot.pdf	0	0	NA	NA	NA	129.542	0	Inf	up	5.1393e-30	9.14621e-30
mdm-miR319b-5p	TRINITY_DN5281_c0_g1_i9	TRINITY_DN5281_c0_g1	NA	NA	NA	NA	1568	1586	1577	0.656593	5.5	GGGUGG-CUGAACGAAGUUC&GAGCUUUCUUCAGUCCACUC	2	129.542	3	0.559818	Output/long789/cleaveLand_result/t_plot/mdm-miR319b-5p_TRINITY_DN5281_c0_g1_i9_1577_TPlot.pdf	0	0	NA	NA	NA	129.542	0	Inf	up	5.1393e-30	9.14621e-30
mdm-miR319b-5p	TRINITY_DN56_c0_g1_i19	TRINITY_DN56_c0_g1	NA	NA	GO:0006814|sodium ion transport;GO:0006874|cellular calcium ion homeostasis;GO:0070588|calcium ion transmembrane transport;GO:0005886|plasma membrane;GO:0016021|integral component of membrane;GO:0005509|calcium ion binding;GO:0015369|calcium:proton antiporter activity	NA	2043	2064	2054	0.703297	7	GGGUGGGCCUGGACGAAGGCUG&GAGCUUUC-UUCAG-UCCACUC	0	0	NA	NA	NA	1	38.0243	4	0.185453	Output/short456/cleaveLand_result/t_plot/mdm-miR319b-5p_TRINITY_DN56_c0_g1_i19_2054_TPlot.pdf	0	38.0243	-Inf	down	6.9845e-10	7.47646e-10
mdm-miR319b-5p	TRINITY_DN56_c0_g1_i20	TRINITY_DN56_c0_g1	NA	NA	GO:0006814|sodium ion transport;GO:0006874|cellular calcium ion homeostasis;GO:0070588|calcium ion transmembrane transport;GO:0005886|plasma membrane;GO:0016021|integral component of membrane;GO:0005509|calcium ion binding;GO:0015369|calcium:proton antiporter activity	NA	1704	1725	1715	0.703297	7	GGGUGGGCCUGGACGAAGGCUG&GAGCUUUC-UUCAG-UCCACUC	0	0	NA	NA	NA	1	38.0243	4	0.192532	Output/short456/cleaveLand_result/t_plot/mdm-miR319b-5p_TRINITY_DN56_c0_g1_i20_1715_TPlot.pdf	0	38.0243	-Inf	down	6.9845e-10	7.47646e-10
mdm-miR319b-5p	TRINITY_DN56_c0_g1_i8	TRINITY_DN56_c0_g1	NA	NA	GO:0006814|sodium ion transport;GO:0006874|cellular calcium ion homeostasis;GO:0070588|calcium ion transmembrane transport;GO:0005886|plasma membrane;GO:0016021|integral component of membrane;GO:0005509|calcium ion binding;GO:0015369|calcium:proton antiporter activity	NA	3303	3324	3314	0.703297	7	GGGUGGGCCUGGACGAAGGCUG&GAGCUUUC-UUCAG-UCCACUC	0	0	NA	NA	NA	1	38.0243	4	0.19573	Output/short456/cleaveLand_result/t_plot/mdm-miR319b-5p_TRINITY_DN56_c0_g1_i8_3314_TPlot.pdf	0	38.0243	-Inf	down	6.9845e-10	7.47646e-10
mdm-miR319b-5p	TRINITY_DN6097_c0_g1_i1	TRINITY_DN6097_c0_g1	NA	NA	GO:0006986|response to unfolded protein;GO:0009408|response to heat;GO:0034605|cellular response to heat;GO:0043335|protein unfolding;GO:0045727|positive regulation of translation;GO:0071456|cellular response to hypoxia;GO:0005634|nucleus;GO:0005737|cytoplasm;GO:0005829|cytosol;GO:0009570|chloroplast stroma;GO:0009941|chloroplast envelope;GO:0005524|ATP binding;GO:0016887|ATPase activity	NA	710	730	721	0.700549	6.5	GAGCUGGUUUGGGGAGGGCUC&GAGCUUUCUUCAGUCCA-CUC	33	2137.44	2	0.176545	Output/long789/cleaveLand_result/t_plot/mdm-miR319b-5p_TRINITY_DN6097_c0_g1_i1_721_TPlot.pdf	0	0	NA	NA	NA	2137.44	0	Inf	up	0	0
mdm-miR319b-5p	TRINITY_DN6097_c0_g1_i2	TRINITY_DN6097_c0_g1	NA	NA	GO:0006986|response to unfolded protein;GO:0009408|response to heat;GO:0034605|cellular response to heat;GO:0043335|protein unfolding;GO:0045727|positive regulation of translation;GO:0071456|cellular response to hypoxia;GO:0005634|nucleus;GO:0005737|cytoplasm;GO:0005829|cytosol;GO:0009570|chloroplast stroma;GO:0009941|chloroplast envelope;GO:0005524|ATP binding;GO:0016887|ATPase activity	NA	427	447	438	0.700549	6.5	GAGCUGGUUUGGGGAGGGCUC&GAGCUUUCUUCAGUCCA-CUC	19	1230.65	2	0.177699	Output/long789/cleaveLand_result/t_plot/mdm-miR319b-5p_TRINITY_DN6097_c0_g1_i2_438_TPlot.pdf	0	0	NA	NA	NA	1230.65	0	Inf	up	0	0
mdm-miR319b-5p	TRINITY_DN6097_c0_g1_i5	TRINITY_DN6097_c0_g1	NA	NA	GO:0006986|response to unfolded protein;GO:0009408|response to heat;GO:0034605|cellular response to heat;GO:0043335|protein unfolding;GO:0045727|positive regulation of translation;GO:0071456|cellular response to hypoxia;GO:0005634|nucleus;GO:0005737|cytoplasm;GO:0005829|cytosol;GO:0009570|chloroplast stroma;GO:0009941|chloroplast envelope;GO:0005524|ATP binding;GO:0016887|ATPase activity	NA	621	641	632	0.700549	6.5	GAGCUGGUUUGGGGAGGGCUC&GAGCUUUCUUCAGUCCA-CUC	23	1489.73	2	0.185161	Output/long789/cleaveLand_result/t_plot/mdm-miR319b-5p_TRINITY_DN6097_c0_g1_i5_632_TPlot.pdf	0	0	NA	NA	NA	1489.73	0	Inf	up	0	0
mdm-miR396f	TRINITY_DN178_c0_g1_i16	TRINITY_DN178_c0_g1	NA	NA	GO:0009555|pollen development;GO:0009860|pollen tube growth;GO:0052325|cell wall pectin biosynthetic process;GO:0000139|Golgi membrane;GO:0005794|Golgi apparatus;GO:0016021|integral component of membrane;GO:0090406|pollen tube;GO:0047262|polygalacturonate 4-alpha-galacturonosyltransferase activity	NA	2557	2576	2567	0.721311	5	CAGUUCUUG-AAGCUGUGGAA&UUCCACGGCUUUCUUGAACUG	1	64.771	4	0.0908387	Output/long789/cleaveLand_result/t_plot/mdm-miR396f_TRINITY_DN178_c0_g1_i16_2567_TPlot.pdf	0	0	NA	NA	NA	64.771	0	Inf	up	8.4037e-16	1.0516e-15
mdm-miR396f	TRINITY_DN178_c0_g1_i5	TRINITY_DN178_c0_g1	NA	NA	GO:0009555|pollen development;GO:0009860|pollen tube growth;GO:0048358|mucilage pectin biosynthetic process;GO:0052325|cell wall pectin biosynthetic process;GO:0000139|Golgi membrane;GO:0005794|Golgi apparatus;GO:0016021|integral component of membrane;GO:0090406|pollen tube;GO:0047262|polygalacturonate 4-alpha-galacturonosyltransferase activity	NA	1282	1301	1292	0.721311	5	CAGUUCUUG-AAGCUGUGGAA&UUCCACGGCUUUCUUGAACUG	1	64.771	4	0.0902475	Output/long789/cleaveLand_result/t_plot/mdm-miR396f_TRINITY_DN178_c0_g1_i5_1292_TPlot.pdf	0	0	NA	NA	NA	64.771	0	Inf	up	8.4037e-16	1.0516e-15
mdm-miR396f	TRINITY_DN2142_c0_g1_i17	TRINITY_DN2142_c0_g1	NA	NA	GO:0006457|protein folding;GO:0005737|cytoplasm;GO:0005524|ATP binding;GO:0051082|unfolded protein binding	ko04141;ko04626	1505	1525	1516	0.740437	6	GAGAGCAAGAAGGCUGUGGAG&UUCCACGGCUUUCUUGAACUG	354	22928.9	2	0.0657594	Output/long789/cleaveLand_result/t_plot/mdm-miR396f_TRINITY_DN2142_c0_g1_i17_1516_TPlot.pdf	738	28061.9	2	0.0727217	Output/short456/cleaveLand_result/t_plot/mdm-miR396f_TRINITY_DN2142_c0_g1_i17_1516_TPlot.pdf	22928.9	28061.9	-0.291443	down	0	0
mdm-miR396f	TRINITY_DN2142_c0_g1_i20	TRINITY_DN2142_c0_g1	NA	NA	GO:0006457|protein folding;GO:0034605|cellular response to heat;GO:0050821|protein stabilization;GO:0005737|cytoplasm;GO:0005829|cytosol;GO:0005886|plasma membrane;GO:0009986|cell surface;GO:0032991|protein-containing complex;GO:0048471|perinuclear region of cytoplasm;GO:0005524|ATP binding;GO:0051082|unfolded protein binding	ko04141;ko04626	761	781	772	0.740437	6	GAGAGCAAGAAGGCUGUGGAG&UUCCACGGCUUUCUUGAACUG	314	20338.1	2	0.065104	Output/long789/cleaveLand_result/t_plot/mdm-miR396f_TRINITY_DN2142_c0_g1_i20_772_TPlot.pdf	700	26617	2	0.0719997	Output/short456/cleaveLand_result/t_plot/mdm-miR396f_TRINITY_DN2142_c0_g1_i20_772_TPlot.pdf	20338.1	26617	-0.388162	down	0	0
mdm-miR396f	TRINITY_DN2142_c0_g1_i7	TRINITY_DN2142_c0_g1	NA	NA	GO:0006457|protein folding;GO:0005737|cytoplasm;GO:0005524|ATP binding;GO:0051082|unfolded protein binding	ko04141;ko04626	2088	2108	2099	0.740437	6	GAGAGCAAGAAGGCUGUGGAG&UUCCACGGCUUUCUUGAACUG	334	21633.5	2	0.0654317	Output/long789/cleaveLand_result/t_plot/mdm-miR396f_TRINITY_DN2142_c0_g1_i7_2099_TPlot.pdf	725	27567.6	2	0.0723607	Output/short456/cleaveLand_result/t_plot/mdm-miR396f_TRINITY_DN2142_c0_g1_i7_2099_TPlot.pdf	21633.5	27567.6	-0.349704	down	0	0
mdm-miR396f	TRINITY_DN8746_c0_g1_i1	TRINITY_DN8746_c0_g1	NA	NA	GO:0006351|transcription, DNA-templated;GO:0006355|regulation of transcription, DNA-templated;GO:0032502|developmental process;GO:0005634|nucleus;GO:0005524|ATP binding	NA	458	479	469	0.833333	4	UCGUUCAAGAAAGCCUGUGGAA&UUCCAC-GGCUUUCUUGAACUG	20	1295.42	0	0.00257242	Output/long789/cleaveLand_result/t_plot/mdm-miR396f_TRINITY_DN8746_c0_g1_i1_469_TPlot.pdf	15	570.364	0	0.00257876	Output/short456/cleaveLand_result/t_plot/mdm-miR396f_TRINITY_DN8746_c0_g1_i1_469_TPlot.pdf	1295.42	570.364	1.18347	up	2.7182e-63	9.66006e-63
mdm-miR396f	TRINITY_DN8746_c0_g1_i13	TRINITY_DN8746_c0_g1	NA	NA	GO:0006351|transcription, DNA-templated;GO:0006355|regulation of transcription, DNA-templated;GO:0032502|developmental process;GO:0005634|nucleus;GO:0005524|ATP binding	NA	458	479	469	0.833333	4	UCGUUCAAGAAAGCCUGUGGAA&UUCCAC-GGCUUUCUUGAACUG	26	1684.05	0	0.00247726	Output/long789/cleaveLand_result/t_plot/mdm-miR396f_TRINITY_DN8746_c0_g1_i13_469_TPlot.pdf	30	1140.73	3	0.0163284	Output/short456/cleaveLand_result/t_plot/mdm-miR396f_TRINITY_DN8746_c0_g1_i13_469_TPlot.pdf	1684.05	1140.73	0.561978	up	1.4572e-24	2.33759e-24
mdm-miR396f	TRINITY_DN8746_c0_g1_i14	TRINITY_DN8746_c0_g1	NA	NA	GO:0006351|transcription, DNA-templated;GO:0006355|regulation of transcription, DNA-templated;GO:0032502|developmental process;GO:0005634|nucleus;GO:0005524|ATP binding	NA	458	479	469	0.833333	4	UCGUUCAAGAAAGCCUGUGGAA&UUCCAC-GGCUUUCUUGAACUG	12	777.252	0	0.00266756	Output/long789/cleaveLand_result/t_plot/mdm-miR396f_TRINITY_DN8746_c0_g1_i14_469_TPlot.pdf	25	950.606	3	0.0175733	Output/short456/cleaveLand_result/t_plot/mdm-miR396f_TRINITY_DN8746_c0_g1_i14_469_TPlot.pdf	777.252	950.606	-0.290465	down	3.0164e-05	3.1701e-05
mdm-miR396f	TRINITY_DN8746_c0_g1_i16	TRINITY_DN8746_c0_g1	NA	NA	GO:0006351|transcription, DNA-templated;GO:0006355|regulation of transcription, DNA-templated;GO:0032502|developmental process;GO:0005634|nucleus;GO:0005524|ATP binding	NA	531	552	542	0.833333	4	CCGUUCAAGAAAGCCUGUGGAA&UUCCAC-GGCUUUCUUGAACUG	9	582.939	3	0.0150146	Output/long789/cleaveLand_result/t_plot/mdm-miR396f_TRINITY_DN8746_c0_g1_i16_542_TPlot.pdf	0	0	NA	NA	NA	582.939	0	Inf	up	0	0
mdm-miR396f	TRINITY_DN8746_c0_g1_i18	TRINITY_DN8746_c0_g1	NA	NA	GO:0006351|transcription, DNA-templated;GO:0006355|regulation of transcription, DNA-templated;GO:0032502|developmental process;GO:0005634|nucleus;GO:0005524|ATP binding	NA	1629	1650	1640	0.833333	4	CCGUUCAAGAAAGCCUGUGGAA&UUCCAC-GGCUUUCUUGAACUG	9	582.939	3	0.0173959	Output/long789/cleaveLand_result/t_plot/mdm-miR396f_TRINITY_DN8746_c0_g1_i18_1640_TPlot.pdf	0	0	NA	NA	NA	582.939	0	Inf	up	0	0
mdm-miR396f	TRINITY_DN8746_c0_g1_i19	TRINITY_DN8746_c0_g1	NA	NA	GO:0006351|transcription, DNA-templated;GO:0006355|regulation of transcription, DNA-templated;GO:0032502|developmental process;GO:0005634|nucleus;GO:0005524|ATP binding	NA	614	635	625	0.833333	4	CCGUUCAAGAAAGCCUGUGGAA&UUCCAC-GGCUUUCUUGAACUG	13	842.023	0	0.00200134	Output/long789/cleaveLand_result/t_plot/mdm-miR396f_TRINITY_DN8746_c0_g1_i19_625_TPlot.pdf	0	0	NA	NA	NA	842.023	0	Inf	up	0	0
mdm-miR396f	TRINITY_DN8746_c0_g1_i3	TRINITY_DN8746_c0_g1	NA	NA	GO:0006351|transcription, DNA-templated;GO:0006355|regulation of transcription, DNA-templated;GO:0032502|developmental process;GO:0005634|nucleus;GO:0005524|ATP binding	NA	458	479	469	0.833333	4	UCGUUCAAGAAAGCCUGUGGAA&UUCCAC-GGCUUUCUUGAACUG	17	1101.11	0	0.00228692	Output/long789/cleaveLand_result/t_plot/mdm-miR396f_TRINITY_DN8746_c0_g1_i3_469_TPlot.pdf	21	798.509	3	0.0150819	Output/short456/cleaveLand_result/t_plot/mdm-miR396f_TRINITY_DN8746_c0_g1_i3_469_TPlot.pdf	1101.11	798.509	0.463574	up	3.7558e-12	4.5759e-12
mdm-miR396f	TRINITY_DN8746_c0_g1_i7	TRINITY_DN8746_c0_g1	NA	NA	GO:0006351|transcription, DNA-templated;GO:0006355|regulation of transcription, DNA-templated;GO:0032502|developmental process;GO:0005634|nucleus;GO:0005524|ATP binding	NA	1712	1733	1723	0.833333	4	CCGUUCAAGAAAGCCUGUGGAA&UUCCAC-GGCUUUCUUGAACUG	9	582.939	3	0.0132248	Output/long789/cleaveLand_result/t_plot/mdm-miR396f_TRINITY_DN8746_c0_g1_i7_1723_TPlot.pdf	0	0	NA	NA	NA	582.939	0	Inf	up	0	0
mdm-miR477a	TRINITY_DN1270_c2_g1_i1	TRINITY_DN1270_c2_g1	NA	NA	NA	NA	56	74	65	0.704433	6.5	GAGGAGGUC--GAGGGAGAGA&ACUCUCCCUCAAGAGCUUCUC	11	712.481	3	0.162983	Output/long789/cleaveLand_result/t_plot/mdm-miR477a_TRINITY_DN1270_c2_g1_i1_65_TPlot.pdf	13	494.315	3	0.16986	Output/short456/cleaveLand_result/t_plot/mdm-miR477a_TRINITY_DN1270_c2_g1_i1_65_TPlot.pdf	712.481	494.315	0.527421	up	3.3415e-10	4.04977e-10
mdm-miR7122a	TRINITY_DN4432_c0_g1_i2	TRINITY_DN4432_c0_g1	NA	NA	NA	NA	71	92	83	0.789916	4	CGACCGUGAUUUCCCUGUUUAA&UUAUACAGAGAAAUCACGGUCG	0	0	NA	NA	NA	1	38.0243	4	0.00198182	Output/short456/cleaveLand_result/t_plot/mdm-miR7122a_TRINITY_DN4432_c0_g1_i2_83_TPlot.pdf	0	38.0243	-Inf	down	6.9845e-10	7.47646e-10
mdm-miR7122a	TRINITY_DN4432_c0_g1_i3	TRINITY_DN4432_c0_g1	NA	NA	NA	NA	71	92	83	0.789916	4	CGACCGUGAUUUCCCUGUUUAA&UUAUACAGAGAAAUCACGGUCG	3	194.313	1	0.000111878	Output/long789/cleaveLand_result/t_plot/mdm-miR7122a_TRINITY_DN4432_c0_g1_i3_83_TPlot.pdf	0	0	NA	NA	NA	194.313	0	Inf	up	3.6042e-44	8.09893e-44
mdm-miR7122a	TRINITY_DN4432_c0_g1_i4	TRINITY_DN4432_c0_g1	NA	NA	NA	NA	71	92	83	0.789916	4	CGACCGUGAUUUCCCUGUUUAA&UUAUACAGAGAAAUCACGGUCG	0	0	NA	NA	NA	1	38.0243	4	0.00158577	Output/short456/cleaveLand_result/t_plot/mdm-miR7122a_TRINITY_DN4432_c0_g1_i4_83_TPlot.pdf	0	38.0243	-Inf	down	6.9845e-10	7.47646e-10
mdm-miR7122a	TRINITY_DN4432_c0_g2_i1	TRINITY_DN4432_c0_g2	NA	NA	NA	NA	71	92	83	0.789916	4	CGACCGUGAUUUCCCUGUUUAA&UUAUACAGAGAAAUCACGGUCG	42	2720.38	0	0.000858208	Output/long789/cleaveLand_result/t_plot/mdm-miR7122a_TRINITY_DN4432_c0_g2_i1_83_TPlot.pdf	15	570.364	0	0.000860327	Output/short456/cleaveLand_result/t_plot/mdm-miR7122a_TRINITY_DN4432_c0_g2_i1_83_TPlot.pdf	2720.38	570.364	2.25386	up	0	0
mdm-miR7122a	TRINITY_DN4432_c0_g2_i4	TRINITY_DN4432_c0_g2	NA	NA	NA	NA	71	92	83	0.789916	4	CGACCGUGAUUUCCCUGUUUAA&UUAUACAGAGAAAUCACGGUCG	38	2461.3	0	0.000667559	Output/long789/cleaveLand_result/t_plot/mdm-miR7122a_TRINITY_DN4432_c0_g2_i4_83_TPlot.pdf	10	380.243	0	0.000669207	Output/short456/cleaveLand_result/t_plot/mdm-miR7122a_TRINITY_DN4432_c0_g2_i4_83_TPlot.pdf	2461.3	380.243	2.69443	up	0	0
mdm-miR7122a	TRINITY_DN4432_c0_g2_i5	TRINITY_DN4432_c0_g2	NA	NA	NA	NA	71	92	83	0.789916	4	CGACCGUGAUUUCCCUGUUUAA&UUAUACAGAGAAAUCACGGUCG	49	3173.78	0	0.0012394	Output/long789/cleaveLand_result/t_plot/mdm-miR7122a_TRINITY_DN4432_c0_g2_i5_83_TPlot.pdf	15	570.364	0	0.00124246	Output/short456/cleaveLand_result/t_plot/mdm-miR7122a_TRINITY_DN4432_c0_g2_i5_83_TPlot.pdf	3173.78	570.364	2.47625	up	0	0
mes-miR160c	TRINITY_DN3101_c0_g2_i1	TRINITY_DN3101_c0_g2	NA	NA	GO:0035344|hypoxanthine transport;GO:0098702|adenine import across plasma membrane;GO:0098710|guanine import across plasma membrane;GO:0098721|uracil import across plasma membrane;GO:0005886|plasma membrane;GO:0016021|integral component of membrane;GO:0015207|adenine transmembrane transporter activity;GO:0015208|guanine transmembrane transporter activity;GO:0015210|uracil transmembrane transporte…	NA	2394	2413	2405	0.665801	7	CGGCUCGAAGGGAGCC-GGCU&UGCCUGGCUCCCUGUAUGCCG	4	259.084	3	0.246178	Output/long789/cleaveLand_result/t_plot/mes-miR160c_TRINITY_DN3101_c0_g2_i1_2405_TPlot.pdf	88	3346.13	2	0.166189	Output/short456/cleaveLand_result/t_plot/mes-miR160c_TRINITY_DN3101_c0_g2_i1_2405_TPlot.pdf	259.084	3346.13	-3.691	down	0	0
mes-miR160c	TRINITY_DN3101_c0_g2_i2	TRINITY_DN3101_c0_g2	NA	NA	GO:0035344|hypoxanthine transport;GO:0098702|adenine import across plasma membrane;GO:0098710|guanine import across plasma membrane;GO:0098721|uracil import across plasma membrane;GO:0005886|plasma membrane;GO:0016021|integral component of membrane;GO:0015207|adenine transmembrane transporter activity;GO:0015208|guanine transmembrane transporter activity;GO:0015210|uracil transmembrane transporte…	NA	2316	2335	2327	0.665801	7	CGGCUCGAAGGGAGCC-GGCU&UGCCUGGCUCCCUGUAUGCCG	0	0	NA	NA	NA	84	3194.04	2	0.165864	Output/short456/cleaveLand_result/t_plot/mes-miR160c_TRINITY_DN3101_c0_g2_i2_2327_TPlot.pdf	0	3194.04	-Inf	down	0	0
mes-miR160c	TRINITY_DN73089_c0_g1_i1	TRINITY_DN73089_c0_g1	NA	NA	GO:0006355|regulation of transcription, DNA-templated;GO:0009734|auxin-activated signaling pathway;GO:0005634|nucleus;GO:0003677|DNA binding	NA	1587	1607	1598	0.809524	3	AAGCAUCCAGGGAGCCAGGCA&UGCCUGGCUCCCUGUAUGCCG	2	129.542	0	0.00238209	Output/long789/cleaveLand_result/t_plot/mes-miR160c_TRINITY_DN73089_c0_g1_i1_1598_TPlot.pdf	0	0	NA	NA	NA	129.542	0	Inf	up	5.1393e-30	9.14621e-30
mes-miR160c	TRINITY_DN73089_c0_g1_i2	TRINITY_DN73089_c0_g1	NA	NA	GO:0006355|regulation of transcription, DNA-templated;GO:0009734|auxin-activated signaling pathway;GO:0005634|nucleus;GO:0003677|DNA binding	NA	1587	1607	1598	0.809524	3	AAGCAUCCAGGGAGCCAGGCA&UGCCUGGCUCCCUGUAUGCCG	1	64.771	4	0.00744773	Output/long789/cleaveLand_result/t_plot/mes-miR160c_TRINITY_DN73089_c0_g1_i2_1598_TPlot.pdf	0	0	NA	NA	NA	64.771	0	Inf	up	8.4037e-16	1.0516e-15
mes-miR160c	TRINITY_DN7361_c0_g1_i13	TRINITY_DN7361_c0_g1	NA	NA	GO:0006355|regulation of transcription, DNA-templated;GO:0009734|auxin-activated signaling pathway;GO:0005634|nucleus;GO:0003677|DNA binding	NA	564	585	576	0.852814	2	CGAGCAUUCAGGGAGCCAGGCA&UGCCUGGCUCCCUGUAUGC-CG	0	0	NA	NA	NA	1	38.0243	4	0.00395971	Output/short456/cleaveLand_result/t_plot/mes-miR160c_TRINITY_DN7361_c0_g1_i13_576_TPlot.pdf	0	38.0243	-Inf	down	6.9845e-10	7.47646e-10
mes-miR160c	TRINITY_DN7361_c0_g1_i7	TRINITY_DN7361_c0_g1	NA	NA	GO:0006355|regulation of transcription, DNA-templated;GO:0009734|auxin-activated signaling pathway;GO:0005634|nucleus;GO:0003677|DNA binding	NA	1646	1667	1658	0.852814	2	CGAGCAUUCAGGGAGCCAGGCA&UGCCUGGCUCCCUGUAUGC-CG	0	0	NA	NA	NA	1	38.0243	4	0.00316903	Output/short456/cleaveLand_result/t_plot/mes-miR160c_TRINITY_DN7361_c0_g1_i7_1658_TPlot.pdf	0	38.0243	-Inf	down	6.9845e-10	7.47646e-10
mes-miR160c	TRINITY_DN7361_c0_g1_i9	TRINITY_DN7361_c0_g1	NA	NA	GO:0006355|regulation of transcription, DNA-templated;GO:0009734|auxin-activated signaling pathway;GO:0005634|nucleus;GO:0003677|DNA binding	NA	1646	1667	1658	0.852814	2	CGAGCAUUCAGGGAGCCAGGCA&UGCCUGGCUCCCUGUAUGC-CG	0	0	NA	NA	NA	1	38.0243	4	0.00356445	Output/short456/cleaveLand_result/t_plot/mes-miR160c_TRINITY_DN7361_c0_g1_i9_1658_TPlot.pdf	0	38.0243	-Inf	down	6.9845e-10	7.47646e-10
mes-miR160g	TRINITY_DN73089_c0_g1_i1	TRINITY_DN73089_c0_g1	NA	NA	GO:0006355|regulation of transcription, DNA-templated;GO:0009734|auxin-activated signaling pathway;GO:0005634|nucleus;GO:0003677|DNA binding	NA	1585	1607	1598	0.757085	5	AUAAGCAUCCAGGGAGCCAGGCA&UGCCUGGCUCCCUGUAUGCCAUC	2	129.542	0	0.00352348	Output/long789/cleaveLand_result/t_plot/mes-miR160g_TRINITY_DN73089_c0_g1_i1_1598_TPlot.pdf	0	0	NA	NA	NA	129.542	0	Inf	up	5.1393e-30	9.14621e-30
mes-miR160g	TRINITY_DN73089_c0_g1_i2	TRINITY_DN73089_c0_g1	NA	NA	GO:0006355|regulation of transcription, DNA-templated;GO:0009734|auxin-activated signaling pathway;GO:0005634|nucleus;GO:0003677|DNA binding	NA	1585	1607	1598	0.757085	5	AUAAGCAUCCAGGGAGCCAGGCA&UGCCUGGCUCCCUGUAUGCCAUC	1	64.771	4	0.0113115	Output/long789/cleaveLand_result/t_plot/mes-miR160g_TRINITY_DN73089_c0_g1_i2_1598_TPlot.pdf	0	0	NA	NA	NA	64.771	0	Inf	up	8.4037e-16	1.0516e-15
mes-miR160h	TRINITY_DN73089_c0_g1_i1	TRINITY_DN73089_c0_g1	NA	NA	GO:0006355|regulation of transcription, DNA-templated;GO:0009734|auxin-activated signaling pathway;GO:0005634|nucleus;GO:0003677|DNA binding	NA	1585	1607	1598	0.78903	5	AUAAGCAUCCAGGGAGCCAGGCA&UGCCUGGCUCCCUGUAUGCCAUU	2	129.542	0	0.00257242	Output/long789/cleaveLand_result/t_plot/mes-miR160h_TRINITY_DN73089_c0_g1_i1_1598_TPlot.pdf	0	0	NA	NA	NA	129.542	0	Inf	up	5.1393e-30	9.14621e-30
mes-miR160h	TRINITY_DN73089_c0_g1_i2	TRINITY_DN73089_c0_g1	NA	NA	GO:0006355|regulation of transcription, DNA-templated;GO:0009734|auxin-activated signaling pathway;GO:0005634|nucleus;GO:0003677|DNA binding	NA	1585	1607	1598	0.78903	5	AUAAGCAUCCAGGGAGCCAGGCA&UGCCUGGCUCCCUGUAUGCCAUU	1	64.771	4	0.00777029	Output/long789/cleaveLand_result/t_plot/mes-miR160h_TRINITY_DN73089_c0_g1_i2_1598_TPlot.pdf	0	0	NA	NA	NA	64.771	0	Inf	up	8.4037e-16	1.0516e-15
mes-miR160h	TRINITY_DN7361_c0_g1_i13	TRINITY_DN7361_c0_g1	NA	NA	GO:0006355|regulation of transcription, DNA-templated;GO:0009734|auxin-activated signaling pathway;GO:0005634|nucleus;GO:0003677|DNA binding	NA	562	585	576	0.78903	5	AACGAGCAUUCAGGGAGCCAGGCA&UGCCUGGCUCCCUGUAUGC-CAUU	0	0	NA	NA	NA	1	38.0243	4	0.0110477	Output/short456/cleaveLand_result/t_plot/mes-miR160h_TRINITY_DN7361_c0_g1_i13_576_TPlot.pdf	0	38.0243	-Inf	down	6.9845e-10	7.47646e-10
mes-miR160h	TRINITY_DN7361_c0_g1_i7	TRINITY_DN7361_c0_g1	NA	NA	GO:0006355|regulation of transcription, DNA-templated;GO:0009734|auxin-activated signaling pathway;GO:0005634|nucleus;GO:0003677|DNA binding	NA	1644	1667	1658	0.78903	5	AACGAGCAUUCAGGGAGCCAGGCA&UGCCUGGCUCCCUGUAUGC-CAUU	0	0	NA	NA	NA	1	38.0243	4	0.00869067	Output/short456/cleaveLand_result/t_plot/mes-miR160h_TRINITY_DN7361_c0_g1_i7_1658_TPlot.pdf	0	38.0243	-Inf	down	6.9845e-10	7.47646e-10
mes-miR160h	TRINITY_DN7361_c0_g1_i9	TRINITY_DN7361_c0_g1	NA	NA	GO:0006355|regulation of transcription, DNA-templated;GO:0009734|auxin-activated signaling pathway;GO:0005634|nucleus;GO:0003677|DNA binding	NA	1644	1667	1658	0.78903	5	AACGAGCAUUCAGGGAGCCAGGCA&UGCCUGGCUCCCUGUAUGC-CAUU	0	0	NA	NA	NA	1	38.0243	4	0.0098699	Output/short456/cleaveLand_result/t_plot/mes-miR160h_TRINITY_DN7361_c0_g1_i9_1658_TPlot.pdf	0	38.0243	-Inf	down	6.9845e-10	7.47646e-10
mes-miR397	TRINITY_DN6927_c0_g1_i10	TRINITY_DN6927_c0_g1	NA	NA	NA	NA	1271	1291	1282	0.725948	5	AUAUCAAUCGCUGCAUUCGAG&UUUGAGUGCAGCG-UUGAUGA	1	64.771	4	0.162065	Output/long789/cleaveLand_result/t_plot/mes-miR397_TRINITY_DN6927_c0_g1_i10_1282_TPlot.pdf	0	0	NA	NA	NA	64.771	0	Inf	up	8.4037e-16	1.0516e-15
mes-miR397	TRINITY_DN6927_c0_g1_i16	TRINITY_DN6927_c0_g1	NA	NA	NA	NA	1271	1291	1282	0.725948	5	AUAUCAAUCGCUGCAUUCGAG&UUUGAGUGCAGCG-UUGAUGA	1	64.771	4	0.158243	Output/long789/cleaveLand_result/t_plot/mes-miR397_TRINITY_DN6927_c0_g1_i16_1282_TPlot.pdf	0	0	NA	NA	NA	64.771	0	Inf	up	8.4037e-16	1.0516e-15
mes-miR477d	TRINITY_DN1270_c2_g1_i1	TRINITY_DN1270_c2_g1	NA	NA	NA	NA	56	73	65	0.67561	6	GAGGAGGUC--GAGGGAGAG&CUCUCCCUCAAGGGCUUCUC	11	712.481	3	0.429686	Output/long789/cleaveLand_result/t_plot/mes-miR477d_TRINITY_DN1270_c2_g1_i1_65_TPlot.pdf	13	494.315	3	0.444346	Output/short456/cleaveLand_result/t_plot/mes-miR477d_TRINITY_DN1270_c2_g1_i1_65_TPlot.pdf	712.481	494.315	0.527421	up	3.3415e-10	4.04977e-10
mes-miR530b	TRINITY_DN2485_c0_g1_i2	TRINITY_DN2485_c0_g1	NA	NA	GO:0006270|DNA replication initiation;GO:0007049|cell cycle;GO:0005634|nucleus;GO:0042555|MCM complex;GO:0003677|DNA binding;GO:0003678|DNA helicase activity;GO:0005524|ATP binding;GO:0046872|metal ion binding	ko03030	828	848	839	0.807895	7	GAUGGUGCAGGUGCAGACGCU&UGCAUUUGCACCUGCACCUUA	2	129.542	3	0.0604265	Output/long789/cleaveLand_result/t_plot/mes-miR530b_TRINITY_DN2485_c0_g1_i2_839_TPlot.pdf	1	38.0243	4	0.0400422	Output/short456/cleaveLand_result/t_plot/mes-miR530b_TRINITY_DN2485_c0_g1_i2_839_TPlot.pdf	129.542	38.0243	1.76843	up	1.5473e-12	1.90526e-12
mes-miR530b	TRINITY_DN2485_c0_g1_i28	TRINITY_DN2485_c0_g1	NA	NA	GO:0006270|DNA replication initiation;GO:0007049|cell cycle;GO:0005634|nucleus;GO:0042555|MCM complex;GO:0003677|DNA binding;GO:0003678|DNA helicase activity;GO:0005524|ATP binding;GO:0046872|metal ion binding	ko03030	828	848	839	0.807895	7	GAUGGUGCAGGUGCAGACGCU&UGCAUUUGCACCUGCACCUUA	6	388.626	2	0.0347934	Output/long789/cleaveLand_result/t_plot/mes-miR530b_TRINITY_DN2485_c0_g1_i28_839_TPlot.pdf	1	38.0243	4	0.0392802	Output/short456/cleaveLand_result/t_plot/mes-miR530b_TRINITY_DN2485_c0_g1_i28_839_TPlot.pdf	388.626	38.0243	3.35339	up	1.2452e-64	4.56573e-64
mes-miR530b	TRINITY_DN2485_c0_g1_i34	TRINITY_DN2485_c0_g1	NA	NA	GO:0006270|DNA replication initiation;GO:0007049|cell cycle;GO:0005634|nucleus;GO:0042555|MCM complex;GO:0003677|DNA binding;GO:0003678|DNA helicase activity;GO:0005524|ATP binding;GO:0046872|metal ion binding	ko03030	804	824	815	0.807895	7	GAUGGUGCAGGUGCAGACGCU&UGCAUUUGCACCUGCACCUUA	6	388.626	2	0.0378344	Output/long789/cleaveLand_result/t_plot/mes-miR530b_TRINITY_DN2485_c0_g1_i34_815_TPlot.pdf	0	0	NA	NA	NA	388.626	0	Inf	up	1.5868e-86	7.5422e-86
mes-miR530b	TRINITY_DN2485_c0_g1_i35	TRINITY_DN2485_c0_g1	NA	NA	GO:0000727|double-strand break repair via break-induced replication;GO:0006267|pre-replicative complex assembly involved in nuclear cell cycle DNA replication;GO:0006268|DNA unwinding involved in DNA replication;GO:0006270|DNA replication initiation;GO:1902969|mitotic DNA replication;GO:0000347|THO complex;GO:0005634|nucleus;GO:0042555|MCM complex;GO:0003678|DNA helicase activity;GO:0003688|DNA r…	ko03030	2310	2330	2321	0.807895	7	GAUGGUGCAGGUGCAGACGCU&UGCAUUUGCACCUGCACCUUA	4	259.084	3	0.0632651	Output/long789/cleaveLand_result/t_plot/mes-miR530b_TRINITY_DN2485_c0_g1_i35_2321_TPlot.pdf	0	0	NA	NA	NA	259.084	0	Inf	up	2.672e-58	8.29613e-58
mes-miR530b	TRINITY_DN2485_c0_g1_i4	TRINITY_DN2485_c0_g1	NA	NA	GO:0006270|DNA replication initiation;GO:0007049|cell cycle;GO:0005634|nucleus;GO:0042555|MCM complex;GO:0003677|DNA binding;GO:0003678|DNA helicase activity;GO:0005524|ATP binding;GO:0046872|metal ion binding	ko03030	804	824	815	0.807895	7	GAUGGUGCAGGUGCAGACGCU&UGCAUUUGCACCUGCACCUUA	3	194.313	3	0.0626981	Output/long789/cleaveLand_result/t_plot/mes-miR530b_TRINITY_DN2485_c0_g1_i4_815_TPlot.pdf	3	114.073	3	0.0655081	Output/short456/cleaveLand_result/t_plot/mes-miR530b_TRINITY_DN2485_c0_g1_i4_815_TPlot.pdf	194.313	114.073	0.768429	up	4.8864e-06	5.18255e-06
mes-miR530b	TRINITY_DN2485_c0_g1_i7	TRINITY_DN2485_c0_g1	NA	NA	GO:0006270|DNA replication initiation;GO:0007049|cell cycle;GO:0005634|nucleus;GO:0042555|MCM complex;GO:0003677|DNA binding;GO:0003678|DNA helicase activity;GO:0005524|ATP binding;GO:0046872|metal ion binding	ko03030	631	651	642	0.807895	7	GAUGGUGCAGGUGCAGACGCU&UGCAUUUGCACCUGCACCUUA	3	194.313	3	0.0587193	Output/long789/cleaveLand_result/t_plot/mes-miR530b_TRINITY_DN2485_c0_g1_i7_642_TPlot.pdf	0	0	NA	NA	NA	194.313	0	Inf	up	3.6042e-44	8.09893e-44
mtr-miR164d	TRINITY_DN3244_c1_g1_i15	TRINITY_DN3244_c1_g1	NA	NA	GO:2001142|nicotinate transport;GO:2001143|N-methylnicotinate transport;GO:0005886|plasma membrane;GO:0016021|integral component of membrane;GO:0005524|ATP binding;GO:0090416|nicotinate transmembrane transporter activity;GO:0090417|N-methylnicotinate transmembrane transporter activity	NA	2142	2162	2153	0.662005	6	UGUAUGUGUACUGCUUUUCCC&UGGAGAAGCAGGGCACAUGCU	0	0	NA	NA	NA	1	38.0243	4	0.176027	Output/short456/cleaveLand_result/t_plot/mtr-miR164d_TRINITY_DN3244_c1_g1_i15_2153_TPlot.pdf	0	38.0243	-Inf	down	6.9845e-10	7.47646e-10
mtr-miR164d	TRINITY_DN3244_c1_g1_i16	TRINITY_DN3244_c1_g1	NA	NA	GO:2001142|nicotinate transport;GO:2001143|N-methylnicotinate transport;GO:0005886|plasma membrane;GO:0016021|integral component of membrane;GO:0005524|ATP binding;GO:0090416|nicotinate transmembrane transporter activity;GO:0090417|N-methylnicotinate transmembrane transporter activity	NA	1798	1818	1809	0.662005	6	UGUAUGUGUACUGCUUUUCCC&UGGAGAAGCAGGGCACAUGCU	0	0	NA	NA	NA	3	114.073	1	0.0106373	Output/short456/cleaveLand_result/t_plot/mtr-miR164d_TRINITY_DN3244_c1_g1_i16_1809_TPlot.pdf	0	114.073	-Inf	down	1.252e-26	2.10489e-26
mtr-miR164d	TRINITY_DN3244_c1_g1_i21	TRINITY_DN3244_c1_g1	NA	NA	GO:2001142|nicotinate transport;GO:2001143|N-methylnicotinate transport;GO:0005886|plasma membrane;GO:0016021|integral component of membrane;GO:0005524|ATP binding;GO:0090416|nicotinate transmembrane transporter activity;GO:0090417|N-methylnicotinate transmembrane transporter activity	NA	1545	1565	1556	0.662005	6	UGUAUGUGUACUGCUUUUCCC&UGGAGAAGCAGGGCACAUGCU	0	0	NA	NA	NA	1	38.0243	4	0.184483	Output/short456/cleaveLand_result/t_plot/mtr-miR164d_TRINITY_DN3244_c1_g1_i21_1556_TPlot.pdf	0	38.0243	-Inf	down	6.9845e-10	7.47646e-10
mtr-miR164d	TRINITY_DN3244_c1_g1_i24	TRINITY_DN3244_c1_g1	NA	NA	GO:2001142|nicotinate transport;GO:2001143|N-methylnicotinate transport;GO:0005886|plasma membrane;GO:0016021|integral component of membrane;GO:0005524|ATP binding;GO:0090416|nicotinate transmembrane transporter activity;GO:0090417|N-methylnicotinate transmembrane transporter activity	NA	1763	1783	1774	0.662005	6	UGUAUGUGUACUGCUUUUCCC&UGGAGAAGCAGGGCACAUGCU	0	0	NA	NA	NA	1	38.0243	4	0.180591	Output/short456/cleaveLand_result/t_plot/mtr-miR164d_TRINITY_DN3244_c1_g1_i24_1774_TPlot.pdf	0	38.0243	-Inf	down	6.9845e-10	7.47646e-10
mtr-miR164d	TRINITY_DN3244_c1_g1_i32	TRINITY_DN3244_c1_g1	NA	NA	GO:2001142|nicotinate transport;GO:2001143|N-methylnicotinate transport;GO:0005886|plasma membrane;GO:0016021|integral component of membrane;GO:0005524|ATP binding;GO:0090416|nicotinate transmembrane transporter activity;GO:0090417|N-methylnicotinate transmembrane transporter activity	NA	1798	1818	1809	0.662005	6	UGUAUGUGUACUGCUUUUCCC&UGGAGAAGCAGGGCACAUGCU	0	0	NA	NA	NA	1	38.0243	4	0.178312	Output/short456/cleaveLand_result/t_plot/mtr-miR164d_TRINITY_DN3244_c1_g1_i32_1809_TPlot.pdf	0	38.0243	-Inf	down	6.9845e-10	7.47646e-10
mtr-miR164d	TRINITY_DN3244_c1_g1_i37	TRINITY_DN3244_c1_g1	NA	NA	GO:2001142|nicotinate transport;GO:2001143|N-methylnicotinate transport;GO:0005886|plasma membrane;GO:0016021|integral component of membrane;GO:0005524|ATP binding;GO:0090416|nicotinate transmembrane transporter activity;GO:0090417|N-methylnicotinate transmembrane transporter activity	NA	1580	1600	1591	0.662005	6	UGUAUGUGUACUGCUUUUCCC&UGGAGAAGCAGGGCACAUGCU	0	0	NA	NA	NA	1	38.0243	4	0.172751	Output/short456/cleaveLand_result/t_plot/mtr-miR164d_TRINITY_DN3244_c1_g1_i37_1591_TPlot.pdf	0	38.0243	-Inf	down	6.9845e-10	7.47646e-10
mtr-miR164d	TRINITY_DN3244_c1_g1_i7	TRINITY_DN3244_c1_g1	NA	NA	GO:2001142|nicotinate transport;GO:2001143|N-methylnicotinate transport;GO:0005886|plasma membrane;GO:0016021|integral component of membrane;GO:0005524|ATP binding;GO:0090416|nicotinate transmembrane transporter activity;GO:0090417|N-methylnicotinate transmembrane transporter activity	NA	2059	2079	2070	0.662005	6	UGUAUGUGUACUGCUUUUCCC&UGGAGAAGCAGGGCACAUGCU	0	0	NA	NA	NA	2	76.0485	3	0.263492	Output/short456/cleaveLand_result/t_plot/mtr-miR164d_TRINITY_DN3244_c1_g1_i7_2070_TPlot.pdf	0	76.0485	-Inf	down	2.7637e-18	4.06116e-18
mtr-miR2655b	TRINITY_DN16680_c0_g2_i11	TRINITY_DN16680_c0_g2	NA	NA	NA	NA	153	174	164	0.821317	5.5	GAAAGUUAGGGGAUCGAAGACG&CGUUUU-GGUCCCUUAACUUUA	0	0	NA	NA	NA	2	76.0485	3	0.0655081	Output/short456/cleaveLand_result/t_plot/mtr-miR2655b_TRINITY_DN16680_c0_g2_i11_164_TPlot.pdf	0	76.0485	-Inf	down	2.7637e-18	4.06116e-18
mtr-miR2655b	TRINITY_DN16680_c0_g2_i4	TRINITY_DN16680_c0_g2	NA	NA	NA	NA	466	487	477	0.821317	5.5	GAAAGUUAGGGGAUCGAAGACG&CGUUUU-GGUCCCUUAACUUUA	0	0	NA	NA	NA	1	38.0243	4	0.0430844	Output/short456/cleaveLand_result/t_plot/mtr-miR2655b_TRINITY_DN16680_c0_g2_i4_477_TPlot.pdf	0	38.0243	-Inf	down	6.9845e-10	7.47646e-10
mtr-miR2655b	TRINITY_DN21659_c0_g1_i5	TRINITY_DN21659_c0_g1	NA	NA	NA	NA	407	428	418	0.808777	6	GAAAGUUGGGGGAUCGAAGACG&CGUUUU-GGUCCCUUAACUUUA	0	0	NA	NA	NA	1	38.0243	4	0.0551568	Output/short456/cleaveLand_result/t_plot/mtr-miR2655b_TRINITY_DN21659_c0_g1_i5_418_TPlot.pdf	0	38.0243	-Inf	down	6.9845e-10	7.47646e-10
mtr-miR5209	TRINITY_DN6066_c0_g1_i8	TRINITY_DN6066_c0_g1	NA	NA	GO:0016787|hydrolase activity;GO:0080030|methyl indole-3-acetate esterase activity	NA	315	335	326	0.689394	7	AUCGAAUC-UGCUGCCUCCUCU&CGAGGAGGCGGUAUUGUUUGAA	0	0	NA	NA	NA	1	38.0243	4	0.234948	Output/short456/cleaveLand_result/t_plot/mtr-miR5209_TRINITY_DN6066_c0_g1_i8_326_TPlot.pdf	0	38.0243	-Inf	down	6.9845e-10	7.47646e-10
nta-miR397	TRINITY_DN6927_c0_g1_i10	TRINITY_DN6927_c0_g1	NA	NA	NA	NA	1271	1291	1282	0.769006	4.5	AUAUCAAUCGCUGCAUUCGAG&AUUGAGUGCAGCG-UUGAUGU	1	64.771	4	0.0595812	Output/long789/cleaveLand_result/t_plot/nta-miR397_TRINITY_DN6927_c0_g1_i10_1282_TPlot.pdf	0	0	NA	NA	NA	64.771	0	Inf	up	8.4037e-16	1.0516e-15
nta-miR397	TRINITY_DN6927_c0_g1_i16	TRINITY_DN6927_c0_g1	NA	NA	NA	NA	1271	1291	1282	0.769006	4.5	AUAUCAAUCGCUGCAUUCGAG&AUUGAGUGCAGCG-UUGAUGU	1	64.771	4	0.0583578	Output/long789/cleaveLand_result/t_plot/nta-miR397_TRINITY_DN6927_c0_g1_i16_1282_TPlot.pdf	0	0	NA	NA	NA	64.771	0	Inf	up	8.4037e-16	1.0516e-15
osa-miR156l-5p	TRINITY_DN17771_c0_g1_i1	TRINITY_DN17771_c0_g1	NA	NA	NA	NA	12	32	23	0.859416	3.5	CGUGCUCUCUCUCUUCUGUCA&CGACAGAAGAGAGUGAGCAUA	3	194.313	3	0.0227329	Output/long789/cleaveLand_result/t_plot/osa-miR156l-5p_TRINITY_DN17771_c0_g1_i1_23_TPlot.pdf	0	0	NA	NA	NA	194.313	0	Inf	up	3.6042e-44	8.09893e-44
osa-miR156l-5p	TRINITY_DN6217_c0_g1_i3	TRINITY_DN6217_c0_g1	NA	NA	NA	NA	273	293	284	0.801061	4.5	CGUGCUCUCUCUCCUCUGUCG&CGACAGAAGAGAGUGAGCAUA	4	259.084	3	0.0385705	Output/long789/cleaveLand_result/t_plot/osa-miR156l-5p_TRINITY_DN6217_c0_g1_i3_284_TPlot.pdf	1	38.0243	4	0.0254595	Output/short456/cleaveLand_result/t_plot/osa-miR156l-5p_TRINITY_DN6217_c0_g1_i3_284_TPlot.pdf	259.084	38.0243	2.76843	up	1.1756e-37	2.42901e-37
osa-miR156l-5p	TRINITY_DN6217_c0_g1_i7	TRINITY_DN6217_c0_g1	NA	NA	NA	NA	273	293	284	0.801061	4.5	CGUGCUCUCUCUCCUCUGUCG&CGACAGAAGAGAGUGAGCAUA	1	64.771	4	0.0205868	Output/long789/cleaveLand_result/t_plot/osa-miR156l-5p_TRINITY_DN6217_c0_g1_i7_284_TPlot.pdf	1	38.0243	4	0.0250728	Output/short456/cleaveLand_result/t_plot/osa-miR156l-5p_TRINITY_DN6217_c0_g1_i7_284_TPlot.pdf	64.771	38.0243	0.768429	up	0.0083365	0.00847593
osa-miR156l-5p	TRINITY_DN6217_c0_g1_i8	TRINITY_DN6217_c0_g1	NA	NA	NA	NA	273	293	284	0.801061	4.5	CGUGCUCUCUCUCCUCUGUCG&CGACAGAAGAGAGUGAGCAUA	3	194.313	3	0.0391521	Output/long789/cleaveLand_result/t_plot/osa-miR156l-5p_TRINITY_DN6217_c0_g1_i8_284_TPlot.pdf	1	38.0243	4	0.0258461	Output/short456/cleaveLand_result/t_plot/osa-miR156l-5p_TRINITY_DN6217_c0_g1_i8_284_TPlot.pdf	194.313	38.0243	2.35339	up	1.1354e-24	1.84702e-24
osa-miR156l-5p	TRINITY_DN66807_c0_g1_i2	TRINITY_DN66807_c0_g1	NA	NA	GO:0009651|response to salt stress;GO:0010182|sugar mediated signaling pathway;GO:0005634|nucleus;GO:0005739|mitochondrion;GO:0004672|protein kinase activity;GO:0004712|protein serine/threonine/tyrosine kinase activity;GO:0005524|ATP binding;GO:0106310|protein serine kinase activity;GO:0106311|protein threonine kinase activity	NA	2384	2405	2395	0.679045	6	GAUGUUUACUCUUUUGCUGUCA&CGACAG-AAGAGAGUGAGCAUA	5	323.855	3	0.258843	Output/long789/cleaveLand_result/t_plot/osa-miR156l-5p_TRINITY_DN66807_c0_g1_i2_2395_TPlot.pdf	0	0	NA	NA	NA	323.855	0	Inf	up	2.0406e-72	7.88259e-72
osa-miR156l-5p	TRINITY_DN9504_c0_g1_i1	TRINITY_DN9504_c0_g1	NA	NA	GO:0005886|plasma membrane;GO:0016021|integral component of membrane;GO:0005524|ATP binding;GO:0106310|protein serine kinase activity;GO:0106311|protein threonine kinase activity	NA	1946	1966	1957	0.859416	3.5	CGUGCUCUCUCUCUUCUGUCA&CGACAGAAGAGAGUGAGCAUA	1	64.771	4	0.0109901	Output/long789/cleaveLand_result/t_plot/osa-miR156l-5p_TRINITY_DN9504_c0_g1_i1_1957_TPlot.pdf	0	0	NA	NA	NA	64.771	0	Inf	up	8.4037e-16	1.0516e-15
osa-miR156l-5p	TRINITY_DN9504_c0_g1_i11	TRINITY_DN9504_c0_g1	NA	NA	GO:0005886|plasma membrane;GO:0016021|integral component of membrane;GO:0005524|ATP binding;GO:0106310|protein serine kinase activity;GO:0106311|protein threonine kinase activity	NA	1729	1749	1740	0.859416	3.5	CGUGCUCUCUCUCUUCUGUCA&CGACAGAAGAGAGUGAGCAUA	3	194.313	3	0.0209571	Output/long789/cleaveLand_result/t_plot/osa-miR156l-5p_TRINITY_DN9504_c0_g1_i11_1740_TPlot.pdf	0	0	NA	NA	NA	194.313	0	Inf	up	3.6042e-44	8.09893e-44
osa-miR156l-5p	TRINITY_DN9504_c0_g1_i6	TRINITY_DN9504_c0_g1	NA	NA	GO:0005886|plasma membrane;GO:0016021|integral component of membrane;GO:0005524|ATP binding;GO:0106310|protein serine kinase activity;GO:0106311|protein threonine kinase activity	NA	813	833	824	0.859416	3.5	CGUGCUCUCUCUCUUCUGUCA&CGACAGAAGAGAGUGAGCAUA	3	194.313	3	0.0215494	Output/long789/cleaveLand_result/t_plot/osa-miR156l-5p_TRINITY_DN9504_c0_g1_i6_824_TPlot.pdf	0	0	NA	NA	NA	194.313	0	Inf	up	3.6042e-44	8.09893e-44
osa-miR166b-5p	TRINITY_DN60803_c0_g1_i1	TRINITY_DN60803_c0_g1	NA	NA	GO:0006914|autophagy;GO:0015031|protein transport;GO:0051258|protein polymerization;GO:0005737|cytoplasm;GO:0005773|vacuole;GO:0008270|zinc ion binding;GO:0043130|ubiquitin binding	NA	1121	1141	1132	0.780093	5.5	CCUCGAGCCAGAUGAUUUUCC&GGAAUGUUGUCUGGCUCGGGG	0	0	NA	NA	NA	1	38.0243	4	0.0118322	Output/short456/cleaveLand_result/t_plot/osa-miR166b-5p_TRINITY_DN60803_c0_g1_i1_1132_TPlot.pdf	0	38.0243	-Inf	down	6.9845e-10	7.47646e-10
osa-miR167a-5p	TRINITY_DN8922_c0_g2_i1	TRINITY_DN8922_c0_g2	NA	NA	GO:0006997|nucleus organization;GO:0097298|regulation of nucleus size;GO:0005634|nucleus;GO:0005635|nuclear envelope;GO:0005652|nuclear lamina;GO:0005654|nucleoplasm;GO:0005739|mitochondrion;GO:0005829|cytosol;GO:0031965|nuclear membrane;GO:0034399|nuclear periphery	NA	5675	5694	5686	0.652956	7	GAGAUCAUGCUGG-AGACUCA&UGAAGCUGCCAGCAUGAUCUA	12	777.252	2	0.191422	Output/long789/cleaveLand_result/t_plot/osa-miR167a-5p_TRINITY_DN8922_c0_g2_i1_5686_TPlot.pdf	2	76.0485	3	0.318677	Output/short456/cleaveLand_result/t_plot/osa-miR167a-5p_TRINITY_DN8922_c0_g2_i1_5686_TPlot.pdf	777.252	76.0485	3.35339	up	0	0
osa-miR167a-5p	TRINITY_DN8922_c0_g2_i4	TRINITY_DN8922_c0_g2	NA	NA	GO:0006997|nucleus organization;GO:0097298|regulation of nucleus size;GO:0005634|nucleus;GO:0005635|nuclear envelope;GO:0005652|nuclear lamina;GO:0005654|nucleoplasm;GO:0005739|mitochondrion;GO:0005829|cytosol;GO:0031965|nuclear membrane;GO:0034399|nuclear periphery	NA	4490	4509	4501	0.652956	7	GAGAUCAUGCUGG-AGACUCA&UGAAGCUGCCAGCAUGAUCUA	8	518.168	2	0.194535	Output/long789/cleaveLand_result/t_plot/osa-miR167a-5p_TRINITY_DN8922_c0_g2_i4_4501_TPlot.pdf	4	152.097	3	0.323406	Output/short456/cleaveLand_result/t_plot/osa-miR167a-5p_TRINITY_DN8922_c0_g2_i4_4501_TPlot.pdf	518.168	152.097	1.76843	up	2.0885e-45	6.07611e-45
osa-miR167a-5p	TRINITY_DN8922_c0_g2_i8	TRINITY_DN8922_c0_g2	NA	NA	GO:0006997|nucleus organization;GO:0097298|regulation of nucleus size;GO:0005634|nucleus;GO:0005635|nuclear envelope;GO:0005652|nuclear lamina;GO:0005654|nucleoplasm;GO:0005739|mitochondrion;GO:0005829|cytosol;GO:0031965|nuclear membrane;GO:0034399|nuclear periphery	NA	5029	5048	5040	0.652956	7	GAGAUCAUGCUGG-AGACUCA&UGAAGCUGCCAGCAUGAUCUA	13	842.023	2	0.195946	Output/long789/cleaveLand_result/t_plot/osa-miR167a-5p_TRINITY_DN8922_c0_g2_i8_5040_TPlot.pdf	4	152.097	3	0.325545	Output/short456/cleaveLand_result/t_plot/osa-miR167a-5p_TRINITY_DN8922_c0_g2_i8_5040_TPlot.pdf	842.023	152.097	2.46887	up	0	0
osa-miR167a-5p	TRINITY_DN8922_c0_g2_i9	TRINITY_DN8922_c0_g2	NA	NA	GO:0006997|nucleus organization;GO:0097298|regulation of nucleus size;GO:0005634|nucleus;GO:0005635|nuclear envelope;GO:0005652|nuclear lamina;GO:0005654|nucleoplasm;GO:0005739|mitochondrion;GO:0005829|cytosol;GO:0031965|nuclear membrane;GO:0034399|nuclear periphery	NA	3844	3863	3855	0.652956	7	GAGAUCAUGCUGG-AGACUCA&UGAAGCUGCCAGCAUGAUCUA	8	518.168	2	0.1951	Output/long789/cleaveLand_result/t_plot/osa-miR167a-5p_TRINITY_DN8922_c0_g2_i9_3855_TPlot.pdf	2	76.0485	3	0.324262	Output/short456/cleaveLand_result/t_plot/osa-miR167a-5p_TRINITY_DN8922_c0_g2_i9_3855_TPlot.pdf	518.168	76.0485	2.76843	up	1.5465e-73	6.40218e-73
osa-miR167d-5p	TRINITY_DN34956_c1_g1_i1	TRINITY_DN34956_c1_g1	NA	NA	GO:0006986|response to unfolded protein;GO:0009266|response to temperature stimulus;GO:0009408|response to heat;GO:0009615|response to virus;GO:0009617|response to bacterium;GO:0016567|protein ubiquitination;GO:0034620|cellular response to unfolded protein;GO:0042026|protein refolding;GO:0046686|response to cadmium ion;GO:0051085|chaperone cofactor-dependent protein refolding;GO:0005618|cell wall…	ko03040;ko04141;ko04144	1299	1319	1310	0.696517	7	CAGGUGGUGCCGGUGGCUUCC&UGAAGCUGCCAGCAUGAUCUG	28	1813.59	3	0.0911833	Output/long789/cleaveLand_result/t_plot/osa-miR167d-5p_TRINITY_DN34956_c1_g1_i1_1310_TPlot.pdf	0	0	NA	NA	NA	1813.59	0	Inf	up	0	0
osa-miR2098-5p	TRINITY_DN88250_c0_g1_i1	TRINITY_DN88250_c0_g1	NA	NA	GO:0006397|mRNA processing;GO:0006417|regulation of translation;GO:0008380|RNA splicing;GO:0043484|regulation of RNA splicing;GO:0000932|P-body;GO:0005634|nucleus;GO:0005737|cytoplasm;GO:0003729|mRNA binding	NA	158	177	169	0.674157	7	AGGCGGCUUGCCUCC-UGGGA&UCCCGUGGAGGCA-GCCGAUG	0	0	NA	NA	NA	27	1026.66	0	0.0455967	Output/short456/cleaveLand_result/t_plot/osa-miR2098-5p_TRINITY_DN88250_c0_g1_i1_169_TPlot.pdf	0	1026.66	-Inf	down	0	0
osa-miR2098-5p	TRINITY_DN88250_c0_g1_i2	TRINITY_DN88250_c0_g1	NA	NA	GO:0006397|mRNA processing;GO:0006417|regulation of translation;GO:0008380|RNA splicing;GO:0043484|regulation of RNA splicing;GO:0000932|P-body;GO:0005634|nucleus;GO:0005737|cytoplasm;GO:0003729|mRNA binding	NA	588	607	599	0.674157	7	AGGCGGCUUGCCUCC-UGGGA&UCCCGUGGAGGCA-GCCGAUG	0	0	NA	NA	NA	22	836.534	0	0.0452315	Output/short456/cleaveLand_result/t_plot/osa-miR2098-5p_TRINITY_DN88250_c0_g1_i2_599_TPlot.pdf	0	836.534	-Inf	down	0	0
osa-miR2098-5p	TRINITY_DN88250_c0_g1_i6	TRINITY_DN88250_c0_g1	NA	NA	GO:0006397|mRNA processing;GO:0006417|regulation of translation;GO:0008380|RNA splicing;GO:0043484|regulation of RNA splicing;GO:0000932|P-body;GO:0005634|nucleus;GO:0005737|cytoplasm;GO:0003729|mRNA binding	NA	283	302	294	0.674157	7	AGGCGGCUUGCCUCC-UGGGA&UCCCGUGGAGGCA-GCCGAUG	0	0	NA	NA	NA	20	760.485	0	0.0445921	Output/short456/cleaveLand_result/t_plot/osa-miR2098-5p_TRINITY_DN88250_c0_g1_i6_294_TPlot.pdf	0	760.485	-Inf	down	0	0
osa-miR2098-5p	TRINITY_DN88250_c0_g1_i7	TRINITY_DN88250_c0_g1	NA	NA	GO:0006397|mRNA processing;GO:0006417|regulation of translation;GO:0008380|RNA splicing;GO:0043484|regulation of RNA splicing;GO:0000932|P-body;GO:0005634|nucleus;GO:0005737|cytoplasm;GO:0003729|mRNA binding	NA	158	177	169	0.674157	7	AGGCGGCUUGCCUCC-UGGGA&UCCCGUGGAGGCA-GCCGAUG	0	0	NA	NA	NA	13	494.315	2	0.171042	Output/short456/cleaveLand_result/t_plot/osa-miR2098-5p_TRINITY_DN88250_c0_g1_i7_169_TPlot.pdf	0	494.315	-Inf	down	0	0
osa-miR393a	TRINITY_DN112_c0_g1_i15	TRINITY_DN112_c0_g1	NA	NA	GO:0006952|defense response;GO:0007049|cell cycle;GO:0009733|response to auxin;GO:0009734|auxin-activated signaling pathway;GO:0009873|ethylene-activated signaling pathway;GO:0010152|pollen maturation;GO:0010311|lateral root formation;GO:0016036|cellular response to phosphate starvation;GO:0031146|SCF-dependent proteasomal ubiquitin-dependent protein catabolic process;GO:0048443|stamen developmen…	ko04075	1731	1751	1742	0.866667	3.5	AGUCAAUGCGAUCCCUAUGGA&UCCAAAGGGAUCGCAUUGAUC	30	1943.13	2	0.00280107	Output/long789/cleaveLand_result/t_plot/osa-miR393a_TRINITY_DN112_c0_g1_i15_1742_TPlot.pdf	13	494.315	2	0.00310862	Output/short456/cleaveLand_result/t_plot/osa-miR393a_TRINITY_DN112_c0_g1_i15_1742_TPlot.pdf	1943.13	494.315	1.97488	up	0	0
osa-miR393a	TRINITY_DN112_c0_g1_i25	TRINITY_DN112_c0_g1	NA	NA	GO:0006952|defense response;GO:0007049|cell cycle;GO:0009733|response to auxin;GO:0009734|auxin-activated signaling pathway;GO:0009873|ethylene-activated signaling pathway;GO:0010152|pollen maturation;GO:0010311|lateral root formation;GO:0016036|cellular response to phosphate starvation;GO:0031146|SCF-dependent proteasomal ubiquitin-dependent protein catabolic process;GO:0048443|stamen developmen…	ko04075	1826	1846	1837	0.866667	3.5	AGUCAAUGCGAUCCCUAUGGA&UCCAAAGGGAUCGCAUUGAUC	20	1295.42	2	0.00210154	Output/long789/cleaveLand_result/t_plot/osa-miR393a_TRINITY_DN112_c0_g1_i25_1837_TPlot.pdf	12	456.291	2	0.00233238	Output/short456/cleaveLand_result/t_plot/osa-miR393a_TRINITY_DN112_c0_g1_i25_1837_TPlot.pdf	1295.42	456.291	1.50539	up	0	0
osa-miR393a	TRINITY_DN112_c0_g1_i6	TRINITY_DN112_c0_g1	NA	NA	GO:0006952|defense response;GO:0007049|cell cycle;GO:0009733|response to auxin;GO:0009734|auxin-activated signaling pathway;GO:0009873|ethylene-activated signaling pathway;GO:0010152|pollen maturation;GO:0010311|lateral root formation;GO:0016036|cellular response to phosphate starvation;GO:0031146|SCF-dependent proteasomal ubiquitin-dependent protein catabolic process;GO:0048443|stamen developmen…	ko04075	1917	1937	1928	0.866667	3.5	AGUCAAUGCGAUCCCUAUGGA&UCCAAAGGGAUCGCAUUGAUC	32	2072.67	0	0.000667559	Output/long789/cleaveLand_result/t_plot/osa-miR393a_TRINITY_DN112_c0_g1_i6_1928_TPlot.pdf	5	190.121	3	0.00442259	Output/short456/cleaveLand_result/t_plot/osa-miR393a_TRINITY_DN112_c0_g1_i6_1928_TPlot.pdf	2072.67	190.121	3.4465	up	0	0
osa-miR393a	TRINITY_DN2176_c1_g1_i1	TRINITY_DN2176_c1_g1	NA	NA	GO:0006952|defense response;GO:0007049|cell cycle;GO:0009733|response to auxin;GO:0009734|auxin-activated signaling pathway;GO:0009873|ethylene-activated signaling pathway;GO:0010152|pollen maturation;GO:0010311|lateral root formation;GO:0016036|cellular response to phosphate starvation;GO:0031146|SCF-dependent proteasomal ubiquitin-dependent protein catabolic process;GO:0048443|stamen developmen…	ko04075	1774	1793	1784	0.906667	1	GA-CAAUGCGAUCCCUUUGGA&UCCAAAGGGAUCGCAUUGAUC	0	0	NA	NA	NA	6	228.146	3	0.00252959	Output/short456/cleaveLand_result/t_plot/osa-miR393a_TRINITY_DN2176_c1_g1_i1_1784_TPlot.pdf	0	228.146	-Inf	down	1.4931e-51	4.44467e-51
osa-miR393a	TRINITY_DN2176_c1_g1_i2	TRINITY_DN2176_c1_g1	NA	NA	GO:0006952|defense response;GO:0007049|cell cycle;GO:0009733|response to auxin;GO:0009734|auxin-activated signaling pathway;GO:0009873|ethylene-activated signaling pathway;GO:0010152|pollen maturation;GO:0010311|lateral root formation;GO:0016036|cellular response to phosphate starvation;GO:0031146|SCF-dependent proteasomal ubiquitin-dependent protein catabolic process;GO:0048443|stamen developmen…	ko04075	1774	1793	1784	0.906667	1	GA-CAAUGCGAUCCCUUUGGA&UCCAAAGGGAUCGCAUUGAUC	0	0	NA	NA	NA	3	114.073	0	0.000478051	Output/short456/cleaveLand_result/t_plot/osa-miR393a_TRINITY_DN2176_c1_g1_i2_1784_TPlot.pdf	0	114.073	-Inf	down	1.252e-26	2.10489e-26
osa-miR393a	TRINITY_DN2176_c1_g2_i2	TRINITY_DN2176_c1_g2	NA	NA	GO:0006952|defense response;GO:0007049|cell cycle;GO:0009733|response to auxin;GO:0009734|auxin-activated signaling pathway;GO:0009873|ethylene-activated signaling pathway;GO:0010152|pollen maturation;GO:0010311|lateral root formation;GO:0016036|cellular response to phosphate starvation;GO:0031146|SCF-dependent proteasomal ubiquitin-dependent protein catabolic process;GO:0048443|stamen developmen…	ko04075	1797	1816	1807	0.906667	1	GA-CAAUGCGAUCCCUUUGGA&UCCAAAGGGAUCGCAUUGAUC	27	1748.82	3	0.00181377	Output/long789/cleaveLand_result/t_plot/osa-miR393a_TRINITY_DN2176_c1_g2_i2_1807_TPlot.pdf	0	0	NA	NA	NA	1748.82	0	Inf	up	0	0
osa-miR396c-5p	TRINITY_DN14121_c0_g1_i1	TRINITY_DN14121_c0_g1	NA	NA	GO:0051028|mRNA transport;GO:0005634|nucleus;GO:0005737|cytoplasm;GO:0003729|mRNA binding	ko03040	724	744	735	0.694611	5	GGGUGCAAGAAGGCUUUGGAA&UUCCACAGCUUUCUUGAACUU	4	259.084	2	0.21544	Output/long789/cleaveLand_result/t_plot/osa-miR396c-5p_TRINITY_DN14121_c0_g1_i1_735_TPlot.pdf	0	0	NA	NA	NA	259.084	0	Inf	up	2.672e-58	8.29613e-58
osa-miR396c-5p	TRINITY_DN14121_c0_g1_i10	TRINITY_DN14121_c0_g1	NA	NA	GO:0051028|mRNA transport;GO:0005634|nucleus;GO:0005737|cytoplasm;GO:0003729|mRNA binding	ko03040	724	744	735	0.694611	5	GGGUGCAAGAAGGCUUUGGAA&UUCCACAGCUUUCUUGAACUU	4	259.084	2	0.211856	Output/long789/cleaveLand_result/t_plot/osa-miR396c-5p_TRINITY_DN14121_c0_g1_i10_735_TPlot.pdf	0	0	NA	NA	NA	259.084	0	Inf	up	2.672e-58	8.29613e-58
osa-miR396c-5p	TRINITY_DN14121_c0_g1_i11	TRINITY_DN14121_c0_g1	NA	NA	GO:0051028|mRNA transport;GO:0005634|nucleus;GO:0005737|cytoplasm;GO:0003729|mRNA binding	ko03040	687	707	698	0.694611	5	GGGUGCAAGAAGGCUUUGGAA&UUCCACAGCUUUCUUGAACUU	7	453.397	0	0.0634366	Output/long789/cleaveLand_result/t_plot/osa-miR396c-5p_TRINITY_DN14121_c0_g1_i11_698_TPlot.pdf	0	0	NA	NA	NA	453.397	0	Inf	up	0	0
osa-miR396c-5p	TRINITY_DN14121_c0_g1_i13	TRINITY_DN14121_c0_g1	NA	NA	GO:0005886|plasma membrane;GO:0016021|integral component of membrane;GO:0005524|ATP binding;GO:0106310|protein serine kinase activity;GO:0106311|protein threonine kinase activity	ko03040	881	901	892	0.694611	5	GGGUGCAAGAAGGCUUUGGAA&UUCCACAGCUUUCUUGAACUU	3	194.313	2	0.216265	Output/long789/cleaveLand_result/t_plot/osa-miR396c-5p_TRINITY_DN14121_c0_g1_i13_892_TPlot.pdf	0	0	NA	NA	NA	194.313	0	Inf	up	3.6042e-44	8.09893e-44
osa-miR396c-5p	TRINITY_DN14121_c0_g1_i20	TRINITY_DN14121_c0_g1	NA	NA	GO:0051028|mRNA transport;GO:0005634|nucleus;GO:0005737|cytoplasm;GO:0003729|mRNA binding	ko03040	704	724	715	0.694611	5	GGGUGCAAGAAGGCUUUGGAA&UUCCACAGCUUUCUUGAACUU	1	64.771	4	0.208396	Output/long789/cleaveLand_result/t_plot/osa-miR396c-5p_TRINITY_DN14121_c0_g1_i20_715_TPlot.pdf	0	0	NA	NA	NA	64.771	0	Inf	up	8.4037e-16	1.0516e-15
osa-miR396c-5p	TRINITY_DN14121_c0_g1_i29	TRINITY_DN14121_c0_g1	NA	NA	GO:0051028|mRNA transport;GO:0005634|nucleus;GO:0005737|cytoplasm;GO:0003729|mRNA binding	ko03040	724	744	735	0.694611	5	GGGUGCAAGAAGGCUUUGGAA&UUCCACAGCUUUCUUGAACUU	4	259.084	2	0.217089	Output/long789/cleaveLand_result/t_plot/osa-miR396c-5p_TRINITY_DN14121_c0_g1_i29_735_TPlot.pdf	0	0	NA	NA	NA	259.084	0	Inf	up	2.672e-58	8.29613e-58
osa-miR396c-5p	TRINITY_DN14121_c0_g1_i9	TRINITY_DN14121_c0_g1	NA	NA	GO:0051028|mRNA transport;GO:0005634|nucleus;GO:0005737|cytoplasm;GO:0003729|mRNA binding	ko03040	687	707	698	0.694611	5	GGGUGCAAGAAGGCUUUGGAA&UUCCACAGCUUUCUUGAACUU	2	129.542	3	0.352013	Output/long789/cleaveLand_result/t_plot/osa-miR396c-5p_TRINITY_DN14121_c0_g1_i9_698_TPlot.pdf	0	0	NA	NA	NA	129.542	0	Inf	up	5.1393e-30	9.14621e-30
osa-miR396c-5p	TRINITY_DN178_c0_g1_i16	TRINITY_DN178_c0_g1	NA	NA	GO:0009555|pollen development;GO:0009860|pollen tube growth;GO:0052325|cell wall pectin biosynthetic process;GO:0000139|Golgi membrane;GO:0005794|Golgi apparatus;GO:0016021|integral component of membrane;GO:0090406|pollen tube;GO:0047262|polygalacturonate 4-alpha-galacturonosyltransferase activity	NA	2557	2576	2567	0.730539	5	CAGUUCUUG-AAGCUGUGGAA&UUCCACAGCUUUCUUGAACUU	1	64.771	4	0.106366	Output/long789/cleaveLand_result/t_plot/osa-miR396c-5p_TRINITY_DN178_c0_g1_i16_2567_TPlot.pdf	0	0	NA	NA	NA	64.771	0	Inf	up	8.4037e-16	1.0516e-15
osa-miR396c-5p	TRINITY_DN178_c0_g1_i5	TRINITY_DN178_c0_g1	NA	NA	GO:0009555|pollen development;GO:0009860|pollen tube growth;GO:0048358|mucilage pectin biosynthetic process;GO:0052325|cell wall pectin biosynthetic process;GO:0000139|Golgi membrane;GO:0005794|Golgi apparatus;GO:0016021|integral component of membrane;GO:0090406|pollen tube;GO:0047262|polygalacturonate 4-alpha-galacturonosyltransferase activity	NA	1282	1301	1292	0.730539	5	CAGUUCUUG-AAGCUGUGGAA&UUCCACAGCUUUCUUGAACUU	1	64.771	4	0.105785	Output/long789/cleaveLand_result/t_plot/osa-miR396c-5p_TRINITY_DN178_c0_g1_i5_1292_TPlot.pdf	0	0	NA	NA	NA	64.771	0	Inf	up	8.4037e-16	1.0516e-15
osa-miR396c-5p	TRINITY_DN18809_c0_g2_i3	TRINITY_DN18809_c0_g2	NA	NA	GO:0006412|translation;GO:0005773|vacuole;GO:0005829|cytosol;GO:0009506|plasmodesma;GO:0009536|plastid;GO:0022625|cytosolic large ribosomal subunit;GO:0022626|cytosolic ribosome;GO:0003723|RNA binding;GO:0003729|mRNA binding;GO:0003735|structural constituent of ribosome	ko03010	353	374	364	0.661677	6.5	AGGAUUGAGAAGGCUGGUGGAG&UUCCAC-AGCUUUCUUGAACUU	5	323.855	3	0.502585	Output/long789/cleaveLand_result/t_plot/osa-miR396c-5p_TRINITY_DN18809_c0_g2_i3_364_TPlot.pdf	0	0	NA	NA	NA	323.855	0	Inf	up	2.0406e-72	7.88259e-72
osa-miR396c-5p	TRINITY_DN2142_c0_g1_i17	TRINITY_DN2142_c0_g1	NA	NA	GO:0006457|protein folding;GO:0005737|cytoplasm;GO:0005524|ATP binding;GO:0051082|unfolded protein binding	ko04141;ko04626	1505	1525	1516	0.853293	4.5	GAGAGCAAGAAGGCUGUGGAG&UUCCACAGCUUUCUUGAACUU	354	22928.9	2	0.0128893	Output/long789/cleaveLand_result/t_plot/osa-miR396c-5p_TRINITY_DN2142_c0_g1_i17_1516_TPlot.pdf	738	28061.9	2	0.0142966	Output/short456/cleaveLand_result/t_plot/osa-miR396c-5p_TRINITY_DN2142_c0_g1_i17_1516_TPlot.pdf	22928.9	28061.9	-0.291443	down	0	0
osa-miR396c-5p	TRINITY_DN2142_c0_g1_i18	TRINITY_DN2142_c0_g1	NA	NA	GO:0006457|protein folding;GO:0005737|cytoplasm;GO:0005524|ATP binding;GO:0051082|unfolded protein binding	ko04141;ko04626	2016	2036	2027	0.667665	5.5	GAGAGCAAGAAAGCUGUUGAG&UUCCACAGCUUUCUUGAACUU	16	1036.34	2	0.303365	Output/long789/cleaveLand_result/t_plot/osa-miR396c-5p_TRINITY_DN2142_c0_g1_i18_2027_TPlot.pdf	0	0	NA	NA	NA	1036.34	0	Inf	up	0	0
osa-miR396c-5p	TRINITY_DN2142_c0_g1_i2	TRINITY_DN2142_c0_g1	NA	NA	GO:0006457|protein folding;GO:0005737|cytoplasm;GO:0005524|ATP binding;GO:0051082|unfolded protein binding	ko04141;ko04626	1627	1647	1638	0.667665	5.5	GAGAGCAAGAAAGCUGUUGAG&UUCCACAGCUUUCUUGAACUU	19	1230.65	2	0.307748	Output/long789/cleaveLand_result/t_plot/osa-miR396c-5p_TRINITY_DN2142_c0_g1_i2_1638_TPlot.pdf	0	0	NA	NA	NA	1230.65	0	Inf	up	0	0
osa-miR396c-5p	TRINITY_DN2142_c0_g1_i20	TRINITY_DN2142_c0_g1	NA	NA	GO:0006457|protein folding;GO:0034605|cellular response to heat;GO:0050821|protein stabilization;GO:0005737|cytoplasm;GO:0005829|cytosol;GO:0005886|plasma membrane;GO:0009986|cell surface;GO:0032991|protein-containing complex;GO:0048471|perinuclear region of cytoplasm;GO:0005524|ATP binding;GO:0051082|unfolded protein binding	ko04141;ko04626	761	781	772	0.853293	4.5	GAGAGCAAGAAGGCUGUGGAG&UUCCACAGCUUUCUUGAACUU	314	20338.1	2	0.0121969	Output/long789/cleaveLand_result/t_plot/osa-miR396c-5p_TRINITY_DN2142_c0_g1_i20_772_TPlot.pdf	700	26617	2	0.0135291	Output/short456/cleaveLand_result/t_plot/osa-miR396c-5p_TRINITY_DN2142_c0_g1_i20_772_TPlot.pdf	20338.1	26617	-0.388162	down	0	0
osa-miR396c-5p	TRINITY_DN2142_c0_g1_i3	TRINITY_DN2142_c0_g1	NA	NA	GO:0006457|protein folding;GO:0005737|cytoplasm;GO:0005524|ATP binding;GO:0051082|unfolded protein binding	ko04141;ko04626	2028	2048	2039	0.667665	5.5	GAGAGCAAGAAAGCUGUUGAG&UUCCACAGCUUUCUUGAACUU	13	842.023	2	0.310171	Output/long789/cleaveLand_result/t_plot/osa-miR396c-5p_TRINITY_DN2142_c0_g1_i3_2039_TPlot.pdf	0	0	NA	NA	NA	842.023	0	Inf	up	0	0
osa-miR396c-5p	TRINITY_DN2142_c0_g1_i7	TRINITY_DN2142_c0_g1	NA	NA	GO:0006457|protein folding;GO:0005737|cytoplasm;GO:0005524|ATP binding;GO:0051082|unfolded protein binding	ko04141;ko04626	2088	2108	2099	0.853293	4.5	GAGAGCAAGAAGGCUGUGGAG&UUCCACAGCUUUCUUGAACUU	334	21633.5	2	0.0125432	Output/long789/cleaveLand_result/t_plot/osa-miR396c-5p_TRINITY_DN2142_c0_g1_i7_2099_TPlot.pdf	725	27567.6	2	0.0139129	Output/short456/cleaveLand_result/t_plot/osa-miR396c-5p_TRINITY_DN2142_c0_g1_i7_2099_TPlot.pdf	21633.5	27567.6	-0.349704	down	0	0
osa-miR396c-5p	TRINITY_DN716_c0_g1_i2	TRINITY_DN716_c0_g1	NA	NA	NA	NA	1109	1129	1120	0.691617	6	AAGGGCAAGAAAGAAGUGGAA&UUCCACAGCUUUCUUGAACUU	0	0	NA	NA	NA	32	1216.78	2	0.247897	Output/short456/cleaveLand_result/t_plot/osa-miR396c-5p_TRINITY_DN716_c0_g1_i2_1120_TPlot.pdf	0	1216.78	-Inf	down	0	0
osa-miR396c-5p	TRINITY_DN75372_c0_g1_i1	TRINITY_DN75372_c0_g1	NA	NA	GO:0009658|chloroplast organization;GO:0010274|hydrotropism;GO:0005737|cytoplasm;GO:0005783|endoplasmic reticulum;GO:0005789|endoplasmic reticulum membrane;GO:0016020|membrane;GO:0032541|cortical endoplasmic reticulum	NA	699	718	709	0.694611	4.5	GGGUUCUC-AAAGCUGUGGAG&UUCCACAGCUUUCUUGAACUU	3	194.313	3	0.336538	Output/long789/cleaveLand_result/t_plot/osa-miR396c-5p_TRINITY_DN75372_c0_g1_i1_709_TPlot.pdf	5	190.121	3	0.349041	Output/short456/cleaveLand_result/t_plot/osa-miR396c-5p_TRINITY_DN75372_c0_g1_i1_709_TPlot.pdf	194.313	190.121	0.031463	up	0.83069	0.83069
osa-miR396c-5p	TRINITY_DN8340_c0_g2_i1	TRINITY_DN8340_c0_g2	NA	NA	GO:0006457|protein folding;GO:0034605|cellular response to heat;GO:0050821|protein stabilization;GO:0005737|cytoplasm;GO:0005829|cytosol;GO:0005886|plasma membrane;GO:0009986|cell surface;GO:0032991|protein-containing complex;GO:0048471|perinuclear region of cytoplasm;GO:0005524|ATP binding;GO:0051082|unfolded protein binding	ko04141;ko04626	772	792	783	0.652695	6.5	GAGAGCAAGAAGGCUGUUGAG&UUCCACAGCUUUCUUGAACUU	66	4274.89	2	0.369614	Output/long789/cleaveLand_result/t_plot/osa-miR396c-5p_TRINITY_DN8340_c0_g2_i1_783_TPlot.pdf	94	3574.28	2	0.400803	Output/short456/cleaveLand_result/t_plot/osa-miR396c-5p_TRINITY_DN8340_c0_g2_i1_783_TPlot.pdf	4274.89	3574.28	0.258234	up	2.3092e-15	2.8865e-15
osa-miR396c-5p	TRINITY_DN8746_c0_g1_i1	TRINITY_DN8746_c0_g1	NA	NA	GO:0006351|transcription, DNA-templated;GO:0006355|regulation of transcription, DNA-templated;GO:0032502|developmental process;GO:0005634|nucleus;GO:0005524|ATP binding	NA	458	479	469	0.868263	4	UCGUUCAAGAAAGCCUGUGGAA&UUCCACAG-CUUUCUUGAACUU	20	1295.42	0	0.00247726	Output/long789/cleaveLand_result/t_plot/osa-miR396c-5p_TRINITY_DN8746_c0_g1_i1_469_TPlot.pdf	15	570.364	0	0.00248337	Output/short456/cleaveLand_result/t_plot/osa-miR396c-5p_TRINITY_DN8746_c0_g1_i1_469_TPlot.pdf	1295.42	570.364	1.18347	up	2.7182e-63	9.66006e-63
osa-miR396c-5p	TRINITY_DN8746_c0_g1_i13	TRINITY_DN8746_c0_g1	NA	NA	GO:0006351|transcription, DNA-templated;GO:0006355|regulation of transcription, DNA-templated;GO:0032502|developmental process;GO:0005634|nucleus;GO:0005524|ATP binding	NA	458	479	469	0.868263	4	UCGUUCAAGAAAGCCUGUGGAA&UUCCACAG-CUUUCUUGAACUU	26	1684.05	0	0.00238209	Output/long789/cleaveLand_result/t_plot/osa-miR396c-5p_TRINITY_DN8746_c0_g1_i13_469_TPlot.pdf	30	1140.73	3	0.0157054	Output/short456/cleaveLand_result/t_plot/osa-miR396c-5p_TRINITY_DN8746_c0_g1_i13_469_TPlot.pdf	1684.05	1140.73	0.561978	up	1.4572e-24	2.33759e-24
osa-miR396c-5p	TRINITY_DN8746_c0_g1_i14	TRINITY_DN8746_c0_g1	NA	NA	GO:0006351|transcription, DNA-templated;GO:0006355|regulation of transcription, DNA-templated;GO:0032502|developmental process;GO:0005634|nucleus;GO:0005524|ATP binding	NA	458	479	469	0.868263	4	UCGUUCAAGAAAGCCUGUGGAA&UUCCACAG-CUUUCUUGAACUU	12	777.252	0	0.00257242	Output/long789/cleaveLand_result/t_plot/osa-miR396c-5p_TRINITY_DN8746_c0_g1_i14_469_TPlot.pdf	25	950.606	3	0.0169511	Output/short456/cleaveLand_result/t_plot/osa-miR396c-5p_TRINITY_DN8746_c0_g1_i14_469_TPlot.pdf	777.252	950.606	-0.290465	down	3.0164e-05	3.1701e-05
osa-miR396c-5p	TRINITY_DN8746_c0_g1_i16	TRINITY_DN8746_c0_g1	NA	NA	GO:0006351|transcription, DNA-templated;GO:0006355|regulation of transcription, DNA-templated;GO:0032502|developmental process;GO:0005634|nucleus;GO:0005524|ATP binding	NA	531	552	542	0.868263	4	CCGUUCAAGAAAGCCUGUGGAA&UUCCACAG-CUUUCUUGAACUU	9	582.939	3	0.0144184	Output/long789/cleaveLand_result/t_plot/osa-miR396c-5p_TRINITY_DN8746_c0_g1_i16_542_TPlot.pdf	0	0	NA	NA	NA	582.939	0	Inf	up	0	0
osa-miR396c-5p	TRINITY_DN8746_c0_g1_i18	TRINITY_DN8746_c0_g1	NA	NA	GO:0006351|transcription, DNA-templated;GO:0006355|regulation of transcription, DNA-templated;GO:0032502|developmental process;GO:0005634|nucleus;GO:0005524|ATP binding	NA	1629	1650	1640	0.868263	4	CCGUUCAAGAAAGCCUGUGGAA&UUCCACAG-CUUUCUUGAACUU	9	582.939	3	0.0168011	Output/long789/cleaveLand_result/t_plot/osa-miR396c-5p_TRINITY_DN8746_c0_g1_i18_1640_TPlot.pdf	0	0	NA	NA	NA	582.939	0	Inf	up	0	0
osa-miR396c-5p	TRINITY_DN8746_c0_g1_i19	TRINITY_DN8746_c0_g1	NA	NA	GO:0006351|transcription, DNA-templated;GO:0006355|regulation of transcription, DNA-templated;GO:0032502|developmental process;GO:0005634|nucleus;GO:0005524|ATP binding	NA	614	635	625	0.868263	4	CCGUUCAAGAAAGCCUGUGGAA&UUCCACAG-CUUUCUUGAACUU	13	842.023	0	0.00190613	Output/long789/cleaveLand_result/t_plot/osa-miR396c-5p_TRINITY_DN8746_c0_g1_i19_625_TPlot.pdf	0	0	NA	NA	NA	842.023	0	Inf	up	0	0
osa-miR396c-5p	TRINITY_DN8746_c0_g1_i3	TRINITY_DN8746_c0_g1	NA	NA	GO:0006351|transcription, DNA-templated;GO:0006355|regulation of transcription, DNA-templated;GO:0032502|developmental process;GO:0005634|nucleus;GO:0005524|ATP binding	NA	458	479	469	0.868263	4	UCGUUCAAGAAAGCCUGUGGAA&UUCCACAG-CUUUCUUGAACUU	17	1101.11	0	0.00219173	Output/long789/cleaveLand_result/t_plot/osa-miR396c-5p_TRINITY_DN8746_c0_g1_i3_469_TPlot.pdf	21	798.509	3	0.0144581	Output/short456/cleaveLand_result/t_plot/osa-miR396c-5p_TRINITY_DN8746_c0_g1_i3_469_TPlot.pdf	1101.11	798.509	0.463574	up	3.7558e-12	4.5759e-12
osa-miR396c-5p	TRINITY_DN8746_c0_g1_i7	TRINITY_DN8746_c0_g1	NA	NA	GO:0006351|transcription, DNA-templated;GO:0006355|regulation of transcription, DNA-templated;GO:0032502|developmental process;GO:0005634|nucleus;GO:0005524|ATP binding	NA	1712	1733	1723	0.868263	4	CCGUUCAAGAAAGCCUGUGGAA&UUCCACAG-CUUUCUUGAACUU	9	582.939	3	0.0126275	Output/long789/cleaveLand_result/t_plot/osa-miR396c-5p_TRINITY_DN8746_c0_g1_i7_1723_TPlot.pdf	0	0	NA	NA	NA	582.939	0	Inf	up	0	0
osa-miR396c-5p	TRINITY_DN9596_c0_g1_i1	TRINITY_DN9596_c0_g1	NA	NA	NA	NA	90	112	103	0.652695	7	GGGUGAUCAAGAAGGUUGGGGAA&UUCCACAGCUUUCUUGA--ACUU	0	0	NA	NA	NA	27	1026.66	0	0.117665	Output/short456/cleaveLand_result/t_plot/osa-miR396c-5p_TRINITY_DN9596_c0_g1_i1_103_TPlot.pdf	0	1026.66	-Inf	down	0	0
osa-miR396c-5p	TRINITY_DN9596_c0_g1_i3	TRINITY_DN9596_c0_g1	NA	NA	NA	NA	90	112	103	0.652695	7	GGGUGAUCAAGAAGGUUGGGGAA&UUCCACAGCUUUCUUGA--ACUU	0	0	NA	NA	NA	25	950.606	0	0.118424	Output/short456/cleaveLand_result/t_plot/osa-miR396c-5p_TRINITY_DN9596_c0_g1_i3_103_TPlot.pdf	0	950.606	-Inf	down	0	0
osa-miR414	TRINITY_DN14944_c0_g1_i1	TRINITY_DN14944_c0_g1	NA	NA	GO:0006457|protein folding;GO:0034605|cellular response to heat;GO:0050821|protein stabilization;GO:0061077|chaperone-mediated protein folding;GO:0005737|cytoplasm;GO:0005829|cytosol;GO:0005886|plasma membrane;GO:0009986|cell surface;GO:0032991|protein-containing complex;GO:0048471|perinuclear region of cytoplasm;GO:0005524|ATP binding;GO:0016887|ATPase activity;GO:0051082|unfolded protein binding	ko04141;ko04626	765	785	776	0.686684	5.5	CGAUGAUGAGGAUGAGGAGGA&UCAUCCUCAUCAUCAUCGUCC	0	0	NA	NA	NA	2	76.0485	3	0.879887	Output/short456/cleaveLand_result/t_plot/osa-miR414_TRINITY_DN14944_c0_g1_i1_776_TPlot.pdf	0	76.0485	-Inf	down	2.7637e-18	4.06116e-18
osa-miR414	TRINITY_DN14944_c0_g1_i10	TRINITY_DN14944_c0_g1	NA	NA	GO:0006457|protein folding;GO:0034605|cellular response to heat;GO:0050821|protein stabilization;GO:0061077|chaperone-mediated protein folding;GO:0005737|cytoplasm;GO:0005829|cytosol;GO:0005886|plasma membrane;GO:0009986|cell surface;GO:0032991|protein-containing complex;GO:0048471|perinuclear region of cytoplasm;GO:0005524|ATP binding;GO:0016887|ATPase activity;GO:0051082|unfolded protein binding	ko04141;ko04626	441	461	452	0.686684	5.5	CGAUGAUGAGGAUGAGGAGGA&UCAUCCUCAUCAUCAUCGUCC	0	0	NA	NA	NA	2	76.0485	3	0.884949	Output/short456/cleaveLand_result/t_plot/osa-miR414_TRINITY_DN14944_c0_g1_i10_452_TPlot.pdf	0	76.0485	-Inf	down	2.7637e-18	4.06116e-18
osa-miR414	TRINITY_DN14944_c0_g1_i13	TRINITY_DN14944_c0_g1	NA	NA	GO:0006457|protein folding;GO:0034605|cellular response to heat;GO:0050821|protein stabilization;GO:0005737|cytoplasm;GO:0005829|cytosol;GO:0005886|plasma membrane;GO:0009986|cell surface;GO:0032991|protein-containing complex;GO:0048471|perinuclear region of cytoplasm;GO:0005524|ATP binding;GO:0051082|unfolded protein binding	ko04141;ko04626	1893	1913	1904	0.686684	5.5	CGAUGAUGAGGAUGAGGAGGA&UCAUCCUCAUCAUCAUCGUCC	0	0	NA	NA	NA	5	190.121	3	0.884218	Output/short456/cleaveLand_result/t_plot/osa-miR414_TRINITY_DN14944_c0_g1_i13_1904_TPlot.pdf	0	190.121	-Inf	down	2.9642e-43	6.43543e-43
osa-miR414	TRINITY_DN14944_c0_g1_i3	TRINITY_DN14944_c0_g1	NA	NA	GO:0006457|protein folding;GO:0034605|cellular response to heat;GO:0050821|protein stabilization;GO:0061077|chaperone-mediated protein folding;GO:0005737|cytoplasm;GO:0005829|cytosol;GO:0005886|plasma membrane;GO:0009986|cell surface;GO:0032991|protein-containing complex;GO:0048471|perinuclear region of cytoplasm;GO:0005524|ATP binding;GO:0016887|ATPase activity;GO:0051082|unfolded protein binding	ko04141;ko04626	800	820	811	0.686684	5.5	CGAUGAUGAGGAUGAGGAGGA&UCAUCCUCAUCAUCAUCGUCC	0	0	NA	NA	NA	8	304.194	2	0.737224	Output/short456/cleaveLand_result/t_plot/osa-miR414_TRINITY_DN14944_c0_g1_i3_811_TPlot.pdf	0	304.194	-Inf	down	3.9261e-68	1.47708e-67
osa-miR414	TRINITY_DN14944_c0_g1_i6	TRINITY_DN14944_c0_g1	NA	NA	GO:0006457|protein folding;GO:0034605|cellular response to heat;GO:0050821|protein stabilization;GO:0005737|cytoplasm;GO:0005829|cytosol;GO:0005886|plasma membrane;GO:0009986|cell surface;GO:0032991|protein-containing complex;GO:0048471|perinuclear region of cytoplasm;GO:0005524|ATP binding;GO:0051082|unfolded protein binding	ko04141;ko04626	801	821	812	0.686684	5.5	CGAUGAUGAGGAUGAGGAGGA&UCAUCCUCAUCAUCAUCGUCC	0	0	NA	NA	NA	1	38.0243	4	0.741419	Output/short456/cleaveLand_result/t_plot/osa-miR414_TRINITY_DN14944_c0_g1_i6_812_TPlot.pdf	0	38.0243	-Inf	down	6.9845e-10	7.47646e-10
osa-miR414	TRINITY_DN2142_c0_g1_i14	TRINITY_DN2142_c0_g1	NA	NA	GO:0006457|protein folding;GO:0034605|cellular response to heat;GO:0050821|protein stabilization;GO:0005737|cytoplasm;GO:0005829|cytosol;GO:0005886|plasma membrane;GO:0009986|cell surface;GO:0032991|protein-containing complex;GO:0048471|perinuclear region of cytoplasm;GO:0005524|ATP binding;GO:0051082|unfolded protein binding	ko04141;ko04626	16	36	27	0.686684	5.5	CGAUGAUGAGGAUGAGGAGGA&UCAUCCUCAUCAUCAUCGUCC	0	0	NA	NA	NA	3	114.073	3	0.881698	Output/short456/cleaveLand_result/t_plot/osa-miR414_TRINITY_DN2142_c0_g1_i14_27_TPlot.pdf	0	114.073	-Inf	down	1.252e-26	2.10489e-26
osa-miR414	TRINITY_DN2142_c0_g1_i20	TRINITY_DN2142_c0_g1	NA	NA	GO:0006457|protein folding;GO:0034605|cellular response to heat;GO:0050821|protein stabilization;GO:0005737|cytoplasm;GO:0005829|cytosol;GO:0005886|plasma membrane;GO:0009986|cell surface;GO:0032991|protein-containing complex;GO:0048471|perinuclear region of cytoplasm;GO:0005524|ATP binding;GO:0051082|unfolded protein binding	ko04141;ko04626	16	36	27	0.686684	5.5	CGAUGAUGAGGAUGAGGAGGA&UCAUCCUCAUCAUCAUCGUCC	0	0	NA	NA	NA	2	76.0485	3	0.888463	Output/short456/cleaveLand_result/t_plot/osa-miR414_TRINITY_DN2142_c0_g1_i20_27_TPlot.pdf	0	76.0485	-Inf	down	2.7637e-18	4.06116e-18
osa-miR414	TRINITY_DN23184_c0_g1_i3	TRINITY_DN23184_c0_g1	NA	NA	GO:0032259|methylation;GO:0005768|endosome;GO:0005794|Golgi apparatus;GO:0005797|Golgi medial cisterna;GO:0005802|trans-Golgi network;GO:0005886|plasma membrane;GO:0008168|methyltransferase activity	NA	1243	1263	1254	0.671018	6	UGAUGAUGAUGAUGUUGAUGG&UCAUCCUCAUCAUCAUCGUCC	0	0	NA	NA	NA	1	38.0243	4	0.822691	Output/short456/cleaveLand_result/t_plot/osa-miR414_TRINITY_DN23184_c0_g1_i3_1254_TPlot.pdf	0	38.0243	-Inf	down	6.9845e-10	7.47646e-10
osa-miR414	TRINITY_DN23184_c0_g1_i4	TRINITY_DN23184_c0_g1	NA	NA	GO:0032259|methylation;GO:0005768|endosome;GO:0005794|Golgi apparatus;GO:0005797|Golgi medial cisterna;GO:0005802|trans-Golgi network;GO:0005886|plasma membrane;GO:0008168|methyltransferase activity	NA	1243	1263	1254	0.671018	6	UGAUGAUGAUGAUGUUGAUGG&UCAUCCUCAUCAUCAUCGUCC	0	0	NA	NA	NA	1	38.0243	4	0.818851	Output/short456/cleaveLand_result/t_plot/osa-miR414_TRINITY_DN23184_c0_g1_i4_1254_TPlot.pdf	0	38.0243	-Inf	down	6.9845e-10	7.47646e-10
osa-miR414	TRINITY_DN25016_c0_g2_i2	TRINITY_DN25016_c0_g2	NA	NA	GO:0005886|plasma membrane;GO:0016021|integral component of membrane;GO:0005524|ATP binding;GO:0106310|protein serine kinase activity;GO:0106311|protein threonine kinase activity	NA	611	631	622	0.704961	5	GAACGAUGAUGAUGAGAGUGA&UCAUCCUCAUCAUCAUCGUCC	13	842.023	2	0.593167	Output/long789/cleaveLand_result/t_plot/osa-miR414_TRINITY_DN25016_c0_g2_i2_622_TPlot.pdf	7	266.17	2	0.631478	Output/short456/cleaveLand_result/t_plot/osa-miR414_TRINITY_DN25016_c0_g2_i2_622_TPlot.pdf	842.023	266.17	1.66151	up	4.455e-67	1.66522e-66
osa-miR414	TRINITY_DN3297_c0_g1_i5	TRINITY_DN3297_c0_g1	NA	NA	NA	NA	592	615	606	0.665796	6.5	GGAUGAAGAUGAUGAUGGAGAUGA&UCAUCCUCAUCAUCAUC---GUCC	0	0	NA	NA	NA	17	646.412	2	0.837123	Output/short456/cleaveLand_result/t_plot/osa-miR414_TRINITY_DN3297_c0_g1_i5_606_TPlot.pdf	0	646.412	-Inf	down	0	0
osa-miR414	TRINITY_DN3297_c0_g2_i1	TRINITY_DN3297_c0_g2	NA	NA	NA	NA	324	344	335	0.73107	4	UGACGAUGAUGAUGAUGAUGU&UCAUCCUCAUCAUCAUCGUCC	19	1230.65	2	0.451913	Output/long789/cleaveLand_result/t_plot/osa-miR414_TRINITY_DN3297_c0_g2_i1_335_TPlot.pdf	0	0	NA	NA	NA	1230.65	0	Inf	up	0	0
osa-miR414	TRINITY_DN3297_c0_g2_i2	TRINITY_DN3297_c0_g2	NA	NA	NA	NA	324	344	335	0.73107	4	UGACGAUGAUGAUGAUGAUGU&UCAUCCUCAUCAUCAUCGUCC	18	1165.88	2	0.450759	Output/long789/cleaveLand_result/t_plot/osa-miR414_TRINITY_DN3297_c0_g2_i2_335_TPlot.pdf	0	0	NA	NA	NA	1165.88	0	Inf	up	0	0
osa-miR414	TRINITY_DN3357_c0_g1_i1	TRINITY_DN3357_c0_g1	NA	NA	NA	NA	681	701	692	0.684073	6	UGAUGGUGAUGGUGACGGUGA&UCAUCCUCAUCAUCAUCGUCC	1	64.771	4	0.681901	Output/long789/cleaveLand_result/t_plot/osa-miR414_TRINITY_DN3357_c0_g1_i1_692_TPlot.pdf	0	0	NA	NA	NA	64.771	0	Inf	up	8.4037e-16	1.0516e-15
osa-miR414	TRINITY_DN3357_c0_g1_i17	TRINITY_DN3357_c0_g1	NA	NA	NA	NA	101	121	112	0.684073	6	UGAUGGUGAUGGUGACGGUGA&UCAUCCUCAUCAUCAUCGUCC	1	64.771	4	0.678993	Output/long789/cleaveLand_result/t_plot/osa-miR414_TRINITY_DN3357_c0_g1_i17_112_TPlot.pdf	0	0	NA	NA	NA	64.771	0	Inf	up	8.4037e-16	1.0516e-15
osa-miR414	TRINITY_DN3357_c0_g1_i22	TRINITY_DN3357_c0_g1	NA	NA	NA	NA	681	701	692	0.684073	6	UGAUGGUGAUGGUGACGGUGA&UCAUCCUCAUCAUCAUCGUCC	1	64.771	4	0.681487	Output/long789/cleaveLand_result/t_plot/osa-miR414_TRINITY_DN3357_c0_g1_i22_692_TPlot.pdf	0	0	NA	NA	NA	64.771	0	Inf	up	8.4037e-16	1.0516e-15
osa-miR414	TRINITY_DN3357_c0_g1_i5	TRINITY_DN3357_c0_g1	NA	NA	NA	NA	650	670	661	0.684073	6	UGAUGGUGAUGGUGACGGUGA&UCAUCCUCAUCAUCAUCGUCC	2	129.542	3	0.878703	Output/long789/cleaveLand_result/t_plot/osa-miR414_TRINITY_DN3357_c0_g1_i5_661_TPlot.pdf	0	0	NA	NA	NA	129.542	0	Inf	up	5.1393e-30	9.14621e-30
osa-miR414	TRINITY_DN3601_c0_g1_i21	TRINITY_DN3601_c0_g1	NA	NA	NA	NA	4175	4195	4186	0.694517	7	UGAUGGUGAAGGUGAGGGUGU&UCAUCCUCAUCAUCAUCGUCC	0	0	NA	NA	NA	2	76.0485	3	0.852814	Output/short456/cleaveLand_result/t_plot/osa-miR414_TRINITY_DN3601_c0_g1_i21_4186_TPlot.pdf	0	76.0485	-Inf	down	2.7637e-18	4.06116e-18
osa-miR414	TRINITY_DN4464_c0_g1_i2	TRINITY_DN4464_c0_g1	NA	NA	GO:0009873|ethylene-activated signaling pathway;GO:0010087|phloem or xylem histogenesis;GO:0010200|response to chitin;GO:0010928|regulation of auxin mediated signaling pathway;GO:0050832|defense response to fungus;GO:0051301|cell division;GO:0062211|root regeneration;GO:0090357|regulation of tryptophan metabolic process;GO:0005634|nucleus;GO:0003677|DNA binding;GO:0003700|DNA-binding transcriptio…	NA	626	646	637	0.663185	7	GAACGACGGUGGUGGGGGUGG&UCAUCCUCAUCAUCAUCGUCC	5	323.855	3	0.94823	Output/long789/cleaveLand_result/t_plot/osa-miR414_TRINITY_DN4464_c0_g1_i2_637_TPlot.pdf	2	76.0485	3	0.954872	Output/short456/cleaveLand_result/t_plot/osa-miR414_TRINITY_DN4464_c0_g1_i2_637_TPlot.pdf	323.855	76.0485	2.09036	up	2.8495e-35	5.84578e-35
osa-miR414	TRINITY_DN4464_c0_g1_i5	TRINITY_DN4464_c0_g1	NA	NA	GO:0009873|ethylene-activated signaling pathway;GO:0010087|phloem or xylem histogenesis;GO:0010200|response to chitin;GO:0010928|regulation of auxin mediated signaling pathway;GO:0050832|defense response to fungus;GO:0051301|cell division;GO:0062211|root regeneration;GO:0090357|regulation of tryptophan metabolic process;GO:0005634|nucleus;GO:0003677|DNA binding;GO:0003700|DNA-binding transcriptio…	NA	626	646	637	0.663185	7	GAACGACGGUGGUGGGGGUGG&UCAUCCUCAUCAUCAUCGUCC	5	323.855	3	0.947377	Output/long789/cleaveLand_result/t_plot/osa-miR414_TRINITY_DN4464_c0_g1_i5_637_TPlot.pdf	2	76.0485	3	0.954093	Output/short456/cleaveLand_result/t_plot/osa-miR414_TRINITY_DN4464_c0_g1_i5_637_TPlot.pdf	323.855	76.0485	2.09036	up	2.8495e-35	5.84578e-35
osa-miR414	TRINITY_DN4631_c1_g2_i1	TRINITY_DN4631_c1_g2	NA	NA	GO:0005886|plasma membrane;GO:0016021|integral component of membrane;GO:0005524|ATP binding;GO:0106310|protein serine kinase activity;GO:0106311|protein threonine kinase activity	NA	913	933	924	0.822454	2.5	GGAUGAUGAUGAUGAAGAUGA&UCAUCCUCAUCAUCAUCGUCC	0	0	NA	NA	NA	1	38.0243	4	0.0864897	Output/short456/cleaveLand_result/t_plot/osa-miR414_TRINITY_DN4631_c1_g2_i1_924_TPlot.pdf	0	38.0243	-Inf	down	6.9845e-10	7.47646e-10
osa-miR414	TRINITY_DN4785_c0_g1_i38	TRINITY_DN4785_c0_g1	NA	NA	GO:0006355|regulation of transcription, DNA-templated;GO:0006364|rRNA processing;GO:0009631|cold acclimation;GO:0042273|ribosomal large subunit biogenesis;GO:0090070|positive regulation of ribosome biogenesis;GO:0005634|nucleus;GO:0005737|cytoplasm;GO:0005829|cytosol;GO:0030687|preribosome, large subunit precursor;GO:0003676|nucleic acid binding;GO:0003700|DNA-binding transcription factor activit…	NA	823	843	834	0.678851	5.5	UGAUGAUGAUGAAGAGGAAGA&UCAUCCUCAUCAUCAUCGUCC	0	0	NA	NA	NA	9	342.218	3	0.916542	Output/short456/cleaveLand_result/t_plot/osa-miR414_TRINITY_DN4785_c0_g1_i38_834_TPlot.pdf	0	342.218	-Inf	down	2.0371e-76	8.65019e-76
osa-miR414	TRINITY_DN56_c0_g1_i11	TRINITY_DN56_c0_g1	NA	NA	GO:0006814|sodium ion transport;GO:0006874|cellular calcium ion homeostasis;GO:0070588|calcium ion transmembrane transport;GO:0005886|plasma membrane;GO:0016021|integral component of membrane;GO:0005509|calcium ion binding;GO:0015369|calcium:proton antiporter activity	NA	1687	1709	1699	0.707572	6	GGACAGAUGAUGGUGUGGAUAGA&UC-AUCCUCAUCAUCAUC-GUCC	1	64.771	4	0.552225	Output/long789/cleaveLand_result/t_plot/osa-miR414_TRINITY_DN56_c0_g1_i11_1699_TPlot.pdf	0	0	NA	NA	NA	64.771	0	Inf	up	8.4037e-16	1.0516e-15
osa-miR414	TRINITY_DN56_c0_g1_i5	TRINITY_DN56_c0_g1	NA	NA	GO:0006814|sodium ion transport;GO:0006874|cellular calcium ion homeostasis;GO:0070588|calcium ion transmembrane transport;GO:0005886|plasma membrane;GO:0016021|integral component of membrane;GO:0005509|calcium ion binding;GO:0015369|calcium:proton antiporter activity	NA	1983	2005	1995	0.707572	6	GGACAGAUGAUGGUGUGGAUAGA&UC-AUCCUCAUCAUCAUC-GUCC	1	64.771	4	0.551059	Output/long789/cleaveLand_result/t_plot/osa-miR414_TRINITY_DN56_c0_g1_i5_1995_TPlot.pdf	0	0	NA	NA	NA	64.771	0	Inf	up	8.4037e-16	1.0516e-15
osa-miR414	TRINITY_DN59200_c1_g1_i1	TRINITY_DN59200_c1_g1	NA	NA	NA	NA	1409	1429	1420	0.746736	6.5	GGAUGAUGAAGGUGAGGAUCU&UCAUCCUCAUCAUCAUCGUCC	0	0	NA	NA	NA	39	1482.95	3	0.539021	Output/short456/cleaveLand_result/t_plot/osa-miR414_TRINITY_DN59200_c1_g1_i1_1420_TPlot.pdf	0	1482.95	-Inf	down	0	0
osa-miR414	TRINITY_DN7400_c3_g1_i16	TRINITY_DN7400_c3_g1	NA	NA	GO:0002237|response to molecule of bacterial origin;GO:0009611|response to wounding;GO:0009751|response to salicylic acid;GO:0010200|response to chitin;GO:0031347|regulation of defense response;GO:0042742|defense response to bacterium;GO:0045892|negative regulation of transcription, DNA-templated;GO:0050832|defense response to fungus;GO:0005634|nucleus;GO:0003700|DNA-binding transcription factor …	NA	211	231	222	0.75718	4	UUACGAUGAUGAUGAGGAGGA&UCAUCCUCAUCAUCAUCGUCC	3	194.313	3	0.451019	Output/long789/cleaveLand_result/t_plot/osa-miR414_TRINITY_DN7400_c3_g1_i16_222_TPlot.pdf	0	0	NA	NA	NA	194.313	0	Inf	up	3.6042e-44	8.09893e-44
osa-miR414	TRINITY_DN7400_c3_g1_i2	TRINITY_DN7400_c3_g1	NA	NA	GO:0002237|response to molecule of bacterial origin;GO:0009611|response to wounding;GO:0009751|response to salicylic acid;GO:0010200|response to chitin;GO:0031347|regulation of defense response;GO:0042742|defense response to bacterium;GO:0045892|negative regulation of transcription, DNA-templated;GO:0050832|defense response to fungus;GO:0005634|nucleus;GO:0003700|DNA-binding transcription factor …	NA	211	231	222	0.75718	4	UUACGAUGAUGAUGAGGAGGA&UCAUCCUCAUCAUCAUCGUCC	1	64.771	4	0.280304	Output/long789/cleaveLand_result/t_plot/osa-miR414_TRINITY_DN7400_c3_g1_i2_222_TPlot.pdf	0	0	NA	NA	NA	64.771	0	Inf	up	8.4037e-16	1.0516e-15
osa-miR414	TRINITY_DN7400_c3_g1_i5	TRINITY_DN7400_c3_g1	NA	NA	GO:0002237|response to molecule of bacterial origin;GO:0009611|response to wounding;GO:0009751|response to salicylic acid;GO:0010200|response to chitin;GO:0031347|regulation of defense response;GO:0042742|defense response to bacterium;GO:0045892|negative regulation of transcription, DNA-templated;GO:0050832|defense response to fungus;GO:0005634|nucleus;GO:0003700|DNA-binding transcription factor …	NA	211	231	222	0.75718	4	UUACGAUGAUGAUGAGGAGGA&UCAUCCUCAUCAUCAUCGUCC	4	259.084	2	0.289801	Output/long789/cleaveLand_result/t_plot/osa-miR414_TRINITY_DN7400_c3_g1_i5_222_TPlot.pdf	0	0	NA	NA	NA	259.084	0	Inf	up	2.672e-58	8.29613e-58
osa-miR414	TRINITY_DN7616_c0_g2_i1	TRINITY_DN7616_c0_g2	NA	NA	GO:0006334|nucleosome assembly;GO:0005634|nucleus;GO:0005737|cytoplasm	NA	473	496	487	0.755614	5	AGACGAAGAAGAUGAUGAGGAUGA&UCAUCCUCAUCAUC---AUCGUCC	0	0	NA	NA	NA	10	380.243	3	0.480746	Output/short456/cleaveLand_result/t_plot/osa-miR414_TRINITY_DN7616_c0_g2_i1_487_TPlot.pdf	0	380.243	-Inf	down	1.0627e-84	4.7946e-84
osa-miR414	TRINITY_DN79_c0_g2_i1	TRINITY_DN79_c0_g2	NA	NA	GO:0042393|histone binding	NA	872	892	883	0.70235	4.5	GGAUGAAGAUGAUGAGAGUGA&UCAUCCUCAUCAUCAUCGUCC	0	0	NA	NA	NA	6	228.146	3	0.807608	Output/short456/cleaveLand_result/t_plot/osa-miR414_TRINITY_DN79_c0_g2_i1_883_TPlot.pdf	0	228.146	-Inf	down	1.4931e-51	4.44467e-51
osa-miR414	TRINITY_DN79_c0_g2_i1	TRINITY_DN79_c0_g2	NA	NA	GO:0042393|histone binding	NA	989	1009	1000	0.681462	4.5	UGAUGUUGAAGAUGAGGAUGA&UCAUCCUCAUCAUCAUCGUCC	0	0	NA	NA	NA	17	646.412	3	0.907993	Output/short456/cleaveLand_result/t_plot/osa-miR414_TRINITY_DN79_c0_g2_i1_1000_TPlot.pdf	0	646.412	-Inf	down	0	0
osa-miR414	TRINITY_DN922_c0_g1_i12	TRINITY_DN922_c0_g1	NA	NA	NA	NA	971	993	984	0.683551	6.5	GGUUUGGAUGGUGAUGUGGAUGA&UCAUCCUCAUCAUCAUC--GUCC	0	0	NA	NA	NA	1	38.0243	4	0.767041	Output/short456/cleaveLand_result/t_plot/osa-miR414_TRINITY_DN922_c0_g1_i12_984_TPlot.pdf	0	38.0243	-Inf	down	6.9845e-10	7.47646e-10
osa-miR414	TRINITY_DN922_c0_g1_i19	TRINITY_DN922_c0_g1	NA	NA	NA	NA	2116	2138	2129	0.683551	6.5	GGUUUGGAUGGUGAUGUGGAUGA&UCAUCCUCAUCAUCAUC--GUCC	0	0	NA	NA	NA	1	38.0243	4	0.767687	Output/short456/cleaveLand_result/t_plot/osa-miR414_TRINITY_DN922_c0_g1_i19_2129_TPlot.pdf	0	38.0243	-Inf	down	6.9845e-10	7.47646e-10
osa-miR414	TRINITY_DN922_c0_g1_i9	TRINITY_DN922_c0_g1	NA	NA	NA	NA	1059	1081	1072	0.683551	6.5	GGUUUGGAUGGUGAUGUGGAUGA&UCAUCCUCAUCAUCAUC--GUCC	0	0	NA	NA	NA	1	38.0243	4	0.76741	Output/short456/cleaveLand_result/t_plot/osa-miR414_TRINITY_DN922_c0_g1_i9_1072_TPlot.pdf	0	38.0243	-Inf	down	6.9845e-10	7.47646e-10
osa-miR530-5p	TRINITY_DN2485_c0_g1_i2	TRINITY_DN2485_c0_g1	NA	NA	GO:0006270|DNA replication initiation;GO:0007049|cell cycle;GO:0005634|nucleus;GO:0042555|MCM complex;GO:0003677|DNA binding;GO:0003678|DNA helicase activity;GO:0005524|ATP binding;GO:0046872|metal ion binding	ko03030	829	848	839	0.827493	6	AUGGUGCAGGUGCAGACGCU&UGCAUUUGCACCUGCACCUA	2	129.542	3	0.0649641	Output/long789/cleaveLand_result/t_plot/osa-miR530-5p_TRINITY_DN2485_c0_g1_i2_839_TPlot.pdf	1	38.0243	4	0.0430844	Output/short456/cleaveLand_result/t_plot/osa-miR530-5p_TRINITY_DN2485_c0_g1_i2_839_TPlot.pdf	129.542	38.0243	1.76843	up	1.5473e-12	1.90526e-12
osa-miR530-5p	TRINITY_DN2485_c0_g1_i28	TRINITY_DN2485_c0_g1	NA	NA	GO:0006270|DNA replication initiation;GO:0007049|cell cycle;GO:0005634|nucleus;GO:0042555|MCM complex;GO:0003677|DNA binding;GO:0003678|DNA helicase activity;GO:0005524|ATP binding;GO:0046872|metal ion binding	ko03030	829	848	839	0.827493	6	AUGGUGCAGGUGCAGACGCU&UGCAUUUGCACCUGCACCUA	6	388.626	2	0.037497	Output/long789/cleaveLand_result/t_plot/osa-miR530-5p_TRINITY_DN2485_c0_g1_i28_839_TPlot.pdf	1	38.0243	4	0.0423247	Output/short456/cleaveLand_result/t_plot/osa-miR530-5p_TRINITY_DN2485_c0_g1_i28_839_TPlot.pdf	388.626	38.0243	3.35339	up	1.2452e-64	4.56573e-64
osa-miR530-5p	TRINITY_DN2485_c0_g1_i34	TRINITY_DN2485_c0_g1	NA	NA	GO:0006270|DNA replication initiation;GO:0007049|cell cycle;GO:0005634|nucleus;GO:0042555|MCM complex;GO:0003677|DNA binding;GO:0003678|DNA helicase activity;GO:0005524|ATP binding;GO:0046872|metal ion binding	ko03030	805	824	815	0.827493	6	AUGGUGCAGGUGCAGACGCU&UGCAUUUGCACCUGCACCUA	6	388.626	2	0.0395197	Output/long789/cleaveLand_result/t_plot/osa-miR530-5p_TRINITY_DN2485_c0_g1_i34_815_TPlot.pdf	0	0	NA	NA	NA	388.626	0	Inf	up	1.5868e-86	7.5422e-86
osa-miR530-5p	TRINITY_DN2485_c0_g1_i35	TRINITY_DN2485_c0_g1	NA	NA	GO:0000727|double-strand break repair via break-induced replication;GO:0006267|pre-replicative complex assembly involved in nuclear cell cycle DNA replication;GO:0006268|DNA unwinding involved in DNA replication;GO:0006270|DNA replication initiation;GO:1902969|mitotic DNA replication;GO:0000347|THO complex;GO:0005634|nucleus;GO:0042555|MCM complex;GO:0003678|DNA helicase activity;GO:0003688|DNA r…	ko03030	2311	2330	2321	0.827493	6	AUGGUGCAGGUGCAGACGCU&UGCAUUUGCACCUGCACCUA	4	259.084	3	0.06666	Output/long789/cleaveLand_result/t_plot/osa-miR530-5p_TRINITY_DN2485_c0_g1_i35_2321_TPlot.pdf	0	0	NA	NA	NA	259.084	0	Inf	up	2.672e-58	8.29613e-58
osa-miR530-5p	TRINITY_DN2485_c0_g1_i4	TRINITY_DN2485_c0_g1	NA	NA	GO:0006270|DNA replication initiation;GO:0007049|cell cycle;GO:0005634|nucleus;GO:0042555|MCM complex;GO:0003677|DNA binding;GO:0003678|DNA helicase activity;GO:0005524|ATP binding;GO:0046872|metal ion binding	ko03030	805	824	815	0.827493	6	AUGGUGCAGGUGCAGACGCU&UGCAUUUGCACCUGCACCUA	3	194.313	3	0.0660951	Output/long789/cleaveLand_result/t_plot/osa-miR530-5p_TRINITY_DN2485_c0_g1_i4_815_TPlot.pdf	3	114.073	3	0.0690517	Output/short456/cleaveLand_result/t_plot/osa-miR530-5p_TRINITY_DN2485_c0_g1_i4_815_TPlot.pdf	194.313	114.073	0.768429	up	4.8864e-06	5.18255e-06
osa-miR530-5p	TRINITY_DN2485_c0_g1_i7	TRINITY_DN2485_c0_g1	NA	NA	GO:0006270|DNA replication initiation;GO:0007049|cell cycle;GO:0005634|nucleus;GO:0042555|MCM complex;GO:0003677|DNA binding;GO:0003678|DNA helicase activity;GO:0005524|ATP binding;GO:0046872|metal ion binding	ko03030	632	651	642	0.827493	6	AUGGUGCAGGUGCAGACGCU&UGCAUUUGCACCUGCACCUA	3	194.313	3	0.0632651	Output/long789/cleaveLand_result/t_plot/osa-miR530-5p_TRINITY_DN2485_c0_g1_i7_642_TPlot.pdf	0	0	NA	NA	NA	194.313	0	Inf	up	3.6042e-44	8.09893e-44
osa-miR530-5p	TRINITY_DN31731_c3_g1_i1	TRINITY_DN31731_c3_g1	NA	NA	NA	NA	86	106	97	0.679245	6.5	CAGGUGUUGAGUGUAAGUGCA&UGCAUUUGCAC-CUGCACCUA	0	0	NA	NA	NA	1	38.0243	4	0.323488	Output/short456/cleaveLand_result/t_plot/osa-miR530-5p_TRINITY_DN31731_c3_g1_i1_97_TPlot.pdf	0	38.0243	-Inf	down	6.9845e-10	7.47646e-10
pab-miR156e	TRINITY_DN174703_c0_g1_i2	TRINITY_DN174703_c0_g1	NA	NA	NA	NA	465	485	476	0.722646	4	UUGCCAAACUCUCUUCUGUUA&UGACAGAAGAGAGU-GGGCAC	3	194.313	3	0.0939289	Output/long789/cleaveLand_result/t_plot/pab-miR156e_TRINITY_DN174703_c0_g1_i2_476_TPlot.pdf	0	0	NA	NA	NA	194.313	0	Inf	up	3.6042e-44	8.09893e-44
pab-miR156e	TRINITY_DN17771_c0_g1_i1	TRINITY_DN17771_c0_g1	NA	NA	NA	NA	13	32	23	0.86514	1.5	GUGCUCUCUCUCUUCUGUCA&UGACAGAAGAGAGUGGGCAC	3	194.313	3	0.0150146	Output/long789/cleaveLand_result/t_plot/pab-miR156e_TRINITY_DN17771_c0_g1_i1_23_TPlot.pdf	0	0	NA	NA	NA	194.313	0	Inf	up	3.6042e-44	8.09893e-44
pab-miR156e	TRINITY_DN6217_c0_g1_i3	TRINITY_DN6217_c0_g1	NA	NA	NA	NA	274	293	284	0.735369	4.5	GUGCUCUCUCUCCUCUGUCG&UGACAGAAGAGAGUGGGCAC	4	259.084	3	0.0734131	Output/long789/cleaveLand_result/t_plot/pab-miR156e_TRINITY_DN6217_c0_g1_i3_284_TPlot.pdf	1	38.0243	4	0.0487624	Output/short456/cleaveLand_result/t_plot/pab-miR156e_TRINITY_DN6217_c0_g1_i3_284_TPlot.pdf	259.084	38.0243	2.76843	up	1.1756e-37	2.42901e-37
pab-miR156e	TRINITY_DN6217_c0_g1_i7	TRINITY_DN6217_c0_g1	NA	NA	NA	NA	274	293	284	0.735369	4.5	GUGCUCUCUCUCCUCUGUCG&UGACAGAAGAGAGUGGGCAC	1	64.771	4	0.039814	Output/long789/cleaveLand_result/t_plot/pab-miR156e_TRINITY_DN6217_c0_g1_i7_284_TPlot.pdf	1	38.0243	4	0.0483849	Output/short456/cleaveLand_result/t_plot/pab-miR156e_TRINITY_DN6217_c0_g1_i7_284_TPlot.pdf	64.771	38.0243	0.768429	up	0.0083365	0.00847593
pab-miR156e	TRINITY_DN6217_c0_g1_i8	TRINITY_DN6217_c0_g1	NA	NA	NA	NA	274	293	284	0.735369	4.5	GUGCUCUCUCUCCUCUGUCG&UGACAGAAGAGAGUGGGCAC	3	194.313	3	0.0762124	Output/long789/cleaveLand_result/t_plot/pab-miR156e_TRINITY_DN6217_c0_g1_i8_284_TPlot.pdf	1	38.0243	4	0.0506476	Output/short456/cleaveLand_result/t_plot/pab-miR156e_TRINITY_DN6217_c0_g1_i8_284_TPlot.pdf	194.313	38.0243	2.35339	up	1.1354e-24	1.84702e-24
pab-miR156e	TRINITY_DN9504_c0_g1_i1	TRINITY_DN9504_c0_g1	NA	NA	GO:0005886|plasma membrane;GO:0016021|integral component of membrane;GO:0005524|ATP binding;GO:0106310|protein serine kinase activity;GO:0106311|protein threonine kinase activity	NA	1947	1966	1957	0.86514	1.5	GUGCUCUCUCUCUUCUGUCA&UGACAGAAGAGAGUGGGCAC	1	64.771	4	0.00680231	Output/long789/cleaveLand_result/t_plot/pab-miR156e_TRINITY_DN9504_c0_g1_i1_1957_TPlot.pdf	0	0	NA	NA	NA	64.771	0	Inf	up	8.4037e-16	1.0516e-15
pab-miR156e	TRINITY_DN9504_c0_g1_i11	TRINITY_DN9504_c0_g1	NA	NA	GO:0005886|plasma membrane;GO:0016021|integral component of membrane;GO:0005524|ATP binding;GO:0106310|protein serine kinase activity;GO:0106311|protein threonine kinase activity	NA	1730	1749	1740	0.86514	1.5	GUGCUCUCUCUCUUCUGUCA&UGACAGAAGAGAGUGGGCAC	3	194.313	3	0.0132248	Output/long789/cleaveLand_result/t_plot/pab-miR156e_TRINITY_DN9504_c0_g1_i11_1740_TPlot.pdf	0	0	NA	NA	NA	194.313	0	Inf	up	3.6042e-44	8.09893e-44
pab-miR156e	TRINITY_DN9504_c0_g1_i6	TRINITY_DN9504_c0_g1	NA	NA	GO:0005886|plasma membrane;GO:0016021|integral component of membrane;GO:0005524|ATP binding;GO:0106310|protein serine kinase activity;GO:0106311|protein threonine kinase activity	NA	814	833	824	0.86514	1.5	GUGCUCUCUCUCUUCUGUCA&UGACAGAAGAGAGUGGGCAC	3	194.313	3	0.0138218	Output/long789/cleaveLand_result/t_plot/pab-miR156e_TRINITY_DN9504_c0_g1_i6_824_TPlot.pdf	0	0	NA	NA	NA	194.313	0	Inf	up	3.6042e-44	8.09893e-44
pab-miR156x	TRINITY_DN17771_c0_g1_i1	TRINITY_DN17771_c0_g1	NA	NA	NA	NA	13	32	23	0.859416	3	GUGCUCUCUCUCUUCUGUCA&UGACAGGAGAUAGAGAGCAC	3	194.313	3	0.00603311	Output/long789/cleaveLand_result/t_plot/pab-miR156x_TRINITY_DN17771_c0_g1_i1_23_TPlot.pdf	0	0	NA	NA	NA	194.313	0	Inf	up	3.6042e-44	8.09893e-44
pab-miR156x	TRINITY_DN6217_c0_g1_i3	TRINITY_DN6217_c0_g1	NA	NA	NA	NA	274	293	284	0.713528	6	GUGCUCUCUCUCCUCUGUCG&UGACAGGAGAUAGAGAGCAC	4	259.084	3	0.132034	Output/long789/cleaveLand_result/t_plot/pab-miR156x_TRINITY_DN6217_c0_g1_i3_284_TPlot.pdf	1	38.0243	4	0.0886618	Output/short456/cleaveLand_result/t_plot/pab-miR156x_TRINITY_DN6217_c0_g1_i3_284_TPlot.pdf	259.084	38.0243	2.76843	up	1.1756e-37	2.42901e-37
pab-miR156x	TRINITY_DN6217_c0_g1_i7	TRINITY_DN6217_c0_g1	NA	NA	NA	NA	274	293	284	0.713528	6	GUGCUCUCUCUCCUCUGUCG&UGACAGGAGAUAGAGAGCAC	1	64.771	4	0.0723317	Output/long789/cleaveLand_result/t_plot/pab-miR156x_TRINITY_DN6217_c0_g1_i7_284_TPlot.pdf	1	38.0243	4	0.0875764	Output/short456/cleaveLand_result/t_plot/pab-miR156x_TRINITY_DN6217_c0_g1_i7_284_TPlot.pdf	64.771	38.0243	0.768429	up	0.0083365	0.00847593
pab-miR156x	TRINITY_DN6217_c0_g1_i8	TRINITY_DN6217_c0_g1	NA	NA	NA	NA	274	293	284	0.713528	6	GUGCUCUCUCUCCUCUGUCG&UGACAGGAGAUAGAGAGCAC	3	194.313	3	0.144548	Output/long789/cleaveLand_result/t_plot/pab-miR156x_TRINITY_DN6217_c0_g1_i8_284_TPlot.pdf	1	38.0243	4	0.0972985	Output/short456/cleaveLand_result/t_plot/pab-miR156x_TRINITY_DN6217_c0_g1_i8_284_TPlot.pdf	194.313	38.0243	2.35339	up	1.1354e-24	1.84702e-24
pab-miR156x	TRINITY_DN9504_c0_g1_i1	TRINITY_DN9504_c0_g1	NA	NA	GO:0005886|plasma membrane;GO:0016021|integral component of membrane;GO:0005524|ATP binding;GO:0106310|protein serine kinase activity;GO:0106311|protein threonine kinase activity	NA	1947	1966	1957	0.859416	3	GUGCUCUCUCUCUUCUGUCA&UGACAGGAGAUAGAGAGCAC	1	64.771	4	0.00194826	Output/long789/cleaveLand_result/t_plot/pab-miR156x_TRINITY_DN9504_c0_g1_i1_1957_TPlot.pdf	0	0	NA	NA	NA	64.771	0	Inf	up	8.4037e-16	1.0516e-15
[truncated: 379 more rows]
