# Supplementary material for: Analyzing the defense response mechanism of Atractylodes macrocephala to Fusarium oxysporum through small RNA and degradome sequencing
Source: Front Plant Sci. 2024 Jul 22;15:1415209. doi: 10.3389/fpls.2024.1415209 (PMC11298489; doi:10.3389/fpls.2024.1415209)
Supplement: Supplementary file 11 [file Table_8.xlsx]

## Sheet: Group.Fo-6d_vs_ca.demiRNA_targe
Table S8 Detailed information on GO enrichment analysis
Term ID	Category	Description	GeneRatio	BgRatio	Enrich_factor	P_value	P_adjust	GeneCount
GO:0003700	molecular_function	DNA-binding transcription factor activity	1022/30771	1208/40888	1.12419	6.79815e-16	6.3454e-12	1022
GO:0140110	molecular_function	transcription regulator activity	1192/30771	1431/40888	1.10686	5.01499e-14	2.34049e-10	1192
GO:0010556	biological_process	regulation of macromolecule biosynthetic process	2052/30771	2579/40888	1.05726	5.31687e-08	0.000165425	2052
GO:2000112	biological_process	regulation of cellular macromolecule biosynthetic process	2046/30771	2573/40888	1.05662	7.66185e-08	0.000169861	2046
GO:0009889	biological_process	regulation of biosynthetic process	2260/30771	2851/40888	1.05333	9.09907e-08	0.000169861	2260
GO:0000976	molecular_function	transcription regulatory region sequence-specific DNA binding	450/30771	533/40888	1.12186	1.49099e-07	0.000173962	450
GO:0001067	molecular_function	regulatory region nucleic acid binding	450/30771	533/40888	1.12186	1.49099e-07	0.000173962	450
GO:0044212	molecular_function	transcription regulatory region DNA binding	450/30771	533/40888	1.12186	1.49099e-07	0.000173962	450
GO:0043565	molecular_function	sequence-specific DNA binding	809/30771	987/40888	1.08914	2.007e-07	0.000194156	809
GO:0031326	biological_process	regulation of cellular biosynthetic process	2232/30771	2819/40888	1.05209	2.08009e-07	0.000194156	2232
GO:0051171	biological_process	regulation of nitrogen compound metabolic process	2558/30771	3249/40888	1.04618	6.70568e-07	0.000556057	2558
GO:2001141	biological_process	regulation of RNA biosynthetic process	1523/30771	1908/40888	1.06066	7.82423e-07	0.000556057	1523
GO:0006355	biological_process	regulation of transcription, DNA-templated	1522/30771	1907/40888	1.06052	8.34027e-07	0.000556057	1522
GO:1903506	biological_process	regulation of nucleic acid-templated transcription	1522/30771	1907/40888	1.06052	8.34027e-07	0.000556057	1522
GO:1990837	molecular_function	sequence-specific double-stranded DNA binding	507/30771	610/40888	1.10442	1.56811e-06	0.000975785	507
GO:0031323	biological_process	regulation of cellular metabolic process	2873/30771	3667/40888	1.04107	2.28532e-06	0.0013332	2873
GO:0019219	biological_process	regulation of nucleobase-containing compound metabolic process	1798/30771	2270/40888	1.05249	2.80843e-06	0.00151231	1798
GO:0080090	biological_process	regulation of primary metabolic process	2601/30771	3314/40888	1.0429	2.91639e-06	0.00151231	2601
GO:0003690	molecular_function	double-stranded DNA binding	635/30771	774/40888	1.09015	3.11148e-06	0.00152856	635
GO:0051252	biological_process	regulation of RNA metabolic process	1697/30771	2141/40888	1.05322	4.03187e-06	0.00188168	1697
GO:0031224	cellular_component	intrinsic component of membrane	5951/30771	7722/40888	1.02403	2.06541e-05	0.00918025	5951
GO:0016021	cellular_component	integral component of membrane	5807/30771	7537/40888	1.02378	3.21576e-05	0.0136436	5807
GO:0003677	molecular_function	DNA binding	2389/30771	3056/40888	1.03876	4.61644e-05	0.0187347	2389
GO:0060255	biological_process	regulation of macromolecule metabolic process	3041/30771	3909/40888	1.03372	5.09353e-05	0.0198096	3041
GO:0051651	biological_process	maintenance of location in cell	73/30771	79/40888	1.22786	8.00073e-05	0.0298715	73
GO:0010468	biological_process	regulation of gene expression	2616/30771	3358/40888	1.03517	9.63932e-05	0.0346051	2616
GO:0044425	cellular_component	membrane part	7145/30771	9314/40888	1.01934	0.000104638	0.0361736	7145
GO:0019222	biological_process	regulation of metabolic process	3482/30771	4495/40888	1.02933	0.000132703	0.0442376	3482
GO:2000242	biological_process	negative regulation of reproductive process	103/30771	116/40888	1.17987	0.000212984	0.0685516	103
GO:0000981	molecular_function	DNA-binding transcription factor activity, RNA polymerase II-specific	154/30771	179/40888	1.1432	0.00028695	0.0892797	154
GO:0050794	biological_process	regulation of cellular process	6054/30771	7896/40888	1.0188	0.000589818	0.177592	6054
GO:0055083	biological_process	monovalent inorganic anion homeostasis	26/30771	26/40888	1.32878	0.000615253	0.179462	26
GO:0031327	biological_process	negative regulation of cellular biosynthetic process	448/30771	553/40888	1.07648	0.000713946	0.201938	448
GO:0000987	molecular_function	proximal promoter sequence-specific DNA binding	130/30771	151/40888	1.14399	0.000785236	0.21557	130
GO:0032507	biological_process	maintenance of protein location in cell	32/30771	33/40888	1.28852	0.000996074	0.25826	32
GO:0045185	biological_process	maintenance of protein location	32/30771	33/40888	1.28852	0.000996074	0.25826	32
GO:0000776	cellular_component	kinetochore	38/30771	40/40888	1.26234	0.00113075	0.279625	38
GO:0009890	biological_process	negative regulation of biosynthetic process	449/30771	556/40888	1.07306	0.00115157	0.279625	449
GO:0045824	biological_process	negative regulation of innate immune response	49/30771	53/40888	1.2285	0.00125933	0.279625	49
GO:0050777	biological_process	negative regulation of immune response	49/30771	53/40888	1.2285	0.00125933	0.279625	49
GO:0006906	biological_process	vesicle fusion	74/30771	83/40888	1.1847	0.00126246	0.279625	74
GO:0009579	cellular_component	thylakoid	518/30771	645/40888	1.06715	0.00127721	0.279625	518
GO:0009909	biological_process	regulation of flower development	229/30771	276/40888	1.10251	0.00128818	0.279625	229
GO:0051172	biological_process	negative regulation of nitrogen compound metabolic process	507/30771	631/40888	1.06766	0.00132364	0.280792	507
GO:0065007	biological_process	biological regulation	8243/30771	10800/40888	1.01418	0.00138704	0.287702	8243
GO:0048284	biological_process	organelle fusion	150/30771	177/40888	1.12609	0.00146717	0.297707	150
GO:0031324	biological_process	negative regulation of cellular metabolic process	574/30771	718/40888	1.06229	0.0015828	0.314338	574
GO:0035437	biological_process	maintenance of protein localization in endoplasmic reticulum	30/30771	31/40888	1.28592	0.00166187	0.31657	30
GO:0072595	biological_process	maintenance of protein localization in organelle	30/30771	31/40888	1.28592	0.00166187	0.31657	30
GO:0031625	molecular_function	ubiquitin protein ligase binding	184/30771	220/40888	1.11135	0.00175251	0.322834	184
GO:0000977	molecular_function	RNA polymerase II regulatory region sequence-specific DNA binding	176/30771	210/40888	1.11365	0.00179852	0.322834	176
GO:0001012	molecular_function	RNA polymerase II regulatory region DNA binding	176/30771	210/40888	1.11365	0.00179852	0.322834	176
GO:0055062	biological_process	phosphate ion homeostasis	22/30771	22/40888	1.32878	0.00191955	0.331798	22
GO:0072506	biological_process	trivalent inorganic anion homeostasis	22/30771	22/40888	1.32878	0.00191955	0.331798	22
GO:0008187	molecular_function	poly-pyrimidine tract binding	98/30771	113/40888	1.1524	0.00201801	0.342475	98
GO:0050789	biological_process	regulation of biological process	7039/30771	9217/40888	1.01479	0.0024875	0.405533	7039
GO:0045893	biological_process	positive regulation of transcription, DNA-templated	466/30771	581/40888	1.06577	0.00260388	0.405533	466
GO:1902680	biological_process	positive regulation of RNA biosynthetic process	466/30771	581/40888	1.06577	0.00260388	0.405533	466
GO:1903508	biological_process	positive regulation of nucleic acid-templated transcription	466/30771	581/40888	1.06577	0.00260388	0.405533	466
GO:0051235	biological_process	maintenance of location	92/30771	106/40888	1.15328	0.00260681	0.405533	92
GO:0006621	biological_process	protein retention in ER lumen	28/30771	29/40888	1.28296	0.00276305	0.415973	28
GO:0031425	biological_process	chloroplast RNA processing	28/30771	29/40888	1.28296	0.00276305	0.415973	28
GO:0009910	biological_process	negative regulation of flower development	64/30771	72/40888	1.18114	0.00322434	0.47025	64
GO:0051117	molecular_function	ATPase binding	64/30771	72/40888	1.18114	0.00322434	0.47025	64
GO:0006549	biological_process	isoleucine metabolic process	59/30771	66/40888	1.18785	0.00341421	0.482853	59
GO:0009097	biological_process	isoleucine biosynthetic process	59/30771	66/40888	1.18785	0.00341421	0.482853	59
GO:0051784	biological_process	negative regulation of nuclear division	27/30771	28/40888	1.28133	0.0035576	0.495621	27
GO:0010948	biological_process	negative regulation of cell cycle process	49/30771	54/40888	1.20575	0.00362539	0.497638	49
GO:0010558	biological_process	negative regulation of macromolecule biosynthetic process	412/30771	513/40888	1.06717	0.0037444	0.506525	412
GO:0090406	cellular_component	pollen tube	126/30771	149/40888	1.12367	0.00401065	0.534792	126
GO:0010449	biological_process	root meristem growth	38/30771	41/40888	1.23156	0.00416828	0.541428	38
GO:0005515	molecular_function	protein binding	4622/30771	6033/40888	1.01801	0.00417643	0.541428	4622
GO:0019899	molecular_function	enzyme binding	941/30771	1199/40888	1.04286	0.00431878	0.552212	941
GO:2000113	biological_process	negative regulation of cellular macromolecule biosynthetic process	402/30771	501/40888	1.06621	0.00464456	0.572202	402
GO:0009534	cellular_component	chloroplast thylakoid	447/30771	559/40888	1.06255	0.00469959	0.572202	447
GO:0031976	cellular_component	plastid thylakoid	447/30771	559/40888	1.06255	0.00469959	0.572202	447
GO:0045935	biological_process	positive regulation of nucleobase-containing compound metabolic process	536/30771	674/40888	1.05672	0.00481676	0.572202	536
GO:0045786	biological_process	negative regulation of cell cycle	75/30771	86/40888	1.15882	0.00484035	0.572202	75
GO:0008266	molecular_function	poly(U) RNA binding	92/30771	107/40888	1.14251	0.00485846	0.572202	92
GO:0051093	biological_process	negative regulation of developmental process	197/30771	239/40888	1.09527	0.0049542	0.572202	197
GO:0006573	biological_process	valine metabolic process	96/30771	112/40888	1.13896	0.00496554	0.572202	96
GO:0046961	molecular_function	proton-transporting ATPase activity, rotational mechanism	178/30771	215/40888	1.10011	0.00509311	0.579745	178
GO:0009451	biological_process	RNA modification	379/30771	472/40888	1.06697	0.005378	0.604799	379
GO:0000978	molecular_function	RNA polymerase II proximal promoter sequence-specific DNA binding	115/30771	136/40888	1.1236	0.00587311	0.621032	115
GO:0000777	cellular_component	condensed chromosome kinetochore	25/30771	26/40888	1.27768	0.00587894	0.621032	25
GO:0002832	biological_process	negative regulation of response to biotic stimulus	111/30771	131/40888	1.12592	0.0058794	0.621032	111
GO:0032102	biological_process	negative regulation of response to external stimulus	111/30771	131/40888	1.12592	0.0058794	0.621032	111
GO:0043901	biological_process	negative regulation of multi-organism process	111/30771	131/40888	1.12592	0.0058794	0.621032	111
GO:0034271	cellular_component	phosphatidylinositol 3-kinase complex, class III, type I	18/30771	18/40888	1.32878	0.0059881	0.621032	18
GO:0034272	cellular_component	phosphatidylinositol 3-kinase complex, class III, type II	18/30771	18/40888	1.32878	0.0059881	0.621032	18
GO:0035266	biological_process	meristem growth	51/30771	57/40888	1.18891	0.00619795	0.627462	51
GO:0051254	biological_process	positive regulation of RNA metabolic process	508/30771	639/40888	1.05637	0.00619896	0.627462	508
GO:0010557	biological_process	positive regulation of macromolecule biosynthetic process	650/30771	823/40888	1.04946	0.00628798	0.627462	650
GO:0044769	molecular_function	ATPase activity, coupled to transmembrane movement of ions, rotational mechanism	231/30771	283/40888	1.08463	0.00643709	0.627462	231
GO:0043878	molecular_function	glyceraldehyde-3-phosphate dehydrogenase (NAD+) (non-phosphorylating) activity	90/30771	105/40888	1.13896	0.00644589	0.627462	90
GO:0048831	biological_process	regulation of shoot system development	359/30771	447/40888	1.06719	0.00645344	0.627462	359
GO:0009507	cellular_component	chloroplast	3534/30771	4605/40888	1.01974	0.00666587	0.641436	3534
GO:0003730	molecular_function	mRNA 3'-UTR binding	77/30771	89/40888	1.14962	0.00688019	0.655136	77
GO:0055069	biological_process	zinc ion homeostasis	55/30771	62/40888	1.17876	0.00694862	0.655136	55
GO:0016814	molecular_function	hydrolase activity, acting on carbon-nitrogen (but not peptide) bonds, in cyclic amidines	59/30771	67/40888	1.17012	0.00759404	0.701847	59
GO:0090174	biological_process	organelle membrane fusion	101/30771	119/40888	1.12779	0.00759444	0.701847	101
GO:0008356	biological_process	asymmetric cell division	17/30771	17/40888	1.32878	0.00795797	0.721162	17
GO:0030242	biological_process	autophagy of peroxisome	17/30771	17/40888	1.32878	0.00795797	0.721162	17
GO:0044389	molecular_function	ubiquitin-like protein ligase binding	192/30771	234/40888	1.09028	0.0080637	0.721687	192
GO:0005484	molecular_function	SNAP receptor activity	54/30771	61/40888	1.1763	0.00826554	0.721687	54
GO:0048581	biological_process	negative regulation of post-embryonic development	162/30771	196/40888	1.09828	0.00831159	0.721687	162
GO:0032269	biological_process	negative regulation of cellular protein metabolic process	120/30771	143/40888	1.11506	0.00835035	0.721687	120
GO:0061025	biological_process	membrane fusion	120/30771	143/40888	1.11506	0.00835035	0.721687	120
GO:0070972	biological_process	protein localization to endoplasmic reticulum	92/30771	108/40888	1.13193	0.00858849	0.72857	92
GO:0009891	biological_process	positive regulation of biosynthetic process	714/30771	908/40888	1.04488	0.00873221	0.72857	714
GO:0044434	cellular_component	chloroplast part	1890/30771	2446/40888	1.02674	0.00886179	0.72857	1890
GO:0032502	biological_process	developmental process	4153/30771	5425/40888	1.01722	0.00892834	0.72857	4153
GO:0022857	molecular_function	transmembrane transporter activity	2212/30771	2869/40888	1.02449	0.00900053	0.72857	2212
GO:2000241	biological_process	regulation of reproductive process	437/30771	549/40888	1.0577	0.00904368	0.72857	437
GO:0032119	biological_process	sequestering of zinc ion	29/30771	31/40888	1.24306	0.00913249	0.72857	29
GO:0043181	biological_process	vacuolar sequestering	29/30771	31/40888	1.24306	0.00913249	0.72857	29
GO:0070072	biological_process	vacuolar proton-transporting V-type ATPase complex assembly	29/30771	31/40888	1.24306	0.00913249	0.72857	29
GO:0010604	biological_process	positive regulation of macromolecule metabolic process	911/30771	1165/40888	1.03907	0.009357	0.739994	911
GO:0015318	molecular_function	inorganic molecular entity transmembrane transporter activity	1260/30771	1621/40888	1.03286	0.00947859	0.739994	1260
GO:0048856	biological_process	anatomical structure development	4043/30771	5281/40888	1.01728	0.0096448	0.739994	4043
GO:0031048	biological_process	chromatin silencing by small RNA	23/30771	24/40888	1.27342	0.00966858	0.739994	23
GO:0051173	biological_process	positive regulation of nitrogen compound metabolic process	864/30771	1104/40888	1.03992	0.00975119	0.739994	864
GO:0060548	biological_process	negative regulation of cell death	87/30771	102/40888	1.13337	0.00975137	0.739994	87
GO:0006576	biological_process	cellular biogenic amine metabolic process	130/30771	156/40888	1.10732	0.0100154	0.747869	130
GO:0044106	biological_process	cellular amine metabolic process	130/30771	156/40888	1.10732	0.0100154	0.747869	130
GO:0008156	biological_process	negative regulation of DNA replication	16/30771	16/40888	1.32878	0.0105758	0.768512	16
GO:0009641	biological_process	shade avoidance	16/30771	16/40888	1.32878	0.0105758	0.768512	16
GO:2000104	biological_process	negative regulation of DNA-dependent DNA replication	16/30771	16/40888	1.32878	0.0105758	0.768512	16
GO:0006882	biological_process	cellular zinc ion homeostasis	48/30771	54/40888	1.18114	0.0106342	0.768512	48
GO:0006275	biological_process	regulation of DNA replication	74/30771	86/40888	1.14337	0.0107035	0.768512	74
GO:0001763	biological_process	morphogenesis of a branching structure	28/30771	30/40888	1.2402	0.0114319	0.808373	28
GO:0030523	molecular_function	dihydrolipoamide S-acyltransferase activity	28/30771	30/40888	1.2402	0.0114319	0.808373	28
GO:0008320	molecular_function	protein transmembrane transporter activity	38/30771	42/40888	1.20223	0.0118774	0.820169	38
GO:0022884	molecular_function	macromolecule transmembrane transporter activity	38/30771	42/40888	1.20223	0.0118774	0.820169	38
GO:0140318	molecular_function	protein transporter activity	38/30771	42/40888	1.20223	0.0118774	0.820169	38
GO:0019238	molecular_function	cyclohydrolase activity	33/30771	36/40888	1.21805	0.0120034	0.820169	33
GO:0009081	biological_process	branched-chain amino acid metabolic process	213/30771	262/40888	1.08027	0.0120843	0.820169	213
GO:0051241	biological_process	negative regulation of multicellular organismal process	184/30771	225/40888	1.08665	0.0121259	0.820169	184
GO:0006595	biological_process	polyamine metabolic process	73/30771	85/40888	1.14119	0.0123642	0.823466	73
GO:0072505	biological_process	divalent inorganic anion homeostasis	22/30771	23/40888	1.27101	0.0123743	0.823466	22
GO:0044435	cellular_component	plastid part	1911/30771	2477/40888	1.02515	0.0124393	0.823466	1911
GO:0006415	biological_process	translational termination	47/30771	53/40888	1.17836	0.0126844	0.827945	47
GO:0009099	biological_process	valine biosynthetic process	47/30771	53/40888	1.17836	0.0126844	0.827945	47
GO:0005509	molecular_function	calcium ion binding	505/30771	639/40888	1.05013	0.0134692	0.865758	505
GO:0008324	molecular_function	cation transmembrane transporter activity	971/30771	1246/40888	1.03551	0.0136163	0.865758	971
GO:0031328	biological_process	positive regulation of cellular biosynthetic process	698/30771	890/40888	1.04212	0.0138286	0.865758	698
GO:0016471	cellular_component	vacuolar proton-transporting V-type ATPase complex	68/30771	79/40888	1.14376	0.0139879	0.865758	68
GO:0004477	molecular_function	methenyltetrahydrofolate cyclohydrolase activity	15/30771	15/40888	1.32878	0.0140546	0.865758	15
GO:0004488	molecular_function	methylenetetrahydrofolate dehydrogenase (NADP+) activity	15/30771	15/40888	1.32878	0.0140546	0.865758	15
GO:0008381	molecular_function	mechanosensitive ion channel activity	15/30771	15/40888	1.32878	0.0140546	0.865758	15
GO:0031112	biological_process	positive regulation of microtubule polymerization or depolymerization	15/30771	15/40888	1.32878	0.0140546	0.865758	15
GO:0002683	biological_process	negative regulation of immune system process	72/30771	84/40888	1.13896	0.0142599	0.865758	72
GO:0010223	biological_process	secondary shoot formation	27/30771	29/40888	1.23714	0.014284	0.865758	27
GO:0010346	biological_process	shoot axis formation	27/30771	29/40888	1.23714	0.014284	0.865758	27
GO:0044436	cellular_component	thylakoid part	402/30771	506/40888	1.05567	0.0146372	0.881441	402
GO:0048523	biological_process	negative regulation of cellular process	1073/30771	1380/40888	1.03318	0.0148459	0.88828	1073
GO:0022890	molecular_function	inorganic cation transmembrane transporter activity	886/30771	1136/40888	1.03636	0.0156377	0.889181	886
GO:0016020	cellular_component	membrane	11139/30771	14681/40888	1.0082	0.0156452	0.889181	11139
GO:0010628	biological_process	positive regulation of gene expression	702/30771	896/40888	1.04108	0.0156549	0.889181	702
GO:0003727	molecular_function	single-stranded RNA binding	163/30771	199/40888	1.0884	0.0156762	0.889181	163
GO:0004742	molecular_function	dihydrolipoyllysine-residue acetyltransferase activity	21/30771	22/40888	1.26838	0.0158136	0.889181	21
GO:0010563	biological_process	negative regulation of phosphorus metabolic process	21/30771	22/40888	1.26838	0.0158136	0.889181	21
GO:0016418	molecular_function	S-acetyltransferase activity	21/30771	22/40888	1.26838	0.0158136	0.889181	21
GO:0045839	biological_process	negative regulation of mitotic nuclear division	21/30771	22/40888	1.26838	0.0158136	0.889181	21
GO:0045936	biological_process	negative regulation of phosphate metabolic process	21/30771	22/40888	1.26838	0.0158136	0.889181	21
GO:0048280	biological_process	vesicle fusion with Golgi apparatus	21/30771	22/40888	1.26838	0.0158136	0.889181	21
GO:0009082	biological_process	branched-chain amino acid biosynthetic process	95/30771	113/40888	1.11712	0.0162154	0.903127	95
GO:0016840	molecular_function	carbon-nitrogen lyase activity	50/30771	57/40888	1.1656	0.0162551	0.903127	50
GO:0015299	molecular_function	solute:proton antiporter activity	83/30771	98/40888	1.1254	0.0166013	0.9169	83
GO:0006479	biological_process	protein methylation	102/30771	122/40888	1.11095	0.0177299	0.966663	102
GO:0008213	biological_process	protein alkylation	102/30771	122/40888	1.11095	0.0177299	0.966663	102
GO:0019903	molecular_function	protein phosphatase binding	26/30771	28/40888	1.23387	0.0178129	0.966663	26
GO:0042759	biological_process	long-chain fatty acid biosynthetic process	31/30771	34/40888	1.21154	0.018085	0.97563	31
GO:0005779	cellular_component	integral component of peroxisomal membrane	14/30771	14/40888	1.32878	0.0186777	0.97563	14
GO:0008686	molecular_function	3,4-dihydroxy-2-butanone-4-phosphate synthase activity	14/30771	14/40888	1.32878	0.0186777	0.97563	14
GO:0031231	cellular_component	intrinsic component of peroxisomal membrane	14/30771	14/40888	1.32878	0.0186777	0.97563	14
GO:0032454	molecular_function	histone demethylase activity (H3-K9 specific)	14/30771	14/40888	1.32878	0.0186777	0.97563	14
GO:0032876	biological_process	negative regulation of DNA endoreduplication	14/30771	14/40888	1.32878	0.0186777	0.97563	14
GO:0005575	cellular_component	cellular_component	27793/30771	36858/40888	1.00198	0.0187098	0.97563	27793
GO:0071489	biological_process	cellular response to red or far red light	109/30771	131/40888	1.10563	0.019085	0.989665	109
GO:0051248	biological_process	negative regulation of protein metabolic process	120/30771	145/40888	1.09968	0.0197591	1	120
GO:0000035	molecular_function	acyl binding	20/30771	21/40888	1.26551	0.0201765	1	20
GO:0001933	biological_process	negative regulation of protein phosphorylation	20/30771	21/40888	1.26551	0.0201765	1	20
GO:0017056	molecular_function	structural constituent of nuclear pore	20/30771	21/40888	1.26551	0.0201765	1	20
GO:0042326	biological_process	negative regulation of phosphorylation	20/30771	21/40888	1.26551	0.0201765	1	20
GO:0030001	biological_process	metal ion transport	420/30771	531/40888	1.05102	0.0206369	1	420
GO:0044403	biological_process	symbiotic process	259/30771	323/40888	1.0655	0.0210618	1	259
GO:0043227	cellular_component	membrane-bounded organelle	19860/30771	26276/40888	1.00432	0.0211001	1	19860
GO:0051139	molecular_function	metal ion:proton antiporter activity	61/30771	71/40888	1.14163	0.0212196	1	61
GO:0010017	biological_process	red or far-red light signaling pathway	108/30771	130/40888	1.10391	0.0213355	1	108
GO:1904680	molecular_function	peptide transmembrane transporter activity	65/30771	76/40888	1.13646	0.0215123	1	65
GO:0015144	molecular_function	carbohydrate transmembrane transporter activity	77/30771	91/40888	1.12436	0.0216195	1	77
GO:1900865	biological_process	chloroplast RNA modification	30/30771	33/40888	1.20799	0.0221273	1	30
GO:0006857	biological_process	oligopeptide transport	25/30771	27/40888	1.23036	0.0221678	1	25
GO:0043405	biological_process	regulation of MAP kinase activity	25/30771	27/40888	1.23036	0.0221678	1	25
GO:0043408	biological_process	regulation of MAPK cascade	25/30771	27/40888	1.23036	0.0221678	1	25
GO:0043231	cellular_component	intracellular membrane-bounded organelle	19563/30771	25882/40888	1.00437	0.0222975	1	19563
GO:0009309	biological_process	amine biosynthetic process	100/30771	120/40888	1.10732	0.0223399	1	100
GO:0042401	biological_process	cellular biogenic amine biosynthetic process	100/30771	120/40888	1.10732	0.0223399	1	100
GO:0015293	molecular_function	symporter activity	195/30771	241/40888	1.07516	0.0223827	1	195
GO:0048869	biological_process	cellular developmental process	1277/30771	1651/40888	1.02778	0.0230803	1	1277
GO:0034357	cellular_component	photosynthetic membrane	374/30771	472/40888	1.05289	0.0233109	1	374
GO:0016744	molecular_function	transferase activity, transferring aldehyde or ketonic groups	52/30771	60/40888	1.15161	0.0234581	1	52
GO:0051253	biological_process	negative regulation of RNA metabolic process	333/30771	419/40888	1.05605	0.0236497	1	333
GO:0055081	biological_process	anion homeostasis	84/30771	100/40888	1.11618	0.0240419	1	84
GO:0045229	biological_process	external encapsulating structure organization	534/30771	680/40888	1.04349	0.0243291	1	534
GO:0006596	biological_process	polyamine biosynthetic process	60/30771	70/40888	1.13896	0.0245178	1	60
GO:0006935	biological_process	chemotaxis	60/30771	70/40888	1.13896	0.0245178	1	60
GO:0010183	biological_process	pollen tube guidance	60/30771	70/40888	1.13896	0.0245178	1	60
GO:0042330	biological_process	taxis	60/30771	70/40888	1.13896	0.0245178	1	60
GO:0050918	biological_process	positive chemotaxis	60/30771	70/40888	1.13896	0.0245178	1	60
GO:0051168	biological_process	nuclear export	140/30771	171/40888	1.08789	0.0246136	1	140
GO:0042651	cellular_component	thylakoid membrane	373/30771	471/40888	1.05231	0.0247487	1	373
GO:0006567	biological_process	threonine catabolic process	13/30771	13/40888	1.32878	0.0248212	1	13
GO:0009902	biological_process	chloroplast relocation	13/30771	13/40888	1.32878	0.0248212	1	13
GO:0016308	molecular_function	1-phosphatidylinositol-4-phosphate 5-kinase activity	13/30771	13/40888	1.32878	0.0248212	1	13
GO:0019750	biological_process	chloroplast localization	13/30771	13/40888	1.32878	0.0248212	1	13
GO:0030864	cellular_component	cortical actin cytoskeleton	13/30771	13/40888	1.32878	0.0248212	1	13
GO:0031279	biological_process	regulation of cyclase activity	13/30771	13/40888	1.32878	0.0248212	1	13
GO:0046524	molecular_function	sucrose-phosphate synthase activity	13/30771	13/40888	1.32878	0.0248212	1	13
GO:0051644	biological_process	plastid localization	13/30771	13/40888	1.32878	0.0248212	1	13
GO:0051667	biological_process	establishment of plastid localization	13/30771	13/40888	1.32878	0.0248212	1	13
GO:0071248	biological_process	cellular response to metal ion	43/30771	49/40888	1.16608	0.0251694	1	43
GO:0009877	biological_process	nodulation	34/30771	38/40888	1.18891	0.0254356	1	34
GO:0015081	molecular_function	sodium ion transmembrane transporter activity	34/30771	38/40888	1.18891	0.0254356	1	34
GO:0003984	molecular_function	acetolactate synthase activity	19/30771	20/40888	1.26234	0.0256983	1	19
GO:0004523	molecular_function	RNA-DNA hybrid ribonuclease activity	19/30771	20/40888	1.26234	0.0256983	1	19
GO:0006469	biological_process	negative regulation of protein kinase activity	19/30771	20/40888	1.26234	0.0256983	1	19
GO:0009310	biological_process	amine catabolic process	19/30771	20/40888	1.26234	0.0256983	1	19
GO:0033673	biological_process	negative regulation of kinase activity	19/30771	20/40888	1.26234	0.0256983	1	19
GO:0042402	biological_process	cellular biogenic amine catabolic process	19/30771	20/40888	1.26234	0.0256983	1	19
GO:0048639	biological_process	positive regulation of developmental growth	19/30771	20/40888	1.26234	0.0256983	1	19
GO:0071901	biological_process	negative regulation of protein serine/threonine kinase activity	19/30771	20/40888	1.26234	0.0256983	1	19
GO:0015075	molecular_function	ion transmembrane transporter activity	1340/30771	1735/40888	1.02627	0.0265731	1	1340
GO:0009068	biological_process	aspartate family amino acid catabolic process	29/30771	32/40888	1.20421	0.0270111	1	29
GO:0030247	molecular_function	polysaccharide binding	83/30771	99/40888	1.11403	0.027161	1	83
GO:0051348	biological_process	negative regulation of transferase activity	24/30771	26/40888	1.22657	0.0275264	1	24
GO:0080140	biological_process	regulation of jasmonic acid metabolic process	24/30771	26/40888	1.22657	0.0275264	1	24
GO:0031301	cellular_component	integral component of organelle membrane	293/30771	368/40888	1.05797	0.0276726	1	293
GO:0033365	biological_process	protein localization to organelle	398/30771	504/40888	1.04932	0.0277467	1	398
GO:0009733	biological_process	response to auxin	528/30771	673/40888	1.04249	0.0278121	1	528
GO:1903338	biological_process	regulation of cell wall organization or biogenesis	55/30771	64/40888	1.14192	0.0279377	1	55
GO:0006405	biological_process	RNA export from nucleus	135/30771	165/40888	1.08719	0.0280198	1	135
GO:0015078	molecular_function	proton transmembrane transporter activity	498/30771	634/40888	1.04374	0.0280219	1	498
GO:0009646	biological_process	response to absence of light	71/30771	84/40888	1.12314	0.0282145	1	71
GO:0044419	biological_process	interspecies interaction between organisms	279/30771	350/40888	1.05923	0.0282193	1	279
GO:0016790	molecular_function	thiolester hydrolase activity	59/30771	69/40888	1.13621	0.0282751	1	59
GO:1902679	biological_process	negative regulation of RNA biosynthetic process	330/30771	416/40888	1.05408	0.0285379	1	330
GO:1903507	biological_process	negative regulation of nucleic acid-templated transcription	330/30771	416/40888	1.05408	0.0285379	1	330
GO:0010200	biological_process	response to chitin	131/30771	160/40888	1.08794	0.0289933	1	131
GO:0043414	biological_process	macromolecule methylation	251/30771	314/40888	1.06218	0.0291447	1	251
GO:0051238	biological_process	sequestering of metal ion	42/30771	48/40888	1.16269	0.0297135	1	42
GO:0031969	cellular_component	chloroplast membrane	393/30771	498/40888	1.04862	0.030443	1	393
GO:0009617	biological_process	response to bacterium	827/30771	1064/40888	1.0328	0.0307546	1	827
GO:0009639	biological_process	response to red or far red light	250/30771	313/40888	1.06133	0.0312585	1	250
GO:0071554	biological_process	cell wall organization or biogenesis	644/30771	825/40888	1.03726	0.0313324	1	644
GO:0042170	cellular_component	plastid membrane	402/30771	510/40888	1.04739	0.0322771	1	402
GO:0005451	molecular_function	monovalent cation:proton antiporter activity	66/30771	78/40888	1.12436	0.0323947	1	66
GO:0071555	biological_process	cell wall organization	495/30771	631/40888	1.04239	0.0325811	1	495
GO:0003862	molecular_function	3-isopropylmalate dehydrogenase activity	18/30771	19/40888	1.25885	0.0326695	1	18
GO:0006353	biological_process	DNA-templated transcription, termination	18/30771	19/40888	1.25885	0.0326695	1	18
GO:0008379	molecular_function	thioredoxin peroxidase activity	28/30771	31/40888	1.20019	0.0328929	1	28
GO:0009962	biological_process	regulation of flavonoid biosynthetic process	28/30771	31/40888	1.20019	0.0328929	1	28
GO:0016571	biological_process	histone methylation	89/30771	107/40888	1.10525	0.0329361	1	89
GO:0000454	biological_process	snoRNA guided rRNA pseudouridine synthesis	12/30771	12/40888	1.32878	0.0329851	1	12
GO:0004366	molecular_function	glycerol-3-phosphate O-acyltransferase activity	12/30771	12/40888	1.32878	0.0329851	1	12
GO:0035652	biological_process	clathrin-coated vesicle cargo loading	12/30771	12/40888	1.32878	0.0329851	1	12
GO:0050378	molecular_function	UDP-glucuronate 4-epimerase activity	12/30771	12/40888	1.32878	0.0329851	1	12
GO:0071588	biological_process	hydrogen peroxide mediated signaling pathway	12/30771	12/40888	1.32878	0.0329851	1	12
GO:0102420	molecular_function	sn-1-glycerol-3-phosphate C16:0-DCA-CoA acyl transferase activity	12/30771	12/40888	1.32878	0.0329851	1	12
GO:0004602	molecular_function	glutathione peroxidase activity	37/30771	42/40888	1.1706	0.0331857	1	37
GO:0005801	cellular_component	cis-Golgi network	37/30771	42/40888	1.1706	0.0331857	1	37
GO:0080141	biological_process	regulation of jasmonic acid biosynthetic process	23/30771	25/40888	1.22248	0.0340998	1	23
GO:0042545	biological_process	cell wall modification	111/30771	135/40888	1.09256	0.0342571	1	111
GO:0045892	biological_process	negative regulation of transcription, DNA-templated	320/30771	404/40888	1.0525	0.0347707	1	320
GO:0071004	cellular_component	U2-type prespliceosome	41/30771	47/40888	1.15915	0.0349977	1	41
GO:0071010	cellular_component	prespliceosome	41/30771	47/40888	1.15915	0.0349977	1	41
GO:0009893	biological_process	positive regulation of metabolic process	1062/30771	1373/40888	1.0278	0.035361	1	1062
GO:0031300	cellular_component	intrinsic component of organelle membrane	296/30771	373/40888	1.05448	0.0353766	1	296
GO:0048589	biological_process	developmental growth	664/30771	852/40888	1.03558	0.0355067	1	664
GO:0009986	cellular_component	cell surface	92/30771	111/40888	1.10133	0.0358835	1	92
GO:0016635	molecular_function	oxidoreductase activity, acting on the CH-CH group of donors, quinone or related compound as acceptor	45/30771	52/40888	1.14991	0.0362048	1	45
GO:0008283	biological_process	cell population proliferation	32/30771	36/40888	1.18114	0.0367134	1	32
GO:0030599	molecular_function	pectinesterase activity	32/30771	36/40888	1.18114	0.0367134	1	32
GO:0045330	molecular_function	aspartyl esterase activity	32/30771	36/40888	1.18114	0.0367134	1	32
GO:0019722	biological_process	calcium-mediated signaling	49/30771	57/40888	1.14229	0.0369402	1	49
GO:0051704	biological_process	multi-organism process	2527/30771	3301/40888	1.01722	0.0371317	1	2527
GO:0045851	biological_process	pH reduction	53/30771	62/40888	1.1359	0.0373071	1	53
GO:0009941	cellular_component	chloroplast envelope	854/30771	1101/40888	1.03068	0.0377732	1	854
GO:0032501	biological_process	multicellular organismal process	3904/30771	5119/40888	1.0134	0.0379887	1	3904
GO:0048580	biological_process	regulation of post-embryonic development	554/30771	709/40888	1.03829	0.0387402	1	554
GO:0015077	molecular_function	monovalent inorganic cation transmembrane transporter activity	567/30771	726/40888	1.03777	0.0389596	1	567
GO:0009535	cellular_component	chloroplast thylakoid membrane	358/30771	454/40888	1.04781	0.0399357	1	358
GO:0055035	cellular_component	plastid thylakoid membrane	358/30771	454/40888	1.04781	0.0399357	1	358
GO:0048579	biological_process	negative regulation of long-day photoperiodism, flowering	27/30771	30/40888	1.19591	0.039953	1	27
GO:0033177	cellular_component	proton-transporting two-sector ATPase complex, proton-transporting domain	102/30771	124/40888	1.09303	0.0405076	1	102
GO:0043621	molecular_function	protein self-association	170/30771	211/40888	1.07058	0.0407415	1	170
GO:0070071	biological_process	proton-transporting two-sector ATPase complex assembly	40/30771	46/40888	1.15546	0.0411238	1	40
GO:0005643	cellular_component	nuclear pore	87/30771	105/40888	1.10099	0.0412178	1	87
GO:0010600	biological_process	regulation of auxin biosynthetic process	17/30771	18/40888	1.25496	0.0414459	1	17
GO:0030026	biological_process	cellular manganese ion homeostasis	17/30771	18/40888	1.25496	0.0414459	1	17
GO:0070919	biological_process	production of siRNA involved in chromatin silencing by small RNA	17/30771	18/40888	1.25496	0.0414459	1	17
GO:0051239	biological_process	regulation of multicellular organismal process	848/30771	1094/40888	1.02999	0.0418429	1	848
GO:0032580	cellular_component	Golgi cisterna membrane	44/30771	51/40888	1.1464	0.0422138	1	44
GO:0045930	biological_process	negative regulation of mitotic cell cycle	44/30771	51/40888	1.1464	0.0422138	1	44
GO:0009960	biological_process	endosperm development	48/30771	56/40888	1.13896	0.0427911	1	48
GO:0043086	biological_process	negative regulation of catalytic activity	56/30771	66/40888	1.12745	0.042858	1	56
GO:0019748	biological_process	secondary metabolic process	360/30771	457/40888	1.04674	0.0430368	1	360
GO:0004656	molecular_function	procollagen-proline 4-dioxygenase activity	11/30771	11/40888	1.32878	0.043834	1	11
GO:0009647	biological_process	skotomorphogenesis	11/30771	11/40888	1.32878	0.043834	1	11
GO:0018195	biological_process	peptidyl-arginine modification	11/30771	11/40888	1.32878	0.043834	1	11
GO:0018216	biological_process	peptidyl-arginine methylation	11/30771	11/40888	1.32878	0.043834	1	11
GO:0018401	biological_process	peptidyl-proline hydroxylation to 4-hydroxy-L-proline	11/30771	11/40888	1.32878	0.043834	1	11
GO:0019471	biological_process	4-hydroxyproline metabolic process	11/30771	11/40888	1.32878	0.043834	1	11
GO:0019798	molecular_function	procollagen-proline dioxygenase activity	11/30771	11/40888	1.32878	0.043834	1	11
GO:0030267	molecular_function	glyoxylate reductase (NADP) activity	11/30771	11/40888	1.32878	0.043834	1	11
GO:0031545	molecular_function	peptidyl-proline 4-dioxygenase activity	11/30771	11/40888	1.32878	0.043834	1	11
GO:0043971	biological_process	histone H3-K18 acetylation	11/30771	11/40888	1.32878	0.043834	1	11
GO:0046794	biological_process	transport of virus	11/30771	11/40888	1.32878	0.043834	1	11
GO:0051346	biological_process	negative regulation of hydrolase activity	11/30771	11/40888	1.32878	0.043834	1	11
GO:1901528	biological_process	hydrogen peroxide mediated signaling pathway involved in stomatal movement	11/30771	11/40888	1.32878	0.043834	1	11
GO:0005102	molecular_function	signaling receptor binding	90/30771	109/40888	1.09716	0.0446059	1	90
GO:0045934	biological_process	negative regulation of nucleobase-containing compound metabolic process	366/30771	465/40888	1.04588	0.0446574	1	366
GO:2000026	biological_process	regulation of multicellular organismal development	788/30771	1016/40888	1.03059	0.0448686	1	788
GO:0050793	biological_process	regulation of developmental process	1096/30771	1420/40888	1.0256	0.0454905	1	1096
GO:0009706	cellular_component	chloroplast inner membrane	151/30771	187/40888	1.07297	0.0457123	1	151
GO:0072665	biological_process	protein localization to vacuole	71/30771	85/40888	1.10993	0.0457387	1	71
GO:0072666	biological_process	establishment of protein localization to vacuole	71/30771	85/40888	1.10993	0.0457387	1	71
GO:0006072	biological_process	glycerol-3-phosphate metabolic process	35/30771	40/40888	1.16269	0.0465683	1	35
GO:0006189	biological_process	'de novo' IMP biosynthetic process	35/30771	40/40888	1.16269	0.0465683	1	35
GO:0052646	biological_process	alditol phosphate metabolic process	35/30771	40/40888	1.16269	0.0465683	1	35
GO:0051336	biological_process	regulation of hydrolase activity	67/30771	80/40888	1.11286	0.0467429	1	67
GO:0009526	cellular_component	plastid envelope	877/30771	1133/40888	1.02855	0.0469731	1	877
GO:0043624	biological_process	cellular protein complex disassembly	122/30771	150/40888	1.08074	0.0480766	1	122
GO:0016149	molecular_function	translation release factor activity, codon specific	26/30771	29/40888	1.19132	0.0483971	1	26
GO:0040007	biological_process	growth	776/30771	1001/40888	1.03011	0.0489091	1	776
GO:0042644	cellular_component	chloroplast nucleoid	43/30771	50/40888	1.14275	0.0491036	1	43
GO:0042646	cellular_component	plastid nucleoid	43/30771	50/40888	1.14275	0.0491036	1	43
GO:0048571	biological_process	long-day photoperiodism	43/30771	50/40888	1.14275	0.0491036	1	43
GO:0007035	biological_process	vacuolar acidification	51/30771	60/40888	1.12947	0.0493976	1	51
GO:0009295	cellular_component	nucleoid	51/30771	60/40888	1.12947	0.0493976	1	51
GO:0031977	cellular_component	thylakoid lumen	51/30771	60/40888	1.12947	0.0493976	1	51
GO:0046040	biological_process	IMP metabolic process	51/30771	60/40888	1.12947	0.0493976	1	51
GO:0051452	biological_process	intracellular pH reduction	51/30771	60/40888	1.12947	0.0493976	1	51
GO:0005685	cellular_component	U1 snRNP	47/30771	55/40888	1.13551	0.0494561	1	47
GO:0016706	molecular_function	2-oxoglutarate-dependent dioxygenase activity	47/30771	55/40888	1.13551	0.0494561	1	47
GO:0048522	biological_process	positive regulation of cellular process	1402/30771	1823/40888	1.02192	0.0495329	1	1402
GO:0000271	biological_process	polysaccharide biosynthetic process	314/30771	398/40888	1.04834	0.0495541	1	314
GO:0015298	molecular_function	solute:cation antiporter activity	96/30771	117/40888	1.09028	0.0513981	1	96
GO:0000775	cellular_component	chromosome, centromeric region	70/30771	84/40888	1.10732	0.0515055	1	70
GO:0009269	biological_process	response to desiccation	21/30771	23/40888	1.21324	0.0519267	1	21
GO:0042407	biological_process	cristae formation	21/30771	23/40888	1.21324	0.0519267	1	21
GO:0048519	biological_process	negative regulation of biological process	1877/30771	2449/40888	1.01843	0.0523989	1	1877
GO:0006566	biological_process	threonine metabolic process	30/30771	34/40888	1.17246	0.0524448	1	30
GO:0046274	biological_process	lignin catabolic process	30/30771	34/40888	1.17246	0.0524448	1	30
GO:0052716	molecular_function	hydroquinone:oxygen oxidoreductase activity	30/30771	34/40888	1.17246	0.0524448	1	30
GO:0005351	molecular_function	carbohydrate:proton symporter activity	16/30771	17/40888	1.25062	0.0524608	1	16
GO:0005402	molecular_function	carbohydrate:cation symporter activity	16/30771	17/40888	1.25062	0.0524608	1	16
GO:0007094	biological_process	mitotic spindle assembly checkpoint	16/30771	17/40888	1.25062	0.0524608	1	16
GO:0015976	biological_process	carbon utilization	16/30771	17/40888	1.25062	0.0524608	1	16
GO:0031577	biological_process	spindle checkpoint	16/30771	17/40888	1.25062	0.0524608	1	16
GO:0033046	biological_process	negative regulation of sister chromatid segregation	16/30771	17/40888	1.25062	0.0524608	1	16
GO:0033048	biological_process	negative regulation of mitotic sister chromatid segregation	16/30771	17/40888	1.25062	0.0524608	1	16
GO:0043407	biological_process	negative regulation of MAP kinase activity	16/30771	17/40888	1.25062	0.0524608	1	16
GO:0043409	biological_process	negative regulation of MAPK cascade	16/30771	17/40888	1.25062	0.0524608	1	16
GO:0045841	biological_process	negative regulation of mitotic metaphase/anaphase transition	16/30771	17/40888	1.25062	0.0524608	1	16
GO:0051195	biological_process	negative regulation of cofactor metabolic process	16/30771	17/40888	1.25062	0.0524608	1	16
GO:0051985	biological_process	negative regulation of chromosome segregation	16/30771	17/40888	1.25062	0.0524608	1	16
GO:0071173	biological_process	spindle assembly checkpoint	16/30771	17/40888	1.25062	0.0524608	1	16
GO:0071174	biological_process	mitotic spindle checkpoint	16/30771	17/40888	1.25062	0.0524608	1	16
GO:1901618	molecular_function	organic hydroxy compound transmembrane transporter activity	16/30771	17/40888	1.25062	0.0524608	1	16
GO:1902100	biological_process	negative regulation of metaphase/anaphase transition of cell cycle	16/30771	17/40888	1.25062	0.0524608	1	16
GO:1905819	biological_process	negative regulation of chromosome separation	16/30771	17/40888	1.25062	0.0524608	1	16
GO:2000816	biological_process	negative regulation of mitotic sister chromatid separation	16/30771	17/40888	1.25062	0.0524608	1	16
GO:0004197	molecular_function	cysteine-type endopeptidase activity	191/30771	239/40888	1.06191	0.0525129	1	191
GO:0006611	biological_process	protein export from nucleus	121/30771	149/40888	1.07908	0.0526425	1	121
GO:0030968	biological_process	endoplasmic reticulum unfolded protein response	121/30771	149/40888	1.07908	0.0526425	1	121
GO:0016050	biological_process	vesicle organization	249/30771	314/40888	1.05372	0.0526531	1	249
GO:0031325	biological_process	positive regulation of cellular metabolic process	944/30771	1222/40888	1.02649	0.0531667	1	944
GO:0010941	biological_process	regulation of cell death	225/30771	283/40888	1.05645	0.0534208	1	225
GO:0070838	biological_process	divalent metal ion transport	225/30771	283/40888	1.05645	0.0534208	1	225
GO:0046185	biological_process	aldehyde catabolic process	62/30771	74/40888	1.11331	0.0539824	1	62
GO:0072511	biological_process	divalent inorganic cation transport	228/30771	287/40888	1.05562	0.0548641	1	228
GO:0008361	biological_process	regulation of cell size	58/30771	69/40888	1.11695	0.0550589	1	58
GO:0031201	cellular_component	SNARE complex	58/30771	69/40888	1.11695	0.0550589	1	58
GO:0031984	cellular_component	organelle subcompartment	1105/30771	1434/40888	1.02392	0.0565017	1	1105
GO:0001708	biological_process	cell fate specification	42/30771	49/40888	1.13896	0.0569781	1	42
GO:0015294	molecular_function	solute:cation symporter activity	42/30771	49/40888	1.13896	0.0569781	1	42
GO:0019902	molecular_function	phosphatase binding	42/30771	49/40888	1.13896	0.0569781	1	42
GO:0000221	cellular_component	vacuolar proton-transporting V-type ATPase, V1 domain	10/30771	10/40888	1.32878	0.0582506	1	10
GO:0004664	molecular_function	prephenate dehydratase activity	10/30771	10/40888	1.32878	0.0582506	1	10
GO:0004794	molecular_function	L-threonine ammonia-lyase activity	10/30771	10/40888	1.32878	0.0582506	1	10
GO:0010239	biological_process	chloroplast mRNA processing	10/30771	10/40888	1.32878	0.0582506	1	10
GO:0031113	biological_process	regulation of microtubule polymerization	10/30771	10/40888	1.32878	0.0582506	1	10
GO:0031116	biological_process	positive regulation of microtubule polymerization	10/30771	10/40888	1.32878	0.0582506	1	10
GO:0032794	molecular_function	GTPase activating protein binding	10/30771	10/40888	1.32878	0.0582506	1	10
GO:0034969	biological_process	histone arginine methylation	10/30771	10/40888	1.32878	0.0582506	1	10
GO:0043972	biological_process	histone H3-K23 acetylation	10/30771	10/40888	1.32878	0.0582506	1	10
GO:0046923	molecular_function	ER retention sequence binding	10/30771	10/40888	1.32878	0.0582506	1	10
GO:0047769	molecular_function	arogenate dehydratase activity	10/30771	10/40888	1.32878	0.0582506	1	10
GO:0048259	biological_process	regulation of receptor-mediated endocytosis	10/30771	10/40888	1.32878	0.0582506	1	10
GO:0051782	biological_process	negative regulation of cell division	10/30771	10/40888	1.32878	0.0582506	1	10
GO:1901881	biological_process	positive regulation of protein depolymerization	10/30771	10/40888	1.32878	0.0582506	1	10
GO:1990298	cellular_component	bub1-bub3 complex	10/30771	10/40888	1.32878	0.0582506	1	10
GO:2000369	biological_process	regulation of clathrin-dependent endocytosis	10/30771	10/40888	1.32878	0.0582506	1	10
GO:0008483	molecular_function	transaminase activity	141/30771	175/40888	1.07062	0.0584087	1	141
GO:1990825	molecular_function	sequence-specific mRNA binding	25/30771	28/40888	1.18641	0.0584579	1	25
GO:0016032	biological_process	viral process	186/30771	233/40888	1.06075	0.0587447	1	186
GO:0071166	biological_process	ribonucleoprotein complex localization	116/30771	143/40888	1.07789	0.0599019	1	116
GO:0071426	biological_process	ribonucleoprotein complex export from nucleus	116/30771	143/40888	1.07789	0.0599019	1	116
GO:0022411	biological_process	cellular component disassembly	230/30771	290/40888	1.05386	0.0600629	1	230
GO:0006888	biological_process	endoplasmic reticulum to Golgi vesicle-mediated transport	213/30771	268/40888	1.05609	0.0601651	1	213
GO:0009826	biological_process	unidimensional cell growth	459/30771	588/40888	1.03726	0.0604721	1	459
GO:0032984	biological_process	protein-containing complex disassembly	189/30771	237/40888	1.05966	0.0605718	1	189
GO:0019904	molecular_function	protein domain specific binding	76/30771	92/40888	1.09769	0.0609584	1	76
GO:0033179	cellular_component	proton-transporting V-type ATPase, V0 domain	87/30771	106/40888	1.09061	0.0611106	1	87
GO:0032182	molecular_function	ubiquitin-like protein binding	105/30771	129/40888	1.08157	0.0615272	1	105
GO:0043130	molecular_function	ubiquitin binding	105/30771	129/40888	1.08157	0.0615272	1	105
GO:0006885	biological_process	regulation of pH	112/30771	138/40888	1.07843	0.0623328	1	112
GO:0010344	biological_process	seed oilbody biogenesis	29/30771	33/40888	1.16772	0.0624181	1	29
GO:0035265	biological_process	organ growth	29/30771	33/40888	1.16772	0.0624181	1	29
GO:0010393	biological_process	galacturonan metabolic process	133/30771	165/40888	1.07108	0.0633655	1	133
GO:0010228	biological_process	vegetative to reproductive phase transition of meristem	246/30771	311/40888	1.05106	0.0635003	1	246
GO:0005215	molecular_function	transporter activity	2358/30771	3086/40888	1.01532	0.0635112	1	2358
GO:0003917	molecular_function	DNA topoisomerase type I activity	20/30771	22/40888	1.20799	0.0638054	1	20
GO:0004766	molecular_function	spermidine synthase activity	20/30771	22/40888	1.20799	0.0638054	1	20
GO:0031405	molecular_function	lipoic acid binding	20/30771	22/40888	1.20799	0.0638054	1	20
GO:0019187	molecular_function	beta-1,4-mannosyltransferase activity	33/30771	38/40888	1.15394	0.0646574	1	33
GO:0031110	biological_process	regulation of microtubule polymerization or depolymerization	33/30771	38/40888	1.15394	0.0646574	1	33
GO:0051753	molecular_function	mannan synthase activity	33/30771	38/40888	1.15394	0.0646574	1	33
GO:0051879	molecular_function	Hsp90 protein binding	33/30771	38/40888	1.15394	0.0646574	1	33
GO:0012507	cellular_component	ER to Golgi transport vesicle membrane	68/30771	82/40888	1.10192	0.064949	1	68
GO:0051259	biological_process	protein complex oligomerization	115/30771	142/40888	1.07613	0.0654752	1	115
GO:0000220	cellular_component	vacuolar proton-transporting V-type ATPase, V0 domain	37/30771	43/40888	1.14337	0.0657158	1	37
GO:0008177	molecular_function	succinate dehydrogenase (ubiquinone) activity	37/30771	43/40888	1.14337	0.0657158	1	37
GO:0070070	biological_process	proton-transporting V-type ATPase complex assembly	37/30771	43/40888	1.14337	0.0657158	1	37
GO:0007275	biological_process	multicellular organism development	3556/30771	4669/40888	1.01203	0.0657992	1	3556
GO:0031503	biological_process	protein-containing complex localization	143/30771	178/40888	1.06751	0.0658794	1	143
GO:0015368	molecular_function	calcium:cation antiporter activity	41/30771	48/40888	1.135	0.065948	1	41
GO:0015369	molecular_function	calcium:proton antiporter activity	41/30771	48/40888	1.135	0.065948	1	41
GO:0015706	biological_process	nitrate transport	41/30771	48/40888	1.135	0.065948	1	41
GO:0043243	biological_process	positive regulation of protein complex disassembly	41/30771	48/40888	1.135	0.065948	1	41
GO:0051051	biological_process	negative regulation of transport	41/30771	48/40888	1.135	0.065948	1	41
GO:0003906	molecular_function	DNA-(apurinic or apyrimidinic site) endonuclease activity	15/30771	16/40888	1.24573	0.0662372	1	15
GO:0009700	biological_process	indole phytoalexin biosynthetic process	15/30771	16/40888	1.24573	0.0662372	1	15
GO:0010120	biological_process	camalexin biosynthetic process	15/30771	16/40888	1.24573	0.0662372	1	15
GO:0034051	biological_process	negative regulation of plant-type hypersensitive response	15/30771	16/40888	1.24573	0.0662372	1	15
GO:0044766	biological_process	multi-organism transport	15/30771	16/40888	1.24573	0.0662372	1	15
GO:0046217	biological_process	indole phytoalexin metabolic process	15/30771	16/40888	1.24573	0.0662372	1	15
GO:0048448	biological_process	stamen morphogenesis	15/30771	16/40888	1.24573	0.0662372	1	15
GO:0048574	biological_process	long-day photoperiodism, flowering	15/30771	16/40888	1.24573	0.0662372	1	15
GO:0051026	biological_process	chiasma assembly	15/30771	16/40888	1.24573	0.0662372	1	15
GO:0052317	biological_process	camalexin metabolic process	15/30771	16/40888	1.24573	0.0662372	1	15
GO:1901402	biological_process	negative regulation of tetrapyrrole metabolic process	15/30771	16/40888	1.24573	0.0662372	1	15
GO:1901464	biological_process	negative regulation of tetrapyrrole biosynthetic process	15/30771	16/40888	1.24573	0.0662372	1	15
GO:1902325	biological_process	negative regulation of chlorophyll biosynthetic process	15/30771	16/40888	1.24573	0.0662372	1	15
GO:1902579	biological_process	multi-organism localization	15/30771	16/40888	1.24573	0.0662372	1	15
GO:0034637	biological_process	cellular carbohydrate biosynthetic process	332/30771	423/40888	1.04292	0.0663688	1	332
GO:0005976	biological_process	polysaccharide metabolic process	525/30771	675/40888	1.0335	0.0674599	1	525
GO:0051783	biological_process	regulation of nuclear division	60/30771	72/40888	1.10732	0.0688622	1	60
GO:0071944	cellular_component	cell periphery	6276/30771	8270/40888	1.0084	0.0696294	1	6276
GO:0030134	cellular_component	COPII-coated ER to Golgi transport vesicle	82/30771	100/40888	1.0896	0.0702334	1	82
GO:0000139	cellular_component	Golgi membrane	929/30771	1205/40888	1.02443	0.0702435	1	929
GO:0003985	molecular_function	acetyl-CoA C-acetyltransferase activity	24/30771	27/40888	1.18114	0.0703953	1	24
GO:0015853	biological_process	adenine transport	24/30771	27/40888	1.18114	0.0703953	1	24
GO:0015854	biological_process	guanine transport	24/30771	27/40888	1.18114	0.0703953	1	24
GO:0016307	molecular_function	phosphatidylinositol phosphate kinase activity	24/30771	27/40888	1.18114	0.0703953	1	24
GO:0016453	molecular_function	C-acetyltransferase activity	24/30771	27/40888	1.18114	0.0703953	1	24
GO:0034975	biological_process	protein folding in endoplasmic reticulum	24/30771	27/40888	1.18114	0.0703953	1	24
GO:0071365	biological_process	cellular response to auxin stimulus	344/30771	439/40888	1.04123	0.0707135	1	344
GO:0032509	biological_process	endosome transport via multivesicular body sorting pathway	56/30771	67/40888	1.11063	0.0707193	1	56
GO:0071985	biological_process	multivesicular body sorting pathway	56/30771	67/40888	1.11063	0.0707193	1	56
GO:0007059	biological_process	chromosome segregation	142/30771	177/40888	1.06603	0.0712802	1	142
GO:0016769	molecular_function	transferase activity, transferring nitrogenous groups	142/30771	177/40888	1.06603	0.0712802	1	142
GO:0032268	biological_process	regulation of cellular protein metabolic process	714/30771	923/40888	1.0279	0.0715968	1	714
GO:0009734	biological_process	auxin-activated signaling pathway	327/30771	417/40888	1.042	0.0724975	1	327
GO:0016043	biological_process	cellular component organization	4807/30771	6326/40888	1.00972	0.0732395	1	4807
GO:0009528	cellular_component	plastid inner membrane	152/30771	190/40888	1.06303	0.0733525	1	152
GO:0016469	cellular_component	proton-transporting two-sector ATPase complex	287/30771	365/40888	1.04482	0.0733746	1	287
GO:0009536	cellular_component	plastid	4519/30771	5945/40888	1.01005	0.0737532	1	4519
GO:0004724	molecular_function	magnesium-dependent protein serine/threonine phosphatase activity	48/30771	57/40888	1.11898	0.073996	1	48
GO:0051246	biological_process	regulation of protein metabolic process	790/30771	1023/40888	1.02614	0.0740148	1	790
GO:0017004	biological_process	cytochrome complex assembly	28/30771	32/40888	1.16269	0.0740654	1	28
GO:0031624	molecular_function	ubiquitin conjugating enzyme binding	28/30771	32/40888	1.16269	0.0740654	1	28
GO:0044070	biological_process	regulation of anion transport	28/30771	32/40888	1.16269	0.0740654	1	28
GO:0030004	biological_process	cellular monovalent inorganic cation homeostasis	110/30771	136/40888	1.07475	0.0744859	1	110
GO:0009753	biological_process	response to jasmonic acid	240/30771	304/40888	1.04904	0.0745357	1	240
GO:0009658	biological_process	chloroplast organization	213/30771	269/40888	1.05216	0.0749998	1	213
GO:0006814	biological_process	sodium ion transport	44/30771	52/40888	1.12436	0.0752635	1	44
GO:0031400	biological_process	negative regulation of protein modification process	44/30771	52/40888	1.12436	0.0752635	1	44
GO:0030976	molecular_function	thiamine pyrophosphate binding	32/30771	37/40888	1.14922	0.0758623	1	32
GO:0006004	biological_process	fucose metabolic process	40/30771	47/40888	1.13088	0.0761301	1	40
GO:0045273	cellular_component	respiratory chain complex II	40/30771	47/40888	1.13088	0.0761301	1	40
GO:0009543	cellular_component	chloroplast thylakoid lumen	36/30771	42/40888	1.13896	0.0764173	1	36
GO:0010162	biological_process	seed dormancy process	36/30771	42/40888	1.13896	0.0764173	1	36
GO:0022611	biological_process	dormancy process	36/30771	42/40888	1.13896	0.0764173	1	36
GO:0031978	cellular_component	plastid thylakoid lumen	36/30771	42/40888	1.13896	0.0764173	1	36
GO:0030641	biological_process	regulation of cellular pH	99/30771	122/40888	1.07828	0.0770671	1	99
GO:0051453	biological_process	regulation of intracellular pH	99/30771	122/40888	1.07828	0.0770671	1	99
GO:0003942	molecular_function	N-acetyl-gamma-glutamyl-phosphate reductase activity	9/30771	9/40888	1.32878	0.077408	1	9
GO:0004814	molecular_function	arginine-tRNA ligase activity	9/30771	9/40888	1.32878	0.077408	1	9
GO:0005353	molecular_function	fructose transmembrane transporter activity	9/30771	9/40888	1.32878	0.077408	1	9
GO:0005869	cellular_component	dynactin complex	9/30771	9/40888	1.32878	0.077408	1	9
GO:0005948	cellular_component	acetolactate synthase complex	9/30771	9/40888	1.32878	0.077408	1	9
GO:0006420	biological_process	arginyl-tRNA aminoacylation	9/30771	9/40888	1.32878	0.077408	1	9
GO:0008265	molecular_function	Mo-molybdopterin cofactor sulfurase activity	9/30771	9/40888	1.32878	0.077408	1	9
GO:0009106	biological_process	lipoate metabolic process	9/30771	9/40888	1.32878	0.077408	1	9
GO:0009107	biological_process	lipoate biosynthetic process	9/30771	9/40888	1.32878	0.077408	1	9
GO:0009538	cellular_component	photosystem I reaction center	9/30771	9/40888	1.32878	0.077408	1	9
GO:0010047	biological_process	fruit dehiscence	9/30771	9/40888	1.32878	0.077408	1	9
GO:0010269	biological_process	response to selenium ion	9/30771	9/40888	1.32878	0.077408	1	9
GO:0016618	molecular_function	hydroxypyruvate reductase activity	9/30771	9/40888	1.32878	0.077408	1	9
GO:0017077	molecular_function	oxidative phosphorylation uncoupler activity	9/30771	9/40888	1.32878	0.077408	1	9
GO:0048455	biological_process	stamen formation	9/30771	9/40888	1.32878	0.077408	1	9
GO:0072318	biological_process	clathrin coat disassembly	9/30771	9/40888	1.32878	0.077408	1	9
GO:0072319	biological_process	vesicle uncoating	9/30771	9/40888	1.32878	0.077408	1	9
GO:0080119	biological_process	ER body organization	9/30771	9/40888	1.32878	0.077408	1	9
GO:0097264	biological_process	self proteolysis	9/30771	9/40888	1.32878	0.077408	1	9
GO:0102867	molecular_function	molybdenum cofactor sulfurtransferase activity	9/30771	9/40888	1.32878	0.077408	1	9
GO:0043069	biological_process	negative regulation of programmed cell death	59/30771	71/40888	1.1042	0.0775334	1	59
GO:0004435	molecular_function	phosphatidylinositol phospholipase C activity	19/30771	21/40888	1.20223	0.078156	1	19
GO:0004806	molecular_function	triglyceride lipase activity	19/30771	21/40888	1.20223	0.078156	1	19
GO:0009673	molecular_function	low-affinity phosphate transmembrane transporter activity	19/30771	21/40888	1.20223	0.078156	1	19
GO:0035064	molecular_function	methylated histone binding	19/30771	21/40888	1.20223	0.078156	1	19
GO:0048354	biological_process	mucilage biosynthetic process involved in seed coat development	19/30771	21/40888	1.20223	0.078156	1	19
GO:0140034	molecular_function	methylation-dependent protein binding	19/30771	21/40888	1.20223	0.078156	1	19
GO:0044421	cellular_component	extracellular region part	219/30771	277/40888	1.05055	0.0785376	1	219
GO:0009751	biological_process	response to salicylic acid	168/30771	211/40888	1.05799	0.0797172	1	168
GO:0055067	biological_process	monovalent inorganic cation homeostasis	168/30771	211/40888	1.05799	0.0797172	1	168
GO:0031146	biological_process	SCF-dependent proteasomal ubiquitin-dependent protein catabolic process	55/30771	66/40888	1.10732	0.0798861	1	55
GO:1903827	biological_process	regulation of cellular protein localization	55/30771	66/40888	1.10732	0.0798861	1	55
GO:0006997	biological_process	nucleus organization	66/30771	80/40888	1.09625	0.0812755	1	66
GO:0017148	biological_process	negative regulation of translation	66/30771	80/40888	1.09625	0.0812755	1	66
GO:0034249	biological_process	negative regulation of cellular amide metabolic process	66/30771	80/40888	1.09625	0.0812755	1	66
GO:0045489	biological_process	pectin biosynthetic process	66/30771	80/40888	1.09625	0.0812755	1	66
GO:0006636	biological_process	unsaturated fatty acid biosynthetic process	116/30771	144/40888	1.07041	0.0813176	1	116
GO:0033559	biological_process	unsaturated fatty acid metabolic process	116/30771	144/40888	1.07041	0.0813176	1	116
GO:0040008	biological_process	regulation of growth	517/30771	666/40888	1.0315	0.0820354	1	517
GO:0051119	molecular_function	sugar transmembrane transporter activity	51/30771	61/40888	1.11095	0.0821496	1	51
GO:0060560	biological_process	developmental growth involved in morphogenesis	562/30771	725/40888	1.03004	0.0827964	1	562
GO:0009697	biological_process	salicylic acid biosynthetic process	14/30771	15/40888	1.2402	0.0834001	1	14
GO:0009920	biological_process	cell plate formation involved in plant-type cell wall biogenesis	14/30771	15/40888	1.2402	0.0834001	1	14
GO:0010385	molecular_function	double-stranded methylated DNA binding	14/30771	15/40888	1.2402	0.0834001	1	14
GO:0010821	biological_process	regulation of mitochondrion organization	14/30771	15/40888	1.2402	0.0834001	1	14
GO:0031298	cellular_component	replication fork protection complex	14/30771	15/40888	1.2402	0.0834001	1	14
GO:0009112	biological_process	nucleobase metabolic process	133/30771	166/40888	1.06463	0.0838119	1	133
GO:0044092	biological_process	negative regulation of molecular function	73/30771	89/40888	1.0899	0.0839929	1	73
GO:0009408	biological_process	response to heat	687/30771	889/40888	1.02686	0.0840224	1	687
GO:0005887	cellular_component	integral component of plasma membrane	157/30771	197/40888	1.05898	0.0841163	1	157
GO:0045488	biological_process	pectin metabolic process	126/30771	157/40888	1.06641	0.0843227	1	126
GO:0016289	molecular_function	CoA hydrolase activity	23/30771	26/40888	1.17546	0.0844963	1	23
GO:0016841	molecular_function	ammonia-lyase activity	23/30771	26/40888	1.17546	0.0844963	1	23
GO:1901656	biological_process	glycoside transport	23/30771	26/40888	1.17546	0.0844963	1	23
GO:0034248	biological_process	regulation of cellular amide metabolic process	451/30771	580/40888	1.03324	0.086126	1	451
GO:0001216	molecular_function	DNA-binding transcription activator activity	43/30771	51/40888	1.12035	0.0861363	1	43
GO:0010167	biological_process	response to nitrate	43/30771	51/40888	1.12035	0.0861363	1	43
GO:0044459	cellular_component	plasma membrane part	535/30771	690/40888	1.03029	0.0866965	1	535
GO:0006623	biological_process	protein targeting to vacuole	58/30771	70/40888	1.10099	0.0871096	1	58
GO:0007602	biological_process	phototransduction	87/30771	107/40888	1.08041	0.0872165	1	87
GO:0009585	biological_process	red, far-red light phototransduction	87/30771	107/40888	1.08041	0.0872165	1	87
GO:0071395	biological_process	cellular response to jasmonic acid stimulus	129/30771	161/40888	1.06468	0.0874499	1	129
GO:0000104	molecular_function	succinate dehydrogenase activity	39/30771	46/40888	1.12658	0.0876462	1	39
GO:0001228	molecular_function	DNA-binding transcription activator activity, RNA polymerase II-specific	39/30771	46/40888	1.12658	0.0876462	1	39
GO:0008061	molecular_function	chitin binding	39/30771	46/40888	1.12658	0.0876462	1	39
GO:0000919	biological_process	cell plate assembly	35/30771	41/40888	1.13433	0.0886073	1	35
GO:0007093	biological_process	mitotic cell cycle checkpoint	35/30771	41/40888	1.13433	0.0886073	1	35
GO:0048359	biological_process	mucilage metabolic process involved in seed coat development	35/30771	41/40888	1.13433	0.0886073	1	35
GO:0015295	molecular_function	solute:proton symporter activity	31/30771	36/40888	1.14423	0.0887404	1	31
GO:0042887	molecular_function	amide transmembrane transporter activity	76/30771	93/40888	1.08589	0.0894479	1	76
GO:0006417	biological_process	regulation of translation	450/30771	579/40888	1.03273	0.089856	1	450
GO:0030427	cellular_component	site of polarized growth	54/30771	65/40888	1.10391	0.090038	1	54
GO:0051920	molecular_function	peroxiredoxin activity	54/30771	65/40888	1.10391	0.090038	1	54
GO:0050657	biological_process	nucleic acid transport	273/30771	348/40888	1.04241	0.0914758	1	273
GO:0050658	biological_process	RNA transport	273/30771	348/40888	1.04241	0.0914758	1	273
GO:0051236	biological_process	establishment of RNA localization	273/30771	348/40888	1.04241	0.0914758	1	273
GO:0009832	biological_process	plant-type cell wall biogenesis	203/30771	257/40888	1.04958	0.0920788	1	203
GO:0032989	biological_process	cellular component morphogenesis	665/30771	861/40888	1.0263	0.0925474	1	665
GO:0003988	molecular_function	acetyl-CoA C-acyltransferase activity	50/30771	60/40888	1.10732	0.0929248	1	50
GO:0015985	biological_process	energy coupled proton transport, down electrochemical gradient	72/30771	88/40888	1.08719	0.0931217	1	72
GO:0015986	biological_process	ATP synthesis coupled proton transport	72/30771	88/40888	1.08719	0.0931217	1	72
GO:0009624	biological_process	response to nematode	128/30771	160/40888	1.06303	0.094504	1	128
GO:0006983	biological_process	ER overload response	18/30771	20/40888	1.19591	0.0954098	1	18
GO:0006984	biological_process	ER-nucleus signaling pathway	18/30771	20/40888	1.19591	0.0954098	1	18
GO:0009625	biological_process	response to insect	18/30771	20/40888	1.19591	0.0954098	1	18
GO:0009956	biological_process	radial pattern formation	18/30771	20/40888	1.19591	0.0954098	1	18
GO:0010268	biological_process	brassinosteroid homeostasis	18/30771	20/40888	1.19591	0.0954098	1	18
GO:0017022	molecular_function	myosin binding	18/30771	20/40888	1.19591	0.0954098	1	18
GO:0019104	molecular_function	DNA N-glycosylase activity	18/30771	20/40888	1.19591	0.0954098	1	18
GO:0031670	biological_process	cellular response to nutrient	18/30771	20/40888	1.19591	0.0954098	1	18
GO:0035335	biological_process	peptidyl-tyrosine dephosphorylation	18/30771	20/40888	1.19591	0.0954098	1	18
GO:0006188	biological_process	IMP biosynthetic process	46/30771	55/40888	1.11135	0.0957128	1	46
GO:0090329	biological_process	regulation of DNA-dependent DNA replication	46/30771	55/40888	1.11135	0.0957128	1	46
GO:0098687	cellular_component	chromosomal region	107/30771	133/40888	1.06902	0.0963154	1	107
GO:0008143	molecular_function	poly(A) binding	93/30771	115/40888	1.07458	0.0963401	1	93
GO:0070717	molecular_function	poly-purine tract binding	93/30771	115/40888	1.07458	0.0963401	1	93
GO:0044272	biological_process	sulfur compound biosynthetic process	380/30771	488/40888	1.03471	0.0970135	1	380
GO:0000122	biological_process	negative regulation of transcription by RNA polymerase II	57/30771	69/40888	1.09769	0.0976544	1	57
GO:0006638	biological_process	neutral lipid metabolic process	57/30771	69/40888	1.09769	0.0976544	1	57
GO:0006639	biological_process	acylglycerol metabolic process	57/30771	69/40888	1.09769	0.0976544	1	57
GO:0006812	biological_process	cation transport	657/30771	851/40888	1.02586	0.0977966	1	657
GO:0071669	biological_process	plant-type cell wall organization or biogenesis	298/30771	381/40888	1.03931	0.0982038	1	298
GO:0015276	molecular_function	ligand-gated ion channel activity	42/30771	50/40888	1.11618	0.0983191	1	42
GO:0022834	molecular_function	ligand-gated channel activity	42/30771	50/40888	1.11618	0.0983191	1	42
GO:0061077	biological_process	chaperone-mediated protein folding	288/30771	368/40888	1.03992	0.0988936	1	288
GO:0008236	molecular_function	serine-type peptidase activity	225/30771	286/40888	1.04537	0.0999183	1	225
GO:0016825	molecular_function	hydrolase activity, acting on acid phosphorus-nitrogen bonds	225/30771	286/40888	1.04537	0.0999183	1	225
GO:0017171	molecular_function	serine hydrolase activity	225/30771	286/40888	1.04537	0.0999183	1	225
GO:0050896	biological_process	response to stimulus	8801/30771	11627/40888	1.00582	0.100131	1	8801
GO:0003747	molecular_function	translation release factor activity	38/30771	45/40888	1.12208	0.100621	1	38
GO:0008079	molecular_function	translation termination factor activity	38/30771	45/40888	1.12208	0.100621	1	38
GO:0051345	biological_process	positive regulation of hydrolase activity	38/30771	45/40888	1.12208	0.100621	1	38
GO:0015035	molecular_function	protein disulfide oxidoreductase activity	96/30771	119/40888	1.07196	0.100769	1	96
GO:0016782	molecular_function	transferase activity, transferring sulfur-containing groups	64/30771	78/40888	1.09028	0.100899	1	64
GO:0070417	biological_process	cellular response to cold	64/30771	78/40888	1.09028	0.100899	1	64
GO:0002184	biological_process	cytoplasmic translational termination	22/30771	25/40888	1.16933	0.101073	1	22
GO:0004586	molecular_function	ornithine decarboxylase activity	22/30771	25/40888	1.16933	0.101073	1	22
GO:0005786	cellular_component	signal recognition particle, endoplasmic reticulum targeting	22/30771	25/40888	1.16933	0.101073	1	22
GO:0018444	cellular_component	translation release factor complex	22/30771	25/40888	1.16933	0.101073	1	22
GO:0030151	molecular_function	molybdenum ion binding	22/30771	25/40888	1.16933	0.101073	1	22
GO:0032388	biological_process	positive regulation of intracellular transport	22/30771	25/40888	1.16933	0.101073	1	22
GO:0033387	biological_process	putrescine biosynthetic process from ornithine	22/30771	25/40888	1.16933	0.101073	1	22
GO:0048500	cellular_component	signal recognition particle	22/30771	25/40888	1.16933	0.101073	1	22
GO:0070678	molecular_function	preprotein binding	22/30771	25/40888	1.16933	0.101073	1	22
GO:2001251	biological_process	negative regulation of chromosome organization	53/30771	64/40888	1.1004	0.101246	1	53
GO:0003916	molecular_function	DNA topoisomerase activity	34/30771	40/40888	1.12947	0.102436	1	34
GO:0000023	biological_process	maltose metabolic process	8/30771	8/40888	1.32878	0.102865	1	8
GO:0003992	molecular_function	N2-acetyl-L-ornithine:2-oxoglutarate 5-aminotransferase activity	8/30771	8/40888	1.32878	0.102865	1	8
GO:0004044	molecular_function	amidophosphoribosyltransferase activity	8/30771	8/40888	1.32878	0.102865	1	8
GO:0004303	molecular_function	estradiol 17-beta-dehydrogenase activity	8/30771	8/40888	1.32878	0.102865	1	8
GO:0004655	molecular_function	porphobilinogen synthase activity	8/30771	8/40888	1.32878	0.102865	1	8
GO:0005672	cellular_component	transcription factor TFIIA complex	8/30771	8/40888	1.32878	0.102865	1	8
GO:0005968	cellular_component	Rab-protein geranylgeranyltransferase complex	8/30771	8/40888	1.32878	0.102865	1	8
GO:0008179	molecular_function	adenylate cyclase binding	8/30771	8/40888	1.32878	0.102865	1	8
GO:0009609	biological_process	response to symbiotic bacterium	8/30771	8/40888	1.32878	0.102865	1	8
GO:0009819	biological_process	drought recovery	8/30771	8/40888	1.32878	0.102865	1	8
GO:0010541	biological_process	acropetal auxin transport	8/30771	8/40888	1.32878	0.102865	1	8
GO:0015146	molecular_function	pentose transmembrane transporter activity	8/30771	8/40888	1.32878	0.102865	1	8
GO:0016882	molecular_function	cyclo-ligase activity	8/30771	8/40888	1.32878	0.102865	1	8
GO:0019632	biological_process	shikimate metabolic process	8/30771	8/40888	1.32878	0.102865	1	8
GO:0030915	cellular_component	Smc5-Smc6 complex	8/30771	8/40888	1.32878	0.102865	1	8
GO:0043076	cellular_component	megasporocyte nucleus	8/30771	8/40888	1.32878	0.102865	1	8
GO:0043078	cellular_component	polar nucleus	8/30771	8/40888	1.32878	0.102865	1	8
GO:0044000	biological_process	movement in host	8/30771	8/40888	1.32878	0.102865	1	8
GO:0045761	biological_process	regulation of adenylate cyclase activity	8/30771	8/40888	1.32878	0.102865	1	8
GO:0046739	biological_process	transport of virus in multicellular host	8/30771	8/40888	1.32878	0.102865	1	8
GO:0051339	biological_process	regulation of lyase activity	8/30771	8/40888	1.32878	0.102865	1	8
GO:0051814	biological_process	movement in other organism involved in symbiotic interaction	8/30771	8/40888	1.32878	0.102865	1	8
GO:0052126	biological_process	movement in host environment	8/30771	8/40888	1.32878	0.102865	1	8
GO:0052192	biological_process	movement in environment of other organism involved in symbiotic interaction	8/30771	8/40888	1.32878	0.102865	1	8
GO:0071291	biological_process	cellular response to selenium ion	8/30771	8/40888	1.32878	0.102865	1	8
GO:0080163	biological_process	regulation of protein serine/threonine phosphatase activity	8/30771	8/40888	1.32878	0.102865	1	8
GO:0090355	biological_process	positive regulation of auxin metabolic process	8/30771	8/40888	1.32878	0.102865	1	8
GO:0090506	biological_process	axillary shoot meristem initiation	8/30771	8/40888	1.32878	0.102865	1	8
GO:0106068	cellular_component	SUMO ligase complex	8/30771	8/40888	1.32878	0.102865	1	8
GO:1900109	biological_process	regulation of histone H3-K9 dimethylation	8/30771	8/40888	1.32878	0.102865	1	8
GO:1900111	biological_process	positive regulation of histone H3-K9 dimethylation	8/30771	8/40888	1.32878	0.102865	1	8
GO:1900378	biological_process	positive regulation of secondary metabolite biosynthetic process	8/30771	8/40888	1.32878	0.102865	1	8
GO:0015491	molecular_function	cation:cation antiporter activity	71/30771	87/40888	1.08441	0.103048	1	71
GO:0005942	cellular_component	phosphatidylinositol 3-kinase complex	26/30771	30/40888	1.15161	0.103284	1	26
GO:0035032	cellular_component	phosphatidylinositol 3-kinase complex, class III	26/30771	30/40888	1.15161	0.103284	1	26
GO:0070676	biological_process	intralumenal vesicle formation	26/30771	30/40888	1.15161	0.103284	1	26
GO:0004512	molecular_function	inositol-3-phosphate synthase activity	30/30771	35/40888	1.13896	0.103477	1	30
GO:0007007	biological_process	inner mitochondrial membrane organization	30/30771	35/40888	1.13896	0.103477	1	30
GO:0044390	molecular_function	ubiquitin-like protein conjugating enzyme binding	30/30771	35/40888	1.13896	0.103477	1	30
GO:0071577	biological_process	zinc ion transmembrane transport	30/30771	35/40888	1.13896	0.103477	1	30
GO:0071840	biological_process	cellular component organization or biogenesis	5599/30771	7383/40888	1.0077	0.103663	1	5599
GO:0050821	biological_process	protein stabilization	113/30771	141/40888	1.06491	0.103936	1	113
GO:0016417	molecular_function	S-acyltransferase activity	78/30771	96/40888	1.07964	0.104373	1	78
GO:0000188	biological_process	inactivation of MAPK activity	13/30771	14/40888	1.23387	0.104687	1	13
GO:0003935	molecular_function	GTP cyclohydrolase II activity	13/30771	14/40888	1.23387	0.104687	1	13
GO:0008330	molecular_function	protein tyrosine/threonine phosphatase activity	13/30771	14/40888	1.23387	0.104687	1	13
GO:0016559	biological_process	peroxisome fission	13/30771	14/40888	1.23387	0.104687	1	13
GO:0018126	biological_process	protein hydroxylation	13/30771	14/40888	1.23387	0.104687	1	13
GO:0018738	molecular_function	S-formylglutathione hydrolase activity	13/30771	14/40888	1.23387	0.104687	1	13
GO:0019511	biological_process	peptidyl-proline hydroxylation	13/30771	14/40888	1.23387	0.104687	1	13
GO:0031012	cellular_component	extracellular matrix	13/30771	14/40888	1.23387	0.104687	1	13
GO:0032351	biological_process	negative regulation of hormone metabolic process	13/30771	14/40888	1.23387	0.104687	1	13
GO:0033597	cellular_component	mitotic checkpoint complex	13/30771	14/40888	1.23387	0.104687	1	13
GO:0045815	biological_process	positive regulation of gene expression, epigenetic	13/30771	14/40888	1.23387	0.104687	1	13
GO:1901474	molecular_function	azole transmembrane transporter activity	13/30771	14/40888	1.23387	0.104687	1	13
GO:0005886	cellular_component	plasma membrane	5629/30771	7423/40888	1.00764	0.104699	1	5629
GO:0006574	biological_process	valine catabolic process	49/30771	59/40888	1.10357	0.104858	1	49
GO:0036452	cellular_component	ESCRT complex	49/30771	59/40888	1.10357	0.104858	1	49
GO:0046113	biological_process	nucleobase catabolic process	49/30771	59/40888	1.10357	0.104858	1	49
GO:0045324	biological_process	late endosome to vacuole transport	85/30771	105/40888	1.07568	0.105069	1	85
GO:0019829	molecular_function	ATPase-coupled cation transmembrane transporter activity	472/30771	609/40888	1.02986	0.10525	1	472
GO:0042175	cellular_component	nuclear outer membrane-endoplasmic reticulum membrane network	1231/30771	1607/40888	1.01788	0.10593	1	1231
GO:0008134	molecular_function	transcription factor binding	123/30771	154/40888	1.0613	0.106534	1	123
GO:0009867	biological_process	jasmonic acid mediated signaling pathway	123/30771	154/40888	1.0613	0.106534	1	123
GO:0033692	biological_process	cellular polysaccharide biosynthetic process	270/30771	345/40888	1.03992	0.107132	1	270
GO:0006591	biological_process	ornithine metabolic process	45/30771	54/40888	1.10732	0.10844	1	45
GO:1900425	biological_process	negative regulation of defense response to bacterium	45/30771	54/40888	1.10732	0.10844	1	45
GO:0005789	cellular_component	endoplasmic reticulum membrane	1230/30771	1606/40888	1.01769	0.108588	1	1230
GO:1901605	biological_process	alpha-amino acid metabolic process	908/30771	1182/40888	1.02076	0.109029	1	908
GO:0007030	biological_process	Golgi organization	56/30771	68/40888	1.09429	0.109231	1	56
GO:0009636	biological_process	response to toxic substance	400/30771	515/40888	1.03206	0.109288	1	400
GO:0031072	molecular_function	heat shock protein binding	322/30771	413/40888	1.036	0.109291	1	322
GO:0000184	biological_process	nuclear-transcribed mRNA catabolic process, nonsense-mediated decay	126/30771	158/40888	1.05966	0.109967	1	126
GO:0000779	cellular_component	condensed chromosome, centromeric region	41/30771	49/40888	1.11184	0.111919	1	41
GO:0015291	molecular_function	secondary active transmembrane transporter activity	573/30771	742/40888	1.02614	0.112456	1	573
GO:0009808	biological_process	lignin metabolic process	112/30771	140/40888	1.06303	0.112497	1	112
GO:0010639	biological_process	negative regulation of organelle organization	112/30771	140/40888	1.06303	0.112497	1	112
GO:0000030	molecular_function	mannosyltransferase activity	52/30771	63/40888	1.09677	0.113582	1	52
GO:0009251	biological_process	glucan catabolic process	70/30771	86/40888	1.08157	0.113814	1	70
GO:0044247	biological_process	cellular polysaccharide catabolic process	70/30771	86/40888	1.08157	0.113814	1	70
GO:0031226	cellular_component	intrinsic component of plasma membrane	272/30771	348/40888	1.03859	0.114404	1	272
GO:0034401	biological_process	chromatin organization involved in regulation of transcription	91/30771	113/40888	1.07008	0.114866	1	91
GO:0051129	biological_process	negative regulation of cellular component organization	122/30771	153/40888	1.05955	0.114883	1	122
GO:0004069	molecular_function	L-aspartate:2-oxoglutarate aminotransferase activity	37/30771	44/40888	1.11739	0.115182	1	37
GO:0007006	biological_process	mitochondrial membrane organization	37/30771	44/40888	1.11739	0.115182	1	37
GO:0031306	cellular_component	intrinsic component of mitochondrial outer membrane	37/30771	44/40888	1.11739	0.115182	1	37
GO:0031307	cellular_component	integral component of mitochondrial outer membrane	37/30771	44/40888	1.11739	0.115182	1	37
GO:0045281	cellular_component	succinate dehydrogenase complex	37/30771	44/40888	1.11739	0.115182	1	37
GO:0070507	biological_process	regulation of microtubule cytoskeleton organization	37/30771	44/40888	1.11739	0.115182	1	37
GO:0007231	biological_process	osmosensory signaling pathway	17/30771	19/40888	1.18891	0.116045	1	17
GO:0009368	cellular_component	endopeptidase Clp complex	17/30771	19/40888	1.18891	0.116045	1	17
GO:0015154	molecular_function	disaccharide transmembrane transporter activity	17/30771	19/40888	1.18891	0.116045	1	17
GO:0015157	molecular_function	oligosaccharide transmembrane transporter activity	17/30771	19/40888	1.18891	0.116045	1	17
GO:0016673	molecular_function	oxidoreductase activity, acting on a sulfur group of donors, iron-sulfur protein as acceptor	17/30771	19/40888	1.18891	0.116045	1	17
GO:0031371	cellular_component	ubiquitin conjugating enzyme complex	17/30771	19/40888	1.18891	0.116045	1	17
GO:0031372	cellular_component	UBC13-MMS2 complex	17/30771	19/40888	1.18891	0.116045	1	17
GO:0031519	cellular_component	PcG protein complex	17/30771	19/40888	1.18891	0.116045	1	17
GO:0031540	biological_process	regulation of anthocyanin biosynthetic process	17/30771	19/40888	1.18891	0.116045	1	17
GO:0048256	molecular_function	flap endonuclease activity	17/30771	19/40888	1.18891	0.116045	1	17
GO:0030176	cellular_component	integral component of endoplasmic reticulum membrane	132/30771	166/40888	1.05662	0.116667	1	132
GO:0031227	cellular_component	intrinsic component of endoplasmic reticulum membrane	132/30771	166/40888	1.05662	0.116667	1	132
GO:0016893	molecular_function	endonuclease activity, active with either ribo- or deoxyribonucleic acids and producing 5'-phosphomonoesters	59/30771	72/40888	1.08886	0.116887	1	59
GO:0009415	biological_process	response to water	527/30771	682/40888	1.02679	0.117268	1	527
GO:0032592	cellular_component	integral component of mitochondrial membrane	108/30771	135/40888	1.06303	0.117605	1	108
GO:0042393	molecular_function	histone binding	142/30771	179/40888	1.05412	0.117962	1	142
GO:0018022	biological_process	peptidyl-lysine methylation	48/30771	58/40888	1.09968	0.118028	1	48
GO:0051131	biological_process	chaperone-mediated protein complex assembly	48/30771	58/40888	1.09968	0.118028	1	48
GO:0098739	biological_process	import across plasma membrane	48/30771	58/40888	1.09968	0.118028	1	48
GO:0009934	biological_process	regulation of meristem structural organization	33/30771	39/40888	1.12436	0.118057	1	33
GO:0031490	molecular_function	chromatin DNA binding	33/30771	39/40888	1.12436	0.118057	1	33
GO:0051087	molecular_function	chaperone binding	33/30771	39/40888	1.12436	0.118057	1	33
GO:0070181	molecular_function	small ribosomal subunit rRNA binding	33/30771	39/40888	1.12436	0.118057	1	33
GO:0016747	molecular_function	transferase activity, transferring acyl groups other than amino-acyl groups	530/30771	686/40888	1.02661	0.118138	1	530
GO:0048229	biological_process	gametophyte development	715/30771	929/40888	1.02269	0.118152	1	715
GO:0065009	biological_process	regulation of molecular function	330/30771	424/40888	1.03419	0.118646	1	330
GO:0050790	biological_process	regulation of catalytic activity	281/30771	360/40888	1.03719	0.119204	1	281
GO:0031967	cellular_component	organelle envelope	1905/30771	2498/40888	1.01334	0.119431	1	1905
GO:0031975	cellular_component	envelope	1905/30771	2498/40888	1.01334	0.119431	1	1905
GO:0045814	biological_process	negative regulation of gene expression, epigenetic	94/30771	117/40888	1.06757	0.119585	1	94
GO:0009653	biological_process	anatomical structure morphogenesis	1339/30771	1751/40888	1.01613	0.119698	1	1339
GO:0042742	biological_process	defense response to bacterium	635/30771	824/40888	1.024	0.119847	1	635
GO:0050801	biological_process	ion homeostasis	552/30771	715/40888	1.02586	0.11986	1	552
GO:0000054	biological_process	ribosomal subunit export from nucleus	73/30771	90/40888	1.07779	0.119954	1	73
GO:0033750	biological_process	ribosome localization	73/30771	90/40888	1.07779	0.119954	1	73
GO:0071428	biological_process	rRNA-containing ribonucleoprotein complex export from nucleus	73/30771	90/40888	1.07779	0.119954	1	73
GO:0005385	molecular_function	zinc ion transmembrane transporter activity	29/30771	34/40888	1.13337	0.120263	1	29
GO:0015095	molecular_function	magnesium ion transmembrane transporter activity	29/30771	34/40888	1.13337	0.120263	1	29
GO:0031537	biological_process	regulation of anthocyanin metabolic process	29/30771	34/40888	1.13337	0.120263	1	29
GO:2001070	molecular_function	starch binding	29/30771	34/40888	1.13337	0.120263	1	29
GO:0008312	molecular_function	7S RNA binding	21/30771	24/40888	1.16269	0.120457	1	21
GO:0010359	biological_process	regulation of anion channel activity	21/30771	24/40888	1.16269	0.120457	1	21
GO:0047066	molecular_function	phospholipid-hydroperoxide glutathione peroxidase activity	21/30771	24/40888	1.16269	0.120457	1	21
GO:0051222	biological_process	positive regulation of protein transport	21/30771	24/40888	1.16269	0.120457	1	21
GO:0071277	biological_process	cellular response to calcium ion	21/30771	24/40888	1.16269	0.120457	1	21
GO:0090316	biological_process	positive regulation of intracellular protein transport	21/30771	24/40888	1.16269	0.120457	1	21
GO:1904951	biological_process	positive regulation of establishment of protein localization	21/30771	24/40888	1.16269	0.120457	1	21
GO:0016579	biological_process	protein deubiquitination	145/30771	183/40888	1.05286	0.121011	1	145
GO:0001653	molecular_function	peptide receptor activity	25/30771	29/40888	1.1455	0.121338	1	25
GO:0008215	biological_process	spermine metabolic process	25/30771	29/40888	1.1455	0.121338	1	25
GO:0010039	biological_process	response to iron ion	25/30771	29/40888	1.1455	0.121338	1	25
GO:0071541	cellular_component	eukaryotic translation initiation factor 3 complex, eIF3m	25/30771	29/40888	1.1455	0.121338	1	25
GO:1903959	biological_process	regulation of anion transmembrane transport	25/30771	29/40888	1.1455	0.121338	1	25
GO:0006641	biological_process	triglyceride metabolic process	55/30771	67/40888	1.09079	0.1219	1	55
GO:0005634	cellular_component	nucleus	9125/30771	12063/40888	1.00515	0.122392	1	9125
GO:0006086	biological_process	acetyl-CoA biosynthetic process from pyruvate	44/30771	53/40888	1.10314	0.122534	1	44
GO:0032386	biological_process	regulation of intracellular transport	44/30771	53/40888	1.10314	0.122534	1	44
GO:0051223	biological_process	regulation of protein transport	44/30771	53/40888	1.10314	0.122534	1	44
GO:0070201	biological_process	regulation of establishment of protein localization	44/30771	53/40888	1.10314	0.122534	1	44
GO:0090087	biological_process	regulation of peptide transport	44/30771	53/40888	1.10314	0.122534	1	44
GO:0006073	biological_process	cellular glucan metabolic process	339/30771	436/40888	1.03316	0.122682	1	339
GO:0044042	biological_process	glucan metabolic process	339/30771	436/40888	1.03316	0.122682	1	339
GO:0009698	biological_process	phenylpropanoid metabolic process	218/30771	278/40888	1.042	0.123029	1	218
GO:0009719	biological_process	response to endogenous stimulus	2137/30771	2805/40888	1.01234	0.123144	1	2137
GO:0009414	biological_process	response to water deprivation	516/30771	668/40888	1.02643	0.123341	1	516
GO:0009736	biological_process	cytokinin-activated signaling pathway	158/30771	200/40888	1.04974	0.12453	1	158
GO:0046873	molecular_function	metal ion transmembrane transporter activity	474/30771	613/40888	1.02748	0.124878	1	474
GO:0016684	molecular_function	oxidoreductase activity, acting on peroxide as acceptor	221/30771	282/40888	1.04135	0.125056	1	221
GO:0006342	biological_process	chromatin silencing	90/30771	112/40888	1.06777	0.125127	1	90
GO:0009583	biological_process	detection of light stimulus	90/30771	112/40888	1.06777	0.125127	1	90
GO:0097549	biological_process	chromatin organization involved in negative regulation of transcription	90/30771	112/40888	1.06777	0.125127	1	90
GO:0048366	biological_process	leaf development	445/30771	575/40888	1.02836	0.12536	1	445
GO:0006525	biological_process	arginine metabolic process	83/30771	103/40888	1.07077	0.125731	1	83
GO:0051606	biological_process	detection of stimulus	141/30771	178/40888	1.05258	0.126314	1	141
GO:0034620	biological_process	cellular response to unfolded protein	270/30771	346/40888	1.03691	0.126428	1	270
GO:0006613	biological_process	cotranslational protein targeting to membrane	40/30771	48/40888	1.10732	0.127041	1	40
GO:0006614	biological_process	SRP-dependent cotranslational protein targeting to membrane	40/30771	48/40888	1.10732	0.127041	1	40
GO:0033157	biological_process	regulation of intracellular protein transport	40/30771	48/40888	1.10732	0.127041	1	40
GO:0006022	biological_process	aminoglycan metabolic process	51/30771	62/40888	1.09303	0.127112	1	51
GO:0009527	cellular_component	plastid outer membrane	51/30771	62/40888	1.09303	0.127112	1	51
GO:0009707	cellular_component	chloroplast outer membrane	51/30771	62/40888	1.09303	0.127112	1	51
GO:0098588	cellular_component	bounding membrane of organelle	2960/30771	3894/40888	1.01007	0.128606	1	2960
GO:0042625	molecular_function	ATPase-coupled ion transmembrane transporter activity	486/30771	629/40888	1.02669	0.128761	1	486
GO:0031985	cellular_component	Golgi cisterna	250/30771	320/40888	1.03811	0.128821	1	250
GO:0101005	molecular_function	ubiquitinyl hydrolase activity	144/30771	182/40888	1.05135	0.129425	1	144
GO:0004601	molecular_function	peroxidase activity	217/30771	277/40888	1.04096	0.129965	1	217
GO:0006333	biological_process	chromatin assembly or disassembly	93/30771	116/40888	1.06532	0.12997	1	93
GO:0072594	biological_process	establishment of protein localization to organelle	344/30771	443/40888	1.03183	0.130922	1	344
GO:0016049	biological_process	cell growth	645/30771	838/40888	1.02275	0.130951	1	645
GO:0005365	molecular_function	myo-inositol transmembrane transporter activity	12/30771	13/40888	1.22657	0.130953	1	12
GO:0005464	molecular_function	UDP-xylose transmembrane transporter activity	12/30771	13/40888	1.22657	0.130953	1	12
GO:0006598	biological_process	polyamine catabolic process	12/30771	13/40888	1.22657	0.130953	1	12
GO:0009924	molecular_function	octadecanal decarbonylase activity	12/30771	13/40888	1.22657	0.130953	1	12
GO:0015166	molecular_function	polyol transmembrane transporter activity	12/30771	13/40888	1.22657	0.130953	1	12
GO:0016647	molecular_function	oxidoreductase activity, acting on the CH-NH group of donors, oxygen as acceptor	12/30771	13/40888	1.22657	0.130953	1	12
GO:0016985	molecular_function	mannan endo-1,4-beta-mannosidase activity	12/30771	13/40888	1.22657	0.130953	1	12
GO:0032353	biological_process	negative regulation of hormone biosynthetic process	12/30771	13/40888	1.22657	0.130953	1	12
GO:0033198	biological_process	response to ATP	12/30771	13/40888	1.22657	0.130953	1	12
GO:0044154	biological_process	histone H3-K14 acetylation	12/30771	13/40888	1.22657	0.130953	1	12
GO:0046208	biological_process	spermine catabolic process	12/30771	13/40888	1.22657	0.130953	1	12
GO:0046592	molecular_function	polyamine oxidase activity	12/30771	13/40888	1.22657	0.130953	1	12
GO:0051512	biological_process	positive regulation of unidimensional cell growth	12/30771	13/40888	1.22657	0.130953	1	12
GO:0051567	biological_process	histone H3-K9 methylation	12/30771	13/40888	1.22657	0.130953	1	12
GO:0051765	molecular_function	inositol tetrakisphosphate kinase activity	12/30771	13/40888	1.22657	0.130953	1	12
GO:0071249	biological_process	cellular response to nitrate	12/30771	13/40888	1.22657	0.130953	1	12
GO:0071318	biological_process	cellular response to ATP	12/30771	13/40888	1.22657	0.130953	1	12
GO:0071771	molecular_function	aldehyde decarbonylase activity	12/30771	13/40888	1.22657	0.130953	1	12
GO:0080183	biological_process	response to photooxidative stress	12/30771	13/40888	1.22657	0.130953	1	12
GO:0106167	biological_process	extracellular ATP signaling	12/30771	13/40888	1.22657	0.130953	1	12
GO:1902533	biological_process	positive regulation of intracellular signal transduction	12/30771	13/40888	1.22657	0.130953	1	12
GO:1990465	molecular_function	aldehyde oxygenase (deformylating) activity	12/30771	13/40888	1.22657	0.130953	1	12
GO:0031965	cellular_component	nuclear membrane	86/30771	107/40888	1.06799	0.130986	1	86
GO:0072509	molecular_function	divalent inorganic cation transmembrane transporter activity	86/30771	107/40888	1.06799	0.130986	1	86
GO:0048443	biological_process	stamen development	110/30771	138/40888	1.05918	0.13126	1	110
GO:0048466	biological_process	androecium development	110/30771	138/40888	1.05918	0.13126	1	110
GO:0007062	biological_process	sister chromatid cohesion	36/30771	43/40888	1.11247	0.131454	1	36
GO:0019209	molecular_function	kinase activator activity	36/30771	43/40888	1.11247	0.131454	1	36
GO:0030295	molecular_function	protein kinase activator activity	36/30771	43/40888	1.11247	0.131454	1	36
GO:0044030	biological_process	regulation of DNA methylation	36/30771	43/40888	1.11247	0.131454	1	36
GO:1901071	biological_process	glucosamine-containing compound metabolic process	36/30771	43/40888	1.11247	0.131454	1	36
GO:1901681	molecular_function	sulfur compound binding	79/30771	98/40888	1.07116	0.131632	1	79
GO:0006754	biological_process	ATP biosynthetic process	72/30771	89/40888	1.07497	0.131785	1	72
GO:0001676	biological_process	long-chain fatty acid metabolic process	47/30771	57/40888	1.09566	0.132513	1	47
GO:0010089	biological_process	xylem development	47/30771	57/40888	1.09566	0.132513	1	47
GO:0034968	biological_process	histone lysine methylation	47/30771	57/40888	1.09566	0.132513	1	47
GO:0080022	biological_process	primary root development	47/30771	57/40888	1.09566	0.132513	1	47
GO:0009725	biological_process	response to hormone	2067/30771	2714/40888	1.01201	0.13413	1	2067
GO:0006913	biological_process	nucleocytoplasmic transport	249/30771	319/40888	1.0372	0.135508	1	249
GO:0051169	biological_process	nuclear transport	249/30771	319/40888	1.0372	0.135508	1	249
GO:0000373	biological_process	Group II intron splicing	32/30771	38/40888	1.11898	0.135621	1	32
GO:0035459	biological_process	vesicle cargo loading	32/30771	38/40888	1.11898	0.135621	1	32
GO:0050826	biological_process	response to freezing	32/30771	38/40888	1.11898	0.135621	1	32
GO:0051592	biological_process	response to calcium ion	32/30771	38/40888	1.11898	0.135621	1	32
GO:1900864	biological_process	mitochondrial RNA modification	32/30771	38/40888	1.11898	0.135621	1	32
GO:2000762	biological_process	regulation of phenylpropanoid metabolic process	32/30771	38/40888	1.11898	0.135621	1	32
GO:0055046	biological_process	microgametogenesis	54/30771	66/40888	1.08719	0.135722	1	54
GO:0080050	biological_process	regulation of seed development	54/30771	66/40888	1.08719	0.135722	1	54
GO:0000256	biological_process	allantoin catabolic process	7/30771	7/40888	1.32878	0.136693	1	7
GO:0000309	molecular_function	nicotinamide-nucleotide adenylyltransferase activity	7/30771	7/40888	1.32878	0.136693	1	7
GO:0004152	molecular_function	dihydroorotate dehydrogenase activity	7/30771	7/40888	1.32878	0.136693	1	7
GO:0004198	molecular_function	calcium-dependent cysteine-type endopeptidase activity	7/30771	7/40888	1.32878	0.136693	1	7
GO:0004515	molecular_function	nicotinate-nucleotide adenylyltransferase activity	7/30771	7/40888	1.32878	0.136693	1	7
GO:0004715	molecular_function	non-membrane spanning protein tyrosine kinase activity	7/30771	7/40888	1.32878	0.136693	1	7
GO:0005242	molecular_function	inward rectifier potassium channel activity	7/30771	7/40888	1.32878	0.136693	1	7
GO:0006516	biological_process	glycoprotein catabolic process	7/30771	7/40888	1.32878	0.136693	1	7
GO:0006569	biological_process	tryptophan catabolic process	7/30771	7/40888	1.32878	0.136693	1	7
GO:0006651	biological_process	diacylglycerol biosynthetic process	7/30771	7/40888	1.32878	0.136693	1	7
GO:0006884	biological_process	cell volume homeostasis	7/30771	7/40888	1.32878	0.136693	1	7
GO:0008417	molecular_function	fucosyltransferase activity	7/30771	7/40888	1.32878	0.136693	1	7
GO:0009233	biological_process	menaquinone metabolic process	7/30771	7/40888	1.32878	0.136693	1	7
GO:0009234	biological_process	menaquinone biosynthetic process	7/30771	7/40888	1.32878	0.136693	1	7
GO:0009317	cellular_component	acetyl-CoA carboxylase complex	7/30771	7/40888	1.32878	0.136693	1	7
GO:0009903	biological_process	chloroplast avoidance movement	7/30771	7/40888	1.32878	0.136693	1	7
GO:0009963	biological_process	positive regulation of flavonoid biosynthetic process	7/30771	7/40888	1.32878	0.136693	1	7
GO:0010031	biological_process	circumnutation	7/30771	7/40888	1.32878	0.136693	1	7
GO:0010360	biological_process	negative regulation of anion channel activity	7/30771	7/40888	1.32878	0.136693	1	7
GO:0010466	biological_process	negative regulation of peptidase activity	7/30771	7/40888	1.32878	0.136693	1	7
GO:0010601	biological_process	positive regulation of auxin biosynthetic process	7/30771	7/40888	1.32878	0.136693	1	7
GO:0016889	molecular_function	endodeoxyribonuclease activity, producing 3'-phosphomonoesters	7/30771	7/40888	1.32878	0.136693	1	7
GO:0018685	molecular_function	alkane 1-monooxygenase activity	7/30771	7/40888	1.32878	0.136693	1	7
GO:0032104	biological_process	regulation of response to extracellular stimulus	7/30771	7/40888	1.32878	0.136693	1	7
GO:0032107	biological_process	regulation of response to nutrient levels	7/30771	7/40888	1.32878	0.136693	1	7
GO:0032410	biological_process	negative regulation of transporter activity	7/30771	7/40888	1.32878	0.136693	1	7
GO:0032413	biological_process	negative regulation of ion transmembrane transporter activity	7/30771	7/40888	1.32878	0.136693	1	7
GO:0034763	biological_process	negative regulation of transmembrane transport	7/30771	7/40888	1.32878	0.136693	1	7
GO:0034766	biological_process	negative regulation of ion transmembrane transport	7/30771	7/40888	1.32878	0.136693	1	7
GO:0043073	cellular_component	germ cell nucleus	7/30771	7/40888	1.32878	0.136693	1	7
GO:0043985	biological_process	histone H4-R3 methylation	7/30771	7/40888	1.32878	0.136693	1	7
GO:0044232	cellular_component	organelle membrane contact site	7/30771	7/40888	1.32878	0.136693	1	7
GO:0045485	molecular_function	omega-6 fatty acid desaturase activity	7/30771	7/40888	1.32878	0.136693	1	7
GO:0045806	biological_process	negative regulation of endocytosis	7/30771	7/40888	1.32878	0.136693	1	7
GO:0045835	biological_process	negative regulation of meiotic nuclear division	7/30771	7/40888	1.32878	0.136693	1	7
GO:0046218	biological_process	indolalkylamine catabolic process	7/30771	7/40888	1.32878	0.136693	1	7
GO:0046339	biological_process	diacylglycerol metabolic process	7/30771	7/40888	1.32878	0.136693	1	7
GO:0046554	molecular_function	malate dehydrogenase (NADP+) activity	7/30771	7/40888	1.32878	0.136693	1	7
GO:0048261	biological_process	negative regulation of receptor-mediated endocytosis	7/30771	7/40888	1.32878	0.136693	1	7
GO:0050184	molecular_function	phosphatidylcholine desaturase activity	7/30771	7/40888	1.32878	0.136693	1	7
GO:0050879	biological_process	multicellular organismal movement	7/30771	7/40888	1.32878	0.136693	1	7
GO:0051095	biological_process	regulation of helicase activity	7/30771	7/40888	1.32878	0.136693	1	7
GO:0051447	biological_process	negative regulation of meiotic cell cycle	7/30771	7/40888	1.32878	0.136693	1	7
GO:0052547	biological_process	regulation of peptidase activity	7/30771	7/40888	1.32878	0.136693	1	7
GO:0060771	biological_process	phyllotactic patterning	7/30771	7/40888	1.32878	0.136693	1	7
GO:0060772	biological_process	leaf phyllotactic patterning	7/30771	7/40888	1.32878	0.136693	1	7
GO:0060858	biological_process	vesicle-mediated transport involved in floral organ abscission	7/30771	7/40888	1.32878	0.136693	1	7
GO:0070505	cellular_component	pollen coat	7/30771	7/40888	1.32878	0.136693	1	7
GO:0071260	biological_process	cellular response to mechanical stimulus	7/30771	7/40888	1.32878	0.136693	1	7
GO:0071561	cellular_component	nucleus-vacuole junction	7/30771	7/40888	1.32878	0.136693	1	7
GO:0090306	biological_process	spindle assembly involved in meiosis	7/30771	7/40888	1.32878	0.136693	1	7
GO:0090628	biological_process	plant epidermal cell fate specification	7/30771	7/40888	1.32878	0.136693	1	7
GO:0102871	molecular_function	1-16:0-2-18:1-phosphatidylcholine desaturase activity	7/30771	7/40888	1.32878	0.136693	1	7
GO:1900186	biological_process	negative regulation of clathrin-dependent endocytosis	7/30771	7/40888	1.32878	0.136693	1	7
GO:1903792	biological_process	negative regulation of anion transport	7/30771	7/40888	1.32878	0.136693	1	7
GO:1903960	biological_process	negative regulation of anion transmembrane transport	7/30771	7/40888	1.32878	0.136693	1	7
GO:1904961	biological_process	quiescent center organization	7/30771	7/40888	1.32878	0.136693	1	7
GO:1901136	biological_process	carbohydrate derivative catabolic process	82/30771	102/40888	1.06824	0.137186	1	82
GO:0032535	biological_process	regulation of cellular component size	183/30771	233/40888	1.04364	0.1375	1	183
GO:0090066	biological_process	regulation of anatomical structure size	183/30771	233/40888	1.04364	0.1375	1	183
GO:0048827	biological_process	phyllome development	618/30771	803/40888	1.02265	0.137724	1	618
GO:0005615	cellular_component	extracellular space	206/30771	263/40888	1.0408	0.138213	1	206
GO:0000902	biological_process	cell morphogenesis	624/30771	811/40888	1.02239	0.139288	1	624
GO:0009445	biological_process	putrescine metabolic process	28/30771	33/40888	1.12745	0.13929	1	28
GO:0009446	biological_process	putrescine biosynthetic process	28/30771	33/40888	1.12745	0.13929	1	28
GO:0015693	biological_process	magnesium ion transport	28/30771	33/40888	1.12745	0.13929	1	28
GO:0051865	biological_process	protein autoubiquitination	28/30771	33/40888	1.12745	0.13929	1	28
GO:0000036	molecular_function	acyl carrier activity	16/30771	18/40888	1.18114	0.14058	1	16
GO:0000792	cellular_component	heterochromatin	16/30771	18/40888	1.18114	0.14058	1	16
GO:0003860	molecular_function	3-hydroxyisobutyryl-CoA hydrolase activity	16/30771	18/40888	1.18114	0.14058	1	16
GO:0006116	biological_process	NADH oxidation	16/30771	18/40888	1.18114	0.14058	1	16
GO:0006517	biological_process	protein deglycosylation	16/30771	18/40888	1.18114	0.14058	1	16
GO:0008515	molecular_function	sucrose transmembrane transporter activity	16/30771	18/40888	1.18114	0.14058	1	16
GO:0009268	biological_process	response to pH	16/30771	18/40888	1.18114	0.14058	1	16
GO:0016593	cellular_component	Cdc73/Paf1 complex	16/30771	18/40888	1.18114	0.14058	1	16
GO:0019418	biological_process	sulfide oxidation	16/30771	18/40888	1.18114	0.14058	1	16
GO:0019424	biological_process	sulfide oxidation, using siroheme sulfite reductase	16/30771	18/40888	1.18114	0.14058	1	16
GO:0032029	molecular_function	myosin tail binding	16/30771	18/40888	1.18114	0.14058	1	16
GO:0032036	molecular_function	myosin heavy chain binding	16/30771	18/40888	1.18114	0.14058	1	16
GO:0040020	biological_process	regulation of meiotic nuclear division	16/30771	18/40888	1.18114	0.14058	1	16
GO:0042351	biological_process	'de novo' GDP-L-fucose biosynthetic process	16/30771	18/40888	1.18114	0.14058	1	16
GO:0044620	molecular_function	ACP phosphopantetheine attachment site binding	16/30771	18/40888	1.18114	0.14058	1	16
GO:0048587	biological_process	regulation of short-day photoperiodism, flowering	16/30771	18/40888	1.18114	0.14058	1	16
GO:0050311	molecular_function	sulfite reductase (ferredoxin) activity	16/30771	18/40888	1.18114	0.14058	1	16
GO:0051192	molecular_function	prosthetic group binding	16/30771	18/40888	1.18114	0.14058	1	16
GO:0080115	molecular_function	myosin XI tail binding	16/30771	18/40888	1.18114	0.14058	1	16
GO:0042802	molecular_function	identical protein binding	576/30771	748/40888	1.02323	0.140751	1	576
GO:0048868	biological_process	pollen tube development	297/30771	382/40888	1.03311	0.14093	1	297
GO:0016717	molecular_function	oxidoreductase activity, acting on paired donors, with oxidation of a pair of donors resulting in the reduction of molecular oxygen to two molecules of water	92/30771	115/40888	1.06303	0.141035	1	92
GO:0045490	biological_process	pectin catabolic process	50/30771	61/40888	1.08917	0.141903	1	50
GO:0004629	molecular_function	phospholipase C activity	24/30771	28/40888	1.13896	0.14202	1	24
GO:2000652	biological_process	regulation of secondary cell wall biogenesis	24/30771	28/40888	1.13896	0.14202	1	24
GO:0000149	molecular_function	SNARE binding	85/30771	106/40888	1.06553	0.14256	1	85
GO:0000972	biological_process	transcription-dependent tethering of RNA polymerase II gene DNA at nuclear periphery	20/30771	23/40888	1.15546	0.142997	1	20
GO:0010022	biological_process	meristem determinacy	20/30771	23/40888	1.15546	0.142997	1	20
GO:0010112	biological_process	regulation of systemic acquired resistance	20/30771	23/40888	1.15546	0.142997	1	20
GO:0015385	molecular_function	sodium:proton antiporter activity	20/30771	23/40888	1.15546	0.142997	1	20
GO:0035725	biological_process	sodium ion transmembrane transport	20/30771	23/40888	1.15546	0.142997	1	20
GO:0051123	biological_process	RNA polymerase II preinitiation complex assembly	20/30771	23/40888	1.15546	0.142997	1	20
GO:0070897	biological_process	transcription preinitiation complex assembly	20/30771	23/40888	1.15546	0.142997	1	20
GO:0098719	biological_process	sodium ion import across plasma membrane	20/30771	23/40888	1.15546	0.142997	1	20
GO:0035967	biological_process	cellular response to topologically incorrect protein	329/30771	424/40888	1.03106	0.143182	1	329
GO:1901000	biological_process	regulation of response to salt stress	102/30771	128/40888	1.05887	0.143733	1	102
GO:0009521	cellular_component	photosystem	78/30771	97/40888	1.06851	0.143757	1	78
GO:0008097	molecular_function	5S rRNA binding	39/30771	47/40888	1.10261	0.143787	1	39
GO:0008216	biological_process	spermidine metabolic process	39/30771	47/40888	1.10261	0.143787	1	39
GO:0032511	biological_process	late endosome to vacuole transport via multivesicular body sorting pathway	39/30771	47/40888	1.10261	0.143787	1	39
GO:0032875	biological_process	regulation of DNA endoreduplication	39/30771	47/40888	1.10261	0.143787	1	39
GO:0071368	biological_process	cellular response to cytokinin stimulus	159/30771	202/40888	1.04592	0.144239	1	159
GO:0004029	molecular_function	aldehyde dehydrogenase (NAD) activity	112/30771	141/40888	1.05549	0.145561	1	112
GO:0003746	molecular_function	translation elongation factor activity	280/30771	360/40888	1.0335	0.146095	1	280
GO:0009555	biological_process	pollen development	511/30771	663/40888	1.02415	0.147174	1	511
GO:0045182	molecular_function	translation regulator activity	600/30771	780/40888	1.02214	0.147382	1	600
GO:0009266	biological_process	response to temperature stimulus	1217/30771	1593/40888	1.01515	0.147693	1	1217
GO:0000911	biological_process	cytokinesis by cell plate formation	105/30771	132/40888	1.05699	0.14808	1	105
GO:0072507	biological_process	divalent inorganic cation homeostasis	185/30771	236/40888	1.04163	0.148155	1	185
GO:0006144	biological_process	purine nucleobase metabolic process	46/30771	56/40888	1.0915	0.148386	1	46
GO:0051701	biological_process	interaction with host	46/30771	56/40888	1.0915	0.148386	1	46
GO:0010033	biological_process	response to organic substance	2901/30771	3819/40888	1.00937	0.148785	1	2901
GO:0033176	cellular_component	proton-transporting V-type ATPase complex	175/30771	223/40888	1.04277	0.149076	1	175
GO:0009827	biological_process	plant-type cell wall modification	35/30771	42/40888	1.10732	0.149557	1	35
GO:0015205	molecular_function	nucleobase transmembrane transporter activity	35/30771	42/40888	1.10732	0.149557	1	35
GO:0015851	biological_process	nucleobase transport	35/30771	42/40888	1.10732	0.149557	1	35
GO:0033612	molecular_function	receptor serine/threonine kinase binding	35/30771	42/40888	1.10732	0.149557	1	35
GO:0046294	biological_process	formaldehyde catabolic process	35/30771	42/40888	1.10732	0.149557	1	35
GO:0110095	biological_process	cellular detoxification of aldehyde	35/30771	42/40888	1.10732	0.149557	1	35
GO:0110096	biological_process	cellular response to aldehyde	35/30771	42/40888	1.10732	0.149557	1	35
GO:0140104	molecular_function	molecular carrier activity	35/30771	42/40888	1.10732	0.149557	1	35
GO:0048518	biological_process	positive regulation of biological process	1812/30771	2379/40888	1.01209	0.150269	1	1812
GO:0019842	molecular_function	vitamin binding	421/30771	545/40888	1.02645	0.15032	1	421
GO:0006816	biological_process	calcium ion transport	155/30771	197/40888	1.04549	0.150399	1	155
GO:0090079	molecular_function	translation regulator activity, nucleic acid binding	593/30771	771/40888	1.02201	0.150475	1	593
GO:0016645	molecular_function	oxidoreductase activity, acting on the CH-NH group of donors	74/30771	92/40888	1.0688	0.15073	1	74
GO:1902074	biological_process	response to salt	53/30771	65/40888	1.08347	0.15075	1	53
GO:0051170	biological_process	import into nucleus	108/30771	136/40888	1.05521	0.152315	1	108
GO:0007186	biological_process	G protein-coupled receptor signaling pathway	91/30771	114/40888	1.0607	0.152799	1	91
GO:0044432	cellular_component	endoplasmic reticulum part	1484/30771	1946/40888	1.01332	0.153127	1	1484
GO:2000024	biological_process	regulation of leaf development	118/30771	149/40888	1.05233	0.153407	1	118
GO:0055088	biological_process	lipid homeostasis	84/30771	105/40888	1.06303	0.154895	1	84
GO:0000075	biological_process	cell cycle checkpoint	42/30771	51/40888	1.09429	0.155172	1	42
GO:0010492	biological_process	maintenance of shoot apical meristem identity	42/30771	51/40888	1.09429	0.155172	1	42
GO:0006103	biological_process	2-oxoglutarate metabolic process	31/30771	37/40888	1.11331	0.155277	1	31
GO:0006265	biological_process	DNA topological change	31/30771	37/40888	1.11331	0.155277	1	31
GO:0006531	biological_process	aspartate metabolic process	31/30771	37/40888	1.11331	0.155277	1	31
GO:0030071	biological_process	regulation of mitotic metaphase/anaphase transition	31/30771	37/40888	1.11331	0.155277	1	31
GO:1902099	biological_process	regulation of metaphase/anaphase transition of cell cycle	31/30771	37/40888	1.11331	0.155277	1	31
GO:0008135	molecular_function	translation factor activity, RNA binding	592/30771	770/40888	1.02161	0.155315	1	592
GO:0044431	cellular_component	Golgi apparatus part	1274/30771	1669/40888	1.0143	0.155857	1	1274
GO:0034504	biological_process	protein localization to nucleus	111/30771	140/40888	1.05354	0.15644	1	111
GO:0098573	cellular_component	intrinsic component of mitochondrial membrane	111/30771	140/40888	1.05354	0.15644	1	111
GO:0005635	cellular_component	nuclear envelope	220/30771	282/40888	1.03664	0.156749	1	220
GO:0009735	biological_process	response to cytokinin	197/30771	252/40888	1.03877	0.157739	1	197
GO:0006526	biological_process	arginine biosynthetic process	63/30771	78/40888	1.07325	0.159018	1	63
GO:0043200	biological_process	response to amino acid	63/30771	78/40888	1.07325	0.159018	1	63
GO:0048653	biological_process	anther development	63/30771	78/40888	1.07325	0.159018	1	63
GO:0016682	molecular_function	oxidoreductase activity, acting on diphenols and related substances as donors, oxygen as acceptor	56/30771	69/40888	1.07843	0.159098	1	56
GO:0030244	biological_process	cellulose biosynthetic process	114/30771	144/40888	1.05195	0.16046	1	114
GO:0006089	biological_process	lactate metabolic process	27/30771	32/40888	1.12116	0.160743	1	27
GO:0009438	biological_process	methylglyoxal metabolic process	27/30771	32/40888	1.12116	0.160743	1	27
GO:0015112	molecular_function	nitrate transmembrane transporter activity	27/30771	32/40888	1.12116	0.160743	1	27
GO:0043024	molecular_function	ribosomal small subunit binding	27/30771	32/40888	1.12116	0.160743	1	27
GO:0051596	biological_process	methylglyoxal catabolic process	27/30771	32/40888	1.12116	0.160743	1	27
GO:0009250	biological_process	glucan biosynthetic process	226/30771	290/40888	1.03553	0.160893	1	226
GO:0098771	biological_process	inorganic ion homeostasis	470/30771	610/40888	1.02382	0.162014	1	470
GO:0031497	biological_process	chromatin assembly	80/30771	100/40888	1.06303	0.162469	1	80
GO:0000212	biological_process	meiotic spindle organization	11/30771	12/40888	1.21805	0.163171	1	11
GO:0004030	molecular_function	aldehyde dehydrogenase [NAD(P)+] activity	11/30771	12/40888	1.21805	0.163171	1	11
GO:0004368	molecular_function	glycerol-3-phosphate dehydrogenase (quinone) activity	11/30771	12/40888	1.21805	0.163171	1	11
GO:0006127	biological_process	glycerophosphate shuttle	11/30771	12/40888	1.21805	0.163171	1	11
GO:0006624	biological_process	vacuolar protein processing	11/30771	12/40888	1.21805	0.163171	1	11
GO:0006821	biological_process	chloride transport	11/30771	12/40888	1.21805	0.163171	1	11
GO:0010206	biological_process	photosystem II repair	11/30771	12/40888	1.21805	0.163171	1	11
GO:0016842	molecular_function	amidine-lyase activity	11/30771	12/40888	1.21805	0.163171	1	11
GO:0016901	molecular_function	oxidoreductase activity, acting on the CH-OH group of donors, quinone or similar compound as acceptor	11/30771	12/40888	1.21805	0.163171	1	11
GO:0017040	molecular_function	N-acylsphingosine amidohydrolase activity	11/30771	12/40888	1.21805	0.163171	1	11
GO:0018344	biological_process	protein geranylgeranylation	11/30771	12/40888	1.21805	0.163171	1	11
GO:0019955	molecular_function	cytokine binding	11/30771	12/40888	1.21805	0.163171	1	11
GO:0031207	cellular_component	Sec62/Sec63 complex	11/30771	12/40888	1.21805	0.163171	1	11
GO:0032147	biological_process	activation of protein kinase activity	11/30771	12/40888	1.21805	0.163171	1	11
GO:0033239	biological_process	negative regulation of cellular amine metabolic process	11/30771	12/40888	1.21805	0.163171	1	11
GO:0045763	biological_process	negative regulation of cellular amino acid metabolic process	11/30771	12/40888	1.21805	0.163171	1	11
GO:0046514	biological_process	ceramide catabolic process	11/30771	12/40888	1.21805	0.163171	1	11
GO:0047501	molecular_function	(+)-neomenthol dehydrogenase activity	11/30771	12/40888	1.21805	0.163171	1	11
GO:0048487	molecular_function	beta-tubulin binding	11/30771	12/40888	1.21805	0.163171	1	11
GO:0048577	biological_process	negative regulation of short-day photoperiodism, flowering	11/30771	12/40888	1.21805	0.163171	1	11
GO:0050269	molecular_function	coniferyl-aldehyde dehydrogenase activity	11/30771	12/40888	1.21805	0.163171	1	11
GO:0051723	molecular_function	protein methylesterase activity	11/30771	12/40888	1.21805	0.163171	1	11
GO:0051766	molecular_function	inositol trisphosphate kinase activity	11/30771	12/40888	1.21805	0.163171	1	11
GO:0052590	molecular_function	sn-glycerol-3-phosphate:ubiquinone oxidoreductase activity	11/30771	12/40888	1.21805	0.163171	1	11
GO:0052591	molecular_function	sn-glycerol-3-phosphate:ubiquinone-8 oxidoreductase activity	11/30771	12/40888	1.21805	0.163171	1	11
GO:0052725	molecular_function	inositol-1,3,4-trisphosphate 6-kinase activity	11/30771	12/40888	1.21805	0.163171	1	11
GO:0080136	biological_process	priming of cellular response to stress	11/30771	12/40888	1.21805	0.163171	1	11
GO:0099094	molecular_function	ligand-gated cation channel activity	11/30771	12/40888	1.21805	0.163171	1	11
GO:0102121	molecular_function	ceramidase activity	11/30771	12/40888	1.21805	0.163171	1	11
GO:0102985	molecular_function	Delta12-fatty-acid desaturase activity	11/30771	12/40888	1.21805	0.163171	1	11
GO:0005819	cellular_component	spindle	219/30771	281/40888	1.0356	0.164886	1	219
GO:0042440	biological_process	pigment metabolic process	219/30771	281/40888	1.0356	0.164886	1	219
GO:0009892	biological_process	negative regulation of metabolic process	1065/30771	1394/40888	1.01518	0.165123	1	1065
GO:0032784	biological_process	regulation of DNA-templated transcription, elongation	90/30771	113/40888	1.05832	0.165278	1	90
GO:0010188	biological_process	response to microbial phytotoxin	23/30771	27/40888	1.13193	0.165577	1	23
GO:0043102	biological_process	amino acid salvage	23/30771	27/40888	1.13193	0.165577	1	23
GO:0071267	biological_process	L-methionine salvage	23/30771	27/40888	1.13193	0.165577	1	23
GO:0043067	biological_process	regulation of programmed cell death	183/30771	234/40888	1.03918	0.165604	1	183
GO:0051213	molecular_function	dioxygenase activity	183/30771	234/40888	1.03918	0.165604	1	183
GO:0031348	biological_process	negative regulation of defense response	160/30771	204/40888	1.04218	0.165648	1	160
GO:0045254	cellular_component	pyruvate dehydrogenase complex	45/30771	55/40888	1.08719	0.165712	1	45
GO:0030162	biological_process	regulation of proteolysis	66/30771	82/40888	1.06951	0.166036	1	66
GO:0009605	biological_process	response to external stimulus	2333/30771	3070/40888	1.00979	0.168128	1	2333
GO:0051128	biological_process	regulation of cellular component organization	829/30771	1083/40888	1.01714	0.168309	1	829
GO:0015181	molecular_function	arginine transmembrane transporter activity	19/30771	22/40888	1.14759	0.169043	1	19
GO:0016157	molecular_function	sucrose synthase activity	19/30771	22/40888	1.14759	0.169043	1	19
GO:0050829	biological_process	defense response to Gram-negative bacterium	19/30771	22/40888	1.14759	0.169043	1	19
GO:0070370	biological_process	cellular heat acclimation	19/30771	22/40888	1.14759	0.169043	1	19
GO:0000156	molecular_function	phosphorelay response regulator activity	15/30771	17/40888	1.17246	0.169561	1	15
GO:0004028	molecular_function	3-chloroallyl aldehyde dehydrogenase activity	15/30771	17/40888	1.17246	0.169561	1	15
GO:0004930	molecular_function	G protein-coupled receptor activity	15/30771	17/40888	1.17246	0.169561	1	15
GO:0008053	biological_process	mitochondrial fusion	15/30771	17/40888	1.17246	0.169561	1	15
GO:0008146	molecular_function	sulfotransferase activity	15/30771	17/40888	1.17246	0.169561	1	15
GO:0008327	molecular_function	methyl-CpG binding	15/30771	17/40888	1.17246	0.169561	1	15
GO:0019320	biological_process	hexose catabolic process	15/30771	17/40888	1.17246	0.169561	1	15
GO:0031543	molecular_function	peptidyl-proline dioxygenase activity	15/30771	17/40888	1.17246	0.169561	1	15
GO:0033356	biological_process	UDP-L-arabinose metabolic process	15/30771	17/40888	1.17246	0.169561	1	15
GO:0034982	biological_process	mitochondrial protein processing	15/30771	17/40888	1.17246	0.169561	1	15
GO:1901403	biological_process	positive regulation of tetrapyrrole metabolic process	15/30771	17/40888	1.17246	0.169561	1	15
GO:2000014	biological_process	regulation of endosperm development	15/30771	17/40888	1.17246	0.169561	1	15
GO:0005793	cellular_component	endoplasmic reticulum-Golgi intermediate compartment	34/30771	41/40888	1.10192	0.169605	1	34
GO:0006021	biological_process	inositol biosynthetic process	34/30771	41/40888	1.10192	0.169605	1	34
GO:0006026	biological_process	aminoglycan catabolic process	34/30771	41/40888	1.10192	0.169605	1	34
GO:0006030	biological_process	chitin metabolic process	34/30771	41/40888	1.10192	0.169605	1	34
GO:0006032	biological_process	chitin catabolic process	34/30771	41/40888	1.10192	0.169605	1	34
GO:0006121	biological_process	mitochondrial electron transport, succinate to ubiquinone	34/30771	41/40888	1.10192	0.169605	1	34
GO:0006829	biological_process	zinc ion transport	34/30771	41/40888	1.10192	0.169605	1	34
GO:0009554	biological_process	megasporogenesis	34/30771	41/40888	1.10192	0.169605	1	34
GO:0046348	biological_process	amino sugar catabolic process	34/30771	41/40888	1.10192	0.169605	1	34
GO:1901072	biological_process	glucosamine-containing compound catabolic process	34/30771	41/40888	1.10192	0.169605	1	34
GO:0046933	molecular_function	proton-transporting ATP synthase activity, rotational mechanism	123/30771	156/40888	1.04769	0.171929	1	123
GO:0043207	biological_process	response to external biotic stimulus	1733/30771	2277/40888	1.01132	0.172511	1	1733
GO:0051707	biological_process	response to other organism	1733/30771	2277/40888	1.01132	0.172511	1	1733
GO:0032504	biological_process	multicellular organism reproduction	231/30771	297/40888	1.0335	0.173131	1	231
GO:0030243	biological_process	cellulose metabolic process	146/30771	186/40888	1.04302	0.173864	1	146
GO:1901001	biological_process	negative regulation of response to salt stress	41/30771	50/40888	1.0896	0.173872	1	41
GO:0010605	biological_process	negative regulation of macromolecule metabolic process	975/30771	1276/40888	1.01533	0.174415	1	975
GO:0006334	biological_process	nucleosome assembly	62/30771	77/40888	1.06993	0.17446	1	62
GO:0006367	biological_process	transcription initiation from RNA polymerase II promoter	62/30771	77/40888	1.06993	0.17446	1	62
GO:0000307	cellular_component	cyclin-dependent protein kinase holoenzyme complex	96/30771	121/40888	1.05424	0.174983	1	96
GO:0034663	cellular_component	endoplasmic reticulum chaperone complex	48/30771	59/40888	1.08104	0.1755	1	48
GO:0061013	biological_process	regulation of mRNA catabolic process	48/30771	59/40888	1.08104	0.1755	1	48
GO:0009523	cellular_component	photosystem II	55/30771	68/40888	1.07475	0.175502	1	55
GO:0019932	biological_process	second-messenger-mediated signaling	55/30771	68/40888	1.07475	0.175502	1	55
GO:0004252	molecular_function	serine-type endopeptidase activity	126/30771	160/40888	1.04642	0.175567	1	126
GO:0009083	biological_process	branched-chain amino acid catabolic process	116/30771	147/40888	1.04856	0.175906	1	116
GO:0005345	molecular_function	purine nucleobase transmembrane transporter activity	30/30771	36/40888	1.10732	0.177162	1	30
GO:0006863	biological_process	purine nucleobase transport	30/30771	36/40888	1.10732	0.177162	1	30
GO:0009884	molecular_function	cytokinin receptor activity	30/30771	36/40888	1.10732	0.177162	1	30
GO:0019239	molecular_function	deaminase activity	30/30771	36/40888	1.10732	0.177162	1	30
GO:0033549	molecular_function	MAP kinase phosphatase activity	30/30771	36/40888	1.10732	0.177162	1	30
GO:0051304	biological_process	chromosome separation	30/30771	36/40888	1.10732	0.177162	1	30
GO:0098659	biological_process	inorganic cation import across plasma membrane	30/30771	36/40888	1.10732	0.177162	1	30
GO:0099587	biological_process	inorganic ion import across plasma membrane	30/30771	36/40888	1.10732	0.177162	1	30
GO:0051273	biological_process	beta-glucan metabolic process	198/30771	254/40888	1.03582	0.177681	1	198
GO:1901700	biological_process	response to oxygen-containing compound	2354/30771	3099/40888	1.00934	0.178392	1	2354
GO:0003676	molecular_function	nucleic acid binding	7266/30771	9609/40888	1.00478	0.178574	1	7266
GO:0048646	biological_process	anatomical structure formation involved in morphogenesis	240/30771	309/40888	1.03206	0.179056	1	240
GO:0005315	molecular_function	inorganic phosphate transmembrane transporter activity	72/30771	90/40888	1.06303	0.179109	1	72
GO:0031090	cellular_component	organelle membrane	4969/30771	6563/40888	1.00605	0.179443	1	4969
GO:0000702	molecular_function	oxidized base lesion DNA N-glycosylase activity	6/30771	6/40888	1.32878	0.181644	1	6
GO:0004354	molecular_function	glutamate dehydrogenase (NADP+) activity	6/30771	6/40888	1.32878	0.181644	1	6
GO:0005872	cellular_component	minus-end kinesin complex	6/30771	6/40888	1.32878	0.181644	1	6
GO:0006666	biological_process	3-keto-sphinganine metabolic process	6/30771	6/40888	1.32878	0.181644	1	6
GO:0006990	biological_process	positive regulation of transcription from RNA polymerase II promoter involved in unfolded protein response	6/30771	6/40888	1.32878	0.181644	1	6
GO:0007053	biological_process	spindle assembly involved in male meiosis	6/30771	6/40888	1.32878	0.181644	1	6
GO:0008710	molecular_function	8-amino-7-oxononanoate synthase activity	6/30771	6/40888	1.32878	0.181644	1	6
GO:0008878	molecular_function	glucose-1-phosphate adenylyltransferase activity	6/30771	6/40888	1.32878	0.181644	1	6
GO:0009971	biological_process	anastral spindle assembly involved in male meiosis	6/30771	6/40888	1.32878	0.181644	1	6
GO:0010213	biological_process	non-photoreactive DNA repair	6/30771	6/40888	1.32878	0.181644	1	6
GO:0010322	biological_process	regulation of isopentenyl diphosphate biosynthetic process, methylerythritol 4-phosphate pathway	6/30771	6/40888	1.32878	0.181644	1	6
GO:0015633	molecular_function	ATPase-coupled zinc transmembrane transporter activity	6/30771	6/40888	1.32878	0.181644	1	6
GO:0016123	biological_process	xanthophyll biosynthetic process	6/30771	6/40888	1.32878	0.181644	1	6
GO:0016463	molecular_function	zinc transmembrane transporter activity, phosphorylative mechanism	6/30771	6/40888	1.32878	0.181644	1	6
GO:0017198	biological_process	N-terminal peptidyl-serine acetylation	6/30771	6/40888	1.32878	0.181644	1	6
GO:0018002	biological_process	N-terminal peptidyl-glutamic acid acetylation	6/30771	6/40888	1.32878	0.181644	1	6
GO:0018200	biological_process	peptidyl-glutamic acid modification	6/30771	6/40888	1.32878	0.181644	1	6
GO:0018315	biological_process	molybdenum incorporation into molybdenum-molybdopterin complex	6/30771	6/40888	1.32878	0.181644	1	6
GO:0030920	biological_process	peptidyl-serine acetylation	6/30771	6/40888	1.32878	0.181644	1	6
GO:0030951	biological_process	establishment or maintenance of microtubule cytoskeleton polarity	6/30771	6/40888	1.32878	0.181644	1	6
GO:0030952	biological_process	establishment or maintenance of cytoskeleton polarity	6/30771	6/40888	1.32878	0.181644	1	6
GO:0031415	cellular_component	NatA complex	6/30771	6/40888	1.32878	0.181644	1	6
GO:0031930	biological_process	mitochondria-nucleus signaling pathway	6/30771	6/40888	1.32878	0.181644	1	6
GO:0033186	cellular_component	CAF-1 complex	6/30771	6/40888	1.32878	0.181644	1	6
GO:0042040	biological_process	metal incorporation into metallo-molybdopterin complex	6/30771	6/40888	1.32878	0.181644	1	6
GO:0042721	cellular_component	TIM22 mitochondrial import inner membrane insertion complex	6/30771	6/40888	1.32878	0.181644	1	6
GO:0043014	molecular_function	alpha-tubulin binding	6/30771	6/40888	1.32878	0.181644	1	6
GO:0043748	molecular_function	O-succinylbenzoate synthase activity	6/30771	6/40888	1.32878	0.181644	1	6
GO:0045056	biological_process	transcytosis	6/30771	6/40888	1.32878	0.181644	1	6
GO:0047560	molecular_function	3-dehydrosphinganine reductase activity	6/30771	6/40888	1.32878	0.181644	1	6
GO:0052894	molecular_function	norspermine:oxygen oxidoreductase activity	6/30771	6/40888	1.32878	0.181644	1	6
GO:0055048	biological_process	anastral spindle assembly	6/30771	6/40888	1.32878	0.181644	1	6
GO:0061863	molecular_function	microtubule plus end polymerase	6/30771	6/40888	1.32878	0.181644	1	6
GO:0070204	molecular_function	2-succinyl-5-enolpyruvyl-6-hydroxy-3-cyclohexene-1-carboxylic-acid synthase activity	6/30771	6/40888	1.32878	0.181644	1	6
GO:0070205	molecular_function	2-succinyl-6-hydroxy-2,4-cyclohexadiene-1-carboxylate synthase activity	6/30771	6/40888	1.32878	0.181644	1	6
GO:0071071	biological_process	regulation of phospholipid biosynthetic process	6/30771	6/40888	1.32878	0.181644	1	6
GO:0120091	molecular_function	jasmonic acid hydrolase	6/30771	6/40888	1.32878	0.181644	1	6
GO:1901522	biological_process	positive regulation of transcription from RNA polymerase II promoter involved in cellular response to chemical stimulus	6/30771	6/40888	1.32878	0.181644	1	6
GO:1902478	biological_process	negative regulation of defense response to bacterium, incompatible interaction	6/30771	6/40888	1.32878	0.181644	1	6
GO:1903725	biological_process	regulation of phospholipid metabolic process	6/30771	6/40888	1.32878	0.181644	1	6
GO:1990189	molecular_function	peptide-serine-N-acetyltransferase activity	6/30771	6/40888	1.32878	0.181644	1	6
GO:1990190	molecular_function	peptide-glutamate-N-acetyltransferase activity	6/30771	6/40888	1.32878	0.181644	1	6
GO:0042221	biological_process	response to chemical	4673/30771	6171/40888	1.00622	0.181679	1	4673
GO:0005938	cellular_component	cell cortex	217/30771	279/40888	1.0335	0.182037	1	217
GO:0044843	biological_process	cell cycle G1/S phase transition	37/30771	45/40888	1.09256	0.182526	1	37
GO:0046271	biological_process	phenylpropanoid catabolic process	37/30771	45/40888	1.09256	0.182526	1	37
GO:0009581	biological_process	detection of external stimulus	102/30771	129/40888	1.05067	0.184075	1	102
GO:0009582	biological_process	detection of abiotic stimulus	102/30771	129/40888	1.05067	0.184075	1	102
GO:0009739	biological_process	response to gibberellin	102/30771	129/40888	1.05067	0.184075	1	102
GO:0043244	biological_process	regulation of protein complex disassembly	102/30771	129/40888	1.05067	0.184075	1	102
GO:0005983	biological_process	starch catabolic process	26/30771	31/40888	1.11446	0.184797	1	26
GO:0009095	biological_process	aromatic amino acid family biosynthetic process, prephenate pathway	26/30771	31/40888	1.11446	0.184797	1	26
GO:0032885	biological_process	regulation of polysaccharide biosynthetic process	26/30771	31/40888	1.11446	0.184797	1	26
GO:0047262	molecular_function	polygalacturonate 4-alpha-galacturonosyltransferase activity	26/30771	31/40888	1.11446	0.184797	1	26
GO:0004721	molecular_function	phosphoprotein phosphatase activity	236/30771	304/40888	1.03156	0.185584	1	236
GO:0016407	molecular_function	acetyltransferase activity	184/30771	236/40888	1.036	0.186962	1	184
GO:0009965	biological_process	leaf morphogenesis	125/30771	159/40888	1.04464	0.187148	1	125
GO:0016620	molecular_function	oxidoreductase activity, acting on the aldehyde or oxo group of donors, NAD or NADP as acceptor	239/30771	308/40888	1.0311	0.187541	1	239
GO:0048367	biological_process	shoot system development	1078/30771	1413/40888	1.01375	0.188086	1	1078
GO:0030515	molecular_function	snoRNA binding	95/30771	120/40888	1.05195	0.188241	1	95
GO:0060341	biological_process	regulation of cellular localization	68/30771	85/40888	1.06303	0.188274	1	68
GO:0006606	biological_process	protein import into nucleus	105/30771	133/40888	1.04904	0.188409	1	105
GO:0008643	biological_process	carbohydrate transport	213/30771	274/40888	1.03296	0.188903	1	213
GO:0009556	biological_process	microsporogenesis	61/30771	76/40888	1.06652	0.190984	1	61
GO:0032880	biological_process	regulation of protein localization	61/30771	76/40888	1.06652	0.190984	1	61
GO:0048528	biological_process	post-embryonic root development	164/30771	210/40888	1.03772	0.191491	1	164
GO:0051274	biological_process	beta-glucan biosynthetic process	164/30771	210/40888	1.03772	0.191491	1	164
GO:0004473	molecular_function	malate dehydrogenase (decarboxylating) (NADP+) activity	33/30771	40/40888	1.09625	0.191697	1	33
GO:0015145	molecular_function	monosaccharide transmembrane transporter activity	33/30771	40/40888	1.09625	0.191697	1	33
GO:0022821	molecular_function	potassium ion antiporter activity	33/30771	40/40888	1.09625	0.191697	1	33
GO:0043271	biological_process	negative regulation of ion transport	33/30771	40/40888	1.09625	0.191697	1	33
GO:0045735	molecular_function	nutrient reservoir activity	33/30771	40/40888	1.09625	0.191697	1	33
GO:0005853	cellular_component	eukaryotic translation elongation factor 1 complex	22/30771	26/40888	1.12436	0.192243	1	22
GO:0008271	molecular_function	secondary active sulfate transmembrane transporter activity	22/30771	26/40888	1.12436	0.192243	1	22
GO:0015172	molecular_function	acidic amino acid transmembrane transporter activity	22/30771	26/40888	1.12436	0.192243	1	22
GO:0015174	molecular_function	basic amino acid transmembrane transporter activity	22/30771	26/40888	1.12436	0.192243	1	22
GO:0015189	molecular_function	L-lysine transmembrane transporter activity	22/30771	26/40888	1.12436	0.192243	1	22
GO:0019509	biological_process	L-methionine salvage from methylthioadenosine	22/30771	26/40888	1.12436	0.192243	1	22
GO:0071782	cellular_component	endoplasmic reticulum tubular network	22/30771	26/40888	1.12436	0.192243	1	22
GO:0098827	cellular_component	endoplasmic reticulum subcompartment	22/30771	26/40888	1.12436	0.192243	1	22
GO:0006403	biological_process	RNA localization	277/30771	358/40888	1.02814	0.192531	1	277
GO:0006108	biological_process	malate metabolic process	108/30771	137/40888	1.04751	0.192613	1	108
GO:0044264	biological_process	cellular polysaccharide metabolic process	395/30771	513/40888	1.02314	0.193195	1	395
GO:0002237	biological_process	response to molecule of bacterial origin	131/30771	167/40888	1.04234	0.19418	1	131
GO:0016413	molecular_function	O-acetyltransferase activity	40/30771	49/40888	1.08472	0.19425	1	40
GO:0051983	biological_process	regulation of chromosome segregation	47/30771	58/40888	1.07677	0.194404	1	47
GO:0006520	biological_process	cellular amino acid metabolic process	1397/30771	1835/40888	1.01161	0.195176	1	1397
GO:0048731	biological_process	system development	2536/30771	3342/40888	1.00832	0.196739	1	2536
GO:0009145	biological_process	purine nucleoside triphosphate biosynthetic process	101/30771	128/40888	1.04849	0.197346	1	101
GO:0009205	biological_process	purine ribonucleoside triphosphate metabolic process	101/30771	128/40888	1.04849	0.197346	1	101
GO:0009206	biological_process	purine ribonucleoside triphosphate biosynthetic process	101/30771	128/40888	1.04849	0.197346	1	101
GO:0044448	cellular_component	cell cortex part	101/30771	128/40888	1.04849	0.197346	1	101
GO:2000028	biological_process	regulation of photoperiodism, flowering	101/30771	128/40888	1.04849	0.197346	1	101
GO:0016567	biological_process	protein ubiquitination	807/30771	1056/40888	1.01546	0.197624	1	807
GO:0045927	biological_process	positive regulation of growth	64/30771	80/40888	1.06303	0.198083	1	64
GO:0030154	biological_process	cell differentiation	985/30771	1291/40888	1.01383	0.198698	1	985
GO:0001101	biological_process	response to acid chemical	1725/30771	2269/40888	1.0102	0.198749	1	1725
GO:0003400	biological_process	regulation of COPII vesicle coating	18/30771	21/40888	1.13896	0.198933	1	18
GO:0003933	molecular_function	GTP cyclohydrolase activity	18/30771	21/40888	1.13896	0.198933	1	18
GO:0005663	cellular_component	DNA replication factor C complex	18/30771	21/40888	1.13896	0.198933	1	18
GO:0010582	biological_process	floral meristem determinacy	18/30771	21/40888	1.13896	0.198933	1	18
GO:0070861	biological_process	regulation of protein exit from endoplasmic reticulum	18/30771	21/40888	1.13896	0.198933	1	18
GO:0070863	biological_process	positive regulation of protein exit from endoplasmic reticulum	18/30771	21/40888	1.13896	0.198933	1	18
GO:0071902	biological_process	positive regulation of protein serine/threonine kinase activity	18/30771	21/40888	1.13896	0.198933	1	18
GO:0090113	biological_process	regulation of ER to Golgi vesicle-mediated transport by GTP hydrolysis	18/30771	21/40888	1.13896	0.198933	1	18
GO:0000272	biological_process	polysaccharide catabolic process	160/30771	205/40888	1.0371	0.199401	1	160
GO:0006458	biological_process	'de novo' protein folding	244/30771	315/40888	1.02928	0.200133	1	244
GO:0006778	biological_process	porphyrin-containing compound metabolic process	114/30771	145/40888	1.0447	0.20065	1	114
GO:0009570	cellular_component	chloroplast stroma	997/30771	1307/40888	1.01362	0.200872	1	997
GO:0016556	biological_process	mRNA modification	57/30771	71/40888	1.06677	0.201113	1	57
GO:0042182	biological_process	ketone catabolic process	29/30771	35/40888	1.10099	0.201397	1	29
GO:0042304	biological_process	regulation of fatty acid biosynthetic process	29/30771	35/40888	1.10099	0.201397	1	29
GO:0043087	biological_process	regulation of GTPase activity	29/30771	35/40888	1.10099	0.201397	1	29
GO:0043547	biological_process	positive regulation of GTPase activity	29/30771	35/40888	1.10099	0.201397	1	29
GO:0048638	biological_process	regulation of developmental growth	189/30771	243/40888	1.0335	0.201812	1	189
GO:0071456	biological_process	cellular response to hypoxia	189/30771	243/40888	1.0335	0.201812	1	189
GO:0000229	cellular_component	cytoplasmic chromosome	10/30771	11/40888	1.20799	0.202416	1	10
GO:0000808	cellular_component	origin recognition complex	10/30771	11/40888	1.20799	0.202416	1	10
GO:0001055	molecular_function	RNA polymerase II activity	10/30771	11/40888	1.20799	0.202416	1	10
GO:0004143	molecular_function	diacylglycerol kinase activity	10/30771	11/40888	1.20799	0.202416	1	10
GO:0005664	cellular_component	nuclear origin of replication recognition complex	10/30771	11/40888	1.20799	0.202416	1	10
GO:0005814	cellular_component	centriole	10/30771	11/40888	1.20799	0.202416	1	10
GO:0009337	cellular_component	sulfite reductase complex (NADPH)	10/30771	11/40888	1.20799	0.202416	1	10
GO:0010222	biological_process	stem vascular tissue pattern formation	10/30771	11/40888	1.20799	0.202416	1	10
GO:0010296	molecular_function	prenylcysteine methylesterase activity	10/30771	11/40888	1.20799	0.202416	1	10
GO:0010366	biological_process	negative regulation of ethylene biosynthetic process	10/30771	11/40888	1.20799	0.202416	1	10
GO:0010452	biological_process	histone H3-K36 methylation	10/30771	11/40888	1.20799	0.202416	1	10
GO:0015790	biological_process	UDP-xylose transmembrane transport	10/30771	11/40888	1.20799	0.202416	1	10
GO:0016002	molecular_function	sulfite reductase activity	10/30771	11/40888	1.20799	0.202416	1	10
GO:0031336	biological_process	negative regulation of sulfur amino acid metabolic process	10/30771	11/40888	1.20799	0.202416	1	10
GO:0031936	biological_process	negative regulation of chromatin silencing	10/30771	11/40888	1.20799	0.202416	1	10
GO:0042937	molecular_function	tripeptide transmembrane transporter activity	10/30771	11/40888	1.20799	0.202416	1	10
GO:0045861	biological_process	negative regulation of proteolysis	10/30771	11/40888	1.20799	0.202416	1	10
GO:0046203	biological_process	spermidine catabolic process	10/30771	11/40888	1.20799	0.202416	1	10
GO:0047325	molecular_function	inositol tetrakisphosphate 1-kinase activity	10/30771	11/40888	1.20799	0.202416	1	10
GO:0051175	biological_process	negative regulation of sulfur metabolic process	10/30771	11/40888	1.20799	0.202416	1	10
GO:0052654	molecular_function	L-leucine transaminase activity	10/30771	11/40888	1.20799	0.202416	1	10
GO:0052655	molecular_function	L-valine transaminase activity	10/30771	11/40888	1.20799	0.202416	1	10
GO:0052656	molecular_function	L-isoleucine transaminase activity	10/30771	11/40888	1.20799	0.202416	1	10
GO:0052726	molecular_function	inositol-1,3,4-trisphosphate 5-kinase activity	10/30771	11/40888	1.20799	0.202416	1	10
GO:0052901	molecular_function	spermine:oxygen oxidoreductase (spermidine-forming) activity	10/30771	11/40888	1.20799	0.202416	1	10
GO:0060866	biological_process	leaf abscission	10/30771	11/40888	1.20799	0.202416	1	10
GO:0071323	biological_process	cellular response to chitin	10/30771	11/40888	1.20799	0.202416	1	10
GO:0090378	biological_process	seed trichome elongation	10/30771	11/40888	1.20799	0.202416	1	10
GO:1900367	biological_process	positive regulation of defense response to insect	10/30771	11/40888	1.20799	0.202416	1	10
GO:1900909	biological_process	negative regulation of olefin metabolic process	10/30771	11/40888	1.20799	0.202416	1	10
GO:1900912	biological_process	negative regulation of olefin biosynthetic process	10/30771	11/40888	1.20799	0.202416	1	10
GO:1905897	biological_process	regulation of response to endoplasmic reticulum stress	10/30771	11/40888	1.20799	0.202416	1	10
GO:0044550	biological_process	secondary metabolite biosynthetic process	218/30771	281/40888	1.03087	0.202481	1	218
GO:0006446	biological_process	regulation of translational initiation	50/30771	62/40888	1.0716	0.203532	1	50
GO:0000813	cellular_component	ESCRT I complex	14/30771	16/40888	1.16269	0.20354	1	14
GO:0003680	molecular_function	AT DNA binding	14/30771	16/40888	1.16269	0.20354	1	14
GO:0004567	molecular_function	beta-mannosidase activity	14/30771	16/40888	1.16269	0.20354	1	14
GO:0010332	biological_process	response to gamma radiation	14/30771	16/40888	1.16269	0.20354	1	14
GO:0014074	biological_process	response to purine-containing compound	14/30771	16/40888	1.16269	0.20354	1	14
GO:0016888	molecular_function	endodeoxyribonuclease activity, producing 5'-phosphomonoesters	14/30771	16/40888	1.16269	0.20354	1	14
GO:0016992	molecular_function	lipoate synthase activity	14/30771	16/40888	1.16269	0.20354	1	14
GO:0017108	molecular_function	5'-flap endonuclease activity	14/30771	16/40888	1.16269	0.20354	1	14
GO:0032776	biological_process	DNA methylation on cytosine	14/30771	16/40888	1.16269	0.20354	1	14
GO:0033919	molecular_function	glucan 1,3-alpha-glucosidase activity	14/30771	16/40888	1.16269	0.20354	1	14
GO:0035198	molecular_function	miRNA binding	14/30771	16/40888	1.16269	0.20354	1	14
GO:0043162	biological_process	ubiquitin-dependent protein catabolic process via the multivesicular body sorting pathway	14/30771	16/40888	1.16269	0.20354	1	14
GO:0048211	biological_process	Golgi vesicle docking	14/30771	16/40888	1.16269	0.20354	1	14
GO:0080132	molecular_function	fatty acid alpha-hydroxylase activity	14/30771	16/40888	1.16269	0.20354	1	14
GO:0090600	molecular_function	alpha-1,3-glucosidase activity	14/30771	16/40888	1.16269	0.20354	1	14
GO:0102552	molecular_function	lipoyl synthase activity (acting on glycine-cleavage complex H protein	14/30771	16/40888	1.16269	0.20354	1	14
GO:0102553	molecular_function	lipoyl synthase activity (acting on pyruvate dehydrogenase E2 protein)	14/30771	16/40888	1.16269	0.20354	1	14
GO:1901465	biological_process	positive regulation of tetrapyrrole biosynthetic process	14/30771	16/40888	1.16269	0.20354	1	14
GO:1902066	biological_process	regulation of cell wall pectin metabolic process	14/30771	16/40888	1.16269	0.20354	1	14
GO:2000068	biological_process	regulation of defense response to insect	14/30771	16/40888	1.16269	0.20354	1	14
GO:0009553	biological_process	embryo sac development	298/30771	386/40888	1.02585	0.203954	1	298
GO:0006208	biological_process	pyrimidine nucleobase catabolic process	36/30771	44/40888	1.08719	0.204676	1	36
GO:0071805	biological_process	potassium ion transmembrane transport	36/30771	44/40888	1.08719	0.204676	1	36
GO:1901879	biological_process	regulation of protein depolymerization	67/30771	84/40888	1.05986	0.204805	1	67
GO:0006406	biological_process	mRNA export from nucleus	43/30771	53/40888	1.07807	0.204948	1	43
GO:0007088	biological_process	regulation of mitotic nuclear division	43/30771	53/40888	1.07807	0.204948	1	43
GO:0035838	cellular_component	growing cell tip	43/30771	53/40888	1.07807	0.204948	1	43
GO:0051286	cellular_component	cell tip	43/30771	53/40888	1.07807	0.204948	1	43
GO:0071427	biological_process	mRNA-containing ribonucleoprotein complex export from nucleus	43/30771	53/40888	1.07807	0.204948	1	43
GO:0090404	cellular_component	pollen tube tip	43/30771	53/40888	1.07807	0.204948	1	43
GO:0047484	biological_process	regulation of response to osmotic stress	107/30771	136/40888	1.04544	0.20587	1	107
GO:0006865	biological_process	amino acid transport	130/30771	166/40888	1.04061	0.206267	1	130
GO:0009816	biological_process	defense response to bacterium, incompatible interaction	77/30771	97/40888	1.05481	0.206598	1	77
GO:0006206	biological_process	pyrimidine nucleobase metabolic process	87/30771	110/40888	1.05095	0.207134	1	87
GO:0061695	cellular_component	transferase complex, transferring phosphorus-containing groups	434/30771	565/40888	1.02069	0.208385	1	434
GO:0004842	molecular_function	ubiquitin-protein transferase activity	557/30771	727/40888	1.01806	0.208589	1	557
GO:0045047	biological_process	protein targeting to ER	60/30771	75/40888	1.06303	0.208608	1	60
GO:0045177	cellular_component	apical part of cell	60/30771	75/40888	1.06303	0.208608	1	60
GO:0072599	biological_process	establishment of protein localization to endoplasmic reticulum	60/30771	75/40888	1.06303	0.208608	1	60
GO:0051084	biological_process	'de novo' posttranslational protein folding	243/30771	314/40888	1.02833	0.209142	1	243
GO:0051085	biological_process	chaperone cofactor-dependent protein refolding	243/30771	314/40888	1.02833	0.209142	1	243
GO:0042775	biological_process	mitochondrial ATP synthesis coupled electron transport	110/30771	140/40888	1.04404	0.209933	1	110
GO:0009699	biological_process	phenylpropanoid biosynthetic process	159/30771	204/40888	1.03567	0.210507	1	159
GO:0006811	biological_process	ion transport	1222/30771	1605/40888	1.0117	0.21109	1	1222
GO:0001558	biological_process	regulation of cell growth	201/30771	259/40888	1.03122	0.211126	1	201
GO:0006813	biological_process	potassium ion transport	100/30771	127/40888	1.04629	0.211263	1	100
GO:0004333	molecular_function	fumarate hydratase activity	25/30771	30/40888	1.10732	0.211605	1	25
GO:0006106	biological_process	fumarate metabolic process	25/30771	30/40888	1.10732	0.211605	1	25
GO:0015386	molecular_function	potassium:proton antiporter activity	25/30771	30/40888	1.10732	0.211605	1	25
GO:0016143	biological_process	S-glycoside metabolic process	53/30771	66/40888	1.06705	0.212019	1	53
GO:0019757	biological_process	glycosinolate metabolic process	53/30771	66/40888	1.06705	0.212019	1	53
GO:0019760	biological_process	glucosinolate metabolic process	53/30771	66/40888	1.06705	0.212019	1	53
GO:0006551	biological_process	leucine metabolic process	90/30771	114/40888	1.04904	0.212077	1	90
GO:1903311	biological_process	regulation of mRNA metabolic process	136/30771	174/40888	1.03859	0.212936	1	136
GO:0051537	molecular_function	2 iron, 2 sulfur cluster binding	149/30771	191/40888	1.03659	0.213358	1	149
GO:0033045	biological_process	regulation of sister chromatid segregation	46/30771	57/40888	1.07235	0.21476	1	46
GO:0006323	biological_process	DNA packaging	103/30771	131/40888	1.04477	0.215569	1	103
GO:0006470	biological_process	protein dephosphorylation	103/30771	131/40888	1.04477	0.215569	1	103
GO:0009504	cellular_component	cell plate	63/30771	79/40888	1.05966	0.215665	1	63
GO:0006535	biological_process	cysteine biosynthetic process from serine	32/30771	39/40888	1.09028	0.215917	1	32
GO:0045551	molecular_function	cinnamyl-alcohol dehydrogenase activity	32/30771	39/40888	1.09028	0.215917	1	32
GO:0052747	molecular_function	sinapyl alcohol dehydrogenase activity	32/30771	39/40888	1.09028	0.215917	1	32
GO:0032051	molecular_function	clathrin light chain binding	39/30771	48/40888	1.07964	0.216356	1	39
GO:0051262	biological_process	protein tetramerization	39/30771	48/40888	1.07964	0.216356	1	39
GO:0071439	cellular_component	clathrin complex	39/30771	48/40888	1.07964	0.216356	1	39
GO:0009607	biological_process	response to biotic stimulus	1788/30771	2354/40888	1.00929	0.216642	1	1788
GO:0019684	biological_process	photosynthesis, light reaction	93/30771	118/40888	1.04726	0.216833	1	93
GO:0007346	biological_process	regulation of mitotic cell cycle	116/30771	148/40888	1.04148	0.217694	1	116
GO:0032259	biological_process	methylation	420/30771	547/40888	1.02027	0.21787	1	420
GO:0042546	biological_process	cell wall biogenesis	242/30771	313/40888	1.02737	0.218407	1	242
GO:0048437	biological_process	floral organ development	293/30771	380/40888	1.02456	0.219081	1	293
GO:0019953	biological_process	sexual reproduction	197/30771	254/40888	1.03059	0.219111	1	197
GO:0032350	biological_process	regulation of hormone metabolic process	106/30771	135/40888	1.04334	0.219732	1	106
GO:0016903	molecular_function	oxidoreductase activity, acting on the aldehyde or oxo group of donors	312/30771	405/40888	1.02366	0.219853	1	312
GO:0140014	biological_process	mitotic nuclear division	56/30771	70/40888	1.06303	0.219936	1	56
GO:0009628	biological_process	response to abiotic stimulus	3061/30771	4040/40888	1.00678	0.220091	1	3061
GO:0006790	biological_process	sulfur compound metabolic process	740/30771	969/40888	1.01476	0.220443	1	740
GO:0098657	biological_process	import into cell	296/30771	384/40888	1.02427	0.220654	1	296
GO:0004180	molecular_function	carboxypeptidase activity	96/30771	122/40888	1.0456	0.221412	1	96
GO:0008374	molecular_function	O-acyltransferase activity	132/30771	169/40888	1.03787	0.222197	1	132
GO:0010019	biological_process	chloroplast-nucleus signaling pathway	21/30771	25/40888	1.11618	0.222227	1	21
GO:0042335	biological_process	cuticle development	21/30771	25/40888	1.11618	0.222227	1	21
GO:0048235	biological_process	pollen sperm cell differentiation	21/30771	25/40888	1.11618	0.222227	1	21
GO:1903829	biological_process	positive regulation of cellular protein localization	21/30771	25/40888	1.11618	0.222227	1	21
GO:0034243	biological_process	regulation of transcription elongation from RNA polymerase II promoter	66/30771	83/40888	1.05662	0.222326	1	66
GO:0006352	biological_process	DNA-templated transcription, initiation	109/30771	139/40888	1.042	0.22376	1	109
GO:0004536	molecular_function	deoxyribonuclease activity	49/30771	61/40888	1.06738	0.223802	1	49
GO:0006301	biological_process	postreplication repair	49/30771	61/40888	1.06738	0.223802	1	49
GO:0010564	biological_process	regulation of cell cycle process	174/30771	224/40888	1.03218	0.223876	1	174
GO:0072503	biological_process	cellular divalent inorganic cation homeostasis	174/30771	224/40888	1.03218	0.223876	1	174
GO:0015085	molecular_function	calcium ion transmembrane transporter activity	254/30771	329/40888	1.02587	0.225752	1	254
GO:0048509	biological_process	regulation of meristem development	206/30771	266/40888	1.02906	0.22578	1	206
GO:0009409	biological_process	response to cold	595/30771	778/40888	1.01623	0.225968	1	595
GO:0009532	cellular_component	plastid stroma	1007/30771	1322/40888	1.01217	0.226722	1	1007
GO:0016108	biological_process	tetraterpenoid metabolic process	42/30771	52/40888	1.07325	0.22694	1	42
GO:0016116	biological_process	carotenoid metabolic process	42/30771	52/40888	1.07325	0.22694	1	42
GO:0016281	cellular_component	eukaryotic translation initiation factor 4F complex	42/30771	52/40888	1.07325	0.22694	1	42
GO:0046292	biological_process	formaldehyde metabolic process	42/30771	52/40888	1.07325	0.22694	1	42
GO:0048015	biological_process	phosphatidylinositol-mediated signaling	42/30771	52/40888	1.07325	0.22694	1	42
GO:0070646	biological_process	protein modification by small protein removal	193/30771	249/40888	1.02994	0.227403	1	193
GO:0009809	biological_process	lignin biosynthetic process	89/30771	113/40888	1.04656	0.227472	1	89
GO:0000055	biological_process	ribosomal large subunit export from nucleus	28/30771	34/40888	1.09429	0.22808	1	28
GO:0005687	cellular_component	U4 snRNP	28/30771	34/40888	1.09429	0.22808	1	28
GO:0006210	biological_process	thymine catabolic process	28/30771	34/40888	1.09429	0.22808	1	28
GO:0008295	biological_process	spermidine biosynthetic process	28/30771	34/40888	1.09429	0.22808	1	28
GO:0010540	biological_process	basipetal auxin transport	28/30771	34/40888	1.09429	0.22808	1	28
GO:0017157	biological_process	regulation of exocytosis	28/30771	34/40888	1.09429	0.22808	1	28
GO:0019859	biological_process	thymine metabolic process	28/30771	34/40888	1.09429	0.22808	1	28
GO:0051046	biological_process	regulation of secretion	28/30771	34/40888	1.09429	0.22808	1	28
GO:1903530	biological_process	regulation of secretion by cell	28/30771	34/40888	1.09429	0.22808	1	28
GO:0004033	molecular_function	aldo-keto reductase (NADP) activity	35/30771	43/40888	1.08157	0.228758	1	35
GO:0070063	molecular_function	RNA polymerase binding	35/30771	43/40888	1.08157	0.228758	1	35
GO:1902183	biological_process	regulation of shoot apical meristem development	35/30771	43/40888	1.08157	0.228758	1	35
GO:0090696	biological_process	post-embryonic plant organ development	228/30771	295/40888	1.02699	0.230061	1	228
GO:0009144	biological_process	purine nucleoside triphosphate metabolic process	102/30771	130/40888	1.04258	0.230084	1	102
GO:0009678	molecular_function	pyrophosphate hydrolysis-driven proton transmembrane transporter activity	336/30771	437/40888	1.02167	0.231334	1	336
GO:0005795	cellular_component	Golgi stack	282/30771	366/40888	1.02382	0.231863	1	282
GO:1905393	biological_process	plant organ formation	128/30771	164/40888	1.0371	0.231915	1	128
GO:0008194	molecular_function	UDP-glycosyltransferase activity	339/30771	441/40888	1.02145	0.232708	1	339
GO:0004084	molecular_function	branched-chain-amino-acid transaminase activity	17/30771	20/40888	1.12947	0.232979	1	17
GO:0005980	biological_process	glycogen catabolic process	17/30771	20/40888	1.12947	0.232979	1	17
GO:0009331	cellular_component	glycerol-3-phosphate dehydrogenase complex	17/30771	20/40888	1.12947	0.232979	1	17
GO:0009938	biological_process	negative regulation of gibberellic acid mediated signaling pathway	17/30771	20/40888	1.12947	0.232979	1	17
GO:0016973	biological_process	poly(A)+ mRNA export from nucleus	17/30771	20/40888	1.12947	0.232979	1	17
GO:0030100	biological_process	regulation of endocytosis	17/30771	20/40888	1.12947	0.232979	1	17
GO:0043066	biological_process	negative regulation of apoptotic process	17/30771	20/40888	1.12947	0.232979	1	17
GO:0043487	biological_process	regulation of RNA stability	17/30771	20/40888	1.12947	0.232979	1	17
GO:0048658	biological_process	anther wall tapetum development	17/30771	20/40888	1.12947	0.232979	1	17
GO:0052325	biological_process	cell wall pectin biosynthetic process	17/30771	20/40888	1.12947	0.232979	1	17
GO:0080144	biological_process	amino acid homeostasis	17/30771	20/40888	1.12947	0.232979	1	17
GO:0006305	biological_process	DNA alkylation	82/30771	104/40888	1.04769	0.233756	1	82
GO:0006306	biological_process	DNA methylation	82/30771	104/40888	1.04769	0.233756	1	82
GO:0022853	molecular_function	active ion transmembrane transporter activity	728/30771	954/40888	1.014	0.235109	1	728
GO:0016891	molecular_function	endoribonuclease activity, producing 5'-phosphomonoesters	45/30771	56/40888	1.06777	0.236591	1	45
GO:0007031	biological_process	peroxisome organization	108/30771	138/40888	1.03992	0.238169	1	108
GO:0080135	biological_process	regulation of cellular response to stress	121/30771	155/40888	1.03731	0.238663	1	121
GO:0031669	biological_process	cellular response to nutrient levels	278/30771	361/40888	1.02327	0.239375	1	278
GO:0001664	molecular_function	G protein-coupled receptor binding	38/30771	47/40888	1.07434	0.240223	1	38
GO:0005884	cellular_component	actin filament	38/30771	47/40888	1.07434	0.240223	1	38
GO:0007187	biological_process	G protein-coupled receptor signaling pathway, coupled to cyclic nucleotide second messenger	38/30771	47/40888	1.07434	0.240223	1	38
GO:0007188	biological_process	adenylate cyclase-modulating G protein-coupled receptor signaling pathway	38/30771	47/40888	1.07434	0.240223	1	38
GO:0031683	molecular_function	G-protein beta/gamma-subunit complex binding	38/30771	47/40888	1.07434	0.240223	1	38
GO:0034513	molecular_function	box H/ACA snoRNA binding	38/30771	47/40888	1.07434	0.240223	1	38
GO:0048449	biological_process	floral organ formation	38/30771	47/40888	1.07434	0.240223	1	38
GO:0055080	biological_process	cation homeostasis	461/30771	602/40888	1.01756	0.240291	1	461
GO:0009094	biological_process	L-phenylalanine biosynthetic process	24/30771	29/40888	1.09968	0.241292	1	24
GO:0009838	biological_process	abscission	24/30771	29/40888	1.09968	0.241292	1	24
GO:0022898	biological_process	regulation of transmembrane transporter activity	24/30771	29/40888	1.09968	0.241292	1	24
GO:0032412	biological_process	regulation of ion transmembrane transporter activity	24/30771	29/40888	1.09968	0.241292	1	24
GO:1901988	biological_process	negative regulation of cell cycle phase transition	24/30771	29/40888	1.09968	0.241292	1	24
GO:1901991	biological_process	negative regulation of mitotic cell cycle phase transition	24/30771	29/40888	1.09968	0.241292	1	24
GO:1902065	biological_process	response to L-glutamate	24/30771	29/40888	1.09968	0.241292	1	24
GO:1902223	biological_process	erythrose 4-phosphate/phosphoenolpyruvate family amino acid biosynthetic process	24/30771	29/40888	1.09968	0.241292	1	24
GO:0000025	biological_process	maltose catabolic process	5/30771	5/40888	1.32878	0.241376	1	5
GO:0001192	biological_process	maintenance of transcriptional fidelity during DNA-templated transcription elongation	5/30771	5/40888	1.32878	0.241376	1	5
GO:0001193	biological_process	maintenance of transcriptional fidelity during DNA-templated transcription elongation from RNA polymerase II promoter	5/30771	5/40888	1.32878	0.241376	1	5
GO:0004490	molecular_function	methylglutaconyl-CoA hydratase activity	5/30771	5/40888	1.32878	0.241376	1	5
GO:0004641	molecular_function	phosphoribosylformylglycinamidine cyclo-ligase activity	5/30771	5/40888	1.32878	0.241376	1	5
GO:0004648	molecular_function	O-phospho-L-serine:2-oxoglutarate aminotransferase activity	5/30771	5/40888	1.32878	0.241376	1	5
GO:0004663	molecular_function	Rab geranylgeranyltransferase activity	5/30771	5/40888	1.32878	0.241376	1	5
GO:0005432	molecular_function	calcium:sodium antiporter activity	5/30771	5/40888	1.32878	0.241376	1	5
GO:0005461	molecular_function	UDP-glucuronic acid transmembrane transporter activity	5/30771	5/40888	1.32878	0.241376	1	5
GO:0005462	molecular_function	UDP-N-acetylglucosamine transmembrane transporter activity	5/30771	5/40888	1.32878	0.241376	1	5
GO:0005880	cellular_component	nuclear microtubule	5/30771	5/40888	1.32878	0.241376	1	5
GO:0006264	biological_process	mitochondrial DNA replication	5/30771	5/40888	1.32878	0.241376	1	5
GO:0006296	biological_process	nucleotide-excision repair, DNA incision, 5'-to lesion	5/30771	5/40888	1.32878	0.241376	1	5
GO:0007000	biological_process	nucleolus organization	5/30771	5/40888	1.32878	0.241376	1	5
GO:0008157	molecular_function	protein phosphatase 1 binding	5/30771	5/40888	1.32878	0.241376	1	5
GO:0008275	cellular_component	gamma-tubulin small complex	5/30771	5/40888	1.32878	0.241376	1	5
GO:0008506	molecular_function	sucrose:proton symporter activity	5/30771	5/40888	1.32878	0.241376	1	5
GO:0008534	molecular_function	oxidized purine nucleobase lesion DNA N-glycosylase activity	5/30771	5/40888	1.32878	0.241376	1	5
GO:0008746	molecular_function	NAD(P)+ transhydrogenase activity	5/30771	5/40888	1.32878	0.241376	1	5
GO:0008864	molecular_function	formyltetrahydrofolate deformylase activity	5/30771	5/40888	1.32878	0.241376	1	5
GO:0009000	molecular_function	selenocysteine lyase activity	5/30771	5/40888	1.32878	0.241376	1	5
GO:0009669	molecular_function	sucrose:cation symporter activity	5/30771	5/40888	1.32878	0.241376	1	5
GO:0009904	biological_process	chloroplast accumulation movement	5/30771	5/40888	1.32878	0.241376	1	5
GO:0010076	biological_process	maintenance of floral meristem identity	5/30771	5/40888	1.32878	0.241376	1	5
GO:0010190	biological_process	cytochrome b6f complex assembly	5/30771	5/40888	1.32878	0.241376	1	5
GO:0010217	biological_process	cellular aluminum ion homeostasis	5/30771	5/40888	1.32878	0.241376	1	5
GO:0010295	molecular_function	(+)-abscisic acid 8'-hydroxylase activity	5/30771	5/40888	1.32878	0.241376	1	5
GO:0010297	molecular_function	heteropolysaccharide binding	5/30771	5/40888	1.32878	0.241376	1	5
GO:0010326	molecular_function	methionine-oxo-acid transaminase activity	5/30771	5/40888	1.32878	0.241376	1	5
GO:0010400	biological_process	rhamnogalacturonan I side chain metabolic process	5/30771	5/40888	1.32878	0.241376	1	5
GO:0010500	biological_process	transmitting tissue development	5/30771	5/40888	1.32878	0.241376	1	5
GO:0010520	biological_process	regulation of reciprocal meiotic recombination	5/30771	5/40888	1.32878	0.241376	1	5
GO:0010777	biological_process	meiotic mismatch repair involved in reciprocal meiotic recombination	5/30771	5/40888	1.32878	0.241376	1	5
GO:0010966	biological_process	regulation of phosphate transport	5/30771	5/40888	1.32878	0.241376	1	5
GO:0010968	biological_process	regulation of microtubule nucleation	5/30771	5/40888	1.32878	0.241376	1	5
GO:0015083	molecular_function	aluminum ion transmembrane transporter activity	5/30771	5/40888	1.32878	0.241376	1	5
GO:0015234	molecular_function	thiamine transmembrane transporter activity	5/30771	5/40888	1.32878	0.241376	1	5
GO:0015616	molecular_function	DNA translocase activity	5/30771	5/40888	1.32878	0.241376	1	5
GO:0015801	biological_process	aromatic amino acid transport	5/30771	5/40888	1.32878	0.241376	1	5
GO:0015810	biological_process	aspartate transmembrane transport	5/30771	5/40888	1.32878	0.241376	1	5
GO:0015827	biological_process	tryptophan transport	5/30771	5/40888	1.32878	0.241376	1	5
GO:0016107	biological_process	sesquiterpenoid catabolic process	5/30771	5/40888	1.32878	0.241376	1	5
GO:0016652	molecular_function	oxidoreductase activity, acting on NAD(P)H, NAD(P) as acceptor	5/30771	5/40888	1.32878	0.241376	1	5
GO:0016768	molecular_function	spermine synthase activity	5/30771	5/40888	1.32878	0.241376	1	5
GO:0017006	biological_process	protein-tetrapyrrole linkage	5/30771	5/40888	1.32878	0.241376	1	5
GO:0030836	biological_process	positive regulation of actin filament depolymerization	5/30771	5/40888	1.32878	0.241376	1	5
GO:0030974	biological_process	thiamine pyrophosphate transmembrane transport	5/30771	5/40888	1.32878	0.241376	1	5
GO:0031117	biological_process	positive regulation of microtubule depolymerization	5/30771	5/40888	1.32878	0.241376	1	5
GO:0032790	biological_process	ribosome disassembly	5/30771	5/40888	1.32878	0.241376	1	5
GO:0033075	biological_process	isoquinoline alkaloid biosynthetic process	5/30771	5/40888	1.32878	0.241376	1	5
GO:0033076	biological_process	isoquinoline alkaloid metabolic process	5/30771	5/40888	1.32878	0.241376	1	5
GO:0033385	biological_process	geranylgeranyl diphosphate metabolic process	5/30771	5/40888	1.32878	0.241376	1	5
GO:0033587	biological_process	shikimate biosynthetic process	5/30771	5/40888	1.32878	0.241376	1	5
GO:0042131	molecular_function	thiamine phosphate phosphatase activity	5/30771	5/40888	1.32878	0.241376	1	5
GO:0042353	biological_process	fucose biosynthetic process	5/30771	5/40888	1.32878	0.241376	1	5
GO:0042354	biological_process	L-fucose metabolic process	5/30771	5/40888	1.32878	0.241376	1	5
GO:0042780	biological_process	tRNA 3'-end processing	5/30771	5/40888	1.32878	0.241376	1	5
GO:0042800	molecular_function	histone methyltransferase activity (H3-K4 specific)	5/30771	5/40888	1.32878	0.241376	1	5
GO:0042807	cellular_component	central vacuole	5/30771	5/40888	1.32878	0.241376	1	5
GO:0043290	biological_process	apocarotenoid catabolic process	5/30771	5/40888	1.32878	0.241376	1	5
GO:0043495	molecular_function	protein membrane anchor	5/30771	5/40888	1.32878	0.241376	1	5
GO:0044325	molecular_function	ion channel binding	5/30771	5/40888	1.32878	0.241376	1	5
GO:0045117	biological_process	azole transport	5/30771	5/40888	1.32878	0.241376	1	5
GO:0045128	biological_process	negative regulation of reciprocal meiotic recombination	5/30771	5/40888	1.32878	0.241376	1	5
GO:0045298	cellular_component	tubulin complex	5/30771	5/40888	1.32878	0.241376	1	5
GO:0045827	biological_process	negative regulation of isoprenoid metabolic process	5/30771	5/40888	1.32878	0.241376	1	5
GO:0046345	biological_process	abscisic acid catabolic process	5/30771	5/40888	1.32878	0.241376	1	5
GO:0046622	biological_process	positive regulation of organ growth	5/30771	5/40888	1.32878	0.241376	1	5
GO:0050000	biological_process	chromosome localization	5/30771	5/40888	1.32878	0.241376	1	5
GO:0050513	molecular_function	glycoprotein 2-beta-D-xylosyltransferase activity	5/30771	5/40888	1.32878	0.241376	1	5
GO:0052318	biological_process	regulation of phytoalexin metabolic process	5/30771	5/40888	1.32878	0.241376	1	5
GO:0052319	biological_process	regulation of phytoalexin biosynthetic process	5/30771	5/40888	1.32878	0.241376	1	5
GO:0052320	biological_process	positive regulation of phytoalexin metabolic process	5/30771	5/40888	1.32878	0.241376	1	5
GO:0052322	biological_process	positive regulation of phytoalexin biosynthetic process	5/30771	5/40888	1.32878	0.241376	1	5
GO:0052895	molecular_function	N1-acetylspermine:oxygen oxidoreductase (N1-acetylspermidine-forming) activity	5/30771	5/40888	1.32878	0.241376	1	5
GO:0055079	biological_process	aluminum ion homeostasis	5/30771	5/40888	1.32878	0.241376	1	5
GO:0060631	biological_process	regulation of meiosis I	5/30771	5/40888	1.32878	0.241376	1	5
GO:0061912	biological_process	selective autophagy	5/30771	5/40888	1.32878	0.241376	1	5
GO:0080054	molecular_function	low-affinity nitrate transmembrane transporter activity	5/30771	5/40888	1.32878	0.241376	1	5
GO:0090063	biological_process	positive regulation of microtubule nucleation	5/30771	5/40888	1.32878	0.241376	1	5
GO:0090356	biological_process	negative regulation of auxin metabolic process	5/30771	5/40888	1.32878	0.241376	1	5
GO:0090395	cellular_component	plant cell papilla	5/30771	5/40888	1.32878	0.241376	1	5
GO:0090422	molecular_function	thiamine pyrophosphate transmembrane transporter activity	5/30771	5/40888	1.32878	0.241376	1	5
GO:0090447	molecular_function	glycerol-3-phosphate 2-O-acyltransferase activity	5/30771	5/40888	1.32878	0.241376	1	5
GO:0097298	biological_process	regulation of nucleus size	5/30771	5/40888	1.32878	0.241376	1	5
GO:0102033	molecular_function	fatty acid omega-hydroxylase activity	5/30771	5/40888	1.32878	0.241376	1	5
GO:0110029	biological_process	negative regulation of meiosis I	5/30771	5/40888	1.32878	0.241376	1	5
GO:1900030	biological_process	regulation of pectin biosynthetic process	5/30771	5/40888	1.32878	0.241376	1	5
GO:1901182	biological_process	regulation of camalexin biosynthetic process	5/30771	5/40888	1.32878	0.241376	1	5
GO:1901183	biological_process	positive regulation of camalexin biosynthetic process	5/30771	5/40888	1.32878	0.241376	1	5
GO:1901348	biological_process	positive regulation of secondary cell wall biogenesis	5/30771	5/40888	1.32878	0.241376	1	5
GO:1901535	biological_process	regulation of DNA demethylation	5/30771	5/40888	1.32878	0.241376	1	5
GO:1902171	biological_process	regulation of tocopherol cyclase activity	5/30771	5/40888	1.32878	0.241376	1	5
GO:1902602	biological_process	aluminum ion transmembrane transport	5/30771	5/40888	1.32878	0.241376	1	5
GO:1905898	biological_process	positive regulation of response to endoplasmic reticulum stress	5/30771	5/40888	1.32878	0.241376	1	5
GO:1990059	biological_process	fruit valve development	5/30771	5/40888	1.32878	0.241376	1	5
GO:1990415	cellular_component	Pex17p-Pex14p docking complex	5/30771	5/40888	1.32878	0.241376	1	5
GO:1990429	cellular_component	peroxisomal importomer complex	5/30771	5/40888	1.32878	0.241376	1	5
GO:1902903	biological_process	regulation of supramolecular fiber organization	137/30771	176/40888	1.03434	0.241596	1	137
GO:1902911	cellular_component	protein kinase complex	137/30771	176/40888	1.03434	0.241596	1	137
GO:0051052	biological_process	regulation of DNA metabolic process	124/30771	159/40888	1.03628	0.242116	1	124
GO:0004032	molecular_function	alditol:NADP+ 1-oxidoreductase activity	31/30771	38/40888	1.08401	0.242325	1	31
GO:0006449	biological_process	regulation of translational termination	31/30771	38/40888	1.08401	0.242325	1	31
GO:0016553	biological_process	base conversion or substitution editing	31/30771	38/40888	1.08401	0.242325	1	31
GO:0017000	biological_process	antibiotic biosynthetic process	31/30771	38/40888	1.08401	0.242325	1	31
GO:0034399	cellular_component	nuclear periphery	31/30771	38/40888	1.08401	0.242325	1	31
GO:0042973	molecular_function	glucan endo-1,3-beta-D-glucosidase activity	31/30771	38/40888	1.08401	0.242325	1	31
GO:0045901	biological_process	positive regulation of translational elongation	31/30771	38/40888	1.08401	0.242325	1	31
GO:0045905	biological_process	positive regulation of translational termination	31/30771	38/40888	1.08401	0.242325	1	31
GO:0004370	molecular_function	glycerol kinase activity	13/30771	15/40888	1.15161	0.243049	1	13
GO:0004821	molecular_function	histidine-tRNA ligase activity	13/30771	15/40888	1.15161	0.243049	1	13
GO:0006145	biological_process	purine nucleobase catabolic process	13/30771	15/40888	1.15161	0.243049	1	13
GO:0006427	biological_process	histidyl-tRNA aminoacylation	13/30771	15/40888	1.15161	0.243049	1	13
GO:0008720	molecular_function	D-lactate dehydrogenase activity	13/30771	15/40888	1.15161	0.243049	1	13
GO:0009547	cellular_component	plastid ribosome	13/30771	15/40888	1.15161	0.243049	1	13
GO:0015185	molecular_function	gamma-aminobutyric acid transmembrane transporter activity	13/30771	15/40888	1.15161	0.243049	1	13
GO:0015766	biological_process	disaccharide transport	13/30771	15/40888	1.15161	0.243049	1	13
GO:0015772	biological_process	oligosaccharide transport	13/30771	15/40888	1.15161	0.243049	1	13
GO:0015812	biological_process	gamma-aminobutyric acid transport	13/30771	15/40888	1.15161	0.243049	1	13
GO:0016444	biological_process	somatic cell DNA recombination	13/30771	15/40888	1.15161	0.243049	1	13
GO:0038199	molecular_function	ethylene receptor activity	13/30771	15/40888	1.15161	0.243049	1	13
GO:0043328	biological_process	protein transport to vacuole involved in ubiquitin-dependent protein catabolic process via the multivesicular body sorting pathway	13/30771	15/40888	1.15161	0.243049	1	13
GO:0044805	biological_process	late nucleophagy	13/30771	15/40888	1.15161	0.243049	1	13
GO:0046167	biological_process	glycerol-3-phosphate biosynthetic process	13/30771	15/40888	1.15161	0.243049	1	13
GO:0051740	molecular_function	ethylene binding	13/30771	15/40888	1.15161	0.243049	1	13
GO:0060148	biological_process	positive regulation of posttranscriptional gene silencing	13/30771	15/40888	1.15161	0.243049	1	13
GO:0060964	biological_process	regulation of gene silencing by miRNA	13/30771	15/40888	1.15161	0.243049	1	13
GO:0071586	biological_process	CAAX-box protein processing	13/30771	15/40888	1.15161	0.243049	1	13
GO:0072328	molecular_function	alkene binding	13/30771	15/40888	1.15161	0.243049	1	13
GO:0072531	biological_process	pyrimidine-containing compound transmembrane transport	13/30771	15/40888	1.15161	0.243049	1	13
GO:0080009	biological_process	mRNA methylation	13/30771	15/40888	1.15161	0.243049	1	13
GO:0080120	biological_process	CAAX-box protein maturation	13/30771	15/40888	1.15161	0.243049	1	13
GO:0090376	biological_process	seed trichome differentiation	13/30771	15/40888	1.15161	0.243049	1	13
GO:1900057	biological_process	positive regulation of leaf senescence	13/30771	15/40888	1.15161	0.243049	1	13
GO:1902326	biological_process	positive regulation of chlorophyll biosynthetic process	13/30771	15/40888	1.15161	0.243049	1	13
GO:1905623	biological_process	positive regulation of leaf development	13/30771	15/40888	1.15161	0.243049	1	13
GO:0045995	biological_process	regulation of embryonic development	88/30771	112/40888	1.04404	0.243585	1	88
GO:0098813	biological_process	nuclear chromosome segregation	88/30771	112/40888	1.04404	0.243585	1	88
GO:0046148	biological_process	pigment biosynthetic process	185/30771	239/40888	1.02856	0.244958	1	185
GO:0006304	biological_process	DNA modification	101/30771	129/40888	1.04037	0.245219	1	101
GO:0034728	biological_process	nucleosome organization	101/30771	129/40888	1.04037	0.245219	1	101
GO:0044728	biological_process	DNA methylation or demethylation	101/30771	129/40888	1.04037	0.245219	1	101
GO:0006835	biological_process	dicarboxylic acid transport	48/30771	60/40888	1.06303	0.245441	1	48
GO:0009522	cellular_component	photosystem I	48/30771	60/40888	1.06303	0.245441	1	48
GO:0016783	molecular_function	sulfurtransferase activity	48/30771	60/40888	1.06303	0.245441	1	48
GO:0005797	cellular_component	Golgi medial cisterna	78/30771	99/40888	1.04692	0.245666	1	78
GO:0033013	biological_process	tetrapyrrole metabolic process	114/30771	146/40888	1.03754	0.245733	1	114
GO:0006722	biological_process	triterpenoid metabolic process	58/30771	73/40888	1.05575	0.247197	1	58
GO:2001057	biological_process	reactive nitrogen species metabolic process	58/30771	73/40888	1.05575	0.247197	1	58
GO:0098660	biological_process	inorganic ion transmembrane transport	416/30771	543/40888	1.018	0.247634	1	416
GO:0010073	biological_process	meristem maintenance	223/30771	289/40888	1.02532	0.248588	1	223
GO:0061024	biological_process	membrane organization	419/30771	547/40888	1.01784	0.248751	1	419
GO:0019827	biological_process	stem cell population maintenance	117/30771	150/40888	1.03645	0.249336	1	117
GO:0098727	biological_process	maintenance of cell number	117/30771	150/40888	1.03645	0.249336	1	117
GO:0006979	biological_process	response to oxidative stress	738/30771	968/40888	1.01306	0.249452	1	738
GO:0000187	biological_process	activation of MAPK activity	9/30771	10/40888	1.19591	0.249825	1	9
GO:0000255	biological_process	allantoin metabolic process	9/30771	10/40888	1.19591	0.249825	1	9
GO:0003938	molecular_function	IMP dehydrogenase activity	9/30771	10/40888	1.19591	0.249825	1	9
GO:0004867	molecular_function	serine-type endopeptidase inhibitor activity	9/30771	10/40888	1.19591	0.249825	1	9
GO:0006177	biological_process	GMP biosynthetic process	9/30771	10/40888	1.19591	0.249825	1	9
GO:0006562	biological_process	proline catabolic process	9/30771	10/40888	1.19591	0.249825	1	9
GO:0006949	biological_process	syncytium formation	9/30771	10/40888	1.19591	0.249825	1	9
GO:0008430	molecular_function	selenium binding	9/30771	10/40888	1.19591	0.249825	1	9
GO:0009383	molecular_function	rRNA (cytosine-C5-)-methyltransferase activity	9/30771	10/40888	1.19591	0.249825	1	9
GO:0010133	biological_process	proline catabolic process to glutamate	9/30771	10/40888	1.19591	0.249825	1	9
GO:0010158	biological_process	abaxial cell fate specification	9/30771	10/40888	1.19591	0.249825	1	9
GO:0010581	biological_process	regulation of starch biosynthetic process	9/30771	10/40888	1.19591	0.249825	1	9
GO:0010921	biological_process	regulation of phosphatase activity	9/30771	10/40888	1.19591	0.249825	1	9
GO:0016237	biological_process	lysosomal microautophagy	9/30771	10/40888	1.19591	0.249825	1	9
GO:0016434	molecular_function	rRNA (cytosine) methyltransferase activity	9/30771	10/40888	1.19591	0.249825	1	9
GO:0018773	molecular_function	acetylpyruvate hydrolase activity	9/30771	10/40888	1.19591	0.249825	1	9
GO:0030544	molecular_function	Hsp70 protein binding	9/30771	10/40888	1.19591	0.249825	1	9
GO:0031588	cellular_component	nucleotide-activated protein kinase complex	9/30771	10/40888	1.19591	0.249825	1	9
GO:0034727	biological_process	piecemeal microautophagy of the nucleus	9/30771	10/40888	1.19591	0.249825	1	9
GO:0036092	biological_process	phosphatidylinositol-3-phosphate biosynthetic process	9/30771	10/40888	1.19591	0.249825	1	9
GO:0042938	biological_process	dipeptide transport	9/30771	10/40888	1.19591	0.249825	1	9
GO:0042939	biological_process	tripeptide transport	9/30771	10/40888	1.19591	0.249825	1	9
GO:0043406	biological_process	positive regulation of MAP kinase activity	9/30771	10/40888	1.19591	0.249825	1	9
GO:0043410	biological_process	positive regulation of MAPK cascade	9/30771	10/40888	1.19591	0.249825	1	9
GO:0043981	biological_process	histone H4-K5 acetylation	9/30771	10/40888	1.19591	0.249825	1	9
GO:0045596	biological_process	negative regulation of cell differentiation	9/30771	10/40888	1.19591	0.249825	1	9
GO:0046037	biological_process	GMP metabolic process	9/30771	10/40888	1.19591	0.249825	1	9
GO:0047621	molecular_function	acylpyruvate hydrolase activity	9/30771	10/40888	1.19591	0.249825	1	9
GO:0048451	biological_process	petal formation	9/30771	10/40888	1.19591	0.249825	1	9
GO:0048759	biological_process	xylem vessel member cell differentiation	9/30771	10/40888	1.19591	0.249825	1	9
GO:0051055	biological_process	negative regulation of lipid biosynthetic process	9/30771	10/40888	1.19591	0.249825	1	9
GO:0051569	biological_process	regulation of histone H3-K4 methylation	9/30771	10/40888	1.19591	0.249825	1	9
GO:1901562	biological_process	response to paraquat	9/30771	10/40888	1.19591	0.249825	1	9
GO:0006284	biological_process	base-excision repair	41/30771	51/40888	1.06824	0.250545	1	41
GO:0048527	biological_process	lateral root development	146/30771	188/40888	1.03193	0.250553	1	146
GO:0046112	biological_process	nucleobase biosynthetic process	71/30771	90/40888	1.04826	0.252851	1	71
GO:0000819	biological_process	sister chromatid segregation	51/30771	64/40888	1.05887	0.253595	1	51
GO:0005977	biological_process	glycogen metabolic process	51/30771	64/40888	1.05887	0.253595	1	51
GO:0006112	biological_process	energy reserve metabolic process	51/30771	64/40888	1.05887	0.253595	1	51
GO:0010229	biological_process	inflorescence development	51/30771	64/40888	1.05887	0.253595	1	51
GO:0009740	biological_process	gibberellic acid mediated signaling pathway	61/30771	77/40888	1.05267	0.25398	1	61
GO:0051017	biological_process	actin filament bundle assembly	61/30771	77/40888	1.05267	0.25398	1	61
GO:0061572	biological_process	actin filament bundle organization	61/30771	77/40888	1.05267	0.25398	1	61
GO:0009308	biological_process	amine metabolic process	181/30771	234/40888	1.02782	0.254245	1	181
GO:0008106	molecular_function	alcohol dehydrogenase (NADP+) activity	34/30771	42/40888	1.07568	0.254807	1	34
GO:0009593	biological_process	detection of chemical stimulus	34/30771	42/40888	1.07568	0.254807	1	34
GO:0016109	biological_process	tetraterpenoid biosynthetic process	34/30771	42/40888	1.07568	0.254807	1	34
GO:0016117	biological_process	carotenoid biosynthetic process	34/30771	42/40888	1.07568	0.254807	1	34
GO:0019405	biological_process	alditol catabolic process	34/30771	42/40888	1.07568	0.254807	1	34
GO:0019563	biological_process	glycerol catabolic process	34/30771	42/40888	1.07568	0.254807	1	34
GO:0071230	biological_process	cellular response to amino acid stimulus	34/30771	42/40888	1.07568	0.254807	1	34
GO:0009932	biological_process	cell tip growth	270/30771	351/40888	1.02214	0.255074	1	270
GO:0070647	biological_process	protein modification by small protein conjugation or removal	1054/30771	1386/40888	1.01049	0.255144	1	1054
GO:0005677	cellular_component	chromatin silencing complex	20/30771	24/40888	1.10732	0.255696	1	20
GO:0006842	biological_process	tricarboxylic acid transport	20/30771	24/40888	1.10732	0.255696	1	20
GO:0007135	biological_process	meiosis II	20/30771	24/40888	1.10732	0.255696	1	20
GO:0009113	biological_process	purine nucleobase biosynthetic process	20/30771	24/40888	1.10732	0.255696	1	20
GO:0009900	biological_process	dehiscence	20/30771	24/40888	1.10732	0.255696	1	20
GO:0031080	cellular_component	nuclear pore outer ring	20/30771	24/40888	1.10732	0.255696	1	20
GO:0045144	biological_process	meiotic sister chromatid segregation	20/30771	24/40888	1.10732	0.255696	1	20
GO:0051177	biological_process	meiotic sister chromatid cohesion	20/30771	24/40888	1.10732	0.255696	1	20
GO:0061983	biological_process	meiosis II cell cycle process	20/30771	24/40888	1.10732	0.255696	1	20
GO:0062014	biological_process	negative regulation of small molecule metabolic process	20/30771	24/40888	1.10732	0.255696	1	20
GO:0090568	cellular_component	nuclear transcriptional repressor complex	20/30771	24/40888	1.10732	0.255696	1	20
GO:0003006	biological_process	developmental process involved in reproduction	1916/30771	2527/40888	1.0075	0.256909	1	1916
GO:0004520	molecular_function	endodeoxyribonuclease activity	27/30771	33/40888	1.08719	0.257282	1	27
GO:0005544	molecular_function	calcium-dependent phospholipid binding	27/30771	33/40888	1.08719	0.257282	1	27
GO:0006771	biological_process	riboflavin metabolic process	27/30771	33/40888	1.08719	0.257282	1	27
GO:0006836	biological_process	neurotransmitter transport	27/30771	33/40888	1.08719	0.257282	1	27
GO:0009231	biological_process	riboflavin biosynthetic process	27/30771	33/40888	1.08719	0.257282	1	27
GO:0015175	molecular_function	neutral amino acid transmembrane transporter activity	27/30771	33/40888	1.08719	0.257282	1	27
GO:0042727	biological_process	flavin-containing compound biosynthetic process	27/30771	33/40888	1.08719	0.257282	1	27
GO:0051307	biological_process	meiotic chromosome separation	27/30771	33/40888	1.08719	0.257282	1	27
GO:0006413	biological_process	translational initiation	219/30771	284/40888	1.02466	0.257299	1	219
GO:0045944	biological_process	positive regulation of transcription by RNA polymerase II	203/30771	263/40888	1.02564	0.258209	1	203
GO:0051788	biological_process	response to misfolded protein	74/30771	94/40888	1.04606	0.258381	1	74
GO:0009615	biological_process	response to virus	187/30771	242/40888	1.02679	0.258838	1	187
GO:0006714	biological_process	sesquiterpenoid metabolic process	44/30771	55/40888	1.06303	0.259904	1	44
GO:0019005	cellular_component	SCF ubiquitin ligase complex	44/30771	55/40888	1.06303	0.259904	1	44
GO:0008652	biological_process	cellular amino acid biosynthetic process	624/30771	818/40888	1.01364	0.260222	1	624
GO:0010256	biological_process	endomembrane system organization	206/30771	267/40888	1.0252	0.260284	1	206
GO:0004185	molecular_function	serine-type carboxypeptidase activity	87/30771	111/40888	1.04148	0.260409	1	87
GO:0009126	biological_process	purine nucleoside monophosphate metabolic process	87/30771	111/40888	1.04148	0.260409	1	87
GO:0009167	biological_process	purine ribonucleoside monophosphate metabolic process	87/30771	111/40888	1.04148	0.260409	1	87
GO:0019787	molecular_function	ubiquitin-like protein transferase activity	574/30771	752/40888	1.01426	0.260598	1	574
GO:0006040	biological_process	amino sugar metabolic process	54/30771	68/40888	1.05521	0.261142	1	54
GO:0017025	molecular_function	TBP-class protein binding	54/30771	68/40888	1.05521	0.261142	1	54
GO:0048471	cellular_component	perinuclear region of cytoplasm	158/30771	204/40888	1.02916	0.261522	1	158
GO:0051302	biological_process	regulation of cell division	158/30771	204/40888	1.02916	0.261522	1	158
GO:0005576	cellular_component	extracellular region	1495/30771	1970/40888	1.00839	0.262186	1	1495
GO:0006633	biological_process	fatty acid biosynthetic process	411/30771	537/40888	1.017	0.262252	1	411
GO:0035966	biological_process	response to topologically incorrect protein	392/30771	512/40888	1.01735	0.263573	1	392
GO:0031225	cellular_component	anchored component of membrane	161/30771	208/40888	1.02853	0.264109	1	161
GO:0000145	cellular_component	exocyst	37/30771	46/40888	1.0688	0.265867	1	37
GO:0000421	cellular_component	autophagosome membrane	37/30771	46/40888	1.0688	0.265867	1	37
GO:0010082	biological_process	regulation of root meristem growth	37/30771	46/40888	1.0688	0.265867	1	37
GO:0016872	molecular_function	intramolecular lyase activity	37/30771	46/40888	1.0688	0.265867	1	37
GO:0043562	biological_process	cellular response to nitrogen levels	67/30771	85/40888	1.04739	0.266334	1	67
GO:1901682	molecular_function	sulfur compound transmembrane transporter activity	67/30771	85/40888	1.04739	0.266334	1	67
GO:0019900	molecular_function	kinase binding	313/30771	408/40888	1.01939	0.2667	1	313
GO:0048608	biological_process	reproductive structure development	1605/30771	2116/40888	1.00789	0.267025	1	1605
GO:0061458	biological_process	reproductive system development	1605/30771	2116/40888	1.00789	0.267025	1	1605
GO:0055065	biological_process	metal ion homeostasis	379/30771	495/40888	1.01739	0.267218	1	379
GO:0006536	biological_process	glutamate metabolic process	119/30771	153/40888	1.0335	0.267499	1	119
GO:0016592	cellular_component	mediator complex	57/30771	72/40888	1.05195	0.268157	1	57
GO:0070592	biological_process	cell wall polysaccharide biosynthetic process	57/30771	72/40888	1.05195	0.268157	1	57
GO:2000377	biological_process	regulation of reactive oxygen species metabolic process	57/30771	72/40888	1.05195	0.268157	1	57
GO:0006568	biological_process	tryptophan metabolic process	47/30771	59/40888	1.05852	0.268444	1	47
GO:0006586	biological_process	indolalkylamine metabolic process	47/30771	59/40888	1.05852	0.268444	1	47
GO:0051050	biological_process	positive regulation of transport	47/30771	59/40888	1.05852	0.268444	1	47
GO:0042180	biological_process	cellular ketone metabolic process	93/30771	119/40888	1.03846	0.269209	1	93
GO:0071900	biological_process	regulation of protein serine/threonine kinase activity	93/30771	119/40888	1.03846	0.269209	1	93
GO:0019898	cellular_component	extrinsic component of membrane	151/30771	195/40888	1.02896	0.269281	1	151
GO:0048046	cellular_component	apoplast	457/30771	598/40888	1.01548	0.270193	1	457
GO:0000815	cellular_component	ESCRT III complex	30/30771	37/40888	1.07739	0.270953	1	30
GO:0004568	molecular_function	chitinase activity	30/30771	37/40888	1.07739	0.270953	1	30
GO:0010271	biological_process	regulation of chlorophyll catabolic process	30/30771	37/40888	1.07739	0.270953	1	30
GO:0080190	biological_process	lateral growth	30/30771	37/40888	1.07739	0.270953	1	30
GO:1901404	biological_process	regulation of tetrapyrrole catabolic process	30/30771	37/40888	1.07739	0.270953	1	30
GO:1905268	biological_process	negative regulation of chromatin organization	30/30771	37/40888	1.07739	0.270953	1	30
GO:0001046	molecular_function	core promoter sequence-specific DNA binding	16/30771	19/40888	1.11898	0.271433	1	16
GO:0001047	molecular_function	core promoter binding	16/30771	19/40888	1.11898	0.271433	1	16
GO:0004866	molecular_function	endopeptidase inhibitor activity	16/30771	19/40888	1.11898	0.271433	1	16
GO:0008453	molecular_function	alanine-glyoxylate transaminase activity	16/30771	19/40888	1.11898	0.271433	1	16
GO:0009249	biological_process	protein lipoylation	16/30771	19/40888	1.11898	0.271433	1	16
GO:0010272	biological_process	response to silver ion	16/30771	19/40888	1.11898	0.271433	1	16
GO:0010290	molecular_function	chlorophyll catabolite transmembrane transporter activity	16/30771	19/40888	1.11898	0.271433	1	16
GO:0015431	molecular_function	ATPase-coupled glutathione S-conjugate transmembrane transporter activity	16/30771	19/40888	1.11898	0.271433	1	16
GO:0016560	biological_process	protein import into peroxisome matrix, docking	16/30771	19/40888	1.11898	0.271433	1	16
GO:0019243	biological_process	methylglyoxal catabolic process to D-lactate via S-lactoyl-glutathione	16/30771	19/40888	1.11898	0.271433	1	16
GO:0032440	molecular_function	2-alkenal reductase [NAD(P)] activity	16/30771	19/40888	1.11898	0.271433	1	16
GO:0035970	biological_process	peptidyl-threonine dephosphorylation	16/30771	19/40888	1.11898	0.271433	1	16
GO:0042350	biological_process	GDP-L-fucose biosynthetic process	16/30771	19/40888	1.11898	0.271433	1	16
GO:0042946	biological_process	glucoside transport	16/30771	19/40888	1.11898	0.271433	1	16
GO:0042947	molecular_function	glucoside transmembrane transporter activity	16/30771	19/40888	1.11898	0.271433	1	16
GO:0043335	biological_process	protein unfolding	16/30771	19/40888	1.11898	0.271433	1	16
GO:0046368	biological_process	GDP-L-fucose metabolic process	16/30771	19/40888	1.11898	0.271433	1	16
GO:0048859	biological_process	formation of anatomical boundary	16/30771	19/40888	1.11898	0.271433	1	16
GO:0061727	biological_process	methylglyoxal catabolic process to lactate	16/30771	19/40888	1.11898	0.271433	1	16
GO:0071217	biological_process	cellular response to external biotic stimulus	16/30771	19/40888	1.11898	0.271433	1	16
GO:0080186	biological_process	developmental vegetative growth	16/30771	19/40888	1.11898	0.271433	1	16
GO:0090691	biological_process	formation of plant organ boundary	16/30771	19/40888	1.11898	0.271433	1	16
GO:1902417	molecular_function	(+)-abscisic acid D-glucopyranosyl ester transmembrane transporter activity	16/30771	19/40888	1.11898	0.271433	1	16
GO:1902418	biological_process	(+)-abscisic acid D-glucopyranosyl ester transmembrane transport	16/30771	19/40888	1.11898	0.271433	1	16
GO:0048878	biological_process	chemical homeostasis	725/30771	952/40888	1.01194	0.271486	1	725
GO:0008154	biological_process	actin polymerization or depolymerization	70/30771	89/40888	1.04511	0.271985	1	70
GO:0009888	biological_process	tissue development	945/30771	1243/40888	1.01022	0.273832	1	945
GO:0000340	molecular_function	RNA 7-methylguanosine cap binding	23/30771	28/40888	1.0915	0.27394	1	23
GO:0005749	cellular_component	mitochondrial respiratory chain complex II, succinate dehydrogenase complex (ubiquinone)	23/30771	28/40888	1.0915	0.27394	1	23
GO:0045257	cellular_component	succinate dehydrogenase complex (ubiquinone)	23/30771	28/40888	1.0915	0.27394	1	23
GO:0045283	cellular_component	fumarate reductase complex	23/30771	28/40888	1.0915	0.27394	1	23
GO:0051019	molecular_function	mitogen-activated protein kinase binding	23/30771	28/40888	1.0915	0.27394	1	23
GO:0007032	biological_process	endosome organization	60/30771	76/40888	1.04904	0.2747	1	60
GO:0042737	biological_process	drug catabolic process	353/30771	461/40888	1.01749	0.274779	1	353
GO:0051028	biological_process	mRNA transport	211/30771	274/40888	1.02326	0.275608	1	211
GO:0044703	biological_process	multi-organism reproductive process	230/30771	299/40888	1.02214	0.275702	1	230
GO:0070971	cellular_component	endoplasmic reticulum exit site	40/30771	50/40888	1.06303	0.275761	1	40
GO:0072529	biological_process	pyrimidine-containing compound catabolic process	40/30771	50/40888	1.06303	0.275761	1	40
GO:0010208	biological_process	pollen wall assembly	50/30771	63/40888	1.05459	0.276281	1	50
GO:0042126	biological_process	nitrate metabolic process	50/30771	63/40888	1.05459	0.276281	1	50
GO:0042128	biological_process	nitrate assimilation	50/30771	63/40888	1.05459	0.276281	1	50
GO:0098805	cellular_component	whole membrane	2360/30771	3117/40888	1.00607	0.277053	1	2360
GO:0010087	biological_process	phloem or xylem histogenesis	128/30771	165/40888	1.03081	0.277128	1	128
GO:0098662	biological_process	inorganic cation transmembrane transport	359/30771	469/40888	1.01713	0.277238	1	359
GO:0009127	biological_process	purine nucleoside monophosphate biosynthetic process	86/30771	110/40888	1.03887	0.277933	1	86
GO:0009168	biological_process	purine ribonucleoside monophosphate biosynthetic process	86/30771	110/40888	1.03887	0.277933	1	86
GO:0017001	biological_process	antibiotic catabolic process	179/30771	232/40888	1.02523	0.278495	1	179
GO:0070887	biological_process	cellular response to chemical stimulus	2227/30771	2941/40888	1.00619	0.27985	1	2227
GO:0004843	molecular_function	thiol-dependent ubiquitin-specific protease activity	131/30771	169/40888	1.03	0.280152	1	131
GO:0036459	molecular_function	thiol-dependent ubiquitinyl hydrolase activity	131/30771	169/40888	1.03	0.280152	1	131
GO:0010075	biological_process	regulation of meristem growth	63/30771	80/40888	1.04642	0.280823	1	63
GO:0045132	biological_process	meiotic chromosome segregation	63/30771	80/40888	1.04642	0.280823	1	63
GO:0006357	biological_process	regulation of transcription by RNA polymerase II	465/30771	609/40888	1.01459	0.280912	1	465
GO:0009657	biological_process	plastid organization	280/30771	365/40888	1.01934	0.28107	1	280
GO:0051495	biological_process	positive regulation of cytoskeleton organization	76/30771	97/40888	1.04111	0.282392	1	76
GO:1902905	biological_process	positive regulation of supramolecular fiber organization	76/30771	97/40888	1.04111	0.282392	1	76
GO:0000993	molecular_function	RNA polymerase II complex binding	33/30771	41/40888	1.06951	0.282828	1	33
GO:0010965	biological_process	regulation of mitotic sister chromatid separation	33/30771	41/40888	1.06951	0.282828	1	33
GO:0042548	biological_process	regulation of photosynthesis, light reaction	33/30771	41/40888	1.06951	0.282828	1	33
GO:0043175	molecular_function	RNA polymerase core enzyme binding	33/30771	41/40888	1.06951	0.282828	1	33
GO:1905818	biological_process	regulation of chromosome separation	33/30771	41/40888	1.06951	0.282828	1	33
GO:0009635	biological_process	response to herbicide	53/30771	67/40888	1.05113	0.28351	1	53
GO:0009863	biological_process	salicylic acid mediated signaling pathway	53/30771	67/40888	1.05113	0.28351	1	53
GO:0070816	biological_process	phosphorylation of RNA polymerase II C-terminal domain	53/30771	67/40888	1.05113	0.28351	1	53
GO:0004888	molecular_function	transmembrane signaling receptor activity	169/30771	219/40888	1.02541	0.2843	1	169
GO:0006779	biological_process	porphyrin-containing compound biosynthetic process	92/30771	118/40888	1.036	0.286436	1	92
GO:0006414	biological_process	translational elongation	172/30771	223/40888	1.02489	0.286612	1	172
GO:0004325	molecular_function	ferrochelatase activity	12/30771	14/40888	1.13896	0.28855	1	12
GO:0004869	molecular_function	cysteine-type endopeptidase inhibitor activity	12/30771	14/40888	1.13896	0.28855	1	12
GO:0006007	biological_process	glucose catabolic process	12/30771	14/40888	1.13896	0.28855	1	12
GO:0006212	biological_process	uracil catabolic process	12/30771	14/40888	1.13896	0.28855	1	12
GO:0008446	molecular_function	GDP-mannose 4,6-dehydratase activity	12/30771	14/40888	1.13896	0.28855	1	12
GO:0009840	cellular_component	chloroplastic endopeptidase Clp complex	12/30771	14/40888	1.13896	0.28855	1	12
GO:0010207	biological_process	photosystem II assembly	12/30771	14/40888	1.13896	0.28855	1	12
GO:0015770	biological_process	sucrose transport	12/30771	14/40888	1.13896	0.28855	1	12
GO:0016122	biological_process	xanthophyll metabolic process	12/30771	14/40888	1.13896	0.28855	1	12
GO:0016906	molecular_function	sterol 3-beta-glucosyltransferase activity	12/30771	14/40888	1.13896	0.28855	1	12
GO:0019482	biological_process	beta-alanine metabolic process	12/30771	14/40888	1.13896	0.28855	1	12
GO:0019483	biological_process	beta-alanine biosynthetic process	12/30771	14/40888	1.13896	0.28855	1	12
GO:0034058	biological_process	endosomal vesicle fusion	12/30771	14/40888	1.13896	0.28855	1	12
GO:0102202	molecular_function	soladodine glucosyltransferase activity	12/30771	14/40888	1.13896	0.28855	1	12
GO:0102203	molecular_function	brassicasterol glucosyltransferase activity	12/30771	14/40888	1.13896	0.28855	1	12
GO:0102205	molecular_function	cholesterol allpha-glucosyltransferase activity	12/30771	14/40888	1.13896	0.28855	1	12
GO:1900056	biological_process	negative regulation of leaf senescence	12/30771	14/40888	1.13896	0.28855	1	12
GO:1905622	biological_process	negative regulation of leaf development	12/30771	14/40888	1.13896	0.28855	1	12
GO:0030133	cellular_component	transport vesicle	175/30771	227/40888	1.02439	0.288876	1	175
GO:0004124	molecular_function	cysteine synthase activity	26/30771	32/40888	1.07964	0.28903	1	26
GO:0005669	cellular_component	transcription factor TFIID complex	26/30771	32/40888	1.07964	0.28903	1	26
GO:0010363	biological_process	regulation of plant-type hypersensitive response	26/30771	32/40888	1.07964	0.28903	1	26
GO:0072659	biological_process	protein localization to plasma membrane	26/30771	32/40888	1.07964	0.28903	1	26
GO:0016104	biological_process	triterpenoid biosynthetic process	56/30771	71/40888	1.04805	0.290207	1	56
GO:0009642	biological_process	response to light intensity	159/30771	206/40888	1.02561	0.290341	1	159
GO:0015698	biological_process	inorganic anion transport	159/30771	206/40888	1.02561	0.290341	1	159
GO:0090567	biological_process	reproductive shoot system development	635/30771	834/40888	1.01172	0.290656	1	635
GO:0030120	cellular_component	vesicle coat	216/30771	281/40888	1.02141	0.290904	1	216
GO:0015994	biological_process	chlorophyll metabolic process	82/30771	105/40888	1.03772	0.291777	1	82
GO:0022836	molecular_function	gated channel activity	127/30771	164/40888	1.029	0.292001	1	127
GO:0000910	biological_process	cytokinesis	162/30771	210/40888	1.02506	0.292746	1	162
GO:0005850	cellular_component	eukaryotic translation initiation factor 2 complex	19/30771	23/40888	1.09769	0.292758	1	19
GO:0006522	biological_process	alanine metabolic process	19/30771	23/40888	1.09769	0.292758	1	19
GO:0009078	biological_process	pyruvate family amino acid metabolic process	19/30771	23/40888	1.09769	0.292758	1	19
GO:0010970	biological_process	transport along microtubule	19/30771	23/40888	1.09769	0.292758	1	19
GO:0015108	molecular_function	chloride transmembrane transporter activity	19/30771	23/40888	1.09769	0.292758	1	19
GO:0015696	biological_process	ammonium transport	19/30771	23/40888	1.09769	0.292758	1	19
GO:0033169	biological_process	histone H3-K9 demethylation	19/30771	23/40888	1.09769	0.292758	1	19
GO:0046398	biological_process	UDP-glucuronate metabolic process	19/30771	23/40888	1.09769	0.292758	1	19
GO:0060628	biological_process	regulation of ER to Golgi vesicle-mediated transport	19/30771	23/40888	1.09769	0.292758	1	19
GO:0061135	molecular_function	endopeptidase regulator activity	19/30771	23/40888	1.09769	0.292758	1	19
GO:0099111	biological_process	microtubule-based transport	19/30771	23/40888	1.09769	0.292758	1	19
GO:0003714	molecular_function	transcription corepressor activity	46/30771	58/40888	1.05386	0.292795	1	46
GO:0019372	biological_process	lipoxygenase pathway	46/30771	58/40888	1.05386	0.292795	1	46
GO:0043467	biological_process	regulation of generation of precursor metabolites and energy	46/30771	58/40888	1.05386	0.292795	1	46
GO:0006734	biological_process	NADH metabolic process	36/30771	45/40888	1.06303	0.293275	1	36
GO:1900376	biological_process	regulation of secondary metabolite biosynthetic process	36/30771	45/40888	1.06303	0.293275	1	36
GO:0048438	biological_process	floral whorl development	241/30771	314/40888	1.01986	0.293624	1	241
GO:0098655	biological_process	cation transmembrane transport	379/30771	496/40888	1.01534	0.294243	1	379
GO:0045259	cellular_component	proton-transporting ATP synthase complex	98/30771	126/40888	1.0335	0.294252	1	98
GO:0000956	biological_process	nuclear-transcribed mRNA catabolic process	222/30771	289/40888	1.02073	0.294535	1	222
GO:0044248	biological_process	cellular catabolic process	2815/30771	3722/40888	1.00498	0.296816	1	2815
GO:0098796	cellular_component	membrane protein complex	1410/30771	1860/40888	1.0073	0.297448	1	1410
GO:0004722	molecular_function	protein serine/threonine phosphatase activity	133/30771	172/40888	1.02749	0.297774	1	133
GO:0071241	biological_process	cellular response to inorganic substance	101/30771	130/40888	1.03236	0.297931	1	101
GO:0048609	biological_process	multicellular organismal reproductive process	209/30771	272/40888	1.02101	0.298948	1	209
GO:0030132	cellular_component	clathrin coat of coated pit	49/30771	62/40888	1.05017	0.300208	1	49
GO:0015171	molecular_function	amino acid transmembrane transporter activity	88/30771	113/40888	1.0348	0.300303	1	88
GO:0034605	biological_process	cellular response to heat	212/30771	276/40888	1.02066	0.300794	1	212
GO:0070588	biological_process	calcium ion transmembrane transport	120/30771	155/40888	1.02874	0.301401	1	120
GO:0019901	molecular_function	protein kinase binding	234/30771	305/40888	1.01946	0.301453	1	234
GO:0051130	biological_process	positive regulation of cellular component organization	234/30771	305/40888	1.01946	0.301453	1	234
GO:0005732	cellular_component	small nucleolar ribonucleoprotein complex	104/30771	134/40888	1.03129	0.301471	1	104
GO:0045859	biological_process	regulation of protein kinase activity	104/30771	134/40888	1.03129	0.301471	1	104
GO:0008066	molecular_function	glutamate receptor activity	29/30771	36/40888	1.07041	0.301798	1	29
GO:0042726	biological_process	flavin-containing compound metabolic process	29/30771	36/40888	1.07041	0.301798	1	29
GO:0080117	biological_process	secondary growth	29/30771	36/40888	1.07041	0.301798	1	29
GO:2000022	biological_process	regulation of jasmonic acid mediated signaling pathway	29/30771	36/40888	1.07041	0.301798	1	29
GO:0051181	biological_process	cofactor transport	62/30771	79/40888	1.04284	0.302253	1	62
GO:0071446	biological_process	cellular response to salicylic acid stimulus	62/30771	79/40888	1.04284	0.302253	1	62
GO:0016614	molecular_function	oxidoreductase activity, acting on CH-OH group of donors	655/30771	861/40888	1.01086	0.302502	1	655
GO:0009098	biological_process	leucine biosynthetic process	39/30771	49/40888	1.0576	0.302568	1	39
GO:0031418	molecular_function	L-ascorbic acid binding	39/30771	49/40888	1.0576	0.302568	1	39
GO:0010008	cellular_component	endosome membrane	484/30771	635/40888	1.01281	0.303188	1	484
GO:0005778	cellular_component	peroxisomal membrane	91/30771	117/40888	1.0335	0.304286	1	91
GO:0031903	cellular_component	microbody membrane	91/30771	117/40888	1.0335	0.304286	1	91
GO:0045165	biological_process	cell fate commitment	91/30771	117/40888	1.0335	0.304286	1	91
GO:0022603	biological_process	regulation of anatomical structure morphogenesis	284/30771	371/40888	1.01718	0.304338	1	284
GO:0043085	biological_process	positive regulation of catalytic activity	107/30771	138/40888	1.03029	0.304881	1	107
GO:0009606	biological_process	tropism	142/30771	184/40888	1.02547	0.30584	1	142
GO:0045787	biological_process	positive regulation of cell cycle	78/30771	100/40888	1.03645	0.306507	1	78
GO:0004160	molecular_function	dihydroxy-acid dehydratase activity	8/30771	9/40888	1.18114	0.306522	1	8
GO:0004419	molecular_function	hydroxymethylglutaryl-CoA lyase activity	8/30771	9/40888	1.18114	0.306522	1	8
GO:0004661	molecular_function	protein geranylgeranyltransferase activity	8/30771	9/40888	1.18114	0.306522	1	8
GO:0005290	molecular_function	L-histidine transmembrane transporter activity	8/30771	9/40888	1.18114	0.306522	1	8
GO:0005366	molecular_function	myo-inositol:proton symporter activity	8/30771	9/40888	1.18114	0.306522	1	8
GO:0005828	cellular_component	kinetochore microtubule	8/30771	9/40888	1.18114	0.306522	1	8
GO:0006998	biological_process	nuclear envelope organization	8/30771	9/40888	1.18114	0.306522	1	8
GO:0008661	molecular_function	1-deoxy-D-xylulose-5-phosphate synthase activity	8/30771	9/40888	1.18114	0.306522	1	8
GO:0009643	biological_process	photosynthetic acclimation	8/30771	9/40888	1.18114	0.306522	1	8
GO:0010113	biological_process	negative regulation of systemic acquired resistance	8/30771	9/40888	1.18114	0.306522	1	8
GO:0015173	molecular_function	aromatic amino acid transmembrane transporter activity	8/30771	9/40888	1.18114	0.306522	1	8
GO:0016233	biological_process	telomere capping	8/30771	9/40888	1.18114	0.306522	1	8
GO:0030942	molecular_function	endoplasmic reticulum signal peptide binding	8/30771	9/40888	1.18114	0.306522	1	8
GO:0031379	cellular_component	RNA-directed RNA polymerase complex	8/30771	9/40888	1.18114	0.306522	1	8
GO:0031380	cellular_component	nuclear RNA-directed RNA polymerase complex	8/30771	9/40888	1.18114	0.306522	1	8
GO:0034053	biological_process	modulation by symbiont of host defense-related programmed cell death	8/30771	9/40888	1.18114	0.306522	1	8
GO:0034263	biological_process	positive regulation of autophagy in response to ER overload	8/30771	9/40888	1.18114	0.306522	1	8
GO:0042149	biological_process	cellular response to glucose starvation	8/30771	9/40888	1.18114	0.306522	1	8
GO:0042389	molecular_function	omega-3 fatty acid desaturase activity	8/30771	9/40888	1.18114	0.306522	1	8
GO:0043666	biological_process	regulation of phosphoprotein phosphatase activity	8/30771	9/40888	1.18114	0.306522	1	8
GO:0044068	biological_process	modulation by symbiont of host cellular process	8/30771	9/40888	1.18114	0.306522	1	8
GO:0045335	cellular_component	phagocytic vesicle	8/30771	9/40888	1.18114	0.306522	1	8
GO:0046505	biological_process	sulfolipid metabolic process	8/30771	9/40888	1.18114	0.306522	1	8
GO:0046506	biological_process	sulfolipid biosynthetic process	8/30771	9/40888	1.18114	0.306522	1	8
GO:0046950	biological_process	cellular ketone body metabolic process	8/30771	9/40888	1.18114	0.306522	1	8
GO:0046951	biological_process	ketone body biosynthetic process	8/30771	9/40888	1.18114	0.306522	1	8
GO:0047259	molecular_function	glucomannan 4-beta-mannosyltransferase activity	8/30771	9/40888	1.18114	0.306522	1	8
GO:0047958	molecular_function	glycine:2-oxoglutarate aminotransferase activity	8/30771	9/40888	1.18114	0.306522	1	8
GO:0051011	molecular_function	microtubule minus-end binding	8/30771	9/40888	1.18114	0.306522	1	8
GO:0052031	biological_process	modulation by symbiont of host defense response	8/30771	9/40888	1.18114	0.306522	1	8
GO:0052040	biological_process	modulation by symbiont of host programmed cell death	8/30771	9/40888	1.18114	0.306522	1	8
GO:0052173	biological_process	response to defenses of other organism involved in symbiotic interaction	8/30771	9/40888	1.18114	0.306522	1	8
GO:0052200	biological_process	response to host defenses	8/30771	9/40888	1.18114	0.306522	1	8
GO:0052255	biological_process	modulation by organism of defense response of other organism involved in symbiotic interaction	8/30771	9/40888	1.18114	0.306522	1	8
GO:0052863	biological_process	1-deoxy-D-xylulose 5-phosphate metabolic process	8/30771	9/40888	1.18114	0.306522	1	8
GO:0052865	biological_process	1-deoxy-D-xylulose 5-phosphate biosynthetic process	8/30771	9/40888	1.18114	0.306522	1	8
GO:0075136	biological_process	response to host	8/30771	9/40888	1.18114	0.306522	1	8
GO:0090630	biological_process	activation of GTPase activity	8/30771	9/40888	1.18114	0.306522	1	8
GO:0140078	molecular_function	class I DNA-(apurinic or apyrimidinic site) endonuclease activity	8/30771	9/40888	1.18114	0.306522	1	8
GO:1902224	biological_process	ketone body metabolic process	8/30771	9/40888	1.18114	0.306522	1	8
GO:1903340	biological_process	positive regulation of cell wall organization or biogenesis	8/30771	9/40888	1.18114	0.306522	1	8
GO:2000038	biological_process	regulation of stomatal complex development	8/30771	9/40888	1.18114	0.306522	1	8
GO:0006690	biological_process	icosanoid metabolic process	52/30771	66/40888	1.04692	0.307022	1	52
GO:0016759	molecular_function	cellulose synthase activity	52/30771	66/40888	1.04692	0.307022	1	52
GO:0016760	molecular_function	cellulose synthase (UDP-forming) activity	52/30771	66/40888	1.04692	0.307022	1	52
GO:0030834	biological_process	regulation of actin filament depolymerization	52/30771	66/40888	1.04692	0.307022	1	52
GO:0051258	biological_process	protein polymerization	52/30771	66/40888	1.04692	0.307022	1	52
GO:0009908	biological_process	flower development	614/30771	807/40888	1.011	0.307129	1	614
GO:0000793	cellular_component	condensed chromosome	94/30771	121/40888	1.03228	0.308099	1	94
GO:0016236	biological_process	macroautophagy	110/30771	142/40888	1.02934	0.30817	1	110
GO:0000097	biological_process	sulfur amino acid biosynthetic process	145/30771	188/40888	1.02486	0.308386	1	145
GO:0030170	molecular_function	pyridoxal phosphate binding	343/30771	449/40888	1.01508	0.308999	1	343
GO:0070279	molecular_function	vitamin B6 binding	343/30771	449/40888	1.01508	0.308999	1	343
GO:0010044	biological_process	response to aluminum ion	22/30771	27/40888	1.08271	0.309576	1	22
GO:0017053	cellular_component	transcriptional repressor complex	22/30771	27/40888	1.08271	0.309576	1	22
GO:0032988	biological_process	ribonucleoprotein complex disassembly	22/30771	27/40888	1.08271	0.309576	1	22
GO:0034719	cellular_component	SMN-Sm protein complex	22/30771	27/40888	1.08271	0.309576	1	22
GO:0043967	biological_process	histone H4 acetylation	22/30771	27/40888	1.08271	0.309576	1	22
GO:0048209	biological_process	regulation of vesicle targeting, to, from or within Golgi	22/30771	27/40888	1.08271	0.309576	1	22
GO:0080156	biological_process	mitochondrial mRNA modification	22/30771	27/40888	1.08271	0.309576	1	22
GO:0030276	molecular_function	clathrin binding	129/30771	167/40888	1.02643	0.310125	1	129
GO:0098797	cellular_component	plasma membrane protein complex	167/30771	217/40888	1.02261	0.310802	1	167
GO:0000741	biological_process	karyogamy	42/30771	53/40888	1.053	0.31091	1	42
GO:0009566	biological_process	fertilization	42/30771	53/40888	1.053	0.31091	1	42
GO:0009567	biological_process	double fertilization forming a zygote and endosperm	42/30771	53/40888	1.053	0.31091	1	42
GO:0010197	biological_process	polar nucleus fusion	42/30771	53/40888	1.053	0.31091	1	42
GO:0016646	molecular_function	oxidoreductase activity, acting on the CH-NH group of donors, NAD or NADP as acceptor	42/30771	53/40888	1.053	0.31091	1	42
GO:0031060	biological_process	regulation of histone methylation	42/30771	53/40888	1.053	0.31091	1	42
GO:0051646	biological_process	mitochondrion localization	42/30771	53/40888	1.053	0.31091	1	42
GO:0090333	biological_process	regulation of stomatal closure	113/30771	146/40888	1.02844	0.311344	1	113
GO:0006914	biological_process	autophagy	189/30771	246/40888	1.02089	0.312164	1	189
GO:0061919	biological_process	process utilizing autophagic mechanism	189/30771	246/40888	1.02089	0.312164	1	189
GO:0051445	biological_process	regulation of meiotic cell cycle	32/30771	40/40888	1.06303	0.312797	1	32
GO:0060211	biological_process	regulation of nuclear-transcribed mRNA poly(A) tail shortening	32/30771	40/40888	1.06303	0.312797	1	32
GO:1900151	biological_process	regulation of nuclear-transcribed mRNA catabolic process, deadenylation-dependent decay	32/30771	40/40888	1.06303	0.312797	1	32
GO:0098590	cellular_component	plasma membrane region	68/30771	87/40888	1.03859	0.312821	1	68
GO:0033043	biological_process	regulation of organelle organization	489/30771	642/40888	1.01211	0.312928	1	489
GO:0055075	biological_process	potassium ion homeostasis	55/30771	70/40888	1.04404	0.313318	1	55
GO:0044440	cellular_component	endosomal part	492/30771	646/40888	1.01201	0.313796	1	492
GO:0009066	biological_process	aspartate family amino acid metabolic process	192/30771	250/40888	1.02051	0.314107	1	192
GO:0000124	cellular_component	SAGA complex	15/30771	18/40888	1.10732	0.314464	1	15
GO:0000289	biological_process	nuclear-transcribed mRNA poly(A) tail shortening	15/30771	18/40888	1.10732	0.314464	1	15
GO:0004818	molecular_function	glutamate-tRNA ligase activity	15/30771	18/40888	1.10732	0.314464	1	15
GO:0006424	biological_process	glutamyl-tRNA aminoacylation	15/30771	18/40888	1.10732	0.314464	1	15
GO:0007205	biological_process	protein kinase C-activating G protein-coupled receptor signaling pathway	15/30771	18/40888	1.10732	0.314464	1	15
GO:0008519	molecular_function	ammonium transmembrane transporter activity	15/30771	18/40888	1.10732	0.314464	1	15
GO:0015450	molecular_function	P-P-bond-hydrolysis-driven protein transmembrane transporter activity	15/30771	18/40888	1.10732	0.314464	1	15
GO:0016584	biological_process	nucleosome positioning	15/30771	18/40888	1.10732	0.314464	1	15
GO:0016688	molecular_function	L-ascorbate peroxidase activity	15/30771	18/40888	1.10732	0.314464	1	15
GO:0017017	molecular_function	MAP kinase tyrosine/serine/threonine phosphatase activity	15/30771	18/40888	1.10732	0.314464	1	15
GO:0031114	biological_process	regulation of microtubule depolymerization	15/30771	18/40888	1.10732	0.314464	1	15
GO:0032541	cellular_component	cortical endoplasmic reticulum	15/30771	18/40888	1.10732	0.314464	1	15
GO:0042372	biological_process	phylloquinone biosynthetic process	15/30771	18/40888	1.10732	0.314464	1	15
GO:0042374	biological_process	phylloquinone metabolic process	15/30771	18/40888	1.10732	0.314464	1	15
GO:0043488	biological_process	regulation of mRNA stability	15/30771	18/40888	1.10732	0.314464	1	15
GO:0045263	cellular_component	proton-transporting ATP synthase complex, coupling factor F(o)	15/30771	18/40888	1.10732	0.314464	1	15
GO:0051574	biological_process	positive regulation of histone H3-K9 methylation	15/30771	18/40888	1.10732	0.314464	1	15
GO:1903320	biological_process	regulation of protein modification by small protein conjugation or removal	15/30771	18/40888	1.10732	0.314464	1	15
GO:0032543	biological_process	mitochondrial translation	100/30771	129/40888	1.03006	0.315268	1	100
GO:0017038	biological_process	protein import	195/30771	254/40888	1.02013	0.316012	1	195
GO:0044093	biological_process	positive regulation of molecular function	119/30771	154/40888	1.02679	0.317377	1	119
GO:0022804	molecular_function	active transmembrane transporter activity	1415/30771	1868/40888	1.00655	0.317602	1	1415
GO:0044085	biological_process	cellular component biogenesis	2772/30771	3667/40888	1.00447	0.318297	1	2772
GO:0007005	biological_process	mitochondrion organization	267/30771	349/40888	1.01658	0.318449	1	267
GO:0010027	biological_process	thylakoid membrane organization	45/30771	57/40888	1.04904	0.318458	1	45
GO:0070008	molecular_function	serine-type exopeptidase activity	87/30771	112/40888	1.03218	0.318958	1	87
GO:0010927	biological_process	cellular component assembly involved in morphogenesis	58/30771	74/40888	1.04148	0.31916	1	58
GO:0048285	biological_process	organelle fission	245/30771	320/40888	1.01735	0.319205	1	245
GO:0006164	biological_process	purine nucleotide biosynthetic process	320/30771	419/40888	1.01482	0.32003	1	320
GO:0000110	cellular_component	nucleotide-excision repair factor 1 complex	4/30771	4/40888	1.32878	0.320747	1	4
GO:0001944	biological_process	vasculature development	4/30771	4/40888	1.32878	0.320747	1	4
GO:0002054	molecular_function	nucleobase binding	4/30771	4/40888	1.32878	0.320747	1	4
GO:0002058	molecular_function	uracil binding	4/30771	4/40888	1.32878	0.320747	1	4
GO:0002061	molecular_function	pyrimidine nucleobase binding	4/30771	4/40888	1.32878	0.320747	1	4
GO:0003839	molecular_function	gamma-glutamylcyclotransferase activity	4/30771	4/40888	1.32878	0.320747	1	4
GO:0003842	molecular_function	1-pyrroline-5-carboxylate dehydrogenase activity	4/30771	4/40888	1.32878	0.320747	1	4
GO:0004561	molecular_function	alpha-N-acetylglucosaminidase activity	4/30771	4/40888	1.32878	0.320747	1	4
GO:0004751	molecular_function	ribose-5-phosphate isomerase activity	4/30771	4/40888	1.32878	0.320747	1	4
GO:0004848	molecular_function	ureidoglycolate hydrolase activity	4/30771	4/40888	1.32878	0.320747	1	4
GO:0005354	molecular_function	galactose transmembrane transporter activity	4/30771	4/40888	1.32878	0.320747	1	4
GO:0006063	biological_process	uronic acid metabolic process	4/30771	4/40888	1.32878	0.320747	1	4
GO:0006110	biological_process	regulation of glycolytic process	4/30771	4/40888	1.32878	0.320747	1	4
GO:0006123	biological_process	mitochondrial electron transport, cytochrome c to oxygen	4/30771	4/40888	1.32878	0.320747	1	4
GO:0006480	biological_process	N-terminal protein amino acid methylation	4/30771	4/40888	1.32878	0.320747	1	4
GO:0006750	biological_process	glutathione biosynthetic process	4/30771	4/40888	1.32878	0.320747	1	4
GO:0007080	biological_process	mitotic metaphase plate congression	4/30771	4/40888	1.32878	0.320747	1	4
GO:0008153	biological_process	para-aminobenzoic acid biosynthetic process	4/30771	4/40888	1.32878	0.320747	1	4
GO:0008240	molecular_function	tripeptidyl-peptidase activity	4/30771	4/40888	1.32878	0.320747	1	4
GO:0008309	molecular_function	double-stranded DNA exodeoxyribonuclease activity	4/30771	4/40888	1.32878	0.320747	1	4
GO:0008535	biological_process	respiratory chain complex IV assembly	4/30771	4/40888	1.32878	0.320747	1	4
GO:0008835	molecular_function	diaminohydroxyphosphoribosylaminopyrimidine deaminase activity	4/30771	4/40888	1.32878	0.320747	1	4
GO:0009969	biological_process	xyloglucan biosynthetic process	4/30771	4/40888	1.32878	0.320747	1	4
GO:0009992	biological_process	cellular water homeostasis	4/30771	4/40888	1.32878	0.320747	1	4
GO:0010055	biological_process	atrichoblast differentiation	4/30771	4/40888	1.32878	0.320747	1	4
GO:0010069	biological_process	zygote asymmetric cytokinesis in embryo sac	4/30771	4/40888	1.32878	0.320747	1	4
GO:0010070	biological_process	zygote asymmetric cell division	4/30771	4/40888	1.32878	0.320747	1	4
GO:0010361	biological_process	regulation of anion channel activity by blue light	4/30771	4/40888	1.32878	0.320747	1	4
GO:0010362	biological_process	negative regulation of anion channel activity by blue light	4/30771	4/40888	1.32878	0.320747	1	4
GO:0010424	biological_process	DNA methylation on cytosine within a CG sequence	4/30771	4/40888	1.32878	0.320747	1	4
GO:0010438	biological_process	cellular response to sulfur starvation	4/30771	4/40888	1.32878	0.320747	1	4
GO:0015148	molecular_function	D-xylose transmembrane transporter activity	4/30771	4/40888	1.32878	0.320747	1	4
GO:0015168	molecular_function	glycerol transmembrane transporter activity	4/30771	4/40888	1.32878	0.320747	1	4
GO:0015575	molecular_function	mannitol transmembrane transporter activity	4/30771	4/40888	1.32878	0.320747	1	4
GO:0015576	molecular_function	sorbitol transmembrane transporter activity	4/30771	4/40888	1.32878	0.320747	1	4
GO:0015591	molecular_function	D-ribose transmembrane transporter activity	4/30771	4/40888	1.32878	0.320747	1	4
GO:0015603	molecular_function	iron chelate transmembrane transporter activity	4/30771	4/40888	1.32878	0.320747	1	4
GO:0015665	molecular_function	alcohol transmembrane transporter activity	4/30771	4/40888	1.32878	0.320747	1	4
GO:0015750	biological_process	pentose transmembrane transport	4/30771	4/40888	1.32878	0.320747	1	4
GO:0015751	biological_process	arabinose transmembrane transport	4/30771	4/40888	1.32878	0.320747	1	4
GO:0016210	molecular_function	naringenin-chalcone synthase activity	4/30771	4/40888	1.32878	0.320747	1	4
GO:0017113	molecular_function	dihydropyrimidine dehydrogenase (NADP+) activity	4/30771	4/40888	1.32878	0.320747	1	4
GO:0018027	biological_process	peptidyl-lysine dimethylation	4/30771	4/40888	1.32878	0.320747	1	4
GO:0019133	molecular_function	choline monooxygenase activity	4/30771	4/40888	1.32878	0.320747	1	4
GO:0019184	biological_process	nonribosomal peptide biosynthetic process	4/30771	4/40888	1.32878	0.320747	1	4
GO:0019433	biological_process	triglyceride catabolic process	4/30771	4/40888	1.32878	0.320747	1	4
GO:0019586	biological_process	galacturonate metabolic process	4/30771	4/40888	1.32878	0.320747	1	4
[truncated: 7,336 more rows]

## Sheet: Group.Fo-12d_vs_ca.demiRNA_targ
Term ID	Category	Description	GeneRatio	BgRatio	Enrich_factor	P_value	P_adjust	GeneCount
GO:0003700	molecular_function	DNA-binding transcription factor activity	856/22609	1208/40888	1.28151	1.39523e-29	1.27105e-25	856
GO:0140110	molecular_function	transcription regulator activity	979/22609	1431/40888	1.23725	4.02262e-25	1.8323e-21	979
GO:0043565	molecular_function	sequence-specific DNA binding	666/22609	987/40888	1.22031	1.8324e-15	5.5644e-12	666
GO:0031323	biological_process	regulation of cellular metabolic process	2249/22609	3667/40888	1.10916	5.54983e-15	1.26397e-11	2249
GO:0000976	molecular_function	transcription regulatory region sequence-specific DNA binding	380/22609	533/40888	1.28935	1.6299e-14	2.12119e-11	380
GO:0001067	molecular_function	regulatory region nucleic acid binding	380/22609	533/40888	1.28935	1.6299e-14	2.12119e-11	380
GO:0044212	molecular_function	transcription regulatory region DNA binding	380/22609	533/40888	1.28935	1.6299e-14	2.12119e-11	380
GO:0019219	biological_process	regulation of nucleobase-containing compound metabolic process	1428/22609	2270/40888	1.13767	2.41064e-14	2.74511e-11	1428
GO:0031224	cellular_component	intrinsic component of membrane	4564/22609	7722/40888	1.06888	3.70486e-14	3.75014e-11	4564
GO:2001141	biological_process	regulation of RNA biosynthetic process	1211/22609	1908/40888	1.14784	7.42605e-14	6.5289e-11	1211
GO:0006355	biological_process	regulation of transcription, DNA-templated	1210/22609	1907/40888	1.14749	8.60273e-14	6.5289e-11	1210
GO:1903506	biological_process	regulation of nucleic acid-templated transcription	1210/22609	1907/40888	1.14749	8.60273e-14	6.5289e-11	1210
GO:0051252	biological_process	regulation of RNA metabolic process	1348/22609	2141/40888	1.13864	9.31677e-14	6.5289e-11	1348
GO:0010556	biological_process	regulation of macromolecule biosynthetic process	1604/22609	2579/40888	1.12478	1.39129e-13	9.05331e-11	1604
GO:2000112	biological_process	regulation of cellular macromolecule biosynthetic process	1599/22609	2573/40888	1.12389	2.19877e-13	1.33539e-10	1599
GO:0009889	biological_process	regulation of biosynthetic process	1757/22609	2851/40888	1.11452	7.77607e-13	4.4275e-10	1757
GO:1990837	molecular_function	sequence-specific double-stranded DNA binding	422/22609	610/40888	1.25111	1.08561e-12	5.72257e-10	422
GO:0016021	cellular_component	integral component of membrane	4441/22609	7537/40888	1.06561	1.13069e-12	5.72257e-10	4441
GO:0031326	biological_process	regulation of cellular biosynthetic process	1735/22609	2819/40888	1.11306	2.01743e-12	9.67304e-10	1735
GO:0051171	biological_process	regulation of nitrogen compound metabolic process	1982/22609	3249/40888	1.10324	4.11374e-12	1.87381e-09	1982
GO:0003690	molecular_function	double-stranded DNA binding	520/22609	774/40888	1.215	6.547e-12	2.75777e-09	520
GO:0019222	biological_process	regulation of metabolic process	2698/22609	4495/40888	1.08549	6.65982e-12	2.75777e-09	2698
GO:0050794	biological_process	regulation of cellular process	4628/22609	7896/40888	1.05999	2.04615e-11	8.10453e-09	4628
GO:0080090	biological_process	regulation of primary metabolic process	2013/22609	3314/40888	1.09851	2.19554e-11	8.3339e-09	2013
GO:0010468	biological_process	regulation of gene expression	2038/22609	3358/40888	1.09758	2.43634e-11	8.87801e-09	2038
GO:0050789	biological_process	regulation of biological process	5370/22609	9217/40888	1.05366	3.78911e-11	1.32765e-08	5370
GO:0060255	biological_process	regulation of macromolecule metabolic process	2348/22609	3909/40888	1.08629	1.34465e-10	4.53694e-08	2348
GO:0044425	cellular_component	membrane part	5406/22609	9314/40888	1.04967	6.607e-10	2.14963e-07	5406
GO:0065007	biological_process	biological regulation	6224/22609	10800/40888	1.04222	6.57203e-09	2.06453e-06	6224
GO:0003677	molecular_function	DNA binding	1836/22609	3056/40888	1.08651	1.59045e-08	4.82966e-06	1836
GO:0048856	biological_process	anatomical structure development	3081/22609	5281/40888	1.05509	9.38849e-07	0.0002759	3081
GO:0010033	biological_process	response to organic substance	2251/22609	3819/40888	1.06596	9.85103e-07	0.000280446	2251
GO:0032502	biological_process	developmental process	3161/22609	5425/40888	1.05375	1.16355e-06	0.000312173	3161
GO:0009725	biological_process	response to hormone	1619/22609	2714/40888	1.07883	1.16508e-06	0.000312173	1619
GO:0000981	molecular_function	DNA-binding transcription factor activity, RNA polymerase II-specific	130/22609	179/40888	1.31342	1.28862e-06	0.00033541	130
GO:0009719	biological_process	response to endogenous stimulus	1670/22609	2805/40888	1.07671	1.4546e-06	0.000368096	1670
GO:0050896	biological_process	response to stimulus	6640/22609	11627/40888	1.0328	1.72465e-06	0.000424638	6640
GO:0016020	cellular_component	membrane	8331/22609	14681/40888	1.02626	5.13863e-06	0.00123192	8331
GO:0010200	biological_process	response to chitin	116/22609	160/40888	1.31115	5.38978e-06	0.001259	116
GO:0009706	cellular_component	chloroplast inner membrane	133/22609	187/40888	1.28625	6.13529e-06	0.00139731	133
GO:0045488	biological_process	pectin metabolic process	113/22609	157/40888	1.30165	1.23615e-05	0.00274666	113
GO:0010393	biological_process	galacturonan metabolic process	118/22609	165/40888	1.29334	1.31753e-05	0.00285779	118
GO:0000987	molecular_function	proximal promoter sequence-specific DNA binding	109/22609	151/40888	1.30546	1.41145e-05	0.00299031	109
GO:0031969	cellular_component	chloroplast membrane	321/22609	498/40888	1.16571	1.82368e-05	0.00377584	321
GO:0009617	biological_process	response to bacterium	654/22609	1064/40888	1.11161	2.13302e-05	0.00431818	654
GO:0019748	biological_process	secondary metabolic process	296/22609	457/40888	1.17136	2.18406e-05	0.00432539	296
GO:0009528	cellular_component	plastid inner membrane	133/22609	190/40888	1.26594	2.23206e-05	0.0043264	133
GO:0032501	biological_process	multicellular organismal process	2965/22609	5119/40888	1.0475	2.75469e-05	0.00522817	2965
GO:0042170	cellular_component	plastid membrane	327/22609	510/40888	1.15956	2.89531e-05	0.00538292	327
GO:0042221	biological_process	response to chemical	3557/22609	6171/40888	1.04242	2.98634e-05	0.00544111	3557
GO:0007275	biological_process	multicellular organism development	2710/22609	4669/40888	1.04969	3.12015e-05	0.00557345	2710
GO:0042802	molecular_function	identical protein binding	467/22609	748/40888	1.12909	3.89642e-05	0.00682623	467
GO:0000978	molecular_function	RNA polymerase II proximal promoter sequence-specific DNA binding	98/22609	136/40888	1.30317	4.20986e-05	0.00723619	98
GO:0051704	biological_process	multi-organism process	1933/22609	3301/40888	1.05901	4.36201e-05	0.00735888	1933
GO:0071944	cellular_component	cell periphery	4731/22609	8270/40888	1.03457	4.6754e-05	0.00774415	4731
GO:0048522	biological_process	positive regulation of cellular process	1089/22609	1823/40888	1.08033	4.97961e-05	0.00810076	1089
GO:0006952	biological_process	defense response	1526/22609	2589/40888	1.06595	6.00505e-05	0.00959755	1526
GO:0048519	biological_process	negative regulation of biological process	1446/22609	2449/40888	1.06781	6.18306e-05	0.00964607	1446
GO:0031226	cellular_component	intrinsic component of plasma membrane	228/22609	348/40888	1.18487	6.24718e-05	0.00964607	228
GO:0009605	biological_process	response to external stimulus	1799/22609	3070/40888	1.05976	6.69759e-05	0.0101692	1799
GO:0005886	cellular_component	plasma membrane	4250/22609	7423/40888	1.03544	9.03283e-05	0.01349	4250
GO:0048731	biological_process	system development	1951/22609	3342/40888	1.05576	9.53648e-05	0.0139691	1951
GO:0000977	molecular_function	RNA polymerase II regulatory region sequence-specific DNA binding	143/22609	210/40888	1.23149	9.90172e-05	0.0139691	143
GO:0001012	molecular_function	RNA polymerase II regulatory region DNA binding	143/22609	210/40888	1.23149	9.90172e-05	0.0139691	143
GO:0043207	biological_process	response to external biotic stimulus	1345/22609	2277/40888	1.06825	0.000101203	0.0139691	1345
GO:0051707	biological_process	response to other organism	1345/22609	2277/40888	1.06825	0.000101203	0.0139691	1345
GO:0031327	biological_process	negative regulation of cellular biosynthetic process	349/22609	553/40888	1.14134	0.000105874	0.0143958	349
GO:0048831	biological_process	regulation of shoot system development	286/22609	447/40888	1.15711	0.000109387	0.0146546	286
GO:0048523	biological_process	negative regulation of cellular process	830/22609	1380/40888	1.08771	0.000119903	0.0158306	830
GO:0040008	biological_process	regulation of growth	415/22609	666/40888	1.12691	0.000128426	0.0167137	415
GO:1901700	biological_process	response to oxygen-containing compound	1811/22609	3099/40888	1.05685	0.000131086	0.0168196	1811
GO:0009890	biological_process	negative regulation of biosynthetic process	350/22609	556/40888	1.13843	0.000137936	0.0174528	350
GO:0031324	biological_process	negative regulation of cellular metabolic process	445/22609	718/40888	1.12086	0.000149385	0.0186425	445
GO:0046777	biological_process	protein autophosphorylation	483/22609	784/40888	1.11415	0.000177143	0.0218078	483
GO:0071310	biological_process	cellular response to organic substance	1379/22609	2345/40888	1.0635	0.000224384	0.0272552	1379
GO:0045229	biological_process	external encapsulating structure organization	421/22609	680/40888	1.11966	0.000250542	0.0300321	421
GO:0051172	biological_process	negative regulation of nitrogen compound metabolic process	392/22609	631/40888	1.1235	0.000273392	0.0319308	392
GO:0071555	biological_process	cell wall organization	392/22609	631/40888	1.1235	0.000273392	0.0319308	392
GO:0004672	molecular_function	protein kinase activity	1348/22609	2293/40888	1.06316	0.000280971	0.0324006	1348
GO:1900865	biological_process	chloroplast RNA modification	28/22609	33/40888	1.53447	0.000329825	0.037251	28
GO:0042742	biological_process	defense response to bacterium	504/22609	824/40888	1.10616	0.000331211	0.037251	504
GO:0050793	biological_process	regulation of developmental process	848/22609	1420/40888	1.08	0.000341198	0.0379063	848
GO:0009607	biological_process	response to biotic stimulus	1381/22609	2354/40888	1.06097	0.000368509	0.0404472	1381
GO:0048518	biological_process	positive regulation of biological process	1395/22609	2379/40888	1.06046	0.000381122	0.0404742	1395
GO:0009653	biological_process	anatomical structure morphogenesis	1037/22609	1751/40888	1.07104	0.000383368	0.0404742	1037
GO:0071554	biological_process	cell wall organization or biogenesis	504/22609	825/40888	1.10482	0.000385416	0.0404742	504
GO:0009755	biological_process	hormone-mediated signaling pathway	954/22609	1606/40888	1.07428	0.000386526	0.0404742	954
GO:0031425	biological_process	chloroplast RNA processing	25/22609	29/40888	1.55904	0.000425125	0.0437897	25
GO:2000377	biological_process	regulation of reactive oxygen species metabolic process	54/22609	72/40888	1.35636	0.000433934	0.0437897	54
GO:0009451	biological_process	RNA modification	297/22609	472/40888	1.13797	0.000436606	0.0437897	297
GO:0055081	biological_process	anion homeostasis	72/22609	100/40888	1.30211	0.000437416	0.0437897	72
GO:0032870	biological_process	cellular response to hormone stimulus	1023/22609	1728/40888	1.07065	0.000446556	0.0442187	1023
GO:0005976	biological_process	polysaccharide metabolic process	416/22609	675/40888	1.11456	0.000456251	0.044693	416
GO:0006468	biological_process	protein phosphorylation	979/22609	1652/40888	1.07173	0.000492918	0.0477711	979
GO:0045489	biological_process	pectin biosynthetic process	59/22609	80/40888	1.33376	0.000510981	0.0490004	59
GO:0048366	biological_process	leaf development	357/22609	575/40888	1.12283	0.000527428	0.0497424	357
GO:0071495	biological_process	cellular response to endogenous stimulus	1074/22609	1819/40888	1.06779	0.000529639	0.0497424	1074
GO:0048583	biological_process	regulation of response to stimulus	908/22609	1529/40888	1.07397	0.000552319	0.0513431	908
GO:0009941	cellular_component	chloroplast envelope	662/22609	1101/40888	1.08739	0.000575829	0.0529879	662
GO:0004888	molecular_function	transmembrane signaling receptor activity	145/22609	219/40888	1.1974	0.000633159	0.0576808	145
GO:2000652	biological_process	regulation of secondary cell wall biogenesis	24/22609	28/40888	1.55013	0.000668475	0.0602951	24
GO:0090406	cellular_component	pollen tube	102/22609	149/40888	1.23802	0.000691239	0.0610199	102
GO:0044434	cellular_component	chloroplast part	1429/22609	2446/40888	1.05655	0.000701936	0.0610199	1429
GO:0023052	biological_process	signaling	2017/22609	3485/40888	1.04669	0.0007051	0.0610199	2017
GO:0009960	biological_process	endosperm development	43/22609	56/40888	1.38866	0.000706601	0.0610199	43
GO:0051239	biological_process	regulation of multicellular organismal process	657/22609	1094/40888	1.08608	0.000710001	0.0610199	657
GO:0070887	biological_process	cellular response to chemical stimulus	1709/22609	2941/40888	1.0509	0.000753192	0.0641269	1709
GO:0005887	cellular_component	integral component of plasma membrane	131/22609	197/40888	1.2026	0.00086713	0.0727628	131
GO:0010558	biological_process	negative regulation of macromolecule biosynthetic process	319/22609	513/40888	1.12457	0.000870597	0.0727628	319
GO:0007165	biological_process	signal transduction	1991/22609	3443/40888	1.0458	0.00093409	0.0773597	1991
GO:0000271	biological_process	polysaccharide biosynthetic process	251/22609	398/40888	1.14053	0.000956917	0.0785361	251
GO:2000068	biological_process	regulation of defense response to insect	15/22609	16/40888	1.69545	0.00106251	0.0864241	15
GO:0009526	cellular_component	plastid envelope	677/22609	1133/40888	1.08062	0.00118071	0.0951884	677
GO:0031325	biological_process	positive regulation of cellular metabolic process	728/22609	1222/40888	1.07739	0.00120153	0.0953514	728
GO:2000241	biological_process	regulation of reproductive process	339/22609	549/40888	1.11671	0.00120367	0.0953514	339
GO:0016773	molecular_function	phosphotransferase activity, alcohol group as acceptor	1578/22609	2716/40888	1.05073	0.00122718	0.0963757	1578
GO:0016744	molecular_function	transferase activity, transferring aldehyde or ketonic groups	45/22609	60/40888	1.35636	0.00128563	0.100103	45
GO:0009891	biological_process	positive regulation of biosynthetic process	547/22609	908/40888	1.08947	0.00130676	0.100887	547
GO:0044435	cellular_component	plastid part	1442/22609	2477/40888	1.05282	0.00134345	0.102847	1442
GO:0048827	biological_process	phyllome development	486/22609	803/40888	1.09455	0.001415	0.107422	486
GO:1900367	biological_process	positive regulation of defense response to insect	11/22609	11/40888	1.80848	0.00147594	0.111122	11
GO:0005853	cellular_component	eukaryotic translation elongation factor 1 complex	22/22609	26/40888	1.53026	0.00162733	0.121516	22
GO:0042285	molecular_function	xylosyltransferase activity	17/22609	19/40888	1.61812	0.00165131	0.122304	17
GO:2000026	biological_process	regulation of multicellular organismal development	608/22609	1016/40888	1.08224	0.00169315	0.124392	608
GO:0009909	biological_process	regulation of flower development	177/22609	276/40888	1.15979	0.00172608	0.125797	177
GO:0010336	biological_process	gibberellic acid homeostasis	14/22609	15/40888	1.68792	0.00181052	0.130903	14
GO:0031225	cellular_component	anchored component of membrane	136/22609	208/40888	1.18247	0.00192029	0.136497	136
GO:0045824	biological_process	negative regulation of innate immune response	40/22609	53/40888	1.36489	0.00193283	0.136497	40
GO:0050777	biological_process	negative regulation of immune response	40/22609	53/40888	1.36489	0.00193283	0.136497	40
GO:0031967	cellular_component	organelle envelope	1451/22609	2498/40888	1.05048	0.00198461	0.138013	1451
GO:0031975	cellular_component	envelope	1451/22609	2498/40888	1.05048	0.00198461	0.138013	1451
GO:0010646	biological_process	regulation of cell communication	433/22609	714/40888	1.09674	0.00202543	0.13974	433
GO:0009507	cellular_component	chloroplast	2638/22609	4605/40888	1.036	0.00204012	0.13974	2638
GO:0010647	biological_process	positive regulation of cell communication	134/22609	205/40888	1.18213	0.00209629	0.141927	134
GO:2000113	biological_process	negative regulation of cellular macromolecule biosynthetic process	309/22609	501/40888	1.11541	0.00211736	0.141927	309
GO:0051879	molecular_function	Hsp90 protein binding	30/22609	38/40888	1.42775	0.00211878	0.141927	30
GO:1903338	biological_process	regulation of cell wall organization or biogenesis	47/22609	64/40888	1.3281	0.00215086	0.14282	47
GO:0044038	biological_process	cell wall macromolecule biosynthetic process	54/22609	75/40888	1.30211	0.00219482	0.14282	54
GO:0045177	cellular_component	apical part of cell	54/22609	75/40888	1.30211	0.00219482	0.14282	54
GO:0070589	biological_process	cellular component macromolecule biosynthetic process	54/22609	75/40888	1.30211	0.00219482	0.14282	54
GO:0045490	biological_process	pectin catabolic process	45/22609	61/40888	1.33413	0.00228349	0.147536	45
GO:0031328	biological_process	positive regulation of cellular biosynthetic process	534/22609	890/40888	1.08509	0.00232589	0.149217	534
GO:0070592	biological_process	cell wall polysaccharide biosynthetic process	52/22609	72/40888	1.30613	0.00235853	0.150253	52
GO:0007568	biological_process	aging	166/22609	259/40888	1.15911	0.00243437	0.153913	166
GO:0099402	biological_process	plant organ development	1090/22609	1864/40888	1.05754	0.00247633	0.153913	1090
GO:0007154	biological_process	cell communication	2259/22609	3934/40888	1.03848	0.00247738	0.153913	2259
GO:0045935	biological_process	positive regulation of nucleobase-containing compound metabolic process	409/22609	674/40888	1.09743	0.00248355	0.153913	409
GO:0070678	molecular_function	preprotein binding	21/22609	25/40888	1.51913	0.00251745	0.154959	21
GO:0044459	cellular_component	plasma membrane part	418/22609	690/40888	1.09557	0.00264758	0.161679	418
GO:0009664	biological_process	plant-type cell wall organization	119/22609	181/40888	1.189	0.00266912	0.161679	119
GO:0009893	biological_process	positive regulation of metabolic process	810/22609	1373/40888	1.06691	0.00267986	0.161679	810
GO:0016413	molecular_function	O-acetyltransferase activity	37/22609	49/40888	1.36559	0.00279411	0.167463	37
GO:0033993	biological_process	response to lipid	857/22609	1456/40888	1.06447	0.0028371	0.168928	857
GO:0009966	biological_process	regulation of signal transduction	428/22609	708/40888	1.09326	0.00291962	0.170811	428
GO:0023051	biological_process	regulation of signaling	428/22609	708/40888	1.09326	0.00291962	0.170811	428
GO:0048638	biological_process	regulation of developmental growth	156/22609	243/40888	1.161	0.00292497	0.170811	156
GO:0080135	biological_process	regulation of cellular response to stress	103/22609	155/40888	1.20177	0.00301167	0.174754	103
GO:0031012	cellular_component	extracellular matrix	13/22609	14/40888	1.67931	0.00307335	0.177204	13
GO:0014070	biological_process	response to organic cyclic compound	346/22609	567/40888	1.10359	0.00314764	0.179714	346
GO:0010557	biological_process	positive regulation of macromolecule biosynthetic process	494/22609	823/40888	1.08553	0.00315885	0.179714	494
GO:0009791	biological_process	post-embryonic development	1466/22609	2531/40888	1.04751	0.00318321	0.179714	1466
GO:0051651	biological_process	maintenance of location in cell	56/22609	79/40888	1.28196	0.00325197	0.179714	56
GO:0045893	biological_process	positive regulation of transcription, DNA-templated	354/22609	581/40888	1.1019	0.00325497	0.179714	354
GO:1902680	biological_process	positive regulation of RNA biosynthetic process	354/22609	581/40888	1.1019	0.00325497	0.179714	354
GO:1903508	biological_process	positive regulation of nucleic acid-templated transcription	354/22609	581/40888	1.1019	0.00325497	0.179714	354
GO:0032922	biological_process	circadian regulation of gene expression	40/22609	54/40888	1.33962	0.00348663	0.191344	40
GO:0071365	biological_process	cellular response to auxin stimulus	271/22609	439/40888	1.1164	0.00354728	0.193507	271
GO:0002683	biological_process	negative regulation of immune system process	59/22609	84/40888	1.27024	0.00358472	0.193548	59
GO:0001558	biological_process	regulation of cell growth	165/22609	259/40888	1.15212	0.00359649	0.193548	165
GO:0044550	biological_process	secondary metabolite biosynthetic process	178/22609	281/40888	1.14559	0.00366666	0.193548	178
GO:0009415	biological_process	response to water	412/22609	682/40888	1.09251	0.00366945	0.193548	412
GO:0001216	molecular_function	DNA-binding transcription activator activity	38/22609	51/40888	1.3475	0.00368305	0.193548	38
GO:0009734	biological_process	auxin-activated signaling pathway	258/22609	417/40888	1.11892	0.00369235	0.193548	258
GO:0051052	biological_process	regulation of DNA metabolic process	105/22609	159/40888	1.19428	0.00372506	0.193548	105
GO:0048608	biological_process	reproductive structure development	1230/22609	2116/40888	1.05125	0.00373925	0.193548	1230
GO:0061458	biological_process	reproductive system development	1230/22609	2116/40888	1.05125	0.00373925	0.193548	1230
GO:0051254	biological_process	positive regulation of RNA metabolic process	387/22609	639/40888	1.09528	0.00379016	0.195075	387
GO:0031048	biological_process	chromatin silencing by small RNA	20/22609	24/40888	1.50707	0.00387003	0.196101	20
GO:0015706	biological_process	nitrate transport	36/22609	48/40888	1.35636	0.00387276	0.196101	36
GO:0051253	biological_process	negative regulation of RNA metabolic process	259/22609	419/40888	1.11789	0.00388446	0.196101	259
GO:0009967	biological_process	positive regulation of signal transduction	129/22609	199/40888	1.17233	0.00389619	0.196101	129
GO:0003006	biological_process	developmental process involved in reproduction	1462/22609	2527/40888	1.0463	0.00395197	0.197815	1462
GO:0006950	biological_process	response to stress	4095/22609	7222/40888	1.02544	0.00415969	0.207075	4095
GO:0023056	biological_process	positive regulation of signaling	130/22609	201/40888	1.16967	0.00424412	0.208265	130
GO:0006275	biological_process	regulation of DNA replication	60/22609	86/40888	1.26173	0.00424464	0.208265	60
GO:0019199	molecular_function	transmembrane receptor protein kinase activity	81/22609	120/40888	1.22073	0.00425218	0.208265	81
GO:0032269	biological_process	negative regulation of cellular protein metabolic process	95/22609	143/40888	1.20144	0.00431802	0.209826	95
GO:0051087	molecular_function	chaperone binding	30/22609	39/40888	1.39114	0.0043301	0.209826	30
GO:0032507	biological_process	maintenance of protein location in cell	26/22609	33/40888	1.42487	0.00442742	0.211572	26
GO:0045185	biological_process	maintenance of protein location	26/22609	33/40888	1.42487	0.00442742	0.211572	26
GO:1905392	biological_process	plant organ morphogenesis	474/22609	791/40888	1.08372	0.00443581	0.211572	474
GO:0009414	biological_process	response to water deprivation	403/22609	668/40888	1.09105	0.00453879	0.215356	403
GO:0009741	biological_process	response to brassinosteroid	150/22609	235/40888	1.15435	0.00477397	0.218868	150
GO:0098542	biological_process	defense response to other organism	989/22609	1694/40888	1.05584	0.00478562	0.218868	989
GO:0005869	cellular_component	dynactin complex	9/22609	9/40888	1.80848	0.00482903	0.218868	9
GO:0005948	cellular_component	acetolactate synthase complex	9/22609	9/40888	1.80848	0.00482903	0.218868	9
GO:0008661	molecular_function	1-deoxy-D-xylulose-5-phosphate synthase activity	9/22609	9/40888	1.80848	0.00482903	0.218868	9
GO:0052863	biological_process	1-deoxy-D-xylulose 5-phosphate metabolic process	9/22609	9/40888	1.80848	0.00482903	0.218868	9
GO:0052865	biological_process	1-deoxy-D-xylulose 5-phosphate biosynthetic process	9/22609	9/40888	1.80848	0.00482903	0.218868	9
GO:0072318	biological_process	clathrin coat disassembly	9/22609	9/40888	1.80848	0.00482903	0.218868	9
GO:0072319	biological_process	vesicle uncoating	9/22609	9/40888	1.80848	0.00482903	0.218868	9
GO:0090693	biological_process	plant organ senescence	138/22609	215/40888	1.16079	0.00494569	0.222644	138
GO:0060089	molecular_function	molecular transducer activity	339/22609	558/40888	1.0987	0.00496122	0.222644	339
GO:0048367	biological_process	shoot system development	829/22609	1413/40888	1.06103	0.00500903	0.223688	829
GO:0035690	biological_process	cellular response to drug	114/22609	175/40888	1.1781	0.00506059	0.224888	114
GO:0033198	biological_process	response to ATP	12/22609	13/40888	1.66937	0.00519443	0.225709	12
GO:0071318	biological_process	cellular response to ATP	12/22609	13/40888	1.66937	0.00519443	0.225709	12
GO:0106167	biological_process	extracellular ATP signaling	12/22609	13/40888	1.66937	0.00519443	0.225709	12
GO:0048580	biological_process	regulation of post-embryonic development	426/22609	709/40888	1.08662	0.0052578	0.225709	426
GO:0009789	biological_process	positive regulation of abscisic acid-activated signaling pathway	80/22609	119/40888	1.21579	0.00526982	0.225709	80
GO:1901421	biological_process	positive regulation of response to alcohol	80/22609	119/40888	1.21579	0.00526982	0.225709	80
GO:1905959	biological_process	positive regulation of cellular response to alcohol	80/22609	119/40888	1.21579	0.00526982	0.225709	80
GO:0004523	molecular_function	RNA-DNA hybrid ribonuclease activity	17/22609	20/40888	1.53721	0.00530205	0.225709	17
GO:0031670	biological_process	cellular response to nutrient	17/22609	20/40888	1.53721	0.00530205	0.225709	17
GO:0006004	biological_process	fucose metabolic process	35/22609	47/40888	1.34674	0.00533636	0.226113	35
GO:0010150	biological_process	leaf senescence	136/22609	212/40888	1.16016	0.00538769	0.227231	136
GO:0048509	biological_process	regulation of meristem development	168/22609	266/40888	1.1422	0.00551009	0.231322	168
GO:0009733	biological_process	response to auxin	405/22609	673/40888	1.08831	0.00555638	0.231546	405
GO:1902679	biological_process	negative regulation of RNA biosynthetic process	256/22609	416/40888	1.11291	0.00559168	0.231546	256
GO:1903507	biological_process	negative regulation of nucleic acid-templated transcription	256/22609	416/40888	1.11291	0.00559168	0.231546	256
GO:0007006	biological_process	mitochondrial membrane organization	33/22609	44/40888	1.35636	0.00562166	0.231734	33
GO:0009698	biological_process	phenylpropanoid metabolic process	175/22609	278/40888	1.13843	0.00569012	0.2335	175
GO:0001101	biological_process	response to acid chemical	1313/22609	2269/40888	1.04651	0.00590416	0.240507	1313
GO:0031348	biological_process	negative regulation of defense response	131/22609	204/40888	1.16133	0.00591367	0.240507	131
GO:0016706	molecular_function	2-oxoglutarate-dependent dioxygenase activity	40/22609	55/40888	1.31526	0.00598867	0.242474	40
GO:0002832	biological_process	negative regulation of response to biotic stimulus	87/22609	131/40888	1.20105	0.00620764	0.248033	87
GO:0032102	biological_process	negative regulation of response to external stimulus	87/22609	131/40888	1.20105	0.00620764	0.248033	87
GO:0043901	biological_process	negative regulation of multi-organism process	87/22609	131/40888	1.20105	0.00620764	0.248033	87
GO:0055083	biological_process	monovalent inorganic anion homeostasis	21/22609	26/40888	1.4607	0.00625596	0.248872	21
GO:0007007	biological_process	inner mitochondrial membrane organization	27/22609	35/40888	1.39512	0.00630011	0.249433	27
GO:0015171	molecular_function	amino acid transmembrane transporter activity	76/22609	113/40888	1.21633	0.0063248	0.249433	76
GO:0005635	cellular_component	nuclear envelope	177/22609	282/40888	1.13511	0.00644625	0.252902	177
GO:0090333	biological_process	regulation of stomatal closure	96/22609	146/40888	1.18914	0.00646829	0.252902	96
GO:0048585	biological_process	negative regulation of response to stimulus	372/22609	617/40888	1.09037	0.00650352	0.253192	372
GO:0006576	biological_process	cellular biogenic amine metabolic process	102/22609	156/40888	1.18247	0.00656249	0.253323	102
GO:0044106	biological_process	cellular amine metabolic process	102/22609	156/40888	1.18247	0.00656249	0.253323	102
GO:0042803	molecular_function	protein homodimerization activity	235/22609	381/40888	1.11547	0.00659393	0.253463	235
GO:0038023	molecular_function	signaling receptor activity	225/22609	364/40888	1.11788	0.00672153	0.257282	225
GO:0009646	biological_process	response to absence of light	58/22609	84/40888	1.24871	0.0069434	0.264086	58
GO:0005515	molecular_function	protein binding	3424/22609	6033/40888	1.0264	0.00699525	0.264086	3424
GO:0009641	biological_process	shade avoidance	14/22609	16/40888	1.58242	0.00704654	0.264086	14
GO:0014074	biological_process	response to purine-containing compound	14/22609	16/40888	1.58242	0.00704654	0.264086	14
GO:0009892	biological_process	negative regulation of metabolic process	816/22609	1394/40888	1.05862	0.00704983	0.264086	816
GO:0045926	biological_process	negative regulation of growth	53/22609	76/40888	1.26118	0.00707322	0.264086	53
GO:0009309	biological_process	amine biosynthetic process	80/22609	120/40888	1.20566	0.00730511	0.269544	80
GO:0042401	biological_process	cellular biogenic amine biosynthetic process	80/22609	120/40888	1.20566	0.00730511	0.269544	80
GO:0001228	molecular_function	DNA-binding transcription activator activity, RNA polymerase II-specific	34/22609	46/40888	1.33671	0.00730816	0.269544	34
GO:0033365	biological_process	protein localization to organelle	306/22609	504/40888	1.09801	0.00761792	0.279836	306
GO:0044030	biological_process	regulation of DNA methylation	32/22609	43/40888	1.34585	0.00775463	0.283713	32
GO:0051248	biological_process	negative regulation of protein metabolic process	95/22609	145/40888	1.18487	0.00781158	0.284654	95
GO:0090696	biological_process	post-embryonic plant organ development	184/22609	295/40888	1.128	0.00801327	0.29084	184
GO:0051173	biological_process	positive regulation of nitrogen compound metabolic process	650/22609	1104/40888	1.06478	0.00815878	0.294807	650
GO:0004473	molecular_function	malate dehydrogenase (decarboxylating) (NADP+) activity	30/22609	40/40888	1.35636	0.0081873	0.294807	30
GO:0006596	biological_process	polyamine biosynthetic process	49/22609	70/40888	1.26594	0.00841959	0.301978	49
GO:0000003	biological_process	reproduction	1777/22609	3098/40888	1.03734	0.00846263	0.302332	1777
GO:0004044	molecular_function	amidophosphoribosyltransferase activity	8/22609	8/40888	1.80848	0.00873461	0.303756	8
GO:0009819	biological_process	drought recovery	8/22609	8/40888	1.80848	0.00873461	0.303756	8
GO:0043076	cellular_component	megasporocyte nucleus	8/22609	8/40888	1.80848	0.00873461	0.303756	8
GO:0043078	cellular_component	polar nucleus	8/22609	8/40888	1.80848	0.00873461	0.303756	8
GO:0004030	molecular_function	aldehyde dehydrogenase [NAD(P)+] activity	11/22609	12/40888	1.65778	0.00873589	0.303756	11
GO:0050269	molecular_function	coniferyl-aldehyde dehydrogenase activity	11/22609	12/40888	1.65778	0.00873589	0.303756	11
GO:0071588	biological_process	hydrogen peroxide mediated signaling pathway	11/22609	12/40888	1.65778	0.00873589	0.303756	11
GO:0071669	biological_process	plant-type cell wall organization or biogenesis	234/22609	381/40888	1.11072	0.00880222	0.304898	234
GO:0016157	molecular_function	sucrose synthase activity	18/22609	22/40888	1.47967	0.00895578	0.306719	18
GO:0055062	biological_process	phosphate ion homeostasis	18/22609	22/40888	1.47967	0.00895578	0.306719	18
GO:0072506	biological_process	trivalent inorganic anion homeostasis	18/22609	22/40888	1.47967	0.00895578	0.306719	18
GO:0035437	biological_process	maintenance of protein localization in endoplasmic reticulum	24/22609	31/40888	1.40012	0.00920129	0.311613	24
GO:0047262	molecular_function	polygalacturonate 4-alpha-galacturonosyltransferase activity	24/22609	31/40888	1.40012	0.00920129	0.311613	24
GO:0072595	biological_process	maintenance of protein localization in organelle	24/22609	31/40888	1.40012	0.00920129	0.311613	24
GO:0004586	molecular_function	ornithine decarboxylase activity	20/22609	25/40888	1.44679	0.00928032	0.31197	20
GO:0033387	biological_process	putrescine biosynthetic process from ornithine	20/22609	25/40888	1.44679	0.00928032	0.31197	20
GO:0009642	biological_process	response to light intensity	131/22609	206/40888	1.15005	0.0094765	0.317393	131
GO:0042493	biological_process	response to drug	541/22609	915/40888	1.06928	0.00991759	0.33095	541
GO:0006595	biological_process	polyamine metabolic process	58/22609	85/40888	1.23402	0.0101709	0.338164	58
GO:0009593	biological_process	detection of chemical stimulus	31/22609	42/40888	1.33483	0.0106262	0.352017	31
GO:0045934	biological_process	negative regulation of nucleobase-containing compound metabolic process	282/22609	465/40888	1.09676	0.0108512	0.358167	282
GO:0022414	biological_process	reproductive process	1766/22609	3083/40888	1.03593	0.0109691	0.360752	1766
GO:0008381	molecular_function	mechanosensitive ion channel activity	13/22609	15/40888	1.56735	0.0112818	0.36706	13
GO:0035252	molecular_function	UDP-xylosyltransferase activity	13/22609	15/40888	1.56735	0.0112818	0.36706	13
GO:0061387	biological_process	regulation of extent of cell growth	13/22609	15/40888	1.56735	0.0112818	0.36706	13
GO:0005643	cellular_component	nuclear pore	70/22609	105/40888	1.20566	0.0115897	0.375737	70
GO:0051213	molecular_function	dioxygenase activity	147/22609	234/40888	1.1361	0.0116322	0.375778	147
GO:0016788	molecular_function	hydrolase activity, acting on ester bonds	1403/22609	2439/40888	1.0403	0.0117615	0.378011	1403
GO:0016143	biological_process	S-glycoside metabolic process	46/22609	66/40888	1.26046	0.0118673	0.378011	46
GO:0019757	biological_process	glycosinolate metabolic process	46/22609	66/40888	1.26046	0.0118673	0.378011	46
GO:0019760	biological_process	glucosinolate metabolic process	46/22609	66/40888	1.26046	0.0118673	0.378011	46
GO:0019239	molecular_function	deaminase activity	27/22609	36/40888	1.35636	0.0119711	0.379989	27
GO:0048869	biological_process	cellular developmental process	958/22609	1651/40888	1.04938	0.0120207	0.380237	958
GO:0034504	biological_process	protein localization to nucleus	91/22609	140/40888	1.17551	0.0123505	0.389318	91
GO:0009445	biological_process	putrescine metabolic process	25/22609	33/40888	1.37006	0.0125874	0.394059	25
GO:0009446	biological_process	putrescine biosynthetic process	25/22609	33/40888	1.37006	0.0125874	0.394059	25
GO:0016301	molecular_function	kinase activity	1742/22609	3043/40888	1.03529	0.01275	0.395188	1742
GO:0048587	biological_process	regulation of short-day photoperiodism, flowering	15/22609	18/40888	1.50707	0.0127536	0.395188	15
GO:0070919	biological_process	production of siRNA involved in chromatin silencing by small RNA	15/22609	18/40888	1.50707	0.0127536	0.395188	15
GO:0045892	biological_process	negative regulation of transcription, DNA-templated	246/22609	404/40888	1.10121	0.0128047	0.395426	246
GO:0031965	cellular_component	nuclear membrane	71/22609	107/40888	1.20002	0.0129618	0.398926	71
GO:0048579	biological_process	negative regulation of long-day photoperiodism, flowering	23/22609	30/40888	1.3865	0.0131166	0.402331	23
GO:0009673	molecular_function	low-affinity phosphate transmembrane transporter activity	17/22609	21/40888	1.46401	0.013465	0.405918	17
GO:0009228	biological_process	thiamine biosynthetic process	21/22609	27/40888	1.4066	0.0135009	0.405918	21
GO:0015853	biological_process	adenine transport	21/22609	27/40888	1.4066	0.0135009	0.405918	21
GO:0015854	biological_process	guanine transport	21/22609	27/40888	1.4066	0.0135009	0.405918	21
GO:0042724	biological_process	thiamine-containing compound biosynthetic process	21/22609	27/40888	1.4066	0.0135009	0.405918	21
GO:0045492	biological_process	xylan biosynthetic process	21/22609	27/40888	1.4066	0.0135009	0.405918	21
GO:0009965	biological_process	leaf morphogenesis	102/22609	159/40888	1.16016	0.0144269	0.428812	102
GO:0010628	biological_process	positive regulation of gene expression	528/22609	896/40888	1.06571	0.0145147	0.428812	528
GO:0005814	cellular_component	centriole	10/22609	11/40888	1.64408	0.0146077	0.428812	10
GO:0043112	biological_process	receptor metabolic process	10/22609	11/40888	1.64408	0.0146077	0.428812	10
GO:0090378	biological_process	seed trichome elongation	10/22609	11/40888	1.64408	0.0146077	0.428812	10
GO:1901528	biological_process	hydrogen peroxide mediated signaling pathway involved in stomatal movement	10/22609	11/40888	1.64408	0.0146077	0.428812	10
GO:1905897	biological_process	regulation of response to endoplasmic reticulum stress	10/22609	11/40888	1.64408	0.0146077	0.428812	10
GO:2000024	biological_process	regulation of leaf development	96/22609	149/40888	1.1652	0.0146389	0.428812	96
GO:0010604	biological_process	positive regulation of macromolecule metabolic process	681/22609	1165/40888	1.05715	0.0148039	0.432256	681
GO:0017038	biological_process	protein import	158/22609	254/40888	1.12496	0.0150265	0.437353	158
GO:0042973	molecular_function	glucan endo-1,3-beta-D-glucosidase activity	28/22609	38/40888	1.33257	0.015506	0.438247	28
GO:0033692	biological_process	cellular polysaccharide biosynthetic process	211/22609	345/40888	1.10606	0.0155973	0.438247	211
GO:0071395	biological_process	cellular response to jasmonic acid stimulus	103/22609	161/40888	1.15698	0.0156014	0.438247	103
GO:0004572	molecular_function	mannosyl-oligosaccharide 1,3-1,6-alpha-mannosidase activity	7/22609	7/40888	1.80848	0.0157986	0.438247	7
GO:0004715	molecular_function	non-membrane spanning protein tyrosine kinase activity	7/22609	7/40888	1.80848	0.0157986	0.438247	7
GO:0009903	biological_process	chloroplast avoidance movement	7/22609	7/40888	1.80848	0.0157986	0.438247	7
GO:0010031	biological_process	circumnutation	7/22609	7/40888	1.80848	0.0157986	0.438247	7
GO:0034247	biological_process	snoRNA splicing	7/22609	7/40888	1.80848	0.0157986	0.438247	7
GO:0045806	biological_process	negative regulation of endocytosis	7/22609	7/40888	1.80848	0.0157986	0.438247	7
GO:0048261	biological_process	negative regulation of receptor-mediated endocytosis	7/22609	7/40888	1.80848	0.0157986	0.438247	7
GO:0050879	biological_process	multicellular organismal movement	7/22609	7/40888	1.80848	0.0157986	0.438247	7
GO:0071260	biological_process	cellular response to mechanical stimulus	7/22609	7/40888	1.80848	0.0157986	0.438247	7
GO:0090307	biological_process	mitotic spindle assembly	7/22609	7/40888	1.80848	0.0157986	0.438247	7
GO:1900186	biological_process	negative regulation of clathrin-dependent endocytosis	7/22609	7/40888	1.80848	0.0157986	0.438247	7
GO:0051235	biological_process	maintenance of location	70/22609	106/40888	1.19428	0.0158428	0.438247	70
GO:0046658	cellular_component	anchored component of plasma membrane	97/22609	151/40888	1.16174	0.0158865	0.438247	97
GO:0000272	biological_process	polysaccharide catabolic process	129/22609	205/40888	1.13802	0.015978	0.438247	129
GO:1901698	biological_process	response to nitrogen compound	424/22609	715/40888	1.07244	0.0161368	0.438247	424
GO:0051170	biological_process	import into nucleus	88/22609	136/40888	1.1702	0.0161632	0.438247	88
GO:0006935	biological_process	chemotaxis	48/22609	70/40888	1.2401	0.0161637	0.438247	48
GO:0010183	biological_process	pollen tube guidance	48/22609	70/40888	1.2401	0.0161637	0.438247	48
GO:0042330	biological_process	taxis	48/22609	70/40888	1.2401	0.0161637	0.438247	48
GO:0050918	biological_process	positive chemotaxis	48/22609	70/40888	1.2401	0.0161637	0.438247	48
GO:0010243	biological_process	response to organonitrogen compound	339/22609	567/40888	1.08126	0.0165512	0.447424	339
GO:0006282	biological_process	regulation of DNA repair	33/22609	46/40888	1.29739	0.0166376	0.448428	33
GO:0006591	biological_process	ornithine metabolic process	38/22609	54/40888	1.27264	0.0169418	0.455279	38
GO:0010605	biological_process	negative regulation of macromolecule metabolic process	743/22609	1276/40888	1.05306	0.0171417	0.459296	743
GO:0010075	biological_process	regulation of meristem growth	54/22609	80/40888	1.22073	0.0175745	0.467144	54
GO:0005088	molecular_function	Ras guanyl-nucleotide exchange factor activity	24/22609	32/40888	1.35636	0.0175884	0.467144	24
GO:0010363	biological_process	regulation of plant-type hypersensitive response	24/22609	32/40888	1.35636	0.0175884	0.467144	24
GO:0016814	molecular_function	hydrolase activity, acting on carbon-nitrogen (but not peptide) bonds, in cyclic amidines	46/22609	67/40888	1.24165	0.0177469	0.469985	46
GO:1901474	molecular_function	azole transmembrane transporter activity	12/22609	14/40888	1.55013	0.0179209	0.473216	12
GO:0004519	molecular_function	endonuclease activity	700/22609	1201/40888	1.05407	0.0183273	0.482549	700
GO:0001653	molecular_function	peptide receptor activity	22/22609	29/40888	1.37195	0.0185465	0.482739	22
GO:0004127	molecular_function	cytidylate kinase activity	22/22609	29/40888	1.37195	0.0185465	0.482739	22
GO:0006621	biological_process	protein retention in ER lumen	22/22609	29/40888	1.37195	0.0185465	0.482739	22
GO:0071541	cellular_component	eukaryotic translation initiation factor 3 complex, eIF3m	22/22609	29/40888	1.37195	0.0185465	0.482739	22
GO:0016893	molecular_function	endonuclease activity, active with either ribo- or deoxyribonucleic acids and producing 5'-phosphomonoesters	49/22609	72/40888	1.23077	0.01861	0.483012	49
GO:0090698	biological_process	post-embryonic plant morphogenesis	173/22609	281/40888	1.11341	0.0192121	0.488926	173
GO:0048024	biological_process	regulation of mRNA splicing, via spliceosome	69/22609	105/40888	1.18843	0.0192851	0.488926	69
GO:0055088	biological_process	lipid homeostasis	69/22609	105/40888	1.18843	0.0192851	0.488926	69
GO:0009579	cellular_component	thylakoid	383/22609	645/40888	1.07387	0.0192878	0.488926	383
GO:0071782	cellular_component	endoplasmic reticulum tubular network	20/22609	26/40888	1.39114	0.0193615	0.488926	20
GO:0098827	cellular_component	endoplasmic reticulum subcompartment	20/22609	26/40888	1.39114	0.0193615	0.488926	20
GO:0016324	cellular_component	apical plasma membrane	44/22609	64/40888	1.24333	0.019491	0.488926	44
GO:0004605	molecular_function	phosphatidate cytidylyltransferase activity	14/22609	17/40888	1.48934	0.0195342	0.488926	14
GO:0015288	molecular_function	porin activity	14/22609	17/40888	1.48934	0.0195342	0.488926	14
GO:0022829	molecular_function	wide pore channel activity	14/22609	17/40888	1.48934	0.0195342	0.488926	14
GO:0030242	biological_process	autophagy of peroxisome	14/22609	17/40888	1.48934	0.0195342	0.488926	14
GO:0006072	biological_process	glycerol-3-phosphate metabolic process	29/22609	40/40888	1.31115	0.0195356	0.488926	29
GO:0052646	biological_process	alditol phosphate metabolic process	29/22609	40/40888	1.31115	0.0195356	0.488926	29
GO:0015698	biological_process	inorganic anion transport	129/22609	206/40888	1.1325	0.0196615	0.49073	129
GO:0072505	biological_process	divalent inorganic anion homeostasis	18/22609	23/40888	1.41533	0.0199243	0.492238	18
GO:0072686	cellular_component	mitotic spindle	18/22609	23/40888	1.41533	0.0199243	0.492238	18
GO:0004650	molecular_function	polygalacturonase activity	16/22609	20/40888	1.44679	0.0200679	0.492238	16
GO:0009625	biological_process	response to insect	16/22609	20/40888	1.44679	0.0200679	0.492238	16
GO:0009938	biological_process	negative regulation of gibberellic acid mediated signaling pathway	16/22609	20/40888	1.44679	0.0200679	0.492238	16
GO:0016891	molecular_function	endoribonuclease activity, producing 5'-phosphomonoesters	39/22609	56/40888	1.25948	0.0200898	0.492238	39
GO:0015368	molecular_function	calcium:cation antiporter activity	34/22609	48/40888	1.28101	0.0202082	0.492238	34
GO:0015369	molecular_function	calcium:proton antiporter activity	34/22609	48/40888	1.28101	0.0202082	0.492238	34
GO:0051051	biological_process	negative regulation of transport	34/22609	48/40888	1.28101	0.0202082	0.492238	34
GO:0051259	biological_process	protein complex oligomerization	91/22609	142/40888	1.15896	0.0207258	0.503499	91
GO:0008374	molecular_function	O-acyltransferase activity	107/22609	169/40888	1.14502	0.0209149	0.506742	107
GO:0000911	biological_process	cytokinesis by cell plate formation	85/22609	132/40888	1.16455	0.0210733	0.509226	85
GO:0008134	molecular_function	transcription factor binding	98/22609	154/40888	1.15085	0.0218543	0.526353	98
GO:0071446	biological_process	cellular response to salicylic acid stimulus	53/22609	79/40888	1.21329	0.0218977	0.526353	53
GO:0016310	biological_process	phosphorylation	1311/22609	2286/40888	1.03715	0.0220241	0.527998	1311
GO:0061077	biological_process	chaperone-mediated protein folding	223/22609	368/40888	1.0959	0.0222375	0.531716	223
GO:0043424	molecular_function	protein histidine kinase binding	56/22609	84/40888	1.20566	0.0224037	0.534287	56
GO:0000138	cellular_component	Golgi trans cisterna	83/22609	129/40888	1.1636	0.0230609	0.547112	83
GO:0031985	cellular_component	Golgi cisterna	195/22609	320/40888	1.10204	0.0233479	0.547112	195
GO:0004470	molecular_function	malic enzyme activity	48/22609	71/40888	1.22264	0.0233924	0.547112	48
GO:0004471	molecular_function	malate dehydrogenase (decarboxylating) (NAD+) activity	48/22609	71/40888	1.22264	0.0233924	0.547112	48
GO:0051139	molecular_function	metal ion:proton antiporter activity	48/22609	71/40888	1.22264	0.0233924	0.547112	48
GO:0005102	molecular_function	signaling receptor binding	71/22609	109/40888	1.178	0.0234207	0.547112	71
GO:0080134	biological_process	regulation of response to stress	479/22609	815/40888	1.0629	0.0235259	0.547112	479
GO:0008320	molecular_function	protein transmembrane transporter activity	30/22609	42/40888	1.29177	0.024046	0.547112	30
GO:0022884	molecular_function	macromolecule transmembrane transporter activity	30/22609	42/40888	1.29177	0.024046	0.547112	30
GO:0140318	molecular_function	protein transporter activity	30/22609	42/40888	1.29177	0.024046	0.547112	30
GO:0048364	biological_process	root development	651/22609	1118/40888	1.05306	0.0242152	0.547112	651
GO:0000221	cellular_component	vacuolar proton-transporting V-type ATPase, V1 domain	9/22609	10/40888	1.62764	0.0242627	0.547112	9
GO:0010239	biological_process	chloroplast mRNA processing	9/22609	10/40888	1.62764	0.0242627	0.547112	9
GO:0010581	biological_process	regulation of starch biosynthetic process	9/22609	10/40888	1.62764	0.0242627	0.547112	9
GO:0032794	molecular_function	GTPase activating protein binding	9/22609	10/40888	1.62764	0.0242627	0.547112	9
GO:0043981	biological_process	histone H4-K5 acetylation	9/22609	10/40888	1.62764	0.0242627	0.547112	9
GO:0045596	biological_process	negative regulation of cell differentiation	9/22609	10/40888	1.62764	0.0242627	0.547112	9
GO:0046923	molecular_function	ER retention sequence binding	9/22609	10/40888	1.62764	0.0242627	0.547112	9
GO:0048259	biological_process	regulation of receptor-mediated endocytosis	9/22609	10/40888	1.62764	0.0242627	0.547112	9
GO:0048759	biological_process	xylem vessel member cell differentiation	9/22609	10/40888	1.62764	0.0242627	0.547112	9
GO:0051055	biological_process	negative regulation of lipid biosynthetic process	9/22609	10/40888	1.62764	0.0242627	0.547112	9
GO:2000369	biological_process	regulation of clathrin-dependent endocytosis	9/22609	10/40888	1.62764	0.0242627	0.547112	9
GO:0050821	biological_process	protein stabilization	90/22609	141/40888	1.15435	0.0244744	0.550523	90
GO:0051128	biological_process	regulation of cellular component organization	631/22609	1083/40888	1.0537	0.0247516	0.555387	631
GO:0000160	biological_process	phosphorelay signal transduction system	237/22609	393/40888	1.09061	0.0248406	0.556015	237
GO:0045786	biological_process	negative regulation of cell cycle	57/22609	86/40888	1.19865	0.025072	0.559817	57
GO:0009826	biological_process	unidimensional cell growth	349/22609	588/40888	1.0734	0.0251745	0.560733	349
GO:0004521	molecular_function	endoribonuclease activity	78/22609	121/40888	1.1658	0.0254279	0.560912	78
GO:0009787	biological_process	regulation of abscisic acid-activated signaling pathway	197/22609	324/40888	1.0996	0.0254288	0.560912	197
GO:1901419	biological_process	regulation of response to alcohol	197/22609	324/40888	1.0996	0.0254288	0.560912	197
GO:1905957	biological_process	regulation of cellular response to alcohol	197/22609	324/40888	1.0996	0.0254288	0.560912	197
GO:2000242	biological_process	negative regulation of reproductive process	75/22609	116/40888	1.16928	0.0255727	0.562724	75
GO:0009986	cellular_component	cell surface	72/22609	111/40888	1.17307	0.0256676	0.563451	72
GO:0043412	biological_process	macromolecule modification	2727/22609	4817/40888	1.02382	0.0259937	0.56695	2727
GO:0051784	biological_process	negative regulation of nuclear division	21/22609	28/40888	1.35636	0.0259977	0.56695	21
GO:0009699	biological_process	phenylpropanoid biosynthetic process	127/22609	204/40888	1.12587	0.0260138	0.56695	127
GO:0006535	biological_process	cysteine biosynthetic process from serine	28/22609	39/40888	1.2984	0.0261916	0.569465	28
GO:0048449	biological_process	floral organ formation	33/22609	47/40888	1.26979	0.0264727	0.569621	33
GO:0046873	molecular_function	metal ion transmembrane transporter activity	363/22609	613/40888	1.07093	0.0267112	0.569621	363
GO:0006606	biological_process	protein import into nucleus	85/22609	133/40888	1.1558	0.027064	0.569621	85
GO:0009888	biological_process	tissue development	721/22609	1243/40888	1.04901	0.0270857	0.569621	721
GO:0005451	molecular_function	monovalent cation:proton antiporter activity	52/22609	78/40888	1.20566	0.0271449	0.569621	52
GO:0009534	cellular_component	chloroplast thylakoid	332/22609	559/40888	1.07409	0.0272049	0.569621	332
GO:0031976	cellular_component	plastid thylakoid	332/22609	559/40888	1.07409	0.0272049	0.569621	332
GO:0031977	cellular_component	thylakoid lumen	41/22609	60/40888	1.2358	0.0272615	0.569621	41
GO:0022622	biological_process	root system development	653/22609	1123/40888	1.05159	0.0272707	0.569621	653
GO:0044448	cellular_component	cell cortex part	82/22609	128/40888	1.15856	0.0273636	0.569621	82
GO:0009041	molecular_function	uridylate kinase activity	19/22609	25/40888	1.37445	0.0275162	0.569621	19
GO:0010962	biological_process	regulation of glucan biosynthetic process	19/22609	25/40888	1.37445	0.0275162	0.569621	19
GO:0050801	biological_process	ion homeostasis	421/22609	715/40888	1.06486	0.0279476	0.569621	421
GO:0000381	biological_process	regulation of alternative mRNA splicing, via spliceosome	61/22609	93/40888	1.18621	0.0281074	0.569621	61
GO:0009902	biological_process	chloroplast relocation	11/22609	13/40888	1.53026	0.0282139	0.569621	11
GO:0019750	biological_process	chloroplast localization	11/22609	13/40888	1.53026	0.0282139	0.569621	11
GO:0051644	biological_process	plastid localization	11/22609	13/40888	1.53026	0.0282139	0.569621	11
GO:0051667	biological_process	establishment of plastid localization	11/22609	13/40888	1.53026	0.0282139	0.569621	11
GO:0071249	biological_process	cellular response to nitrate	11/22609	13/40888	1.53026	0.0282139	0.569621	11
GO:0048015	biological_process	phosphatidylinositol-mediated signaling	36/22609	52/40888	1.25203	0.0284453	0.569621	36
GO:0030599	molecular_function	pectinesterase activity	26/22609	36/40888	1.30613	0.0284877	0.569621	26
GO:0045330	molecular_function	aspartyl esterase activity	26/22609	36/40888	1.30613	0.0284877	0.569621	26
GO:0003373	biological_process	dynamin family protein polymerization involved in membrane fission	6/22609	6/40888	1.80848	0.0285749	0.569621	6
GO:0003374	biological_process	dynamin family protein polymerization involved in mitochondrial fission	6/22609	6/40888	1.80848	0.0285749	0.569621	6
GO:0006666	biological_process	3-keto-sphinganine metabolic process	6/22609	6/40888	1.80848	0.0285749	0.569621	6
GO:0015633	molecular_function	ATPase-coupled zinc transmembrane transporter activity	6/22609	6/40888	1.80848	0.0285749	0.569621	6
GO:0016463	molecular_function	zinc transmembrane transporter activity, phosphorylative mechanism	6/22609	6/40888	1.80848	0.0285749	0.569621	6
GO:0030424	cellular_component	axon	6/22609	6/40888	1.80848	0.0285749	0.569621	6
GO:0030574	biological_process	collagen catabolic process	6/22609	6/40888	1.80848	0.0285749	0.569621	6
GO:0031623	biological_process	receptor internalization	6/22609	6/40888	1.80848	0.0285749	0.569621	6
GO:0032963	biological_process	collagen metabolic process	6/22609	6/40888	1.80848	0.0285749	0.569621	6
GO:0042721	cellular_component	TIM22 mitochondrial import inner membrane insertion complex	6/22609	6/40888	1.80848	0.0285749	0.569621	6
GO:0043005	cellular_component	neuron projection	6/22609	6/40888	1.80848	0.0285749	0.569621	6
GO:0045056	biological_process	transcytosis	6/22609	6/40888	1.80848	0.0285749	0.569621	6
GO:0047560	molecular_function	3-dehydrosphinganine reductase activity	6/22609	6/40888	1.80848	0.0285749	0.569621	6
GO:0050803	biological_process	regulation of synapse structure or activity	6/22609	6/40888	1.80848	0.0285749	0.569621	6
GO:0090148	biological_process	membrane fission	6/22609	6/40888	1.80848	0.0285749	0.569621	6
GO:0097458	cellular_component	neuron part	6/22609	6/40888	1.80848	0.0285749	0.569621	6
GO:0008970	molecular_function	phospholipase A1 activity	17/22609	22/40888	1.39746	0.0287965	0.570295	17
GO:0048280	biological_process	vesicle fusion with Golgi apparatus	17/22609	22/40888	1.39746	0.0287965	0.570295	17
GO:0050829	biological_process	defense response to Gram-negative bacterium	17/22609	22/40888	1.39746	0.0287965	0.570295	17
GO:0007623	biological_process	circadian rhythm	136/22609	220/40888	1.11797	0.0292915	0.576857	136
GO:0009628	biological_process	response to abiotic stimulus	2291/22609	4040/40888	1.02555	0.0295515	0.576857	2291
GO:0006353	biological_process	DNA-templated transcription, termination	15/22609	19/40888	1.42775	0.0296225	0.576857	15
GO:0007231	biological_process	osmosensory signaling pathway	15/22609	19/40888	1.42775	0.0296225	0.576857	15
GO:0010369	cellular_component	chromocenter	15/22609	19/40888	1.42775	0.0296225	0.576857	15
GO:0016673	molecular_function	oxidoreductase activity, acting on a sulfur group of donors, iron-sulfur protein as acceptor	15/22609	19/40888	1.42775	0.0296225	0.576857	15
GO:0034051	biological_process	negative regulation of plant-type hypersensitive response	13/22609	16/40888	1.46939	0.0296343	0.576857	13
GO:0046930	cellular_component	pore complex	13/22609	16/40888	1.46939	0.0296343	0.576857	13
GO:0004675	molecular_function	transmembrane receptor protein serine/threonine kinase activity	50/22609	75/40888	1.20566	0.0299019	0.580823	50
GO:0035967	biological_process	cellular response to topologically incorrect protein	254/22609	424/40888	1.08338	0.0303529	0.583274	254
GO:0017148	biological_process	negative regulation of translation	53/22609	80/40888	1.19812	0.0303839	0.583274	53
GO:0034249	biological_process	negative regulation of cellular amide metabolic process	53/22609	80/40888	1.19812	0.0303839	0.583274	53
GO:0034620	biological_process	cellular response to unfolded protein	209/22609	346/40888	1.09241	0.0306481	0.583274	209
GO:0009404	biological_process	toxin metabolic process	56/22609	85/40888	1.19147	0.0307133	0.583274	56
GO:0048528	biological_process	post-embryonic root development	130/22609	210/40888	1.11954	0.0307503	0.583274	130
GO:0009308	biological_process	amine metabolic process	144/22609	234/40888	1.11291	0.0308849	0.583274	144
GO:0043067	biological_process	regulation of programmed cell death	144/22609	234/40888	1.11291	0.0308849	0.583274	144
GO:0044436	cellular_component	thylakoid part	301/22609	506/40888	1.0758	0.0309007	0.583274	301
GO:0006558	biological_process	L-phenylalanine metabolic process	59/22609	90/40888	1.18556	0.030912	0.583274	59
GO:1902221	biological_process	erythrose 4-phosphate/phosphoenolpyruvate family amino acid metabolic process	59/22609	90/40888	1.18556	0.030912	0.583274	59
GO:0006772	biological_process	thiamine metabolic process	24/22609	33/40888	1.31526	0.0309244	0.583274	24
GO:0015175	molecular_function	neutral amino acid transmembrane transporter activity	24/22609	33/40888	1.31526	0.0309244	0.583274	24
GO:0042723	biological_process	thiamine-containing compound metabolic process	24/22609	33/40888	1.31526	0.0309244	0.583274	24
GO:0006458	biological_process	'de novo' protein folding	191/22609	315/40888	1.09657	0.0312427	0.585908	191
GO:0000779	cellular_component	condensed chromosome, centromeric region	34/22609	49/40888	1.25487	0.0312897	0.585908	34
GO:0009608	biological_process	response to symbiont	34/22609	49/40888	1.25487	0.0312897	0.585908	34
GO:0005509	molecular_function	calcium ion binding	377/22609	639/40888	1.06698	0.0313213	0.585908	377
GO:0019899	molecular_function	enzyme binding	695/22609	1199/40888	1.04829	0.031397	0.58612	695
GO:0048584	biological_process	positive regulation of response to stimulus	302/22609	508/40888	1.07512	0.0318355	0.593091	302
GO:0048527	biological_process	lateral root development	117/22609	188/40888	1.12549	0.0319533	0.59407	117
GO:0009867	biological_process	jasmonic acid mediated signaling pathway	97/22609	154/40888	1.13911	0.0320313	0.594309	97
GO:0009863	biological_process	salicylic acid mediated signaling pathway	45/22609	67/40888	1.21465	0.032236	0.59689	45
GO:0004540	molecular_function	ribonuclease activity	131/22609	212/40888	1.11751	0.0324384	0.59942	131
GO:0010629	biological_process	negative regulation of gene expression	663/22609	1143/40888	1.04902	0.0327499	0.603951	663
GO:0030001	biological_process	metal ion transport	315/22609	531/40888	1.07283	0.0329542	0.606491	315
GO:0034637	biological_process	cellular carbohydrate biosynthetic process	253/22609	423/40888	1.08167	0.0333614	0.611849	253
GO:0051606	biological_process	detection of stimulus	111/22609	178/40888	1.12776	0.0334292	0.611849	111
GO:0045995	biological_process	regulation of embryonic development	72/22609	112/40888	1.1626	0.0334469	0.611849	72
GO:0098590	cellular_component	plasma membrane region	57/22609	87/40888	1.18487	0.0340108	0.620282	57
GO:0009816	biological_process	defense response to bacterium, incompatible interaction	63/22609	97/40888	1.17458	0.034044	0.620282	63
GO:0009658	biological_process	chloroplast organization	164/22609	269/40888	1.10257	0.0342349	0.622212	164
GO:0000145	cellular_component	exocyst	32/22609	46/40888	1.25808	0.0344294	0.622212	32
GO:0008061	molecular_function	chitin binding	32/22609	46/40888	1.25808	0.0344294	0.622212	32
GO:1900426	biological_process	positive regulation of defense response to bacterium	32/22609	46/40888	1.25808	0.0344294	0.622212	32
GO:0005262	molecular_function	calcium channel activity	40/22609	59/40888	1.22609	0.0344915	0.622212	40
GO:0051084	biological_process	'de novo' posttranslational protein folding	190/22609	314/40888	1.09431	0.0348105	0.624715	190
GO:0051085	biological_process	chaperone cofactor-dependent protein refolding	190/22609	314/40888	1.09431	0.0348105	0.624715	190
GO:0016553	biological_process	base conversion or substitution editing	27/22609	38/40888	1.28498	0.0348359	0.624715	27
GO:0071229	biological_process	cellular response to acid chemical	594/22609	1022/40888	1.05111	0.0350404	0.627148	594
GO:0010941	biological_process	regulation of cell death	172/22609	283/40888	1.09915	0.0353479	0.631411	172
GO:0008361	biological_process	regulation of cell size	46/22609	69/40888	1.20566	0.0363461	0.647971	46
GO:0009753	biological_process	response to jasmonic acid	184/22609	304/40888	1.09461	0.0368042	0.654855	184
GO:0072594	biological_process	establishment of protein localization to organelle	264/22609	443/40888	1.07774	0.037045	0.65698	264
GO:0010228	biological_process	vegetative to reproductive phase transition of meristem	188/22609	311/40888	1.09323	0.0372371	0.65698	188
GO:0071407	biological_process	cellular response to organic cyclic compound	188/22609	311/40888	1.09323	0.0372371	0.65698	188
GO:0009504	cellular_component	cell plate	52/22609	79/40888	1.19039	0.0372506	0.65698	52
GO:0065009	biological_process	regulation of molecular function	253/22609	424/40888	1.07912	0.0378125	0.65698	253
GO:0044264	biological_process	cellular polysaccharide metabolic process	304/22609	513/40888	1.07169	0.0378138	0.65698	304
GO:0097305	biological_process	response to alcohol	719/22609	1244/40888	1.04526	0.0378463	0.65698	719
GO:0010483	biological_process	pollen tube reception	30/22609	43/40888	1.26173	0.0378957	0.65698	30
GO:0051703	biological_process	intraspecies interaction between organisms	30/22609	43/40888	1.26173	0.0378957	0.65698	30
GO:1902288	biological_process	regulation of defense response to oomycetes	30/22609	43/40888	1.26173	0.0378957	0.65698	30
GO:0051701	biological_process	interaction with host	38/22609	56/40888	1.22719	0.0380658	0.65698	38
GO:0009737	biological_process	response to abscisic acid	689/22609	1191/40888	1.04622	0.0381066	0.65698	689
GO:0004518	molecular_function	nuclease activity	785/22609	1361/40888	1.0431	0.0381133	0.65698	785
GO:0043087	biological_process	regulation of GTPase activity	25/22609	35/40888	1.29177	0.0381372	0.65698	25
GO:0043547	biological_process	positive regulation of GTPase activity	25/22609	35/40888	1.29177	0.0381372	0.65698	25
GO:0016740	molecular_function	transferase activity	4790/22609	8531/40888	1.01543	0.0383563	0.65698	4790
GO:0048284	biological_process	organelle fusion	110/22609	177/40888	1.12392	0.0384323	0.65698	110
GO:0009657	biological_process	plastid organization	219/22609	365/40888	1.08509	0.0385327	0.65698	219
GO:0000494	biological_process	box C/D snoRNA 3'-end processing	18/22609	24/40888	1.35636	0.0387265	0.65698	18
GO:0010359	biological_process	regulation of anion channel activity	18/22609	24/40888	1.35636	0.0387265	0.65698	18
GO:0033967	biological_process	box C/D snoRNA metabolic process	18/22609	24/40888	1.35636	0.0387265	0.65698	18
GO:0034963	biological_process	box C/D snoRNA processing	18/22609	24/40888	1.35636	0.0387265	0.65698	18
GO:0036009	molecular_function	protein-glutamine N-methyltransferase activity	18/22609	24/40888	1.35636	0.0387265	0.65698	18
GO:1990258	biological_process	histone glutamine methylation	18/22609	24/40888	1.35636	0.0387265	0.65698	18
GO:1990259	molecular_function	histone-glutamine methyltransferase activity	18/22609	24/40888	1.35636	0.0387265	0.65698	18
GO:0006534	biological_process	cysteine metabolic process	74/22609	116/40888	1.15369	0.0392366	0.66436	74
GO:0003942	molecular_function	N-acetyl-gamma-glutamyl-phosphate reductase activity	8/22609	9/40888	1.60754	0.0399792	0.66436	8
GO:0005290	molecular_function	L-histidine transmembrane transporter activity	8/22609	9/40888	1.60754	0.0399792	0.66436	8
GO:0009643	biological_process	photosynthetic acclimation	8/22609	9/40888	1.60754	0.0399792	0.66436	8
GO:0015173	molecular_function	aromatic amino acid transmembrane transporter activity	8/22609	9/40888	1.60754	0.0399792	0.66436	8
GO:0016618	molecular_function	hydroxypyruvate reductase activity	8/22609	9/40888	1.60754	0.0399792	0.66436	8
GO:0031379	cellular_component	RNA-directed RNA polymerase complex	8/22609	9/40888	1.60754	0.0399792	0.66436	8
GO:0031380	cellular_component	nuclear RNA-directed RNA polymerase complex	8/22609	9/40888	1.60754	0.0399792	0.66436	8
GO:0048455	biological_process	stamen formation	8/22609	9/40888	1.60754	0.0399792	0.66436	8
GO:0097264	biological_process	self proteolysis	8/22609	9/40888	1.60754	0.0399792	0.66436	8
GO:0010073	biological_process	meristem maintenance	175/22609	289/40888	1.0951	0.0400245	0.66436	175
GO:0031146	biological_process	SCF-dependent proteasomal ubiquitin-dependent protein catabolic process	44/22609	66/40888	1.20566	0.0401095	0.66436	44
GO:0080050	biological_process	regulation of seed development	44/22609	66/40888	1.20566	0.0401095	0.66436	44
GO:0098687	cellular_component	chromosomal region	84/22609	133/40888	1.1422	0.0402248	0.665059	84
GO:0019344	biological_process	cysteine biosynthetic process	65/22609	101/40888	1.16388	0.0405876	0.668631	65
GO:0042393	molecular_function	histone binding	111/22609	179/40888	1.12146	0.0406671	0.668631	111
GO:0010051	biological_process	xylem and phloem pattern formation	81/22609	128/40888	1.14443	0.0409458	0.668631	81
GO:1902275	biological_process	regulation of chromatin organization	81/22609	128/40888	1.14443	0.0409458	0.668631	81
GO:0009908	biological_process	flower development	471/22609	807/40888	1.05551	0.0410743	0.668631	471
GO:0009088	biological_process	threonine biosynthetic process	16/22609	21/40888	1.37789	0.041197	0.668631	16
GO:0017056	molecular_function	structural constituent of nuclear pore	16/22609	21/40888	1.37789	0.041197	0.668631	16
GO:0046683	biological_process	response to organophosphorus	16/22609	21/40888	1.37789	0.041197	0.668631	16
GO:0044036	biological_process	cell wall macromolecule metabolic process	108/22609	174/40888	1.12251	0.041665	0.668631	108
GO:0015112	molecular_function	nitrate transmembrane transporter activity	23/22609	32/40888	1.29985	0.041712	0.668631	23
GO:0017004	biological_process	cytochrome complex assembly	23/22609	32/40888	1.29985	0.041712	0.668631	23
GO:0000776	cellular_component	kinetochore	28/22609	40/40888	1.26594	0.0417224	0.668631	28
GO:0035838	cellular_component	growing cell tip	36/22609	53/40888	1.2284	0.0420406	0.668631	36
GO:0051286	cellular_component	cell tip	36/22609	53/40888	1.2284	0.0420406	0.668631	36
GO:0090404	cellular_component	pollen tube tip	36/22609	53/40888	1.2284	0.0420406	0.668631	36
GO:0034357	cellular_component	photosynthetic membrane	280/22609	472/40888	1.07283	0.0420673	0.668631	280
GO:0004674	molecular_function	protein serine/threonine kinase activity	1064/22609	1858/40888	1.03564	0.0421103	0.668631	1064
GO:0009808	biological_process	lignin metabolic process	88/22609	140/40888	1.13676	0.0422106	0.668631	88
GO:0005938	cellular_component	cell cortex	169/22609	279/40888	1.09546	0.0423365	0.668631	169
GO:0016747	molecular_function	transferase activity, transferring acyl groups other than amino-acyl groups	402/22609	686/40888	1.05978	0.0426749	0.668631	402
GO:0090567	biological_process	reproductive shoot system development	486/22609	834/40888	1.05386	0.043137	0.668631	486
GO:0000289	biological_process	nuclear-transcribed mRNA poly(A) tail shortening	14/22609	18/40888	1.4066	0.0432662	0.668631	14
GO:0006517	biological_process	protein deglycosylation	14/22609	18/40888	1.4066	0.0432662	0.668631	14
GO:0019418	biological_process	sulfide oxidation	14/22609	18/40888	1.4066	0.0432662	0.668631	14
GO:0019424	biological_process	sulfide oxidation, using siroheme sulfite reductase	14/22609	18/40888	1.4066	0.0432662	0.668631	14
GO:0031114	biological_process	regulation of microtubule depolymerization	14/22609	18/40888	1.4066	0.0432662	0.668631	14
GO:0034271	cellular_component	phosphatidylinositol 3-kinase complex, class III, type I	14/22609	18/40888	1.4066	0.0432662	0.668631	14
GO:0034272	cellular_component	phosphatidylinositol 3-kinase complex, class III, type II	14/22609	18/40888	1.4066	0.0432662	0.668631	14
GO:0050311	molecular_function	sulfite reductase (ferredoxin) activity	14/22609	18/40888	1.4066	0.0432662	0.668631	14
GO:1901371	biological_process	regulation of leaf morphogenesis	14/22609	18/40888	1.4066	0.0432662	0.668631	14
GO:0015267	molecular_function	channel activity	166/22609	274/40888	1.09565	0.0435454	0.668631	166
GO:0022803	molecular_function	passive transmembrane transporter activity	166/22609	274/40888	1.09565	0.0435454	0.668631	166
GO:0080167	biological_process	response to karrikin	82/22609	130/40888	1.14074	0.0438948	0.668631	82
GO:0000026	molecular_function	alpha-1,2-mannosyltransferase activity	10/22609	12/40888	1.50707	0.0439669	0.668631	10
GO:0000454	biological_process	snoRNA guided rRNA pseudouridine synthesis	10/22609	12/40888	1.50707	0.0439669	0.668631	10
GO:0003849	molecular_function	3-deoxy-7-phosphoheptulonate synthase activity	10/22609	12/40888	1.50707	0.0439669	0.668631	10
GO:0004366	molecular_function	glycerol-3-phosphate O-acyltransferase activity	10/22609	12/40888	1.50707	0.0439669	0.668631	10
GO:0009800	biological_process	cinnamic acid biosynthetic process	10/22609	12/40888	1.50707	0.0439669	0.668631	10
GO:0009803	biological_process	cinnamic acid metabolic process	10/22609	12/40888	1.50707	0.0439669	0.668631	10
GO:0035652	biological_process	clathrin-coated vesicle cargo loading	10/22609	12/40888	1.50707	0.0439669	0.668631	10
GO:0045039	biological_process	protein insertion into mitochondrial inner membrane	10/22609	12/40888	1.50707	0.0439669	0.668631	10
GO:0045548	molecular_function	phenylalanine ammonia-lyase activity	10/22609	12/40888	1.50707	0.0439669	0.668631	10
GO:0048446	biological_process	petal morphogenesis	10/22609	12/40888	1.50707	0.0439669	0.668631	10
GO:0048577	biological_process	negative regulation of short-day photoperiodism, flowering	10/22609	12/40888	1.50707	0.0439669	0.668631	10
GO:0050378	molecular_function	UDP-glucuronate 4-epimerase activity	10/22609	12/40888	1.50707	0.0439669	0.668631	10
GO:0102420	molecular_function	sn-1-glycerol-3-phosphate C16:0-DCA-CoA acyl transferase activity	10/22609	12/40888	1.50707	0.0439669	0.668631	10
GO:0008509	molecular_function	anion transmembrane transporter activity	338/22609	574/40888	1.06493	0.0442663	0.668631	338
GO:0010015	biological_process	root morphogenesis	338/22609	574/40888	1.06493	0.0442663	0.668631	338
GO:0051345	biological_process	positive regulation of hydrolase activity	31/22609	45/40888	1.24584	0.044442	0.668631	31
GO:1901701	biological_process	cellular response to oxygen-containing compound	835/22609	1452/40888	1.04	0.0444572	0.668631	835
GO:0004860	molecular_function	protein kinase inhibitor activity	12/22609	15/40888	1.44679	0.0444775	0.668631	12
GO:0009638	biological_process	phototropism	12/22609	15/40888	1.44679	0.0444775	0.668631	12
GO:0010111	biological_process	glyoxysome organization	12/22609	15/40888	1.44679	0.0444775	0.668631	12
GO:0016444	biological_process	somatic cell DNA recombination	12/22609	15/40888	1.44679	0.0444775	0.668631	12
GO:0045168	biological_process	cell-cell signaling involved in cell fate commitment	12/22609	15/40888	1.44679	0.0444775	0.668631	12
GO:0019900	molecular_function	kinase binding	243/22609	408/40888	1.07711	0.0450544	0.676188	243
GO:0032989	biological_process	cellular component morphogenesis	501/22609	861/40888	1.05232	0.0451697	0.676802	501
GO:0015318	molecular_function	inorganic molecular entity transmembrane transporter activity	930/22609	1621/40888	1.03756	0.045272	0.67704	930
GO:0070417	biological_process	cellular response to cold	51/22609	78/40888	1.18247	0.0454273	0.67704	51
GO:0009852	biological_process	auxin catabolic process	21/22609	29/40888	1.30959	0.0455572	0.67704	21
GO:0015086	molecular_function	cadmium ion transmembrane transporter activity	21/22609	29/40888	1.30959	0.0455572	0.67704	21
GO:0060590	molecular_function	ATPase regulator activity	21/22609	29/40888	1.30959	0.0455572	0.67704	21
GO:0042651	cellular_component	thylakoid membrane	279/22609	471/40888	1.07127	0.0457969	0.678548	279
GO:0044093	biological_process	positive regulation of molecular function	96/22609	154/40888	1.12737	0.0458075	0.678548	96
GO:0030976	molecular_function	thiamine pyrophosphate binding	26/22609	37/40888	1.27083	0.045946	0.679494	26
GO:0015276	molecular_function	ligand-gated ion channel activity	34/22609	50/40888	1.22977	0.046467	0.684975	34
GO:0022834	molecular_function	ligand-gated channel activity	34/22609	50/40888	1.22977	0.046467	0.684975	34
GO:0009636	biological_process	response to toxic substance	304/22609	515/40888	1.06753	0.0470736	0.686334	304
GO:0031347	biological_process	regulation of defense response	333/22609	566/40888	1.064	0.0478844	0.686334	333
GO:0090329	biological_process	regulation of DNA-dependent DNA replication	37/22609	55/40888	1.21662	0.047934	0.686334	37
GO:0052689	molecular_function	carboxylic ester hydrolase activity	180/22609	299/40888	1.08872	0.0486161	0.686334	180
GO:0048878	biological_process	chemical homeostasis	552/22609	952/40888	1.04862	0.0487354	0.686334	552
GO:0006479	biological_process	protein methylation	77/22609	122/40888	1.14142	0.0488377	0.686334	77
GO:0008213	biological_process	protein alkylation	77/22609	122/40888	1.14142	0.0488377	0.686334	77
GO:0046040	biological_process	IMP metabolic process	40/22609	60/40888	1.20566	0.0489514	0.686334	40
GO:0009403	biological_process	toxin biosynthetic process	29/22609	42/40888	1.24871	0.0490993	0.686334	29
GO:0009827	biological_process	plant-type cell wall modification	29/22609	42/40888	1.24871	0.0490993	0.686334	29
GO:0015205	molecular_function	nucleobase transmembrane transporter activity	29/22609	42/40888	1.24871	0.0490993	0.686334	29
GO:0015851	biological_process	nucleobase transport	29/22609	42/40888	1.24871	0.0490993	0.686334	29
GO:0033612	molecular_function	receptor serine/threonine kinase binding	29/22609	42/40888	1.24871	0.0490993	0.686334	29
GO:0005315	molecular_function	inorganic phosphate transmembrane transporter activity	58/22609	90/40888	1.16547	0.0493945	0.686334	58
GO:0009615	biological_process	response to virus	147/22609	242/40888	1.09854	0.0494725	0.686334	147
GO:0000777	cellular_component	condensed chromosome kinetochore	19/22609	26/40888	1.32158	0.0496504	0.686334	19
GO:0016841	molecular_function	ammonia-lyase activity	19/22609	26/40888	1.32158	0.0496504	0.686334	19
GO:0009751	biological_process	response to salicylic acid	129/22609	211/40888	1.10566	0.0497545	0.686334	129
GO:0048444	biological_process	floral organ morphogenesis	55/22609	85/40888	1.1702	0.0497642	0.686334	55
GO:0045927	biological_process	positive regulation of growth	52/22609	80/40888	1.17551	0.050003	0.686334	52
GO:0030246	molecular_function	carbohydrate binding	343/22609	584/40888	1.06217	0.0500866	0.686334	343
GO:0006566	biological_process	threonine metabolic process	24/22609	34/40888	1.27658	0.0506048	0.686334	24
GO:0017157	biological_process	regulation of exocytosis	24/22609	34/40888	1.27658	0.0506048	0.686334	24
GO:0031537	biological_process	regulation of anthocyanin metabolic process	24/22609	34/40888	1.27658	0.0506048	0.686334	24
GO:0051046	biological_process	regulation of secretion	24/22609	34/40888	1.27658	0.0506048	0.686334	24
GO:1903530	biological_process	regulation of secretion by cell	24/22609	34/40888	1.27658	0.0506048	0.686334	24
GO:0006573	biological_process	valine metabolic process	71/22609	112/40888	1.14645	0.0506441	0.686334	71
GO:0008097	molecular_function	5S rRNA binding	32/22609	47/40888	1.23131	0.0514037	0.686334	32
GO:0008948	molecular_function	oxaloacetate decarboxylase activity	32/22609	47/40888	1.23131	0.0514037	0.686334	32
GO:0032875	biological_process	regulation of DNA endoreduplication	32/22609	47/40888	1.23131	0.0514037	0.686334	32
GO:0016571	biological_process	histone methylation	68/22609	107/40888	1.14932	0.051498	0.686334	68
GO:0010118	biological_process	stomatal movement	112/22609	182/40888	1.11291	0.0516812	0.686334	112
GO:0000025	biological_process	maltose catabolic process	5/22609	5/40888	1.80848	0.0516823	0.686334	5
GO:0005880	cellular_component	nuclear microtubule	5/22609	5/40888	1.80848	0.0516823	0.686334	5
GO:0008157	molecular_function	protein phosphatase 1 binding	5/22609	5/40888	1.80848	0.0516823	0.686334	5
GO:0009904	biological_process	chloroplast accumulation movement	5/22609	5/40888	1.80848	0.0516823	0.686334	5
GO:0010217	biological_process	cellular aluminum ion homeostasis	5/22609	5/40888	1.80848	0.0516823	0.686334	5
GO:0010295	molecular_function	(+)-abscisic acid 8'-hydroxylase activity	5/22609	5/40888	1.80848	0.0516823	0.686334	5
GO:0010297	molecular_function	heteropolysaccharide binding	5/22609	5/40888	1.80848	0.0516823	0.686334	5
GO:0010500	biological_process	transmitting tissue development	5/22609	5/40888	1.80848	0.0516823	0.686334	5
GO:0015083	molecular_function	aluminum ion transmembrane transporter activity	5/22609	5/40888	1.80848	0.0516823	0.686334	5
GO:0015801	biological_process	aromatic amino acid transport	5/22609	5/40888	1.80848	0.0516823	0.686334	5
GO:0015810	biological_process	aspartate transmembrane transport	5/22609	5/40888	1.80848	0.0516823	0.686334	5
GO:0015827	biological_process	tryptophan transport	5/22609	5/40888	1.80848	0.0516823	0.686334	5
GO:0016107	biological_process	sesquiterpenoid catabolic process	5/22609	5/40888	1.80848	0.0516823	0.686334	5
GO:0031117	biological_process	positive regulation of microtubule depolymerization	5/22609	5/40888	1.80848	0.0516823	0.686334	5
GO:0042353	biological_process	fucose biosynthetic process	5/22609	5/40888	1.80848	0.0516823	0.686334	5
GO:0043290	biological_process	apocarotenoid catabolic process	5/22609	5/40888	1.80848	0.0516823	0.686334	5
GO:0043495	molecular_function	protein membrane anchor	5/22609	5/40888	1.80848	0.0516823	0.686334	5
GO:0045827	biological_process	negative regulation of isoprenoid metabolic process	5/22609	5/40888	1.80848	0.0516823	0.686334	5
GO:0046345	biological_process	abscisic acid catabolic process	5/22609	5/40888	1.80848	0.0516823	0.686334	5
GO:0050513	molecular_function	glycoprotein 2-beta-D-xylosyltransferase activity	5/22609	5/40888	1.80848	0.0516823	0.686334	5
GO:0052318	biological_process	regulation of phytoalexin metabolic process	5/22609	5/40888	1.80848	0.0516823	0.686334	5
GO:0052319	biological_process	regulation of phytoalexin biosynthetic process	5/22609	5/40888	1.80848	0.0516823	0.686334	5
GO:0052320	biological_process	positive regulation of phytoalexin metabolic process	5/22609	5/40888	1.80848	0.0516823	0.686334	5
GO:0052322	biological_process	positive regulation of phytoalexin biosynthetic process	5/22609	5/40888	1.80848	0.0516823	0.686334	5
GO:0055079	biological_process	aluminum ion homeostasis	5/22609	5/40888	1.80848	0.0516823	0.686334	5
GO:0080054	molecular_function	low-affinity nitrate transmembrane transporter activity	5/22609	5/40888	1.80848	0.0516823	0.686334	5
GO:0090322	biological_process	regulation of superoxide metabolic process	5/22609	5/40888	1.80848	0.0516823	0.686334	5
GO:0097298	biological_process	regulation of nucleus size	5/22609	5/40888	1.80848	0.0516823	0.686334	5
GO:1901182	biological_process	regulation of camalexin biosynthetic process	5/22609	5/40888	1.80848	0.0516823	0.686334	5
GO:1901183	biological_process	positive regulation of camalexin biosynthetic process	5/22609	5/40888	1.80848	0.0516823	0.686334	5
GO:1901348	biological_process	positive regulation of secondary cell wall biogenesis	5/22609	5/40888	1.80848	0.0516823	0.686334	5
GO:1901535	biological_process	regulation of DNA demethylation	5/22609	5/40888	1.80848	0.0516823	0.686334	5
GO:1902602	biological_process	aluminum ion transmembrane transport	5/22609	5/40888	1.80848	0.0516823	0.686334	5
GO:1905898	biological_process	positive regulation of response to endoplasmic reticulum stress	5/22609	5/40888	1.80848	0.0516823	0.686334	5
GO:1990415	cellular_component	Pex17p-Pex14p docking complex	5/22609	5/40888	1.80848	0.0516823	0.686334	5
GO:1990429	cellular_component	peroxisomal importomer complex	5/22609	5/40888	1.80848	0.0516823	0.686334	5
GO:1901136	biological_process	carbohydrate derivative catabolic process	65/22609	102/40888	1.15246	0.0523055	0.6936	65
GO:0044421	cellular_component	extracellular region part	167/22609	277/40888	1.09031	0.0525099	0.693983	167
GO:0009723	biological_process	response to ethylene	280/22609	474/40888	1.0683	0.0526053	0.693983	280
GO:0044419	biological_process	interspecies interaction between organisms	209/22609	350/40888	1.07992	0.0526414	0.693983	209
GO:0051129	biological_process	negative regulation of cellular component organization	95/22609	153/40888	1.12291	0.0527578	0.693983	95
GO:0090697	biological_process	post-embryonic plant organ morphogenesis	116/22609	189/40888	1.10997	0.05291	0.693983	116
GO:0031400	biological_process	negative regulation of protein modification process	35/22609	52/40888	1.21725	0.053039	0.693983	35
GO:0042447	biological_process	hormone catabolic process	35/22609	52/40888	1.21725	0.053039	0.693983	35
GO:0019904	molecular_function	protein domain specific binding	59/22609	92/40888	1.15979	0.0537283	0.693983	59
GO:0006225	biological_process	UDP biosynthetic process	17/22609	23/40888	1.33671	0.0539341	0.693983	17
GO:0009133	biological_process	nucleoside diphosphate biosynthetic process	17/22609	23/40888	1.33671	0.0539341	0.693983	17
GO:0009138	biological_process	pyrimidine nucleoside diphosphate metabolic process	17/22609	23/40888	1.33671	0.0539341	0.693983	17
GO:0009139	biological_process	pyrimidine nucleoside diphosphate biosynthetic process	17/22609	23/40888	1.33671	0.0539341	0.693983	17
GO:0009188	biological_process	ribonucleoside diphosphate biosynthetic process	17/22609	23/40888	1.33671	0.0539341	0.693983	17
GO:0009193	biological_process	pyrimidine ribonucleoside diphosphate metabolic process	17/22609	23/40888	1.33671	0.0539341	0.693983	17
GO:0009194	biological_process	pyrimidine ribonucleoside diphosphate biosynthetic process	17/22609	23/40888	1.33671	0.0539341	0.693983	17
GO:0010112	biological_process	regulation of systemic acquired resistance	17/22609	23/40888	1.33671	0.0539341	0.693983	17
GO:0033862	molecular_function	UMP kinase activity	17/22609	23/40888	1.33671	0.0539341	0.693983	17
GO:0042407	biological_process	cristae formation	17/22609	23/40888	1.33671	0.0539341	0.693983	17
GO:0046048	biological_process	UDP metabolic process	17/22609	23/40888	1.33671	0.0539341	0.693983	17
GO:0046704	biological_process	CDP metabolic process	17/22609	23/40888	1.33671	0.0539341	0.693983	17
GO:0046705	biological_process	CDP biosynthetic process	17/22609	23/40888	1.33671	0.0539341	0.693983	17
GO:0035266	biological_process	meristem growth	38/22609	57/40888	1.20566	0.0541442	0.694724	38
GO:0080022	biological_process	primary root development	38/22609	57/40888	1.20566	0.0541442	0.694724	38
GO:0055078	biological_process	sodium ion homeostasis	27/22609	39/40888	1.25203	0.0542855	0.69489	27
GO:0010431	biological_process	seed maturation	56/22609	87/40888	1.16408	0.0543098	0.69489	56
GO:0009624	biological_process	response to nematode	99/22609	160/40888	1.119	0.0544236	0.69537	99
GO:0009527	cellular_component	plastid outer membrane	41/22609	62/40888	1.19593	0.0548271	0.698053	41
GO:0009707	cellular_component	chloroplast outer membrane	41/22609	62/40888	1.19593	0.0548271	0.698053	41
GO:0008236	molecular_function	serine-type peptidase activity	172/22609	286/40888	1.08762	0.0550167	0.698053	172
GO:0016825	molecular_function	hydrolase activity, acting on acid phosphorus-nitrogen bonds	172/22609	286/40888	1.08762	0.0550167	0.698053	172
GO:0017171	molecular_function	serine hydrolase activity	172/22609	286/40888	1.08762	0.0550167	0.698053	172
GO:0009635	biological_process	response to herbicide	44/22609	67/40888	1.18766	0.055172	0.698079	44
GO:0070816	biological_process	phosphorylation of RNA polymerase II C-terminal domain	44/22609	67/40888	1.18766	0.055172	0.698079	44
GO:0009095	biological_process	aromatic amino acid family biosynthetic process, prephenate pathway	22/22609	31/40888	1.28344	0.0557369	0.702301	22
GO:0016554	biological_process	cytidine to uridine editing	22/22609	31/40888	1.28344	0.0557369	0.702301	22
GO:0032885	biological_process	regulation of polysaccharide biosynthetic process	22/22609	31/40888	1.28344	0.0557369	0.702301	22
GO:0009814	biological_process	defense response, incompatible interaction	231/22609	389/40888	1.07393	0.0568907	0.714231	231
GO:0010305	biological_process	leaf vascular tissue pattern formation	30/22609	44/40888	1.23306	0.0569189	0.714231	30
GO:0070507	biological_process	regulation of microtubule cytoskeleton organization	30/22609	44/40888	1.23306	0.0569189	0.714231	30
GO:0030247	molecular_function	polysaccharide binding	63/22609	99/40888	1.15085	0.0573455	0.718593	63
GO:0044798	cellular_component	nuclear transcription factor complex	83/22609	133/40888	1.1286	0.0581181	0.721451	83
GO:0071236	biological_process	cellular response to antibiotic	83/22609	133/40888	1.1286	0.0581181	0.721451	83
GO:0003984	molecular_function	acetolactate synthase activity	15/22609	20/40888	1.35636	0.0582863	0.721451	15
GO:0009956	biological_process	radial pattern formation	15/22609	20/40888	1.35636	0.0582863	0.721451	15
GO:0030100	biological_process	regulation of endocytosis	15/22609	20/40888	1.35636	0.0582863	0.721451	15
GO:0036498	biological_process	IRE1-mediated unfolded protein response	15/22609	20/40888	1.35636	0.0582863	0.721451	15
GO:0052325	biological_process	cell wall pectin biosynthetic process	15/22609	20/40888	1.35636	0.0582863	0.721451	15
GO:1990604	cellular_component	IRE1-TRAF2-ASK1 complex	15/22609	20/40888	1.35636	0.0582863	0.721451	15
GO:2000379	biological_process	positive regulation of reactive oxygen species metabolic process	15/22609	20/40888	1.35636	0.0582863	0.721451	15
GO:0019902	molecular_function	phosphatase binding	33/22609	49/40888	1.21796	0.0587448	0.724274	33
GO:0009535	cellular_component	chloroplast thylakoid membrane	268/22609	454/40888	1.06756	0.0587528	0.724274	268
GO:0055035	cellular_component	plastid thylakoid membrane	268/22609	454/40888	1.06756	0.0587528	0.724274	268
GO:0009832	biological_process	plant-type cell wall biogenesis	155/22609	257/40888	1.09072	0.0589622	0.725873	155
GO:0009536	cellular_component	plastid	3343/22609	5945/40888	1.01695	0.0595492	0.730599	3343
GO:0032504	biological_process	multicellular organism reproduction	178/22609	297/40888	1.08387	0.0595713	0.730599	178
GO:0000775	cellular_component	chromosome, centromeric region	54/22609	84/40888	1.1626	0.059738	0.730599	54
GO:0010948	biological_process	negative regulation of cell cycle process	36/22609	54/40888	1.20566	0.0599429	0.730599	36
GO:0005345	molecular_function	purine nucleobase transmembrane transporter activity	25/22609	36/40888	1.25589	0.0600679	0.730599	25
GO:0006863	biological_process	purine nucleobase transport	25/22609	36/40888	1.25589	0.0600679	0.730599	25
GO:0008066	molecular_function	glutamate receptor activity	25/22609	36/40888	1.25589	0.0600679	0.730599	25
GO:0043680	cellular_component	filiform apparatus	25/22609	36/40888	1.25589	0.0600679	0.730599	25
GO:0060966	biological_process	regulation of gene silencing by RNA	25/22609	36/40888	1.25589	0.0600679	0.730599	25
GO:1905393	biological_process	plant organ formation	101/22609	164/40888	1.11376	0.060594	0.735434	101
GO:0042910	molecular_function	xenobiotic transmembrane transporter activity	39/22609	59/40888	1.19544	0.0606494	0.735434	39
GO:0009735	biological_process	response to cytokinin	152/22609	252/40888	1.09083	0.0607076	0.735434	152
GO:0016682	molecular_function	oxidoreductase activity, acting on diphenols and related substances as donors, oxygen as acceptor	45/22609	69/40888	1.17945	0.0609802	0.737181	45
GO:0019439	biological_process	aromatic compound catabolic process	406/22609	697/40888	1.05344	0.0610348	0.737181	406
GO:0019898	cellular_component	extrinsic component of membrane	119/22609	195/40888	1.10364	0.0610946	0.737181	119
GO:0030149	biological_process	sphingolipid catabolic process	20/22609	28/40888	1.29177	0.0613777	0.738016	20
GO:0046466	biological_process	membrane lipid catabolic process	20/22609	28/40888	1.29177	0.0613777	0.738016	20
GO:0042545	biological_process	cell wall modification	84/22609	135/40888	1.12528	0.0617379	0.738016	84
GO:0032101	biological_process	regulation of response to external stimulus	262/22609	444/40888	1.06717	0.0621055	0.738016	262
GO:0005342	molecular_function	organic acid transmembrane transporter activity	134/22609	221/40888	1.09655	0.0621755	0.738016	134
GO:0046943	molecular_function	carboxylic acid transmembrane transporter activity	134/22609	221/40888	1.09655	0.0621755	0.738016	134
GO:0043068	biological_process	positive regulation of programmed cell death	74/22609	118/40888	1.13413	0.0622638	0.738016	74
GO:0042546	biological_process	cell wall biogenesis	187/22609	313/40888	1.08047	0.0623218	0.738016	187
GO:0000156	molecular_function	phosphorelay response regulator activity	13/22609	17/40888	1.38296	0.0624599	0.738016	13
GO:0008327	molecular_function	methyl-CpG binding	13/22609	17/40888	1.38296	0.0624599	0.738016	13
GO:0008356	biological_process	asymmetric cell division	13/22609	17/40888	1.38296	0.0624599	0.738016	13
GO:0009164	biological_process	nucleoside catabolic process	13/22609	17/40888	1.38296	0.0624599	0.738016	13
GO:0015976	biological_process	carbon utilization	13/22609	17/40888	1.38296	0.0624599	0.738016	13
GO:0034656	biological_process	nucleobase-containing small molecule catabolic process	13/22609	17/40888	1.38296	0.0624599	0.738016	13
GO:0051195	biological_process	negative regulation of cofactor metabolic process	13/22609	17/40888	1.38296	0.0624599	0.738016	13
GO:2000014	biological_process	regulation of endosperm development	13/22609	17/40888	1.38296	0.0624599	0.738016	13
GO:0010449	biological_process	root meristem growth	28/22609	41/40888	1.23506	0.0630925	0.742285	28
GO:0048359	biological_process	mucilage metabolic process involved in seed coat development	28/22609	41/40888	1.23506	0.0630925	0.742285	28
GO:0044272	biological_process	sulfur compound biosynthetic process	287/22609	488/40888	1.0636	0.0631935	0.742285	287
GO:0071241	biological_process	cellular response to inorganic substance	81/22609	130/40888	1.12682	0.0632702	0.742285	81
GO:0090575	cellular_component	RNA polymerase II transcription factor complex	81/22609	130/40888	1.12682	0.0632702	0.742285	81
GO:1901361	biological_process	organic cyclic compound catabolic process	442/22609	761/40888	1.05039	0.063535	0.742285	442
GO:0000023	biological_process	maltose metabolic process	7/22609	8/40888	1.58242	0.0652464	0.742285	7
GO:0017057	molecular_function	6-phosphogluconolactonase activity	7/22609	8/40888	1.58242	0.0652464	0.742285	7
GO:0030010	biological_process	establishment of cell polarity	7/22609	8/40888	1.58242	0.0652464	0.742285	7
GO:0071786	biological_process	endoplasmic reticulum tubular network organization	7/22609	8/40888	1.58242	0.0652464	0.742285	7
GO:1900109	biological_process	regulation of histone H3-K9 dimethylation	7/22609	8/40888	1.58242	0.0652464	0.742285	7
GO:1900111	biological_process	positive regulation of histone H3-K9 dimethylation	7/22609	8/40888	1.58242	0.0652464	0.742285	7
GO:1900378	biological_process	positive regulation of secondary metabolite biosynthetic process	7/22609	8/40888	1.58242	0.0652464	0.742285	7
GO:1990135	molecular_function	flavonoid sulfotransferase activity	7/22609	8/40888	1.58242	0.0652464	0.742285	7
GO:0030968	biological_process	endoplasmic reticulum unfolded protein response	92/22609	149/40888	1.11665	0.0656874	0.742285	92
GO:0022603	biological_process	regulation of anatomical structure morphogenesis	220/22609	371/40888	1.07242	0.0656931	0.742285	220
GO:0031072	molecular_function	heat shock protein binding	244/22609	413/40888	1.06845	0.0658025	0.742285	244
GO:0001906	biological_process	cell killing	11/22609	14/40888	1.42095	0.0659551	0.742285	11
GO:0004325	molecular_function	ferrochelatase activity	11/22609	14/40888	1.42095	0.0659551	0.742285	11
GO:0005779	cellular_component	integral component of peroxisomal membrane	11/22609	14/40888	1.42095	0.0659551	0.742285	11
GO:0008686	molecular_function	3,4-dihydroxy-2-butanone-4-phosphate synthase activity	11/22609	14/40888	1.42095	0.0659551	0.742285	11
GO:0010274	biological_process	hydrotropism	11/22609	14/40888	1.42095	0.0659551	0.742285	11
GO:0031231	cellular_component	intrinsic component of peroxisomal membrane	11/22609	14/40888	1.42095	0.0659551	0.742285	11
GO:0031640	biological_process	killing of cells of other organism	11/22609	14/40888	1.42095	0.0659551	0.742285	11
GO:0044364	biological_process	disruption of cells of other organism	11/22609	14/40888	1.42095	0.0659551	0.742285	11
GO:0090480	biological_process	purine nucleotide-sugar transmembrane transport	11/22609	14/40888	1.42095	0.0659551	0.742285	11
GO:0000902	biological_process	cell morphogenesis	470/22609	811/40888	1.04807	0.0662981	0.742285	470
GO:0010167	biological_process	response to nitrate	34/22609	51/40888	1.20566	0.0664299	0.742285	34
GO:0045930	biological_process	negative regulation of mitotic cell cycle	34/22609	51/40888	1.20566	0.0664299	0.742285	34
GO:0010050	biological_process	vegetative phase change	23/22609	33/40888	1.26046	0.0665235	0.742285	23
GO:0051865	biological_process	protein autoubiquitination	23/22609	33/40888	1.26046	0.0665235	0.742285	23
GO:0016556	biological_process	mRNA modification	46/22609	71/40888	1.17169	0.0670155	0.742285	46
GO:0005667	cellular_component	transcription factor complex	103/22609	168/40888	1.10877	0.0670947	0.742285	103
GO:0006549	biological_process	isoleucine metabolic process	43/22609	66/40888	1.17825	0.0673576	0.742285	43
GO:0009097	biological_process	isoleucine biosynthetic process	43/22609	66/40888	1.17825	0.0673576	0.742285	43
GO:0010191	biological_process	mucilage metabolic process	43/22609	66/40888	1.17825	0.0673576	0.742285	43
GO:0009911	biological_process	positive regulation of flower development	40/22609	61/40888	1.18589	0.0674278	0.742285	40
GO:0010252	biological_process	auxin homeostasis	40/22609	61/40888	1.18589	0.0674278	0.742285	40
GO:0031428	cellular_component	box C/D snoRNP complex	40/22609	61/40888	1.18589	0.0674278	0.742285	40
GO:0030244	biological_process	cellulose biosynthetic process	89/22609	144/40888	1.11774	0.0674664	0.742285	89
GO:0005089	molecular_function	Rho guanyl-nucleotide exchange factor activity	18/22609	25/40888	1.30211	0.0675528	0.742285	18
GO:0009649	biological_process	entrainment of circadian clock	18/22609	25/40888	1.30211	0.0675528	0.742285	18
GO:0009861	biological_process	jasmonic acid and ethylene-dependent systemic resistance	18/22609	25/40888	1.30211	0.0675528	0.742285	18
GO:0015299	molecular_function	solute:proton antiporter activity	62/22609	98/40888	1.14414	0.067697	0.742285	62
GO:0000229	cellular_component	cytoplasmic chromosome	9/22609	11/40888	1.47967	0.0677101	0.742285	9
GO:0004656	molecular_function	procollagen-proline 4-dioxygenase activity	9/22609	11/40888	1.47967	0.0677101	0.742285	9
GO:0005458	molecular_function	GDP-mannose transmembrane transporter activity	9/22609	11/40888	1.47967	0.0677101	0.742285	9
GO:0016819	molecular_function	hydrolase activity, acting on acid anhydrides, in sulfonyl-containing anhydrides	9/22609	11/40888	1.47967	0.0677101	0.742285	9
GO:0018401	biological_process	peptidyl-proline hydroxylation to 4-hydroxy-L-proline	9/22609	11/40888	1.47967	0.0677101	0.742285	9
GO:0019471	biological_process	4-hydroxyproline metabolic process	9/22609	11/40888	1.47967	0.0677101	0.742285	9
GO:0019798	molecular_function	procollagen-proline dioxygenase activity	9/22609	11/40888	1.47967	0.0677101	0.742285	9
GO:0030267	molecular_function	glyoxylate reductase (NADP) activity	9/22609	11/40888	1.47967	0.0677101	0.742285	9
GO:0031545	molecular_function	peptidyl-proline 4-dioxygenase activity	9/22609	11/40888	1.47967	0.0677101	0.742285	9
GO:0043971	biological_process	histone H3-K18 acetylation	9/22609	11/40888	1.47967	0.0677101	0.742285	9
GO:0045833	biological_process	negative regulation of lipid metabolic process	9/22609	11/40888	1.47967	0.0677101	0.742285	9
GO:0047627	molecular_function	adenylylsulfatase activity	9/22609	11/40888	1.47967	0.0677101	0.742285	9
GO:0051176	biological_process	positive regulation of sulfur metabolic process	9/22609	11/40888	1.47967	0.0677101	0.742285	9
GO:0070829	biological_process	heterochromatin maintenance	9/22609	11/40888	1.47967	0.0677101	0.742285	9
GO:1901672	biological_process	positive regulation of systemic acquired resistance	9/22609	11/40888	1.47967	0.0677101	0.742285	9
GO:1990570	biological_process	GDP-mannose transmembrane transport	9/22609	11/40888	1.47967	0.0677101	0.742285	9
GO:0050684	biological_process	regulation of mRNA processing	72/22609	115/40888	1.13227	0.067955	0.744075	72
GO:0019901	molecular_function	protein kinase binding	182/22609	305/40888	1.07916	0.0683174	0.747144	182
GO:0051093	biological_process	negative regulation of developmental process	144/22609	239/40888	1.08963	0.0689439	0.753092	144
GO:0060560	biological_process	developmental growth involved in morphogenesis	421/22609	725/40888	1.05017	0.0694578	0.756983	421
GO:0006914	biological_process	autophagy	148/22609	246/40888	1.08803	0.0695494	0.756983	148
GO:0061919	biological_process	process utilizing autophagic mechanism	148/22609	246/40888	1.08803	0.0695494	0.756983	148
GO:0031110	biological_process	regulation of microtubule polymerization or depolymerization	26/22609	38/40888	1.23738	0.070018	0.761174	26
GO:0031935	biological_process	regulation of chromatin silencing	29/22609	43/40888	1.21967	0.0723069	0.784108	29
GO:1902183	biological_process	regulation of shoot apical meristem development	29/22609	43/40888	1.21967	0.0723069	0.784108	29
GO:0009850	biological_process	auxin metabolic process	73/22609	117/40888	1.12837	0.0723858	0.784108	73
GO:0010087	biological_process	phloem or xylem histogenesis	101/22609	165/40888	1.10701	0.0725136	0.784559	101
GO:0043244	biological_process	regulation of protein complex disassembly	80/22609	129/40888	1.12154	0.0730389	0.785083	80
GO:0009611	biological_process	response to wounding	188/22609	316/40888	1.07593	0.0731299	0.785083	188
GO:0051607	biological_process	defense response to virus	47/22609	73/40888	1.16437	0.0732636	0.785083	47
GO:0009089	biological_process	lysine biosynthetic process via diaminopimelate	21/22609	30/40888	1.26594	0.0737401	0.785083	21
GO:0030523	molecular_function	dihydrolipoamide S-acyltransferase activity	21/22609	30/40888	1.26594	0.0737401	0.785083	21
GO:0046451	biological_process	diaminopimelate metabolic process	21/22609	30/40888	1.26594	0.0737401	0.785083	21
GO:1905421	biological_process	regulation of plant organ morphogenesis	21/22609	30/40888	1.26594	0.0737401	0.785083	21
GO:0016407	molecular_function	acetyltransferase activity	142/22609	236/40888	1.08816	0.0738158	0.785083	142
GO:0016837	molecular_function	carbon-oxygen lyase activity, acting on polysaccharides	16/22609	22/40888	1.31526	0.0742653	0.785083	16
GO:0030570	molecular_function	pectate lyase activity	16/22609	22/40888	1.31526	0.0742653	0.785083	16
GO:0031405	molecular_function	lipoic acid binding	16/22609	22/40888	1.31526	0.0742653	0.785083	16
GO:0045839	biological_process	negative regulation of mitotic nuclear division	16/22609	22/40888	1.31526	0.0742653	0.785083	16
GO:0102336	molecular_function	3-oxo-arachidoyl-CoA synthase activity	16/22609	22/40888	1.31526	0.0742653	0.785083	16
GO:0102337	molecular_function	3-oxo-cerotoyl-CoA synthase activity	16/22609	22/40888	1.31526	0.0742653	0.785083	16
GO:0102338	molecular_function	3-oxo-lignoceronyl-CoA synthase activity	16/22609	22/40888	1.31526	0.0742653	0.785083	16
GO:0102756	molecular_function	very-long-chain 3-ketoacyl-CoA synthase activity	16/22609	22/40888	1.31526	0.0742653	0.785083	16
GO:0009099	biological_process	valine biosynthetic process	35/22609	53/40888	1.19428	0.0744247	0.785083	35
GO:0009566	biological_process	fertilization	35/22609	53/40888	1.19428	0.0744247	0.785083	35
GO:0009567	biological_process	double fertilization forming a zygote and endosperm	35/22609	53/40888	1.19428	0.0744247	0.785083	35
GO:0035821	biological_process	modification of morphology or physiology of other organism	41/22609	63/40888	1.17695	0.0744579	0.785083	41
GO:2001023	biological_process	regulation of response to drug	41/22609	63/40888	1.17695	0.0744579	0.785083	41
GO:2001038	biological_process	regulation of cellular response to drug	41/22609	63/40888	1.17695	0.0744579	0.785083	41
GO:0018022	biological_process	peptidyl-lysine methylation	38/22609	58/40888	1.18487	0.074637	0.785153	38
GO:0051131	biological_process	chaperone-mediated protein complex assembly	38/22609	58/40888	1.18487	0.074637	0.785153	38
GO:0043531	molecular_function	ADP binding	177/22609	297/40888	1.07778	0.0748862	0.786867	177
GO:0055065	biological_process	metal ion homeostasis	290/22609	495/40888	1.05952	0.0752037	0.789292	290
GO:0072509	molecular_function	divalent inorganic cation transmembrane transporter activity	67/22609	107/40888	1.13241	0.0759604	0.796317	67
GO:0030243	biological_process	cellulose metabolic process	113/22609	186/40888	1.0987	0.0763605	0.799591	113
GO:0061025	biological_process	membrane fusion	88/22609	143/40888	1.11291	0.0772274	0.807274	88
GO:0010942	biological_process	positive regulation of cell death	81/22609	131/40888	1.11822	0.0773093	0.807274	81
GO:0044703	biological_process	multi-organism reproductive process	178/22609	299/40888	1.07662	0.0773601	0.807274	178
GO:0009524	cellular_component	phragmoplast	186/22609	313/40888	1.07469	0.0777162	0.808231	186
GO:0008378	molecular_function	galactosyltransferase activity	24/22609	35/40888	1.2401	0.0778067	0.808231	24
GO:0044390	molecular_function	ubiquitin-like protein conjugating enzyme binding	24/22609	35/40888	1.2401	0.0778067	0.808231	24
GO:1902290	biological_process	positive regulation of defense response to oomycetes	24/22609	35/40888	1.2401	0.0778067	0.808231	24
GO:0040007	biological_process	growth	576/22609	1001/40888	1.04065	0.0782329	0.811733	576
GO:0016049	biological_process	cell growth	484/22609	838/40888	1.04452	0.0786239	0.814862	484
GO:0019827	biological_process	stem cell population maintenance	92/22609	150/40888	1.1092	0.0790351	0.817264	92
GO:0098727	biological_process	maintenance of cell number	92/22609	150/40888	1.1092	0.0790351	0.817264	92
GO:0009937	biological_process	regulation of gibberellic acid mediated signaling pathway	27/22609	40/40888	1.22073	0.0803782	0.828175	27
GO:0051445	biological_process	regulation of meiotic cell cycle	27/22609	40/40888	1.22073	0.0803782	0.828175	27
GO:0061630	molecular_function	ubiquitin protein ligase activity	152/22609	254/40888	1.08224	0.0805241	0.828175	152
GO:0061659	molecular_function	ubiquitin-like protein ligase activity	152/22609	254/40888	1.08224	0.0805241	0.828175	152
GO:0006623	biological_process	protein targeting to vacuole	45/22609	70/40888	1.1626	0.0808105	0.828175	45
GO:0006828	biological_process	manganese ion transport	14/22609	19/40888	1.33257	0.0814685	0.828175	14
GO:0010020	biological_process	chloroplast fission	14/22609	19/40888	1.33257	0.0814685	0.828175	14
GO:0031540	biological_process	regulation of anthocyanin biosynthetic process	14/22609	19/40888	1.33257	0.0814685	0.828175	14
GO:0032440	molecular_function	2-alkenal reductase [NAD(P)] activity	14/22609	19/40888	1.33257	0.0814685	0.828175	14
GO:0043572	biological_process	plastid fission	14/22609	19/40888	1.33257	0.0814685	0.828175	14
GO:0046352	biological_process	disaccharide catabolic process	14/22609	19/40888	1.33257	0.0814685	0.828175	14
GO:0051204	biological_process	protein insertion into mitochondrial membrane	14/22609	19/40888	1.33257	0.0814685	0.828175	14
GO:0070545	cellular_component	PeBoW complex	14/22609	19/40888	1.33257	0.0814685	0.828175	14
GO:0090151	biological_process	establishment of protein localization to mitochondrial membrane	14/22609	19/40888	1.33257	0.0814685	0.828175	14
GO:0051716	biological_process	cellular response to stimulus	3375/22609	6013/40888	1.01507	0.081694	0.828175	3375
GO:0010044	biological_process	response to aluminum ion	19/22609	27/40888	1.27264	0.0818175	0.828175	19
GO:0034975	biological_process	protein folding in endoplasmic reticulum	19/22609	27/40888	1.27264	0.0818175	0.828175	19
GO:0036377	biological_process	arbuscular mycorrhizal association	19/22609	27/40888	1.27264	0.0818175	0.828175	19
GO:0080156	biological_process	mitochondrial mRNA modification	19/22609	27/40888	1.27264	0.0818175	0.828175	19
GO:0030173	cellular_component	integral component of Golgi membrane	39/22609	60/40888	1.17551	0.0823743	0.829698	39
GO:0030422	biological_process	production of siRNA involved in RNA interference	39/22609	60/40888	1.17551	0.0823743	0.829698	39
GO:0031228	cellular_component	intrinsic component of Golgi membrane	39/22609	60/40888	1.17551	0.0823743	0.829698	39
GO:0042054	molecular_function	histone methyltransferase activity	39/22609	60/40888	1.17551	0.0823743	0.829698	39
GO:0030308	biological_process	negative regulation of cell growth	33/22609	50/40888	1.1936	0.0825781	0.829698	33
GO:1901001	biological_process	negative regulation of response to salt stress	33/22609	50/40888	1.1936	0.0825781	0.829698	33
GO:0006188	biological_process	IMP biosynthetic process	36/22609	55/40888	1.18373	0.0826965	0.829698	36
GO:0006714	biological_process	sesquiterpenoid metabolic process	36/22609	55/40888	1.18373	0.0826965	0.829698	36
GO:0015491	molecular_function	cation:cation antiporter activity	55/22609	87/40888	1.14329	0.0830509	0.831456	55
GO:0035966	biological_process	response to topologically incorrect protein	299/22609	512/40888	1.05613	0.0840693	0.831456	299
GO:0015103	molecular_function	inorganic anion transmembrane transporter activity	108/22609	178/40888	1.09728	0.0847192	0.831456	108
GO:0031331	biological_process	positive regulation of cellular catabolic process	90/22609	147/40888	1.10723	0.0855438	0.831456	90
GO:0006865	biological_process	amino acid transport	101/22609	166/40888	1.10034	0.0860475	0.831456	101
GO:0004185	molecular_function	serine-type carboxypeptidase activity	69/22609	111/40888	1.12419	0.0860637	0.831456	69
GO:0010154	biological_process	fruit development	690/22609	1205/40888	1.03556	0.0861008	0.831456	690
GO:0004124	molecular_function	cysteine synthase activity	22/22609	32/40888	1.24333	0.0865917	0.831456	22
GO:0009612	biological_process	response to mechanical stimulus	22/22609	32/40888	1.24333	0.0865917	0.831456	22
GO:0031624	molecular_function	ubiquitin conjugating enzyme binding	22/22609	32/40888	1.24333	0.0865917	0.831456	22
GO:0044070	biological_process	regulation of anion transport	22/22609	32/40888	1.24333	0.0865917	0.831456	22
GO:0010119	biological_process	regulation of stomatal movement	162/22609	272/40888	1.07711	0.0868984	0.831456	162
GO:0071369	biological_process	cellular response to ethylene stimulus	206/22609	349/40888	1.06747	0.0876062	0.831456	206
GO:0043414	biological_process	macromolecule methylation	186/22609	314/40888	1.07127	0.0877239	0.831456	186
GO:0048589	biological_process	developmental growth	491/22609	852/40888	1.04221	0.0883304	0.831456	491
GO:0032268	biological_process	regulation of cellular protein metabolic process	531/22609	923/40888	1.04042	0.0886956	0.831456	531
GO:0003680	molecular_function	AT DNA binding	12/22609	16/40888	1.35636	0.0890072	0.831456	12
GO:0003906	molecular_function	DNA-(apurinic or apyrimidinic site) endonuclease activity	12/22609	16/40888	1.35636	0.0890072	0.831456	12
GO:0006597	biological_process	spermine biosynthetic process	12/22609	16/40888	1.35636	0.0890072	0.831456	12
GO:0008117	molecular_function	sphinganine-1-phosphate aldolase activity	12/22609	16/40888	1.35636	0.0890072	0.831456	12
GO:0009700	biological_process	indole phytoalexin biosynthetic process	12/22609	16/40888	1.35636	0.0890072	0.831456	12
GO:0010120	biological_process	camalexin biosynthetic process	12/22609	16/40888	1.35636	0.0890072	0.831456	12
GO:0015800	biological_process	acidic amino acid transport	12/22609	16/40888	1.35636	0.0890072	0.831456	12
GO:0033919	molecular_function	glucan 1,3-alpha-glucosidase activity	12/22609	16/40888	1.35636	0.0890072	0.831456	12
GO:0035198	molecular_function	miRNA binding	12/22609	16/40888	1.35636	0.0890072	0.831456	12
GO:0046217	biological_process	indole phytoalexin metabolic process	12/22609	16/40888	1.35636	0.0890072	0.831456	12
GO:0048448	biological_process	stamen morphogenesis	12/22609	16/40888	1.35636	0.0890072	0.831456	12
GO:0048574	biological_process	long-day photoperiodism, flowering	12/22609	16/40888	1.35636	0.0890072	0.831456	12
GO:0052317	biological_process	camalexin metabolic process	12/22609	16/40888	1.35636	0.0890072	0.831456	12
GO:0090600	molecular_function	alpha-1,3-glucosidase activity	12/22609	16/40888	1.35636	0.0890072	0.831456	12
GO:1901402	biological_process	negative regulation of tetrapyrrole metabolic process	12/22609	16/40888	1.35636	0.0890072	0.831456	12
GO:1901464	biological_process	negative regulation of tetrapyrrole biosynthetic process	12/22609	16/40888	1.35636	0.0890072	0.831456	12
GO:1902117	biological_process	positive regulation of organelle assembly	12/22609	16/40888	1.35636	0.0890072	0.831456	12
GO:1902325	biological_process	negative regulation of chlorophyll biosynthetic process	12/22609	16/40888	1.35636	0.0890072	0.831456	12
GO:1902882	biological_process	regulation of response to oxidative stress	12/22609	16/40888	1.35636	0.0890072	0.831456	12
GO:0031647	biological_process	regulation of protein stability	113/22609	187/40888	1.09283	0.0894975	0.831456	113
GO:0002831	biological_process	regulation of response to biotic stimulus	256/22609	437/40888	1.05943	0.0897396	0.831456	256
GO:0007135	biological_process	meiosis II	17/22609	24/40888	1.28101	0.0908671	0.831456	17
GO:0045144	biological_process	meiotic sister chromatid segregation	17/22609	24/40888	1.28101	0.0908671	0.831456	17
GO:0051177	biological_process	meiotic sister chromatid cohesion	17/22609	24/40888	1.28101	0.0908671	0.831456	17
GO:0061983	biological_process	meiosis II cell cycle process	17/22609	24/40888	1.28101	0.0908671	0.831456	17
GO:0062014	biological_process	negative regulation of small molecule metabolic process	17/22609	24/40888	1.28101	0.0908671	0.831456	17
GO:0009543	cellular_component	chloroplast thylakoid lumen	28/22609	42/40888	1.20566	0.0910787	0.831456	28
GO:0009610	biological_process	response to symbiotic fungus	28/22609	42/40888	1.20566	0.0910787	0.831456	28
GO:0010162	biological_process	seed dormancy process	28/22609	42/40888	1.20566	0.0910787	0.831456	28
GO:0022611	biological_process	dormancy process	28/22609	42/40888	1.20566	0.0910787	0.831456	28
GO:0031978	cellular_component	plastid thylakoid lumen	28/22609	42/40888	1.20566	0.0910787	0.831456	28
GO:0034968	biological_process	histone lysine methylation	37/22609	57/40888	1.17393	0.091214	0.831456	37
GO:0051510	biological_process	regulation of unidimensional cell growth	70/22609	113/40888	1.1203	0.0912953	0.831456	70
GO:0006626	biological_process	protein targeting to mitochondrion	34/22609	52/40888	1.18247	0.0917237	0.831456	34
GO:0070585	biological_process	protein localization to mitochondrion	34/22609	52/40888	1.18247	0.0917237	0.831456	34
GO:0072655	biological_process	establishment of protein localization to mitochondrion	34/22609	52/40888	1.18247	0.0917237	0.831456	34
GO:0050790	biological_process	regulation of catalytic activity	212/22609	360/40888	1.065	0.092421	0.831456	212
GO:0009742	biological_process	brassinosteroid mediated signaling pathway	99/22609	163/40888	1.0984	0.0927999	0.831456	99
GO:0043401	biological_process	steroid hormone mediated signaling pathway	99/22609	163/40888	1.0984	0.0927999	0.831456	99
GO:0048545	biological_process	response to steroid hormone	99/22609	163/40888	1.0984	0.0927999	0.831456	99
GO:0071367	biological_process	cellular response to brassinosteroid stimulus	99/22609	163/40888	1.0984	0.0927999	0.831456	99
GO:0071383	biological_process	cellular response to steroid hormone stimulus	99/22609	163/40888	1.0984	0.0927999	0.831456	99
GO:0070838	biological_process	divalent metal ion transport	168/22609	283/40888	1.07359	0.092845	0.831456	168
GO:0000132	biological_process	establishment of mitotic spindle orientation	4/22609	4/40888	1.80848	0.0934739	0.831456	4
GO:0001944	biological_process	vasculature development	4/22609	4/40888	1.80848	0.0934739	0.831456	4
GO:0004561	molecular_function	alpha-N-acetylglucosaminidase activity	4/22609	4/40888	1.80848	0.0934739	0.831456	4
GO:0006063	biological_process	uronic acid metabolic process	4/22609	4/40888	1.80848	0.0934739	0.831456	4
GO:0006123	biological_process	mitochondrial electron transport, cytochrome c to oxygen	4/22609	4/40888	1.80848	0.0934739	0.831456	4
GO:0006750	biological_process	glutathione biosynthetic process	4/22609	4/40888	1.80848	0.0934739	0.831456	4
GO:0008535	biological_process	respiratory chain complex IV assembly	4/22609	4/40888	1.80848	0.0934739	0.831456	4
GO:0009969	biological_process	xyloglucan biosynthetic process	4/22609	4/40888	1.80848	0.0934739	0.831456	4
GO:0010055	biological_process	atrichoblast differentiation	4/22609	4/40888	1.80848	0.0934739	0.831456	4
GO:0015603	molecular_function	iron chelate transmembrane transporter activity	4/22609	4/40888	1.80848	0.0934739	0.831456	4
GO:0015824	biological_process	proline transport	4/22609	4/40888	1.80848	0.0934739	0.831456	4
GO:0018027	biological_process	peptidyl-lysine dimethylation	4/22609	4/40888	1.80848	0.0934739	0.831456	4
GO:0019184	biological_process	nonribosomal peptide biosynthetic process	4/22609	4/40888	1.80848	0.0934739	0.831456	4
GO:0019586	biological_process	galacturonate metabolic process	4/22609	4/40888	1.80848	0.0934739	0.831456	4
GO:0032977	molecular_function	membrane insertase activity	4/22609	4/40888	1.80848	0.0934739	0.831456	4
GO:0033481	biological_process	galacturonate biosynthetic process	4/22609	4/40888	1.80848	0.0934739	0.831456	4
GO:0033617	biological_process	mitochondrial respiratory chain complex IV assembly	4/22609	4/40888	1.80848	0.0934739	0.831456	4
GO:0034453	biological_process	microtubule anchoring	4/22609	4/40888	1.80848	0.0934739	0.831456	4
GO:0040001	biological_process	establishment of mitotic spindle localization	4/22609	4/40888	1.80848	0.0934739	0.831456	4
GO:0046975	molecular_function	histone methyltransferase activity (H3-K36 specific)	4/22609	4/40888	1.80848	0.0934739	0.831456	4
GO:0047274	molecular_function	galactinol-sucrose galactosyltransferase activity	4/22609	4/40888	1.80848	0.0934739	0.831456	4
GO:0047974	molecular_function	guanosine deaminase activity	4/22609	4/40888	1.80848	0.0934739	0.831456	4
GO:0050334	molecular_function	thiaminase activity	4/22609	4/40888	1.80848	0.0934739	0.831456	4
GO:0050577	molecular_function	GDP-L-fucose synthase activity	4/22609	4/40888	1.80848	0.0934739	0.831456	4
GO:0051031	biological_process	tRNA transport	4/22609	4/40888	1.80848	0.0934739	0.831456	4
GO:0051293	biological_process	establishment of spindle localization	4/22609	4/40888	1.80848	0.0934739	0.831456	4
GO:0051294	biological_process	establishment of spindle orientation	4/22609	4/40888	1.80848	0.0934739	0.831456	4
GO:0051653	biological_process	spindle localization	4/22609	4/40888	1.80848	0.0934739	0.831456	4
GO:0051980	molecular_function	iron-nicotianamine transmembrane transporter activity	4/22609	4/40888	1.80848	0.0934739	0.831456	4
GO:0070509	biological_process	calcium ion import	4/22609	4/40888	1.80848	0.0934739	0.831456	4
GO:0072358	biological_process	cardiovascular system development	4/22609	4/40888	1.80848	0.0934739	0.831456	4
GO:0072359	biological_process	circulatory system development	4/22609	4/40888	1.80848	0.0934739	0.831456	4
GO:0080083	molecular_function	beta-gentiobiose beta-glucosidase activity	4/22609	4/40888	1.80848	0.0934739	0.831456	4
GO:0090057	biological_process	root radial pattern formation	4/22609	4/40888	1.80848	0.0934739	0.831456	4
GO:0097431	cellular_component	mitotic spindle pole	4/22609	4/40888	1.80848	0.0934739	0.831456	4
GO:0102627	molecular_function	parthenolide 3beta-hydroxylase activity	4/22609	4/40888	1.80848	0.0934739	0.831456	4
GO:0102628	molecular_function	costunolide 3beta-hydroxylase activity	4/22609	4/40888	1.80848	0.0934739	0.831456	4
GO:0106118	biological_process	regulation of sterol biosynthetic process	4/22609	4/40888	1.80848	0.0934739	0.831456	4
GO:1900370	biological_process	positive regulation of RNA interference	4/22609	4/40888	1.80848	0.0934739	0.831456	4
GO:1900407	biological_process	regulation of cellular response to oxidative stress	4/22609	4/40888	1.80848	0.0934739	0.831456	4
GO:1901537	biological_process	positive regulation of DNA demethylation	4/22609	4/40888	1.80848	0.0934739	0.831456	4
GO:1903533	biological_process	regulation of protein targeting	4/22609	4/40888	1.80848	0.0934739	0.831456	4
GO:1904294	biological_process	positive regulation of ERAD pathway	4/22609	4/40888	1.80848	0.0934739	0.831456	4
GO:1905036	biological_process	positive regulation of antifungal innate immune response	4/22609	4/40888	1.80848	0.0934739	0.831456	4
GO:1905157	biological_process	positive regulation of photosynthesis	4/22609	4/40888	1.80848	0.0934739	0.831456	4
GO:1990247	molecular_function	N6-methyladenosine-containing RNA binding	4/22609	4/40888	1.80848	0.0934739	0.831456	4
GO:2000121	biological_process	regulation of removal of superoxide radicals	4/22609	4/40888	1.80848	0.0934739	0.831456	4
GO:2000378	biological_process	negative regulation of reactive oxygen species metabolic process	4/22609	4/40888	1.80848	0.0934739	0.831456	4
GO:0009620	biological_process	response to fungus	477/22609	828/40888	1.04184	0.0936632	0.831456	477
GO:0030515	molecular_function	snoRNA binding	74/22609	120/40888	1.11523	0.0939104	0.831456	74
GO:0010383	biological_process	cell wall polysaccharide metabolic process	85/22609	139/40888	1.10591	0.0953873	0.831456	85
GO:0009873	biological_process	ethylene-activated signaling pathway	201/22609	341/40888	1.066	0.0954389	0.831456	201
GO:0004014	molecular_function	adenosylmethionine decarboxylase activity	10/22609	13/40888	1.39114	0.0964766	0.831456	10
GO:0004376	molecular_function	glycolipid mannosyltransferase activity	10/22609	13/40888	1.39114	0.0964766	0.831456	10
GO:0006557	biological_process	S-adenosylmethioninamine biosynthetic process	10/22609	13/40888	1.39114	0.0964766	0.831456	10
GO:0010086	biological_process	embryonic root morphogenesis	10/22609	13/40888	1.39114	0.0964766	0.831456	10
GO:0015717	biological_process	triose phosphate transport	10/22609	13/40888	1.39114	0.0964766	0.831456	10
GO:0031279	biological_process	regulation of cyclase activity	10/22609	13/40888	1.39114	0.0964766	0.831456	10
GO:0034052	biological_process	positive regulation of plant-type hypersensitive response	10/22609	13/40888	1.39114	0.0964766	0.831456	10
GO:0035436	biological_process	triose phosphate transmembrane transport	10/22609	13/40888	1.39114	0.0964766	0.831456	10
GO:0044154	biological_process	histone H3-K14 acetylation	10/22609	13/40888	1.39114	0.0964766	0.831456	10
GO:0046136	biological_process	positive regulation of vitamin metabolic process	10/22609	13/40888	1.39114	0.0964766	0.831456	10
GO:0046499	biological_process	S-adenosylmethioninamine metabolic process	10/22609	13/40888	1.39114	0.0964766	0.831456	10
GO:0046524	molecular_function	sucrose-phosphate synthase activity	10/22609	13/40888	1.39114	0.0964766	0.831456	10
GO:0051567	biological_process	histone H3-K9 methylation	10/22609	13/40888	1.39114	0.0964766	0.831456	10
GO:0051765	molecular_function	inositol tetrakisphosphate kinase activity	10/22609	13/40888	1.39114	0.0964766	0.831456	10
GO:0071917	molecular_function	triose-phosphate transmembrane transporter activity	10/22609	13/40888	1.39114	0.0964766	0.831456	10
GO:0080183	biological_process	response to photooxidative stress	10/22609	13/40888	1.39114	0.0964766	0.831456	10
GO:1901031	biological_process	regulation of response to reactive oxygen species	10/22609	13/40888	1.39114	0.0964766	0.831456	10
GO:1904965	biological_process	regulation of vitamin E biosynthetic process	10/22609	13/40888	1.39114	0.0964766	0.831456	10
GO:1904966	biological_process	positive regulation of vitamin E biosynthetic process	10/22609	13/40888	1.39114	0.0964766	0.831456	10
GO:0006349	biological_process	regulation of gene expression by genetic imprinting	20/22609	29/40888	1.24723	0.0965345	0.831456	20
GO:0008215	biological_process	spermine metabolic process	20/22609	29/40888	1.24723	0.0965345	0.831456	20
GO:0009094	biological_process	L-phenylalanine biosynthetic process	20/22609	29/40888	1.24723	0.0965345	0.831456	20
GO:0010039	biological_process	response to iron ion	20/22609	29/40888	1.24723	0.0965345	0.831456	20
GO:0071514	biological_process	genetic imprinting	20/22609	29/40888	1.24723	0.0965345	0.831456	20
GO:1902223	biological_process	erythrose 4-phosphate/phosphoenolpyruvate family amino acid biosynthetic process	20/22609	29/40888	1.24723	0.0965345	0.831456	20
GO:1903959	biological_process	regulation of anion transmembrane transport	20/22609	29/40888	1.24723	0.0965345	0.831456	20
GO:0016051	biological_process	carbohydrate biosynthetic process	387/22609	669/40888	1.04616	0.0966713	0.831456	387
GO:0019867	cellular_component	outer membrane	115/22609	191/40888	1.08888	0.0970608	0.831456	115
GO:0031968	cellular_component	organelle outer membrane	115/22609	191/40888	1.08888	0.0970608	0.831456	115
GO:0015085	molecular_function	calcium ion transmembrane transporter activity	194/22609	329/40888	1.0664	0.0983975	0.831456	194
GO:1901681	molecular_function	sulfur compound binding	61/22609	98/40888	1.12569	0.0990762	0.831456	61
GO:0004180	molecular_function	carboxypeptidase activity	75/22609	122/40888	1.11177	0.0991193	0.831456	75
GO:0010286	biological_process	heat acclimation	68/22609	110/40888	1.11797	0.0994406	0.831456	68
GO:0031300	cellular_component	intrinsic component of organelle membrane	219/22609	373/40888	1.06182	0.0997571	0.831456	219
GO:0042759	biological_process	long-chain fatty acid biosynthetic process	23/22609	34/40888	1.22339	0.0998081	0.831456	23
GO:0043230	cellular_component	extracellular organelle	23/22609	34/40888	1.22339	0.0998081	0.831456	23
GO:0070062	cellular_component	extracellular exosome	23/22609	34/40888	1.22339	0.0998081	0.831456	23
GO:1903561	cellular_component	extracellular vesicle	23/22609	34/40888	1.22339	0.0998081	0.831456	23
GO:2000031	biological_process	regulation of salicylic acid mediated signaling pathway	38/22609	59/40888	1.16479	0.0999478	0.831456	38
GO:0004435	molecular_function	phosphatidylinositol phospholipase C activity	15/22609	21/40888	1.29177	0.101009	0.831456	15
GO:0004806	molecular_function	triglyceride lipase activity	15/22609	21/40888	1.29177	0.101009	0.831456	15
GO:0010582	biological_process	floral meristem determinacy	15/22609	21/40888	1.29177	0.101009	0.831456	15
GO:0016602	cellular_component	CCAAT-binding factor complex	15/22609	21/40888	1.29177	0.101009	0.831456	15
GO:0048354	biological_process	mucilage biosynthetic process involved in seed coat development	15/22609	21/40888	1.29177	0.101009	0.831456	15
GO:0031984	cellular_component	organelle subcompartment	817/22609	1434/40888	1.03036	0.101145	0.831456	817
GO:0006970	biological_process	response to osmotic stress	707/22609	1238/40888	1.03279	0.1012	0.831456	707
GO:0048507	biological_process	meristem development	278/22609	477/40888	1.054	0.101295	0.831456	278
GO:0009739	biological_process	response to gibberellin	79/22609	129/40888	1.10752	0.101315	0.831456	79
GO:0070181	molecular_function	small ribosomal subunit rRNA binding	26/22609	39/40888	1.20566	0.101483	0.831456	26
GO:0009736	biological_process	cytokinin-activated signaling pathway	120/22609	200/40888	1.08509	0.101652	0.831456	120
GO:0001708	biological_process	cell fate specification	32/22609	49/40888	1.18105	0.101856	0.831456	32
GO:0031418	molecular_function	L-ascorbic acid binding	32/22609	49/40888	1.18105	0.101856	0.831456	32
GO:0051260	biological_process	protein homooligomerization	32/22609	49/40888	1.18105	0.101856	0.831456	32
GO:0071248	biological_process	cellular response to metal ion	32/22609	49/40888	1.18105	0.101856	0.831456	32
GO:0048868	biological_process	pollen tube development	224/22609	382/40888	1.06047	0.102002	0.831456	224
GO:0042762	biological_process	regulation of sulfur metabolic process	29/22609	44/40888	1.19195	0.102057	0.831456	29
GO:0072598	biological_process	protein localization to chloroplast	29/22609	44/40888	1.19195	0.102057	0.831456	29
GO:0015298	molecular_function	solute:cation antiporter activity	72/22609	117/40888	1.11291	0.102091	0.831456	72
GO:1903311	biological_process	regulation of mRNA metabolic process	105/22609	174/40888	1.09133	0.102355	0.831456	105
GO:1904680	molecular_function	peptide transmembrane transporter activity	48/22609	76/40888	1.1422	0.102425	0.831456	48
GO:0031301	cellular_component	integral component of organelle membrane	216/22609	368/40888	1.0615	0.102635	0.831456	216
GO:0004664	molecular_function	prephenate dehydratase activity	8/22609	10/40888	1.44679	0.102845	0.831456	8
GO:0009831	biological_process	plant-type cell wall modification involved in multidimensional cell growth	8/22609	10/40888	1.44679	0.102845	0.831456	8
GO:0010158	biological_process	abaxial cell fate specification	8/22609	10/40888	1.44679	0.102845	0.831456	8
GO:0010358	biological_process	leaf shaping	8/22609	10/40888	1.44679	0.102845	0.831456	8
GO:0015783	biological_process	GDP-fucose transmembrane transport	8/22609	10/40888	1.44679	0.102845	0.831456	8
GO:0017091	molecular_function	AU-rich element binding	8/22609	10/40888	1.44679	0.102845	0.831456	8
GO:0030544	molecular_function	Hsp70 protein binding	8/22609	10/40888	1.44679	0.102845	0.831456	8
GO:0043972	biological_process	histone H3-K23 acetylation	8/22609	10/40888	1.44679	0.102845	0.831456	8
GO:0047769	molecular_function	arogenate dehydratase activity	8/22609	10/40888	1.44679	0.102845	0.831456	8
GO:0048442	biological_process	sepal development	8/22609	10/40888	1.44679	0.102845	0.831456	8
GO:0048451	biological_process	petal formation	8/22609	10/40888	1.44679	0.102845	0.831456	8
GO:0048464	biological_process	flower calyx development	8/22609	10/40888	1.44679	0.102845	0.831456	8
GO:0060145	biological_process	viral gene silencing in virus induced gene silencing	8/22609	10/40888	1.44679	0.102845	0.831456	8
GO:1901652	biological_process	response to peptide	8/22609	10/40888	1.44679	0.102845	0.831456	8
GO:0071396	biological_process	cellular response to lipid	470/22609	817/40888	1.04038	0.103515	0.831456	470
GO:0009409	biological_process	response to cold	448/22609	778/40888	1.04139	0.103705	0.831456	448
GO:0002252	biological_process	immune effector process	69/22609	112/40888	1.11415	0.105152	0.831456	69
GO:0070008	molecular_function	serine-type exopeptidase activity	69/22609	112/40888	1.11415	0.105152	0.831456	69
GO:0000256	biological_process	allantoin catabolic process	6/22609	7/40888	1.55013	0.105233	0.831456	6
GO:0001872	molecular_function	(1->3)-beta-D-glucan binding	6/22609	7/40888	1.55013	0.105233	0.831456	6
GO:0004134	molecular_function	4-alpha-glucanotransferase activity	6/22609	7/40888	1.55013	0.105233	0.831456	6
GO:0004198	molecular_function	calcium-dependent cysteine-type endopeptidase activity	6/22609	7/40888	1.55013	0.105233	0.831456	6
GO:0004779	molecular_function	sulfate adenylyltransferase activity	6/22609	7/40888	1.55013	0.105233	0.831456	6
GO:0004817	molecular_function	cysteine-tRNA ligase activity	6/22609	7/40888	1.55013	0.105233	0.831456	6
GO:0005652	cellular_component	nuclear lamina	6/22609	7/40888	1.55013	0.105233	0.831456	6
GO:0006423	biological_process	cysteinyl-tRNA aminoacylation	6/22609	7/40888	1.55013	0.105233	0.831456	6
GO:0006651	biological_process	diacylglycerol biosynthetic process	6/22609	7/40888	1.55013	0.105233	0.831456	6
GO:0006844	biological_process	acyl carnitine transport	6/22609	7/40888	1.55013	0.105233	0.831456	6
GO:0007050	biological_process	cell cycle arrest	6/22609	7/40888	1.55013	0.105233	0.831456	6
GO:0008192	molecular_function	RNA guanylyltransferase activity	6/22609	7/40888	1.55013	0.105233	0.831456	6
GO:0008193	molecular_function	tRNA guanylyltransferase activity	6/22609	7/40888	1.55013	0.105233	0.831456	6
GO:0008417	molecular_function	fucosyltransferase activity	6/22609	7/40888	1.55013	0.105233	0.831456	6
GO:0009001	molecular_function	serine O-acetyltransferase activity	6/22609	7/40888	1.55013	0.105233	0.831456	6
GO:0009963	biological_process	positive regulation of flavonoid biosynthetic process	6/22609	7/40888	1.55013	0.105233	0.831456	6
GO:0010360	biological_process	negative regulation of anion channel activity	6/22609	7/40888	1.55013	0.105233	0.831456	6
GO:0015152	molecular_function	glucose-6-phosphate transmembrane transporter activity	6/22609	7/40888	1.55013	0.105233	0.831456	6
GO:0015712	biological_process	hexose phosphate transport	6/22609	7/40888	1.55013	0.105233	0.831456	6
GO:0015741	biological_process	fumarate transport	6/22609	7/40888	1.55013	0.105233	0.831456	6
GO:0015760	biological_process	glucose-6-phosphate transport	6/22609	7/40888	1.55013	0.105233	0.831456	6
GO:0016412	molecular_function	serine O-acyltransferase activity	6/22609	7/40888	1.55013	0.105233	0.831456	6
GO:0017112	molecular_function	Rab guanyl-nucleotide exchange factor activity	6/22609	7/40888	1.55013	0.105233	0.831456	6
GO:0030874	cellular_component	nucleolar chromatin	6/22609	7/40888	1.55013	0.105233	0.831456	6
GO:0032104	biological_process	regulation of response to extracellular stimulus	6/22609	7/40888	1.55013	0.105233	0.831456	6
GO:0032107	biological_process	regulation of response to nutrient levels	6/22609	7/40888	1.55013	0.105233	0.831456	6
GO:0032410	biological_process	negative regulation of transporter activity	6/22609	7/40888	1.55013	0.105233	0.831456	6
GO:0032413	biological_process	negative regulation of ion transmembrane transporter activity	6/22609	7/40888	1.55013	0.105233	0.831456	6
GO:0032877	biological_process	positive regulation of DNA endoreduplication	6/22609	7/40888	1.55013	0.105233	0.831456	6
GO:0034763	biological_process	negative regulation of transmembrane transport	6/22609	7/40888	1.55013	0.105233	0.831456	6
GO:0034766	biological_process	negative regulation of ion transmembrane transport	6/22609	7/40888	1.55013	0.105233	0.831456	6
GO:0035515	molecular_function	oxidative RNA demethylase activity	6/22609	7/40888	1.55013	0.105233	0.831456	6
GO:0040014	biological_process	regulation of multicellular organism growth	6/22609	7/40888	1.55013	0.105233	0.831456	6
GO:0044232	cellular_component	organelle membrane contact site	6/22609	7/40888	1.55013	0.105233	0.831456	6
GO:0045026	biological_process	plasma membrane fusion	6/22609	7/40888	1.55013	0.105233	0.831456	6
GO:0045740	biological_process	positive regulation of DNA replication	6/22609	7/40888	1.55013	0.105233	0.831456	6
GO:0046339	biological_process	diacylglycerol metabolic process	6/22609	7/40888	1.55013	0.105233	0.831456	6
GO:0048497	biological_process	maintenance of floral organ identity	6/22609	7/40888	1.55013	0.105233	0.831456	6
GO:0052746	biological_process	inositol phosphorylation	6/22609	7/40888	1.55013	0.105233	0.831456	6
GO:0061936	biological_process	fusion of sperm to egg plasma membrane involved in double fertilization forming a zygote and endosperm	6/22609	7/40888	1.55013	0.105233	0.831456	6
GO:0070505	cellular_component	pollen coat	6/22609	7/40888	1.55013	0.105233	0.831456	6
GO:0070696	molecular_function	transmembrane receptor protein serine/threonine kinase binding	6/22609	7/40888	1.55013	0.105233	0.831456	6
GO:0071561	cellular_component	nucleus-vacuole junction	6/22609	7/40888	1.55013	0.105233	0.831456	6
GO:0090306	biological_process	spindle assembly involved in meiosis	6/22609	7/40888	1.55013	0.105233	0.831456	6
GO:0090628	biological_process	plant epidermal cell fate specification	6/22609	7/40888	1.55013	0.105233	0.831456	6
GO:0090700	biological_process	maintenance of plant organ identity	6/22609	7/40888	1.55013	0.105233	0.831456	6
GO:0102500	molecular_function	beta-maltose 4-alpha-glucanotransferase activity	6/22609	7/40888	1.55013	0.105233	0.831456	6
GO:1903792	biological_process	negative regulation of anion transport	6/22609	7/40888	1.55013	0.105233	0.831456	6
GO:1903960	biological_process	negative regulation of anion transmembrane transport	6/22609	7/40888	1.55013	0.105233	0.831456	6
GO:1904292	biological_process	regulation of ERAD pathway	6/22609	7/40888	1.55013	0.105233	0.831456	6
GO:1904961	biological_process	quiescent center organization	6/22609	7/40888	1.55013	0.105233	0.831456	6
GO:1990538	molecular_function	xylan O-acetyltransferase activity	6/22609	7/40888	1.55013	0.105233	0.831456	6
GO:1990931	molecular_function	RNA N6-methyladenosine dioxygenase activity	6/22609	7/40888	1.55013	0.105233	0.831456	6
GO:1990937	biological_process	xylan acetylation	6/22609	7/40888	1.55013	0.105233	0.831456	6
GO:2000105	biological_process	positive regulation of DNA-dependent DNA replication	6/22609	7/40888	1.55013	0.105233	0.831456	6
GO:0015074	biological_process	DNA integration	583/22609	1018/40888	1.0357	0.105335	0.831545	583
GO:0071368	biological_process	cellular response to cytokinin stimulus	121/22609	202/40888	1.0833	0.105519	0.832275	121
GO:0022857	molecular_function	transmembrane transporter activity	1619/22609	2869/40888	1.02054	0.105669	0.832738	1619
GO:0006906	biological_process	vesicle fusion	52/22609	83/40888	1.13303	0.107209	0.842876	52
GO:0003682	molecular_function	chromatin binding	137/22609	230/40888	1.07723	0.107257	0.842876	137
GO:0010091	biological_process	trichome branching	73/22609	119/40888	1.10941	0.107644	0.842876	73
GO:0090174	biological_process	organelle membrane fusion	73/22609	119/40888	1.10941	0.107644	0.842876	73
GO:0010088	biological_process	phloem development	18/22609	26/40888	1.25203	0.107833	0.842876	18
GO:0015174	molecular_function	basic amino acid transmembrane transporter activity	18/22609	26/40888	1.25203	0.107833	0.842876	18
GO:0015189	molecular_function	L-lysine transmembrane transporter activity	18/22609	26/40888	1.25203	0.107833	0.842876	18
GO:0018364	biological_process	peptidyl-glutamine methylation	18/22609	26/40888	1.25203	0.107833	0.842876	18
GO:0051348	biological_process	negative regulation of transferase activity	18/22609	26/40888	1.25203	0.107833	0.842876	18
GO:0048511	biological_process	rhythmic process	149/22609	251/40888	1.07356	0.107881	0.842876	149
GO:0043085	biological_process	positive regulation of catalytic activity	84/22609	138/40888	1.10082	0.108302	0.845442	84
GO:0005484	molecular_function	SNAP receptor activity	39/22609	61/40888	1.15624	0.10887	0.848538	39
GO:0006816	biological_process	calcium ion transport	118/22609	197/40888	1.08325	0.108885	0.848538	118
GO:0022836	molecular_function	gated channel activity	99/22609	164/40888	1.09171	0.109006	0.848759	99
GO:0044183	molecular_function	protein folding chaperone	162/22609	274/40888	1.06925	0.111348	0.863826	162
GO:0060548	biological_process	negative regulation of cell death	63/22609	102/40888	1.117	0.111545	0.863826	63
GO:0009962	biological_process	regulation of flavonoid biosynthetic process	21/22609	31/40888	1.2251	0.111547	0.863826	21
GO:0032119	biological_process	sequestering of zinc ion	21/22609	31/40888	1.2251	0.111547	0.863826	21
GO:0043181	biological_process	vacuolar sequestering	21/22609	31/40888	1.2251	0.111547	0.863826	21
GO:0070072	biological_process	vacuolar proton-transporting V-type ATPase complex assembly	21/22609	31/40888	1.2251	0.111547	0.863826	21
GO:0003333	biological_process	amino acid transmembrane transport	33/22609	51/40888	1.1702	0.112183	0.863826	33
GO:0010192	biological_process	mucilage biosynthetic process	33/22609	51/40888	1.1702	0.112183	0.863826	33
GO:0006116	biological_process	NADH oxidation	13/22609	18/40888	1.30613	0.112364	0.863826	13
GO:0007205	biological_process	protein kinase C-activating G protein-coupled receptor signaling pathway	13/22609	18/40888	1.30613	0.112364	0.863826	13
GO:0019210	molecular_function	kinase inhibitor activity	13/22609	18/40888	1.30613	0.112364	0.863826	13
GO:0030026	biological_process	cellular manganese ion homeostasis	13/22609	18/40888	1.30613	0.112364	0.863826	13
GO:0032541	cellular_component	cortical endoplasmic reticulum	13/22609	18/40888	1.30613	0.112364	0.863826	13
GO:0051574	biological_process	positive regulation of histone H3-K9 methylation	13/22609	18/40888	1.30613	0.112364	0.863826	13
GO:1900368	biological_process	regulation of RNA interference	13/22609	18/40888	1.30613	0.112364	0.863826	13
GO:0016604	cellular_component	nuclear body	191/22609	325/40888	1.06283	0.113171	0.867243	191
GO:0010082	biological_process	regulation of root meristem growth	30/22609	46/40888	1.17945	0.113257	0.867243	30
GO:0009884	molecular_function	cytokinin receptor activity	24/22609	36/40888	1.20566	0.113284	0.867243	24
GO:0042726	biological_process	flavin-containing compound metabolic process	24/22609	36/40888	1.20566	0.113284	0.867243	24
GO:2000022	biological_process	regulation of jasmonic acid mediated signaling pathway	24/22609	36/40888	1.20566	0.113284	0.867243	24
GO:0010639	biological_process	negative regulation of organelle organization	85/22609	140/40888	1.09801	0.113429	0.867623	85
GO:0000919	biological_process	cell plate assembly	27/22609	41/40888	1.19095	0.113715	0.867623	27
GO:0009407	biological_process	toxin catabolic process	27/22609	41/40888	1.19095	0.113715	0.867623	27
GO:0009554	biological_process	megasporogenesis	27/22609	41/40888	1.19095	0.113715	0.867623	27
GO:0072665	biological_process	protein localization to vacuole	53/22609	85/40888	1.12764	0.114446	0.871742	53
GO:0072666	biological_process	establishment of protein localization to vacuole	53/22609	85/40888	1.12764	0.114446	0.871742	53
GO:0015631	molecular_function	tubulin binding	250/22609	429/40888	1.05389	0.115054	0.875639	250
GO:0017025	molecular_function	TBP-class protein binding	43/22609	68/40888	1.1436	0.115356	0.877207	43
GO:0016772	molecular_function	transferase activity, transferring phosphorus-containing groups	2668/22609	4755/40888	1.01473	0.117769	0.894809	2668
GO:0000030	molecular_function	mannosyltransferase activity	40/22609	63/40888	1.14824	0.117956	0.89548	40
GO:2000243	biological_process	positive regulation of reproductive process	57/22609	92/40888	1.12047	0.118298	0.89733	57
GO:0006812	biological_process	cation transport	488/22609	851/40888	1.03706	0.118838	0.900573	488
GO:0048437	biological_process	floral organ development	222/22609	380/40888	1.05654	0.118923	0.900573	222
GO:0005795	cellular_component	Golgi stack	214/22609	366/40888	1.05742	0.119958	0.90685	214
GO:0003993	molecular_function	acid phosphatase activity	37/22609	58/40888	1.15369	0.120421	0.90685	37
GO:0019372	biological_process	lipoxygenase pathway	37/22609	58/40888	1.15369	0.120421	0.90685	37
GO:0008017	molecular_function	microtubule binding	231/22609	396/40888	1.05495	0.120598	0.90685	231
GO:0006521	biological_process	regulation of cellular amino acid metabolic process	16/22609	23/40888	1.25808	0.120736	0.90685	16
GO:0010022	biological_process	meristem determinacy	16/22609	23/40888	1.25808	0.120736	0.90685	16
GO:0033238	biological_process	regulation of cellular amine metabolic process	16/22609	23/40888	1.25808	0.120736	0.90685	16
GO:0051123	biological_process	RNA polymerase II preinitiation complex assembly	16/22609	23/40888	1.25808	0.120736	0.90685	16
GO:0070897	biological_process	transcription preinitiation complex assembly	16/22609	23/40888	1.25808	0.120736	0.90685	16
GO:0009743	biological_process	response to carbohydrate	265/22609	456/40888	1.05098	0.120814	0.90685	265
GO:0033044	biological_process	regulation of chromosome organization	117/22609	196/40888	1.07955	0.120847	0.90685	117
GO:0072511	biological_process	divalent inorganic cation transport	169/22609	287/40888	1.06493	0.121221	0.90891	169
GO:0000910	biological_process	cytokinesis	125/22609	210/40888	1.07648	0.121559	0.910276	125
GO:0005797	cellular_component	Golgi medial cisterna	61/22609	99/40888	1.11432	0.121603	0.910276	61
GO:0010035	biological_process	response to inorganic substance	1402/22609	2484/40888	1.02073	0.121997	0.912474	1402
GO:0031060	biological_process	regulation of histone methylation	34/22609	53/40888	1.16016	0.12268	0.916264	34
GO:0005216	molecular_function	ion channel activity	102/22609	170/40888	1.08509	0.122966	0.916264	102
GO:0055075	biological_process	potassium ion homeostasis	44/22609	70/40888	1.13676	0.124	0.916264	44
GO:2001020	biological_process	regulation of response to DNA damage stimulus	44/22609	70/40888	1.13676	0.124	0.916264	44
GO:0042430	biological_process	indole-containing compound metabolic process	65/22609	106/40888	1.10898	0.124443	0.916264	65
GO:0010329	molecular_function	auxin efflux transmembrane transporter activity	31/22609	48/40888	1.16798	0.124629	0.916264	31
GO:0043243	biological_process	positive regulation of protein complex disassembly	31/22609	48/40888	1.16798	0.124629	0.916264	31
GO:0051238	biological_process	sequestering of metal ion	31/22609	48/40888	1.16798	0.124629	0.916264	31
GO:0000340	molecular_function	RNA 7-methylguanosine cap binding	19/22609	28/40888	1.22719	0.124968	0.916264	19
GO:0019903	molecular_function	protein phosphatase binding	19/22609	28/40888	1.22719	0.124968	0.916264	19
GO:0003876	molecular_function	AMP deaminase activity	11/22609	15/40888	1.32622	0.125018	0.916264	11
GO:0004370	molecular_function	glycerol kinase activity	11/22609	15/40888	1.32622	0.125018	0.916264	11
GO:0006152	biological_process	purine nucleoside catabolic process	11/22609	15/40888	1.32622	0.125018	0.916264	11
GO:0009594	biological_process	detection of nutrient	11/22609	15/40888	1.32622	0.125018	0.916264	11
GO:0010385	molecular_function	double-stranded methylated DNA binding	11/22609	15/40888	1.32622	0.125018	0.916264	11
GO:0031112	biological_process	positive regulation of microtubule polymerization or depolymerization	11/22609	15/40888	1.32622	0.125018	0.916264	11
GO:0031298	cellular_component	replication fork protection complex	11/22609	15/40888	1.32622	0.125018	0.916264	11
GO:0032264	biological_process	IMP salvage	11/22609	15/40888	1.32622	0.125018	0.916264	11
GO:0046167	biological_process	glycerol-3-phosphate biosynthetic process	11/22609	15/40888	1.32622	0.125018	0.916264	11
GO:0047623	molecular_function	adenosine-phosphate deaminase activity	11/22609	15/40888	1.32622	0.125018	0.916264	11
GO:0060148	biological_process	positive regulation of posttranscriptional gene silencing	11/22609	15/40888	1.32622	0.125018	0.916264	11
GO:0060964	biological_process	regulation of gene silencing by miRNA	11/22609	15/40888	1.32622	0.125018	0.916264	11
GO:0070206	biological_process	protein trimerization	11/22609	15/40888	1.32622	0.125018	0.916264	11
GO:0072531	biological_process	pyrimidine-containing compound transmembrane transport	11/22609	15/40888	1.32622	0.125018	0.916264	11
GO:0090376	biological_process	seed trichome differentiation	11/22609	15/40888	1.32622	0.125018	0.916264	11
GO:0042435	biological_process	indole-containing compound biosynthetic process	51/22609	82/40888	1.12479	0.125389	0.918244	51
GO:0051273	biological_process	beta-glucan metabolic process	150/22609	254/40888	1.068	0.125773	0.919927	150
GO:0002697	biological_process	regulation of immune effector process	28/22609	43/40888	1.17762	0.126119	0.919927	28
GO:0050688	biological_process	regulation of defense response to virus	28/22609	43/40888	1.17762	0.126119	0.919927	28
GO:0005253	molecular_function	anion channel activity	22/22609	33/40888	1.20566	0.126728	0.919927	22
GO:0015075	molecular_function	ion transmembrane transporter activity	983/22609	1735/40888	1.02463	0.126781	0.919927	983
GO:0005085	molecular_function	guanyl-nucleotide exchange factor activity	69/22609	113/40888	1.1043	0.126882	0.919927	69
GO:0009082	biological_process	branched-chain amino acid biosynthetic process	69/22609	113/40888	1.1043	0.126882	0.919927	69
GO:0004089	molecular_function	carbonate dehydratase activity	25/22609	38/40888	1.18979	0.126932	0.919927	25
GO:0009085	biological_process	lysine biosynthetic process	25/22609	38/40888	1.18979	0.126932	0.919927	25
GO:0009835	biological_process	fruit ripening	25/22609	38/40888	1.18979	0.126932	0.919927	25
GO:0009877	biological_process	nodulation	25/22609	38/40888	1.18979	0.126932	0.919927	25
GO:0051592	biological_process	response to calcium ion	25/22609	38/40888	1.18979	0.126932	0.919927	25
GO:1900864	biological_process	mitochondrial RNA modification	25/22609	38/40888	1.18979	0.126932	0.919927	25
GO:0032527	biological_process	protein exit from endoplasmic reticulum	41/22609	65/40888	1.14074	0.12718	0.920994	41
GO:0008536	molecular_function	Ran GTPase binding	55/22609	89/40888	1.1176	0.12927	0.935383	55
GO:0044452	cellular_component	nucleolar part	139/22609	235/40888	1.0697	0.129943	0.939508	139
GO:0006986	biological_process	response to unfolded protein	243/22609	418/40888	1.05134	0.130394	0.942024	243
GO:0004252	molecular_function	serine-type endopeptidase activity	96/22609	160/40888	1.08509	0.131233	0.947009	96
GO:0034655	biological_process	nucleobase-containing compound catabolic process	282/22609	487/40888	1.04721	0.131292	0.947009	282
GO:0030154	biological_process	cell differentiation	734/22609	1291/40888	1.02822	0.131878	0.95048	734
GO:0048609	biological_process	multicellular organismal reproductive process	160/22609	272/40888	1.06381	0.132681	0.955349	160
GO:0071470	biological_process	cellular response to osmotic stress	45/22609	72/40888	1.1303	0.132763	0.955349	45
GO:0044403	biological_process	symbiotic process	189/22609	323/40888	1.05821	0.132947	0.955918	189
GO:0071216	biological_process	cellular response to biotic stimulus	52/22609	84/40888	1.11954	0.133277	0.956271	52
GO:1901879	biological_process	regulation of protein depolymerization	52/22609	84/40888	1.11954	0.133277	0.956271	52
GO:0010597	biological_process	green leaf volatile biosynthetic process	35/22609	55/40888	1.15085	0.133311	0.956271	35
GO:0009738	biological_process	abscisic acid-activated signaling pathway	318/22609	551/40888	1.04373	0.134203	0.957774	318
GO:0006073	biological_process	cellular glucan metabolic process	253/22609	436/40888	1.04942	0.134411	0.957774	253
GO:0044042	biological_process	glucan metabolic process	253/22609	436/40888	1.04942	0.134411	0.957774	253
GO:0001671	molecular_function	ATPase activator activity	14/22609	20/40888	1.26594	0.13556	0.957774	14
GO:0004535	molecular_function	poly(A)-specific ribonuclease activity	14/22609	20/40888	1.26594	0.13556	0.957774	14
GO:0009331	cellular_component	glycerol-3-phosphate dehydrogenase complex	14/22609	20/40888	1.26594	0.13556	0.957774	14
GO:0017022	molecular_function	myosin binding	14/22609	20/40888	1.26594	0.13556	0.957774	14
GO:0048441	biological_process	petal development	14/22609	20/40888	1.26594	0.13556	0.957774	14
GO:0048465	biological_process	corolla development	14/22609	20/40888	1.26594	0.13556	0.957774	14
GO:0048639	biological_process	positive regulation of developmental growth	14/22609	20/40888	1.26594	0.13556	0.957774	14
GO:0052314	biological_process	phytoalexin metabolic process	14/22609	20/40888	1.26594	0.13556	0.957774	14
GO:0052315	biological_process	phytoalexin biosynthetic process	14/22609	20/40888	1.26594	0.13556	0.957774	14
GO:0070920	biological_process	regulation of production of small RNA involved in gene silencing by RNA	14/22609	20/40888	1.26594	0.13556	0.957774	14
GO:0032886	biological_process	regulation of microtubule-based process	32/22609	50/40888	1.15743	0.136129	0.957774	32
GO:0048571	biological_process	long-day photoperiodism	32/22609	50/40888	1.15743	0.136129	0.957774	32
GO:1901292	biological_process	nucleoside phosphate catabolic process	42/22609	67/40888	1.13368	0.136521	0.957774	42
GO:0006304	biological_process	DNA modification	78/22609	129/40888	1.0935	0.136752	0.957774	78
GO:0044728	biological_process	DNA methylation or demethylation	78/22609	129/40888	1.0935	0.136752	0.957774	78
GO:0002679	biological_process	respiratory burst involved in defense response	9/22609	12/40888	1.35636	0.13894	0.957774	9
GO:0004368	molecular_function	glycerol-3-phosphate dehydrogenase (quinone) activity	9/22609	12/40888	1.35636	0.13894	0.957774	9
GO:0005845	cellular_component	mRNA cap binding complex	9/22609	12/40888	1.35636	0.13894	0.957774	9
GO:0006029	biological_process	proteoglycan metabolic process	9/22609	12/40888	1.35636	0.13894	0.957774	9
GO:0006127	biological_process	glycerophosphate shuttle	9/22609	12/40888	1.35636	0.13894	0.957774	9
GO:0016901	molecular_function	oxidoreductase activity, acting on the CH-OH group of donors, quinone or similar compound as acceptor	9/22609	12/40888	1.35636	0.13894	0.957774	9
GO:0032147	biological_process	activation of protein kinase activity	9/22609	12/40888	1.35636	0.13894	0.957774	9
GO:0042547	biological_process	cell wall modification involved in multidimensional cell growth	9/22609	12/40888	1.35636	0.13894	0.957774	9
GO:0045730	biological_process	respiratory burst	9/22609	12/40888	1.35636	0.13894	0.957774	9
GO:0051766	molecular_function	inositol trisphosphate kinase activity	9/22609	12/40888	1.35636	0.13894	0.957774	9
GO:0052590	molecular_function	sn-glycerol-3-phosphate:ubiquinone oxidoreductase activity	9/22609	12/40888	1.35636	0.13894	0.957774	9
GO:0052591	molecular_function	sn-glycerol-3-phosphate:ubiquinone-8 oxidoreductase activity	9/22609	12/40888	1.35636	0.13894	0.957774	9
GO:0052725	molecular_function	inositol-1,3,4-trisphosphate 6-kinase activity	9/22609	12/40888	1.35636	0.13894	0.957774	9
GO:0060321	biological_process	acceptance of pollen	9/22609	12/40888	1.35636	0.13894	0.957774	9
GO:0099094	molecular_function	ligand-gated cation channel activity	9/22609	12/40888	1.35636	0.13894	0.957774	9
GO:1901527	biological_process	abscisic acid-activated signaling pathway involved in stomatal movement	9/22609	12/40888	1.35636	0.13894	0.957774	9
GO:1903578	biological_process	regulation of ATP metabolic process	9/22609	12/40888	1.35636	0.13894	0.957774	9
GO:0022604	biological_process	regulation of cell morphogenesis	166/22609	283/40888	1.06081	0.139619	0.957774	166
GO:0048316	biological_process	seed development	628/22609	1103/40888	1.02967	0.139954	0.957774	628
GO:0009166	biological_process	nucleotide catabolic process	39/22609	62/40888	1.13759	0.140295	0.957774	39
GO:0009313	biological_process	oligosaccharide catabolic process	17/22609	25/40888	1.22977	0.14041	0.957774	17
GO:0010124	biological_process	phenylacetate catabolic process	17/22609	25/40888	1.22977	0.14041	0.957774	17
GO:0035067	biological_process	negative regulation of histone acetylation	17/22609	25/40888	1.22977	0.14041	0.957774	17
GO:0042178	biological_process	xenobiotic catabolic process	17/22609	25/40888	1.22977	0.14041	0.957774	17
GO:0048235	biological_process	pollen sperm cell differentiation	17/22609	25/40888	1.22977	0.14041	0.957774	17
GO:0061980	molecular_function	regulatory RNA binding	17/22609	25/40888	1.22977	0.14041	0.957774	17
GO:1901984	biological_process	negative regulation of protein acetylation	17/22609	25/40888	1.22977	0.14041	0.957774	17
GO:2000757	biological_process	negative regulation of peptidyl-lysine acetylation	17/22609	25/40888	1.22977	0.14041	0.957774	17
GO:0043271	biological_process	negative regulation of ion transport	26/22609	40/40888	1.17551	0.140677	0.957774	26
GO:0009639	biological_process	response to red or far red light	183/22609	313/40888	1.05736	0.140923	0.957774	183
GO:0009251	biological_process	glucan catabolic process	53/22609	86/40888	1.11453	0.141261	0.957774	53
GO:0044247	biological_process	cellular polysaccharide catabolic process	53/22609	86/40888	1.11453	0.141261	0.957774	53
GO:0010232	biological_process	vascular transport	23/22609	35/40888	1.18843	0.141978	0.957774	23
GO:0010233	biological_process	phloem transport	23/22609	35/40888	1.18843	0.141978	0.957774	23
GO:0042182	biological_process	ketone catabolic process	23/22609	35/40888	1.18843	0.141978	0.957774	23
GO:0004491	molecular_function	methylmalonate-semialdehyde dehydrogenase (acylating) activity	20/22609	30/40888	1.20566	0.142123	0.957774	20
GO:0005942	cellular_component	phosphatidylinositol 3-kinase complex	20/22609	30/40888	1.20566	0.142123	0.957774	20
GO:0009692	biological_process	ethylene metabolic process	20/22609	30/40888	1.20566	0.142123	0.957774	20
GO:0009693	biological_process	ethylene biosynthetic process	20/22609	30/40888	1.20566	0.142123	0.957774	20
GO:0018478	molecular_function	malonate-semialdehyde dehydrogenase (acetylating) activity	20/22609	30/40888	1.20566	0.142123	0.957774	20
GO:0035032	cellular_component	phosphatidylinositol 3-kinase complex, class III	20/22609	30/40888	1.20566	0.142123	0.957774	20
GO:0043449	biological_process	cellular alkene metabolic process	20/22609	30/40888	1.20566	0.142123	0.957774	20
GO:0043450	biological_process	alkene biosynthetic process	20/22609	30/40888	1.20566	0.142123	0.957774	20
GO:1900673	biological_process	olefin metabolic process	20/22609	30/40888	1.20566	0.142123	0.957774	20
GO:1900674	biological_process	olefin biosynthetic process	20/22609	30/40888	1.20566	0.142123	0.957774	20
GO:0043878	molecular_function	glyceraldehyde-3-phosphate dehydrogenase (NAD+) (non-phosphorylating) activity	64/22609	105/40888	1.10231	0.142345	0.957774	64
GO:0060968	biological_process	regulation of gene silencing	83/22609	138/40888	1.08771	0.143983	0.957774	83
GO:0004724	molecular_function	magnesium-dependent protein serine/threonine phosphatase activity	36/22609	57/40888	1.1422	0.144045	0.957774	36
GO:0006559	biological_process	L-phenylalanine catabolic process	36/22609	57/40888	1.1422	0.144045	0.957774	36
GO:0016840	molecular_function	carbon-nitrogen lyase activity	36/22609	57/40888	1.1422	0.144045	0.957774	36
GO:1902222	biological_process	erythrose 4-phosphate/phosphoenolpyruvate family amino acid catabolic process	36/22609	57/40888	1.1422	0.144045	0.957774	36
GO:0009266	biological_process	response to temperature stimulus	902/22609	1593/40888	1.02401	0.144189	0.957774	902
GO:0042887	molecular_function	amide transmembrane transporter activity	57/22609	93/40888	1.10843	0.144485	0.957774	57
GO:0006638	biological_process	neutral lipid metabolic process	43/22609	69/40888	1.12703	0.145959	0.957774	43
GO:0006639	biological_process	acylglycerol metabolic process	43/22609	69/40888	1.12703	0.145959	0.957774	43
GO:0031201	cellular_component	SNARE complex	43/22609	69/40888	1.12703	0.145959	0.957774	43
GO:0140296	molecular_function	general transcription initiation factor binding	43/22609	69/40888	1.12703	0.145959	0.957774	43
GO:1901401	biological_process	regulation of tetrapyrrole metabolic process	61/22609	100/40888	1.10317	0.147176	0.957774	61
GO:0004190	molecular_function	aspartic-type endopeptidase activity	637/22609	1120/40888	1.02857	0.147305	0.957774	637
GO:0070001	molecular_function	aspartic-type peptidase activity	637/22609	1120/40888	1.02857	0.147305	0.957774	637
GO:0000288	biological_process	nuclear-transcribed mRNA catabolic process, deadenylation-dependent decay	33/22609	52/40888	1.14769	0.147718	0.957774	33
GO:0010218	biological_process	response to far red light	33/22609	52/40888	1.14769	0.147718	0.957774	33
GO:0016281	cellular_component	eukaryotic translation initiation factor 4F complex	33/22609	52/40888	1.14769	0.147718	0.957774	33
GO:0052742	molecular_function	phosphatidylinositol kinase activity	33/22609	52/40888	1.14769	0.147718	0.957774	33
GO:0006955	biological_process	immune response	427/22609	746/40888	1.03515	0.149036	0.957774	427
GO:0015985	biological_process	energy coupled proton transport, down electrochemical gradient	54/22609	88/40888	1.10975	0.149328	0.957774	54
GO:0015986	biological_process	ATP synthesis coupled proton transport	54/22609	88/40888	1.10975	0.149328	0.957774	54
GO:0048017	biological_process	inositol lipid-mediated signaling	40/22609	64/40888	1.1303	0.150374	0.957774	40
GO:0009074	biological_process	aromatic amino acid family catabolic process	47/22609	76/40888	1.1184	0.15058	0.957774	47
GO:0009834	biological_process	plant-type secondary cell wall biogenesis	47/22609	76/40888	1.1184	0.15058	0.957774	47
GO:0006553	biological_process	lysine metabolic process	30/22609	47/40888	1.15435	0.151231	0.957774	30
GO:0052546	biological_process	cell wall pectin metabolic process	30/22609	47/40888	1.15435	0.151231	0.957774	30
GO:0051274	biological_process	beta-glucan biosynthetic process	124/22609	210/40888	1.06787	0.152168	0.957774	124
GO:0006790	biological_process	sulfur compound metabolic process	552/22609	969/40888	1.03022	0.152401	0.957774	552
GO:0004072	molecular_function	aspartate kinase activity	12/22609	17/40888	1.27658	0.152721	0.957774	12
GO:0004133	molecular_function	glycogen debranching enzyme activity	12/22609	17/40888	1.27658	0.152721	0.957774	12
GO:0005719	cellular_component	nuclear euchromatin	12/22609	17/40888	1.27658	0.152721	0.957774	12
GO:0008146	molecular_function	sulfotransferase activity	12/22609	17/40888	1.27658	0.152721	0.957774	12
GO:0031543	molecular_function	peptidyl-proline dioxygenase activity	12/22609	17/40888	1.27658	0.152721	0.957774	12
GO:0033356	biological_process	UDP-L-arabinose metabolic process	12/22609	17/40888	1.27658	0.152721	0.957774	12
GO:0036080	molecular_function	purine nucleotide-sugar transmembrane transporter activity	12/22609	17/40888	1.27658	0.152721	0.957774	12
GO:0048439	biological_process	flower morphogenesis	12/22609	17/40888	1.27658	0.152721	0.957774	12
GO:1901618	molecular_function	organic hydroxy compound transmembrane transporter activity	12/22609	17/40888	1.27658	0.152721	0.957774	12
GO:0000774	molecular_function	adenyl-nucleotide exchange factor activity	7/22609	9/40888	1.4066	0.153682	0.957774	7
GO:0003939	molecular_function	L-iditol 2-dehydrogenase activity	7/22609	9/40888	1.4066	0.153682	0.957774	7
GO:0004377	molecular_function	GDP-Man:Man3GlcNAc2-PP-Dol alpha-1,2-mannosyltransferase activity	7/22609	9/40888	1.4066	0.153682	0.957774	7
GO:0005366	molecular_function	myo-inositol:proton symporter activity	7/22609	9/40888	1.4066	0.153682	0.957774	7
GO:0010338	biological_process	leaf formation	7/22609	9/40888	1.4066	0.153682	0.957774	7
GO:0010394	biological_process	homogalacturonan metabolic process	7/22609	9/40888	1.4066	0.153682	0.957774	7
GO:0010447	biological_process	response to acidic pH	7/22609	9/40888	1.4066	0.153682	0.957774	7
GO:0015697	biological_process	quaternary ammonium group transport	7/22609	9/40888	1.4066	0.153682	0.957774	7
GO:0016233	biological_process	telomere capping	7/22609	9/40888	1.4066	0.153682	0.957774	7
GO:0017077	molecular_function	oxidative phosphorylation uncoupler activity	7/22609	9/40888	1.4066	0.153682	0.957774	7
GO:0019776	molecular_function	Atg8 ligase activity	7/22609	9/40888	1.4066	0.153682	0.957774	7
GO:0034263	biological_process	positive regulation of autophagy in response to ER overload	7/22609	9/40888	1.4066	0.153682	0.957774	7
GO:0040009	biological_process	regulation of growth rate	7/22609	9/40888	1.4066	0.153682	0.957774	7
GO:0045335	cellular_component	phagocytic vesicle	7/22609	9/40888	1.4066	0.153682	0.957774	7
GO:0046526	molecular_function	D-xylulose reductase activity	7/22609	9/40888	1.4066	0.153682	0.957774	7
GO:0050255	molecular_function	ribitol 2-dehydrogenase activity	7/22609	9/40888	1.4066	0.153682	0.957774	7
GO:0050291	molecular_function	sphingosine N-acyltransferase activity	7/22609	9/40888	1.4066	0.153682	0.957774	7
GO:0050614	molecular_function	delta24-sterol reductase activity	7/22609	9/40888	1.4066	0.153682	0.957774	7
GO:0051291	biological_process	protein heterooligomerization	7/22609	9/40888	1.4066	0.153682	0.957774	7
GO:0090065	biological_process	regulation of production of siRNA involved in RNA interference	7/22609	9/40888	1.4066	0.153682	0.957774	7
GO:1901332	biological_process	negative regulation of lateral root development	7/22609	9/40888	1.4066	0.153682	0.957774	7
GO:1903340	biological_process	positive regulation of cell wall organization or biogenesis	7/22609	9/40888	1.4066	0.153682	0.957774	7
GO:2000038	biological_process	regulation of stomatal complex development	7/22609	9/40888	1.4066	0.153682	0.957774	7
GO:2000468	biological_process	regulation of peroxidase activity	7/22609	9/40888	1.4066	0.153682	0.957774	7
GO:0010074	biological_process	maintenance of meristem identity	77/22609	128/40888	1.08792	0.154086	0.957774	77
GO:2000028	biological_process	regulation of photoperiodism, flowering	77/22609	128/40888	1.08792	0.154086	0.957774	77
GO:0045036	biological_process	protein targeting to chloroplast	27/22609	42/40888	1.1626	0.15446	0.957774	27
GO:0071230	biological_process	cellular response to amino acid stimulus	27/22609	42/40888	1.1626	0.15446	0.957774	27
GO:0072596	biological_process	establishment of protein localization to chloroplast	27/22609	42/40888	1.1626	0.15446	0.957774	27
GO:0140104	molecular_function	molecular carrier activity	27/22609	42/40888	1.1626	0.15446	0.957774	27
GO:0070180	molecular_function	large ribosomal subunit rRNA binding	62/22609	102/40888	1.09927	0.154598	0.957774	62
GO:0036452	cellular_component	ESCRT complex	37/22609	59/40888	1.13413	0.154854	0.957774	37
GO:0072583	biological_process	clathrin-dependent endocytosis	37/22609	59/40888	1.13413	0.154854	0.957774	37
GO:0043069	biological_process	negative regulation of programmed cell death	44/22609	71/40888	1.12075	0.155473	0.957774	44
GO:1903050	biological_process	regulation of proteolysis involved in cellular protein catabolic process	44/22609	71/40888	1.12075	0.155473	0.957774	44
GO:1903362	biological_process	regulation of cellular protein catabolic process	44/22609	71/40888	1.12075	0.155473	0.957774	44
GO:0048438	biological_process	floral whorl development	183/22609	314/40888	1.05399	0.155968	0.957774	183
GO:0042537	biological_process	benzene-containing compound metabolic process	66/22609	109/40888	1.09504	0.156563	0.957774	66
GO:1903008	biological_process	organelle disassembly	66/22609	109/40888	1.09504	0.156563	0.957774	66
GO:0031329	biological_process	regulation of cellular catabolic process	158/22609	270/40888	1.0583	0.156839	0.957774	158
GO:1905268	biological_process	negative regulation of chromatin organization	24/22609	37/40888	1.17307	0.157215	0.957774	24
GO:0016679	molecular_function	oxidoreductase activity, acting on diphenols and related substances as donors	55/22609	90/40888	1.10518	0.157467	0.957774	55
GO:0005615	cellular_component	extracellular space	154/22609	263/40888	1.05896	0.157531	0.957774	154
GO:0004020	molecular_function	adenylylsulfate kinase activity	15/22609	22/40888	1.23306	0.158318	0.957774	15
GO:0004742	molecular_function	dihydrolipoyllysine-residue acetyltransferase activity	15/22609	22/40888	1.23306	0.158318	0.957774	15
GO:0010563	biological_process	negative regulation of phosphorus metabolic process	15/22609	22/40888	1.23306	0.158318	0.957774	15
GO:0015181	molecular_function	arginine transmembrane transporter activity	15/22609	22/40888	1.23306	0.158318	0.957774	15
GO:0016418	molecular_function	S-acetyltransferase activity	15/22609	22/40888	1.23306	0.158318	0.957774	15
GO:0045936	biological_process	negative regulation of phosphate metabolic process	15/22609	22/40888	1.23306	0.158318	0.957774	15
GO:0070370	biological_process	cellular heat acclimation	15/22609	22/40888	1.23306	0.158318	0.957774	15
GO:0070814	biological_process	hydrogen sulfide biosynthetic process	15/22609	22/40888	1.23306	0.158318	0.957774	15
GO:0006089	biological_process	lactate metabolic process	21/22609	32/40888	1.18682	0.159188	0.957774	21
GO:0009438	biological_process	methylglyoxal metabolic process	21/22609	32/40888	1.18682	0.159188	0.957774	21
GO:0010037	biological_process	response to carbon dioxide	21/22609	32/40888	1.18682	0.159188	0.957774	21
GO:0016024	biological_process	CDP-diacylglycerol biosynthetic process	21/22609	32/40888	1.18682	0.159188	0.957774	21
GO:0016881	molecular_function	acid-amino acid ligase activity	21/22609	32/40888	1.18682	0.159188	0.957774	21
GO:0046341	biological_process	CDP-diacylglycerol metabolic process	21/22609	32/40888	1.18682	0.159188	0.957774	21
GO:0051596	biological_process	methylglyoxal catabolic process	21/22609	32/40888	1.18682	0.159188	0.957774	21
GO:0072347	biological_process	response to anesthetic	21/22609	32/40888	1.18682	0.159188	0.957774	21
GO:1901658	biological_process	glycosyl compound catabolic process	21/22609	32/40888	1.18682	0.159188	0.957774	21
GO:0016782	molecular_function	transferase activity, transferring sulfur-containing groups	48/22609	78/40888	1.11291	0.159601	0.957774	48
GO:0017053	cellular_component	transcriptional repressor complex	18/22609	27/40888	1.20566	0.159865	0.957774	18
GO:0043405	biological_process	regulation of MAP kinase activity	18/22609	27/40888	1.20566	0.159865	0.957774	18
GO:0043408	biological_process	regulation of MAPK cascade	18/22609	27/40888	1.20566	0.159865	0.957774	18
GO:0043622	biological_process	cortical microtubule organization	59/22609	97/40888	1.10001	0.160008	0.957774	59
GO:0006690	biological_process	icosanoid metabolic process	41/22609	66/40888	1.12345	0.16052	0.957774	41
GO:0043086	biological_process	negative regulation of catalytic activity	41/22609	66/40888	1.12345	0.16052	0.957774	41
GO:0055046	biological_process	microgametogenesis	41/22609	66/40888	1.12345	0.16052	0.957774	41
GO:1901463	biological_process	regulation of tetrapyrrole biosynthetic process	41/22609	66/40888	1.12345	0.16052	0.957774	41
GO:1903052	biological_process	positive regulation of proteolysis involved in cellular protein catabolic process	41/22609	66/40888	1.12345	0.16052	0.957774	41
GO:1903364	biological_process	positive regulation of cellular protein catabolic process	41/22609	66/40888	1.12345	0.16052	0.957774	41
GO:0040011	biological_process	locomotion	78/22609	130/40888	1.08509	0.160524	0.957774	78
GO:0009856	biological_process	pollination	387/22609	676/40888	1.03533	0.160812	0.957774	387
GO:0044706	biological_process	multi-multicellular organism process	387/22609	676/40888	1.03533	0.160812	0.957774	387
GO:0140096	molecular_function	catalytic activity, acting on a protein	3610/22609	6462/40888	1.01031	0.160864	0.957774	3610
GO:0003676	molecular_function	nucleic acid binding	5356/22609	9609/40888	1.00804	0.161048	0.957774	5356
GO:0006305	biological_process	DNA alkylation	63/22609	104/40888	1.09552	0.162084	0.957774	63
GO:0006306	biological_process	DNA methylation	63/22609	104/40888	1.09552	0.162084	0.957774	63
GO:0005576	cellular_component	extracellular region	1111/22609	1970/40888	1.01991	0.162512	0.957774	1111
GO:0010029	biological_process	regulation of seed germination	102/22609	172/40888	1.07247	0.162964	0.957774	102
GO:0009687	biological_process	abscisic acid metabolic process	31/22609	49/40888	1.14414	0.163848	0.957774	31
GO:0015294	molecular_function	solute:cation symporter activity	31/22609	49/40888	1.14414	0.163848	0.957774	31
GO:0043288	biological_process	apocarotenoid metabolic process	31/22609	49/40888	1.14414	0.163848	0.957774	31
GO:1902644	biological_process	tertiary alcohol metabolic process	31/22609	49/40888	1.14414	0.163848	0.957774	31
GO:0050832	biological_process	defense response to fungus	357/22609	623/40888	1.03632	0.164689	0.957774	357
GO:0005985	biological_process	sucrose metabolic process	45/22609	73/40888	1.11482	0.165048	0.957774	45
GO:2001057	biological_process	reactive nitrogen species metabolic process	45/22609	73/40888	1.11482	0.165048	0.957774	45
GO:0019684	biological_process	photosynthesis, light reaction	71/22609	118/40888	1.08816	0.165119	0.957774	71
GO:0007584	biological_process	response to nutrient	56/22609	92/40888	1.10082	0.165667	0.957774	56
GO:0009968	biological_process	negative regulation of signal transduction	173/22609	297/40888	1.05343	0.166265	0.957774	173
GO:0010648	biological_process	negative regulation of cell communication	173/22609	297/40888	1.05343	0.166265	0.957774	173
GO:0023057	biological_process	negative regulation of signaling	173/22609	297/40888	1.05343	0.166265	0.957774	173
GO:0009812	biological_process	flavonoid metabolic process	79/22609	132/40888	1.08235	0.167016	0.957774	79
GO:0009250	biological_process	glucan biosynthetic process	169/22609	290/40888	1.05391	0.167217	0.957774	169
GO:0004049	molecular_function	anthranilate synthase activity	5/22609	6/40888	1.50707	0.167219	0.957774	5
GO:0005217	molecular_function	intracellular ligand-gated ion channel activity	5/22609	6/40888	1.50707	0.167219	0.957774	5
GO:0005221	molecular_function	intracellular cyclic nucleotide activated cation channel activity	5/22609	6/40888	1.50707	0.167219	0.957774	5
GO:0005872	cellular_component	minus-end kinesin complex	5/22609	6/40888	1.50707	0.167219	0.957774	5
GO:0007053	biological_process	spindle assembly involved in male meiosis	5/22609	6/40888	1.50707	0.167219	0.957774	5
GO:0009836	biological_process	fruit ripening, climacteric	5/22609	6/40888	1.50707	0.167219	0.957774	5
GO:0009971	biological_process	anastral spindle assembly involved in male meiosis	5/22609	6/40888	1.50707	0.167219	0.957774	5
GO:0009988	biological_process	cell-cell recognition	5/22609	6/40888	1.50707	0.167219	0.957774	5
GO:0010322	biological_process	regulation of isopentenyl diphosphate biosynthetic process, methylerythritol 4-phosphate pathway	5/22609	6/40888	1.50707	0.167219	0.957774	5
GO:0016123	biological_process	xanthophyll biosynthetic process	5/22609	6/40888	1.50707	0.167219	0.957774	5
GO:0017046	molecular_function	peptide hormone binding	5/22609	6/40888	1.50707	0.167219	0.957774	5
GO:0017198	biological_process	N-terminal peptidyl-serine acetylation	5/22609	6/40888	1.50707	0.167219	0.957774	5
GO:0018002	biological_process	N-terminal peptidyl-glutamic acid acetylation	5/22609	6/40888	1.50707	0.167219	0.957774	5
GO:0018200	biological_process	peptidyl-glutamic acid modification	5/22609	6/40888	1.50707	0.167219	0.957774	5
GO:0030875	cellular_component	rDNA protrusion	5/22609	6/40888	1.50707	0.167219	0.957774	5
GO:0030920	biological_process	peptidyl-serine acetylation	5/22609	6/40888	1.50707	0.167219	0.957774	5
GO:0031415	cellular_component	NatA complex	5/22609	6/40888	1.50707	0.167219	0.957774	5
GO:0031930	biological_process	mitochondria-nucleus signaling pathway	5/22609	6/40888	1.50707	0.167219	0.957774	5
GO:0043137	biological_process	DNA replication, removal of RNA primer	5/22609	6/40888	1.50707	0.167219	0.957774	5
GO:0043855	molecular_function	cyclic nucleotide-gated ion channel activity	5/22609	6/40888	1.50707	0.167219	0.957774	5
GO:0044090	biological_process	positive regulation of vacuole organization	5/22609	6/40888	1.50707	0.167219	0.957774	5
GO:0051427	molecular_function	hormone receptor binding	5/22609	6/40888	1.50707	0.167219	0.957774	5
GO:0051428	molecular_function	peptide hormone receptor binding	5/22609	6/40888	1.50707	0.167219	0.957774	5
GO:0055048	biological_process	anastral spindle assembly	5/22609	6/40888	1.50707	0.167219	0.957774	5
GO:0070208	biological_process	protein heterotrimerization	5/22609	6/40888	1.50707	0.167219	0.957774	5
GO:0071071	biological_process	regulation of phospholipid biosynthetic process	5/22609	6/40888	1.50707	0.167219	0.957774	5
GO:0080173	biological_process	male-female gamete recognition during double fertilization forming a zygote and endosperm	5/22609	6/40888	1.50707	0.167219	0.957774	5
GO:0090059	biological_process	protoxylem development	5/22609	6/40888	1.50707	0.167219	0.957774	5
GO:0099636	biological_process	cytoplasmic streaming	5/22609	6/40888	1.50707	0.167219	0.957774	5
GO:0120091	molecular_function	jasmonic acid hydrolase	5/22609	6/40888	1.50707	0.167219	0.957774	5
GO:1902478	biological_process	negative regulation of defense response to bacterium, incompatible interaction	5/22609	6/40888	1.50707	0.167219	0.957774	5
GO:1903321	biological_process	negative regulation of protein modification by small protein conjugation or removal	5/22609	6/40888	1.50707	0.167219	0.957774	5
GO:1903725	biological_process	regulation of phospholipid metabolic process	5/22609	6/40888	1.50707	0.167219	0.957774	5
GO:1990189	molecular_function	peptide-serine-N-acetyltransferase activity	5/22609	6/40888	1.50707	0.167219	0.957774	5
GO:1990190	molecular_function	peptide-glutamate-N-acetyltransferase activity	5/22609	6/40888	1.50707	0.167219	0.957774	5
GO:0090056	biological_process	regulation of chlorophyll metabolic process	60/22609	99/40888	1.09605	0.167862	0.957774	60
GO:0000097	biological_process	sulfur amino acid biosynthetic process	111/22609	188/40888	1.06777	0.167987	0.957774	111
GO:1901568	biological_process	fatty acid derivative metabolic process	87/22609	146/40888	1.07766	0.168071	0.957774	87
GO:0000103	biological_process	sulfate assimilation	28/22609	44/40888	1.15085	0.168229	0.957774	28
GO:0031306	cellular_component	intrinsic component of mitochondrial outer membrane	28/22609	44/40888	1.15085	0.168229	0.957774	28
GO:0031307	cellular_component	integral component of mitochondrial outer membrane	28/22609	44/40888	1.15085	0.168229	0.957774	28
GO:0055080	biological_process	cation homeostasis	345/22609	602/40888	1.03642	0.168557	0.957774	345
GO:0051336	biological_process	regulation of hydrolase activity	49/22609	80/40888	1.1077	0.168679	0.957774	49
GO:0000301	biological_process	retrograde transport, vesicle recycling within Golgi	3/22609	3/40888	1.80848	0.169056	0.957774	3
GO:0000789	cellular_component	cytoplasmic chromatin	3/22609	3/40888	1.80848	0.169056	0.957774	3
GO:0000820	biological_process	regulation of glutamine family amino acid metabolic process	3/22609	3/40888	1.80848	0.169056	0.957774	3
GO:0004015	molecular_function	adenosylmethionine-8-amino-7-oxononanoate transaminase activity	3/22609	3/40888	1.80848	0.169056	0.957774	3
GO:0004038	molecular_function	allantoinase activity	3/22609	3/40888	1.80848	0.169056	0.957774	3
GO:0004357	molecular_function	glutamate-cysteine ligase activity	3/22609	3/40888	1.80848	0.169056	0.957774	3
GO:0004425	molecular_function	indole-3-glycerol-phosphate synthase activity	3/22609	3/40888	1.80848	0.169056	0.957774	3
GO:0004528	molecular_function	phosphodiesterase I activity	3/22609	3/40888	1.80848	0.169056	0.957774	3
GO:0004585	molecular_function	ornithine carbamoyltransferase activity	3/22609	3/40888	1.80848	0.169056	0.957774	3
GO:0004633	molecular_function	phosphopantothenoylcysteine decarboxylase activity	3/22609	3/40888	1.80848	0.169056	0.957774	3
GO:0004795	molecular_function	threonine synthase activity	3/22609	3/40888	1.80848	0.169056	0.957774	3
GO:0005656	cellular_component	nuclear pre-replicative complex	3/22609	3/40888	1.80848	0.169056	0.957774	3
GO:0006005	biological_process	L-fucose biosynthetic process	3/22609	3/40888	1.80848	0.169056	0.957774	3
GO:0006335	biological_process	DNA replication-dependent nucleosome assembly	3/22609	3/40888	1.80848	0.169056	0.957774	3
GO:0006851	biological_process	mitochondrial calcium ion transmembrane transport	3/22609	3/40888	1.80848	0.169056	0.957774	3
GO:0008373	molecular_function	sialyltransferase activity	3/22609	3/40888	1.80848	0.169056	0.957774	3
GO:0008395	molecular_function	steroid hydroxylase activity	3/22609	3/40888	1.80848	0.169056	0.957774	3
GO:0008418	molecular_function	protein-N-terminal asparagine amidohydrolase activity	3/22609	3/40888	1.80848	0.169056	0.957774	3
GO:0008447	molecular_function	L-ascorbate oxidase activity	3/22609	3/40888	1.80848	0.169056	0.957774	3
GO:0008962	molecular_function	phosphatidylglycerophosphatase activity	3/22609	3/40888	1.80848	0.169056	0.957774	3
GO:0009360	cellular_component	DNA polymerase III complex	3/22609	3/40888	1.80848	0.169056	0.957774	3
GO:0010034	biological_process	response to acetate	3/22609	3/40888	1.80848	0.169056	0.957774	3
GO:0010279	molecular_function	indole-3-acetic acid amido synthetase activity	3/22609	3/40888	1.80848	0.169056	0.957774	3
GO:0010493	biological_process	Lewis a epitope biosynthetic process	3/22609	3/40888	1.80848	0.169056	0.957774	3
GO:0010617	biological_process	circadian regulation of calcium ion oscillation	3/22609	3/40888	1.80848	0.169056	0.957774	3
GO:0010964	biological_process	regulation of chromatin silencing by small RNA	3/22609	3/40888	1.80848	0.169056	0.957774	3
GO:0015232	molecular_function	heme transporter activity	3/22609	3/40888	1.80848	0.169056	0.957774	3
GO:0015805	biological_process	S-adenosyl-L-methionine transport	3/22609	3/40888	1.80848	0.169056	0.957774	3
GO:0015858	biological_process	nucleoside transport	3/22609	3/40888	1.80848	0.169056	0.957774	3
GO:0016031	biological_process	tRNA import into mitochondrion	3/22609	3/40888	1.80848	0.169056	0.957774	3
GO:0016255	biological_process	attachment of GPI anchor to protein	3/22609	3/40888	1.80848	0.169056	0.957774	3
GO:0016477	biological_process	cell migration	3/22609	3/40888	1.80848	0.169056	0.957774	3
GO:0016578	biological_process	histone deubiquitination	3/22609	3/40888	1.80848	0.169056	0.957774	3
GO:0016971	molecular_function	flavin-linked sulfhydryl oxidase activity	3/22609	3/40888	1.80848	0.169056	0.957774	3
GO:0016972	molecular_function	thiol oxidase activity	3/22609	3/40888	1.80848	0.169056	0.957774	3
GO:0022417	biological_process	protein maturation by protein folding	3/22609	3/40888	1.80848	0.169056	0.957774	3
GO:0030002	biological_process	cellular anion homeostasis	3/22609	3/40888	1.80848	0.169056	0.957774	3
GO:0030320	biological_process	cellular monovalent inorganic anion homeostasis	3/22609	3/40888	1.80848	0.169056	0.957774	3
GO:0030866	biological_process	cortical actin cytoskeleton organization	3/22609	3/40888	1.80848	0.169056	0.957774	3
GO:0031293	biological_process	membrane protein intracellular domain proteolysis	3/22609	3/40888	1.80848	0.169056	0.957774	3
GO:0031440	biological_process	regulation of mRNA 3'-end processing	3/22609	3/40888	1.80848	0.169056	0.957774	3
GO:0031567	biological_process	mitotic cell size control checkpoint	3/22609	3/40888	1.80848	0.169056	0.957774	3
GO:0033907	molecular_function	beta-D-fucosidase activity	3/22609	3/40888	1.80848	0.169056	0.957774	3
GO:0034086	biological_process	maintenance of sister chromatid cohesion	3/22609	3/40888	1.80848	0.169056	0.957774	3
GO:0034473	biological_process	U1 snRNA 3'-end processing	3/22609	3/40888	1.80848	0.169056	0.957774	3
GO:0034476	biological_process	U5 snRNA 3'-end processing	3/22609	3/40888	1.80848	0.169056	0.957774	3
GO:0034704	cellular_component	calcium channel complex	3/22609	3/40888	1.80848	0.169056	0.957774	3
GO:0034723	biological_process	DNA replication-dependent nucleosome organization	3/22609	3/40888	1.80848	0.169056	0.957774	3
GO:0035927	biological_process	RNA import into mitochondrion	3/22609	3/40888	1.80848	0.169056	0.957774	3
GO:0036387	cellular_component	pre-replicative complex	3/22609	3/40888	1.80848	0.169056	0.957774	3
GO:0036444	biological_process	calcium import into the mitochondrion	3/22609	3/40888	1.80848	0.169056	0.957774	3
GO:0043879	molecular_function	glycolate transmembrane transporter activity	3/22609	3/40888	1.80848	0.169056	0.957774	3
GO:0045041	biological_process	protein import into mitochondrial intermembrane space	3/22609	3/40888	1.80848	0.169056	0.957774	3
GO:0046509	molecular_function	1,2-diacylglycerol 3-beta-galactosyltransferase activity	3/22609	3/40888	1.80848	0.169056	0.957774	3
GO:0046740	biological_process	transport of virus in host, cell to cell	3/22609	3/40888	1.80848	0.169056	0.957774	3
GO:0047998	molecular_function	hyoscyamine (6S)-dioxygenase activity	3/22609	3/40888	1.80848	0.169056	0.957774	3
GO:0048462	biological_process	carpel formation	3/22609	3/40888	1.80848	0.169056	0.957774	3
GO:0048654	biological_process	anther morphogenesis	3/22609	3/40888	1.80848	0.169056	0.957774	3
GO:0048655	biological_process	anther wall tapetum morphogenesis	3/22609	3/40888	1.80848	0.169056	0.957774	3
GO:0048656	biological_process	anther wall tapetum formation	3/22609	3/40888	1.80848	0.169056	0.957774	3
GO:0048657	biological_process	anther wall tapetum cell differentiation	3/22609	3/40888	1.80848	0.169056	0.957774	3
GO:0050265	molecular_function	RNA uridylyltransferase activity	3/22609	3/40888	1.80848	0.169056	0.957774	3
GO:0050408	molecular_function	[pyruvate kinase]-phosphatase activity	3/22609	3/40888	1.80848	0.169056	0.957774	3
GO:0051480	biological_process	regulation of cytosolic calcium ion concentration	3/22609	3/40888	1.80848	0.169056	0.957774	3
GO:0051560	biological_process	mitochondrial calcium ion homeostasis	3/22609	3/40888	1.80848	0.169056	0.957774	3
GO:0060401	biological_process	cytosolic calcium ion transport	3/22609	3/40888	1.80848	0.169056	0.957774	3
GO:0060586	biological_process	multicellular organismal iron ion homeostasis	3/22609	3/40888	1.80848	0.169056	0.957774	3
GO:0061062	biological_process	regulation of nematode larval development	3/22609	3/40888	1.80848	0.169056	0.957774	3
GO:0061388	biological_process	regulation of rate of cell growth	3/22609	3/40888	1.80848	0.169056	0.957774	3
GO:0070574	biological_process	cadmium ion transmembrane transport	3/22609	3/40888	1.80848	0.169056	0.957774	3
GO:0070773	molecular_function	protein-N-terminal glutamine amidohydrolase activity	3/22609	3/40888	1.80848	0.169056	0.957774	3
GO:0071042	biological_process	nuclear polyadenylation-dependent mRNA catabolic process	3/22609	3/40888	1.80848	0.169056	0.957774	3
GO:0071047	biological_process	polyadenylation-dependent mRNA catabolic process	3/22609	3/40888	1.80848	0.169056	0.957774	3
GO:0071076	biological_process	RNA 3' uridylation	3/22609	3/40888	1.80848	0.169056	0.957774	3
GO:0071311	biological_process	cellular response to acetate	3/22609	3/40888	1.80848	0.169056	0.957774	3
GO:0071475	biological_process	cellular hyperosmotic salinity response	3/22609	3/40888	1.80848	0.169056	0.957774	3
GO:0071485	biological_process	cellular response to absence of light	3/22609	3/40888	1.80848	0.169056	0.957774	3
GO:0071513	cellular_component	phosphopantothenoylcysteine decarboxylase complex	3/22609	3/40888	1.80848	0.169056	0.957774	3
GO:0071596	biological_process	ubiquitin-dependent protein catabolic process via the N-end rule pathway	3/22609	3/40888	1.80848	0.169056	0.957774	3
GO:0071629	biological_process	cytoplasm protein quality control by the ubiquitin-proteasome system	3/22609	3/40888	1.80848	0.169056	0.957774	3
GO:0071932	biological_process	replication fork reversal	3/22609	3/40888	1.80848	0.169056	0.957774	3
GO:0080006	biological_process	internode patterning	3/22609	3/40888	1.80848	0.169056	0.957774	3
GO:0080079	molecular_function	cellobiose glucosidase activity	3/22609	3/40888	1.80848	0.169056	0.957774	3
[truncated: 7,519 more rows]
